# Supplementary material for: Identification of a transcriptional signature found in multiple models of ASD and related disorders
Source: HighWire-hosted journal article supplement (doi:10.1101/gr.276591.122), 2022-09-01
Supplement: Supplemental_Table_S1.xlsx [file Supplemental_Table_S1.xlsx]

## Sheet: Legend
Supplemental_Table_S1
Differential expression analysis results tables.
Sheet 1 shows DESeq2 results comparing neurons infected by luciferase and uninfected neurons.
Sheets 2-6 shows DESeq2 results comparing neurons infected by luciferase and shRNA against one of the 5 ASD-linked chromatin modifiers (ALCM), respectively.
Sheet 7 shows limma voom results comparing neurons infected by Luciferase and the pooled ALCM samples

## Sheet: Lucif_v_Uninfected
	GeneSymbol	baseMean	log2FoldChange	lfcSE	stat	pvalue	padj
ENSMUSG00000000001	Gnai3	2577.4	0.0277427	0.0982576	0.282347	0.777678	0.999943
ENSMUSG00000000028	Cdc45	61.5628	0.188163	0.33699	0.558363	0.576597	0.999943
ENSMUSG00000000031	H19	23.5407	0.343024	0.478958	0.716188	0.473875	0.999943
ENSMUSG00000000037	Scml2	49.5942	0.0942665	0.333211	0.282903	0.777251	0.999943
ENSMUSG00000000049	Apoh	2.45899	0.888729	1.38616	0.641145	0.521429	NA
ENSMUSG00000000056	Narf	3493.67	-0.0707713	0.0932016	-0.759335	0.447652	0.999943
ENSMUSG00000000058	Cav2	727.138	-0.0299304	0.170786	-0.175251	0.860883	0.999943
ENSMUSG00000000078	Klf6	2694.89	0.0535942	0.154687	0.346469	0.72899	0.999943
ENSMUSG00000000085	Scmh1	1212.34	-0.0591239	0.115351	-0.512555	0.608262	0.999943
ENSMUSG00000000088	Cox5a	2968.58	0.0823879	0.115814	0.711381	0.476848	0.999943
ENSMUSG00000000093	Tbx2	1.65054	0.180017	1.65955	0.108474	0.91362	NA
ENSMUSG00000000120	Ngfr	42.3502	0.272044	0.387692	0.701702	0.482865	0.999943
ENSMUSG00000000125	Wnt3	83.2706	-0.118495	0.237701	-0.498504	0.618129	0.999943
ENSMUSG00000000126	Wnt9a	324.191	0.250911	0.169186	1.48305	0.138061	0.999943
ENSMUSG00000000127	Fer	723.137	0.171708	0.161119	1.06572	0.28655	0.999943
ENSMUSG00000000131	Xpo6	2551.11	-0.0510597	0.100858	-0.506252	0.61268	0.999943
ENSMUSG00000000134	Tfe3	975.175	0.176341	0.165307	1.06675	0.286085	0.999943
ENSMUSG00000000142	Axin2	316.679	0.25091	0.183717	1.36574	0.172019	0.999943
ENSMUSG00000000148	Brat1	702.924	0.0878674	0.124988	0.703008	0.482051	0.999943
ENSMUSG00000000149	Gna12	2850.79	0.0431985	0.0881494	0.490059	0.624092	0.999943
ENSMUSG00000000154	Slc22a18	1.4732	-0.557309	1.75611	-0.317354	0.750975	NA
ENSMUSG00000000167	Pih1d2	22.9015	1.14658	0.449267	2.55212	0.010707	0.840072
ENSMUSG00000000168	Dlat	2443.92	-0.00358305	0.0905717	-0.0395603	0.968444	0.999943
ENSMUSG00000000171	Sdhd	2474.21	-0.0318445	0.116634	-0.273028	0.784831	0.999943
ENSMUSG00000000182	Fgf23	6.58729	-0.260093	0.837691	-0.310488	0.75619	0.999943
ENSMUSG00000000184	Ccnd2	8815.75	0.133704	0.131003	1.02062	0.307436	0.999943
ENSMUSG00000000194	Gpr107	2607.83	0.0759682	0.135017	0.562656	0.573669	0.999943
ENSMUSG00000000197	Nalcn	2529.09	-0.113476	0.111311	-1.01945	0.307988	0.999943
ENSMUSG00000000202	Btbd17	311.064	0.243337	0.185742	1.31008	0.190169	0.999943
ENSMUSG00000000214	Th	9.63239	-0.561081	0.797521	-0.703531	0.481725	0.999943
ENSMUSG00000000216	Scnn1g	0.682848	-1.26227	2.50337	-0.504229	0.6141	NA
ENSMUSG00000000223	Drp2	1315.26	0.059131	0.121199	0.487884	0.625632	0.999943
ENSMUSG00000000244	Tspan32	1.60344	2.42353	2.53016	0.95786	0.338133	NA
ENSMUSG00000000247	Lhx2	3741.62	-0.0563861	0.144394	-0.390503	0.696165	0.999943
ENSMUSG00000000253	Gmpr	419.827	-0.231172	0.175406	-1.31792	0.187529	0.999943
ENSMUSG00000000266	Mid2	839.386	-0.0843929	0.216457	-0.389882	0.696623	0.999943
ENSMUSG00000000275	Trim25	43.044	0.279839	0.357476	0.782821	0.433732	0.999943
ENSMUSG00000000276	Dgke	1768.89	-0.213441	0.130511	-1.63543	0.101958	0.999943
ENSMUSG00000000278	Scpep1	921.708	0.0451307	0.112712	0.400406	0.688858	0.999943
ENSMUSG00000000282	Mnt	1956.79	0.0254591	0.126514	0.201235	0.840515	0.999943
ENSMUSG00000000290	Itgb2	2.57945	1.00507	1.33724	0.751604	0.452289	NA
ENSMUSG00000000295	Hddc2	289.862	-0.142244	0.176138	-0.807569	0.419339	0.999943
ENSMUSG00000000296	Tpd52l1	207.145	-0.0964613	0.174212	-0.553702	0.579783	0.999943
ENSMUSG00000000301	Pemt	70.1697	-0.200874	0.293313	-0.684845	0.493442	0.999943
ENSMUSG00000000303	Cdh1	1.36806	0.481564	2.0967	0.229677	0.818343	NA
ENSMUSG00000000305	Cdh4	2463.77	0.0920806	0.177806	0.51787	0.604549	0.999943
ENSMUSG00000000308	Ckmt1	1868.95	0.200475	0.13058	1.53527	0.124716	0.999943
ENSMUSG00000000317	Bcl6b	68.6843	0.0944985	0.28877	0.327245	0.743482	0.999943
ENSMUSG00000000318	Clec10a	0.835849	0.99219	2.72016	0.364755	0.715295	NA
ENSMUSG00000000320	Alox12	1.06881	-0.53925	2.17817	-0.24757	0.804467	NA
ENSMUSG00000000325	NA	1381.18	-0.142376	0.139006	-1.02424	0.30572	0.999943
ENSMUSG00000000326	Comt	1586.31	-0.00470562	0.0970207	-0.0485012	0.961317	0.999943
ENSMUSG00000000339	Rtca	1140.64	-0.106711	0.151664	-0.703602	0.48168	0.999943
ENSMUSG00000000340	Dbt	561.024	-0.171454	0.203501	-0.842522	0.399496	0.999943
ENSMUSG00000000346	Dazap2	2437.82	0.0820223	0.0937372	0.875024	0.381561	0.999943
ENSMUSG00000000355	Mcts1	831.312	0.0599991	0.152162	0.394311	0.693352	0.999943
ENSMUSG00000000365	Rnf17	19.6647	-0.441971	0.547137	-0.807789	0.419212	0.999943
ENSMUSG00000000374	Trappc10	3252.83	0.0793169	0.147468	0.53786	0.590674	0.999943
ENSMUSG00000000378	Ccm2	1252.23	0.0205371	0.172608	0.118981	0.90529	0.999943
ENSMUSG00000000384	Tbrg4	594.131	0.00629261	0.127268	0.0494438	0.960566	0.999943
ENSMUSG00000000385	Tmprss2	3.64072	-1.25655	1.45756	-0.862089	0.388638	0.999943
ENSMUSG00000000386	Mx1	5.24716	-2.05415	1.2497	-1.64372	0.100234	0.999943
ENSMUSG00000000392	Fap	10.4432	0.526455	0.777363	0.677232	0.498259	0.999943
ENSMUSG00000000394	Gcg	0.764071	-1.10633	2.79388	-0.395983	0.692118	NA
ENSMUSG00000000399	Ndufa9	2122.36	0.0389235	0.111329	0.349625	0.72662	0.999943
ENSMUSG00000000402	Egfl6	7.24334	0.131773	0.794083	0.165944	0.868201	0.999943
ENSMUSG00000000409	Lck	324.566	0.00462493	0.159574	0.028983	0.976878	0.999943
ENSMUSG00000000411	Tssk3	0.95672	-0.875754	2.04929	-0.427346	0.669127	NA
ENSMUSG00000000416	Cttnbp2	1244.5	-0.356961	0.235522	-1.51562	0.129616	0.999943
ENSMUSG00000000420	Galnt1	1338.82	-0.173822	0.1514	-1.1481	0.250929	0.999943
ENSMUSG00000000439	Mkrn2	1534.31	-0.0447612	0.113447	-0.394556	0.69317	0.999943
ENSMUSG00000000440	Pparg	13.0855	-0.118505	0.615509	-0.192532	0.847325	0.999943
ENSMUSG00000000441	Raf1	2755.41	0.067766	0.134012	0.505672	0.613087	0.999943
ENSMUSG00000000486	Septin1	11.6241	-0.334432	0.622254	-0.537453	0.590955	0.999943
ENSMUSG00000000489	Pdgfb	695.281	0.142567	0.146382	0.97394	0.330087	0.999943
ENSMUSG00000000530	Acvrl1	5.27043	-0.06792	1.14031	-0.0595627	0.952504	0.999943
ENSMUSG00000000531	Tamalin	245.656	-0.0389058	0.1846	-0.210757	0.833077	0.999943
ENSMUSG00000000532	Acvr1b	4620.59	0.05028	0.0780558	0.644156	0.519475	0.999943
ENSMUSG00000000538	Tom1l2	4746.84	0.108488	0.119618	0.906954	0.364431	0.999943
ENSMUSG00000000544	Gpa33	0.807926	-1.74649	2.76472	-0.631707	0.527579	NA
ENSMUSG00000000552	Zfp385a	760.719	0.167458	0.125103	1.33856	0.180715	0.999943
ENSMUSG00000000555	Itga5	119.929	0.561501	0.265936	2.11141	0.0347369	0.999943
ENSMUSG00000000560	Gabra2	7310.93	-0.0530267	0.138153	-0.383825	0.701108	0.999943
ENSMUSG00000000561	Wdr77	1756.76	0.0562124	0.108346	0.518824	0.603883	0.999943
ENSMUSG00000000562	Adora3	1.2135	-1.2105	2.15975	-0.560483	0.57515	NA
ENSMUSG00000000563	Atp5pb	5175.24	0.0719891	0.0824242	0.873398	0.382446	0.999943
ENSMUSG00000000567	Sox9	714.005	0.18569	0.127268	1.45904	0.144553	0.999943
ENSMUSG00000000568	Hnrnpd	4707.87	0.00936224	0.120282	0.0778354	0.937959	0.999943
ENSMUSG00000000579	Dynlt1c	47.9593	0.190728	0.48696	0.39167	0.695302	0.999943
ENSMUSG00000000581	C1d	1326.29	-0.161711	0.187333	-0.863228	0.388012	0.999943
ENSMUSG00000000594	Gm2a	2269.16	0.133558	0.10548	1.26619	0.205444	0.999943
ENSMUSG00000000600	Krit1	722.443	-0.00311087	0.117448	-0.0264873	0.978869	0.999943
ENSMUSG00000000605	Clcn4	7969.11	-0.265735	0.151885	-1.74958	0.0801915	0.999943
ENSMUSG00000000606	Vmn2r88	2.72091	-0.367	1.27373	-0.288129	0.773248	NA
ENSMUSG00000000617	Grm6	0.653861	1.72433	2.96374	0.58181	0.560695	NA
ENSMUSG00000000627	Sema4f	1904.71	0.213569	0.117915	1.81121	0.070108	0.999943
ENSMUSG00000000628	Hk2	982.787	-0.341175	0.211889	-1.61016	0.107363	0.999943
ENSMUSG00000000631	Myo18a	4079.41	0.0114318	0.106629	0.107211	0.914622	0.999943
ENSMUSG00000000632	Sez6	5558.42	-0.171759	0.100634	-1.70677	0.087865	0.999943
ENSMUSG00000000686	Abhd15	15.3551	0.146542	0.622644	0.235354	0.813934	0.999943
ENSMUSG00000000693	Loxl3	81.7942	0.290593	0.475375	0.611292	0.541006	0.999943
ENSMUSG00000000706	Btn1a1	1.4919	1.28387	2.11557	0.606865	0.54394	NA
ENSMUSG00000000708	Kat2b	214.503	-0.226705	0.225059	-1.00731	0.313785	0.999943
ENSMUSG00000000711	Rab5b	4387.57	0.07499	0.0819614	0.914943	0.360222	0.999943
ENSMUSG00000000724	Cryba1	1.23192	-2.70654	2.12523	-1.27353	0.202829	NA
ENSMUSG00000000731	Aire	2.05454	0.0258643	1.76567	0.0146484	0.988313	NA
ENSMUSG00000000732	Icosl	15.5542	0.631278	0.566375	1.11459	0.265024	0.999943
ENSMUSG00000000738	Spg7	864.766	-0.16713	0.202599	-0.824932	0.40941	0.999943
ENSMUSG00000000739	Sult5a1	6.8856	-0.551701	0.874444	-0.630917	0.528095	0.999943
ENSMUSG00000000740	Rpl13	2534.85	-0.279664	0.254321	-1.09965	0.271486	0.999943
ENSMUSG00000000743	Chmp1a	3738.76	0.296747	0.105366	2.81634	0.00485737	0.586429
ENSMUSG00000000751	Rpa1	996.706	-0.0774271	0.12501	-0.619367	0.535675	0.999943
ENSMUSG00000000753	Serpinf1	148.844	-0.0752821	0.23032	-0.32686	0.743774	0.999943
ENSMUSG00000000759	Tubgcp3	976.748	-0.0947893	0.131629	-0.720128	0.471446	0.999943
ENSMUSG00000000766	Oprm1	44.0766	1.28044	1.35645	0.943966	0.345187	0.999943
ENSMUSG00000000776	Polr3d	692.076	0.0750125	0.245641	0.305375	0.760081	0.999943
ENSMUSG00000000782	Tcf7	12.6114	-0.381609	0.629124	-0.606572	0.544135	0.999943
ENSMUSG00000000787	Ddx3x	5766.44	-0.122699	0.177806	-0.690073	0.490148	0.999943
ENSMUSG00000000791	Il12rb1	16.6774	-0.860858	0.558989	-1.54003	0.123554	0.999943
ENSMUSG00000000792	Slc5a5	37.7342	0.29244	0.35131	0.832429	0.405167	0.999943
ENSMUSG00000000794	Kcnn3	797.169	0.0641455	0.171592	0.373825	0.708534	0.999943
ENSMUSG00000000804	Usp32	3295.63	-0.232521	0.208137	-1.11715	0.263929	0.999943
ENSMUSG00000000805	Car4	32.6205	-0.176292	0.492352	-0.358062	0.720297	0.999943
ENSMUSG00000000811	Txnrd3	455.32	0.0365987	0.139537	0.262286	0.793101	0.999943
ENSMUSG00000000817	Fasl	4.80321	-0.970541	1.09904	-0.883084	0.377191	0.999943
ENSMUSG00000000823	Zfp512b	2888.61	0.0597976	0.121285	0.493035	0.621988	0.999943
ENSMUSG00000000826	Dnajc5	12690.8	-0.0885484	0.0965106	-0.917499	0.358881	0.999943
ENSMUSG00000000827	Tpd52l2	1119.37	-0.0932137	0.123354	-0.755661	0.449853	0.999943
ENSMUSG00000000838	Fmr1	2055.7	-0.0741585	0.12412	-0.597472	0.550192	0.999943
ENSMUSG00000000861	Bcl11a	2221.75	0.102277	0.106473	0.960585	0.336761	0.999943
ENSMUSG00000000869	Il4	170.198	-0.133743	0.176788	-0.756516	0.44934	0.999943
ENSMUSG00000000876	Pxmp4	674.861	0.144956	0.150696	0.961914	0.336093	0.999943
ENSMUSG00000000881	Dlg3	4720.75	-0.0405639	0.138843	-0.292158	0.770166	0.999943
ENSMUSG00000000884	Gnb1l	216.444	0.243683	0.18034	1.35125	0.176617	0.999943
ENSMUSG00000000889	Dbh	9.27021	-0.0327576	0.68593	-0.0477565	0.96191	0.999943
ENSMUSG00000000901	Mmp11	39.608	-0.0112852	0.575308	-0.0196159	0.98435	0.999943
ENSMUSG00000000902	Smarcb1	1779.22	-0.00548897	0.122241	-0.0449027	0.964185	0.999943
ENSMUSG00000000903	Vpreb3	0.87554	-3.14992	2.51398	-1.25296	0.21022	NA
ENSMUSG00000000915	Hip1r	1828.1	-0.189354	0.0971461	-1.94917	0.0512752	0.999943
ENSMUSG00000000916	Nsun5	210.925	-0.155146	0.189637	-0.818121	0.413288	0.999943
ENSMUSG00000000934	Top1mt	372.046	0.0770408	0.192226	0.400783	0.68858	0.999943
ENSMUSG00000000948	NA	488.109	0.628119	0.299131	2.09981	0.0357453	0.999943
ENSMUSG00000000957	Mmp14	806.411	0.109149	0.104013	1.04938	0.294004	0.999943
ENSMUSG00000000958	Slc7a7	21.3542	0.148393	0.548989	0.270302	0.786928	0.999943
ENSMUSG00000000959	Oxa1l	1294.14	0.168164	0.109962	1.52929	0.126192	0.999943
ENSMUSG00000000976	Heatr6	676.904	-0.106894	0.164459	-0.649974	0.515709	0.999943
ENSMUSG00000000983	Wfdc18	1.19591	-0.0967494	1.90132	-0.0508853	0.959417	NA
ENSMUSG00000001014	Icam4	8.04605	-0.607399	1.24015	-0.489779	0.62429	0.999943
ENSMUSG00000001016	Ilf2	2161.85	0.038067	0.0948663	0.401269	0.688222	0.999943
ENSMUSG00000001017	Chtop	4287.69	0.00478601	0.113637	0.0421168	0.966406	0.999943
ENSMUSG00000001018	Snapin	865.384	0.155508	0.122885	1.26548	0.205701	0.999943
ENSMUSG00000001020	S100a4	5.45494	-0.0495812	0.919877	-0.0538998	0.957015	0.999943
ENSMUSG00000001021	S100a3	3.32436	-0.122043	1.37868	-0.0885214	0.929462	0.999943
ENSMUSG00000001025	S100a6	35.6374	0.440565	0.445362	0.989229	0.322551	0.999943
ENSMUSG00000001027	Scn4a	1.02511	-0.513622	2.60057	-0.197503	0.843434	NA
ENSMUSG00000001034	Mapk7	1739.25	0.120102	0.108757	1.10431	0.269457	0.999943
ENSMUSG00000001036	Epn2	2481.48	0.00335817	0.0889009	0.0377743	0.969868	0.999943
ENSMUSG00000001039	B9d1	184.664	-0.0273367	0.237026	-0.115332	0.908182	0.999943
ENSMUSG00000001052	Sec24b	1798.08	-0.171137	0.148241	-1.15445	0.248314	0.999943
ENSMUSG00000001053	N4bp3	284.651	0.396579	0.183432	2.162	0.0306184	0.999943
ENSMUSG00000001054	Rmnd5b	954.127	0.135674	0.186275	0.728356	0.466396	0.999943
ENSMUSG00000001056	Nhp2	721.569	0.0196852	0.173916	0.113188	0.909882	0.999943
ENSMUSG00000001062	Vps9d1	1299.13	-0.269588	0.156047	-1.7276	0.0840598	0.999943
ENSMUSG00000001065	Zfp276	418.241	0.146404	0.709941	0.206221	0.836619	0.999943
ENSMUSG00000001076	C1ql4	5.89494	0.670163	0.881382	0.760355	0.447042	0.999943
ENSMUSG00000001082	Mfsd10	389.367	0.299051	0.292118	1.02373	0.305961	0.999943
ENSMUSG00000001089	Luzp1	844.545	0.40493	0.30287	1.33698	0.181231	0.999943
ENSMUSG00000001098	Kctd10	1374.6	-0.0629208	0.113469	-0.554521	0.579222	0.999943
ENSMUSG00000001100	Poldip2	1853.3	0.0348079	0.111433	0.312365	0.754763	0.999943
ENSMUSG00000001103	Sebox	5.79871	-0.130716	0.870562	-0.150151	0.880645	0.999943
ENSMUSG00000001105	Ift20	899.196	0.0549819	0.163536	0.336207	0.736715	0.999943
ENSMUSG00000001119	Col6a1	251.166	0.0815229	0.164617	0.495228	0.620439	0.999943
ENSMUSG00000001120	Pcbp3	1781.64	0.143851	0.1172	1.2274	0.219673	0.999943
ENSMUSG00000001123	Lgals9	1.14033	1.83286	2.4856	0.737393	0.460883	NA
ENSMUSG00000001127	Araf	3253.98	-0.0950552	0.134448	-0.707006	0.479563	0.999943
ENSMUSG00000001128	Cfp	63.7502	0.0321285	0.494826	0.064929	0.948231	0.999943
ENSMUSG00000001131	Timp1	6.02945	0.42709	0.840613	0.50807	0.611405	0.999943
ENSMUSG00000001134	Uxt	70.0912	0.220913	0.277449	0.79623	0.425898	0.999943
ENSMUSG00000001138	Cnnm3	762.757	-0.0958597	0.144395	-0.663871	0.506773	0.999943
ENSMUSG00000001143	Lman2l	1501.6	0.159989	0.107443	1.48906	0.136472	0.999943
ENSMUSG00000001150	Mcm3ap	1472.75	0.247163	0.113304	2.18142	0.0291522	0.999943
ENSMUSG00000001151	Pcnt	300.184	0.0131025	0.322858	0.0405829	0.967628	0.999943
ENSMUSG00000001155	Ftcd	0.871543	0.862474	2.36504	0.364676	0.715353	NA
ENSMUSG00000001156	Mxd1	316.626	-0.0587031	0.292199	-0.200901	0.840776	0.999943
ENSMUSG00000001157	Gmcl1	770.382	0.0502966	0.104162	0.482871	0.629187	0.999943
ENSMUSG00000001158	Snrnp27	485.705	-0.153008	0.218152	-0.701385	0.483063	0.999943
ENSMUSG00000001166	Oas1c	23.803	-0.408085	0.678628	-0.601338	0.547615	0.999943
ENSMUSG00000001173	Ocrl	1433.18	-0.0433884	0.0957611	-0.45309	0.650484	0.999943
ENSMUSG00000001175	Calm1	61743	-0.225783	0.129984	-1.737	0.0823867	0.999943
ENSMUSG00000001211	Agpat3	8097.41	0.0127479	0.09613	0.132611	0.894501	0.999943
ENSMUSG00000001225	Slc26a3	2.24757	-2.14466	1.76137	-1.21761	0.223373	NA
ENSMUSG00000001227	Sema6b	3982.15	0.0998317	0.0899032	1.11043	0.266812	0.999943
ENSMUSG00000001228	Uhrf1	74.2572	0.075297	0.307884	0.244562	0.806795	0.999943
ENSMUSG00000001229	Dpp9	1142.1	0.000502611	0.106908	0.00470134	0.996249	0.999943
ENSMUSG00000001240	Ramp2	168.11	0.150621	0.248913	0.605114	0.545103	0.999943
ENSMUSG00000001247	Lsr	22.5451	0.094075	0.536744	0.17527	0.860868	0.999943
ENSMUSG00000001248	Gramd1a	3789.08	0.115506	0.122591	0.942204	0.346088	0.999943
ENSMUSG00000001249	Hpn	1.24958	-1.94124	2.14611	-0.904542	0.365708	NA
ENSMUSG00000001260	Gabrg1	1082.07	0.1704	0.168226	1.01292	0.311099	0.999943
ENSMUSG00000001270	Ckb	13259.9	-0.0253053	0.10023	-0.252472	0.800676	0.999943
ENSMUSG00000001280	Sp1	570.378	-0.955131	0.66676	-1.4325	0.152002	0.999943
ENSMUSG00000001281	Itgb7	10.9879	1.65821	0.88415	1.87548	0.0607261	0.999943
ENSMUSG00000001285	Myg1	360.793	0.101943	0.174747	0.583377	0.559639	0.999943
ENSMUSG00000001288	Rarg	149.422	-0.0372439	0.191469	-0.194517	0.845771	0.999943
ENSMUSG00000001289	Pfdn5	2122.92	-0.00533069	0.128859	-0.0413684	0.967002	0.999943
ENSMUSG00000001300	Efnb2	4124.12	-0.148494	0.0954759	-1.5553	0.119875	0.999943
ENSMUSG00000001305	Rrp15	184.369	0.137702	0.194254	0.708878	0.4784	0.999943
ENSMUSG00000001313	Rnd2	883.392	-0.108313	0.151602	-0.714455	0.474946	0.999943
ENSMUSG00000001323	Srr	2971.41	0.113287	0.112451	1.00743	0.313729	0.999943
ENSMUSG00000001333	Sync	8.04659	0.0671048	0.78234	0.0857745	0.931646	0.999943
ENSMUSG00000001334	Fndc5	407.308	0.162747	0.141409	1.15089	0.249776	0.999943
ENSMUSG00000001348	Acp5	3.98994	0.653466	1.41777	0.460912	0.644862	0.999943
ENSMUSG00000001349	Cnn1	8.6057	0.439059	0.851959	0.515352	0.606307	0.999943
ENSMUSG00000001366	Fbxo9	1909.81	-0.0865255	0.142211	-0.60843	0.542903	0.999943
ENSMUSG00000001376	Vps50	1742.24	0.0222608	0.143489	0.15514	0.876711	0.999943
ENSMUSG00000001380	Hars	2818.05	-0.021952	0.104634	-0.209798	0.833825	0.999943
ENSMUSG00000001383	Zmat2	2876.27	0.000973393	0.132467	0.00734817	0.994137	0.999943
ENSMUSG00000001403	Ube2c	44.5255	-0.037908	0.348777	-0.108688	0.91345	0.999943
ENSMUSG00000001415	Smg5	2260.71	-0.0172859	0.0945297	-0.182862	0.854907	0.999943
ENSMUSG00000001416	Cct3	4104.81	0.0916154	0.149375	0.613324	0.539662	0.999943
ENSMUSG00000001418	Glmp	659.524	0.0567168	0.138401	0.409801	0.681952	0.999943
ENSMUSG00000001419	Mef2d	4421.87	-0.00374953	0.0933005	-0.0401877	0.967944	0.999943
ENSMUSG00000001420	Tmem79	10.2552	0.0245376	0.654764	0.0374755	0.970106	0.999943
ENSMUSG00000001424	Snd1	2859.11	-0.111054	0.144902	-0.766408	0.443433	0.999943
ENSMUSG00000001435	Col18a1	139.428	0.0334081	0.266851	0.125194	0.90037	0.999943
ENSMUSG00000001436	Slc19a1	607.169	-0.159882	0.202613	-0.789101	0.430053	0.999943
ENSMUSG00000001440	Kpnb1	6689.69	-0.103346	0.129107	-0.800467	0.42344	0.999943
ENSMUSG00000001441	Npepps	4839.34	-0.132193	0.106934	-1.23621	0.216382	0.999943
ENSMUSG00000001444	Tbx21	7.51894	0.613079	1.01443	0.604359	0.545605	0.999943
ENSMUSG00000001445	Mrpl10	1285.96	0.000957324	0.145041	0.00660036	0.994734	0.999943
ENSMUSG00000001467	Cyp51	8477.35	-0.162833	0.0871722	-1.86795	0.0617692	0.999943
ENSMUSG00000001472	Tcf25	10675.5	-0.0530565	0.110801	-0.478847	0.632048	0.999943
ENSMUSG00000001473	Tubb6	105.577	0.302184	0.267554	1.12943	0.258715	0.999943
ENSMUSG00000001482	Def8	1745.39	0.109799	0.0916765	1.19768	0.231042	0.999943
ENSMUSG00000001493	Meox1	24.1078	-0.0767952	0.450064	-0.170632	0.864513	0.999943
ENSMUSG00000001494	Sost	1.81122	0.880968	1.70846	0.515652	0.606098	NA
ENSMUSG00000001496	Nkx2-1	2.19446	-0.428315	1.35379	-0.316382	0.751713	NA
ENSMUSG00000001506	Col1a1	17.9308	0.672015	0.616901	1.08934	0.276004	0.999943
ENSMUSG00000001507	Itga3	962.606	-0.176772	0.17987	-0.982779	0.325716	0.999943
ENSMUSG00000001508	Sgca	9.43428	1.31932	1.28333	1.02804	0.303929	0.999943
ENSMUSG00000001510	Dlx3	1.32099	-0.579179	1.85127	-0.312856	0.75439	NA
ENSMUSG00000001517	Foxm1	77.2962	-0.468745	0.328548	-1.42672	0.153661	0.999943
ENSMUSG00000001518	Itfg2	335.794	0.263796	0.172665	1.52779	0.126565	0.999943
ENSMUSG00000001520	Nrip2	108.867	0.324775	0.21777	1.49137	0.135864	0.999943
ENSMUSG00000001521	Tulp3	506.854	0.244259	0.149406	1.63486	0.102078	0.999943
ENSMUSG00000001524	Gtf2h4	326.633	-0.0038299	0.293751	-0.0130379	0.989598	0.999943
ENSMUSG00000001525	Tubb5	39328.7	0.00714593	0.105016	0.068046	0.945749	0.999943
ENSMUSG00000001542	Ell2	135.975	-0.979842	0.282802	-3.46477	0.000530689	0.208189
ENSMUSG00000001552	Jup	1524.29	-0.0783411	0.15561	-0.503444	0.614652	0.999943
ENSMUSG00000001555	Fkbp10	232.201	0.245901	0.22584	1.08883	0.276231	0.999943
ENSMUSG00000001558	Klhl10	27.0937	-0.172299	0.410106	-0.420132	0.674389	0.999943
ENSMUSG00000001569	Nom1	535.856	0.0696795	0.117282	0.594118	0.552433	0.999943
ENSMUSG00000001576	Ergic1	4741.85	0.050508	0.087027	0.580372	0.561664	0.999943
ENSMUSG00000001583	Tnk1	2.21151	1.66473	1.83279	0.908305	0.363717	NA
ENSMUSG00000001588	Acap1	2.19721	-1.84201	1.47073	-1.25245	0.210406	NA
ENSMUSG00000001604	Tcea3	6.66332	0.847995	0.843774	1.005	0.314895	0.999943
ENSMUSG00000001622	Csn3	1.09286	-2.21751	2.20892	-1.00389	0.315434	NA
ENSMUSG00000001627	Ifrd1	1345.52	-0.307004	0.116818	-2.62805	0.00858768	0.783238
ENSMUSG00000001630	Stk38l	418.071	0.00675359	0.135842	0.0497164	0.960348	0.999943
ENSMUSG00000001632	Brpf1	565.72	-0.0611096	0.13145	-0.464889	0.642011	0.999943
ENSMUSG00000001642	Akr1b3	1671.17	0.172137	0.122105	1.40975	0.158614	0.999943
ENSMUSG00000001663	Gstt1	41.3626	0.119046	0.35825	0.332299	0.739664	0.999943
ENSMUSG00000001665	Gstt3	16.3912	0.693209	0.69301	1.00029	0.317172	0.999943
ENSMUSG00000001666	Ddt	316.109	0.152808	0.150178	1.01751	0.30891	0.999943
ENSMUSG00000001672	Marveld3	1.69413	-0.173895	1.64691	-0.105588	0.915909	NA
ENSMUSG00000001674	Ddx18	521.708	-0.134263	0.124414	-1.07916	0.280516	0.999943
ENSMUSG00000001687	Ubl3	1873.68	0.0323005	0.0987118	0.32722	0.743502	0.999943
ENSMUSG00000001700	Gramd3	359.211	0.100825	0.13236	0.761744	0.446213	0.999943
ENSMUSG00000001707	Eef1e1	1127.84	0.0703161	0.201589	0.34881	0.727232	0.999943
ENSMUSG00000001729	Akt1	4583.27	0.013023	0.101832	0.127887	0.898239	0.999943
ENSMUSG00000001739	Cldn15	0.931855	-2.06703	2.34542	-0.881302	0.378154	NA
ENSMUSG00000001741	Il16	29.7608	-0.994676	0.603962	-1.64692	0.099575	0.999943
ENSMUSG00000001750	Tcirg1	88.9731	0.152952	0.29057	0.526385	0.598621	0.999943
ENSMUSG00000001751	Naglu	328.756	0.266278	0.170375	1.5629	0.118077	0.999943
ENSMUSG00000001755	Coasy	891.747	0.0397437	0.12872	0.308761	0.757503	0.999943
ENSMUSG00000001761	Smo	556.073	0.0290238	0.133474	0.217449	0.827859	0.999943
ENSMUSG00000001763	Tspan33	420.897	0.0403512	0.15645	0.257918	0.79647	0.999943
ENSMUSG00000001767	Crnkl1	405.124	-0.0672054	0.141365	-0.475403	0.6345	0.999943
ENSMUSG00000001768	Rin2	207.877	0.14075	0.240373	0.585548	0.558179	0.999943
ENSMUSG00000001773	Folh1	32.1605	-0.0281763	0.481066	-0.0585707	0.953294	0.999943
ENSMUSG00000001774	Chordc1	1298.56	-0.262096	0.116343	-2.25279	0.0242723	0.999943
ENSMUSG00000001783	Rtcb	2784.63	0.00179748	0.125396	0.0143345	0.988563	0.999943
ENSMUSG00000001785	Pwp1	942.085	0.0661412	0.135869	0.486801	0.626399	0.999943
ENSMUSG00000001786	Fbxo7	2042.91	0.0879131	0.163721	0.53697	0.591288	0.999943
ENSMUSG00000001794	Capns1	3564.54	0.159152	0.112423	1.41565	0.156878	0.999943
ENSMUSG00000001802	Lrp3	3013.91	0.0656946	0.0923447	0.711407	0.476832	0.999943
ENSMUSG00000001804	Dsg4	0.645583	0.218012	2.95112	0.0738744	0.94111	NA
ENSMUSG00000001827	Folr1	39.6022	0.153702	0.42501	0.361643	0.717619	0.999943
ENSMUSG00000001829	Clpb	1893.67	-0.0631568	0.114105	-0.553495	0.579924	0.999943
ENSMUSG00000001833	Septin7	6539.01	0.022894	0.0856695	0.267236	0.789287	0.999943
ENSMUSG00000001844	Zdhhc4	514.312	0.0196625	0.140655	0.139792	0.888824	0.999943
ENSMUSG00000001847	Rac1	7400.95	-0.0286518	0.0835603	-0.342888	0.731683	0.999943
ENSMUSG00000001855	Nup214	912.81	0.145739	0.266762	0.546327	0.584841	0.999943
ENSMUSG00000001864	Aif1l	288.097	0.596672	0.212218	2.8116	0.00492951	0.586429
ENSMUSG00000001865	Cpa3	0.686555	-2.47864	2.89847	-0.855156	0.392465	NA
ENSMUSG00000001870	Ltbp1	40.2903	0.1738	0.418593	0.415201	0.677994	0.999943
ENSMUSG00000001891	Ugp2	1603.37	0.203965	0.12287	1.66001	0.0969129	0.999943
ENSMUSG00000001901	Kcnh6	55.9525	0.0768651	0.33043	0.232622	0.816055	0.999943
ENSMUSG00000001909	Trmt1	993.119	-0.0409178	0.173818	-0.235406	0.813893	0.999943
ENSMUSG00000001910	Nacc1	2725.49	0.0544728	0.0923866	0.589618	0.555447	0.999943
ENSMUSG00000001911	Nfix	8308.69	0.0685553	0.0980637	0.699089	0.484496	0.999943
ENSMUSG00000001918	Slc1a5	296.261	0.265528	0.187401	1.4169	0.156512	0.999943
ENSMUSG00000001924	Uba1	12372.1	0.0563721	0.0989071	0.56995	0.568711	0.999943
ENSMUSG00000001930	Vwf	7.22139	1.26496	1.06575	1.18692	0.235261	0.999943
ENSMUSG00000001942	Siae	577.103	-0.0450333	0.119521	-0.376783	0.706335	0.999943
ENSMUSG00000001943	Vsig2	76.9768	0.143765	0.260428	0.552032	0.580926	0.999943
ENSMUSG00000001946	Esam	9.31232	-1.83013	0.948626	-1.92924	0.053701	0.999943
ENSMUSG00000001948	Spa17	22.8031	0.0816257	0.58407	0.139753	0.888855	0.999943
ENSMUSG00000001962	Fam50a	807.518	-0.0907548	0.141216	-0.642668	0.52044	0.999943
ENSMUSG00000001964	Emd	1427.18	0.148224	0.116018	1.2776	0.20139	0.999943
ENSMUSG00000001983	Taco1	374.309	0.0312649	0.132794	0.235439	0.813868	0.999943
ENSMUSG00000001985	Grik3	2285.06	-0.0444956	0.112623	-0.395086	0.692779	0.999943
ENSMUSG00000001986	Gria3	2106.31	-0.0139559	0.192785	-0.0723911	0.942291	0.999943
ENSMUSG00000001988	Npas1	125.571	0.0543075	0.218047	0.249063	0.803312	0.999943
ENSMUSG00000001995	Sipa1l2	1461.07	0.032506	0.108685	0.299083	0.764877	0.999943
ENSMUSG00000001998	Ap4e1	298.79	-0.325775	0.269658	-1.2081	0.227007	0.999943
ENSMUSG00000001999	Blvra	201.804	0.182226	0.213973	0.851631	0.394419	0.999943
ENSMUSG00000002006	Pdzd4	4818.96	-0.0201792	0.099079	-0.203668	0.838613	0.999943
ENSMUSG00000002007	Srpk3	3.31117	1.25995	1.35532	0.929637	0.352559	0.999943
ENSMUSG00000002010	Idh3g	2153.82	-0.102221	0.174282	-0.586528	0.557521	0.999943
ENSMUSG00000002012	Pnck	1322.23	-0.0260192	0.0962405	-0.270356	0.786886	0.999943
ENSMUSG00000002014	Ssr4	643.358	0.0217903	0.158383	0.13758	0.890573	0.999943
ENSMUSG00000002015	Bcap31	1256.06	0.0859816	0.101906	0.843732	0.398819	0.999943
ENSMUSG00000002017	Fam98a	1149.65	0.0187937	0.0963432	0.19507	0.845338	0.999943
ENSMUSG00000002020	Ltbp2	4.70475	1.6016	1.12884	1.41879	0.155959	0.999943
ENSMUSG00000002028	Kmt2a	2267.18	-0.0104112	0.2391	-0.0435433	0.965268	0.999943
ENSMUSG00000002031	Ift46	885.942	-0.0987933	0.145459	-0.679183	0.497022	0.999943
ENSMUSG00000002032	Tmem25	530.766	0.13196	0.136081	0.969717	0.332188	0.999943
ENSMUSG00000002043	Trappc6a	244.549	-0.102589	0.165589	-0.619542	0.53556	0.999943
ENSMUSG00000002052	Supt6	3564.45	0.035214	0.0979618	0.359467	0.719246	0.999943
ENSMUSG00000002055	Spag5	95.7147	0.323706	0.479323	0.67534	0.49946	0.999943
ENSMUSG00000002058	Unc119	1090.22	0.0473154	0.120818	0.391624	0.695336	0.999943
ENSMUSG00000002059	Rab34	351.843	-0.0844243	0.202175	-0.417579	0.676255	0.999943
ENSMUSG00000002064	Sdf2	981.191	-0.034698	0.156019	-0.222397	0.824005	0.999943
ENSMUSG00000002068	Ccne1	322.151	0.139485	0.250023	0.557888	0.576921	0.999943
ENSMUSG00000002076	Hsf2bp	9.03963	1.34535	0.951297	1.41423	0.157294	0.999943
ENSMUSG00000002083	Bbc3	1318.9	0.113605	0.137246	0.827748	0.407813	0.999943
ENSMUSG00000002102	Psmc3	2963.21	0.0184643	0.11746	0.157196	0.87509	0.999943
ENSMUSG00000002103	Acp2	2256.97	-0.43953	0.169249	-2.59694	0.00940575	0.816344
ENSMUSG00000002104	Rapsn	2.95011	0.00439487	1.39318	0.00315455	0.997483	NA
ENSMUSG00000002105	Slc39a13	370.576	-0.0219607	0.209038	-0.105056	0.916331	0.999943
ENSMUSG00000002107	Celf2	15913.3	-0.127076	0.217353	-0.584656	0.558779	0.999943
ENSMUSG00000002108	Nr1h3	12.4622	0.623726	0.766003	0.81426	0.415496	0.999943
ENSMUSG00000002109	Ddb2	180.281	-0.048572	0.17948	-0.270626	0.786679	0.999943
ENSMUSG00000002129	Sf3a1	2878.85	-0.0187513	0.0993662	-0.188709	0.850321	0.999943
ENSMUSG00000002147	Stat6	18.9742	1.25716	0.900708	1.39575	0.162791	0.999943
ENSMUSG00000002190	Clgn	409.725	0.119376	0.146768	0.813367	0.416007	0.999943
ENSMUSG00000002204	Napsa	4.25456	-0.793327	1.3253	-0.5986	0.549439	0.999943
ENSMUSG00000002205	Vrk3	612.923	0.0707076	0.160732	0.439911	0.660001	0.999943
ENSMUSG00000002210	Smg9	740.197	-0.0470654	0.182665	-0.25766	0.796669	0.999943
ENSMUSG00000002221	Paxip1	1084.05	-0.0686005	0.155143	-0.442176	0.658362	0.999943
ENSMUSG00000002222	Rmnd5a	3847.91	0.00129548	0.0920343	0.0140761	0.988769	0.999943
ENSMUSG00000002227	Mov10	108.169	0.584725	0.251221	2.32753	0.0199373	0.999943
ENSMUSG00000002228	Ppm1j	16.8008	0.483544	0.657039	0.735944	0.461765	0.999943
ENSMUSG00000002233	Rhoc	282.691	0.275272	0.164751	1.67084	0.0947533	0.999943
ENSMUSG00000002249	Tead3	79.8733	0.19412	0.498899	0.389098	0.697204	0.999943
ENSMUSG00000002250	Ppard	387.275	-0.0699717	0.148971	-0.469699	0.63857	0.999943
ENSMUSG00000002257	Def6	52.1145	-0.247009	0.341484	-0.723342	0.46947	0.999943
ENSMUSG00000002265	Peg3	4567.03	-0.117999	0.157778	-0.747878	0.454534	0.999943
ENSMUSG00000002266	Zim1	512.101	-0.0545728	0.25497	-0.214036	0.830519	0.999943
ENSMUSG00000002274	Metrn	1373.43	0.0914816	0.123511	0.740677	0.458889	0.999943
ENSMUSG00000002279	Lmf1	388.359	0.0215993	0.137567	0.157009	0.875238	0.999943
ENSMUSG00000002280	Ciao3	464.671	-0.134673	0.319394	-0.421651	0.67328	0.999943
ENSMUSG00000002289	Angptl4	105.021	0.120985	0.341648	0.354122	0.723247	0.999943
ENSMUSG00000002297	Dbf4	121.806	0.242161	0.255454	0.947965	0.343147	0.999943
ENSMUSG00000002307	Daxx	625.207	0.111633	0.127136	0.878063	0.37991	0.999943
ENSMUSG00000002308	Cd320	211.776	0.204856	0.177074	1.1569	0.247314	0.999943
ENSMUSG00000002319	Ipo4	2756.86	0.0924215	0.0987469	0.935943	0.349303	0.999943
ENSMUSG00000002320	Tm9sf1	897.873	-0.00422345	0.13723	-0.0307764	0.975448	0.999943
ENSMUSG00000002324	Rec8	23.3581	0.104315	0.452507	0.230526	0.817683	0.999943
ENSMUSG00000002325	Irf9	154.025	0.00100864	0.195335	0.00516366	0.99588	0.999943
ENSMUSG00000002326	Gmpr2	519.436	0.0817539	0.130341	0.627229	0.530509	0.999943
ENSMUSG00000002329	Mdp1	1188.7	0.00810807	0.117423	0.0690503	0.94495	0.999943
ENSMUSG00000002332	Dhrs1	1509.4	0.293463	0.116572	2.51744	0.0118211	0.889077
ENSMUSG00000002341	Ncan	21209.7	0.106293	0.109591	0.969906	0.332094	0.999943
ENSMUSG00000002342	Tmem161a	956.168	0.1884	0.237385	0.793647	0.427401	0.999943
ENSMUSG00000002343	Armc6	1789.61	-0.105185	0.116688	-0.901417	0.367366	0.999943
ENSMUSG00000002345	Borcs8	427.875	-0.0334307	0.134874	-0.247867	0.804237	0.999943
ENSMUSG00000002346	Slc25a42	564.412	0.130189	0.141044	0.923037	0.355988	0.999943
ENSMUSG00000002365	Snx9	209.679	-0.111159	0.160939	-0.690685	0.489763	0.999943
ENSMUSG00000002372	Ranbp3	1859.59	-0.000679574	0.0952232	-0.00713664	0.994306	0.999943
ENSMUSG00000002379	Ndufa11	1019.31	0.236849	0.129865	1.82381	0.0681808	0.999943
ENSMUSG00000002384	Bmp8b	11.4997	0.610727	0.631744	0.966732	0.333678	0.999943
ENSMUSG00000002393	Nr2f6	691.744	0.113161	0.207246	0.546024	0.585049	0.999943
ENSMUSG00000002395	Use1	889.903	0.0447089	0.14271	0.313284	0.754065	0.999943
ENSMUSG00000002396	Ocel1	319.307	0.0272318	0.204484	0.133174	0.894056	0.999943
ENSMUSG00000002409	Dyrk1b	299.921	0.110389	0.148926	0.741233	0.458552	0.999943
ENSMUSG00000002413	Braf	2382.5	-0.271174	0.459989	-0.589522	0.555511	0.999943
ENSMUSG00000002416	Ndufb2	830.78	0.0835926	0.184367	0.453404	0.650258	0.999943
ENSMUSG00000002428	Hltf	553.706	-0.106365	0.147975	-0.718805	0.472261	0.999943
ENSMUSG00000002455	Prpf6	1373.33	-0.168203	0.114244	-1.47231	0.140937	0.999943
ENSMUSG00000002458	Rgs19	582.629	0.14478	0.152926	0.946734	0.343774	0.999943
ENSMUSG00000002459	Rgs20	495.477	-0.015339	0.141485	-0.108414	0.913667	0.999943
ENSMUSG00000002475	Abhd3	359.277	0.141113	0.142708	0.988818	0.322752	0.999943
ENSMUSG00000002477	Snrpd1	687.22	0.0228272	0.126522	0.180421	0.856822	0.999943
ENSMUSG00000002486	Tchp	261.534	0.0427685	0.231881	0.184442	0.853667	0.999943
ENSMUSG00000002489	Tiam1	1790.57	-0.22117	0.271854	-0.813563	0.415895	0.999943
ENSMUSG00000002496	Tsc2	2903.85	0.101706	0.239526	0.424612	0.67112	0.999943
ENSMUSG00000002500	Rpl3l	2.30693	-1.39433	1.49741	-0.93116	0.351771	NA
ENSMUSG00000002504	Slc9a3r2	935.939	0.0387255	0.125117	0.309514	0.756931	0.999943
ENSMUSG00000002524	Puf60	2763.58	0.0313177	0.123815	0.25294	0.800315	0.999943
ENSMUSG00000002546	Golga2	2200.49	-0.0980797	0.106821	-0.918167	0.358531	0.999943
ENSMUSG00000002550	Uck1	1438.23	0.0721761	0.096578	0.747335	0.454861	0.999943
ENSMUSG00000002565	Scin	0.803711	1.95009	2.68797	0.725489	0.468152	NA
ENSMUSG00000002578	Ikzf4	784.151	0.0907125	0.187546	0.483682	0.628611	0.999943
ENSMUSG00000002580	Mien1	1496.8	-0.0270049	0.129743	-0.208141	0.835119	0.999943
ENSMUSG00000002602	Axl	839.065	-0.258219	0.229342	-1.12591	0.260203	0.999943
ENSMUSG00000002603	Tgfb1	8.16549	0.483503	0.751556	0.643336	0.520006	0.999943
ENSMUSG00000002608	Ccdc97	949.347	0.119321	0.15476	0.771006	0.440703	0.999943
ENSMUSG00000002617	Zfp40	690.6	-0.0385993	0.284679	-0.135589	0.892146	0.999943
ENSMUSG00000002625	Akap8l	1091.71	0.0373627	0.0991644	0.376776	0.70634	0.999943
ENSMUSG00000002633	Shh	25.3018	-0.0736036	0.532313	-0.138271	0.890026	0.999943
ENSMUSG00000002635	Pdcd2l	404.841	-0.025167	0.193444	-0.1301	0.896488	0.999943
ENSMUSG00000002658	Gtf2f1	1614.75	-0.0281278	0.127087	-0.221327	0.824838	0.999943
ENSMUSG00000002660	Clpp	972.666	0.0331209	0.181141	0.182846	0.854919	0.999943
ENSMUSG00000002661	Alkbh7	280.019	0.122032	0.160097	0.762237	0.445918	0.999943
ENSMUSG00000002664	Pspn	6.57784	0.0644154	0.787992	0.0817462	0.934849	0.999943
ENSMUSG00000002668	Dennd1c	7.25792	0.0491262	1.17424	0.0418367	0.966629	0.999943
ENSMUSG00000002679	Med6	267.303	-0.0138799	0.214091	-0.064832	0.948308	0.999943
ENSMUSG00000002688	Prkd1	300.55	0.149536	0.155754	0.960075	0.337018	0.999943
ENSMUSG00000002699	Lcp2	156.712	-0.655898	0.351132	-1.86795	0.0617686	0.999943
ENSMUSG00000002718	Cse1l	2409.83	0.0452783	0.102857	0.440207	0.659788	0.999943
ENSMUSG00000002728	Naa20	820.297	-0.110518	0.148888	-0.742289	0.457912	0.999943
ENSMUSG00000002731	Prkra	1130.02	0.106482	0.112757	0.944347	0.344993	0.999943
ENSMUSG00000002732	Fkbp7	21.6725	0.550698	0.451069	1.22087	0.222133	0.999943
ENSMUSG00000002733	Plekha3	543.169	0.0451161	0.12728	0.354463	0.722992	0.999943
ENSMUSG00000002741	Ykt6	4639.8	0.0153618	0.120662	0.127313	0.898693	0.999943
ENSMUSG00000002748	Baz1b	1829.81	0.0225875	0.111668	0.202273	0.839703	0.999943
ENSMUSG00000002763	Pex6	1379.2	0.00493838	0.111712	0.0442063	0.96474	0.999943
ENSMUSG00000002767	Mrpl2	535.378	-0.0217558	0.27364	-0.0795054	0.936631	0.999943
ENSMUSG00000002768	Mea1	1783.83	0.0977212	0.118044	0.827836	0.407764	0.999943
ENSMUSG00000002769	Gnmt	3.15818	0.704447	1.2091	0.582619	0.56015	0.999943
ENSMUSG00000002771	Grin2d	780.178	0.184736	0.131384	1.40608	0.1597	0.999943
ENSMUSG00000002778	Kdelr1	1785.64	0.0416866	0.0891579	0.46756	0.6401	0.999943
ENSMUSG00000002781	Tmem143	552.773	0.266506	0.209625	1.27135	0.203605	0.999943
ENSMUSG00000002791	Pdxk-ps	1.58325	-0.637337	1.66265	-0.383326	0.701478	NA
ENSMUSG00000002797	Ggct	290.835	0.0179906	0.191168	0.0941089	0.925023	0.999943
ENSMUSG00000002799	Jag2	1044.58	-0.147176	0.116327	-1.26519	0.205801	0.999943
ENSMUSG00000002803	Btbd6	742.12	0.208453	0.145803	1.42969	0.152806	0.999943
ENSMUSG00000002804	Nudt14	315.183	-0.0244779	0.204636	-0.119617	0.904787	0.999943
ENSMUSG00000002808	Epdr1	1322.05	0.224584	0.126232	1.77914	0.0752167	0.999943
ENSMUSG00000002812	Flii	1530.46	-0.017512	0.16722	-0.104725	0.916594	0.999943
ENSMUSG00000002814	Top3a	82.8934	0.0696814	0.267563	0.26043	0.794532	0.999943
ENSMUSG00000002820	Atg4d	421.462	-0.0279306	0.162243	-0.172153	0.863317	0.999943
ENSMUSG00000002825	Qtrt1	247.066	0.245952	0.205705	1.19565	0.231832	0.999943
ENSMUSG00000002831	Plin4	5.35582	0.0756034	1.03861	0.072793	0.941971	0.999943
ENSMUSG00000002833	Hdgfl2	1467.62	-0.0866469	0.105418	-0.821934	0.411114	0.999943
ENSMUSG00000002835	Chaf1a	204.786	0.050516	0.312366	0.161721	0.871526	0.999943
ENSMUSG00000002844	Adprh	2015.21	-0.0952766	0.158055	-0.602805	0.546638	0.999943
ENSMUSG00000002845	Tmem39a	156.577	-0.0207919	0.294595	-0.0705778	0.943734	0.999943
ENSMUSG00000002846	Timmdc1	431.553	-0.020399	0.13155	-0.155066	0.876769	0.999943
ENSMUSG00000002847	Pla1a	1.2846	2.96482	2.47302	1.19887	0.23058	NA
ENSMUSG00000002870	Mcm2	299.389	0.242364	0.251717	0.962845	0.335625	0.999943
ENSMUSG00000002871	Tpra1	400.256	0.0519033	0.241188	0.215198	0.829613	0.999943
ENSMUSG00000002881	Nab1	761.144	-0.093405	0.191749	-0.487122	0.626172	0.999943
ENSMUSG00000002885	Adgre5	43.167	0.103847	0.567363	0.183034	0.854771	0.999943
ENSMUSG00000002897	Il17ra	88.585	-0.509987	0.346055	-1.47372	0.140557	0.999943
ENSMUSG00000002900	Lamb1	802.105	0.350362	0.174388	2.0091	0.0445268	0.999943
ENSMUSG00000002908	Kcnn1	646.927	-0.10153	0.177506	-0.571979	0.567336	0.999943
ENSMUSG00000002910	Arrdc2	448.004	-0.105939	0.197785	-0.535628	0.592216	0.999943
ENSMUSG00000002930	Ppp1r17	3.60808	-0.0769827	1.10951	-0.0693845	0.944684	0.999943
ENSMUSG00000002944	Cd36	198.545	-0.364624	0.222549	-1.6384	0.101338	0.999943
ENSMUSG00000002948	Map2k7	992.004	-0.0105065	0.185101	-0.0567609	0.954736	0.999943
ENSMUSG00000002949	Timm44	771.161	-0.0694307	0.200913	-0.345577	0.729661	0.999943
ENSMUSG00000002957	Ap2a2	9539.42	-0.0287992	0.0929139	-0.309956	0.756594	0.999943
ENSMUSG00000002963	Pnkp	427.944	-0.0593232	0.227916	-0.260285	0.794644	0.999943
ENSMUSG00000002968	Med25	1843.96	0.0350651	0.116444	0.301133	0.763313	0.999943
ENSMUSG00000002980	Bcam	86.4671	0.663061	0.450991	1.47023	0.141499	0.999943
ENSMUSG00000002981	Clptm1	4953.31	0.106022	0.0944021	1.12309	0.2614	0.999943
ENSMUSG00000002983	Relb	84.7398	0.0942482	0.266866	0.353167	0.723963	0.999943
ENSMUSG00000002984	Tomm40	1785.04	-0.0126187	0.175615	-0.0718547	0.942718	0.999943
ENSMUSG00000002985	Apoe	23840.2	0.099272	0.164021	0.605239	0.54502	0.999943
ENSMUSG00000002996	Hbp1	483.432	0.0294408	0.141544	0.207997	0.835231	0.999943
ENSMUSG00000002997	Prkar2b	6003.24	-0.00204727	0.0860522	-0.023791	0.981019	0.999943
ENSMUSG00000003031	Cdkn1b	1927.65	0.0191094	0.111298	0.171696	0.863677	0.999943
ENSMUSG00000003032	Klf4	59.7596	-0.138423	0.5003	-0.27668	0.782026	0.999943
ENSMUSG00000003033	Ap1m1	2590.59	-0.227477	0.114373	-1.98891	0.0467116	0.999943
ENSMUSG00000003037	Rab8a	1045.84	-0.00961642	0.147055	-0.0653931	0.947861	0.999943
ENSMUSG00000003038	Hmgn2	3910.74	0.0478567	0.112804	0.424245	0.671387	0.999943
ENSMUSG00000003039	Fam32a	2185.37	-0.15403	0.104123	-1.47931	0.139058	0.999943
ENSMUSG00000003062	Stard3nl	1666.72	0.0208146	0.122652	0.169704	0.865243	0.999943
ENSMUSG00000003068	Stk11	1594.23	0.219764	0.107405	2.04612	0.0407449	0.999943
ENSMUSG00000003070	Efna2	379.727	0.0171825	0.156918	0.1095	0.912806	0.999943
ENSMUSG00000003072	Atp5d	4065.81	0.0356842	0.135288	0.263765	0.791961	0.999943
ENSMUSG00000003099	Ppp5c	2495.6	0.034193	0.0923072	0.370427	0.711065	0.999943
ENSMUSG00000003119	Cdk12	609.819	0.254813	0.218779	1.16471	0.244137	0.999943
ENSMUSG00000003123	Lipe	242.619	0.00674992	0.261036	0.0258582	0.97937	0.999943
ENSMUSG00000003131	Pafah1b2	6126.19	-0.03624	0.126722	-0.285981	0.774893	0.999943
ENSMUSG00000003134	Tbc1d8	442.618	-0.23217	0.163981	-1.41584	0.156823	0.999943
ENSMUSG00000003135	Cnot11	687.822	0.196909	0.177762	1.10771	0.267985	0.999943
ENSMUSG00000003153	Slc2a3	5511.12	-0.074644	0.130274	-0.572977	0.56666	0.999943
ENSMUSG00000003154	Foxj2	1434.45	0.0916303	0.159771	0.573509	0.5663	0.999943
ENSMUSG00000003161	Sri	1142.71	0.0611953	0.133465	0.458511	0.646585	0.999943
ENSMUSG00000003166	Dgcr2	5125.42	0.0165091	0.0966579	0.170799	0.864382	0.999943
ENSMUSG00000003184	Irf3	179.089	0.0891429	0.262599	0.339464	0.73426	0.999943
ENSMUSG00000003190	Bcl2l12	26.9734	0.543965	0.432782	1.2569	0.208789	0.999943
ENSMUSG00000003198	Zfp959	118.087	-0.066906	0.209054	-0.320042	0.748936	0.999943
ENSMUSG00000003199	Mpnd	1468.03	-0.0168965	0.12287	-0.137515	0.890624	0.999943
ENSMUSG00000003200	Sh3gl1	1303.08	0.0985481	0.106454	0.925731	0.354586	0.999943
ENSMUSG00000003206	Ebi3	31.8584	-0.0790845	0.384538	-0.205661	0.837056	0.999943
ENSMUSG00000003208	Yju2	181.785	0.183806	0.229978	0.79923	0.424157	0.999943
ENSMUSG00000003226	Ranbp2	2335.84	-0.125992	0.180574	-0.697733	0.485344	0.999943
ENSMUSG00000003227	Edar	6.42984	-0.464989	0.804374	-0.578076	0.563213	0.999943
ENSMUSG00000003228	Grk5	299.199	0.128144	0.155166	0.825852	0.408888	0.999943
ENSMUSG00000003233	Dvl3	2875.47	0.098682	0.0980775	1.00616	0.314337	0.999943
ENSMUSG00000003234	Abcf3	1338.59	-0.215223	0.119786	-1.79673	0.0723782	0.999943
ENSMUSG00000003235	Eif2b5	2153.93	0.00910604	0.0951473	0.0957047	0.923755	0.999943
ENSMUSG00000003269	Cyth2	1762.28	0.092115	0.137389	0.670467	0.50256	0.999943
ENSMUSG00000003271	Sult2b1	129.673	0.0736895	0.267837	0.275128	0.783218	0.999943
ENSMUSG00000003273	Car11	1131.87	0.00884714	0.190259	0.0465005	0.962911	0.999943
ENSMUSG00000003279	Dlgap1	5403.59	-0.281467	0.143758	-1.95792	0.050239	0.999943
ENSMUSG00000003282	Plag1	14.0222	-0.246343	0.673459	-0.365787	0.714524	0.999943
ENSMUSG00000003283	Hck	68.4192	0.172217	0.310637	0.554399	0.579306	0.999943
ENSMUSG00000003299	Mrpl4	722.522	-0.0880223	0.153635	-0.572931	0.566692	0.999943
ENSMUSG00000003308	Keap1	1684.1	-0.00618696	0.194172	-0.0318633	0.974581	0.999943
ENSMUSG00000003309	Ap1m2	26.6466	0.564809	0.640915	0.881254	0.37818	0.999943
ENSMUSG00000003316	Glg1	6454.76	-0.0858661	0.124295	-0.690824	0.489676	0.999943
ENSMUSG00000003341	Atp8b3	4.48362	0.223981	0.998233	0.224377	0.822464	0.999943
ENSMUSG00000003344	Btbd2	2571.29	0.0670745	0.0834419	0.803847	0.421485	0.999943
ENSMUSG00000003345	Csnk1g2	2417.55	-0.0673286	0.114361	-0.588738	0.556037	0.999943
ENSMUSG00000003346	Abhd17a	3242.89	0.0771834	0.145582	0.530172	0.595993	0.999943
ENSMUSG00000003348	Mob3a	1054.93	0.148887	0.167237	0.89028	0.373316	0.999943
ENSMUSG00000003352	Cacnb3	3537.75	0.163285	0.11277	1.44794	0.147634	0.999943
ENSMUSG00000003354	Ccdc65	233.048	-0.273389	0.16392	-1.66782	0.0953524	0.999943
ENSMUSG00000003355	Fkbp11	32.7548	-0.0800302	0.42468	-0.188448	0.850525	0.999943
ENSMUSG00000003360	Ddx23	1497.76	0.182622	0.218828	0.834549	0.403972	0.999943
ENSMUSG00000003363	Pld3	7514.96	0.0536584	0.0963971	0.55664	0.577774	0.999943
ENSMUSG00000003378	Grik5	5569.5	0.0722855	0.100159	0.721706	0.470475	0.999943
ENSMUSG00000003380	Rabac1	2696.17	0.176272	0.180375	0.977254	0.328444	0.999943
ENSMUSG00000003382	Etv3	396.88	-0.0105048	0.13509	-0.0777612	0.938018	0.999943
ENSMUSG00000003402	Prkcsh	2218.18	0.0988797	0.120022	0.823843	0.410029	0.999943
ENSMUSG00000003410	Elavl3	12391.5	0.0655784	0.0820741	0.799015	0.424282	0.999943
ENSMUSG00000003411	Rab3b	2592.34	-0.0149052	0.105796	-0.140885	0.88796	0.999943
ENSMUSG00000003418	St8sia6	35.0559	-0.375552	0.526284	-0.713591	0.47548	0.999943
ENSMUSG00000003420	Fcgrt	133.556	1.10789	0.500399	2.21401	0.026828	0.999943
ENSMUSG00000003421	Nosip	964.056	-0.135985	0.156066	-0.871328	0.383575	0.999943
ENSMUSG00000003423	Pih1d1	872.529	-0.0413493	0.161334	-0.256295	0.797723	0.999943
ENSMUSG00000003429	Rps11	3008.8	0.236663	0.0991463	2.38701	0.0169859	0.994562
ENSMUSG00000003435	Supt5	3485.39	0.133028	0.145638	0.913417	0.361023	0.999943
ENSMUSG00000003436	Dll3	56.3207	0.645042	0.32413	1.99007	0.0465831	0.999943
ENSMUSG00000003437	Paf1	1085.11	-0.179772	0.158621	-1.13335	0.257068	0.999943
ENSMUSG00000003438	Timm50	832.755	0.0149784	0.140662	0.106485	0.915197	0.999943
ENSMUSG00000003444	Med29	373.281	0.00799598	0.177478	0.0450534	0.964065	0.999943
ENSMUSG00000003452	Bicd1	1326.87	-0.344816	0.230043	-1.49892	0.133895	0.999943
ENSMUSG00000003458	Ncstn	2051.56	-0.0146441	0.096381	-0.15194	0.879234	0.999943
ENSMUSG00000003464	Pex19	2883.32	0.013938	0.0938354	0.148537	0.881919	0.999943
ENSMUSG00000003469	Phyhip	3543.18	-0.0452952	0.0905364	-0.500298	0.616865	0.999943
ENSMUSG00000003476	Crhr2	81.5447	-0.220379	0.260405	-0.846293	0.39739	0.999943
ENSMUSG00000003484	Cyp4f18	0.605878	0.130753	3.05209	0.0428405	0.965829	NA
ENSMUSG00000003500	Impdh1	3145.23	0.0290769	0.0986712	0.294685	0.768235	0.999943
ENSMUSG00000003518	Dusp3	1945.5	-0.257484	0.127885	-2.01341	0.0440719	0.999943
ENSMUSG00000003526	Prodh	138.682	-0.0665509	0.295674	-0.225082	0.821915	0.999943
ENSMUSG00000003527	Ess2	645.808	0.0461908	0.129963	0.355415	0.722279	0.999943
ENSMUSG00000003528	Slc25a1	4084.6	0.0835296	0.104021	0.803004	0.421972	0.999943
ENSMUSG00000003531	Dgcr6	1302.67	0.089625	0.140736	0.636833	0.524234	0.999943
ENSMUSG00000003534	Ddr1	1794.45	0.100007	0.112581	0.888309	0.374375	0.999943
ENSMUSG00000003541	Ier3	89.704	0.27259	0.239963	1.13597	0.25597	0.999943
ENSMUSG00000003545	Fosb	150.824	-0.0746806	0.30669	-0.243505	0.807614	0.999943
ENSMUSG00000003546	Klc4	389.615	0.198427	0.132119	1.50188	0.133129	0.999943
ENSMUSG00000003549	Ercc1	274.218	0.0207353	0.166159	0.124792	0.900688	0.999943
ENSMUSG00000003555	Cyp17a1	0.51306	1.14886	3.14278	0.365556	0.714697	NA
ENSMUSG00000003559	As3mt	8.55834	-0.460601	0.782932	-0.588303	0.556329	0.999943
ENSMUSG00000003573	Homer3	211.121	0.297514	0.231408	1.28567	0.198559	0.999943
ENSMUSG00000003575	Crtc1	3671.06	-0.0650737	0.170633	-0.381367	0.702931	0.999943
ENSMUSG00000003581	Rnf215	851.346	0.118899	0.13771	0.863405	0.387915	0.999943
ENSMUSG00000003585	Sec14l2	236.779	0.0428639	0.210129	0.203988	0.838363	0.999943
ENSMUSG00000003604	Aven	172.724	0.160037	0.195168	0.819995	0.412219	0.999943
ENSMUSG00000003617	Cp	38.3276	0.885001	0.678384	1.30457	0.192038	0.999943
ENSMUSG00000003623	Crot	1364.55	0.0711083	0.122404	0.58093	0.561288	0.999943
ENSMUSG00000003644	Rps6ka1	311.952	0.229321	0.276704	0.828757	0.407242	0.999943
ENSMUSG00000003657	Calb2	1358.13	0.132036	0.108774	1.21386	0.224803	0.999943
ENSMUSG00000003660	Snrnp200	4053.7	-0.011017	0.0944115	-0.116692	0.907104	0.999943
ENSMUSG00000003662	Ciao1	906.054	-0.0508183	0.1261	-0.403	0.686948	0.999943
ENSMUSG00000003665	Has1	3.5268	-0.22056	1.11863	-0.19717	0.843695	0.999943
ENSMUSG00000003680	Taf6l	359.578	0.366056	0.176927	2.06897	0.0385489	0.999943
ENSMUSG00000003721	Insig2	628.129	-0.436208	0.252461	-1.72782	0.0840204	0.999943
ENSMUSG00000003731	Kpna6	3383.97	-0.0232481	0.167673	-0.138652	0.889725	0.999943
ENSMUSG00000003746	Man1a	381.322	-0.252503	0.136506	-1.84976	0.064348	0.999943
ENSMUSG00000003752	Itpkc	261.129	-0.00530507	0.183266	-0.0289474	0.976907	0.999943
ENSMUSG00000003762	Coq8b	443.899	-0.241809	0.190421	-1.26987	0.204133	0.999943
ENSMUSG00000003778	Brd8	981.801	0.329326	0.104249	3.15904	0.00158292	0.323426
ENSMUSG00000003779	Kif20a	42.8295	0.054747	0.338019	0.161964	0.871334	0.999943
ENSMUSG00000003808	Farsa	1166.26	0.0676176	0.131285	0.515043	0.606523	0.999943
ENSMUSG00000003809	Gcdh	453.147	0.0484173	0.122919	0.393897	0.693657	0.999943
ENSMUSG00000003810	Mast2	3397.91	0.0206511	0.163904	0.125995	0.899736	0.999943
ENSMUSG00000003812	Dnase2a	159.168	-0.480724	0.366497	-1.31167	0.189631	0.999943
ENSMUSG00000003813	Rad23a	1048.33	0.0794698	0.164451	0.483242	0.628924	0.999943
ENSMUSG00000003814	Calr	7476.95	-0.0120831	0.0914495	-0.132128	0.894883	0.999943
ENSMUSG00000003824	Syce2	243.919	0.209277	0.198922	1.05206	0.292774	0.999943
ENSMUSG00000003847	Nfat5	811.234	0.0933505	0.698117	0.133718	0.893626	0.999943
ENSMUSG00000003848	Nob1	584.575	0.0430759	0.180876	0.238152	0.811763	0.999943
ENSMUSG00000003849	Nqo1	19.8508	0.373294	0.4968	0.751398	0.452413	0.999943
ENSMUSG00000003863	Ppfia3	4377.13	0.0904329	0.114074	0.792758	0.427919	0.999943
ENSMUSG00000003865	Gys1	1670.17	0.156896	0.144374	1.08673	0.277155	0.999943
ENSMUSG00000003868	Ruvbl2	1220.31	-0.340336	0.257154	-1.32347	0.185678	0.999943
ENSMUSG00000003872	Lin7b	955.755	-0.0193682	0.143323	-0.135137	0.892503	0.999943
ENSMUSG00000003873	Bax	1461.35	0.0588716	0.166802	0.352943	0.724131	0.999943
ENSMUSG00000003882	Il7r	1.29594	-1.27909	1.87276	-0.682998	0.494608	NA
ENSMUSG00000003923	Tfam	849.309	-0.0955448	0.137128	-0.696758	0.485954	0.999943
ENSMUSG00000003929	Zfp81	1006.8	0.000400963	0.159487	0.00251408	0.997994	0.999943
ENSMUSG00000003934	Efnb3	9352.2	0.120644	0.088262	1.36688	0.171662	0.999943
ENSMUSG00000003948	Mmd	3715.45	0.0475756	0.101712	0.46775	0.639964	0.999943
ENSMUSG00000003949	Hlf	387.377	0.369418	0.198531	1.86075	0.0627791	0.999943
ENSMUSG00000003955	Fam162a	997.069	0.116979	0.171614	0.68164	0.495467	0.999943
ENSMUSG00000003970	Rpl8	5667.89	0.0491872	0.11738	0.419041	0.675187	0.999943
ENSMUSG00000003974	Grm3	1245.65	-0.0190809	0.144865	-0.131715	0.89521	0.999943
ENSMUSG00000003992	Ssbp2	4161.33	0.0196151	0.104008	0.188593	0.850412	0.999943
ENSMUSG00000004018	Fancl	255.88	0.0930802	0.222634	0.418087	0.675884	0.999943
ENSMUSG00000004031	Brinp2	3389.54	0.00131901	0.0899879	0.0146576	0.988305	0.999943
ENSMUSG00000004032	Gstm5	1708.43	0.0153387	0.116182	0.132023	0.894966	0.999943
ENSMUSG00000004035	Gstm7	193.608	0.0921305	0.165881	0.555402	0.57862	0.999943
ENSMUSG00000004038	Gstm3	1.06998	2.45501	2.57666	0.952786	0.340698	NA
ENSMUSG00000004040	Stat3	1585.5	0.0174088	0.164107	0.106082	0.915517	0.999943
ENSMUSG00000004043	Stat5a	5.44116	-0.855031	1.15366	-0.741145	0.458605	0.999943
ENSMUSG00000004044	Cavin1	90.5884	-0.185101	0.302688	-0.611526	0.540851	0.999943
ENSMUSG00000004054	Map3k11	219.14	0.132463	0.174113	0.760789	0.446783	0.999943
ENSMUSG00000004056	Akt2	1729.52	-0.106033	0.107735	-0.984199	0.325017	0.999943
ENSMUSG00000004069	Dnaja3	1984.18	0.0601412	0.103283	0.582295	0.560368	0.999943
ENSMUSG00000004070	Hmox2	1227.94	0.0300092	0.131845	0.22761	0.819949	0.999943
ENSMUSG00000004071	Cdip1	3052.01	0.0599655	0.0885396	0.677274	0.498232	0.999943
ENSMUSG00000004085	Map3k20	300.127	-0.0115098	0.160556	-0.0716873	0.942851	0.999943
ENSMUSG00000004096	Cwc15	941.749	0.0252063	0.138782	0.181625	0.855877	0.999943
ENSMUSG00000004098	Col5a3	36.2345	0.316816	0.378935	0.836068	0.403117	0.999943
ENSMUSG00000004099	Dnmt1	2131.29	-0.0365165	0.134615	-0.271267	0.786186	0.999943
ENSMUSG00000004100	Ppan	380.048	0.0705198	0.18043	0.390843	0.695913	0.999943
ENSMUSG00000004105	Angptl2	71.4592	0.180371	0.3282	0.549576	0.58261	0.999943
ENSMUSG00000004110	Cacna1e	5929.28	-0.0323269	0.260782	-0.123961	0.901346	0.999943
ENSMUSG00000004113	Cacna1b	5645.86	-0.0480863	0.170488	-0.28205	0.777905	0.999943
ENSMUSG00000004127	Trmt10a	193.177	-0.185591	0.299483	-0.619704	0.535453	0.999943
ENSMUSG00000004151	Etv1	1279.32	0.161555	0.213944	0.755126	0.450173	0.999943
ENSMUSG00000004187	Kifc2	5611.58	0.0443199	0.112644	0.393453	0.693985	0.999943
ENSMUSG00000004207	Psap	34721.1	0.0906042	0.0980821	0.923759	0.355612	0.999943
ENSMUSG00000004221	Ikbkg	1176.15	-0.056785	0.166357	-0.341345	0.732844	0.999943
ENSMUSG00000004231	Pax2	5.94884	0.333866	0.848403	0.393523	0.693933	0.999943
ENSMUSG00000004233	Wars2	247.686	0.187698	0.315215	0.59546	0.551536	0.999943
ENSMUSG00000004263	Atn1	5495.79	-0.0139564	0.110973	-0.125765	0.899918	0.999943
ENSMUSG00000004264	Phb2	2210.94	0.0741144	0.114559	0.646957	0.51766	0.999943
ENSMUSG00000004266	Ptpn6	13.6433	3.09817	1.55109	1.99741	0.0457805	0.999943
ENSMUSG00000004267	Eno2	5436.43	-0.0866598	0.128554	-0.674113	0.500239	0.999943
ENSMUSG00000004268	Emg1	566.522	-0.122232	0.135938	-0.899176	0.368559	0.999943
ENSMUSG00000004270	Lpcat3	705.271	0.050156	0.163348	0.30705	0.758805	0.999943
ENSMUSG00000004285	Atp6v1f	1958.08	0.053885	0.120061	0.448815	0.653565	0.999943
ENSMUSG00000004317	Clcn5	906.858	-0.300056	0.211683	-1.41747	0.156345	0.999943
ENSMUSG00000004319	Clcn3	6383.23	-0.110381	0.134937	-0.818025	0.413343	0.999943
ENSMUSG00000004328	Hif3a	271.898	0.190726	0.197971	0.963404	0.335345	0.999943
ENSMUSG00000004341	Gpx6	0.817742	2.85506	2.75838	1.03505	0.300646	NA
ENSMUSG00000004347	Pde1c	82.8828	-0.147349	0.308915	-0.476988	0.633371	0.999943
ENSMUSG00000004356	Utp20	538.751	-0.285565	0.166716	-1.71288	0.0867341	0.999943
ENSMUSG00000004360	9330159F19Rik	2099.68	0.0154795	0.160959	0.0961707	0.923385	0.999943
ENSMUSG00000004364	Cul3	3371.13	-0.103727	0.0904955	-1.14621	0.251708	0.999943
ENSMUSG00000004366	Sst	1927.75	-0.0670474	0.106982	-0.626718	0.530844	0.999943
ENSMUSG00000004371	Il11	10.8369	0.266923	0.676741	0.394424	0.693268	0.999943
ENSMUSG00000004383	Large1	5606.22	-0.0543856	0.0991571	-0.548479	0.583363	0.999943
ENSMUSG00000004393	Ddx56	916.352	0.147971	0.102392	1.44515	0.148416	0.999943
ENSMUSG00000004394	Tmed4	1180.75	0.0356815	0.128792	0.277048	0.781743	0.999943
ENSMUSG00000004415	Col26a1	1154.03	-0.214589	0.171514	-1.25114	0.210882	0.999943
ENSMUSG00000004446	Bid	653.12	-0.081093	0.158637	-0.511187	0.60922	0.999943
ENSMUSG00000004451	Ralb	1018.15	-0.0822486	0.107261	-0.766812	0.443193	0.999943
ENSMUSG00000004455	Ppp1cc	1871.12	-0.131362	0.128287	-1.02397	0.30585	0.999943
ENSMUSG00000004460	Dnajb11	1348.05	0.0970832	0.107902	0.899731	0.368263	0.999943
ENSMUSG00000004462	Tbccd1	310.687	0.626343	0.278832	2.24631	0.0246842	0.999943
ENSMUSG00000004473	Clec11a	57.432	-0.171653	0.284644	-0.603045	0.546479	0.999943
ENSMUSG00000004500	Zfp324	475.809	0.102595	0.27319	0.375544	0.707256	0.999943
ENSMUSG00000004508	Gab2	1531.8	0.0416208	0.133434	0.311921	0.755101	0.999943
ENSMUSG00000004530	Coro1c	3581.1	-0.178736	0.126208	-1.41621	0.156715	0.999943
ENSMUSG00000004535	Tax1bp1	3576.67	-0.0360698	0.0998022	-0.361413	0.717791	0.999943
ENSMUSG00000004558	Ndrg2	8166.8	0.0894308	0.0955452	0.936005	0.349271	0.999943
ENSMUSG00000004561	Mettl17	408.898	0.243252	0.231487	1.05082	0.293339	0.999943
ENSMUSG00000004562	Arhgef40	483.922	0.320968	0.229306	1.39974	0.161591	0.999943
ENSMUSG00000004565	Pnpla6	1532.51	0.081639	0.142108	0.574487	0.565638	0.999943
ENSMUSG00000004567	Mcoln1	1486.84	-0.376796	0.109556	-3.43929	0.000583234	0.213825
ENSMUSG00000004568	Arhgef18	1151.16	-0.172435	0.100794	-1.71076	0.0871246	0.999943
ENSMUSG00000004591	Pkn2	529.979	0.0118351	0.169991	0.0696218	0.944495	0.999943
ENSMUSG00000004609	Cd33	1.2157	-2.4617	2.09676	-1.17405	0.240374	NA
ENSMUSG00000004610	Etfb	620.185	0.182207	0.136109	1.33868	0.180676	0.999943
ENSMUSG00000004626	Stxbp2	598.515	-0.337955	0.191014	-1.76927	0.0768488	0.999943
ENSMUSG00000004630	Pcp2	1.30405	1.67942	2.04196	0.822455	0.410818	NA
ENSMUSG00000004631	Sgce	444.192	0.205617	0.168077	1.22335	0.221198	0.999943
ENSMUSG00000004633	Chn2	1075.79	-0.163111	0.13359	-1.22099	0.22209	0.999943
ENSMUSG00000004637	Wwox	354.634	0.193566	0.168091	1.15155	0.249505	0.999943
ENSMUSG00000004642	Slbp	1001.46	0.142947	0.10778	1.32628	0.184747	0.999943
ENSMUSG00000004651	Tyr	3.9094	-0.665941	1.21031	-0.550223	0.582167	0.999943
ENSMUSG00000004654	Ghrhr	0.77845	-2.96949	2.62383	-1.13174	0.257745	NA
ENSMUSG00000004655	Aqp1	6.826	0.031636	0.798547	0.039617	0.968399	0.999943
ENSMUSG00000004661	Arid3b	63.0162	0.186169	0.430215	0.432734	0.665208	0.999943
ENSMUSG00000004665	Cnn2	41.4898	-0.402569	0.406723	-0.989788	0.322278	0.999943
ENSMUSG00000004667	Polr2e	1088.29	0.115075	0.166742	0.690137	0.490108	0.999943
ENSMUSG00000004668	Abca13	9.70725	-0.807158	0.670993	-1.20293	0.229003	0.999943
ENSMUSG00000004677	Myo9b	763.692	-0.272263	0.18504	-1.47138	0.14119	0.999943
ENSMUSG00000004698	Hdac9	3280.53	-0.117161	0.147629	-0.793613	0.427421	0.999943
ENSMUSG00000004730	Adgre1	6.96403	-0.222549	0.797179	-0.279171	0.780113	0.999943
ENSMUSG00000004748	Mtfp1	534.647	0.0759977	0.154492	0.49192	0.622776	0.999943
ENSMUSG00000004768	Rab23	1072.31	-0.0539465	0.148526	-0.363213	0.716446	0.999943
ENSMUSG00000004771	Rab11a	5079.79	-0.069288	0.116783	-0.593307	0.552976	0.999943
ENSMUSG00000004788	Eif2b2	674.146	-0.0353271	0.205799	-0.171659	0.863706	0.999943
ENSMUSG00000004789	Dlst	3768.15	0.0794388	0.0817956	0.971187	0.331455	0.999943
ENSMUSG00000004791	Pgf	44.1213	-0.114423	0.350983	-0.326006	0.74442	0.999943
ENSMUSG00000004798	Ulk2	5574.39	-0.121825	0.113723	-1.07124	0.284062	0.999943
ENSMUSG00000004814	Ccl24	1.73798	0.76978	1.61425	0.476865	0.633459	NA
ENSMUSG00000004815	Dgkq	755.873	-0.251265	0.168487	-1.4913	0.135883	0.999943
ENSMUSG00000004837	Grap	2.26682	1.00127	1.49084	0.671617	0.501827	NA
ENSMUSG00000004842	Pou1f1	0.806481	0.925757	2.38689	0.387851	0.698127	NA
ENSMUSG00000004843	Chmp2b	2372.66	0.0520051	0.0875909	0.593727	0.552695	0.999943
ENSMUSG00000004846	Plod3	753.841	0.0329443	0.15143	0.217555	0.827776	0.999943
ENSMUSG00000004849	Ap1s1	3249.96	0.0661739	0.136408	0.485118	0.627593	0.999943
ENSMUSG00000004864	Mapk13	7.15688	0.731797	0.853002	0.857907	0.390944	0.999943
ENSMUSG00000004865	Srpk1	1732.02	-0.0882431	0.138777	-0.635863	0.524866	0.999943
ENSMUSG00000004880	Lbr	369.8	-0.55661	0.362524	-1.53538	0.124692	0.999943
ENSMUSG00000004885	Crabp2	1.34478	-1.68079	2.34425	-0.716983	0.473385	NA
ENSMUSG00000004891	Nes	564.557	0.516042	0.149912	3.4423	0.00057679	0.213825
ENSMUSG00000004892	Bcan	4501.66	0.055886	0.126543	0.441637	0.658752	0.999943
ENSMUSG00000004894	Hapln2	11.0394	-0.316543	0.740352	-0.427558	0.668973	0.999943
ENSMUSG00000004895	Prcc	1213.66	0.123093	0.120174	1.0243	0.305695	0.999943
ENSMUSG00000004896	Rrnad1	253.293	0.154567	0.23469	0.658599	0.510153	0.999943
ENSMUSG00000004897	Hdgf	3249.01	0.138357	0.162227	0.85286	0.393737	0.999943
ENSMUSG00000004902	Slc25a18	203.319	-0.0632044	0.216901	-0.291397	0.770748	0.999943
ENSMUSG00000004929	Thop1	1679.21	0.0947641	0.114538	0.827363	0.408032	0.999943
ENSMUSG00000004931	Apba3	433.152	0.0121504	0.195316	0.062209	0.950396	0.999943
ENSMUSG00000004933	Matk	1998.1	-0.0621174	0.112997	-0.549726	0.582507	0.999943
ENSMUSG00000004934	Pias4	546.923	0.246053	0.226778	1.085	0.277923	0.999943
ENSMUSG00000004936	Map2k1	5132.53	-0.0500129	0.0984195	-0.508161	0.611341	0.999943
ENSMUSG00000004937	Sgta	3942.92	0.0371123	0.099083	0.374557	0.70799	0.999943
ENSMUSG00000004939	Nmrk2	2.26302	0.593304	1.54752	0.38339	0.701431	NA
ENSMUSG00000004945	Tmem242	905.495	0.0905588	0.149726	0.604831	0.545292	0.999943
ENSMUSG00000004947	Dtx2	250.288	0.155725	0.218771	0.711817	0.476578	0.999943
ENSMUSG00000004948	Zp3	0.836037	-0.67858	2.38175	-0.284909	0.775714	NA
ENSMUSG00000004951	Hspb1	1.29651	0.783452	2.0404	0.38397	0.701001	NA
ENSMUSG00000004952	Rasa4	108.391	0.177406	0.285898	0.62052	0.534916	0.999943
ENSMUSG00000004961	Syt5	5125.02	0.0837919	0.0909723	0.921071	0.357013	0.999943
ENSMUSG00000004980	Hnrnpa2b1	8695.58	0.0192132	0.106096	0.181093	0.856295	0.999943
ENSMUSG00000004994	Ccdc130	292.772	-0.22233	0.153591	-1.44755	0.147743	0.999943
ENSMUSG00000004996	Mri1	164.287	-0.226566	0.217854	-1.03999	0.298344	0.999943
ENSMUSG00000005034	Prkacb	13252.7	-0.089629	0.153594	-0.583544	0.559527	0.999943
ENSMUSG00000005043	Sgsh	354.123	0.0360578	0.348978	0.103324	0.917706	0.999943
ENSMUSG00000005045	Chd5	7652.25	0.0359061	0.146383	0.245288	0.806233	0.999943
ENSMUSG00000005054	Cstb	362.656	0.0175299	0.196048	0.0894163	0.928751	0.999943
ENSMUSG00000005057	Sh2b2	427.629	-0.0434887	0.223064	-0.19496	0.845424	0.999943
ENSMUSG00000005069	Pex5	2686.62	-0.0690493	0.093476	-0.738685	0.460099	0.999943
ENSMUSG00000005078	Jkamp	1395.9	-0.12885	0.120843	-1.06626	0.286307	0.999943
ENSMUSG00000005087	Cd44	528.461	0.15416	0.15591	0.988774	0.322774	0.999943
ENSMUSG00000005089	Slc1a2	23514.6	-0.354863	0.259975	-1.36499	0.172257	0.999943
ENSMUSG00000005102	Eif2ak4	584.903	-0.120533	0.186373	-0.646732	0.517805	0.999943
ENSMUSG00000005103	Wdr1	6468.8	-0.104541	0.1291	-0.809764	0.418076	0.999943
ENSMUSG00000005107	Slc2a9	16.2497	-0.266074	0.753686	-0.35303	0.724066	0.999943
ENSMUSG00000005124	Ccn4	18.5509	0.25428	0.524291	0.484997	0.627678	0.999943
ENSMUSG00000005125	Ndrg1	4377.6	-0.0859288	0.0996054	-0.862692	0.388307	0.999943
ENSMUSG00000005131	4930550C14Rik	8.00472	0.346013	0.777888	0.44481	0.656457	0.999943
ENSMUSG00000005142	Man2b1	801.026	0.0126121	0.124407	0.101378	0.91925	0.999943
ENSMUSG00000005148	Klf5	418.76	0.0378481	0.131219	0.288434	0.773014	0.999943
ENSMUSG00000005150	Wdr83	358.786	0.109952	0.200927	0.547225	0.584224	0.999943
ENSMUSG00000005161	Prdx2	7356.5	0.00970252	0.115549	0.0839687	0.933081	0.999943
ENSMUSG00000005198	Polr2a	2404.47	-0.024103	0.152935	-0.157602	0.87477	0.999943
ENSMUSG00000005204	Senp3	1717.29	0.212307	0.124088	1.71095	0.087091	0.999943
ENSMUSG00000005220	Corin	1.82636	0.358416	1.45991	0.245506	0.806065	NA
ENSMUSG00000005225	Plekha8	409.613	-0.0058582	0.128373	-0.0456343	0.963602	0.999943
ENSMUSG00000005233	Spc25	89.4244	-0.303626	0.310889	-0.976639	0.328748	0.999943
ENSMUSG00000005237	Dnah2	92.5676	-0.584741	0.327221	-1.78699	0.0739386	0.999943
ENSMUSG00000005251	Ripk4	16.8612	-0.315486	0.551439	-0.572114	0.567245	0.999943
ENSMUSG00000005262	Ufd1	1706.79	0.283509	0.225333	1.25818	0.208328	0.999943
ENSMUSG00000005267	Zfp287	383.919	-0.136354	0.135991	-1.00267	0.31602	0.999943
ENSMUSG00000005268	Prlr	30.2493	-0.23647	0.422871	-0.5592	0.576025	0.999943
ENSMUSG00000005299	Letm1	2107.94	0.0759597	0.0951757	0.7981	0.424813	0.999943
ENSMUSG00000005312	Ubqln1	5356.82	0.0579007	0.118295	0.489461	0.624515	0.999943
ENSMUSG00000005320	Fgfr4	0.944459	-0.776231	2.59089	-0.299601	0.764482	NA
ENSMUSG00000005338	Cadm3	23356.6	0.0333259	0.113004	0.294908	0.768064	0.999943
ENSMUSG00000005354	Txn2	2039.89	0.144415	0.212212	0.680523	0.496173	0.999943
ENSMUSG00000005357	Slc1a6	487.787	-0.09878	0.135339	-0.729872	0.465468	0.999943
ENSMUSG00000005360	Slc1a3	17032.8	0.0188207	0.122152	0.154076	0.87755	0.999943
ENSMUSG00000005362	Crbn	1123.77	-0.162483	0.135212	-1.20169	0.229482	0.999943
ENSMUSG00000005364	Il5ra	1.93813	0.606578	1.64176	0.369469	0.711778	NA
ENSMUSG00000005370	Msh6	647.328	-0.000380648	0.128727	-0.00295702	0.997641	0.999943
ENSMUSG00000005371	Fbxo11	3047.67	-0.124163	0.103152	-1.20369	0.22871	0.999943
ENSMUSG00000005373	Mlxipl	9.51062	-0.228945	0.657105	-0.348414	0.72753	0.999943
ENSMUSG00000005374	Tbl2	1166.6	0.267918	0.183462	1.46035	0.144194	0.999943
ENSMUSG00000005378	Bud23	421.05	0.0874114	0.177852	0.491485	0.623084	0.999943
ENSMUSG00000005397	Nid1	25.6342	-0.0798222	0.446496	-0.178775	0.858115	0.999943
ENSMUSG00000005410	Mcm5	92.1692	-0.0448142	0.288377	-0.155402	0.876505	0.999943
ENSMUSG00000005413	Hmox1	995.221	0.331292	0.14562	2.27505	0.022903	0.999943
ENSMUSG00000005417	Mprip	6680.7	0.121053	0.126028	0.960526	0.336791	0.999943
ENSMUSG00000005442	Cic	7431.59	0.290827	0.178086	1.63307	0.102453	0.999943
ENSMUSG00000005447	Pafah1b3	1199.08	0.105615	0.128564	0.821499	0.411362	0.999943
ENSMUSG00000005465	Il27ra	11.995	0.00651463	0.699937	0.00930745	0.992574	0.999943
ENSMUSG00000005469	Prkaca	4785.9	-0.0309456	0.0790865	-0.391287	0.695585	0.999943
ENSMUSG00000005470	Asf1b	18.4108	0.298639	0.776774	0.384461	0.700637	0.999943
ENSMUSG00000005481	Ddx39a	420.232	-0.230147	0.194559	-1.18292	0.236842	0.999943
ENSMUSG00000005483	Dnajb1	1042.7	0.102352	0.107579	0.95141	0.341397	0.999943
ENSMUSG00000005493	Msh4	6.69955	-0.168513	0.807861	-0.208592	0.834767	0.999943
ENSMUSG00000005501	Usp40	291.926	-0.184197	0.156332	-1.17824	0.2387	0.999943
ENSMUSG00000005505	Kbtbd4	653.513	-0.210723	0.137221	-1.53565	0.124624	0.999943
ENSMUSG00000005506	Celf1	4480.57	-0.220843	0.210545	-1.04891	0.294219	0.999943
ENSMUSG00000005510	Ndufs3	1530.66	0.180536	0.141904	1.27224	0.203289	0.999943
ENSMUSG00000005514	Por	2642.74	0.0808356	0.091911	0.879498	0.379131	0.999943
ENSMUSG00000005533	Igf1r	1638.25	-0.00398054	0.213006	-0.0186875	0.98509	0.999943
ENSMUSG00000005534	Insr	1639.49	-0.212401	0.300587	-0.70662	0.479802	0.999943
ENSMUSG00000005540	Fcer2a	19.3886	-0.0259855	0.490057	-0.0530254	0.957712	0.999943
ENSMUSG00000005547	Cyp2a5	0.794848	0.329862	2.48176	0.132914	0.894261	NA
ENSMUSG00000005553	Atp4a	61.724	-0.465407	0.295387	-1.57558	0.115122	0.999943
ENSMUSG00000005566	Trim28	4721.16	0.156531	0.0813698	1.9237	0.0543919	0.999943
ENSMUSG00000005575	Ube2m	2602.04	0.0564299	0.11533	0.489291	0.624636	0.999943
ENSMUSG00000005580	Adcy9	587.005	-0.0733992	0.150119	-0.48894	0.624884	0.999943
ENSMUSG00000005583	Mef2c	20651.7	-0.245378	0.196268	-1.25022	0.211219	0.999943
ENSMUSG00000005609	Ctr9	1942.51	-0.097548	0.209985	-0.464548	0.642255	0.999943
ENSMUSG00000005610	Eif4g2	34439.2	-0.0906424	0.113385	-0.799422	0.424046	0.999943
ENSMUSG00000005615	Pcyt1a	1483.96	-0.139675	0.137198	-1.01805	0.308654	0.999943
ENSMUSG00000005621	Zfp592	881.591	0.576246	0.327196	1.76116	0.0782106	0.999943
ENSMUSG00000005625	Psmd4	2263.35	0.0187007	0.150401	0.124339	0.901047	0.999943
ENSMUSG00000005628	Tmod4	1.1939	1.32879	1.96907	0.674831	0.499783	NA
ENSMUSG00000005640	Insrr	2.65475	-0.144893	1.27156	-0.113949	0.909278	NA
ENSMUSG00000005649	Cabp5	1.29589	-0.884235	2.13088	-0.414962	0.67817	NA
ENSMUSG00000005656	Snx6	1536.22	0.155985	0.113495	1.37437	0.169326	0.999943
ENSMUSG00000005667	Mthfd2	2288.94	-0.0548268	0.120649	-0.454431	0.649519	0.999943
ENSMUSG00000005672	Kit	1164.04	-0.0939989	0.174237	-0.539489	0.58955	0.999943
ENSMUSG00000005674	Tomm40l	1246.61	-0.0339818	0.164721	-0.206299	0.836557	0.999943
ENSMUSG00000005677	Nr1i3	4.11476	-0.495886	1.25551	-0.394968	0.692866	0.999943
ENSMUSG00000005681	Apoa2	13.0314	-0.303995	0.638281	-0.476271	0.633881	0.999943
ENSMUSG00000005682	Pan2	432.254	-0.107605	0.159671	-0.67392	0.500362	0.999943
ENSMUSG00000005683	Cs	9996.04	0.0270085	0.08634	0.312815	0.754421	0.999943
ENSMUSG00000005686	Ampd3	143.285	-0.344822	0.400181	-0.861665	0.388872	0.999943
ENSMUSG00000005687	Bcas2	1617.09	0.0267342	0.149752	0.178523	0.858312	0.999943
ENSMUSG00000005696	Sh2d1a	34.3025	2.34565	1.8553	1.2643	0.206123	0.999943
ENSMUSG00000005698	Ctcf	1437.94	-0.0173828	0.146487	-0.118665	0.905541	0.999943
ENSMUSG00000005699	Pard6a	553.03	0.0953834	0.124827	0.764125	0.444793	0.999943
ENSMUSG00000005705	Agrp	5.37982	-0.536209	0.938264	-0.57149	0.567667	0.999943
ENSMUSG00000005716	Pvalb	5.53313	1.34253	0.943876	1.42235	0.154923	0.999943
ENSMUSG00000005718	Tfap4	96.3399	0.0591801	0.263281	0.224779	0.822151	0.999943
ENSMUSG00000005732	Ranbp1	1347.29	0.0929218	0.109003	0.85247	0.393953	0.999943
ENSMUSG00000005763	Cd247	5.26015	1.90639	1.71354	1.11255	0.265904	0.999943
ENSMUSG00000005774	Rfx5	413.846	-0.199088	0.218	-0.913248	0.361112	0.999943
ENSMUSG00000005779	Psmb4	2932.71	0.174437	0.110201	1.5829	0.113445	0.999943
ENSMUSG00000005802	Slc30a4	2014.86	-0.0237651	0.126998	-0.187129	0.85156	0.999943
ENSMUSG00000005803	Sqor	19.01	0.787242	0.538131	1.46292	0.143489	0.999943
ENSMUSG00000005804	Bloc1s6	1554.69	-0.0215163	0.113096	-0.190248	0.849115	0.999943
ENSMUSG00000005813	Metap1	1455.54	0.0217808	0.112349	0.193868	0.846279	0.999943
ENSMUSG00000005823	Gpr108	238.072	0.105056	0.167503	0.627185	0.530538	0.999943
ENSMUSG00000005846	Rsl1d1	1597.5	0.0186894	0.193601	0.0965356	0.923095	0.999943
ENSMUSG00000005864	Cnga2	10.247	2.82291	1.16771	2.41747	0.0156288	0.976305
ENSMUSG00000005871	Apc	23586.7	-0.235113	0.426904	-0.550739	0.581813	0.999943
ENSMUSG00000005873	Reep5	15029.1	0.0494574	0.0867067	0.570398	0.568408	0.999943
ENSMUSG00000005881	Ergic3	2987.44	0.0762524	0.125487	0.607651	0.543419	0.999943
ENSMUSG00000005882	Uqcc1	1001.77	-0.133334	0.228565	-0.583355	0.559655	0.999943
ENSMUSG00000005886	Ncoa2	2633.58	-0.13317	0.150235	-0.886412	0.375395	0.999943
ENSMUSG00000005892	Trh	9.69935	0.171059	0.778466	0.219739	0.826075	0.999943
ENSMUSG00000005893	Nr2c2	3047.45	-0.226372	0.171294	-1.32154	0.18632	0.999943
ENSMUSG00000005897	Nr2c1	159.715	-0.0365729	0.21105	-0.17329	0.862423	0.999943
ENSMUSG00000005899	Smpd4	968.492	-0.0168616	0.292983	-0.0575516	0.954106	0.999943
ENSMUSG00000005907	Pex1	462.011	-0.0599801	0.18563	-0.323117	0.746606	0.999943
ENSMUSG00000005917	Otx1	100.359	0.359944	0.28829	1.24855	0.21183	0.999943
ENSMUSG00000005936	Kctd20	2697.5	0.0139062	0.0987555	0.140815	0.888016	0.999943
ENSMUSG00000005947	Itgae	1.99137	1.11571	1.60336	0.69586	0.486517	NA
ENSMUSG00000005949	Ctns	284.934	-0.055909	0.204351	-0.273593	0.784397	0.999943
ENSMUSG00000005950	P2rx5	12.7196	-0.310697	0.676831	-0.459047	0.646201	0.999943
ENSMUSG00000005951	Shpk	76.0099	0.146153	0.281738	0.518755	0.603931	0.999943
ENSMUSG00000005952	Trpv1	31.5741	0.353593	0.401925	0.879749	0.378995	0.999943
ENSMUSG00000005958	Ephb3	523.225	0.303367	0.194621	1.55876	0.119054	0.999943
ENSMUSG00000005968	Tuft1	88.321	0.509625	0.392936	1.29697	0.194643	0.999943
ENSMUSG00000005973	Rcn1	3354.44	0.0224954	0.109897	0.204695	0.837811	0.999943
ENSMUSG00000005980	Dnase1	84.5563	0.418409	0.324225	1.29049	0.196882	0.999943
ENSMUSG00000005981	Trap1	1864.8	0.0721112	0.137667	0.523811	0.60041	0.999943
ENSMUSG00000005982	Naa60	3202.46	-0.00694775	0.110861	-0.0626709	0.950029	0.999943
ENSMUSG00000005983	1700037C18Rik	91.7707	-0.0738578	0.250612	-0.294709	0.768216	0.999943
ENSMUSG00000005986	Ankrd13d	1568.67	0.0395727	0.180127	0.219693	0.82611	0.999943
ENSMUSG00000005994	Tyrp1	1.5178	1.43882	1.74055	0.826649	0.408436	NA
ENSMUSG00000006005	Tpr	3752.6	-0.000532021	0.164151	-0.00324105	0.997414	0.999943
ENSMUSG00000006010	Odr4	1238.19	-0.0676211	0.145341	-0.465257	0.641747	0.999943
ENSMUSG00000006014	Prg4	10.1151	-0.925327	0.695564	-1.33033	0.183411	0.999943
ENSMUSG00000006019	Dhx34	366.106	-0.145888	0.158487	-0.920508	0.357307	0.999943
ENSMUSG00000006021	Kptn	362.519	-0.147191	0.148127	-0.993683	0.320377	0.999943
ENSMUSG00000006024	Napa	3030.54	-0.00102774	0.0926514	-0.0110925	0.99115	0.999943
ENSMUSG00000006050	Sra1	1252.14	0.0654979	0.127566	0.513445	0.60764	0.999943
ENSMUSG00000006057	Atp5g1	2120.57	0.0839793	0.109479	0.767081	0.443033	0.999943
ENSMUSG00000006058	Snf8	1012.43	-0.00744802	0.131682	-0.0565606	0.954895	0.999943
ENSMUSG00000006095	Tbcb	2224.93	0.174491	0.111063	1.5711	0.11616	0.999943
ENSMUSG00000006127	Inpp5k	716.059	0.185695	0.124639	1.48987	0.136258	0.999943
ENSMUSG00000006134	Crkl	1024.86	-0.145237	0.176358	-0.823536	0.410203	0.999943
ENSMUSG00000006154	Eps8l1	91.045	0.174992	0.321864	0.543684	0.586659	0.999943
ENSMUSG00000006169	Clint1	1267.84	-0.0094644	0.113456	-0.0834193	0.933518	0.999943
ENSMUSG00000006179	Prss16	4.8939	0.383814	0.931253	0.412147	0.680231	0.999943
ENSMUSG00000006191	Cdkal1	196.269	0.038062	0.226413	0.168108	0.866498	0.999943
ENSMUSG00000006204	Cdcp3	1.28271	-1.40575	2.06671	-0.680186	0.496387	NA
ENSMUSG00000006205	Htra1	1206.42	0.144469	0.174684	0.827031	0.408219	0.999943
ENSMUSG00000006215	Zbtb17	526.855	-0.169596	0.149218	-1.13657	0.255719	0.999943
ENSMUSG00000006218	Fam131c	434.838	0.203789	0.130451	1.56219	0.118243	0.999943
ENSMUSG00000006219	Fblim1	193.094	-0.432003	0.229411	-1.8831	0.0596871	0.999943
ENSMUSG00000006221	Hspb7	0.658289	-1.19906	2.89064	-0.414807	0.678283	NA
ENSMUSG00000006235	Epor	4.70671	0.0944897	0.974947	0.0969178	0.922792	0.999943
ENSMUSG00000006241	Ccdc159	146.944	-0.250244	0.202237	-1.23738	0.215945	0.999943
ENSMUSG00000006262	Mob1b	948.745	-0.04889	0.202023	-0.242002	0.808778	0.999943
ENSMUSG00000006269	Atp6v1b1	2.26775	0.356598	1.54646	0.230589	0.817634	NA
ENSMUSG00000006270	Vax1	21.4591	-2.11052	0.966324	-2.18407	0.0289572	0.999943
ENSMUSG00000006273	Atp6v1b2	11820.4	-0.129303	0.0863925	-1.49669	0.134473	0.999943
ENSMUSG00000006276	Eps15l1	1029.94	-0.0122962	0.0997856	-0.123226	0.901928	0.999943
ENSMUSG00000006281	Tep1	20.7652	0.996453	0.757457	1.31552	0.188334	0.999943
ENSMUSG00000006288	Ttc5	1029.27	-0.0404156	0.137405	-0.294136	0.768654	0.999943
ENSMUSG00000006289	Osgep	582.553	-0.0229618	0.14364	-0.159856	0.872995	0.999943
ENSMUSG00000006299	Aamp	3184.74	0.0287622	0.127063	0.226362	0.82092	0.999943
ENSMUSG00000006301	Tmbim1	159.468	0.802414	0.239934	3.34431	0.000824861	0.228268
ENSMUSG00000006304	Arpc2	6104.91	0.034343	0.0996393	0.344673	0.73034	0.999943
ENSMUSG00000006307	Kmt2b	1607.64	0.20814	0.155066	1.34227	0.179509	0.999943
ENSMUSG00000006310	Zbtb32	12.3465	-0.719171	0.603681	-1.19131	0.233532	0.999943
ENSMUSG00000006313	Upk1a	6.00666	-1.50124	0.907931	-1.65348	0.0982336	0.999943
ENSMUSG00000006315	Tmem147	1498.16	0.0401334	0.137225	0.292465	0.769931	0.999943
ENSMUSG00000006333	Rps9	3591.34	0.066527	0.119532	0.556562	0.577827	0.999943
ENSMUSG00000006335	Tfpt	289.609	0.0312717	0.188919	0.16553	0.868527	0.999943
ENSMUSG00000006342	Susd2	21.1148	0.404931	0.47146	0.858886	0.390404	0.999943
ENSMUSG00000006344	Ggt5	2.83824	-1.22909	1.36094	-0.903118	0.366463	NA
ENSMUSG00000006345	Ggt1	16.2811	0.336679	0.599633	0.561474	0.574474	0.999943
ENSMUSG00000006356	Crip2	3672.13	0.0405727	0.0979735	0.414119	0.678787	0.999943
ENSMUSG00000006360	Crip1	3.08657	0.536995	1.14163	0.470376	0.638086	NA
ENSMUSG00000006362	Cbfa2t3	531.909	0.121768	0.26538	0.458843	0.646347	0.999943
ENSMUSG00000006369	Fbln1	426.481	0.160839	0.122957	1.3081	0.190841	0.999943
ENSMUSG00000006373	Pgrmc1	16428.8	0.0420644	0.0787041	0.534463	0.593022	0.999943
ENSMUSG00000006378	Gcat	504.111	0.237643	0.126704	1.87558	0.0607123	0.999943
ENSMUSG00000006386	Tek	3.94826	-0.0855986	1.06739	-0.080194	0.936083	0.999943
ENSMUSG00000006390	Elovl1	141.936	0.0342981	0.237235	0.144574	0.885047	0.999943
ENSMUSG00000006392	Med8	557.044	0.169899	0.14169	1.19909	0.230495	0.999943
ENSMUSG00000006395	Hyi	86.7252	0.164794	0.252619	0.652341	0.514181	0.999943
ENSMUSG00000006398	Cdc20	45.5481	-1.08398	0.445196	-2.43483	0.0148986	0.961302
ENSMUSG00000006403	Adamts4	60.3531	-0.0289005	0.276827	-0.104399	0.916853	0.999943
ENSMUSG00000006411	Nectin4	16.5468	0.0701862	0.540383	0.129882	0.89666	0.999943
ENSMUSG00000006412	Pfdn2	1266.94	0.0278133	0.197373	0.140918	0.887935	0.999943
ENSMUSG00000006418	Rnf114	1296.6	0.0262925	0.131529	0.199899	0.841559	0.999943
ENSMUSG00000006423	Steep1	1065.24	0.0184247	0.17267	0.106705	0.915023	0.999943
ENSMUSG00000006435	Neurl1a	2237.21	-0.0379851	0.115345	-0.329317	0.741916	0.999943
ENSMUSG00000006442	Srm	1717.05	0.115718	0.107898	1.07247	0.283507	0.999943
ENSMUSG00000006445	Epha2	22.5014	-0.187267	0.529373	-0.353752	0.723525	0.999943
ENSMUSG00000006456	Rbm14	894.355	-0.0642926	0.131505	-0.488897	0.624915	0.999943
ENSMUSG00000006457	Actn3	63.5315	0.00665958	0.331785	0.020072	0.983986	0.999943
ENSMUSG00000006462	A530013C23Rik	1.45288	0.256665	1.83787	0.139654	0.888933	NA
ENSMUSG00000006463	Zdhhc24	589.981	-0.0486096	0.135808	-0.357928	0.720397	0.999943
ENSMUSG00000006464	Bbs1	1292.56	-0.0466933	0.104202	-0.448105	0.654077	0.999943
ENSMUSG00000006469	Slc34a3	0.665128	-1.36681	2.9734	-0.459678	0.645747	NA
ENSMUSG00000006471	Ndor1	403.462	-0.286456	0.307537	-0.931452	0.35162	0.999943
ENSMUSG00000006476	Nsmf	8301.95	-0.0274369	0.102722	-0.267099	0.789393	0.999943
ENSMUSG00000006494	Pdk1	3064.18	-0.126484	0.149152	-0.848023	0.396425	0.999943
ENSMUSG00000006498	Ptbp1	618.414	0.0248352	0.180299	0.137744	0.890443	0.999943
ENSMUSG00000006517	Mvd	5470.91	0.0294652	0.121206	0.243101	0.807927	0.999943
ENSMUSG00000006519	Cyba	14.4171	0.608484	0.656011	0.927551	0.35364	0.999943
ENSMUSG00000006522	Itih3	15.3368	1.09174	0.56213	1.94215	0.0521189	0.999943
ENSMUSG00000006526	Stimate	485.24	0.015497	0.164529	0.0941896	0.924959	0.999943
ENSMUSG00000006527	Sfmbt1	682.952	0.0652525	0.176454	0.369799	0.711532	0.999943
ENSMUSG00000006538	Ihh	4.25217	0.355138	1.02594	0.346159	0.729223	0.999943
ENSMUSG00000006542	Prkag3	1.19242	-0.237696	1.90464	-0.124799	0.900683	NA
ENSMUSG00000006546	Cryba2	1.00362	-0.68859	2.24825	-0.306278	0.759393	NA
ENSMUSG00000006567	Atp7b	70.1053	-0.0203396	0.279427	-0.0727903	0.941973	0.999943
ENSMUSG00000006575	Rundc3a	4470.1	-0.0174721	0.105552	-0.165531	0.868526	0.999943
ENSMUSG00000006576	Slc4a3	3396.57	0.0153874	0.11735	0.131125	0.895677	0.999943
ENSMUSG00000006585	Cdt1	66.3236	0.465954	0.301125	1.54738	0.121772	0.999943
ENSMUSG00000006586	Runx1t1	1558.58	0.000637819	0.212106	0.00300707	0.997601	0.999943
ENSMUSG00000006587	Snai3	0.743386	0.44611	2.86966	0.155458	0.876461	NA
ENSMUSG00000006589	Aprt	1077.42	0.238552	0.114253	2.08793	0.0368038	0.999943
ENSMUSG00000006599	Gtf2h1	997.026	0.0226508	0.135863	0.166717	0.867592	0.999943
ENSMUSG00000006611	Hfe	25.2306	0.84148	0.495816	1.69716	0.0896657	0.999943
ENSMUSG00000006638	Abhd1	56.5133	0.119158	0.608309	0.195884	0.844701	0.999943
ENSMUSG00000006641	Slc5a6	539.574	0.0434566	0.131476	0.33053	0.740999	0.999943
ENSMUSG00000006642	Tcf23	1.3447	0.337205	1.83932	0.183331	0.854538	NA
ENSMUSG00000006649	Nphs1	2.7309	-2.34303	1.55754	-1.50431	0.132501	NA
ENSMUSG00000006651	Aplp1	22307	0.0441209	0.138897	0.317651	0.75075	0.999943
ENSMUSG00000006673	Qrich1	1950.05	0.145667	0.12494	1.16589	0.24366	0.999943
ENSMUSG00000006675	P4htm	965.423	-0.388312	0.298514	-1.30082	0.193321	0.999943
ENSMUSG00000006676	Usp19	2468.17	0.0167846	0.133907	0.125345	0.90025	0.999943
ENSMUSG00000006678	Pola1	146.173	0.31873	0.236043	1.3503	0.176919	0.999943
ENSMUSG00000006699	Cdc42	10599.2	0.00970344	0.0957752	0.101315	0.919301	0.999943
ENSMUSG00000006705	Pknox1	435.752	-0.108615	0.154781	-0.701735	0.482844	0.999943
ENSMUSG00000006711	D130043K22Rik	1140.82	-0.0599912	0.154305	-0.388784	0.697436	0.999943
ENSMUSG00000006715	Gmnn	37.1554	0.472235	0.425529	1.10976	0.267102	0.999943
ENSMUSG00000006717	Acot13	479.323	-0.189446	0.200802	-0.943449	0.345451	0.999943
ENSMUSG00000006720	Zfp184	131.406	-0.00890682	0.272781	-0.0326519	0.973952	0.999943
ENSMUSG00000006724	Cyp27b1	11.5597	-0.176812	0.6856	-0.257893	0.796489	0.999943
ENSMUSG00000006728	Cdk4	1547.39	0.132333	0.108281	1.22212	0.221661	0.999943
ENSMUSG00000006731	B4galnt1	3095.7	0.0947456	0.102438	0.924907	0.355014	0.999943
ENSMUSG00000006732	Mettl1	367.314	0.0667572	0.185593	0.359697	0.719074	0.999943
ENSMUSG00000006736	Tspan31	1498.58	-0.380802	0.147971	-2.57349	0.0100678	0.819421
ENSMUSG00000006740	Kif5b	4722.43	-0.197111	0.207981	-0.947732	0.343266	0.999943
ENSMUSG00000006763	Saal1	289.998	0.116528	0.148558	0.784391	0.432811	0.999943
ENSMUSG00000006764	Tph2	8.6809	0.427748	0.75659	0.565363	0.571827	0.999943
ENSMUSG00000006777	Krt23	2.8303	0.360519	1.34644	0.267757	0.788887	NA
ENSMUSG00000006782	Cnp	414.285	-0.0815227	0.264386	-0.308348	0.757818	0.999943
ENSMUSG00000006784	Odad4	22.9604	0.158644	0.546797	0.290133	0.771714	0.999943
ENSMUSG00000006800	Sulf2	2915.48	0.313878	0.139202	2.25485	0.024143	0.999943
ENSMUSG00000006818	Sod2	4572.36	-0.0352081	0.0907074	-0.388151	0.697905	0.999943
ENSMUSG00000006850	Tmco6	283.33	0.0599185	0.153031	0.391546	0.695394	0.999943
ENSMUSG00000006906	Stambp	1283.85	0.22602	0.109349	2.06697	0.0387372	0.999943
ENSMUSG00000006920	Ezh1	1084.57	-0.0411521	0.114463	-0.359523	0.719204	0.999943
ENSMUSG00000006930	Hap1	3897.92	-0.128281	0.132592	-0.96749	0.333299	0.999943
ENSMUSG00000006931	P3h4	287.635	0.0402051	0.244338	0.164547	0.8693	0.999943
ENSMUSG00000006932	Ctnnb1	16382.8	-0.0630658	0.0894007	-0.705428	0.480544	0.999943
ENSMUSG00000006941	Eif1b	2124.48	0.0184412	0.116609	0.158146	0.874342	0.999943
ENSMUSG00000006958	Chrd	107.375	0.0686304	0.245014	0.280108	0.779395	0.999943
ENSMUSG00000006998	Psmd2	7893.08	-0.0753279	0.136299	-0.552667	0.580491	0.999943
ENSMUSG00000007021	Syngr3	7037.33	-0.0572317	0.121078	-0.472685	0.636438	0.999943
ENSMUSG00000007029	Vars	2411.51	0.171415	0.117381	1.46033	0.144199	0.999943
ENSMUSG00000007030	Vwa7	14.2166	0.254367	0.569189	0.446894	0.654951	0.999943
ENSMUSG00000007033	Hspa1l	55.4259	0.225135	0.351083	0.641257	0.521356	0.999943
ENSMUSG00000007034	Slc44a4	0.485015	1.0097	3.17846	0.317669	0.750736	NA
ENSMUSG00000007035	Msh5	8.82391	-0.0527098	0.754248	-0.0698839	0.944286	0.999943
ENSMUSG00000007036	Abhd16a	1222.04	0.0151381	0.122917	0.123157	0.901983	0.999943
ENSMUSG00000007038	Neu1	687.596	-0.072312	0.14061	-0.514273	0.607061	0.999943
ENSMUSG00000007039	Ddah2	1404.8	0.0137246	0.156115	0.0879135	0.929945	0.999943
ENSMUSG00000007041	Clic1	235.282	0.369169	0.173698	2.12535	0.0335577	0.999943
ENSMUSG00000007050	Lsm2	189.132	-0.113446	0.218457	-0.519306	0.603547	0.999943
ENSMUSG00000007080	Pole	58.2932	0.565324	0.387267	1.45978	0.144351	0.999943
ENSMUSG00000007097	Atp1a2	10474.6	0.189031	0.1312	1.44078	0.149646	0.999943
ENSMUSG00000007107	Atp1a4	0.690781	0.334531	2.53745	0.131838	0.895113	NA
ENSMUSG00000007122	Casq1	8.99619	0.0544172	0.735198	0.0740171	0.940997	0.999943
ENSMUSG00000007207	Stx1a	6637.33	0.00514572	0.114043	0.0451207	0.964011	0.999943
ENSMUSG00000007209	Ceacam9	1.22047	-0.137081	1.89958	-0.0721642	0.942471	NA
ENSMUSG00000007216	Zfp775	305.495	0.173254	0.156463	1.10731	0.268158	0.999943
ENSMUSG00000007279	Scube2	24.2839	-0.54836	0.444855	-1.23267	0.217699	0.999943
ENSMUSG00000007338	Mrpl49	695.235	0.00853776	0.127074	0.0671873	0.946433	0.999943
ENSMUSG00000007379	Dennd2c	19.5109	0.207273	0.608767	0.34048	0.733495	0.999943
ENSMUSG00000007411	Mark3	3354.93	-0.192669	0.114409	-1.68403	0.0921753	0.999943
ENSMUSG00000007415	Gatad1	1713.04	0.0956719	0.0994563	0.961949	0.336075	0.999943
ENSMUSG00000007440	Pcdha10	376.027	-0.20383	0.133468	-1.52719	0.126715	0.999943
ENSMUSG00000007458	M6pr	1134.9	0.124607	0.100992	1.23384	0.217264	0.999943
ENSMUSG00000007476	Lrrc8a	1577.35	0.232903	0.119746	1.94497	0.0517785	0.999943
ENSMUSG00000007480	Mc5r	10.1463	0.835775	0.750587	1.1135	0.265496	0.999943
ENSMUSG00000007564	Ppp2r1a	20148.4	0.078726	0.118835	0.662479	0.507664	0.999943
ENSMUSG00000007570	Fance	534.093	0.0806711	0.240475	0.335466	0.737273	0.999943
ENSMUSG00000007589	Tinf2	240.531	-0.0557824	0.278977	-0.199953	0.841517	0.999943
ENSMUSG00000007591	Tssk4	2.66518	-0.187779	1.23489	-0.152061	0.879139	NA
ENSMUSG00000007594	Hapln4	43.1087	-0.122391	0.468863	-0.261037	0.794064	0.999943
ENSMUSG00000007603	Dus3l	1098.42	-0.0382216	0.125974	-0.303409	0.761578	0.999943
ENSMUSG00000007610	Gtpbp3	343.629	0.00706078	0.169965	0.0415426	0.966863	0.999943
ENSMUSG00000007613	Tgfbr1	402.346	-0.0160165	0.16474	-0.0972228	0.922549	0.999943
ENSMUSG00000007617	Homer1	2365.41	-0.246143	0.184139	-1.33673	0.181311	0.999943
ENSMUSG00000007646	Rad51c	96.9372	0.0728471	0.268672	0.271137	0.786286	0.999943
ENSMUSG00000007653	Gabrb2	2173.32	-0.0931529	0.250365	-0.372069	0.709842	0.999943
ENSMUSG00000007655	Cav1	468.334	-0.306302	0.247755	-1.23631	0.216343	0.999943
ENSMUSG00000007656	Arpp19	3390.8	0.0551127	0.112276	0.490866	0.623521	0.999943
ENSMUSG00000007659	Bcl2l1	2298.5	-0.00309437	0.0888362	-0.0348323	0.972213	0.999943
ENSMUSG00000007670	Khsrp	2904.02	0.148544	0.100037	1.48489	0.137573	0.999943
ENSMUSG00000007682	Dio2	1863.61	0.139512	0.167402	0.833396	0.404621	0.999943
ENSMUSG00000007721	Ccdc124	1189.63	-0.00202063	0.144491	-0.0139844	0.988842	0.999943
ENSMUSG00000007739	Cct4	3762.04	-0.00825846	0.102563	-0.0805208	0.935823	0.999943
ENSMUSG00000007777	0610009B22Rik	238.666	-0.22989	0.180955	-1.27043	0.203933	0.999943
ENSMUSG00000007783	Cpt1c	1777.04	-0.0491756	0.114761	-0.428504	0.668284	0.999943
ENSMUSG00000007805	Twist2	26.845	-0.274667	0.420469	-0.653239	0.513602	0.999943
ENSMUSG00000007812	Zfp655	644.136	-0.0358252	0.127822	-0.280274	0.779267	0.999943
ENSMUSG00000007815	Rhoa	3882.87	-0.0155536	0.145345	-0.107011	0.91478	0.999943
ENSMUSG00000007817	Zmiz1	5688.09	0.0636799	0.17937	0.35502	0.722575	0.999943
ENSMUSG00000007827	Ankrd26	415.024	-0.542617	0.292927	-1.85239	0.0639694	0.999943
ENSMUSG00000007833	Aldh16a1	94.2496	0.883347	0.50633	1.74461	0.0810532	0.999943
ENSMUSG00000007836	Hnrnpa0	4245.47	0.0430792	0.0903743	0.476675	0.633594	0.999943
ENSMUSG00000007837	Prrg2	165.754	0.234338	0.197077	1.18907	0.234413	0.999943
ENSMUSG00000007850	Hnrnph1	4617.51	0.0772009	0.0987565	0.78173	0.434373	0.999943
ENSMUSG00000007867	Ift43	149.303	-0.374839	0.204036	-1.83712	0.0661919	0.999943
ENSMUSG00000007872	Id3	22.7434	0.734761	0.624608	1.17636	0.239452	0.999943
ENSMUSG00000007877	Tcap	3.09118	0.319126	1.16273	0.274462	0.783729	0.999943
ENSMUSG00000007880	Arid1a	3816.42	0.0757028	0.19425	0.389719	0.696744	0.999943
ENSMUSG00000007888	Crlf1	335.801	-0.171941	0.173999	-0.988171	0.323069	0.999943
ENSMUSG00000007891	Ctsd	5530.3	0.159524	0.110877	1.43875	0.150222	0.999943
ENSMUSG00000007892	Rplp1	10959.3	-0.0405356	0.165515	-0.244906	0.806529	0.999943
ENSMUSG00000007908	Hmgcll1	401.644	0.182952	0.188509	0.97052	0.331787	0.999943
ENSMUSG00000007944	Ttc9b	2333.75	0.058023	0.129331	0.44864	0.653691	0.999943
ENSMUSG00000007946	Phox2a	2.13417	-0.117288	1.59475	-0.0735466	0.941371	NA
ENSMUSG00000007950	Abhd8	3505	-0.0367917	0.112388	-0.327362	0.743394	0.999943
ENSMUSG00000007987	Ift22	1020.8	-0.0514732	0.144653	-0.355839	0.721961	0.999943
ENSMUSG00000007989	Fzd3	5643.7	0.128609	0.270548	0.475366	0.634526	0.999943
ENSMUSG00000008028	1700008O03Rik	33.1718	-1.02103	0.440829	-2.31615	0.0205501	0.999943
ENSMUSG00000008035	Mid1ip1	1695.8	0.0499626	0.0964171	0.518192	0.604324	0.999943
ENSMUSG00000008036	Ap2s1	4047.13	-0.0317771	0.134438	-0.23637	0.813145	0.999943
ENSMUSG00000008090	Fgfrl1	393.035	-0.226402	0.210574	-1.07517	0.282301	0.999943
ENSMUSG00000008129	Brme1	56.8936	-0.0338683	0.641752	-0.0527747	0.957911	0.999943
ENSMUSG00000008136	Fhl2	193.411	-0.165919	0.34523	-0.480603	0.630799	0.999943
ENSMUSG00000008140	Emc10	4434.04	0.1399	0.149683	0.934638	0.349975	0.999943
ENSMUSG00000008153	Clstn3	9313.25	-0.00349412	0.110222	-0.0317008	0.974711	0.999943
ENSMUSG00000008167	Fbxw9	1293.48	-0.0996103	0.113318	-0.879033	0.379383	0.999943
ENSMUSG00000008193	Spib	1.1068	-2.29353	2.16576	-1.059	0.289602	NA
ENSMUSG00000008200	Fnbp4	1124.34	-0.155266	0.140059	-1.10858	0.267612	0.999943
ENSMUSG00000008206	Cers4	1325.45	-0.265188	0.118831	-2.23163	0.0256393	0.999943
ENSMUSG00000008226	Scrn3	401.546	0.0135618	0.156475	0.0866711	0.930933	0.999943
ENSMUSG00000008301	Phax	905.028	0.108951	0.143201	0.760824	0.446762	0.999943
ENSMUSG00000008305	Tle1	1599.65	-0.122909	0.0973604	-1.26241	0.206802	0.999943
ENSMUSG00000008307	1700109H08Rik	29.2867	-1.90829	0.831722	-2.29439	0.0217682	0.999943
ENSMUSG00000008318	Relt	158.526	-0.371372	0.251843	-1.47462	0.140316	0.999943
ENSMUSG00000008333	Snrpb2	736.987	0.0533336	0.1337	0.398906	0.689963	0.999943
ENSMUSG00000008348	Ubc	28888.6	-0.0802707	0.10502	-0.764335	0.444668	0.999943
ENSMUSG00000008373	Prpf31	831.963	-0.085417	0.115793	-0.737669	0.460716	0.999943
ENSMUSG00000008384	Sertad1	53.7337	-0.267213	0.363182	-0.735755	0.46188	0.999943
ENSMUSG00000008393	Carhsp1	1199.89	0.0866434	0.115105	0.752731	0.451612	0.999943
ENSMUSG00000008398	Elk3	160.921	-0.0645778	0.300466	-0.214925	0.829826	0.999943
ENSMUSG00000008429	Herpud2	1435.21	0.0848343	0.103887	0.816604	0.414155	0.999943
ENSMUSG00000008435	Rdh13	943.901	-0.215935	0.173772	-1.24264	0.214002	0.999943
ENSMUSG00000008438	Adam21	7.3938	0.820285	0.789792	1.03861	0.298987	0.999943
ENSMUSG00000008450	Nutf2	273.131	0.105306	0.242787	0.433737	0.664479	0.999943
ENSMUSG00000008461	Fut1	14.37	-1.84549	0.846684	-2.17967	0.0292819	0.999943
ENSMUSG00000008475	Arpc5	6276.68	-0.0839582	0.104757	-0.801455	0.422868	0.999943
ENSMUSG00000008489	Elavl2	2056.14	-0.108223	0.157166	-0.688589	0.491082	0.999943
ENSMUSG00000008496	Pou2f2	114.957	-0.27898	0.346738	-0.804583	0.42106	0.999943
ENSMUSG00000008540	Mgst1	237.447	0.276547	0.157452	1.75639	0.0790212	0.999943
ENSMUSG00000008575	Nfib	3398.34	-0.108144	0.18047	-0.599239	0.549014	0.999943
ENSMUSG00000008601	Rab25	1.00194	0.00868334	2.01204	0.00431568	0.996557	NA
ENSMUSG00000008604	Ubqln4	2656.23	0.0391681	0.112425	0.348393	0.727545	0.999943
ENSMUSG00000008658	Rbfox1	3151.78	-0.0737452	0.125695	-0.586698	0.557407	0.999943
ENSMUSG00000008668	Rps18	5303.5	0.104467	0.160772	0.649785	0.515831	0.999943
ENSMUSG00000008682	Rpl10	3392.93	-0.222177	0.458418	-0.484661	0.627917	0.999943
ENSMUSG00000008683	Rps15a	3347.12	-0.0631017	0.151104	-0.417605	0.676236	0.999943
ENSMUSG00000008690	Ncaph2	2634.18	0.125153	0.0966916	1.29436	0.195542	0.999943
ENSMUSG00000008730	Hipk1	2117.35	-0.320536	0.229855	-1.39451	0.163163	0.999943
ENSMUSG00000008734	Gprc5b	1343.33	0.0851982	0.140657	0.605716	0.544704	0.999943
ENSMUSG00000008763	Man1a2	3014.83	-0.39865	0.444492	-0.896867	0.36979	0.999943
ENSMUSG00000008822	Acyp1	234.81	0.0157511	0.186504	0.0844545	0.932695	0.999943
ENSMUSG00000008855	Hdac5	3924.8	-0.0226252	0.127172	-0.177911	0.858793	0.999943
ENSMUSG00000008859	Rala	4438.21	-0.0987921	0.126818	-0.779006	0.435976	0.999943
ENSMUSG00000008892	Vdac3	5832.5	0.0648943	0.105161	0.617097	0.537171	0.999943
ENSMUSG00000008932	Slc1a7	2.44787	-1.24432	1.43583	-0.86662	0.38615	NA
ENSMUSG00000008958	Vps72	657.65	0.0645121	0.163259	0.395152	0.692731	0.999943
ENSMUSG00000008976	Gabpa	773.812	-0.165427	0.254148	-0.650906	0.515107	0.999943
ENSMUSG00000008999	Bmp7	215.882	0.128183	0.193955	0.660892	0.508682	0.999943
ENSMUSG00000009013	Dynll1	4324.81	-0.0206626	0.134265	-0.153894	0.877694	0.999943
ENSMUSG00000009030	Pdcl	797.375	0.0698046	0.164709	0.423806	0.671707	0.999943
ENSMUSG00000009035	Tmem184b	1637.81	-0.155966	0.122109	-1.27727	0.201507	0.999943
ENSMUSG00000009070	Rsph14	1.60218	-4.00432	2.08628	-1.91936	0.0549384	NA
ENSMUSG00000009073	Nf2	5613.41	0.079546	0.0922044	0.862713	0.388295	0.999943
ENSMUSG00000009075	Cabp7	103.156	0.147992	0.252274	0.586631	0.557452	0.999943
ENSMUSG00000009076	Zmat5	307.204	-0.0758694	0.179373	-0.42297	0.672317	0.999943
ENSMUSG00000009079	Ewsr1	3082.59	-0.195013	0.213134	-0.914977	0.360204	0.999943
ENSMUSG00000009090	Ap1b1	4060.17	-0.0776883	0.137775	-0.56388	0.572836	0.999943
ENSMUSG00000009092	Derl3	21.3864	-0.446686	0.622445	-0.717632	0.472984	0.999943
ENSMUSG00000009108	Gnat2	8.82606	0.1425	0.754826	0.188785	0.850261	0.999943
ENSMUSG00000009112	Bcl2l13	1690.12	0.166323	0.131388	1.26589	0.205551	0.999943
ENSMUSG00000009115	Spatc1l	0.869362	-0.495304	2.36963	-0.209022	0.834431	NA
ENSMUSG00000009145	Dqx1	2.69681	0.335354	1.35028	0.248358	0.803858	NA
ENSMUSG00000009207	Lnpk	1054.51	0.0421487	0.200252	0.210479	0.833294	0.999943
ENSMUSG00000009214	Mymk	19.0073	0.229656	0.570376	0.40264	0.687213	0.999943
ENSMUSG00000009216	Fam163b	4109.22	0.130901	0.106184	1.23277	0.21766	0.999943
ENSMUSG00000009246	Trpm5	8.87199	-0.773229	0.812297	-0.951904	0.341145	0.999943
ENSMUSG00000009248	Ascl2	4.8335	-0.698122	1.08958	-0.640723	0.521703	0.999943
ENSMUSG00000009281	Rarres2	23.7349	-0.142729	0.428837	-0.332827	0.739265	0.999943
ENSMUSG00000009291	Pttg1ip	1543.71	0.162671	0.146484	1.11051	0.26678	0.999943
ENSMUSG00000009292	Trpm2	757.13	0.0144885	0.194367	0.074542	0.940579	0.999943
ENSMUSG00000009293	Ube2g2	1119.84	0.00377289	0.168734	0.0223599	0.982161	0.999943
ENSMUSG00000009350	Mpo	1.06976	-0.771765	2.36703	-0.326049	0.744388	NA
ENSMUSG00000009356	Lpo	21.2351	-1.05405	0.964853	-1.09244	0.274638	0.999943
ENSMUSG00000009376	Met	7310.36	-0.0156535	0.170878	-0.0916061	0.927011	0.999943
ENSMUSG00000009378	Slc16a12	3.37154	-1.50001	1.23808	-1.21156	0.225679	0.999943
ENSMUSG00000009394	Syn2	13044.4	-0.0143051	0.0766566	-0.186612	0.851965	0.999943
ENSMUSG00000009406	Elk1	753.789	0.0673506	0.112134	0.600624	0.54809	0.999943
ENSMUSG00000009418	Nav1	10661.3	0.0692834	0.232783	0.29763	0.765985	0.999943
ENSMUSG00000009470	Tnpo1	2246.85	0.0113697	0.195554	0.0581408	0.953636	0.999943
ENSMUSG00000009487	Otog	4.19682	0.545171	1.14273	0.477079	0.633306	0.999943
ENSMUSG00000009535	Rnmt	2751.49	-0.0946826	0.130337	-0.726444	0.467566	0.999943
ENSMUSG00000009545	Kcnq1	15.0107	-1.42991	0.977101	-1.46342	0.143352	0.999943
ENSMUSG00000009549	Srp14	1752.26	0.109449	0.123989	0.882735	0.377379	0.999943
ENSMUSG00000009551	6330409D20Rik	41.2172	-0.391174	0.35215	-1.11082	0.266647	0.999943
ENSMUSG00000009555	Cdk9	1351.73	-0.086883	0.146339	-0.593712	0.552705	0.999943
ENSMUSG00000009563	Tor2a	573.307	0.411061	0.273371	1.50367	0.132665	0.999943
ENSMUSG00000009566	Fpgs	216.257	0.0835831	0.236136	0.353962	0.723367	0.999943
ENSMUSG00000009569	Mrtfb	1946.31	-0.104061	0.167423	-0.621547	0.53424	0.999943
ENSMUSG00000009575	Cbx5	5426.49	-0.0828267	0.154868	-0.534823	0.592772	0.999943
ENSMUSG00000009585	Apobec3	29.3552	-0.685025	0.410963	-1.66688	0.0955383	0.999943
ENSMUSG00000009596	Taf7l	15.4018	0.229489	0.582776	0.393786	0.693739	0.999943
ENSMUSG00000009614	Sardh	574.528	0.399246	0.259664	1.53755	0.124159	0.999943
ENSMUSG00000009621	Vav2	2043.14	0.067357	0.111569	0.603724	0.546027	0.999943
ENSMUSG00000009628	Tex15	178.645	0.255434	0.214327	1.1918	0.233341	0.999943
ENSMUSG00000009630	Ppp2cb	2309.77	-0.00779967	0.104889	-0.074361	0.940723	0.999943
ENSMUSG00000009633	G0s2	28.5555	-0.219831	0.422924	-0.519789	0.60321	0.999943
ENSMUSG00000009640	Dmap1	575.175	-0.0632549	0.13165	-0.480477	0.630888	0.999943
ENSMUSG00000009647	Mcu	1684.87	0.0157765	0.108013	0.146061	0.883873	0.999943
ENSMUSG00000009654	Oit3	0.794784	-0.227864	2.79819	-0.0814328	0.935098	NA
ENSMUSG00000009670	Tex11	9.72394	-0.0602849	0.742578	-0.0811832	0.935296	0.999943
ENSMUSG00000009681	Bcr	3300.78	0.000246412	0.131877	0.0018685	0.998509	0.999943
ENSMUSG00000009687	Fxyd5	31.0126	0.0220777	0.404681	0.0545559	0.956492	0.999943
ENSMUSG00000009731	Kcnd1	448.544	0.0350665	0.162846	0.215335	0.829506	0.999943
ENSMUSG00000009733	Tfcp2	727.336	0.0977087	0.151536	0.644788	0.519065	0.999943
ENSMUSG00000009734	Pou6f2	7.91279	-0.687103	0.927927	-0.740471	0.459014	0.999943
ENSMUSG00000009739	Pou6f1	1829.17	-0.00417143	0.157795	-0.0264357	0.97891	0.999943
ENSMUSG00000009741	Ubp1	1468.3	0.00227702	0.115429	0.0197266	0.984261	0.999943
ENSMUSG00000009772	Nuak2	110.804	0.266363	0.217997	1.22187	0.221758	0.999943
ENSMUSG00000009828	Cilk1	1215.68	0.0353487	0.133983	0.263829	0.791912	0.999943
ENSMUSG00000009863	Sdhb	3240.9	0.0462315	0.0998445	0.463035	0.643339	0.999943
ENSMUSG00000009876	Cox4i2	3.88908	0.890159	1.0762	0.827131	0.408163	0.999943
ENSMUSG00000009894	Snap47	7824.32	-0.00337831	0.0979159	-0.0345021	0.972477	0.999943
ENSMUSG00000009900	Wnt3a	1.50972	0.593041	1.99534	0.297212	0.766304	NA
ENSMUSG00000009905	Kdsr	825.07	-0.16374	0.140576	-1.16478	0.244108	0.999943
ENSMUSG00000009907	Vps4b	1002.25	-0.0927195	0.103712	-0.894013	0.371315	0.999943
ENSMUSG00000009927	Rps25	2589.99	0.0469869	0.126269	0.372119	0.709804	0.999943
ENSMUSG00000009941	Nxf2	5.04177	1.19866	0.982055	1.22056	0.222252	0.999943
ENSMUSG00000009995	Tafazzin	461.125	-0.264064	0.174702	-1.51151	0.130658	0.999943
ENSMUSG00000010021	Kif19a	25.7593	-0.57965	0.615455	-0.941824	0.346283	0.999943
ENSMUSG00000010025	Aldh3a2	1542.62	-0.0210074	0.105403	-0.199306	0.842024	0.999943
ENSMUSG00000010044	Zmynd10	60.4548	-0.0165075	0.418805	-0.0394158	0.968559	0.999943
ENSMUSG00000010045	Tmem115	970.184	0.12438	0.119649	1.03953	0.298557	0.999943
ENSMUSG00000010047	Hyal2	324.656	0.10931	0.244932	0.446286	0.65539	0.999943
ENSMUSG00000010048	Ifrd2	128.682	0.415537	0.311449	1.3342	0.182137	0.999943
ENSMUSG00000010051	Hyal1	141.272	-0.27591	0.205012	-1.34583	0.178359	0.999943
ENSMUSG00000010054	Tusc2	1540.91	0.200971	0.10273	1.95631	0.0504285	0.999943
ENSMUSG00000010057	Nprl2	487.093	-0.022698	0.180701	-0.125611	0.90004	0.999943
ENSMUSG00000010064	Slc38a3	2691.95	-0.00652052	0.118846	-0.0548653	0.956246	0.999943
ENSMUSG00000010066	Cacna2d2	966.833	-0.153873	0.169994	-0.90517	0.365376	0.999943
ENSMUSG00000010067	Rassf1	380.238	-0.38595	0.149589	-2.58007	0.00987789	0.819421
ENSMUSG00000010080	Epn3	8.09133	0.264922	0.808435	0.327697	0.743141	0.999943
ENSMUSG00000010086	Rnf112	1308.11	-0.136836	0.133329	-1.0263	0.304749	0.999943
ENSMUSG00000010095	Slc3a2	11318	0.186857	0.0892147	2.09446	0.0362188	0.999943
ENSMUSG00000010097	Nxf1	1671.2	0.00175164	0.0973271	0.0179974	0.985641	0.999943
ENSMUSG00000010110	Stx5a	967.474	-0.115626	0.176121	-0.656514	0.511493	0.999943
ENSMUSG00000010136	Pifo	11.4024	0.591979	0.624125	0.948493	0.342878	0.999943
ENSMUSG00000010154	Spire2	532.045	0.0657653	0.138793	0.473838	0.635616	0.999943
ENSMUSG00000010175	Prox1	127.536	0.0368604	0.294479	0.125171	0.900388	0.999943
ENSMUSG00000010205	Raver1	928.654	-0.161559	0.115934	-1.39354	0.163457	0.999943
ENSMUSG00000010277	2610507B11Rik	6182.8	-0.0154026	0.117281	-0.13133	0.895514	0.999943
ENSMUSG00000010290	AI597479	983.696	-0.0130931	0.0972785	-0.134594	0.892933	0.999943
ENSMUSG00000010307	Tmem86a	304.883	-0.0876255	0.190296	-0.46047	0.645179	0.999943
ENSMUSG00000010311	Optc	97.5216	0.181249	0.250073	0.724782	0.468586	0.999943
ENSMUSG00000010342	Tex14	5.54201	-2.52804	1.17007	-2.1606	0.0307264	0.999943
ENSMUSG00000010358	Ifi35	4.14001	-0.508161	1.04815	-0.484819	0.627805	0.999943
ENSMUSG00000010362	Rdm1	67.25	0.291686	0.318163	0.91678	0.359258	0.999943
ENSMUSG00000010376	Nedd8	1881.31	0.0563897	0.157762	0.357435	0.720766	0.999943
ENSMUSG00000010392	Gosr1	1205.89	-0.325944	0.129488	-2.51717	0.0118302	0.889077
ENSMUSG00000010406	Mrpl52	479.87	-0.149394	0.200494	-0.745126	0.456196	0.999943
ENSMUSG00000010453	Kansl3	2212.86	-0.191943	0.246294	-0.779326	0.435788	0.999943
ENSMUSG00000010461	Eya4	44.9875	-0.3513	0.349033	-1.0065	0.314177	0.999943
ENSMUSG00000010476	Ebf3	16.0135	0.14971	0.66609	0.22476	0.822166	0.999943
ENSMUSG00000010492	Uckl1os	29.6474	0.190455	2.63882	0.0721742	0.942463	0.999943
ENSMUSG00000010505	Myt1	288.28	-0.639695	0.351975	-1.81744	0.069149	0.999943
ENSMUSG00000010517	Faf1	1228.12	-0.0118621	0.135537	-0.0875197	0.930258	0.999943
ENSMUSG00000010529	Gm266	6.08056	0.000871683	0.82845	0.00105219	0.99916	0.999943
ENSMUSG00000010538	Tsacc	20.8965	0.174191	0.471471	0.369463	0.711783	0.999943
ENSMUSG00000010554	Mettl16	990.758	0.00752574	0.128933	0.0583692	0.953455	0.999943
ENSMUSG00000010592	Dazl	55.7301	0.181307	0.408024	0.444353	0.656787	0.999943
ENSMUSG00000010601	Apol7a	5.54549	-1.66377	0.922537	-1.80347	0.0713137	0.999943
ENSMUSG00000010607	Pigyl	308.633	0.0550599	0.175173	0.314317	0.75328	0.999943
ENSMUSG00000010608	Rbm25	1886	-0.0493562	0.15473	-0.318983	0.74974	0.999943
ENSMUSG00000010609	Psen2	626.398	0.0158956	0.29571	0.053754	0.957131	0.999943
ENSMUSG00000010651	Acaa1b	9.25766	-0.635205	0.684749	-0.927647	0.353591	0.999943
ENSMUSG00000010660	Plcd1	181.386	-0.0427155	0.185205	-0.230639	0.817595	0.999943
ENSMUSG00000010663	Fads1	10698	0.0157512	0.0784865	0.200687	0.840943	0.999943
ENSMUSG00000010721	Lmbr1	1800.68	-0.0601789	0.116967	-0.514493	0.606907	0.999943
ENSMUSG00000010751	Tnfrsf22	97.4398	0.0352189	0.369045	0.0954324	0.923971	0.999943
ENSMUSG00000010755	Cars	3479.78	0.0414406	0.141828	0.292188	0.770143	0.999943
ENSMUSG00000010760	Phlda2	0.748099	0.573006	2.87051	0.199618	0.841779	NA
ENSMUSG00000010796	Asz1	0.693072	-0.278204	2.88521	-0.0964241	0.923184	NA
ENSMUSG00000010797	Wnt2	72.2465	-0.0480703	0.261181	-0.18405	0.853974	0.999943
ENSMUSG00000010803	Gabra1	1517.89	-0.0603491	0.158874	-0.379855	0.704053	0.999943
ENSMUSG00000010825	Grid2ip	95.6805	0.0287651	0.369623	0.077823	0.937969	0.999943
ENSMUSG00000010830	Kdelr3	58.3484	0.451385	0.326555	1.38226	0.166891	0.999943
ENSMUSG00000010911	Apip	392.02	0.0358808	0.224279	0.159983	0.872895	0.999943
ENSMUSG00000010914	Pdhx	1489.87	-0.0768196	0.104159	-0.737522	0.460805	0.999943
ENSMUSG00000010936	Vac14	1259.4	0.12996	0.109803	1.18357	0.236583	0.999943
ENSMUSG00000011008	Mcoln2	1.11127	2.2156	2.34235	0.945885	0.344207	NA
ENSMUSG00000011034	Slc5a1	1.14278	-1.08368	1.93397	-0.560339	0.575248	NA
ENSMUSG00000011096	Akt1s1	1371.96	0.0974983	0.138451	0.704206	0.481305	0.999943
ENSMUSG00000011114	Tbrg1	1246.79	0.185962	0.120231	1.54671	0.121934	0.999943
ENSMUSG00000011118	Panx3	1.80417	-0.299324	1.82769	-0.163772	0.86991	NA
ENSMUSG00000011148	Adssl1	36.7277	-0.462898	0.378788	-1.22205	0.221688	0.999943
ENSMUSG00000011154	Cfap161	17.5159	-0.286626	0.664438	-0.431381	0.666192	0.999943
ENSMUSG00000011158	Brf1	844.11	-0.0499172	0.133185	-0.374797	0.707811	0.999943
ENSMUSG00000011171	Vipr2	94.9264	0.21207	0.3712	0.571309	0.56779	0.999943
ENSMUSG00000011179	Odc1	5189.17	-0.10652	0.136013	-0.783158	0.433534	0.999943
ENSMUSG00000011254	Thg1l	163.186	-0.306121	0.215385	-1.42128	0.155237	0.999943
ENSMUSG00000011256	Adam19	1208.43	0.102461	0.094101	1.08884	0.276226	0.999943
ENSMUSG00000011257	Pabpc4	1972.43	0.073293	0.144715	0.506463	0.612532	0.999943
ENSMUSG00000011263	Exoc3l2	39.8364	-0.0656276	0.353458	-0.185673	0.852701	0.999943
ENSMUSG00000011267	Zfp296	9.18909	-0.0328623	0.675679	-0.0486359	0.961209	0.999943
ENSMUSG00000011305	Plin5	21.6008	0.376688	0.493623	0.763109	0.445398	0.999943
ENSMUSG00000011306	Sugp1	833.233	0.0108436	0.106384	0.101928	0.918814	0.999943
ENSMUSG00000011349	Dmrtc2	0.949312	-0.863787	2.05053	-0.42125	0.673573	NA
ENSMUSG00000011382	Dhdh	75.5707	0.183795	0.338685	0.542671	0.587356	0.999943
ENSMUSG00000011427	Zfp790	435.231	-0.243174	0.246646	-0.985924	0.32417	0.999943
ENSMUSG00000011463	Cpb1	7.24924	0.389888	0.934179	0.41736	0.676415	0.999943
ENSMUSG00000011486	Slc25a41	1.68966	-0.896842	1.72165	-0.520921	0.602422	NA
ENSMUSG00000011589	Fsd1	1336.64	-0.117417	0.144547	-0.812309	0.416615	0.999943
ENSMUSG00000011632	Pinlyp	0.608725	0.216859	2.98733	0.0725928	0.94213	NA
ENSMUSG00000011658	Fuz	156.304	-0.49547	0.28992	-1.70899	0.0874532	0.999943
ENSMUSG00000011751	Sptbn4	2362.62	-0.0796124	0.0964596	-0.825344	0.409176	0.999943
ENSMUSG00000011752	Pgam1	15487.6	0.0114039	0.122976	0.0927332	0.926116	0.999943
ENSMUSG00000011831	Evi5	1994.12	-0.0900594	0.219723	-0.409876	0.681897	0.999943
ENSMUSG00000011832	Evi5l	3991.77	-0.0603064	0.158233	-0.381124	0.703111	0.999943
ENSMUSG00000011837	Snapc2	642.731	0.0403596	0.162993	0.247615	0.804432	0.999943
ENSMUSG00000011877	Git1	5340.76	-0.0816202	0.0902299	-0.904581	0.365688	0.999943
ENSMUSG00000011884	Gltp	331.587	0.334105	0.174963	1.90958	0.0561877	0.999943
ENSMUSG00000011958	Bnip2	646.891	-0.114972	0.145598	-0.789659	0.429727	0.999943
ENSMUSG00000011960	Ccnt1	1390.6	-0.734378	0.162795	-4.51105	6.45085e-06	0.0110928
ENSMUSG00000012017	Scarf2	158.244	-0.0831217	0.326501	-0.254583	0.799045	0.999943
ENSMUSG00000012076	Brms1l	1627.04	-0.234777	0.172634	-1.35997	0.173841	0.999943
ENSMUSG00000012114	Med15	1631.85	0.253758	0.118549	2.14053	0.0323117	0.999943
ENSMUSG00000012117	Dhdds	1651.56	0.0786442	0.124325	0.632568	0.527016	0.999943
ENSMUSG00000012123	Crybg2	67.5014	0.59733	0.524714	1.13839	0.254957	0.999943
ENSMUSG00000012126	Ubxn11	86.0647	0.657784	0.52056	1.26361	0.206371	0.999943
ENSMUSG00000012211	Tex22	0.692416	0.593701	2.95876	0.200659	0.840965	NA
ENSMUSG00000012296	Tjap1	249.723	0.274199	0.333853	0.821317	0.411466	0.999943
ENSMUSG00000012350	Ehf	2.49664	1.34045	1.98162	0.676442	0.49876	NA
ENSMUSG00000012396	Nanog	3.9266	0.545462	1.2275	0.444368	0.656776	0.999943
ENSMUSG00000012405	Rpl15	3754.71	-0.196243	0.19837	-0.989275	0.322529	0.999943
ENSMUSG00000012422	Tmem167	2029.51	0.115021	0.0964787	1.19219	0.233187	0.999943
ENSMUSG00000012429	Mplkip	233.713	0.119767	0.164401	0.728504	0.466305	0.999943
ENSMUSG00000012443	Kif11	67.315	-0.300374	0.279652	-1.0741	0.282778	0.999943
ENSMUSG00000012483	Rpa3	143.615	0.38797	0.215288	1.8021	0.0715304	0.999943
ENSMUSG00000012535	Tnpo3	3045.41	-0.107891	0.128705	-0.838281	0.401873	0.999943
ENSMUSG00000012609	Ttll5	544.471	0.00699187	0.133436	0.0523987	0.958211	0.999943
ENSMUSG00000012640	Zfp715	603.334	-0.25125	0.21559	-1.1654	0.243856	0.999943
ENSMUSG00000012705	Retn	14.3683	-0.762783	0.548552	-1.39054	0.164365	0.999943
ENSMUSG00000012819	Cdh23	23.0974	-2.19201	0.823692	-2.6612	0.00778636	0.728033
ENSMUSG00000012848	Rps5	4357.05	0.142628	0.127432	1.11925	0.263035	0.999943
ENSMUSG00000012889	Podnl1	0.464269	-0.50787	3.22941	-0.157264	0.875037	NA
ENSMUSG00000013033	Adgrl1	17543.1	0.119438	0.118031	1.01192	0.311575	0.999943
ENSMUSG00000013076	Amotl1	897.87	0.176119	0.113346	1.55382	0.120227	0.999943
ENSMUSG00000013089	Etv5	1650.95	-0.137391	0.122301	-1.12339	0.261272	0.999943
ENSMUSG00000013091	Tmem190	3.01731	0.505732	1.38135	0.366113	0.71428	NA
ENSMUSG00000013150	Gfod2	1254.05	0.000125703	0.136366	0.0009218	0.999265	0.999943
ENSMUSG00000013155	Enkd1	294.939	0.0726453	0.152636	0.47594	0.634117	0.999943
ENSMUSG00000013158	4933405L10Rik	11.1893	0.102815	0.783538	0.131219	0.895602	0.999943
ENSMUSG00000013160	Atp6v0d1	5598.87	0.0112723	0.101239	0.111343	0.911344	0.999943
ENSMUSG00000013236	Ptprs	15808.3	-0.0459626	0.101375	-0.453392	0.650266	0.999943
ENSMUSG00000013275	Slc41a1	2105.47	0.0549612	0.100748	0.545533	0.585387	0.999943
ENSMUSG00000013353	4931406B18Rik	1.20129	0.68042	2.1027	0.323593	0.746246	NA
ENSMUSG00000013367	Iglon5	1349.18	0.0671384	0.114266	0.587562	0.556826	0.999943
ENSMUSG00000013415	Igf2bp1	16.7695	-0.388617	0.557765	-0.69674	0.485966	0.999943
ENSMUSG00000013418	B4galnt2	2.01317	-0.316601	1.65569	-0.19122	0.848353	NA
ENSMUSG00000013419	Zfp651	2956.56	0.0700608	0.105596	0.66348	0.507023	0.999943
ENSMUSG00000013465	Nelfb	1357.65	0.146659	0.129668	1.13103	0.258041	0.999943
ENSMUSG00000013483	Card14	8.5097	-0.567659	0.762989	-0.743994	0.45688	0.999943
ENSMUSG00000013495	Tmem175	866.125	-0.0277885	0.117072	-0.237364	0.812375	0.999943
ENSMUSG00000013523	Bcas1	1.5113	-2.10616	2.0611	-1.02186	0.306848	NA
ENSMUSG00000013539	Tango2	1316.49	-0.0194958	0.145701	-0.133807	0.893555	0.999943
ENSMUSG00000013584	Aldh1a2	0.557327	1.21058	3.07657	0.393482	0.693964	NA
ENSMUSG00000013593	Ndufs2	3133.05	0.053191	0.117305	0.453443	0.65023	0.999943
ENSMUSG00000013611	Snx31	15.9052	2.56817	0.91454	2.80815	0.00498273	0.586429
ENSMUSG00000013622	Atraid	1250.2	0.0633647	0.110341	0.574261	0.565791	0.999943
ENSMUSG00000013629	Cad	1173.3	0.227802	0.183067	1.24436	0.213366	0.999943
ENSMUSG00000013646	Sh3bp5l	1386.75	0.075638	0.140626	0.537867	0.590669	0.999943
ENSMUSG00000013662	Atad1	4778.6	0.0532584	0.0944454	0.563906	0.572818	0.999943
ENSMUSG00000013663	Pten	7689.6	0.0115721	0.129519	0.089347	0.928806	0.999943
ENSMUSG00000013698	Pea15a	14938.8	0.0951871	0.0975447	0.97583	0.329149	0.999943
ENSMUSG00000013701	Timm23	943.822	0.00746258	0.145357	0.0513398	0.959055	0.999943
ENSMUSG00000013707	Tnfaip8l2	2.72019	0.184226	1.29637	0.14211	0.886993	NA
ENSMUSG00000013736	Trnt1	1002.11	-0.155157	0.127767	-1.21437	0.224606	0.999943
ENSMUSG00000013766	Ly6g6e	6.20117	0.783491	0.864398	0.906401	0.364724	0.999943
ENSMUSG00000013787	Ehmt2	4254.28	-0.0644648	0.124744	-0.516778	0.605311	0.999943
ENSMUSG00000013822	Elof1	648.991	0.0450997	0.144482	0.312149	0.754928	0.999943
ENSMUSG00000013833	Med16	1237.05	0.0265914	0.122747	0.216636	0.828492	0.999943
ENSMUSG00000013846	St3gal1	2828.58	-0.154859	0.111748	-1.38579	0.165812	0.999943
ENSMUSG00000013858	Tmem259	1980.09	0.0297054	0.116873	0.254167	0.799366	0.999943
ENSMUSG00000013878	Rnf170	776.777	-0.0828493	0.120669	-0.686582	0.492346	0.999943
ENSMUSG00000013921	Clip3	11863.2	0.0519174	0.0990785	0.524003	0.600277	0.999943
ENSMUSG00000013928	1700020L13Rik	3.05174	-0.160899	1.14722	-0.140252	0.888461	NA
ENSMUSG00000013936	Myl2	0.485015	1.0097	3.17846	0.317669	0.750736	NA
ENSMUSG00000013973	Dedd	662.537	-0.0227651	0.204217	-0.111475	0.911239	0.999943
ENSMUSG00000013974	Mcemp1	3.7006	0.263179	1.25403	0.209866	0.833772	0.999943
ENSMUSG00000013997	Nit1	670.182	-0.0559517	0.132399	-0.422598	0.672589	0.999943
ENSMUSG00000014030	Pax5	7.90665	-0.309987	0.791806	-0.391493	0.695433	0.999943
ENSMUSG00000014039	Prdm15	379.598	-0.553595	0.22562	-2.45366	0.014141	0.946678
ENSMUSG00000014074	Rnf168	1108.15	-0.0800705	0.102859	-0.778449	0.436305	0.999943
ENSMUSG00000014075	Dynlt2b	221.417	0.00382855	0.159775	0.0239621	0.980883	0.999943
ENSMUSG00000014077	Chp1	2486.62	0.0137423	0.0872927	0.157427	0.874908	0.999943
ENSMUSG00000014158	Trpv4	2.09416	0.311176	1.35462	0.229715	0.818313	NA
ENSMUSG00000014164	Klhl3	1200.68	-0.412602	0.123024	-3.35384	0.000796985	0.226563
ENSMUSG00000014177	Tvp23b	753.762	0.0974373	0.272263	0.357879	0.720434	0.999943
ENSMUSG00000014195	Dnajc7	3939.19	0.0460571	0.105891	0.43495	0.663599	0.999943
ENSMUSG00000014198	Zfp385c	2.18337	-0.405581	1.35656	-0.298977	0.764957	NA
ENSMUSG00000014226	Cacybp	2832.91	0.0297985	0.101612	0.293258	0.769325	0.999943
ENSMUSG00000014232	Cluap1	685.585	-0.0527388	0.133427	-0.395262	0.692649	0.999943
ENSMUSG00000014243	Zswim7	130.576	-0.0812427	0.195574	-0.415406	0.677844	0.999943
ENSMUSG00000014245	Pigl	155.685	0.280805	0.225093	1.24751	0.212212	0.999943
ENSMUSG00000014294	Ndufa2	1115.77	-0.0127299	0.154035	-0.0826429	0.934135	0.999943
ENSMUSG00000014301	Pam16	153.828	0.202016	0.319338	0.632607	0.52699	0.999943
ENSMUSG00000014303	Glis2	396.589	0.122778	0.211929	0.579335	0.562363	0.999943
ENSMUSG00000014313	Cox6c	2108.76	0.00678137	0.130616	0.0519184	0.958594	0.999943
ENSMUSG00000014329	Bicc1	66.9077	0.0444975	0.282034	0.157774	0.874635	0.999943
ENSMUSG00000014349	Ube2z	3663.84	0.0392007	0.10996	0.3565	0.721466	0.999943
ENSMUSG00000014353	Tmem87b	1209.09	-0.0326059	0.102158	-0.319171	0.749597	0.999943
ENSMUSG00000014355	Anapc1	3595.68	-0.0929036	0.134596	-0.690239	0.490044	0.999943
ENSMUSG00000014361	Mertk	142.504	-0.0421379	0.254816	-0.165366	0.868656	0.999943
ENSMUSG00000014402	Tsg101	1744.42	0.132382	0.12694	1.04287	0.297009	0.999943
ENSMUSG00000014418	Hps5	279.453	-0.093758	0.246982	-0.379615	0.704231	0.999943
ENSMUSG00000014426	Map3k4	958.598	-0.33295	0.178688	-1.86331	0.0624193	0.999943
ENSMUSG00000014444	Piezo1	910.384	-0.319881	0.216828	-1.47528	0.140138	0.999943
ENSMUSG00000014470	Rnf166	319.689	0.148702	0.143894	1.03342	0.301409	0.999943
ENSMUSG00000014496	Ankrd28	1411.66	-0.0763927	0.252058	-0.303076	0.761832	0.999943
ENSMUSG00000014498	Ankrd52	2698.31	-0.198856	0.105015	-1.89361	0.058277	0.999943
ENSMUSG00000014503	Pkd2l2	75.2843	-0.156216	0.260328	-0.600075	0.548456	0.999943
ENSMUSG00000014504	Srp19	868.926	0.0687838	0.144406	0.476323	0.633844	0.999943
ENSMUSG00000014547	Wdfy2	645.415	-0.013273	0.11099	-0.119587	0.90481	0.999943
ENSMUSG00000014550	Rbsn	1599.33	0.145839	0.174311	0.836659	0.402784	0.999943
ENSMUSG00000014551	Mrps25	1147.55	0.0184192	0.195542	0.0941957	0.924954	0.999943
ENSMUSG00000014554	Dguok	333.629	0.270207	0.180459	1.49733	0.134307	0.999943
ENSMUSG00000014592	Camta1	5080.16	-0.142052	0.125092	-1.13558	0.256134	0.999943
ENSMUSG00000014599	Csf1	214.953	0.519998	0.241664	2.15174	0.0314177	0.999943
ENSMUSG00000014601	Strip1	4334.4	-0.0739358	0.139094	-0.531551	0.595037	0.999943
ENSMUSG00000014602	Kif1a	38907.8	-0.0320332	0.190649	-0.168022	0.866566	0.999943
ENSMUSG00000014606	Slc25a11	2201.26	0.171918	0.147338	1.16683	0.243281	0.999943
ENSMUSG00000014609	Chrne	1.50147	-0.718488	1.72078	-0.417537	0.676286	NA
ENSMUSG00000014633	Cmc2	109.739	0.0432135	0.235391	0.183582	0.854342	0.999943
ENSMUSG00000014668	Chfr	2111.1	-0.437199	0.109033	-4.00979	6.07738e-05	0.0481133
ENSMUSG00000014686	Ceacam16	49.0741	0.238557	0.311188	0.766599	0.44332	0.999943
ENSMUSG00000014725	Adam28	2.87417	-0.46218	1.18057	-0.391489	0.695436	NA
ENSMUSG00000014747	Ankrd53	5.91106	-0.26566	0.904746	-0.293629	0.769041	0.999943
ENSMUSG00000014748	Tex261	1413.11	-0.0496973	0.107764	-0.461166	0.64468	0.999943
ENSMUSG00000014763	Fam120b	1470.63	-0.0195	0.0933531	-0.208884	0.834539	0.999943
ENSMUSG00000014767	Tbp	486.027	0.0805392	0.159349	0.505427	0.613259	0.999943
ENSMUSG00000014769	Psmb1	2766.52	0.0353334	0.126195	0.279991	0.779484	0.999943
ENSMUSG00000014771	Pdcd2	259.536	0.0644695	0.170556	0.377996	0.705433	0.999943
ENSMUSG00000014773	Dll1	281.876	0.261782	0.180594	1.44956	0.147182	0.999943
ENSMUSG00000014776	Nol3	195.621	0.00544318	0.198723	0.0273908	0.978148	0.999943
ENSMUSG00000014778	Fhod1	28.7544	0.0981231	0.554972	0.176807	0.85966	0.999943
ENSMUSG00000014782	Plekhg4	42.6404	-0.232285	0.528337	-0.439653	0.660189	0.999943
ENSMUSG00000014786	Slc9a5	664.245	0.0478081	0.165486	0.288895	0.772661	0.999943
ENSMUSG00000014791	Elmo3	10.9793	-0.861534	0.697365	-1.23541	0.216677	0.999943
ENSMUSG00000014813	Stc1	329.052	-0.0406497	0.165902	-0.245022	0.80644	0.999943
ENSMUSG00000014837	4931428F04Rik	3967.65	-0.122668	0.0973369	-1.26024	0.207581	0.999943
ENSMUSG00000014846	Tppp3	952.938	0.207921	0.144513	1.43877	0.150215	0.999943
ENSMUSG00000014850	Msh3	628.051	-0.025592	0.203178	-0.125958	0.899765	0.999943
ENSMUSG00000014852	Adamts13	12.4685	-0.181111	0.632113	-0.286516	0.774483	0.999943
ENSMUSG00000014856	Tmem208	639.274	-0.00854382	0.172345	-0.049574	0.960462	0.999943
ENSMUSG00000014859	E2f4	622.902	-0.0822286	0.138944	-0.591811	0.553977	0.999943
ENSMUSG00000014867	Surf4	3666.93	-0.0128022	0.127595	-0.100334	0.920079	0.999943
ENSMUSG00000014873	Surf2	466.224	-0.0597164	0.132836	-0.449548	0.653036	0.999943
ENSMUSG00000014905	Dnajb9	833.339	-0.252527	0.156603	-1.61253	0.106846	0.999943
ENSMUSG00000014907	Naf1	500.458	-0.148918	0.133945	-1.11178	0.266231	0.999943
ENSMUSG00000014932	Yes1	528.225	-0.123618	0.204948	-0.603169	0.546396	0.999943
ENSMUSG00000014956	Ppp1cb	8310.82	-0.0250888	0.106142	-0.23637	0.813146	0.999943
ENSMUSG00000014959	Gorasp2	3018.8	-0.0855076	0.114226	-0.74858	0.45411	0.999943
ENSMUSG00000014980	Tsen15	293.084	0.339157	0.321135	1.05612	0.290914	0.999943
ENSMUSG00000015002	Efr3a	1640.59	-0.00260766	0.14443	-0.0180548	0.985595	0.999943
ENSMUSG00000015013	Trappc2l	688.07	-0.101395	0.170194	-0.595765	0.551333	0.999943
ENSMUSG00000015016	Acsf3	343.035	0.00506392	0.150152	0.0337253	0.973096	0.999943
ENSMUSG00000015023	Ddx19a	638.934	0.257024	0.130385	1.97126	0.0486942	0.999943
ENSMUSG00000015027	Galns	293.575	0.288181	0.201834	1.42781	0.153345	0.999943
ENSMUSG00000015083	C8g	26.0051	-0.119835	0.425149	-0.281867	0.778046	0.999943
ENSMUSG00000015085	Entpd2	58.2346	0.499697	0.37281	1.34036	0.18013	0.999943
ENSMUSG00000015087	Rabl6	1967.11	0.0569007	0.118011	0.482164	0.629689	0.999943
ENSMUSG00000015090	Ptgds	53.4963	0.360573	0.305706	1.17948	0.238208	0.999943
ENSMUSG00000015092	Edf1	1703.21	0.0228545	0.113291	0.201732	0.840126	0.999943
ENSMUSG00000015093	Clic3	9.97304	-0.553791	0.724541	-0.764334	0.444668	0.999943
ENSMUSG00000015094	Npdc1	5766.11	-0.0226665	0.11477	-0.197494	0.843441	0.999943
ENSMUSG00000015095	Fbxw5	2295.79	-0.0312039	0.100291	-0.311133	0.7557	0.999943
ENSMUSG00000015112	Slc25a13	25.6032	0.595061	0.69294	0.858747	0.39048	0.999943
ENSMUSG00000015120	Ube2i	2051.24	0.0298234	0.100602	0.29645	0.766886	0.999943
ENSMUSG00000015126	Tsr3	599.865	-0.0150867	0.127087	-0.118712	0.905503	0.999943
ENSMUSG00000015127	Unkl	1069.64	0.141608	0.126488	1.11954	0.26291	0.999943
ENSMUSG00000015133	Lrrk1	18.023	0.515659	0.628455	0.820518	0.411921	0.999943
ENSMUSG00000015134	Aldh1a3	518.88	0.14407	0.159956	0.900686	0.367755	0.999943
ENSMUSG00000015143	Actn1	1422.55	-0.320934	0.102384	-3.13461	0.00172085	0.334203
ENSMUSG00000015149	Sirt2	1795.94	0.0592148	0.125325	0.472489	0.636578	0.999943
ENSMUSG00000015165	Hnrnpl	4215.2	0.043645	0.0914528	0.477241	0.633191	0.999943
ENSMUSG00000015176	Nolc1	1567.91	-0.0156113	0.118118	-0.132167	0.894852	0.999943
ENSMUSG00000015189	Casd1	1652.68	0.0714121	0.129082	0.553233	0.580104	0.999943
ENSMUSG00000015202	Cnksr3	36.4775	-0.269644	0.375045	-0.718964	0.472163	0.999943
ENSMUSG00000015214	Mtmr1	739.641	-0.156677	0.115836	-1.35257	0.176193	0.999943
ENSMUSG00000015217	Hmgb3	2798.71	0.0286379	0.0843947	0.339333	0.734359	0.999943
ENSMUSG00000015222	Map2	34270.4	-0.0907454	0.229662	-0.395126	0.69275	0.999943
ENSMUSG00000015224	Cyp2j9	158.404	0.12365	0.189806	0.651454	0.514754	0.999943
ENSMUSG00000015243	Abca1	2112.82	-0.0492996	0.138671	-0.355514	0.722205	0.999943
ENSMUSG00000015247	Nipsnap3b	851.579	0.067659	0.129246	0.52349	0.600633	0.999943
ENSMUSG00000015289	Lage3	339.995	0.14479	0.161915	0.894238	0.371195	0.999943
ENSMUSG00000015290	Ubl4a	1709.53	0.0279647	0.105811	0.26429	0.791556	0.999943
ENSMUSG00000015291	Gdi1	14134.8	-0.0351015	0.0946327	-0.370923	0.710695	0.999943
ENSMUSG00000015305	Sash1	1109.15	0.0207312	0.136658	0.151702	0.879422	0.999943
ENSMUSG00000015312	Gadd45b	124.043	-0.125913	0.277591	-0.453592	0.650123	0.999943
ENSMUSG00000015314	Slamf6	2.70618	0.416581	1.24496	0.334614	0.737917	NA
ENSMUSG00000015316	Slamf1	6.18366	0.50478	0.857224	0.588854	0.555959	0.999943
ENSMUSG00000015335	Zdhhc12	272.691	0.112511	0.14563	0.772582	0.43977	0.999943
ENSMUSG00000015337	Endog	192.903	0.106756	0.188367	0.566745	0.570887	0.999943
ENSMUSG00000015340	Cybb	0.617944	-1.26235	2.56349	-0.492436	0.622411	NA
ENSMUSG00000015341	Golga7	1975.7	0.00190289	0.0979421	0.0194287	0.984499	0.999943
ENSMUSG00000015342	Xk	578.614	-0.112888	0.153646	-0.734731	0.462504	0.999943
ENSMUSG00000015354	Pcolce2	29.528	0.127151	0.629921	0.201852	0.840033	0.999943
ENSMUSG00000015357	Clpx	638.638	0.16488	0.145886	1.1302	0.258393	0.999943
ENSMUSG00000015363	Trabd	591.189	0.0577584	0.138479	0.417091	0.676612	0.999943
ENSMUSG00000015365	Mov10l1	2.2401	0.172996	1.81229	0.0954569	0.923952	NA
ENSMUSG00000015377	Dennd6b	932.73	-0.0434038	0.118732	-0.365561	0.714693	0.999943
ENSMUSG00000015396	Cd83	168.047	0.246834	0.181112	1.36288	0.17292	0.999943
ENSMUSG00000015451	C4a	22.7783	-1.41825	0.7502	-1.8905	0.0586915	0.999943
ENSMUSG00000015452	Ager	5.38048	0.191908	0.920747	0.208426	0.834896	0.999943
ENSMUSG00000015461	Atf6b	2608.86	-0.0317557	0.138161	-0.229846	0.818212	0.999943
ENSMUSG00000015467	Egfl8	1.27943	0.418226	2.09016	0.200093	0.841408	NA
ENSMUSG00000015468	Notch4	42.7128	0.305993	0.920924	0.332267	0.739687	0.999943
ENSMUSG00000015474	Ppt2	541.219	0.159175	0.163225	0.975187	0.329468	0.999943
ENSMUSG00000015476	Prrt1	1174.56	0.131737	0.130457	1.00981	0.312585	0.999943
ENSMUSG00000015478	Rnf5	1388.75	-0.0460918	0.12052	-0.382442	0.702134	0.999943
ENSMUSG00000015484	Fam163a	119.493	-0.215194	0.240669	-0.89415	0.371242	0.999943
ENSMUSG00000015488	Cacfd1	1780.76	0.0703394	0.154431	0.455474	0.648768	0.999943
ENSMUSG00000015501	Hivep2	6058.16	-0.244379	0.180202	-1.35614	0.175055	0.999943
ENSMUSG00000015522	Arnt	413.116	0.0225092	0.375106	0.0600077	0.952149	0.999943
ENSMUSG00000015533	Itga2	9.93287	0.242798	0.706615	0.343607	0.731142	0.999943
ENSMUSG00000015536	Mocs2	1085.38	-0.0737372	0.14688	-0.502022	0.615652	0.999943
ENSMUSG00000015542	Nat9	325.064	-0.0637004	0.209541	-0.303999	0.761128	0.999943
ENSMUSG00000015568	Lpl	1140.86	0.133901	0.123438	1.08477	0.278024	0.999943
ENSMUSG00000015575	Atp6v0e	276.831	5.12802e-05	0.174384	0.000294064	0.999765	0.999943
ENSMUSG00000015579	Nkx2-5	0.775958	-1.68373	2.39472	-0.703099	0.481994	NA
ENSMUSG00000015597	Zfp318	2139.94	0.0508264	0.173399	0.293117	0.769432	0.999943
ENSMUSG00000015599	Ttbk1	4094.67	-0.0245914	0.0991435	-0.248039	0.804105	0.999943
ENSMUSG00000015605	Srf	837.999	-0.157763	0.151897	-1.03862	0.298984	0.999943
ENSMUSG00000015619	Gata3	1.34863	0.198762	1.66344	0.119489	0.904888	NA
ENSMUSG00000015647	Lama5	291.238	0.306889	0.237145	1.2941	0.195632	0.999943
ENSMUSG00000015652	Steap1	12.1668	0.753881	0.639341	1.17915	0.238337	0.999943
ENSMUSG00000015653	Steap2	258.002	0.00177162	0.228326	0.00775917	0.993809	0.999943
ENSMUSG00000015656	Hspa8	59529.1	0.0365893	0.0785797	0.465634	0.641478	0.999943
ENSMUSG00000015659	Serac1	480.404	-0.0674689	0.177656	-0.379772	0.704114	0.999943
ENSMUSG00000015668	Pdzd11	630.121	0.25443	0.120497	2.1115	0.0347298	0.999943
ENSMUSG00000015671	Psma2	2161.08	0.00812752	0.10558	0.0769796	0.93864	0.999943
ENSMUSG00000015672	Mrpl32	561.014	0.0281341	0.129172	0.217803	0.827582	0.999943
ENSMUSG00000015697	Setdb1	1511.47	0.0802608	0.116529	0.688759	0.490975	0.999943
ENSMUSG00000015702	Anxa9	9.48576	1.0816	0.861315	1.25576	0.209203	0.999943
ENSMUSG00000015709	Arnt2	7229.42	0.163578	0.173098	0.945001	0.344658	0.999943
ENSMUSG00000015711	Prune1	1665.61	0.114648	0.102408	1.11952	0.262918	0.999943
ENSMUSG00000015714	Cers2	757.086	0.109543	0.142853	0.766824	0.443186	0.999943
ENSMUSG00000015721	Nlrp5	2.03608	0.287583	1.41709	0.202939	0.839182	NA
ENSMUSG00000015733	Capza2	5675.32	-0.102966	0.109465	-0.940631	0.346894	0.999943
ENSMUSG00000015745	Plekho1	404.72	0.0929504	0.148376	0.626452	0.531019	0.999943
ENSMUSG00000015747	Vps45	921.562	-0.0246634	0.117265	-0.210322	0.833416	0.999943
ENSMUSG00000015748	Prpf3	344.332	0.302747	0.245691	1.23223	0.217864	0.999943
ENSMUSG00000015749	Anp32e	3531.85	-0.104006	0.161999	-0.642016	0.520863	0.999943
ENSMUSG00000015750	Aph1a	1285.11	-0.0173011	0.145187	-0.119164	0.905145	0.999943
ENSMUSG00000015755	Tab2	1860.4	0.0610105	0.141217	0.432034	0.665717	0.999943
ENSMUSG00000015757	Ppil4	1127.23	-0.0667616	0.101957	-0.654798	0.512598	0.999943
ENSMUSG00000015759	Cnih1	1666.44	-0.0191251	0.122733	-0.155827	0.876169	0.999943
ENSMUSG00000015766	Eps8	903.797	-0.128933	0.205925	-0.626116	0.531239	0.999943
ENSMUSG00000015776	Med22	1026.18	0.0545563	0.119801	0.455393	0.648827	0.999943
ENSMUSG00000015790	Surf1	946.453	0.178371	0.136364	1.30805	0.190856	0.999943
ENSMUSG00000015804	Med28	1315.82	-0.0920449	0.134689	-0.683387	0.494363	0.999943
ENSMUSG00000015806	Qdpr	2202.38	0.206522	0.0994705	2.07621	0.0378743	0.999943
ENSMUSG00000015812	Gnrh1	1.74062	1.05171	1.52342	0.690361	0.489967	NA
ENSMUSG00000015829	Tnr	2803.96	-0.315972	0.213418	-1.48054	0.13873	0.999943
ENSMUSG00000015837	Sqstm1	9813.1	0.121535	0.104433	1.16376	0.244522	0.999943
ENSMUSG00000015839	Nfe2l2	458.513	0.265913	0.126487	2.10229	0.035528	0.999943
ENSMUSG00000015843	Rxrg	73.0895	0.185158	0.273496	0.677006	0.498402	0.999943
ENSMUSG00000015846	Rxra	347.608	-0.0235597	0.210709	-0.111812	0.910973	0.999943
ENSMUSG00000015850	Adamtsl4	17.8639	0.42943	0.807676	0.531686	0.594943	0.999943
ENSMUSG00000015869	Prpsap1	961.977	-0.0651419	0.134949	-0.482716	0.629297	0.999943
ENSMUSG00000015879	Fam184b	1281.8	0.0613789	0.0944991	0.649518	0.516003	0.999943
ENSMUSG00000015880	Ncapg	123.612	-0.18702	0.322365	-0.580149	0.561814	0.999943
ENSMUSG00000015882	Lcorl	2922.05	-0.101185	0.285205	-0.354779	0.722755	0.999943
ENSMUSG00000015889	Lta4h	1164.43	-0.0147987	0.102322	-0.14463	0.885003	0.999943
ENSMUSG00000015890	Amdhd1	58.6741	-0.0339337	0.293696	-0.11554	0.908017	0.999943
ENSMUSG00000015932	Dstn	9567.83	0.00650368	0.0933008	0.0697065	0.944427	0.999943
ENSMUSG00000015937	Macroh2a1	1675.19	-0.0866205	0.130583	-0.663334	0.507116	0.999943
ENSMUSG00000015942	Gtf2ird2	311.286	-0.450826	0.203376	-2.21671	0.0266431	0.999943
ENSMUSG00000015943	Bola1	195.328	0.0535967	0.203054	0.263952	0.791817	0.999943
ENSMUSG00000015944	Castor2	2914.21	-0.0287085	0.120753	-0.237745	0.812079	0.999943
ENSMUSG00000015950	Ncf1	5.72059	1.86328	1.09077	1.70822	0.0875946	0.999943
ENSMUSG00000015957	Wnt11	8.85051	0.552697	0.902185	0.61262	0.540128	0.999943
ENSMUSG00000015961	Adss	1396.94	-0.0015297	0.103128	-0.014833	0.988165	0.999943
ENSMUSG00000015966	Il17rb	2.61368	-0.888551	1.3737	-0.646832	0.51774	NA
ENSMUSG00000015968	Cacna1d	1118.49	-0.404021	0.148294	-2.72446	0.00644074	0.682893
ENSMUSG00000015970	Chdh	4.22987	0.288987	1.05161	0.274804	0.783467	0.999943
ENSMUSG00000015971	Actr8	678.777	-0.244709	0.164894	-1.48404	0.137798	0.999943
ENSMUSG00000015980	Lrrc27	179.423	0.0248874	0.222565	0.111821	0.910965	0.999943
ENSMUSG00000015981	Stk32c	1869.17	-0.0543847	0.124307	-0.437503	0.661747	0.999943
ENSMUSG00000015994	Fnta	1004.19	0.10693	0.124466	0.859108	0.390281	0.999943
ENSMUSG00000016018	Mtrex	1398.72	0.0588567	0.130244	0.451896	0.651344	0.999943
ENSMUSG00000016024	Lbp	2.10448	-1.77358	1.75702	-1.00943	0.312769	NA
ENSMUSG00000016028	Celsr1	529.84	0.509477	0.28136	1.81077	0.0701765	0.999943
ENSMUSG00000016087	Fli1	1.40969	1.8578	1.85134	1.00349	0.315624	NA
ENSMUSG00000016128	Stard13	59.4293	1.04873	0.679277	1.54389	0.122616	0.999943
ENSMUSG00000016150	Tenm1	5617.23	-0.086885	0.295775	-0.293753	0.768947	0.999943
ENSMUSG00000016179	Camk1g	1530.87	0.0219961	0.103474	0.212577	0.831657	0.999943
ENSMUSG00000016181	Utp25	461.118	-0.17666	0.249606	-0.707754	0.479098	0.999943
ENSMUSG00000016194	Hsd11b1	59.6828	0.192434	0.309899	0.620958	0.534628	0.999943
ENSMUSG00000016200	Syt14	650.024	-0.201622	0.207368	-0.972294	0.330904	0.999943
ENSMUSG00000016206	H2-M3	33.6313	0.108381	0.368835	0.293846	0.768876	0.999943
ENSMUSG00000016239	Lonrf3	143.809	0.021971	0.353141	0.0622159	0.950391	0.999943
ENSMUSG00000016252	Atp5e	1596.31	0.0605958	0.158173	0.383098	0.701647	0.999943
ENSMUSG00000016253	Nelfcd	1066.1	0.077939	0.171004	0.455773	0.648553	0.999943
ENSMUSG00000016256	Ctsz	116.772	0.157201	0.25537	0.61558	0.538171	0.999943
ENSMUSG00000016257	Prelid3b	918.081	-0.103571	0.128834	-0.803913	0.421447	0.999943
ENSMUSG00000016262	Sertad4	581.089	-0.188849	0.24493	-0.771033	0.440687	0.999943
ENSMUSG00000016308	Ube2a	993.607	-0.326468	0.17698	-1.84466	0.0650871	0.999943
ENSMUSG00000016319	Slc25a5	3869.26	0.0034373	0.130113	0.0264179	0.978924	0.999943
ENSMUSG00000016344	Ppdpf	1731.1	0.228742	0.134648	1.69882	0.0893528	0.999943
ENSMUSG00000016346	Kcnq2	9313.98	0.119911	0.144159	0.831799	0.405523	0.999943
ENSMUSG00000016349	Eef1a2	6567.22	0.0246839	0.0999694	0.246914	0.804974	0.999943
ENSMUSG00000016356	Col20a1	43.7082	-0.617371	0.43206	-1.4289	0.153033	0.999943
ENSMUSG00000016382	Pls3	2838.74	0.0280904	0.0863669	0.325245	0.744995	0.999943
ENSMUSG00000016386	Mpped2	2311.28	-0.186319	0.109299	-1.70468	0.0882547	0.999943
ENSMUSG00000016409	Nkap	745.15	0.00235953	0.298605	0.00790186	0.993695	0.999943
ENSMUSG00000016427	Ndufa1	652.644	-0.0687827	0.21263	-0.323486	0.746327	0.999943
ENSMUSG00000016458	Wt1	10.2082	-0.139244	0.770658	-0.180682	0.856617	0.999943
ENSMUSG00000016477	E2f3	751.166	-0.178719	0.143508	-1.24537	0.212997	0.999943
ENSMUSG00000016481	Cr1l	354.177	-0.045608	0.165504	-0.27557	0.782878	0.999943
ENSMUSG00000016487	Ppfibp1	927.691	-0.15096	0.163591	-0.92279	0.356117	0.999943
ENSMUSG00000016493	Cd46	69.7756	-0.21621	0.311232	-0.694692	0.487248	0.999943
ENSMUSG00000016494	Cd34	74.8696	-0.322674	0.315094	-1.02405	0.305809	0.999943
ENSMUSG00000016495	Plgrkt	278.62	0.323225	0.205051	1.57632	0.114953	0.999943
ENSMUSG00000016496	Cd274	33.3949	0.492146	0.363638	1.35339	0.17593	0.999943
ENSMUSG00000016498	Pdcd1lg2	0.778513	-1.65171	2.38724	-0.691893	0.489005	NA
ENSMUSG00000016503	Gtf3a	1008.63	-0.0242482	0.127663	-0.189939	0.849357	0.999943
ENSMUSG00000016510	Mtif3	342.625	-0.147058	0.186203	-0.789773	0.429661	0.999943
ENSMUSG00000016520	Lnx2	262.119	-0.1669	0.165871	-1.00621	0.314317	0.999943
ENSMUSG00000016526	Dyrk3	258.107	0.0191682	0.204045	0.0939409	0.925156	0.999943
ENSMUSG00000016528	Mapkapk2	698.954	0.0762273	0.127645	0.597181	0.550387	0.999943
ENSMUSG00000016534	Lamp2	2189.61	0.189846	0.107257	1.77002	0.0767239	0.999943
ENSMUSG00000016541	Atxn10	8357.49	-0.00553993	0.0893882	-0.0619761	0.950582	0.999943
ENSMUSG00000016552	Foxred2	823.275	0.000448865	0.126437	0.00355011	0.997167	0.999943
ENSMUSG00000016554	Eif3d	2575.52	0.0231343	0.106115	0.218012	0.82742	0.999943
ENSMUSG00000016559	H3f3b	7339.23	0.0114586	0.0937604	0.122211	0.902732	0.999943
ENSMUSG00000016619	Nup50	1157.5	0.0129315	0.107694	0.120076	0.904423	0.999943
ENSMUSG00000016624	Phf21b	47.6119	-1.82677	0.687359	-2.65766	0.00786862	0.728033
ENSMUSG00000016637	Ift27	420.767	-0.0128794	0.193462	-0.066573	0.946922	0.999943
ENSMUSG00000016664	Pacsin2	696.691	-0.157781	0.146962	-1.07362	0.282995	0.999943
ENSMUSG00000016756	Cmah	51.5637	0.0511128	0.347698	0.147004	0.883129	0.999943
ENSMUSG00000016757	Ttll12	1919.92	0.0397663	0.0949875	0.418648	0.675474	0.999943
ENSMUSG00000016763	Scube1	1231.32	0.108528	0.121597	0.892526	0.372111	0.999943
ENSMUSG00000016831	Tox4	2140.19	-0.0820089	0.11489	-0.713803	0.475349	0.999943
ENSMUSG00000016833	Mrps18c	302.341	0.210094	0.19264	1.0906	0.275447	0.999943
ENSMUSG00000016918	Sulf1	47.5669	0.0131288	0.409183	0.0320855	0.974404	0.999943
ENSMUSG00000016921	Srsf6	1882.37	-0.0765647	0.0908122	-0.84311	0.399167	0.999943
ENSMUSG00000016933	Plcg1	2474.19	-0.173936	0.135722	-1.28156	0.199997	0.999943
ENSMUSG00000016940	Kctd2	968.757	0.0807563	0.114976	0.702377	0.482444	0.999943
ENSMUSG00000016942	Tmprss6	2.412	2.83406	2.14595	1.32066	0.186616	NA
ENSMUSG00000016946	Kctd5	1480.47	0.0637035	0.101496	0.627648	0.530235	0.999943
ENSMUSG00000016982	Pom121l2	2.75013	-0.634153	1.30742	-0.485041	0.627647	NA
ENSMUSG00000016984	Etaa1	245.659	-0.00216625	0.17674	-0.0122567	0.990221	0.999943
ENSMUSG00000016995	Matn4	21.1975	-0.376767	0.459125	-0.820619	0.411863	0.999943
ENSMUSG00000017002	Slpi	1.39237	-1.16706	1.88144	-0.620303	0.535058	NA
ENSMUSG00000017007	Rbpjl	1.14566	1.35933	2.01847	0.673442	0.500666	NA
ENSMUSG00000017009	Sdc4	486.052	0.197841	0.142972	1.38378	0.166426	0.999943
ENSMUSG00000017057	Il13ra1	38.9065	-0.438898	0.391045	-1.12237	0.261704	0.999943
ENSMUSG00000017119	Nbr1	3377.42	-0.0194671	0.0930309	-0.209255	0.83425	0.999943
ENSMUSG00000017132	Cyth1	1125.97	-0.00239877	0.164434	-0.0145881	0.988361	0.999943
ENSMUSG00000017144	Rnd3	527.796	0.0666117	0.119559	0.557147	0.577427	0.999943
ENSMUSG00000017146	Brca1	41.7073	0.746855	0.57361	1.30203	0.192908	0.999943
ENSMUSG00000017165	Gast	2.21276	-1.63468	1.42995	-1.14317	0.252967	NA
ENSMUSG00000017167	Cntnap1	651.834	0.00716631	0.128282	0.0558636	0.95545	0.999943
ENSMUSG00000017176	Nt5c3b	983.872	-0.000921256	0.131554	-0.00700286	0.994413	0.999943
ENSMUSG00000017188	Coa3	1202.75	0.0450767	0.160834	0.280268	0.779272	0.999943
ENSMUSG00000017195	Zpbp2	1.10385	-0.204908	2.18151	-0.0939296	0.925165	NA
ENSMUSG00000017210	Med24	1664.65	0.0405876	0.110131	0.368539	0.712472	0.999943
ENSMUSG00000017221	Psmd3	3531.38	0.0154412	0.0971403	0.158958	0.873702	0.999943
ENSMUSG00000017264	Exosc10	1496.85	-0.0968493	0.0984544	-0.983697	0.325265	0.999943
ENSMUSG00000017286	Glod4	1265.04	-0.0732294	0.182724	-0.400765	0.688593	0.999943
ENSMUSG00000017288	Vps53	1675.24	-0.0660508	0.135465	-0.487584	0.625844	0.999943
ENSMUSG00000017291	Taok1	4206.45	-0.2104	0.197368	-1.06603	0.28641	0.999943
ENSMUSG00000017299	Dnttip1	411.013	-0.0067869	0.18454	-0.0367775	0.970662	0.999943
ENSMUSG00000017307	Acot8	278.856	-0.0404604	0.171167	-0.23638	0.813138	0.999943
ENSMUSG00000017309	Cd300lg	2.07595	2.45751	1.75792	1.39796	0.162124	NA
ENSMUSG00000017310	Spint4	1.33636	0.28345	2.04344	0.138713	0.889677	NA
ENSMUSG00000017314	Mpp2	2830.95	-0.0620154	0.135136	-0.458912	0.646298	0.999943
ENSMUSG00000017344	Vtn	2.87229	-0.732343	1.45801	-0.50229	0.615464	NA
ENSMUSG00000017376	Nlk	1883.67	0.222584	0.132669	1.67774	0.0933984	0.999943
ENSMUSG00000017386	Traf4	1220.53	-0.0430967	0.114302	-0.377043	0.706141	0.999943
ENSMUSG00000017390	Aldoc	6775.29	0.0734022	0.0972572	0.754723	0.450415	0.999943
ENSMUSG00000017400	Stac2	561.391	0.0810457	0.206087	0.39326	0.694127	0.999943
ENSMUSG00000017404	Rpl19	5552.26	0.017862	0.127284	0.140332	0.888398	0.999943
ENSMUSG00000017405	Nek8	133.684	0.0916446	0.242426	0.378031	0.705408	0.999943
ENSMUSG00000017412	Cacnb4	2450.4	-0.578703	0.307243	-1.88353	0.0596281	0.999943
ENSMUSG00000017417	Plxdc1	73.2646	0.063577	0.267291	0.237857	0.811992	0.999943
ENSMUSG00000017418	Arl5b	999.925	-0.142352	0.152846	-0.931345	0.351675	0.999943
ENSMUSG00000017421	Zfp207	2297.48	0.0744409	0.0949206	0.784244	0.432897	0.999943
ENSMUSG00000017428	Psmd11	1928.25	-0.030826	0.112642	-0.273662	0.784344	0.999943
ENSMUSG00000017446	C1qtnf1	98.7189	-0.583576	0.364997	-1.59885	0.109854	0.999943
ENSMUSG00000017453	Pipox	28.861	0.777827	0.419571	1.85386	0.0637589	0.999943
ENSMUSG00000017466	Timp2	12353	-0.0153785	0.076115	-0.202043	0.839883	0.999943
ENSMUSG00000017478	Zc3h18	830.672	-0.164209	0.204692	-0.802225	0.422423	0.999943
ENSMUSG00000017485	Top2b	6810.05	-0.113478	0.129007	-0.879626	0.379062	0.999943
ENSMUSG00000017491	Rarb	107.041	0.00467771	0.225925	0.0207047	0.983481	0.999943
ENSMUSG00000017493	Igfbp4	834.827	0.0734923	0.170532	0.430958	0.666499	0.999943
ENSMUSG00000017499	Cdc6	12.4114	0.422698	0.622159	0.679406	0.496881	0.999943
ENSMUSG00000017548	Suz12	1097.3	-0.212296	0.245484	-0.864807	0.387145	0.999943
ENSMUSG00000017550	Atad5	169.855	-0.217486	0.209285	-1.03918	0.298719	0.999943
ENSMUSG00000017561	Crlf3	151.986	0.109376	0.308913	0.354069	0.723287	0.999943
ENSMUSG00000017607	Tns4	3.91186	1.99052	1.55333	1.28145	0.200035	0.999943
ENSMUSG00000017615	Tnfaip1	1909.56	0.104036	0.110404	0.942317	0.34603	0.999943
ENSMUSG00000017631	Abr	9323.19	-0.0508711	0.0891662	-0.57052	0.568325	0.999943
ENSMUSG00000017639	Rab11fip4	6652.39	0.00148155	0.0820076	0.018066	0.985586	0.999943
ENSMUSG00000017652	Cd40	4.84078	-0.991094	1.15953	-0.854735	0.392698	0.999943
ENSMUSG00000017664	Slc35c2	1223.47	0.0955204	0.116516	0.819802	0.412329	0.999943
ENSMUSG00000017667	Zfp334	785.178	0.0590301	0.125158	0.471644	0.637181	0.999943
ENSMUSG00000017670	Elmo2	2546.26	0.024965	0.0887455	0.28131	0.778473	0.999943
ENSMUSG00000017677	Wsb1	1464.4	-0.159854	0.132546	-1.20602	0.227809	0.999943
ENSMUSG00000017679	Ttpal	1385.62	0.0726972	0.133555	0.544326	0.586217	0.999943
ENSMUSG00000017686	Rhot1	2108.63	0.037961	0.104373	0.363706	0.716077	0.999943
ENSMUSG00000017692	Rhbdl3	481.396	-0.234658	0.167692	-1.39934	0.16171	0.999943
ENSMUSG00000017697	Ada	86.9554	0.00364933	0.257007	0.0141993	0.988671	0.999943
ENSMUSG00000017707	Serinc3	6014.6	-0.0191027	0.0947097	-0.201697	0.840154	0.999943
ENSMUSG00000017713	Tha1	53.7582	0.410603	0.305906	1.34225	0.179514	0.999943
ENSMUSG00000017715	Pgs1	1578.24	0.0613745	0.110042	0.557739	0.577023	0.999943
ENSMUSG00000017716	Birc5	42.8727	-0.0415546	0.348645	-0.119189	0.905126	0.999943
ENSMUSG00000017718	Afmid	88.9053	1.01896	0.362778	2.80878	0.00497299	0.586429
ENSMUSG00000017720	Trp53tg5	0.658369	1.61351	2.8875	0.558792	0.576304	NA
ENSMUSG00000017721	Pigt	3003.3	0.0788563	0.104648	0.753542	0.451124	0.999943
ENSMUSG00000017723	Wfdc2	1.05719	1.50936	2.64799	0.570001	0.568677	NA
ENSMUSG00000017724	Etv4	272.68	0.144244	0.238349	0.60518	0.545059	0.999943
ENSMUSG00000017734	Dbndd2	800.981	-0.0633598	0.194737	-0.325362	0.744907	0.999943
ENSMUSG00000017737	Mmp9	94.5676	-0.133046	0.25438	-0.523023	0.600958	0.999943
ENSMUSG00000017740	Slc12a5	8214.66	-0.0531223	0.108218	-0.490881	0.623511	0.999943
ENSMUSG00000017747	Ghdc	155.237	0.0438284	0.247595	0.177016	0.859496	0.999943
ENSMUSG00000017754	Pltp	220.248	0.162547	0.252792	0.643008	0.520219	0.999943
ENSMUSG00000017756	Slc12a7	300.65	0.618108	0.302484	2.04344	0.0410087	0.999943
ENSMUSG00000017760	Ctsa	1520.12	0.0241419	0.145811	0.165569	0.868496	0.999943
ENSMUSG00000017764	Zswim1	658.529	0.0455194	0.115724	0.393343	0.694066	0.999943
ENSMUSG00000017765	Slc12a4	687.962	0.0749625	0.194064	0.386278	0.699291	0.999943
ENSMUSG00000017774	Myo1c	498.47	0.134475	0.193235	0.695914	0.486483	0.999943
ENSMUSG00000017776	Crk	3840.24	-0.00893987	0.0809877	-0.110385	0.912104	0.999943
ENSMUSG00000017778	Cox7c	1083.55	0.0286883	0.176713	0.162344	0.871035	0.999943
ENSMUSG00000017781	Pitpna	7818.18	0.000891181	0.084233	0.01058	0.991559	0.999943
ENSMUSG00000017801	Mlx	753.777	0.0557608	0.152326	0.366061	0.714319	0.999943
ENSMUSG00000017802	Retreg3	2123.59	0.0274539	0.101573	0.270286	0.78694	0.999943
ENSMUSG00000017817	Jph2	11.2235	-0.451845	0.646779	-0.698608	0.484797	0.999943
ENSMUSG00000017830	Dhx58	9.46603	0.919407	0.77402	1.18783	0.234899	0.999943
ENSMUSG00000017831	Rab5a	3162.03	0.0567753	0.0993075	0.571712	0.567517	0.999943
ENSMUSG00000017832	Hspb9	1.32907	-0.641391	1.81495	-0.353393	0.723794	NA
ENSMUSG00000017837	Nkiras2	1131.3	0.140001	0.12367	1.13205	0.257613	0.999943
ENSMUSG00000017843	Ppp2r5c	4791.43	0.0585828	0.116879	0.501227	0.616211	0.999943
ENSMUSG00000017858	Ift52	459.463	0.0275369	0.268254	0.102652	0.918239	0.999943
ENSMUSG00000017861	Mybl2	27.9212	0.202177	0.493905	0.409344	0.682287	0.999943
ENSMUSG00000017868	Sgk2	0.772675	-0.352072	2.77193	-0.127013	0.89893	NA
ENSMUSG00000017897	Eya2	57.3355	0.00713904	0.425482	0.0167787	0.986613	0.999943
ENSMUSG00000017929	B4galt5	1971.58	0.0858881	0.0990004	0.867553	0.385639	0.999943
ENSMUSG00000017943	Gdap1l1	2307.49	0.0692073	0.133496	0.518421	0.604164	0.999943
ENSMUSG00000017969	Ptgis	15.5367	-0.000116687	0.548169	-0.000212867	0.99983	0.999943
ENSMUSG00000017978	Cadps2	542.36	0.0878116	0.120202	0.730532	0.465065	0.999943
ENSMUSG00000017999	Ddx27	890.468	0.421564	0.157333	2.67944	0.00737448	0.718148
ENSMUSG00000018001	Cyth3	1686.82	0.0184239	0.140378	0.131244	0.895582	0.999943
ENSMUSG00000018008	Cyth4	43.4716	-3.20957	1.68148	-1.90877	0.0562914	0.999943
ENSMUSG00000018012	Rac3	4964.04	0.0497355	0.13197	0.37687	0.70627	0.999943
ENSMUSG00000018040	Rrp7a	1947.8	0.0336205	0.105206	0.319567	0.749296	0.999943
ENSMUSG00000018042	Cyb5r3	3096.3	0.154422	0.107429	1.43744	0.150593	0.999943
ENSMUSG00000018068	Ints2	671.264	-0.00578124	0.192995	-0.0299553	0.976103	0.999943
ENSMUSG00000018076	Med13l	2241.92	-0.0481237	0.169035	-0.284697	0.775876	0.999943
ENSMUSG00000018102	H2bc4	248.934	-0.462412	0.20763	-2.2271	0.0259406	0.999943
ENSMUSG00000018126	Baiap2l2	197.517	0.269279	0.210218	1.28095	0.20021	0.999943
ENSMUSG00000018143	Mafk	253.077	-0.192812	0.183835	-1.04883	0.294255	0.999943
ENSMUSG00000018160	Med1	1313.26	0.254943	0.253548	1.0055	0.314654	0.999943
ENSMUSG00000018166	Erbb3	10.0671	0.0595334	0.644497	0.0923719	0.926403	0.999943
ENSMUSG00000018167	Stard3	509.83	-0.0813913	0.166866	-0.487764	0.625717	0.999943
ENSMUSG00000018168	Ikzf3	1.50324	0.681892	2.10676	0.323669	0.746189	NA
ENSMUSG00000018169	Mfng	20.9769	0.234553	0.684944	0.34244	0.73202	0.999943
ENSMUSG00000018171	Vmp1	2114.66	-0.0511945	0.110693	-0.462492	0.643728	0.999943
ENSMUSG00000018189	Uchl5	673.984	0.103653	0.203326	0.509786	0.610201	0.999943
ENSMUSG00000018196	Glrx2	1526.94	-0.0146474	0.147468	-0.0993257	0.92088	0.999943
ENSMUSG00000018199	Ro60	1877.33	-0.0345507	0.176946	-0.195262	0.845188	0.999943
ENSMUSG00000018209	Stk4	1435.17	-0.237156	0.167275	-1.41776	0.15626	0.999943
ENSMUSG00000018217	Pmp22	426.982	0.184234	0.20828	0.88455	0.376399	0.999943
ENSMUSG00000018238	Gdf9	25.7679	-1.14582	0.429642	-2.66692	0.0076551	0.725385
ENSMUSG00000018239	Zcchc10	123.217	0.309667	0.316069	0.979743	0.327213	0.999943
ENSMUSG00000018263	Tbx5	2.46177	-0.342867	1.47873	-0.231865	0.816643	NA
ENSMUSG00000018286	Psmb6	2177.44	0.054635	0.124688	0.438175	0.661259	0.999943
ENSMUSG00000018287	Spag7	885.953	-0.0808292	0.179869	-0.449378	0.653159	0.999943
ENSMUSG00000018293	Pfn1	2284.99	0.0764265	0.130336	0.586381	0.557619	0.999943
ENSMUSG00000018322	Tomm34	947.757	0.0650546	0.106278	0.612119	0.540459	0.999943
ENSMUSG00000018326	Ywhab	15630.8	0.0230188	0.0874334	0.263272	0.792341	0.999943
ENSMUSG00000018334	Ksr1	1087.92	0.065447	0.180371	0.362847	0.716719	0.999943
ENSMUSG00000018339	Gpx3	192.504	0.0507349	0.229307	0.221253	0.824895	0.999943
ENSMUSG00000018340	Anxa6	903.208	0.149651	0.102274	1.46323	0.143404	0.999943
ENSMUSG00000018341	Il12rb2	5.68439	-0.536038	0.876592	-0.611502	0.540867	0.999943
ENSMUSG00000018347	Zkscan6	181.362	0.180133	0.192543	0.935544	0.349508	0.999943
ENSMUSG00000018362	Kpna2	1402.2	0.0272291	0.133698	0.203661	0.838618	0.999943
ENSMUSG00000018363	Smurf2	968.639	-0.0142654	0.140523	-0.101517	0.91914	0.999943
ENSMUSG00000018372	Cep95	124.597	0.0243843	0.431523	0.0565075	0.954937	0.999943
ENSMUSG00000018377	Vezf1	743.287	-0.0601553	0.110761	-0.54311	0.587054	0.999943
ENSMUSG00000018378	2210416O15Rik	961.332	-0.15807	0.237463	-0.665659	0.505629	0.999943
ENSMUSG00000018379	Srsf1	2904.86	-0.111253	0.119685	-0.929551	0.352604	0.999943
ENSMUSG00000018387	Shroom1	112.333	0.734902	1.0899	0.674284	0.500131	0.999943
ENSMUSG00000018395	Kif3a	5192.2	-0.15409	0.11885	-1.29651	0.1948	0.999943
ENSMUSG00000018398	Septin8	2729.09	0.172913	0.0928632	1.86202	0.0625999	0.999943
ENSMUSG00000018401	Mtmr4	2773.17	0.0958497	0.0984628	0.973461	0.330324	0.999943
ENSMUSG00000018405	Mrm1	635.179	-0.19516	0.29321	-0.665598	0.505668	0.999943
ENSMUSG00000018411	Mapt	45489.8	0.0394656	0.122097	0.32323	0.746521	0.999943
ENSMUSG00000018412	Kansl1	2051.86	0.0178166	0.121077	0.147151	0.883013	0.999943
ENSMUSG00000018415	Gid4	1861.12	0.0509359	0.0956886	0.532309	0.594512	0.999943
ENSMUSG00000018417	Myo1b	904.994	-0.219067	0.14675	-1.49278	0.135494	0.999943
ENSMUSG00000018425	Dhx40	508.383	-0.0111198	0.193577	-0.0574436	0.954192	0.999943
ENSMUSG00000018427	Ypel2	572.558	-0.056871	0.136978	-0.415183	0.678008	0.999943
ENSMUSG00000018428	Akap1	1401.65	-0.101483	0.116819	-0.86872	0.385	0.999943
ENSMUSG00000018433	Nol11	735.637	0.117014	0.119621	0.97821	0.327971	0.999943
ENSMUSG00000018442	Derl2	977.52	0.103059	0.157674	0.653619	0.513357	0.999943
ENSMUSG00000018446	C1qbp	1314.81	0.172575	0.132104	1.30636	0.191429	0.999943
ENSMUSG00000018449	Rpain	171.6	-0.527721	0.248721	-2.12174	0.0338599	0.999943
ENSMUSG00000018451	6330403K07Rik	2926.57	-0.0626705	0.0962169	-0.651346	0.514823	0.999943
ENSMUSG00000018459	Slc13a3	252.475	0.014358	0.252835	0.056788	0.954714	0.999943
ENSMUSG00000018470	Kcnab3	85.5093	0.222971	0.307328	0.725515	0.468136	0.999943
ENSMUSG00000018474	Chd3	13314.6	0.00770227	0.121924	0.063173	0.949629	0.999943
ENSMUSG00000018476	Kdm6b	1939.44	0.141431	0.131698	1.0739	0.282867	0.999943
ENSMUSG00000018479	1700125H20Rik	12.2286	-0.0127744	0.673991	-0.0189533	0.984878	0.999943
ENSMUSG00000018481	Appbp2	3506.03	0.00962974	0.130086	0.0740257	0.94099	0.999943
ENSMUSG00000018486	Wnt9b	1.7453	-0.266254	1.70236	-0.156403	0.875716	NA
ENSMUSG00000018500	Adora2b	68.2669	0.0971843	0.297346	0.326839	0.74379	0.999943
ENSMUSG00000018501	Ncor1	6593.64	-0.00632834	0.166063	-0.0381081	0.969601	0.999943
ENSMUSG00000018507	Trpv2	585.298	-0.136134	0.185918	-0.732227	0.46403	0.999943
ENSMUSG00000018509	Cenpv	486.169	-0.0573169	0.206635	-0.277382	0.781487	0.999943
ENSMUSG00000018537	Pcgf2	619.386	-0.0765939	0.129519	-0.591371	0.554272	0.999943
ENSMUSG00000018541	Cwc25	433.067	-0.0478193	0.13113	-0.364672	0.715356	0.999943
ENSMUSG00000018543	1700001P01Rik	0.630243	-1.24396	2.93392	-0.423994	0.67157	NA
ENSMUSG00000018547	Pip4k2b	7163.49	-0.0596709	0.108766	-0.548616	0.583269	0.999943
ENSMUSG00000018548	Trim37	7997.8	0.0245764	0.106878	0.229947	0.818133	0.999943
ENSMUSG00000018554	Ybx2	157.143	0.0126593	0.205387	0.0616364	0.950852	0.999943
ENSMUSG00000018559	Ctdnep1	1710.88	0.165132	0.0917889	1.79904	0.0720122	0.999943
ENSMUSG00000018565	Elp5	1780.45	0.0156922	0.11486	0.13662	0.891331	0.999943
ENSMUSG00000018566	Slc2a4	23.7196	0.0814168	0.722721	0.112653	0.910306	0.999943
ENSMUSG00000018567	Gabarap	3506.15	0.0951696	0.114237	0.833092	0.404793	0.999943
ENSMUSG00000018569	Cldn7	0.840062	2.08048	2.34425	0.887483	0.374819	NA
ENSMUSG00000018570	2810408A11Rik	29.434	0.273404	0.470924	0.58057	0.56153	0.999943
ENSMUSG00000018572	Phf23	824.845	-0.29459	0.12241	-2.40658	0.0161027	0.984497
ENSMUSG00000018574	Acadvl	953.694	0.0742895	0.125269	0.59304	0.553154	0.999943
ENSMUSG00000018581	Dnah11	13.545	-1.99645	0.944111	-2.11464	0.0344609	0.999943
ENSMUSG00000018583	G3bp1	2594.07	0.0962828	0.120386	0.799781	0.423838	0.999943
ENSMUSG00000018585	Atox1	835.232	0.016382	0.160672	0.10196	0.918789	0.999943
ENSMUSG00000018589	Glra2	1531.05	-0.0557916	0.104683	-0.53296	0.594061	0.999943
ENSMUSG00000018593	Sparc	1372.47	0.367817	0.151772	2.42348	0.0153727	0.969565
ENSMUSG00000018599	Mief2	464.984	-0.0423257	0.257126	-0.16461	0.869251	0.999943
ENSMUSG00000018634	Crhr1	609.213	0.101977	0.118462	0.860842	0.389325	0.999943
ENSMUSG00000018648	Dusp14	433.821	-0.135266	0.160292	-0.843871	0.398742	0.999943
ENSMUSG00000018651	Tada2a	552.679	-0.225542	0.162997	-1.38372	0.166444	0.999943
ENSMUSG00000018654	Ikzf1	0.708368	-1.61241	2.8603	-0.56372	0.572945	NA
ENSMUSG00000018659	Pnpo	781.102	0.0121055	0.11945	0.101344	0.919277	0.999943
ENSMUSG00000018661	Cog1	1033.92	0.171493	0.12428	1.37989	0.167621	0.999943
ENSMUSG00000018666	Cbx1	1288.56	0.0325299	0.107649	0.302184	0.762512	0.999943
ENSMUSG00000018669	Cdk5rap3	1043.98	-0.0860807	0.153914	-0.559277	0.575973	0.999943
ENSMUSG00000018672	Copz2	60.0398	0.395802	0.337607	1.17237	0.241047	0.999943
ENSMUSG00000018677	Slc25a39	2248.87	0.181073	0.148773	1.21711	0.223561	0.999943
ENSMUSG00000018678	Sp2	236.308	0.0453465	0.161812	0.280241	0.779292	0.999943
ENSMUSG00000018697	Aatf	479.907	0.0885712	0.139692	0.634048	0.526049	0.999943
ENSMUSG00000018698	Lhx1	16.8394	1.51291	0.753694	2.00733	0.0447147	0.999943
ENSMUSG00000018707	Dync1h1	23473.6	-0.112789	0.140661	-0.801852	0.422639	0.999943
ENSMUSG00000018727	Cpsf4l	7.93239	-0.373973	0.766032	-0.488195	0.625412	0.999943
ENSMUSG00000018733	Pex12	224.855	-0.184382	0.229514	-0.803356	0.421769	0.999943
ENSMUSG00000018736	Ndel1	2460.55	-0.0170048	0.10178	-0.167074	0.867312	0.999943
ENSMUSG00000018740	Slc25a35	68.9096	0.051239	0.355024	0.144326	0.885243	0.999943
ENSMUSG00000018750	Zbtb4	1710.19	-0.0552853	0.153543	-0.360064	0.718799	0.999943
ENSMUSG00000018752	Tnfsfm13	9.69068	-0.489346	0.872915	-0.560588	0.575078	0.999943
ENSMUSG00000018761	Mpdu1	1247.52	-0.0174025	0.117014	-0.148722	0.881773	0.999943
ENSMUSG00000018765	Fxr2	2181.19	0.179415	0.139497	1.28615	0.19839	0.999943
ENSMUSG00000018770	Atp5g3	4565.35	-0.0380075	0.147347	-0.257946	0.796449	0.999943
ENSMUSG00000018774	Cd68	24.4214	-0.623883	0.5378	-1.16006	0.246023	0.999943
ENSMUSG00000018776	Slc35g3	7.19974	-0.662674	0.772645	-0.857669	0.391075	0.999943
ENSMUSG00000018796	Acsl1	1376.03	-0.205716	0.197253	-1.0429	0.296993	0.999943
ENSMUSG00000018800	Abca5	1152.32	-0.0075822	0.251021	-0.0302055	0.975903	0.999943
ENSMUSG00000018809	Smyd4	320.603	-0.0604126	0.177751	-0.339873	0.733952	0.999943
ENSMUSG00000018819	Lsp1	43.1296	0.148075	0.40906	0.361988	0.717361	0.999943
ENSMUSG00000018820	Zfyve27	2481.66	0.0112753	0.106953	0.105423	0.91604	0.999943
ENSMUSG00000018821	Avpi1	240.825	0.203928	0.192472	1.05952	0.289365	0.999943
ENSMUSG00000018822	Sfrp5	0.617944	-1.26235	2.56349	-0.492436	0.622411	NA
ENSMUSG00000018830	Myh11	15.2876	0.410441	0.592071	0.693228	0.488166	0.999943
ENSMUSG00000018841	Rad51d	253.471	0.0941469	0.182954	0.514593	0.606837	0.999943
ENSMUSG00000018844	Fndc8	11.5283	-0.328409	0.677328	-0.48486	0.627776	0.999943
ENSMUSG00000018845	Unc45b	16.2225	-0.543677	0.629094	-0.864222	0.387466	0.999943
ENSMUSG00000018846	Pank3	3642.47	0.00819211	0.176882	0.046314	0.96306	0.999943
ENSMUSG00000018848	Rars	1467.95	-0.148116	0.13885	-1.06673	0.286093	0.999943
ENSMUSG00000018849	Wwc1	2997.65	-0.201971	0.196193	-1.02945	0.303269	0.999943
ENSMUSG00000018858	Mrpl58	559.169	0.0752595	0.138634	0.542864	0.587224	0.999943
ENSMUSG00000018861	Fdxr	182.848	0.20424	0.206046	0.991236	0.32157	0.999943
ENSMUSG00000018862	Otop3	3.72552	-0.401107	1.08166	-0.370826	0.710767	0.999943
ENSMUSG00000018865	Sult4a1	6351.11	0.00694009	0.0993783	0.0698351	0.944325	0.999943
ENSMUSG00000018882	Mrpl45	730.225	-6.0784e-05	0.152181	-0.00039942	0.999681	0.999943
ENSMUSG00000018893	Mb	2.70235	0.170696	1.43521	0.118935	0.905327	NA
ENSMUSG00000018899	Irf1	62.1209	0.0933577	0.283883	0.32886	0.742262	0.999943
ENSMUSG00000018900	Slc22a5	423.591	-0.0604914	0.14949	-0.404651	0.685734	0.999943
ENSMUSG00000018906	P4ha2	445.494	-0.368866	0.271233	-1.35996	0.173842	0.999943
ENSMUSG00000018907	Alox12e	4.4287	1.08419	1.15115	0.941826	0.346282	0.999943
ENSMUSG00000018909	Arrb1	8080.74	-0.0318239	0.133966	-0.237552	0.812228	0.999943
ENSMUSG00000018919	Tm4sf5	10.9712	-0.505877	0.670027	-0.75501	0.450243	0.999943
ENSMUSG00000018920	Cxcl16	12.2685	-0.445583	0.716089	-0.622245	0.533781	0.999943
ENSMUSG00000018921	Pelp1	1178.7	0.197057	0.114608	1.71941	0.0855402	0.999943
ENSMUSG00000018923	Med11	271.936	0.0540669	0.184124	0.293643	0.76903	0.999943
ENSMUSG00000018931	Natd1	849.539	0.138127	0.18621	0.741782	0.458219	0.999943
ENSMUSG00000018932	Map2k3	313.949	-0.000911178	0.191849	-0.00474945	0.99621	0.999943
ENSMUSG00000018965	Ywhah	13599.8	-0.11869	0.103711	-1.14444	0.252443	0.999943
ENSMUSG00000018973	Hoxb1	1.79415	2.18548	1.845	1.18454	0.236198	NA
ENSMUSG00000018974	Sart3	596.755	-0.225098	0.129224	-1.74193	0.0815212	0.999943
ENSMUSG00000018983	E2f2	17.7387	-0.958989	0.708736	-1.3531	0.176025	0.999943
ENSMUSG00000018986	Slfn3	5.3517	-1.35189	1.00402	-1.34648	0.178146	0.999943
ENSMUSG00000018995	Nars2	440.47	-0.140246	0.207744	-0.67509	0.499619	0.999943
ENSMUSG00000018999	Slc35b4	1173.92	-0.0315461	0.0960965	-0.328276	0.742703	0.999943
ENSMUSG00000019027	Dnah1	58.8505	-0.0624642	0.289059	-0.216095	0.828914	0.999943
ENSMUSG00000019039	Dalrd3	1273.58	0.236387	0.18048	1.30977	0.190273	0.999943
ENSMUSG00000019054	Fis1	1428.95	0.00927359	0.160688	0.0577117	0.953978	0.999943
ENSMUSG00000019055	Plod1	368.268	0.0310126	0.322553	0.0961473	0.923404	0.999943
ENSMUSG00000019066	Rab3d	1509.47	0.0712335	0.172413	0.413156	0.679492	0.999943
ENSMUSG00000019080	Mfsd3	185.56	0.534223	0.200846	2.65986	0.00781729	0.728033
ENSMUSG00000019082	Slc25a22	8087.86	0.148933	0.0996655	1.49433	0.13509	0.999943
ENSMUSG00000019087	Atp6ap1	10220.5	0.028279	0.0900489	0.314041	0.75349	0.999943
ENSMUSG00000019088	Dnase1l1	17.9335	0.129792	0.548401	0.236674	0.81291	0.999943
ENSMUSG00000019102	Aldh3a1	14.5355	-0.361095	0.623258	-0.579367	0.562342	0.999943
ENSMUSG00000019122	Ccl9	1.78756	1.01939	1.63569	0.623217	0.533142	NA
ENSMUSG00000019124	Scrn1	9424.86	0.0537892	0.12801	0.420194	0.674344	0.999943
ENSMUSG00000019132	BC005537	7066.19	-0.0952491	0.0844577	-1.12777	0.259416	0.999943
ENSMUSG00000019139	Isyna1	440.329	0.176488	0.27736	0.636311	0.524574	0.999943
ENSMUSG00000019143	Hars2	437.359	-0.346749	0.171402	-2.02302	0.0430709	0.999943
ENSMUSG00000019146	Cacng2	1600.98	0.00336538	0.110407	0.0304816	0.975683	0.999943
ENSMUSG00000019158	Tmem160	784.396	-0.0227656	0.170732	-0.133341	0.893924	0.999943
ENSMUSG00000019173	Rab5c	3797.35	0.00902416	0.0973348	0.0927126	0.926132	0.999943
ENSMUSG00000019178	Styxl1	2.41985	0.603712	1.41566	0.426452	0.669778	NA
ENSMUSG00000019179	Mdh2	6576.97	0.0962432	0.112786	0.853325	0.393479	0.999943
ENSMUSG00000019188	H13	3241.39	0.0129432	0.117369	0.110278	0.912189	0.999943
ENSMUSG00000019189	Rnf145	2736.92	-0.0762434	0.127307	-0.598893	0.549244	0.999943
ENSMUSG00000019194	Scn1b	1258.11	-0.0320153	0.194216	-0.164844	0.869067	0.999943
ENSMUSG00000019210	Atp6v1e1	5070	-0.117462	0.120409	-0.975526	0.329299	0.999943
ENSMUSG00000019214	Chtf18	36.7753	-0.37611	0.571724	-0.657852	0.510633	0.999943
ENSMUSG00000019230	Lhx9	13.356	0.492534	0.720067	0.684011	0.493968	0.999943
ENSMUSG00000019232	Etnppl	0.841708	-0.64529	2.73036	-0.236339	0.81317	NA
ENSMUSG00000019235	Rps6kl1	815.359	-0.0381204	0.118692	-0.32117	0.748081	0.999943
ENSMUSG00000019254	Ppp1r12c	1349.95	-0.00261446	0.123598	-0.0211529	0.983124	0.999943
ENSMUSG00000019256	Ahr	348.575	-0.231222	0.219068	-1.05548	0.291207	0.999943
ENSMUSG00000019261	Map1s	1594.61	0.178806	0.219937	0.812985	0.416227	0.999943
ENSMUSG00000019295	Tmem129	733.636	0.0122622	0.159474	0.0768912	0.93871	0.999943
ENSMUSG00000019297	Nop9	562.273	0.0205982	0.143999	0.143044	0.886255	0.999943
ENSMUSG00000019301	Hsd17b1	14.9545	-0.683345	0.550484	-1.24135	0.214475	0.999943
ENSMUSG00000019302	Atp6v0a1	13065.9	0.206493	0.16187	1.27568	0.20207	0.999943
ENSMUSG00000019303	Psmc3ip	63.7278	0.139336	0.302619	0.460432	0.645206	0.999943
ENSMUSG00000019312	Grb7	7.8487	-0.0862148	1.00538	-0.0857536	0.931662	0.999943
ENSMUSG00000019320	Noxo1	49.3555	-0.419134	1.24765	-0.335937	0.736918	0.999943
ENSMUSG00000019326	Aoc3	0.698189	0.311582	2.53292	0.123013	0.902097	NA
ENSMUSG00000019338	Zfp687	552.714	0.0933144	0.268247	0.347868	0.72794	0.999943
ENSMUSG00000019359	Gdpd2	244.549	0.0777208	0.247127	0.314498	0.753143	0.999943
ENSMUSG00000019362	D8Ertd738e	838.741	0.0607495	0.145027	0.418884	0.675301	0.999943
ENSMUSG00000019368	Sec14l4	0.960999	1.02127	2.3386	0.436704	0.662326	NA
ENSMUSG00000019370	Calm3	38298.8	0.0142397	0.113387	0.125584	0.900061	0.999943
ENSMUSG00000019373	Cops3	1424.26	-0.351758	0.171996	-2.04515	0.0408403	0.999943
ENSMUSG00000019428	Fkbp8	5589.02	-0.0146858	0.153717	-0.0955381	0.923887	0.999943
ENSMUSG00000019432	Ddx39b	3723.54	-0.0160233	0.0927755	-0.172711	0.862879	0.999943
ENSMUSG00000019433	Gipc1	1060.14	-0.0563235	0.106889	-0.526934	0.598239	0.999943
ENSMUSG00000019437	Tlcd1	260.439	-0.11099	0.189199	-0.586627	0.557454	0.999943
ENSMUSG00000019461	Plscr3	394.622	-0.0733366	0.164125	-0.446833	0.654996	0.999943
ENSMUSG00000019464	Ptger1	58.3989	-0.386863	0.679136	-0.56964	0.568922	0.999943
ENSMUSG00000019467	Arhgef25	718.632	0.00461523	0.169066	0.0272983	0.978222	0.999943
ENSMUSG00000019470	Xab2	744.923	0.112987	0.122204	0.924579	0.355185	0.999943
ENSMUSG00000019471	Cdc37	2858.88	-0.0295944	0.16053	-0.184354	0.853735	0.999943
ENSMUSG00000019478	Rab4a	1139.56	0.105816	0.134538	0.78651	0.431569	0.999943
ENSMUSG00000019487	Trip10	79.7701	0.279965	0.543405	0.515204	0.606411	0.999943
ENSMUSG00000019494	Cops6	2064.48	0.032644	0.110764	0.294717	0.76821	0.999943
ENSMUSG00000019505	Ubb	26401.9	-0.0370148	0.146266	-0.253064	0.800219	0.999943
ENSMUSG00000019518	Ap4m1	434.148	-0.108057	0.164549	-0.656686	0.511383	0.999943
ENSMUSG00000019528	Gyg	1578.48	0.113444	0.0960392	1.18122	0.237515	0.999943
ENSMUSG00000019539	Rcn3	110.164	0.70351	0.305068	2.30608	0.0211062	0.999943
ENSMUSG00000019558	Slc6a8	2106.03	0.0195573	0.119521	0.163631	0.870022	0.999943
ENSMUSG00000019564	Arid3a	114.466	0.183943	0.225806	0.814606	0.415298	0.999943
ENSMUSG00000019577	Pdk4	113.035	-0.151569	0.391526	-0.387124	0.698664	0.999943
ENSMUSG00000019578	Ubxn6	1416.87	0.0828639	0.114507	0.723655	0.469277	0.999943
ENSMUSG00000019579	Mydgf	1219.75	0.0327734	0.139701	0.234597	0.814522	0.999943
ENSMUSG00000019590	Cyb561	1769.23	0.000149216	0.110688	0.00134807	0.998924	0.999943
ENSMUSG00000019647	Sema6a	2489.31	0.0130108	0.156596	0.0830856	0.933784	0.999943
ENSMUSG00000019659	Ccdc12	344.636	-0.0769947	0.161379	-0.477104	0.633288	0.999943
ENSMUSG00000019689	Fmc1	335.933	0.0708586	0.164621	0.430434	0.66688	0.999943
ENSMUSG00000019699	Akt3	8753.73	-0.119189	0.140092	-0.850791	0.394886	0.999943
ENSMUSG00000019710	Mrpl24	568.414	0.0245012	0.160726	0.152441	0.878839	0.999943
ENSMUSG00000019715	Gle1	1482.89	0.0518797	0.131234	0.395322	0.692606	0.999943
ENSMUSG00000019718	L3hypdh	38.9659	-0.0203169	0.439475	-0.0462299	0.963127	0.999943
ENSMUSG00000019726	Lyst	639.089	-0.278751	0.727263	-0.383288	0.701506	0.999943
ENSMUSG00000019731	Slc35e1	1979.75	0.000442516	0.104191	0.00424717	0.996611	0.999943
ENSMUSG00000019732	Calr3	32.1203	0.241348	0.371012	0.650512	0.515361	0.999943
ENSMUSG00000019734	Tmc4	44.5589	-0.0829877	0.327028	-0.253763	0.799678	0.999943
ENSMUSG00000019737	Syne4	17.7505	-0.230692	0.702683	-0.328302	0.742683	0.999943
ENSMUSG00000019738	Polr2i	359.995	0.122935	0.184522	0.666237	0.50526	0.999943
ENSMUSG00000019756	Prl8a1	31.0607	-0.777118	0.536208	-1.44928	0.147258	0.999943
ENSMUSG00000019761	Krt10	116.572	-0.108684	0.249604	-0.435425	0.663254	0.999943
ENSMUSG00000019762	Iyd	96.5354	0.256861	0.230382	1.11493	0.264879	0.999943
ENSMUSG00000019763	Rmnd1	424.461	-0.0763974	0.165044	-0.462892	0.643442	0.999943
ENSMUSG00000019767	Ccdc170	3.81359	-1.32015	1.36386	-0.967953	0.333068	0.999943
ENSMUSG00000019768	Esr1	141.869	0.438255	0.24599	1.78159	0.0748156	0.999943
ENSMUSG00000019772	Vip	51.4553	-0.137409	0.334742	-0.410491	0.681446	0.999943
ENSMUSG00000019773	Fbxo5	31.454	-1.26181	0.438751	-2.87591	0.00402866	0.526814
ENSMUSG00000019774	Mtrf1l	130.317	0.272993	0.195669	1.39518	0.162962	0.999943
ENSMUSG00000019775	Rgs17	2284.58	-0.0463231	0.182178	-0.254274	0.799284	0.999943
ENSMUSG00000019777	Hdac2	3377.14	-0.024798	0.0941749	-0.263319	0.792305	0.999943
ENSMUSG00000019779	Frk	10.0318	1.11334	0.806492	1.38047	0.167441	0.999943
ENSMUSG00000019782	Rwdd1	874.821	0.0557353	0.133983	0.415987	0.677419	0.999943
ENSMUSG00000019785	Clvs2	508.696	0.00342622	0.160558	0.0213395	0.982975	0.999943
ENSMUSG00000019787	Trdn	7.23886	-1.18929	0.900246	-1.32107	0.186478	0.999943
ENSMUSG00000019789	Hey2	45.5768	-0.0395225	0.324854	-0.121663	0.903166	0.999943
ENSMUSG00000019790	Stxbp5	2469.52	0.0373391	0.200001	0.186695	0.8519	0.999943
ENSMUSG00000019791	Hint3	295.521	-0.174861	0.23728	-0.736941	0.461158	0.999943
ENSMUSG00000019792	Trmt11	104.542	0.141556	0.246264	0.574816	0.565416	0.999943
ENSMUSG00000019794	Katna1	142.715	-0.458773	0.260165	-1.76339	0.0778345	0.999943
ENSMUSG00000019795	Pcmt1	2761.63	0.0465808	0.125583	0.370916	0.7107	0.999943
ENSMUSG00000019796	Lrp11	4342.4	0.0288108	0.0890944	0.323374	0.746412	0.999943
ENSMUSG00000019797	Mtres1	336.008	0.0465899	0.148388	0.313974	0.753541	0.999943
ENSMUSG00000019802	Sec63	1562.07	-0.00940642	0.141071	-0.0666784	0.946838	0.999943
ENSMUSG00000019803	Nr2e1	341.965	0.297205	0.249882	1.18938	0.234291	0.999943
ENSMUSG00000019804	Snx3	3361.17	0.0462835	0.116737	0.396477	0.691753	0.999943
ENSMUSG00000019806	Aig1	1539.72	0.0967205	0.116633	0.829274	0.406949	0.999943
ENSMUSG00000019808	Adat2	152.636	-0.133982	0.180945	-0.740459	0.459022	0.999943
ENSMUSG00000019809	Pex3	563.462	-0.0476162	0.185553	-0.256618	0.797474	0.999943
ENSMUSG00000019810	Fuca2	1058.53	-0.00900252	0.167069	-0.0538852	0.957027	0.999943
ENSMUSG00000019813	Cep57l1	178.148	0.138072	0.193973	0.711808	0.476584	0.999943
ENSMUSG00000019814	Ltv1	395.919	-0.00766611	0.137442	-0.0557771	0.955519	0.999943
ENSMUSG00000019817	Plagl1	1707.18	-0.141473	0.245394	-0.576514	0.564268	0.999943
ENSMUSG00000019818	Cd164	1003.86	0.193575	0.123467	1.56783	0.11692	0.999943
ENSMUSG00000019820	Utrn	702.324	0.016363	0.15007	0.109036	0.913174	0.999943
ENSMUSG00000019822	Smpd2	242.712	0.124496	0.21053	0.591345	0.554289	0.999943
ENSMUSG00000019823	Mical1	101.942	0.203454	0.263088	0.773328	0.439328	0.999943
ENSMUSG00000019826	Zbtb24	273.348	0.0160199	0.152758	0.104871	0.916478	0.999943
ENSMUSG00000019828	Grm1	1600.7	-0.0944573	0.187065	-0.504945	0.613598	0.999943
ENSMUSG00000019831	Wasf1	7238.63	0.0221703	0.0987435	0.224524	0.822349	0.999943
ENSMUSG00000019832	Rab32	21.8171	-0.350679	0.467384	-0.750302	0.453073	0.999943
ENSMUSG00000019837	Gtf3c6	672.423	0.00165798	0.164795	0.0100609	0.991973	0.999943
ENSMUSG00000019838	Slc16a10	68.2426	-0.304734	0.417589	-0.729745	0.465546	0.999943
ENSMUSG00000019841	Rev3l	4418.26	-0.0410729	0.159325	-0.257793	0.796567	0.999943
ENSMUSG00000019842	Traf3ip2	51.2021	0.419144	0.418694	1.00108	0.31679	0.999943
ENSMUSG00000019843	Fyn	6793.22	-0.0111158	0.102538	-0.108407	0.913673	0.999943
ENSMUSG00000019845	Tube1	72.4219	-0.0372172	0.268049	-0.138845	0.889573	0.999943
ENSMUSG00000019846	Lama4	53.6668	1.25815	0.456878	2.75379	0.00589089	0.649419
ENSMUSG00000019848	Popdc3	91.3359	-0.110306	0.269026	-0.410019	0.681792	0.999943
ENSMUSG00000019849	Prep	2944.68	-0.0110656	0.0936488	-0.118161	0.90594	0.999943
ENSMUSG00000019850	Tnfaip3	132.142	0.104896	0.219883	0.477056	0.633322	0.999943
ENSMUSG00000019851	Perp	160.442	-0.101381	0.201341	-0.503527	0.614594	0.999943
ENSMUSG00000019852	Arfgef3	5672.63	-0.164276	0.233758	-0.702763	0.482204	0.999943
ENSMUSG00000019853	Hebp2	97.4631	0.0881586	0.263936	0.334015	0.738368	0.999943
ENSMUSG00000019854	Reps1	1216.6	0.216456	0.111013	1.94983	0.0511967	0.999943
ENSMUSG00000019856	Fam184a	641.286	-0.820264	0.305406	-2.68582	0.0072353	0.713168
ENSMUSG00000019857	Asf1a	314.956	0.0617881	0.172794	0.357582	0.720656	0.999943
ENSMUSG00000019861	Gopc	2408.4	-0.109788	0.0987896	-1.11133	0.266425	0.999943
ENSMUSG00000019863	Qrsl1	265.946	0.161229	0.164016	0.983007	0.325604	0.999943
ENSMUSG00000019864	Rtn4ip1	308.312	0.145075	0.142329	1.01929	0.308064	0.999943
ENSMUSG00000019865	Nmbr	51.3942	0.0899552	0.347503	0.258862	0.795742	0.999943
ENSMUSG00000019866	Crybg1	10.8195	-0.1769	0.673357	-0.262713	0.792772	0.999943
ENSMUSG00000019868	Vta1	1167.41	0.00688329	0.107543	0.0640053	0.948966	0.999943
ENSMUSG00000019872	Smpdl3a	348.56	-0.143636	0.225312	-0.637499	0.5238	0.999943
ENSMUSG00000019873	Reep3	702.818	-0.00815009	0.130513	-0.0624464	0.950207	0.999943
[truncated: 23,566 more rows]

## Sheet: Lucif_v_Nsd1-sh5
	GeneSymbol	baseMean	log2FoldChange	lfcSE	stat	pvalue	padj
ENSMUSG00000000001	Gnai3	2627.15	-0.478447	0.0892204	-5.36253	8.20661e-08	5.68896e-06
ENSMUSG00000000028	Cdc45	90.0401	0.36356	0.304111	1.19549	0.231897	0.539685
ENSMUSG00000000031	H19	44.986	0.733568	0.432794	1.69496	0.0900834	0.317093
ENSMUSG00000000037	Scml2	63.4191	-0.928367	0.375377	-2.47316	0.0133926	0.0925169
ENSMUSG00000000049	Apoh	4.07667	0.235793	1.21319	0.194358	0.845896	NA
ENSMUSG00000000056	Narf	3942.24	-0.188015	0.0993189	-1.89305	0.0583518	0.244469
ENSMUSG00000000058	Cav2	1113.05	0.620713	0.164928	3.76353	0.000167533	0.00352924
ENSMUSG00000000078	Klf6	3537.74	0.306302	0.135542	2.25982	0.0238323	0.136049
ENSMUSG00000000085	Scmh1	1451.66	0.171861	0.119108	1.4429	0.149049	0.421827
ENSMUSG00000000088	Cox5a	3362.05	-0.185383	0.115362	-1.60696	0.108063	0.352583
ENSMUSG00000000093	Tbx2	2.84703	0.806089	1.24284	0.648584	0.516608	NA
ENSMUSG00000000094	Tbx4	1.03809	1.85704	2.20364	0.842715	0.399388	NA
ENSMUSG00000000120	Ngfr	68.9991	0.607476	0.378226	1.60612	0.108248	0.352964
ENSMUSG00000000125	Wnt3	104.399	0.292357	0.215616	1.35592	0.175126	0.461109
ENSMUSG00000000126	Wnt9a	387.865	-0.196281	0.161831	-1.21288	0.225175	0.530564
ENSMUSG00000000127	Fer	870.599	0.10553	0.127392	0.828387	0.407452	0.704174
ENSMUSG00000000131	Xpo6	2844.13	-0.125511	0.0827039	-1.51759	0.129118	0.390163
ENSMUSG00000000134	Tfe3	1145.6	0.036834	0.14455	0.254819	0.798863	0.933224
ENSMUSG00000000142	Axin2	375.127	-0.106996	0.201005	-0.532305	0.594515	0.83638
ENSMUSG00000000148	Brat1	811.45	-0.148049	0.104518	-1.41649	0.156633	0.433622
ENSMUSG00000000149	Gna12	3248.44	-0.1007	0.0837231	-1.20278	0.229063	0.53644
ENSMUSG00000000154	Slc22a18	1.95163	0.645961	1.57706	0.409598	0.682101	NA
ENSMUSG00000000167	Pih1d2	30.9584	-0.368733	0.436599	-0.844558	0.398357	0.6968
ENSMUSG00000000168	Dlat	2984	0.0564311	0.0837028	0.674184	0.500194	0.774141
ENSMUSG00000000171	Sdhd	2845.12	-0.0330236	0.123411	-0.267591	0.789014	0.929478
ENSMUSG00000000182	Fgf23	10.1153	0.925696	0.731805	1.26495	0.20589	0.506024
ENSMUSG00000000184	Ccnd2	12018.3	0.377026	0.146249	2.57798	0.00993802	0.0762839
ENSMUSG00000000194	Gpr107	3116.6	0.242784	0.149483	1.62416	0.104341	0.345389
ENSMUSG00000000197	Nalcn	3259.12	0.35751	0.105246	3.3969	0.000681533	0.0106253
ENSMUSG00000000202	Btbd17	311.996	-0.81984	0.196701	-4.16794	3.07362e-05	0.000880958
ENSMUSG00000000204	Slfn4	1.21482	0.533998	2.14468	0.248987	0.803371	NA
ENSMUSG00000000214	Th	9.71747	-0.41962	0.722568	-0.580735	0.561419	0.816672
ENSMUSG00000000216	Scnn1g	0.892537	1.48896	2.25654	0.659841	0.509356	NA
ENSMUSG00000000223	Drp2	1620.93	0.0864147	0.133312	0.648213	0.516847	0.786841
ENSMUSG00000000244	Tspan32	2.31427	-0.0139883	1.86721	-0.00749155	0.994023	NA
ENSMUSG00000000247	Lhx2	4242.44	-0.210037	0.156665	-1.34068	0.180024	0.468325
ENSMUSG00000000253	Gmpr	443.37	-0.082833	0.171545	-0.482866	0.629191	0.854513
ENSMUSG00000000263	Glra1	0.416419	1.81505	3.27217	0.554692	0.579105	NA
ENSMUSG00000000266	Mid2	1007.92	0.117755	0.205766	0.57228	0.567132	0.81965
ENSMUSG00000000275	Trim25	67.4858	0.508456	0.265431	1.91559	0.0554178	0.236964
ENSMUSG00000000276	Dgke	1931.46	-0.00901019	0.134271	-0.0671045	0.946499	0.98583
ENSMUSG00000000278	Scpep1	1204.37	0.249292	0.100441	2.48198	0.0130653	0.0909895
ENSMUSG00000000282	Mnt	2285.17	0.0248739	0.132022	0.188407	0.850557	0.954826
ENSMUSG00000000290	Itgb2	6.37291	0.901072	0.89366	1.00829	0.313313	NA
ENSMUSG00000000295	Hddc2	323.349	-0.00626955	0.178032	-0.0352159	0.971908	0.991136
ENSMUSG00000000296	Tpd52l1	200.739	-0.498172	0.175216	-2.84318	0.00446659	0.0426964
ENSMUSG00000000301	Pemt	76.6539	-0.171038	0.31687	-0.539772	0.589354	0.833183
ENSMUSG00000000303	Cdh1	2.09326	0.500599	1.82274	0.274642	0.783591	NA
ENSMUSG00000000305	Cdh4	2654.19	-0.426817	0.24074	-1.77294	0.0762392	0.287609
ENSMUSG00000000308	Ckmt1	2220.95	-0.264068	0.122237	-2.16029	0.0307502	0.16147
ENSMUSG00000000317	Bcl6b	144.032	1.30469	0.207907	6.27536	3.48826e-10	4.48831e-08
ENSMUSG00000000318	Clec10a	1.64309	-1.70223	1.84078	-0.92473	0.355106	NA
ENSMUSG00000000320	Alox12	1.30307	0.589634	1.76552	0.333972	0.738401	NA
ENSMUSG00000000325	NA	1515.98	-0.280617	0.119395	-2.35033	0.018757	0.11701
ENSMUSG00000000326	Comt	1686.29	-0.312006	0.10113	-3.08519	0.0020342	0.0241098
ENSMUSG00000000339	Rtca	1297.55	0.0121915	0.150495	0.0810092	0.935435	0.983791
ENSMUSG00000000340	Dbt	646.669	-0.00620556	0.198464	-0.031268	0.975056	0.992198
ENSMUSG00000000346	Dazap2	2703.29	-0.440284	0.0934468	-4.7116	2.45778e-06	0.000105802
ENSMUSG00000000355	Mcts1	1015.13	0.0609724	0.146725	0.415556	0.677735	0.877883
ENSMUSG00000000365	Rnf17	25.4993	0.78532	0.46954	1.67253	0.0944196	0.326634
ENSMUSG00000000374	Trappc10	3766.61	-0.0831953	0.13179	-0.631274	0.527861	0.794345
ENSMUSG00000000378	Ccm2	1413.42	-0.243315	0.176382	-1.37948	0.167747	0.449325
ENSMUSG00000000384	Tbrg4	707.98	0.00473778	0.127928	0.0370348	0.970457	0.991136
ENSMUSG00000000385	Tmprss2	5.08011	1.50731	1.40394	1.07362	0.282991	NA
ENSMUSG00000000386	Mx1	3.72376	0.671813	1.12403	0.59768	0.550054	NA
ENSMUSG00000000392	Fap	12.5376	-0.121032	0.774037	-0.156364	0.875746	0.963039
ENSMUSG00000000394	Gcg	0.737511	0.75312	2.80369	0.268617	0.788224	NA
ENSMUSG00000000399	Ndufa9	2464.81	-0.079381	0.109117	-0.727482	0.466931	0.749258
ENSMUSG00000000402	Egfl6	11.4818	0.643549	0.625406	1.02901	0.303475	0.616219
ENSMUSG00000000409	Lck	407.366	0.215236	0.141871	1.51713	0.129234	0.390359
ENSMUSG00000000411	Tssk3	3.70422	3.00287	1.43537	2.09205	0.0364343	NA
ENSMUSG00000000416	Cttnbp2	1658.1	0.530861	0.245652	2.16103	0.0306933	0.161361
ENSMUSG00000000420	Galnt1	1516.32	0.210889	0.145366	1.45074	0.146851	0.417558
ENSMUSG00000000439	Mkrn2	1743.21	-0.0945308	0.0890852	-1.06113	0.288632	0.602284
ENSMUSG00000000440	Pparg	21.0688	0.654342	0.462097	1.41603	0.156768	0.433622
ENSMUSG00000000441	Raf1	3137.58	-0.24321	0.142813	-1.703	0.0885686	0.314285
ENSMUSG00000000486	Septin1	18.9214	1.50123	0.711922	2.10869	0.0349711	0.176833
ENSMUSG00000000489	Pdgfb	779.76	-0.146395	0.122891	-1.19126	0.233553	0.541775
ENSMUSG00000000530	Acvrl1	8.39907	0.488466	0.874836	0.558352	0.576604	0.825859
ENSMUSG00000000531	Tamalin	335.808	0.436535	0.170725	2.55694	0.0105597	0.0788559
ENSMUSG00000000532	Acvr1b	5266.19	-0.143286	0.0718073	-1.99542	0.0459967	0.211099
ENSMUSG00000000538	Tom1l2	5418	-0.128275	0.121215	-1.05824	0.289944	0.603418
ENSMUSG00000000544	Gpa33	0.479928	0.361235	3.24042	0.111478	0.911237	NA
ENSMUSG00000000552	Zfp385a	884.808	-0.202378	0.128619	-1.57347	0.115609	0.365894
ENSMUSG00000000555	Itga5	176.826	-0.0385665	0.207448	-0.185909	0.852516	0.955364
ENSMUSG00000000560	Gabra2	8960.59	0.173461	0.138677	1.25083	0.210997	0.512659
ENSMUSG00000000561	Wdr77	2049	-0.0764068	0.100598	-0.759527	0.447537	0.734742
ENSMUSG00000000562	Adora3	1.36779	1.06234	2.07332	0.512384	0.608382	NA
ENSMUSG00000000563	Atp5pb	5967.2	-0.0914973	0.0890132	-1.02791	0.303993	0.616695
ENSMUSG00000000567	Sox9	773.727	-0.447151	0.179626	-2.48934	0.0127979	0.0899022
ENSMUSG00000000568	Hnrnpd	5231.59	-0.032022	0.123658	-0.258956	0.795669	0.932294
ENSMUSG00000000579	Dynlt1c	54.7632	0.120563	0.477203	0.252645	0.800543	0.934271
ENSMUSG00000000581	C1d	1670.42	0.234678	0.181491	1.29306	0.195991	0.491595
ENSMUSG00000000594	Gm2a	2527.42	-0.302336	0.108987	-2.77404	0.00553642	0.0499843
ENSMUSG00000000600	Krit1	853.187	0.0581394	0.10591	0.548952	0.583039	0.829676
ENSMUSG00000000605	Clcn4	8996.17	0.15124	0.141799	1.06658	0.286162	0.599931
ENSMUSG00000000606	Vmn2r88	3.7544	0.756232	1.08616	0.696244	0.486276	NA
ENSMUSG00000000617	Grm6	1.094	-0.427499	2.21646	-0.192875	0.847057	NA
ENSMUSG00000000627	Sema4f	1841.62	-0.914187	0.105539	-8.66205	4.63342e-18	3.06921e-15
ENSMUSG00000000628	Hk2	902.227	-0.716786	0.276103	-2.59608	0.00942946	0.0735481
ENSMUSG00000000631	Myo18a	5039.74	0.259037	0.14983	1.72888	0.0838306	0.303793
ENSMUSG00000000632	Sez6	6768.41	0.187855	0.102154	1.83894	0.0659234	0.26312
ENSMUSG00000000673	Haao	0.504498	2.11491	3.03572	0.696674	0.486007	NA
ENSMUSG00000000682	Cd52	0.590842	0.613668	2.9859	0.205522	0.837165	NA
ENSMUSG00000000686	Abhd15	19.8574	0.14211	0.524511	0.270938	0.786439	0.929094
ENSMUSG00000000690	Hoxb6	0.724395	0.999645	2.89562	0.345226	0.729924	NA
ENSMUSG00000000693	Loxl3	84.0806	-0.592956	0.476427	-1.24459	0.213282	0.516248
ENSMUSG00000000706	Btn1a1	1.99742	-0.469117	1.952	-0.240327	0.810077	NA
ENSMUSG00000000708	Kat2b	246.869	0.13736	0.292589	0.469465	0.638737	0.859418
ENSMUSG00000000711	Rab5b	4979.36	-0.182998	0.0766237	-2.38827	0.016928	0.109338
ENSMUSG00000000724	Cryba1	1.46639	2.68291	1.9702	1.36175	0.173277	NA
ENSMUSG00000000731	Aire	4.34541	1.48489	1.27848	1.16145	0.24546	NA
ENSMUSG00000000732	Icosl	19.4304	-0.342012	0.498349	-0.686289	0.492531	0.768896
ENSMUSG00000000738	Spg7	1089.79	0.17913	0.202729	0.883595	0.376915	0.68183
ENSMUSG00000000739	Sult5a1	8.87332	0.883889	0.843309	1.04812	0.294583	0.608337
ENSMUSG00000000740	Rpl13	2541.11	-0.173138	0.243447	-0.711192	0.476965	0.7572
ENSMUSG00000000743	Chmp1a	4339.98	-0.16759	0.110705	-1.51384	0.130066	0.391952
ENSMUSG00000000751	Rpa1	1183.03	-0.0184336	0.120461	-0.153026	0.878378	0.963968
ENSMUSG00000000753	Serpinf1	204.923	0.261483	0.332132	0.787287	0.431114	0.72297
ENSMUSG00000000759	Tubgcp3	1131.57	0.0597808	0.123578	0.483748	0.628565	0.854378
ENSMUSG00000000766	Oprm1	39.58	-0.236474	0.993948	-0.237913	0.811948	0.937818
ENSMUSG00000000776	Polr3d	808.403	-0.198773	0.235067	-0.845602	0.397775	0.696515
ENSMUSG00000000782	Tcf7	13.9506	0.157118	0.587205	0.267569	0.789031	0.929478
ENSMUSG00000000787	Ddx3x	7121.32	0.294771	0.157828	1.86768	0.0618069	0.253303
ENSMUSG00000000791	Il12rb1	18.0273	0.342256	0.497484	0.687974	0.491469	0.767948
ENSMUSG00000000792	Slc5a5	81.4857	1.22581	0.303408	4.04014	5.34183e-05	0.00139066
ENSMUSG00000000794	Kcnn3	860.239	-0.268564	0.154991	-1.73278	0.0831354	0.302027
ENSMUSG00000000804	Usp32	4068.24	0.34109	0.218841	1.55862	0.119087	0.372486
ENSMUSG00000000805	Car4	34.5052	0.0840564	0.485298	0.173206	0.86249	0.958785
ENSMUSG00000000811	Txnrd3	521.244	-0.118349	0.147587	-0.801893	0.422615	0.716875
ENSMUSG00000000817	Fasl	3.79741	0.153416	1.39835	0.109712	0.912638	NA
ENSMUSG00000000823	Zfp512b	3325.97	-0.130054	0.119354	-1.08965	0.275868	0.590108
ENSMUSG00000000826	Dnajc5	15510.7	0.139797	0.0869359	1.60805	0.107825	0.352438
ENSMUSG00000000827	Tpd52l2	1260.47	-0.013381	0.128913	-0.103798	0.917329	0.977621
ENSMUSG00000000838	Fmr1	2578.75	0.259849	0.126246	2.05828	0.0395637	0.191036
ENSMUSG00000000861	Bcl11a	2690.5	-0.134349	0.0936493	-1.43459	0.151403	0.425713
ENSMUSG00000000869	Il4	158.687	-0.594287	0.178399	-3.33122	0.00086467	0.0127913
ENSMUSG00000000876	Pxmp4	765.601	-0.200857	0.13845	-1.45076	0.146847	0.417558
ENSMUSG00000000881	Dlg3	5325.93	-0.103641	0.126215	-0.82115	0.411561	0.708311
ENSMUSG00000000884	Gnb1l	239.908	-0.562733	0.314508	-1.78925	0.0735751	0.281874
ENSMUSG00000000889	Dbh	11.4439	0.177293	0.618227	0.286776	0.774284	0.923528
ENSMUSG00000000901	Mmp11	63.5536	0.336699	0.591622	0.569111	0.569281	0.821485
ENSMUSG00000000902	Smarcb1	1978.94	-0.160694	0.121146	-1.32645	0.184692	0.47501
ENSMUSG00000000903	Vpreb3	1.64507	3.80612	2.05257	1.85432	0.0636937	NA
ENSMUSG00000000915	Hip1r	2284.05	0.320098	0.106809	2.99691	0.00272729	0.02984
ENSMUSG00000000916	Nsun5	242.439	-0.209391	0.20872	-1.00322	0.315756	0.627687
ENSMUSG00000000934	Top1mt	503.798	0.365736	0.215074	1.70051	0.0890353	0.315264
ENSMUSG00000000948	NA	621.317	-0.863419	0.280904	-3.07371	0.00211413	0.024925
ENSMUSG00000000957	Mmp14	884.261	-0.217977	0.124143	-1.75585	0.0791146	0.293414
ENSMUSG00000000958	Slc7a7	29.8839	0.505624	0.506189	0.998885	0.317851	0.62996
ENSMUSG00000000959	Oxa1l	1452.47	-0.282174	0.0953256	-2.96011	0.00307528	0.0325067
ENSMUSG00000000976	Heatr6	794.065	-0.0770812	0.237112	-0.325084	0.745118	0.909406
ENSMUSG00000000983	Wfdc18	2.27248	1.25331	1.49624	0.837638	0.402234	NA
ENSMUSG00000001014	Icam4	18.4203	1.95681	0.693725	2.82074	0.00479135	0.0448186
ENSMUSG00000001016	Ilf2	2572.27	-0.0150111	0.0840547	-0.178587	0.858262	0.957401
ENSMUSG00000001017	Chtop	5082.37	-0.0103552	0.108295	-0.0956202	0.923822	0.979805
ENSMUSG00000001018	Snapin	982.649	-0.217287	0.106146	-2.04706	0.0406526	0.194821
ENSMUSG00000001020	S100a4	6.26457	-1.37829	0.887053	-1.55378	0.120236	NA
ENSMUSG00000001021	S100a3	3.07448	-0.592026	1.2032	-0.492045	0.622688	NA
ENSMUSG00000001025	S100a6	48.9014	-0.137215	0.468295	-0.293009	0.769515	0.922066
ENSMUSG00000001034	Mapk7	1837.65	-0.428672	0.111597	-3.84124	0.000122415	0.00273333
ENSMUSG00000001036	Epn2	3028.99	0.130005	0.123966	1.04871	0.294312	0.608294
ENSMUSG00000001039	B9d1	193.1	-0.112146	0.203132	-0.552082	0.580892	0.828027
ENSMUSG00000001052	Sec24b	2110.31	0.116722	0.118644	0.983799	0.325214	0.637141
ENSMUSG00000001053	N4bp3	293.643	-0.877302	0.182899	-4.79664	1.6135e-06	7.3616e-05
ENSMUSG00000001054	Rmnd5b	1065.82	-0.204142	0.144152	-1.41615	0.156731	0.433622
ENSMUSG00000001056	Nhp2	821.193	-0.118799	0.180391	-0.658565	0.510175	0.781705
ENSMUSG00000001062	Vps9d1	1441.62	0.194468	0.130455	1.49069	0.136042	0.40115
ENSMUSG00000001065	Zfp276	510.914	-0.439372	0.804968	-0.545826	0.585186	0.830745
ENSMUSG00000001076	C1ql4	6.50516	-0.895995	1.09555	-0.817853	0.413441	NA
ENSMUSG00000001082	Mfsd10	412.19	-0.255989	0.240647	-1.06375	0.287442	0.601344
ENSMUSG00000001089	Luzp1	1115.27	0.132502	0.312382	0.424165	0.671445	0.875489
ENSMUSG00000001098	Kctd10	1646.1	0.152581	0.093155	1.63792	0.101438	0.339865
ENSMUSG00000001100	Poldip2	2160.99	-0.0058282	0.110953	-0.0525286	0.958108	0.988335
ENSMUSG00000001103	Sebox	7.92523	0.52825	0.808218	0.653598	0.513371	0.784696
ENSMUSG00000001105	Ift20	1101.76	0.0508274	0.168374	0.301872	0.76275	0.91819
ENSMUSG00000001119	Col6a1	301.176	-0.0204091	0.169755	-0.120227	0.904304	0.973484
ENSMUSG00000001120	Pcbp3	1861.88	-0.49032	0.129297	-3.79221	0.000149314	0.00320587
ENSMUSG00000001123	Lgals9	1.61041	-1.08522	1.9839	-0.547012	0.58437	NA
ENSMUSG00000001127	Araf	3776.34	-0.0804321	0.13545	-0.593816	0.552635	0.810619
ENSMUSG00000001128	Cfp	68.7117	-0.151893	0.495472	-0.306562	0.759177	0.916248
ENSMUSG00000001131	Timp1	15.7684	1.46196	0.637369	2.29375	0.0218051	0.129357
ENSMUSG00000001134	Uxt	85.2873	-0.125541	0.259747	-0.483322	0.628867	0.854398
ENSMUSG00000001138	Cnnm3	851.768	-0.0668713	0.14573	-0.458871	0.646327	0.864331
ENSMUSG00000001143	Lman2l	1762.91	-0.169055	0.0997509	-1.69477	0.0901193	0.317093
ENSMUSG00000001150	Mcm3ap	1744.74	-0.211777	0.0974586	-2.17299	0.0297808	0.158426
ENSMUSG00000001151	Pcnt	377.794	0.0573159	0.351844	0.162902	0.870596	0.961386
ENSMUSG00000001155	Ftcd	5.00843	2.74654	1.241	2.21317	0.0268858	NA
ENSMUSG00000001156	Mxd1	361.248	-0.460333	0.221577	-2.07753	0.037753	0.186055
ENSMUSG00000001157	Gmcl1	909.024	-0.0397761	0.101548	-0.391698	0.695282	0.887703
ENSMUSG00000001158	Snrnp27	562.186	-0.26549	0.212418	-1.24985	0.211355	0.513111
ENSMUSG00000001166	Oas1c	39.4439	1.38238	0.511292	2.7037	0.00685726	0.0580692
ENSMUSG00000001173	Ocrl	1556.37	-0.153935	0.0961683	-1.60069	0.109446	0.355512
ENSMUSG00000001175	Calm1	70083.8	-0.0402579	0.102201	-0.39391	0.693648	0.886596
ENSMUSG00000001211	Agpat3	9056.21	-0.407081	0.102068	-3.98834	6.65373e-05	0.00165972
ENSMUSG00000001225	Slc26a3	4.78395	2.69567	1.21252	2.22319	0.0262028	NA
ENSMUSG00000001227	Sema6b	4622.04	-0.126972	0.0975743	-1.30129	0.19316	0.48719
ENSMUSG00000001228	Uhrf1	155.073	1.33432	0.376032	3.54842	0.000387554	0.00678883
ENSMUSG00000001229	Dpp9	1287.06	-0.121511	0.10386	-1.16995	0.242021	0.551338
ENSMUSG00000001240	Ramp2	188.933	-0.0919797	0.210802	-0.436332	0.662596	0.870767
ENSMUSG00000001247	Lsr	22.2284	-0.762627	0.552038	-1.38148	0.167132	0.448285
ENSMUSG00000001248	Gramd1a	4388.4	-0.135582	0.133395	-1.0164	0.309441	0.621279
ENSMUSG00000001249	Hpn	2.06757	1.79742	2.30209	0.780777	0.434933	NA
ENSMUSG00000001260	Gabrg1	1325.12	-0.0154823	0.166926	-0.0927499	0.926102	0.980491
ENSMUSG00000001270	Ckb	13970.4	-0.351842	0.0990136	-3.55348	0.000380176	0.00667267
ENSMUSG00000001280	Sp1	659.796	0.590389	0.687155	0.859179	0.390242	0.690348
ENSMUSG00000001281	Itgb7	12.9815	-1.03294	0.749811	-1.37761	0.168325	0.450335
ENSMUSG00000001285	Myg1	392.556	-0.253892	0.199035	-1.27562	0.202091	0.500056
ENSMUSG00000001288	Rarg	181.359	0.363801	0.205398	1.7712	0.0765275	0.288027
ENSMUSG00000001289	Pfdn5	2266.81	-0.278103	0.143673	-1.93567	0.0529084	0.230797
ENSMUSG00000001300	Efnb2	4825.05	-0.0193522	0.103336	-0.187274	0.851446	0.954842
ENSMUSG00000001305	Rrp15	231.831	0.0556662	0.165373	0.336611	0.73641	0.90567
ENSMUSG00000001313	Rnd2	917.255	-0.260016	0.155439	-1.67278	0.0943702	0.326564
ENSMUSG00000001323	Srr	3633.34	0.0849232	0.0959562	0.885021	0.376145	0.681307
ENSMUSG00000001333	Sync	7.38251	-0.906882	0.827991	-1.09528	0.273394	0.587346
ENSMUSG00000001334	Fndc5	458.717	-0.294781	0.128213	-2.29915	0.0214962	0.128111
ENSMUSG00000001348	Acp5	6.45738	-0.389947	1.24054	-0.314338	0.753264	NA
ENSMUSG00000001349	Cnn1	11.3179	-0.0682469	0.710712	-0.096026	0.9235	0.979805
ENSMUSG00000001366	Fbxo9	2157.5	-0.107066	0.146708	-0.729792	0.465517	0.748048
ENSMUSG00000001376	Vps50	2018.23	0.0660008	0.125817	0.524577	0.599877	0.83915
ENSMUSG00000001380	Hars	3292.79	0.0034138	0.0992731	0.034388	0.972568	0.991136
ENSMUSG00000001383	Zmat2	3789.36	0.309941	0.127008	2.44032	0.0146743	0.0986346
ENSMUSG00000001403	Ube2c	128.378	2.01699	0.315141	6.40028	1.55091e-10	2.16703e-08
ENSMUSG00000001415	Smg5	2540.28	-0.0926976	0.100821	-0.91943	0.357871	0.666806
ENSMUSG00000001416	Cct3	4838.09	-0.132327	0.153849	-0.860109	0.389729	0.690006
ENSMUSG00000001418	Glmp	751.634	-0.0884863	0.138486	-0.638956	0.522852	0.791454
ENSMUSG00000001419	Mef2d	5354.61	0.0791966	0.0773941	1.02329	0.30617	0.618544
ENSMUSG00000001420	Tmem79	11.7785	0.17104	0.614822	0.278194	0.780863	0.926848
ENSMUSG00000001424	Snd1	3380.92	0.0378679	0.141734	0.267176	0.789334	0.929561
ENSMUSG00000001435	Col18a1	196.854	0.48191	0.319251	1.5095	0.13117	0.393819
ENSMUSG00000001436	Slc19a1	656.21	-0.313887	0.188519	-1.66502	0.0959093	0.329176
ENSMUSG00000001440	Kpnb1	7682.48	0.0417805	0.127736	0.327086	0.743603	0.909061
ENSMUSG00000001441	Npepps	5573.77	-0.0996474	0.0856348	-1.16363	0.244573	0.554283
ENSMUSG00000001444	Tbx21	7.60703	-1.25806	0.91744	-1.37127	0.170289	0.453646
ENSMUSG00000001445	Mrpl10	1489.86	-0.0591634	0.146655	-0.40342	0.686639	0.882268
ENSMUSG00000001467	Cyp51	10643.8	0.269579	0.091465	2.94734	0.00320516	0.0334447
ENSMUSG00000001472	Tcf25	11293.4	-0.198205	0.0719464	-2.7549	0.00587102	0.0522924
ENSMUSG00000001473	Tubb6	191.924	0.838853	0.217999	3.84797	0.000119103	0.00267271
ENSMUSG00000001482	Def8	1976.6	-0.110469	0.119212	-0.926661	0.354103	0.662738
ENSMUSG00000001493	Meox1	35.8166	0.679911	0.372965	1.82299	0.0683056	0.269739
ENSMUSG00000001494	Sost	1.85426	-1.48964	1.87853	-0.792982	0.427788	NA
ENSMUSG00000001496	Nkx2-1	1.87181	-0.209568	1.43508	-0.146032	0.883896	NA
ENSMUSG00000001497	Pax9	3.05145	0.676993	1.50061	0.451145	0.651885	NA
ENSMUSG00000001506	Col1a1	36.7529	1.85457	0.754463	2.45814	0.0139659	0.0950817
ENSMUSG00000001507	Itga3	1034.07	-0.346934	0.159478	-2.17544	0.0295971	0.15773
ENSMUSG00000001508	Sgca	16.6889	-0.225145	1.11183	-0.2025	0.839526	0.950531
ENSMUSG00000001510	Dlx3	1.35534	0.269848	1.7599	0.153332	0.878137	NA
ENSMUSG00000001517	Foxm1	157.094	1.5341	0.243264	6.30632	2.8574e-10	3.71183e-08
ENSMUSG00000001518	Itfg2	400.012	-0.63532	0.24001	-2.64706	0.00811958	0.0660385
ENSMUSG00000001520	Nrip2	175.721	0.754075	0.200453	3.76185	0.000168661	0.00354267
ENSMUSG00000001521	Tulp3	621.472	-0.0883779	0.165755	-0.533185	0.593905	0.836012
ENSMUSG00000001524	Gtf2h4	385.521	-0.398807	0.419647	-0.95034	0.34194	0.651658
ENSMUSG00000001525	Tubb5	42004.7	-0.278607	0.111854	-2.4908	0.0127455	0.0897455
ENSMUSG00000001542	Ell2	153.173	0.639581	0.271067	2.3595	0.0182998	0.115284
ENSMUSG00000001552	Jup	1773.18	-0.121508	0.218869	-0.555162	0.578784	0.826999
ENSMUSG00000001555	Fkbp10	308.512	0.328331	0.29868	1.09927	0.27165	0.585779
ENSMUSG00000001558	Klhl10	30.727	0.101661	0.422619	0.24055	0.809904	0.937529
ENSMUSG00000001569	Nom1	673.097	0.278411	0.107182	2.59755	0.00938907	0.0733611
ENSMUSG00000001576	Ergic1	5569.13	-0.116751	0.09968	-1.17126	0.241496	0.550837
ENSMUSG00000001583	Tnk1	3.53289	-1.31289	1.42866	-0.918968	0.358112	NA
ENSMUSG00000001588	Acap1	2.09455	1.37761	1.49148	0.923658	0.355664	NA
ENSMUSG00000001604	Tcea3	16.0482	0.997811	0.590451	1.68991	0.0910445	0.319009
ENSMUSG00000001622	Csn3	0.886012	1.70132	2.71567	0.62648	0.531	NA
ENSMUSG00000001627	Ifrd1	1706.86	0.490386	0.114355	4.28827	1.80073e-05	0.00057103
ENSMUSG00000001630	Stk38l	516.902	0.168522	0.128005	1.31652	0.187998	0.479651
ENSMUSG00000001632	Brpf1	648.013	0.0287192	0.128153	0.224102	0.822678	0.942938
ENSMUSG00000001642	Akr1b3	1830.26	-0.274704	0.0860845	-3.1911	0.00141735	0.018409
ENSMUSG00000001655	Hoxc13	0.40211	1.77658	3.29553	0.539087	0.589827	NA
ENSMUSG00000001657	Hoxc8	0.449256	0.140159	3.27605	0.0427828	0.965875	NA
ENSMUSG00000001663	Gstt1	68.7025	0.912459	0.296159	3.08097	0.00206326	0.0244057
ENSMUSG00000001665	Gstt3	29.8592	0.863598	0.600326	1.43855	0.150279	0.423658
ENSMUSG00000001666	Ddt	331.746	-0.51686	0.140891	-3.6685	0.000243978	0.0047327
ENSMUSG00000001672	Marveld3	2.47193	0.531631	1.33132	0.399325	0.689654	NA
ENSMUSG00000001674	Ddx18	603.912	-0.0806344	0.106254	-0.758881	0.447924	0.7351
ENSMUSG00000001687	Ubl3	2418.43	0.224917	0.0897178	2.50694	0.012178	0.0867397
ENSMUSG00000001700	Gramd3	362.784	-0.595804	0.140454	-4.24197	2.21562e-05	0.000678533
ENSMUSG00000001707	Eef1e1	1262.89	-0.242023	0.19053	-1.27026	0.203991	0.502879
ENSMUSG00000001729	Akt1	5128.84	-0.253223	0.0996872	-2.54018	0.0110796	0.08148
ENSMUSG00000001741	Il16	29.5231	-0.741845	0.578189	-1.28305	0.199475	0.496343
ENSMUSG00000001750	Tcirg1	121.28	0.0280354	0.36141	0.0775721	0.938168	0.983932
ENSMUSG00000001751	Naglu	333.66	-0.702436	0.186256	-3.77134	0.000162372	0.00344079
ENSMUSG00000001755	Coasy	1013.84	-0.11171	0.118801	-0.940314	0.347056	0.656211
ENSMUSG00000001761	Smo	603.353	-0.271502	0.131042	-2.07186	0.0382781	0.187517
ENSMUSG00000001763	Tspan33	441.608	-0.400981	0.137839	-2.90905	0.00362534	0.0367077
ENSMUSG00000001767	Crnkl1	486.652	-0.39741	0.170044	-2.33709	0.0194342	0.119897
ENSMUSG00000001768	Rin2	226.723	-0.717195	0.340098	-2.10879	0.0349629	0.176833
ENSMUSG00000001773	Folh1	28.7283	-1.59963	0.499873	-3.20008	0.00137387	0.0179749
ENSMUSG00000001774	Chordc1	1666.9	0.410153	0.108993	3.76312	0.000167807	0.00353086
ENSMUSG00000001783	Rtcb	3108.49	-0.152887	0.127061	-1.20326	0.228874	0.53614
ENSMUSG00000001785	Pwp1	1124.68	0.0541685	0.141865	0.381831	0.702587	0.890176
ENSMUSG00000001786	Fbxo7	2289.2	-0.409789	0.13869	-2.95471	0.00312961	0.0328673
ENSMUSG00000001794	Capns1	3964.41	-0.246961	0.121702	-2.02923	0.0424353	0.200358
ENSMUSG00000001802	Lrp3	3441.52	-0.12744	0.0831385	-1.53287	0.125308	0.383336
ENSMUSG00000001804	Dsg4	1.08211	0.68153	2.16628	0.314609	0.753059	NA
ENSMUSG00000001827	Folr1	57.4471	0.0760469	0.463763	0.163978	0.869748	0.961112
ENSMUSG00000001829	Clpb	2129.24	-0.0976767	0.0985551	-0.991087	0.321643	0.633585
ENSMUSG00000001833	Septin7	8203.69	0.140338	0.0716756	1.95797	0.0502338	0.223102
ENSMUSG00000001844	Zdhhc4	598.764	-0.0404778	0.132952	-0.304455	0.760781	0.917513
ENSMUSG00000001847	Rac1	8934.24	0.0571524	0.0757421	0.754566	0.45051	0.737155
ENSMUSG00000001855	Nup214	1098.04	-0.0386199	0.254497	-0.15175	0.879384	0.964188
ENSMUSG00000001864	Aif1l	288.064	-2.13964	0.235271	-9.09435	9.51549e-20	8.95708e-17
ENSMUSG00000001865	Cpa3	0.648071	1.06614	2.88285	0.36982	0.711516	NA
ENSMUSG00000001870	Ltbp1	58.7694	0.0234552	0.361681	0.0648505	0.948293	0.98583
ENSMUSG00000001891	Ugp2	1801.05	-0.33741	0.112877	-2.98918	0.00279725	0.0303389
ENSMUSG00000001901	Kcnh6	68.3013	0.0374063	0.301956	0.12388	0.90141	0.972487
ENSMUSG00000001909	Trmt1	1136.42	-0.210864	0.229041	-0.920639	0.357239	0.666324
ENSMUSG00000001910	Nacc1	3088.59	-0.165642	0.0880251	-1.88176	0.0598689	0.248897
ENSMUSG00000001911	Nfix	9875.07	-0.0815474	0.101509	-0.803348	0.421774	0.716371
ENSMUSG00000001918	Slc1a5	407.971	0.0277224	0.165171	0.16784	0.866709	0.959838
ENSMUSG00000001924	Uba1	14799.5	0.0397376	0.103058	0.385586	0.699803	0.889881
ENSMUSG00000001930	Vwf	10.1244	-0.162588	1.06961	-0.152006	0.879182	0.964188
ENSMUSG00000001942	Siae	592.344	-0.343032	0.138097	-2.48399	0.0129919	0.0906942
ENSMUSG00000001943	Vsig2	87.7241	-0.442642	0.255402	-1.73312	0.0830751	0.302002
ENSMUSG00000001946	Esam	36.0091	5.20853	0.698018	7.46189	8.52891e-14	2.67613e-11
ENSMUSG00000001948	Spa17	34.7965	0.540508	0.394599	1.36976	0.170761	0.454541
ENSMUSG00000001962	Fam50a	926.075	0.0261098	0.136638	0.191088	0.848457	0.9542
ENSMUSG00000001964	Emd	1748.59	-0.0378477	0.112027	-0.337845	0.73548	0.905491
ENSMUSG00000001983	Taco1	471.932	0.165484	0.117655	1.40652	0.159571	0.437473
ENSMUSG00000001985	Grik3	2519.16	-0.144648	0.123554	-1.17073	0.241709	0.551048
ENSMUSG00000001986	Gria3	2350.97	-0.494947	0.198731	-2.49053	0.0127551	0.0897777
ENSMUSG00000001988	Npas1	131.849	-0.408325	0.269366	-1.51587	0.129552	0.390862
ENSMUSG00000001995	Sipa1l2	1747.31	0.0189236	0.104715	0.180715	0.856591	0.956891
ENSMUSG00000001998	Ap4e1	397.24	0.491649	0.267286	1.83942	0.0658541	0.262961
ENSMUSG00000001999	Blvra	255.245	0.0563051	0.209134	0.26923	0.787753	0.929351
ENSMUSG00000002006	Pdzd4	6045.61	0.198644	0.0953739	2.0828	0.0372698	0.184902
ENSMUSG00000002007	Srpk3	3.72756	-0.885779	1.24723	-0.710197	0.477582	NA
ENSMUSG00000002010	Idh3g	2282.66	-0.198709	0.137192	-1.4484	0.147505	0.418763
ENSMUSG00000002012	Pnck	1456.91	-0.200114	0.08666	-2.30919	0.0209333	0.12593
ENSMUSG00000002014	Ssr4	735.609	-0.0952701	0.164776	-0.578181	0.563142	0.816986
ENSMUSG00000002015	Bcap31	1459.67	-0.120482	0.0950346	-1.26777	0.20488	0.504583
ENSMUSG00000002017	Fam98a	1404.12	0.0701843	0.110645	0.634321	0.525871	0.793182
ENSMUSG00000002020	Ltbp2	8.90087	-1.41202	0.974891	-1.44838	0.147509	0.418763
ENSMUSG00000002028	Kmt2a	2735.16	0.0736512	0.244111	0.301712	0.762871	0.91819
ENSMUSG00000002031	Ift46	1013.49	0.0474865	0.113834	0.417154	0.676565	0.877689
ENSMUSG00000002032	Tmem25	611.18	-0.133159	0.122618	-1.08597	0.277493	0.590986
ENSMUSG00000002033	Cd3g	1.16467	2.52709	2.50638	1.00826	0.313329	NA
ENSMUSG00000002043	Trappc6a	242.523	-0.345856	0.14908	-2.31994	0.0203439	0.123603
ENSMUSG00000002052	Supt6	4117.17	-0.103961	0.087238	-1.1917	0.23338	0.541515
ENSMUSG00000002055	Spag5	141.038	0.175448	0.38759	0.452663	0.650791	0.865715
ENSMUSG00000002057	Foxn1	0.636042	2.44898	2.79245	0.877002	0.380486	NA
ENSMUSG00000002058	Unc119	1106.83	-0.507176	0.137275	-3.6946	0.000220235	0.00438631
ENSMUSG00000002059	Rab34	411.128	-0.278977	0.232328	-1.20079	0.229833	0.537047
ENSMUSG00000002064	Sdf2	1084.95	-0.161494	0.174573	-0.925082	0.354923	0.663492
ENSMUSG00000002068	Ccne1	318.234	-0.580409	0.133815	-4.33742	1.44168e-05	0.000470519
ENSMUSG00000002076	Hsf2bp	10.9029	1.00659	0.864951	1.16375	0.244525	0.554283
ENSMUSG00000002083	Bbc3	1528.92	-0.253709	0.166815	-1.5209	0.128285	0.389076
ENSMUSG00000002100	Mybpc3	0.594344	-0.635459	3.02965	-0.209747	0.833865	NA
ENSMUSG00000002102	Psmc3	3181.05	-0.302629	0.109435	-2.76537	0.00568578	0.0509637
ENSMUSG00000002103	Acp2	2438.09	-0.143331	0.180728	-0.793073	0.427735	0.720902
ENSMUSG00000002104	Rapsn	5.49587	1.0377	1.09742	0.945579	0.344364	NA
ENSMUSG00000002105	Slc39a13	442.292	-0.0261461	0.220598	-0.118524	0.905653	0.974004
ENSMUSG00000002107	Celf2	18517.5	0.106489	0.217645	0.489279	0.624644	0.851746
ENSMUSG00000002108	Nr1h3	20.3365	0.233274	0.617785	0.377598	0.705729	0.890988
ENSMUSG00000002109	Ddb2	210.096	0.0162399	0.165799	0.0979497	0.921972	0.979255
ENSMUSG00000002129	Sf3a1	3501.04	0.13478	0.0943437	1.42861	0.153117	0.428023
ENSMUSG00000002147	Stat6	101.007	2.58297	0.555791	4.64737	3.36188e-06	0.000137591
ENSMUSG00000002190	Clgn	469.298	-0.116003	0.144177	-0.804587	0.421058	0.715915
ENSMUSG00000002204	Napsa	7.15511	1.66265	1.09293	1.52129	0.128188	NA
ENSMUSG00000002205	Vrk3	718.945	-0.175185	0.193587	-0.90494	0.365497	0.673116
ENSMUSG00000002210	Smg9	842.832	-0.222342	0.168571	-1.31898	0.187175	0.478165
ENSMUSG00000002221	Paxip1	1178.94	-0.149617	0.137565	-1.08761	0.276767	0.59062
ENSMUSG00000002222	Rmnd5a	4459.34	-0.0122177	0.0859335	-0.142176	0.886941	0.966933
ENSMUSG00000002227	Mov10	118.212	-0.630361	0.261402	-2.41146	0.0158889	0.104245
ENSMUSG00000002228	Ppm1j	26.0834	0.690878	0.701554	0.984783	0.324731	0.636872
ENSMUSG00000002233	Rhoc	338.164	-0.204951	0.173335	-1.1824	0.237048	0.545595
ENSMUSG00000002249	Tead3	93.2439	-0.772609	0.471887	-1.63728	0.101573	0.340066
ENSMUSG00000002250	Ppard	456.131	0.140632	0.141262	0.995536	0.319476	0.631711
ENSMUSG00000002257	Def6	69.7919	0.32735	0.304975	1.07337	0.283107	0.597447
ENSMUSG00000002265	Peg3	5675.13	0.27764	0.159345	1.74238	0.0814422	0.298666
ENSMUSG00000002266	Zim1	523.53	-0.610953	0.217766	-2.80555	0.00502302	0.0463986
ENSMUSG00000002274	Metrn	1461.03	-0.435748	0.136618	-3.18954	0.00142498	0.0184546
ENSMUSG00000002279	Lmf1	410.976	-0.27322	0.16095	-1.69755	0.0895932	0.3163
ENSMUSG00000002280	Ciao3	605.989	-0.0691077	0.693593	-0.0996372	0.920632	0.978517
ENSMUSG00000002289	Angptl4	101.203	-0.787367	0.370823	-2.12329	0.0337292	0.172258
ENSMUSG00000002297	Dbf4	161.667	0.11966	0.244289	0.48983	0.624254	0.851746
ENSMUSG00000002307	Daxx	717.011	-0.0279506	0.111671	-0.250295	0.802359	0.935177
ENSMUSG00000002308	Cd320	253.277	-0.289789	0.177965	-1.62835	0.10345	0.344017
ENSMUSG00000002319	Ipo4	3148.81	-0.125463	0.110559	-1.13481	0.256456	0.568165
ENSMUSG00000002320	Tm9sf1	991.38	-0.185617	0.126341	-1.46917	0.141786	0.41053
ENSMUSG00000002324	Rec8	56.7929	1.48475	0.38483	3.85818	0.000114232	0.0025854
ENSMUSG00000002325	Irf9	177.51	0.0657486	0.184866	0.355656	0.722098	0.898808
ENSMUSG00000002326	Gmpr2	558.457	-0.257324	0.144432	-1.78163	0.0748096	0.284731
ENSMUSG00000002329	Mdp1	1337.56	-0.141755	0.115234	-1.23015	0.21864	0.522989
ENSMUSG00000002332	Dhrs1	1646.5	-0.481859	0.152817	-3.15318	0.00161504	0.0202559
ENSMUSG00000002341	Ncan	24663.5	-0.139059	0.13757	-1.01082	0.312102	0.62414
ENSMUSG00000002342	Tmem161a	1064.74	-0.117962	0.219057	-0.538497	0.590234	0.833493
ENSMUSG00000002343	Armc6	1936	-0.125126	0.122695	-1.01981	0.307816	0.620399
ENSMUSG00000002345	Borcs8	477.373	-0.132917	0.137054	-0.969815	0.332139	0.642791
ENSMUSG00000002346	Slc25a42	614.088	-0.328718	0.110261	-2.98127	0.00287053	0.0309274
ENSMUSG00000002365	Snx9	234.78	-0.0134083	0.181052	-0.0740578	0.940964	0.984839
ENSMUSG00000002372	Ranbp3	2087.4	-0.127247	0.0921532	-1.38082	0.167334	0.448692
ENSMUSG00000002379	Ndufa11	1101.83	-0.460188	0.112482	-4.0912	4.29144e-05	0.00116115
ENSMUSG00000002384	Bmp8b	20.5702	0.691435	0.465286	1.48604	0.137268	0.403325
ENSMUSG00000002393	Nr2f6	797.187	-0.448957	0.284595	-1.57753	0.114674	0.364095
ENSMUSG00000002395	Use1	985.961	-0.247742	0.15448	-1.60372	0.108775	0.354039
ENSMUSG00000002396	Ocel1	354.189	-0.0615974	0.168811	-0.364889	0.715194	0.896119
ENSMUSG00000002409	Dyrk1b	379.362	0.0941842	0.139985	0.672819	0.501063	0.775016
ENSMUSG00000002413	Braf	3143.3	0.590102	0.272147	2.16832	0.0301342	0.159594
ENSMUSG00000002416	Ndufb2	981.576	-0.0860372	0.174638	-0.49266	0.622253	0.850531
ENSMUSG00000002428	Hltf	720.236	0.321848	0.137353	2.34322	0.0191181	0.118601
ENSMUSG00000002455	Prpf6	1634.5	0.31597	0.114189	2.76707	0.00565619	0.0508091
ENSMUSG00000002458	Rgs19	579.632	-0.715417	0.175757	-4.07048	4.6917e-05	0.00124129
ENSMUSG00000002459	Rgs20	584.975	-0.0539166	0.125746	-0.428773	0.668089	0.873403
ENSMUSG00000002475	Abhd3	366.97	-0.621647	0.171747	-3.61955	0.000295115	0.00550953
ENSMUSG00000002477	Snrpd1	806.654	-0.0290076	0.121623	-0.238503	0.811491	0.937818
ENSMUSG00000002486	Tchp	294.628	-0.198137	0.211713	-0.935877	0.349337	0.658296
ENSMUSG00000002489	Tiam1	2290.35	0.394693	0.272406	1.44891	0.147361	0.418675
ENSMUSG00000002496	Tsc2	3380.48	-0.298029	0.241678	-1.23316	0.217515	0.521803
ENSMUSG00000002500	Rpl3l	3.89053	1.56396	1.23208	1.26937	0.204309	NA
ENSMUSG00000002504	Slc9a3r2	1052.87	-0.123333	0.123094	-1.00195	0.316369	0.628486
ENSMUSG00000002524	Puf60	3210	-0.0587668	0.127182	-0.462066	0.644034	0.862862
ENSMUSG00000002546	Golga2	2550.9	0.0858325	0.0847397	1.0129	0.31111	0.6233
ENSMUSG00000002550	Uck1	1621.59	-0.222414	0.0924768	-2.40507	0.0161692	0.105504
ENSMUSG00000002565	Scin	0.911312	-2.52163	2.62904	-0.959144	0.337486	NA
ENSMUSG00000002578	Ikzf4	744.354	-0.864249	0.19545	-4.42183	9.7867e-06	0.00034388
ENSMUSG00000002580	Mien1	1652.02	-0.161151	0.124849	-1.29077	0.196783	0.492921
ENSMUSG00000002602	Axl	835.534	-0.615211	0.267717	-2.29799	0.0215624	0.128377
ENSMUSG00000002603	Tgfb1	13.4453	0.818737	0.677595	1.2083	0.226932	0.533476
ENSMUSG00000002608	Ccdc97	1092.89	-0.148581	0.164497	-0.903247	0.366395	0.674185
ENSMUSG00000002617	Zfp40	850.642	0.110198	0.296684	0.371431	0.710316	0.893516
ENSMUSG00000002625	Akap8l	1264.23	-0.0814554	0.0991909	-0.821199	0.411533	0.708311
ENSMUSG00000002633	Shh	31.8005	0.256655	0.433888	0.591524	0.55417	0.811871
ENSMUSG00000002635	Pdcd2l	449.622	-0.127045	0.196332	-0.647094	0.517571	0.7873
ENSMUSG00000002658	Gtf2f1	1876.95	-0.00552635	0.12497	-0.0442213	0.964728	0.989231
ENSMUSG00000002660	Clpp	1057.91	-0.266993	0.191949	-1.39096	0.164238	0.444486
ENSMUSG00000002661	Alkbh7	288.231	-0.539008	0.148568	-3.62801	0.00028561	0.00536005
ENSMUSG00000002664	Pspn	5.9555	-1.00027	0.850581	-1.17599	0.239601	NA
ENSMUSG00000002668	Dennd1c	13.2354	0.350099	1.07221	0.326521	0.74403	0.909061
ENSMUSG00000002679	Med6	312.351	0.141036	0.169426	0.832436	0.405163	0.701771
ENSMUSG00000002688	Prkd1	343.566	-0.237046	0.136122	-1.74143	0.0816081	0.298968
ENSMUSG00000002699	Lcp2	176.666	0.279299	0.298626	0.935281	0.349644	0.658432
ENSMUSG00000002718	Cse1l	3019.13	0.0882487	0.0980949	0.899626	0.368319	0.674982
ENSMUSG00000002728	Naa20	987.818	0.0140263	0.127819	0.109736	0.912619	0.975757
ENSMUSG00000002731	Prkra	1266.59	-0.251187	0.104454	-2.40476	0.016183	0.105547
ENSMUSG00000002732	Fkbp7	28.887	0.161191	0.437195	0.368694	0.712356	0.894814
ENSMUSG00000002733	Plekha3	670.691	0.0964758	0.111415	0.865912	0.386539	0.688296
ENSMUSG00000002741	Ykt6	5453.81	-0.0135005	0.12305	-0.109716	0.912635	0.975757
ENSMUSG00000002748	Baz1b	2117.32	-0.0767419	0.103209	-0.743558	0.457144	0.741517
ENSMUSG00000002763	Pex6	1558.94	-0.27649	0.111195	-2.48654	0.0128991	0.0903464
ENSMUSG00000002767	Mrpl2	592.09	-0.28523	0.231426	-1.23249	0.217767	0.522117
ENSMUSG00000002768	Mea1	1997.28	-0.259265	0.115684	-2.24115	0.0250163	0.140388
ENSMUSG00000002769	Gnmt	5.59831	0.798741	0.982059	0.813333	0.416027	NA
ENSMUSG00000002771	Grin2d	858.014	-0.496185	0.139565	-3.55522	0.00037767	0.00664407
ENSMUSG00000002778	Kdelr1	2007.38	-0.233367	0.0841892	-2.77193	0.00557249	0.0501832
ENSMUSG00000002781	Tmem143	648.975	-0.18449	0.268757	-0.686457	0.492425	0.768896
ENSMUSG00000002791	Pdxk-ps	3.05475	0.983532	1.36077	0.722777	0.469817	NA
ENSMUSG00000002797	Ggct	327.48	-0.110261	0.194305	-0.567466	0.570397	0.821993
ENSMUSG00000002799	Jag2	1095.68	-0.180913	0.100995	-1.79131	0.0732433	0.280986
ENSMUSG00000002803	Btbd6	883.392	-0.321938	0.137064	-2.34881	0.0188333	0.117323
ENSMUSG00000002804	Nudt14	334.525	-0.234948	0.214961	-1.09298	0.274403	0.588383
ENSMUSG00000002808	Epdr1	1622.1	-0.167781	0.129877	-1.29185	0.19641	0.492323
ENSMUSG00000002812	Flii	1575.73	-0.522887	0.165886	-3.15209	0.00162104	0.020317
ENSMUSG00000002814	Top3a	104.522	0.192434	0.242	0.795181	0.426508	0.7197
ENSMUSG00000002820	Atg4d	469.96	-0.129692	0.128575	-1.00869	0.313125	0.624608
ENSMUSG00000002825	Qtrt1	280.448	-0.492529	0.22543	-2.18485	0.0289002	0.155076
ENSMUSG00000002831	Plin4	6.8071	0.134892	0.958602	0.140718	0.888093	NA
ENSMUSG00000002833	Hdgfl2	1703.13	-0.153955	0.107757	-1.42872	0.153084	0.427998
ENSMUSG00000002835	Chaf1a	268.507	0.341297	0.28339	1.20434	0.22846	0.535506
ENSMUSG00000002844	Adprh	2232.64	-0.154383	0.1526	-1.01168	0.31169	0.623873
ENSMUSG00000002845	Tmem39a	198.802	-0.294384	0.400087	-0.7358	0.461853	0.745428
ENSMUSG00000002846	Timmdc1	507.612	0.00551838	0.125836	0.0438539	0.965021	0.989338
ENSMUSG00000002847	Pla1a	2.14746	-1.83993	1.74472	-1.05457	0.291622	NA
ENSMUSG00000002870	Mcm2	407.407	-0.0437331	0.201138	-0.217429	0.827874	0.945863
ENSMUSG00000002871	Tpra1	420.259	-0.281568	0.258368	-1.08979	0.275804	0.590042
ENSMUSG00000002881	Nab1	1175.4	0.762827	0.190959	3.99472	6.47709e-05	0.00162018
ENSMUSG00000002885	Adgre5	75.9911	1.06805	0.381973	2.79614	0.00517167	0.0474822
ENSMUSG00000002897	Il17ra	117.283	0.421633	0.384164	1.09754	0.272407	0.586352
ENSMUSG00000002900	Lamb1	927.324	-0.409511	0.24872	-1.64647	0.0996664	0.335957
ENSMUSG00000002908	Kcnn1	784.456	0.200206	0.17305	1.15692	0.247303	0.556915
ENSMUSG00000002910	Arrdc2	528.491	-0.38141	0.211789	-1.80089	0.0717199	0.277883
ENSMUSG00000002930	Ppp1r17	4.77526	0.392962	0.989897	0.396972	0.691388	NA
ENSMUSG00000002944	Cd36	219.706	0.314488	0.2234	1.40774	0.159209	0.436994
ENSMUSG00000002948	Map2k7	1173.26	0.12972	0.185521	0.699222	0.484413	0.762998
ENSMUSG00000002949	Timm44	884.98	-0.0534663	0.17062	-0.313364	0.754004	0.913395
ENSMUSG00000002957	Ap2a2	10950.4	-0.0320094	0.0953961	-0.335542	0.737216	0.905951
ENSMUSG00000002963	Pnkp	498.884	-0.280289	0.233419	-1.2008	0.22983	0.537047
ENSMUSG00000002968	Med25	2035.96	-0.08145	0.129153	-0.630645	0.528273	0.79463
ENSMUSG00000002980	Bcam	122.185	-0.274273	0.485808	-0.56457	0.572366	0.823355
ENSMUSG00000002981	Clptm1	5538.13	-0.171278	0.114691	-1.49338	0.135337	0.400068
ENSMUSG00000002983	Relb	161.896	1.01325	0.248995	4.06935	4.71452e-05	0.00124548
ENSMUSG00000002984	Tomm40	1975.65	-0.213971	0.17838	-1.19953	0.230324	0.537451
ENSMUSG00000002985	Apoe	21853.1	-0.961829	0.167635	-5.73764	9.60052e-09	8.716e-07
ENSMUSG00000002996	Hbp1	522.919	-0.349357	0.121371	-2.87843	0.00399663	0.0393178
ENSMUSG00000002997	Prkar2b	7450.13	0.165963	0.0799847	2.07494	0.0379925	0.186829
ENSMUSG00000003031	Cdkn1b	2425.38	0.200905	0.0935867	2.14673	0.031815	0.165362
ENSMUSG00000003032	Klf4	87.0572	0.668077	0.496684	1.34507	0.178602	0.466593
ENSMUSG00000003033	Ap1m1	2900.51	-0.0105402	0.0818231	-0.128816	0.897503	0.970721
ENSMUSG00000003037	Rab8a	1197.5	0.0285125	0.116684	0.244356	0.806955	0.936308
ENSMUSG00000003038	Hmgn2	4719.48	-0.00754094	0.100672	-0.0749063	0.940289	0.98455
ENSMUSG00000003039	Fam32a	2393.33	-0.0484631	0.114623	-0.422804	0.672438	0.875594
ENSMUSG00000003051	Elf3	1.60498	2.62744	1.97521	1.33021	0.18345	NA
ENSMUSG00000003062	Stard3nl	1899.81	-0.131648	0.105281	-1.25044	0.211137	0.512791
ENSMUSG00000003068	Stk11	1810.04	-0.302876	0.0925387	-3.27297	0.00106424	0.0148354
ENSMUSG00000003070	Efna2	446.055	-0.0205064	0.153703	-0.133415	0.893865	0.969426
ENSMUSG00000003072	Atp5d	4301.47	-0.363581	0.140375	-2.59007	0.00959571	0.0743907
ENSMUSG00000003099	Ppp5c	2732.86	-0.239374	0.0873811	-2.73943	0.00615463	0.0540911
ENSMUSG00000003119	Cdk12	776.038	-0.00178633	0.217955	-0.00819585	0.993461	0.99773
ENSMUSG00000003123	Lipe	260.578	-0.619335	0.244322	-2.53492	0.0112474	0.0821825
ENSMUSG00000003131	Pafah1b2	6308.33	-0.290444	0.124363	-2.33545	0.0195199	0.120301
ENSMUSG00000003134	Tbc1d8	506.749	0.265292	0.215691	1.22997	0.21871	0.523084
ENSMUSG00000003135	Cnot11	798.224	-0.1803	0.174525	-1.03309	0.301561	0.614705
ENSMUSG00000003153	Slc2a3	4879.84	-0.617095	0.115357	-5.34944	8.82279e-08	6.04581e-06
ENSMUSG00000003154	Foxj2	1644.18	-0.0396296	0.174621	-0.226947	0.820465	0.941853
ENSMUSG00000003161	Sri	1283.06	-0.349597	0.137687	-2.53907	0.0111147	0.0816704
ENSMUSG00000003166	Dgcr2	5871.19	-0.142632	0.0982197	-1.45217	0.146454	0.417222
ENSMUSG00000003184	Irf3	196.697	-0.293466	0.233328	-1.25774	0.208485	0.509531
ENSMUSG00000003190	Bcl2l12	36.6473	0.0502604	0.411574	0.122117	0.902806	0.972868
ENSMUSG00000003198	Zfp959	145.32	0.292683	0.18481	1.58369	0.113264	0.361737
ENSMUSG00000003199	Mpnd	1622.54	-0.264645	0.109363	-2.41989	0.0155254	0.102689
ENSMUSG00000003200	Sh3gl1	1444.52	-0.285649	0.107411	-2.65941	0.00782788	0.0641326
ENSMUSG00000003206	Ebi3	33.9816	-0.210006	0.374855	-0.560233	0.57532	0.825149
ENSMUSG00000003208	Yju2	213.125	-0.191398	0.211429	-0.905261	0.365327	0.673022
ENSMUSG00000003226	Ranbp2	3043.13	0.391934	0.180437	2.17214	0.0298453	0.158581
ENSMUSG00000003227	Edar	5.83662	-0.245899	0.82778	-0.297058	0.766422	NA
ENSMUSG00000003228	Grk5	423.714	0.386903	0.138426	2.79502	0.00518963	0.0475861
ENSMUSG00000003233	Dvl3	3384.1	-0.114251	0.0908754	-1.25722	0.208672	0.509648
ENSMUSG00000003234	Abcf3	1574.16	0.143464	0.105951	1.35406	0.175718	0.462096
ENSMUSG00000003235	Eif2b5	2461.65	-0.146258	0.0877456	-1.66684	0.0955469	0.328772
ENSMUSG00000003269	Cyth2	2002.23	-0.159787	0.139338	-1.14677	0.251479	0.56204
ENSMUSG00000003271	Sult2b1	175.963	0.267808	0.301253	0.88898	0.374014	0.679413
ENSMUSG00000003273	Car11	1281.31	-0.133426	0.173982	-0.766892	0.443146	0.732298
ENSMUSG00000003279	Dlgap1	6480.66	0.110192	0.157775	0.698411	0.48492	0.76345
ENSMUSG00000003282	Plag1	19.8238	0.703404	0.601153	1.17009	0.241964	0.551277
ENSMUSG00000003283	Hck	93.7387	0.286988	0.270915	1.05933	0.289451	0.60308
ENSMUSG00000003299	Mrpl4	794.019	-0.189799	0.240589	-0.788893	0.430175	0.722275
ENSMUSG00000003308	Keap1	1884.73	-0.0377141	0.202381	-0.186352	0.852169	0.955192
ENSMUSG00000003309	Ap1m2	45.2161	0.77403	0.486725	1.59028	0.111771	0.359999
ENSMUSG00000003316	Glg1	7686.02	0.115546	0.12007	0.962321	0.335888	0.646301
ENSMUSG00000003341	Atp8b3	8.37725	0.836125	0.743434	1.12468	0.260725	0.572717
ENSMUSG00000003344	Btbd2	2693.44	-0.425315	0.0953096	-4.46246	8.10233e-06	0.00029634
ENSMUSG00000003345	Csnk1g2	2919.64	0.0680477	0.107646	0.632144	0.527293	0.793958
ENSMUSG00000003346	Abhd17a	3617.08	-0.366091	0.177271	-2.06515	0.0389092	0.189279
ENSMUSG00000003348	Mob3a	1145.81	-0.467857	0.154259	-3.03292	0.00242196	0.0274182
ENSMUSG00000003352	Cacnb3	3867.76	-0.0943459	0.0955073	-0.98784	0.323231	0.635067
ENSMUSG00000003354	Ccdc65	270.72	0.246357	0.193748	1.27153	0.203539	0.502179
ENSMUSG00000003355	Fkbp11	36.7878	-0.0919815	0.359212	-0.256065	0.797901	0.933113
ENSMUSG00000003360	Ddx23	1771.94	-0.136881	0.20871	-0.655842	0.511926	0.783283
ENSMUSG00000003363	Pld3	8173.83	-0.229273	0.0764553	-2.99879	0.00271057	0.0297597
ENSMUSG00000003378	Grik5	6205.14	-0.147954	0.134194	-1.10254	0.270227	0.584898
ENSMUSG00000003380	Rabac1	2895.75	-0.373107	0.163361	-2.28394	0.0223749	0.131155
ENSMUSG00000003382	Etv3	505.95	0.239696	0.11363	2.10945	0.0349056	0.176697
ENSMUSG00000003402	Prkcsh	2567.04	-0.157315	0.0987354	-1.59329	0.111094	0.358585
ENSMUSG00000003410	Elavl3	13542.6	-0.324578	0.0770533	-4.21238	2.52693e-05	0.000753237
ENSMUSG00000003411	Rab3b	2869.65	-0.183551	0.109535	-1.67573	0.0937919	0.325154
ENSMUSG00000003418	St8sia6	35.3842	0.0843195	0.5584	0.151002	0.879974	0.964418
ENSMUSG00000003420	Fcgrt	162.464	-2.90842	0.299421	-9.71349	2.64144e-22	3.63401e-19
ENSMUSG00000003421	Nosip	1009.28	-0.261828	0.183471	-1.42708	0.153558	0.428397
ENSMUSG00000003423	Pih1d1	1027.52	-0.0528432	0.183787	-0.287524	0.773711	0.923528
ENSMUSG00000003429	Rps11	3583.74	-0.174983	0.0973651	-1.79719	0.0723062	0.278955
ENSMUSG00000003435	Supt5	3846.54	-0.392471	0.149778	-2.62034	0.00878412	0.0699724
ENSMUSG00000003436	Dll3	81.1068	-0.367054	0.267319	-1.37309	0.169724	0.452723
ENSMUSG00000003437	Paf1	1216.6	-0.000376376	0.154385	-0.00243791	0.998055	0.99906
ENSMUSG00000003438	Timm50	963.328	-0.235175	0.219525	-1.07129	0.284039	0.598004
ENSMUSG00000003444	Med29	414.974	-0.176847	0.181998	-0.971697	0.331201	0.642257
ENSMUSG00000003452	Bicd1	1689.13	0.549902	0.213479	2.57591	0.00999764	0.0765117
ENSMUSG00000003458	Ncstn	2420.55	-0.0161667	0.090948	-0.177758	0.858913	0.957769
ENSMUSG00000003464	Pex19	3252.84	-0.180348	0.0778075	-2.31788	0.0204561	0.123851
ENSMUSG00000003469	Phyhip	3867.24	-0.150872	0.140769	-1.07177	0.283825	0.597694
ENSMUSG00000003476	Crhr2	88.7092	-0.0501543	0.246892	-0.203143	0.839023	0.950404
ENSMUSG00000003484	Cyp4f18	0.768376	-0.481763	2.85135	-0.16896	0.865828	NA
ENSMUSG00000003500	Impdh1	3574.27	-0.060769	0.0933123	-0.651242	0.51489	0.785916
ENSMUSG00000003518	Dusp3	2454.05	0.167836	0.142338	1.17914	0.238344	0.54665
ENSMUSG00000003526	Prodh	126.486	-1.49908	0.343177	-4.36825	1.25246e-05	0.000419817
ENSMUSG00000003527	Ess2	758.747	-0.0527424	0.130147	-0.405252	0.685292	0.881696
ENSMUSG00000003528	Slc25a1	4510.09	-0.229569	0.106188	-2.16191	0.0306254	0.161194
ENSMUSG00000003531	Dgcr6	1400.6	-0.373642	0.128972	-2.89708	0.00376649	0.0376966
ENSMUSG00000003534	Ddr1	1992.08	-0.232921	0.128737	-1.80928	0.0704071	0.274708
ENSMUSG00000003541	Ier3	133.901	0.395317	0.231658	1.70647	0.0879209	0.31268
ENSMUSG00000003545	Fosb	212.161	0.589033	0.267789	2.19962	0.0278342	0.150899
ENSMUSG00000003546	Klc4	427.3	-0.421631	0.134412	-3.13686	0.00170766	0.0210341
ENSMUSG00000003549	Ercc1	328.187	-0.179809	0.185309	-0.970319	0.331888	0.642627
ENSMUSG00000003555	Cyp17a1	1.20457	1.64028	1.9593	0.837174	0.402495	NA
ENSMUSG00000003559	As3mt	46.3803	3.28544	0.461166	7.1242	1.04688e-12	2.58028e-10
ENSMUSG00000003573	Homer3	249.697	-0.266907	0.2336	-1.14258	0.253214	0.56461
ENSMUSG00000003575	Crtc1	4189.9	-0.144812	0.218165	-0.663771	0.506837	0.779425
ENSMUSG00000003581	Rnf215	889.356	-0.438848	0.141776	-3.09537	0.00196571	0.0235476
ENSMUSG00000003585	Sec14l2	244.868	-0.489645	0.202644	-2.41628	0.0156799	0.103307
ENSMUSG00000003604	Aven	206.462	-0.308429	0.183527	-1.68057	0.0928472	0.32296
ENSMUSG00000003617	Cp	72.664	0.575395	0.47751	1.20499	0.228207	0.534997
ENSMUSG00000003623	Crot	1389.35	-0.546159	0.165794	-3.29421	0.000986998	0.0140433
ENSMUSG00000003644	Rps6ka1	358.462	-0.855382	0.312684	-2.73561	0.00622648	0.0544901
ENSMUSG00000003657	Calb2	1372.73	-0.633612	0.0932394	-6.79554	1.07906e-11	2.03147e-09
ENSMUSG00000003660	Snrnp200	4707.08	-0.0551938	0.120712	-0.457235	0.647502	0.864632
ENSMUSG00000003662	Ciao1	1074.43	-0.0561137	0.154463	-0.363284	0.716393	0.89618
ENSMUSG00000003665	Has1	3.47532	-0.106071	1.10683	-0.0958331	0.923653	NA
ENSMUSG00000003680	Taf6l	426.234	-0.618891	0.232238	-2.6649	0.00770123	0.0634438
ENSMUSG00000003721	Insig2	706.418	0.500309	0.217402	2.30131	0.0213739	0.127722
ENSMUSG00000003731	Kpna6	4157.4	0.201059	0.172952	1.16251	0.245028	0.554402
ENSMUSG00000003746	Man1a	568.913	0.794252	0.129703	6.12362	9.14712e-10	1.04869e-07
ENSMUSG00000003752	Itpkc	310.334	-0.191631	0.29507	-0.649441	0.516053	0.786317
ENSMUSG00000003762	Coq8b	538.425	0.299585	0.185256	1.61714	0.105848	0.34855
ENSMUSG00000003778	Brd8	1228.24	0.189911	0.14355	1.32296	0.18585	0.476829
ENSMUSG00000003779	Kif20a	98.1116	1.49197	0.341074	4.37433	1.21809e-05	0.000411824
ENSMUSG00000003808	Farsa	1358.89	-0.0794341	0.12637	-0.628583	0.529622	0.795673
ENSMUSG00000003809	Gcdh	495.167	-0.0384231	0.141881	-0.270812	0.786536	0.929094
ENSMUSG00000003810	Mast2	4259.97	0.260986	0.167304	1.55995	0.118772	0.371825
ENSMUSG00000003812	Dnase2a	156.492	-0.519507	0.263807	-1.96927	0.0489223	0.219457
ENSMUSG00000003813	Rad23a	1243.15	-0.125569	0.15003	-0.836963	0.402613	0.699801
ENSMUSG00000003814	Calr	8799.62	0.0170046	0.0933188	0.182221	0.85541	0.956726
ENSMUSG00000003824	Syce2	315.121	0.086028	0.140789	0.61104	0.541173	0.802627
ENSMUSG00000003847	Nfat5	999.895	-0.21636	0.716865	-0.301814	0.762794	0.91819
ENSMUSG00000003848	Nob1	688.496	0.0151518	0.173859	0.0871496	0.930553	0.982232
ENSMUSG00000003849	Nqo1	33.3905	0.602273	0.380597	1.58245	0.113548	0.362255
ENSMUSG00000003863	Ppfia3	5102.54	-0.137861	0.120222	-1.14672	0.251496	0.56204
ENSMUSG00000003865	Gys1	1749.31	-0.672907	0.176693	-3.80833	0.000139908	0.00306776
ENSMUSG00000003868	Ruvbl2	1285.87	-0.281863	0.242329	-1.16314	0.244772	0.554285
ENSMUSG00000003872	Lin7b	985.988	-0.292607	0.141448	-2.06866	0.0385778	0.188525
ENSMUSG00000003873	Bax	1483.52	-0.442302	0.155023	-2.85314	0.00432898	0.0417154
ENSMUSG00000003882	Il7r	1.25081	0.978852	2.19278	0.446398	0.65531	NA
ENSMUSG00000003923	Tfam	942.266	-0.107979	0.142573	-0.757359	0.448835	0.735919
ENSMUSG00000003929	Zfp81	1278.62	0.215548	0.160834	1.34019	0.180184	0.468468
ENSMUSG00000003934	Efnb3	9337.35	-0.666471	0.0940864	-7.0836	1.40453e-12	3.34933e-10
ENSMUSG00000003948	Mmd	4668.69	0.140426	0.0954163	1.47172	0.141096	0.410059
ENSMUSG00000003949	Hlf	431.842	-0.96848	0.33307	-2.90774	0.00364052	0.036765
ENSMUSG00000003955	Fam162a	1094.66	-0.436152	0.189055	-2.30701	0.0210544	0.126362
ENSMUSG00000003970	Rpl8	6223.28	-0.259521	0.121335	-2.13889	0.0324447	0.16736
ENSMUSG00000003974	Grm3	1430.67	-0.0473024	0.152005	-0.31119	0.755656	0.914282
ENSMUSG00000003992	Ssbp2	4752.73	-0.10524	0.101929	-1.03248	0.301848	0.61501
ENSMUSG00000004018	Fancl	269.756	-0.28735	0.222472	-1.29162	0.196489	0.492323
ENSMUSG00000004031	Brinp2	3456.89	-0.468425	0.105045	-4.4593	8.22295e-06	0.00029916
ENSMUSG00000004032	Gstm5	1873.59	-0.222301	0.114863	-1.93536	0.0529457	0.230903
ENSMUSG00000004035	Gstm7	478.255	1.6196	0.184624	8.77246	1.74807e-18	1.25057e-15
ENSMUSG00000004040	Stat3	1942.61	-0.0106893	0.101577	-0.105233	0.916191	0.977173
ENSMUSG00000004043	Stat5a	7.14426	1.08867	0.920506	1.18269	0.236933	NA
ENSMUSG00000004044	Cavin1	143.496	0.744664	0.216771	3.43526	0.000591993	0.00944496
ENSMUSG00000004054	Map3k11	269.913	0.00154878	0.16939	0.00914329	0.992705	0.997675
ENSMUSG00000004056	Akt2	2170.55	0.227611	0.167262	1.36081	0.173575	0.458956
ENSMUSG00000004069	Dnaja3	2461.61	0.103602	0.0842599	1.22956	0.218863	0.523127
ENSMUSG00000004070	Hmox2	1373.37	-0.263003	0.134106	-1.96115	0.0498611	0.221998
ENSMUSG00000004071	Cdip1	3696.97	-0.0557536	0.083091	-0.670995	0.502224	0.776073
ENSMUSG00000004085	Map3k20	415.428	0.426309	0.161595	2.63812	0.00833659	0.0673516
ENSMUSG00000004096	Cwc15	1137.67	0.0422243	0.130121	0.324499	0.74556	0.909436
ENSMUSG00000004098	Col5a3	108.892	1.86654	0.259376	7.19627	6.18839e-13	1.65193e-10
ENSMUSG00000004099	Dnmt1	2335.14	-0.207726	0.150976	-1.37589	0.168856	0.451284
ENSMUSG00000004100	Ppan	434.337	-0.23685	0.17819	-1.32919	0.183784	0.473355
ENSMUSG00000004105	Angptl2	103.132	0.194534	0.250763	0.775767	0.437886	0.728531
ENSMUSG00000004110	Cacna1e	7119.57	0.170198	0.269418	0.631722	0.527568	0.794108
ENSMUSG00000004113	Cacna1b	6632.08	-0.176816	0.17252	-1.0249	0.305412	0.617954
ENSMUSG00000004127	Trmt10a	226.316	0.185659	0.25819	0.719079	0.472092	0.752528
ENSMUSG00000004151	Etv1	1523.57	-0.388212	0.202425	-1.9178	0.0551362	0.236687
ENSMUSG00000004187	Kifc2	6270.74	-0.220148	0.102459	-2.14864	0.0316631	0.16486
ENSMUSG00000004207	Psap	39778.2	-0.168949	0.105456	-1.60208	0.109139	0.354771
ENSMUSG00000004221	Ikbkg	1441.59	0.0832149	0.164278	0.50655	0.61247	0.845871
ENSMUSG00000004231	Pax2	6.95923	-0.330016	0.823537	-0.40073	0.688619	NA
ENSMUSG00000004233	Wars2	325.062	0.34244	0.247362	1.38437	0.166246	0.447374
ENSMUSG00000004263	Atn1	6186.2	-0.218122	0.13239	-1.64757	0.0994407	0.335692
ENSMUSG00000004264	Phb2	2472.9	-0.299683	0.110145	-2.7208	0.00651242	0.0560244
ENSMUSG00000004266	Ptpn6	15.8696	-3.66519	1.60397	-2.28507	0.0223084	0.130944
ENSMUSG00000004267	Eno2	5853.04	-0.246582	0.121411	-2.03097	0.0422579	0.199837
ENSMUSG00000004268	Emg1	685.528	0.000273791	0.131818	0.00207704	0.998343	0.999265
ENSMUSG00000004270	Lpcat3	773.941	-0.241138	0.155785	-1.54788	0.121651	0.377057
ENSMUSG00000004285	Atp6v1f	2184.27	-0.21476	0.126316	-1.70018	0.0890974	0.315421
ENSMUSG00000004296	Il12b	0.40211	1.77658	3.29553	0.539087	0.589827	NA
ENSMUSG00000004317	Clcn5	1230.27	0.78961	0.160537	4.91855	8.71886e-07	4.31958e-05
ENSMUSG00000004319	Clcn3	7423.13	0.0802231	0.119255	0.672705	0.501135	0.77506
ENSMUSG00000004328	Hif3a	331.401	0.325993	0.26314	1.23886	0.215397	0.519119
ENSMUSG00000004341	Gpx6	5.7082	2.64235	1.15186	2.29399	0.0217909	NA
ENSMUSG00000004347	Pde1c	109.851	0.584956	0.258377	2.26396	0.0235764	0.135062
ENSMUSG00000004356	Utp20	656.753	0.316158	0.178946	1.76678	0.0772657	0.289605
ENSMUSG00000004359	Spic	1.36893	-1.02989	2.5141	-0.409646	0.682065	NA
ENSMUSG00000004360	9330159F19Rik	2502.5	0.055531	0.155149	0.357921	0.720402	0.89832
ENSMUSG00000004364	Cul3	4105.26	0.172564	0.0968005	1.78267	0.0746396	0.284573
ENSMUSG00000004366	Sst	1845.77	-0.583743	0.0887272	-6.57908	4.73371e-11	7.50009e-09
ENSMUSG00000004371	Il11	12.0151	-1.04356	0.687693	-1.51748	0.129146	0.390163
ENSMUSG00000004383	Large1	6199.84	-0.126394	0.0848832	-1.48904	0.136478	0.401753
ENSMUSG00000004393	Ddx56	1135.69	-0.0338552	0.118493	-0.285715	0.775097	0.923528
ENSMUSG00000004394	Tmed4	1382.84	-0.148631	0.14203	-1.04648	0.295339	0.609104
ENSMUSG00000004415	Col26a1	1408.04	0.139921	0.137303	1.01907	0.30817	0.620399
ENSMUSG00000004446	Bid	694.956	-0.327687	0.157128	-2.08547	0.0370266	0.184053
ENSMUSG00000004451	Ralb	1114.92	-0.120399	0.109089	-1.10367	0.269735	0.584481
ENSMUSG00000004455	Ppp1cc	2131.89	0.0992225	0.135638	0.731525	0.464459	0.747556
ENSMUSG00000004460	Dnajb11	1623.44	-0.0221771	0.104598	-0.212023	0.832089	0.947501
ENSMUSG00000004462	Tbccd1	351.898	-0.0868107	0.28287	-0.306893	0.758925	0.916248
ENSMUSG00000004473	Clec11a	64.4963	0.0420446	0.263376	0.159637	0.873167	0.961916
ENSMUSG00000004500	Zfp324	594.941	-0.330165	0.274253	-1.20387	0.22864	0.535801
ENSMUSG00000004508	Gab2	1892.51	0.155101	0.129303	1.19952	0.230326	0.537451
ENSMUSG00000004530	Coro1c	4038.45	-0.0812743	0.12325	-0.659428	0.509621	0.78133
ENSMUSG00000004535	Tax1bp1	4237.24	0.0898815	0.0996705	0.901787	0.36717	0.674594
ENSMUSG00000004558	Ndrg2	7580.03	-0.751268	0.127575	-5.88885	3.88899e-09	3.75971e-07
ENSMUSG00000004561	Mettl17	461.896	-0.581779	0.338934	-1.7165	0.0860714	0.308637
ENSMUSG00000004562	Arhgef40	591.161	-0.0783439	0.274861	-0.285031	0.77562	0.923567
ENSMUSG00000004565	Pnpla6	1756.28	-0.303567	0.161341	-1.88152	0.0599012	0.248972
ENSMUSG00000004567	Mcoln1	1601.59	0.0485989	0.0968727	0.501678	0.615894	0.847458
ENSMUSG00000004568	Arhgef18	1385.03	0.0118148	0.12684	0.0931478	0.925786	0.980383
ENSMUSG00000004591	Pkn2	666.204	0.0714097	0.161575	0.44196	0.658518	0.869037
ENSMUSG00000004609	Cd33	1.02102	1.90489	2.17382	0.876286	0.380875	NA
ENSMUSG00000004610	Etfb	654.94	-0.477859	0.132498	-3.60653	0.000310318	0.00575133
ENSMUSG00000004626	Stxbp2	710.998	0.306591	0.1583	1.93677	0.0527733	0.230396
ENSMUSG00000004630	Pcp2	2.04434	0.661229	1.59098	0.415611	0.677695	NA
ENSMUSG00000004631	Sgce	530.858	-0.180505	0.160644	-1.12363	0.261169	0.573306
ENSMUSG00000004633	Chn2	1227.66	0.0379791	0.127805	0.297164	0.766341	0.92082
ENSMUSG00000004637	Wwox	391.494	-0.434351	0.152013	-2.85734	0.00427211	0.0413456
ENSMUSG00000004642	Slbp	1160.7	-0.192796	0.106708	-1.80676	0.0707999	0.275393
ENSMUSG00000004651	Tyr	5.70857	0.199097	0.964296	0.206469	0.836425	NA
ENSMUSG00000004654	Ghrhr	0.694354	2.56232	2.80172	0.914553	0.360426	NA
ENSMUSG00000004655	Aqp1	10.7042	0.697095	0.65651	1.06182	0.288318	0.602021
ENSMUSG00000004661	Arid3b	74.1607	-0.157993	0.489588	-0.322706	0.746918	0.910112
ENSMUSG00000004665	Cnn2	36.8235	-1.28911	0.482858	-2.66975	0.00759079	0.0626784
ENSMUSG00000004667	Polr2e	1216.91	-0.286785	0.175427	-1.63479	0.102094	0.341134
ENSMUSG00000004668	Abca13	14.7671	1.38402	0.596109	2.32176	0.0202459	0.123288
ENSMUSG00000004677	Myo9b	927.053	0.411489	0.144693	2.84388	0.00445678	0.0426254
ENSMUSG00000004698	Hdac9	4643.78	0.650043	0.127322	5.10551	3.29905e-07	1.88429e-05
ENSMUSG00000004709	Cd244a	0.69156	1.30031	2.94714	0.44121	0.659061	NA
ENSMUSG00000004730	Adgre1	10.3196	0.758526	0.684356	1.10838	0.267698	0.581747
ENSMUSG00000004748	Mtfp1	569.125	-0.42208	0.146089	-2.8892	0.00386226	0.0383246
ENSMUSG00000004768	Rab23	1241.64	-0.0773658	0.153239	-0.504871	0.61365	0.846373
ENSMUSG00000004771	Rab11a	5446.39	-0.0880931	0.106371	-0.82817	0.407574	0.704296
ENSMUSG00000004788	Eif2b2	752.537	0.00341532	0.205029	0.0166577	0.98671	0.99556
ENSMUSG00000004789	Dlst	4426.22	-0.111136	0.0797503	-1.39354	0.163455	0.443544
ENSMUSG00000004791	Pgf	48.1447	-0.228764	0.321484	-0.711587	0.476721	0.757005
ENSMUSG00000004798	Ulk2	5919.6	-0.222247	0.10566	-2.10341	0.0354296	0.178445
ENSMUSG00000004814	Ccl24	2.51832	-0.0682322	1.25333	-0.0544408	0.956584	NA
ENSMUSG00000004815	Dgkq	862.174	0.200284	0.135425	1.47893	0.13916	0.406946
ENSMUSG00000004837	Grap	3.3534	-0.150813	1.23287	-0.122327	0.90264	NA
ENSMUSG00000004842	Pou1f1	1.11494	-0.313659	2.14999	-0.145889	0.884009	NA
ENSMUSG00000004843	Chmp2b	2751.14	-0.0888009	0.0824308	-1.07728	0.281356	0.595619
ENSMUSG00000004846	Plod3	860.504	-0.163108	0.132436	-1.2316	0.2181	0.52234
ENSMUSG00000004849	Ap1s1	3935.8	0.0269588	0.120496	0.223732	0.822966	0.943025
ENSMUSG00000004864	Mapk13	15.2143	0.942311	0.635592	1.48257	0.138188	0.405006
ENSMUSG00000004865	Srpk1	1851.59	-0.000982593	0.129627	-0.00758017	0.993952	0.99773
ENSMUSG00000004880	Lbr	440.116	0.196117	0.323512	0.606213	0.544373	0.805173
ENSMUSG00000004885	Crabp2	1.36941	1.38278	1.96354	0.704227	0.481291	NA
ENSMUSG00000004891	Nes	1547.74	1.56838	0.17626	8.89815	5.67835e-19	4.61624e-16
ENSMUSG00000004892	Bcan	4607.85	-0.53402	0.111503	-4.78928	1.67384e-06	7.57482e-05
ENSMUSG00000004894	Hapln2	11.4719	-0.576296	0.659586	-0.873724	0.382269	0.685265
ENSMUSG00000004895	Prcc	1427.38	-0.122474	0.116581	-1.05055	0.293466	0.607151
ENSMUSG00000004896	Rrnad1	291.468	0.0242116	0.261738	0.0925031	0.926298	0.980577
ENSMUSG00000004897	Hdgf	3831.87	-0.0122848	0.149706	-0.0820597	0.934599	0.983791
ENSMUSG00000004902	Slc25a18	220.738	-0.17322	0.176034	-0.984014	0.325109	0.637141
ENSMUSG00000004929	Thop1	1849.38	0.0246848	0.106812	0.231105	0.817233	0.940797
ENSMUSG00000004931	Apba3	472.313	-0.513531	0.229436	-2.23823	0.0252062	0.141055
ENSMUSG00000004933	Matk	2156.93	-0.16946	0.110561	-1.53273	0.125343	0.383336
ENSMUSG00000004934	Pias4	635.989	-0.498817	0.229349	-2.17493	0.0296357	0.157843
ENSMUSG00000004936	Map2k1	5891.16	0.0301606	0.0897952	0.335882	0.73696	0.905878
ENSMUSG00000004937	Sgta	4261.95	-0.255453	0.0930143	-2.74638	0.0060256	0.0533241
ENSMUSG00000004939	Nmrk2	2.5008	-0.786351	1.72176	-0.456713	0.647877	NA
ENSMUSG00000004945	Tmem242	1026.96	-0.201507	0.144886	-1.3908	0.164287	0.444486
ENSMUSG00000004947	Dtx2	292.609	-0.20239	0.23523	-0.860393	0.389572	0.689988
ENSMUSG00000004948	Zp3	0.954683	0.543784	2.02433	0.268624	0.788219	NA
ENSMUSG00000004951	Hspb1	2.61677	0.754885	1.38803	0.543852	0.586543	NA
ENSMUSG00000004952	Rasa4	122.661	-0.682282	0.282881	-2.41191	0.0158694	0.104194
ENSMUSG00000004961	Syt5	5882.13	-0.206027	0.0945709	-2.17854	0.0293658	0.157151
ENSMUSG00000004980	Hnrnpa2b1	10303.4	0.0196656	0.104616	0.18798	0.850893	0.954842
ENSMUSG00000004988	Fxyd4	1.36392	0.273436	2.14564	0.127438	0.898594	NA
ENSMUSG00000004994	Ccdc130	345.226	0.065713	0.202408	0.324657	0.745441	0.909428
ENSMUSG00000004996	Mri1	170.328	-0.289958	0.272217	-1.06517	0.286798	0.600681
ENSMUSG00000005034	Prkacb	15762	0.13755	0.14843	0.926698	0.354083	0.662738
ENSMUSG00000005043	Sgsh	372.828	-0.106681	0.292029	-0.365308	0.714881	0.896092
ENSMUSG00000005045	Chd5	8584.89	0.0609025	0.136484	0.446223	0.655436	0.867932
ENSMUSG00000005054	Cstb	425.821	-0.023241	0.186588	-0.124558	0.900874	0.97225
ENSMUSG00000005057	Sh2b2	517.335	-0.827987	0.626916	-1.32073	0.186591	0.477509
ENSMUSG00000005069	Pex5	2859.84	-0.100416	0.109762	-0.914848	0.360271	0.668477
ENSMUSG00000005078	Jkamp	1627.37	0.0104518	0.109135	0.0957701	0.923703	0.979805
ENSMUSG00000005087	Cd44	754.534	0.3438	0.148911	2.30876	0.0209571	0.12599
ENSMUSG00000005089	Slc1a2	23205	-0.36086	0.25053	-1.44039	0.149757	0.422728
ENSMUSG00000005102	Eif2ak4	666.611	-0.042252	0.174636	-0.241943	0.808824	0.937186
ENSMUSG00000005103	Wdr1	7257.84	-0.118834	0.119104	-0.99773	0.31841	0.63053
ENSMUSG00000005107	Slc2a9	40.3696	2.03832	0.581277	3.50662	0.00045384	0.00765026
ENSMUSG00000005124	Ccn4	40.0695	1.44233	0.486654	2.96378	0.00303887	0.0322362
ENSMUSG00000005125	Ndrg1	4483.17	-0.421185	0.0956063	-4.40541	1.05582e-05	0.000365957
ENSMUSG00000005131	4930550C14Rik	11.7917	0.138133	0.652498	0.211699	0.832342	0.9476
ENSMUSG00000005142	Man2b1	951.278	0.0986106	0.103127	0.956207	0.338968	0.649159
ENSMUSG00000005148	Klf5	569.846	0.362501	0.109998	3.29551	0.000982442	0.0139896
ENSMUSG00000005150	Wdr83	388.864	-0.479385	0.216201	-2.21731	0.0266021	0.146131
ENSMUSG00000005161	Prdx2	8139.94	-0.183771	0.119569	-1.53694	0.124307	0.381416
ENSMUSG00000005198	Polr2a	3033.21	0.222844	0.144989	1.53697	0.1243	0.381416
ENSMUSG00000005204	Senp3	1882.68	-0.415053	0.137867	-3.01053	0.00260791	0.0288808
ENSMUSG00000005220	Corin	3.32157	0.567327	1.15569	0.4909	0.623497	NA
ENSMUSG00000005225	Plekha8	418.188	-0.186763	0.196732	-0.949327	0.342454	0.651843
ENSMUSG00000005233	Spc25	142.6	0.773433	0.289398	2.67256	0.00752753	0.0622998
ENSMUSG00000005237	Dnah2	144.386	1.21956	0.300493	4.05852	4.93848e-05	0.00129698
ENSMUSG00000005251	Ripk4	18.9038	0.190334	0.51632	0.368636	0.712399	0.894814
ENSMUSG00000005262	Ufd1	1864.02	-0.0225127	0.21093	-0.106731	0.915003	0.976713
ENSMUSG00000005267	Zfp287	472.556	0.202225	0.121419	1.66551	0.0958104	0.329176
ENSMUSG00000005268	Prlr	38.5275	1.1272	0.409347	2.75364	0.00589358	0.0524411
ENSMUSG00000005299	Letm1	2458.51	-0.141623	0.0834535	-1.69703	0.0896905	0.316367
ENSMUSG00000005312	Ubqln1	6325.09	-0.0785356	0.108693	-0.722542	0.469961	0.750938
ENSMUSG00000005320	Fgfr4	0.884776	0.216689	2.71748	0.079739	0.936445	NA
ENSMUSG00000005338	Cadm3	25847.7	-0.228832	0.106879	-2.14104	0.0322706	0.166761
ENSMUSG00000005354	Txn2	2227.79	-0.0939455	0.213003	-0.441052	0.659175	0.869037
ENSMUSG00000005355	Casp14	1.00894	1.81154	2.15738	0.839698	0.401078	NA
ENSMUSG00000005357	Slc1a6	504.414	-0.338383	0.128284	-2.63776	0.00834564	0.0673632
ENSMUSG00000005360	Slc1a3	17856.1	-0.651802	0.125722	-5.18449	2.16607e-07	1.34049e-05
ENSMUSG00000005362	Crbn	1256.21	-0.0337109	0.116945	-0.288263	0.773145	0.923528
ENSMUSG00000005364	Il5ra	2.24714	-0.600483	1.66768	-0.360071	0.718794	NA
ENSMUSG00000005370	Msh6	765.724	0.0179158	0.127836	0.140146	0.888545	0.967385
ENSMUSG00000005371	Fbxo11	3586.65	0.113792	0.100291	1.13461	0.256537	0.568185
ENSMUSG00000005373	Mlxipl	43.9589	2.73481	0.399376	6.8477	7.50489e-12	1.49139e-09
ENSMUSG00000005374	Tbl2	1324.12	-0.299822	0.126183	-2.37609	0.0174971	0.111723
ENSMUSG00000005378	Bud23	486.879	-0.500174	0.184761	-2.70714	0.00678656	0.0575795
ENSMUSG00000005397	Nid1	34.5849	0.447083	0.388405	1.15107	0.249701	0.560129
ENSMUSG00000005410	Mcm5	160.816	1.0008	0.30312	3.30166	0.00096116	0.0137854
ENSMUSG00000005413	Hmox1	1551.73	0.463711	0.171022	2.71142	0.00669965	0.0571143
ENSMUSG00000005417	Mprip	7784.05	-0.130813	0.119489	-1.09477	0.273617	0.58745
ENSMUSG00000005442	Cic	8741.36	-0.334257	0.180358	-1.8533	0.0638389	0.258316
ENSMUSG00000005447	Pafah1b3	1259	-0.453436	0.119077	-3.80793	0.000140138	0.00306776
ENSMUSG00000005465	Il27ra	18.0366	0.62447	0.536	1.16506	0.243996	0.554136
ENSMUSG00000005469	Prkaca	5617.16	0.0248096	0.0792254	0.313152	0.754165	0.913401
ENSMUSG00000005470	Asf1b	33.8981	0.5861	0.738164	0.793998	0.427197	0.720386
ENSMUSG00000005481	Ddx39a	497.93	0.220698	0.183659	1.20167	0.22949	0.536736
ENSMUSG00000005483	Dnajb1	1147.35	-0.307054	0.102474	-2.99642	0.00273173	0.0298454
ENSMUSG00000005493	Msh4	9.1241	0.605154	0.740865	0.816821	0.414031	0.710374
ENSMUSG00000005501	Usp40	357.273	0.30706	0.13494	2.27553	0.0228742	0.133033
ENSMUSG00000005505	Kbtbd4	646.262	-0.359116	0.138504	-2.59282	0.00951938	0.0739913
ENSMUSG00000005506	Celf1	5525.67	0.293341	0.196342	1.49403	0.135167	0.399844
ENSMUSG00000005510	Ndufs3	1699.84	-0.329687	0.116798	-2.82271	0.00476204	0.0446379
ENSMUSG00000005514	Por	3054.67	-0.0559139	0.0891743	-0.627018	0.530648	0.795891
ENSMUSG00000005533	Igf1r	1931.05	0.107647	0.222705	0.483364	0.628838	0.854398
ENSMUSG00000005534	Insr	1800.01	-0.075199	0.310791	-0.24196	0.808811	0.937186
ENSMUSG00000005540	Fcer2a	23.8568	0.188022	0.439023	0.428274	0.668452	0.873562
ENSMUSG00000005547	Cyp2a5	0.981529	-0.024318	2.44266	-0.00995554	0.992057	NA
ENSMUSG00000005553	Atp4a	89.442	1.01291	0.336526	3.00989	0.00261345	0.0289243
ENSMUSG00000005566	Trim28	5276.68	-0.326966	0.0759996	-4.3022	1.69107e-05	0.000542021
ENSMUSG00000005575	Ube2m	2890.69	-0.262067	0.107471	-2.43849	0.0147489	0.0990184
ENSMUSG00000005580	Adcy9	579.849	-0.485702	0.148249	-3.27626	0.00105192	0.0147096
ENSMUSG00000005583	Mef2c	24330.2	0.268187	0.195512	1.37171	0.170153	0.453395
ENSMUSG00000005609	Ctr9	2397.53	0.145898	0.196347	0.743064	0.457443	0.741692
ENSMUSG00000005610	Eif4g2	43151.9	0.240104	0.0996692	2.40901	0.0159959	0.104759
ENSMUSG00000005611	Irag1	1.97356	2.00107	2.49112	0.803283	0.421811	NA
ENSMUSG00000005615	Pcyt1a	1723.03	0.0308192	0.111321	0.27685	0.781895	0.927094
ENSMUSG00000005621	Zfp592	1020.41	0.0284702	0.264219	0.107752	0.914192	0.976359
ENSMUSG00000005625	Psmd4	2540.23	-0.193317	0.142023	-1.36117	0.17346	0.458789
ENSMUSG00000005628	Tmod4	2.11612	-0.220533	1.39763	-0.15779	0.874622	NA
ENSMUSG00000005640	Insrr	4.2427	0.880052	1.1054	0.79614	0.425951	NA
ENSMUSG00000005649	Cabp5	1.1762	-0.985849	2.22206	-0.443664	0.657285	NA
ENSMUSG00000005656	Snx6	1822.38	0.0477555	0.116662	0.409349	0.682284	0.879914
ENSMUSG00000005667	Mthfd2	2718.1	-0.0156354	0.125731	-0.124356	0.901034	0.972364
ENSMUSG00000005672	Kit	1498.11	0.315184	0.183152	1.72089	0.0852706	0.306546
ENSMUSG00000005674	Tomm40l	1313.74	-0.405972	0.171117	-2.37249	0.0176689	0.112458
ENSMUSG00000005677	Nr1i3	5.52595	0.883696	1.20292	0.734627	0.462567	NA
ENSMUSG00000005681	Apoa2	16.6368	0.499281	0.566225	0.881771	0.377901	0.682564
ENSMUSG00000005682	Pan2	523.015	0.184095	0.149383	1.23236	0.217813	0.522117
ENSMUSG00000005683	Cs	11483.2	-0.0957983	0.0826189	-1.15952	0.246244	0.556121
ENSMUSG00000005686	Ampd3	265.461	1.02316	0.431808	2.36949	0.0178128	0.113253
ENSMUSG00000005687	Bcas2	1820.73	-0.169716	0.146624	-1.15749	0.247073	0.556763
ENSMUSG00000005696	Sh2d1a	34.253	-2.78685	1.82254	-1.5291	0.12624	0.384767
ENSMUSG00000005698	Ctcf	1734.54	0.136637	0.154778	0.88279	0.37735	0.681983
ENSMUSG00000005699	Pard6a	626.129	-0.105511	0.110626	-0.953766	0.340202	0.650102
ENSMUSG00000005705	Agrp	4.35101	-0.595503	1.1464	-0.519455	0.603444	NA
ENSMUSG00000005716	Pvalb	8.88432	-0.136723	0.75905	-0.180123	0.857056	0.956891
ENSMUSG00000005718	Tfap4	115.481	-0.183032	0.245966	-0.744135	0.456795	0.74109
ENSMUSG00000005732	Ranbp1	1567.91	-0.103848	0.0991579	-1.0473	0.294962	0.608675
ENSMUSG00000005763	Cd247	13.2764	0.199795	1.54851	0.129025	0.897338	0.97066
ENSMUSG00000005774	Rfx5	446.17	-0.0542975	0.174602	-0.310978	0.755817	0.914353
ENSMUSG00000005779	Psmb4	3334.02	-0.175255	0.089832	-1.95091	0.0510673	0.225898
ENSMUSG00000005802	Slc30a4	2434.81	0.107068	0.12373	0.865335	0.386855	0.688635
ENSMUSG00000005803	Sqor	26.8742	0.0188069	0.603114	0.031183	0.975124	0.992211
ENSMUSG00000005804	Bloc1s6	1979.75	0.226172	0.0946374	2.38988	0.0168537	0.108977
ENSMUSG00000005813	Metap1	1614.42	-0.171126	0.11284	-1.51653	0.129385	0.390491
ENSMUSG00000005823	Gpr108	272.703	-0.19629	0.161265	-1.21719	0.223531	0.528396
ENSMUSG00000005846	Rsl1d1	1998.35	0.179608	0.153298	1.17162	0.241348	0.550784
ENSMUSG00000005864	Cnga2	12.41	-2.32262	1.04579	-2.22093	0.026356	0.145307
ENSMUSG00000005871	Apc	26093.9	0.21259	0.294496	0.721876	0.470371	0.751171
ENSMUSG00000005873	Reep5	17570.8	-0.066286	0.0762353	-0.869493	0.384578	0.686543
ENSMUSG00000005881	Ergic3	3245.92	-0.343895	0.117331	-2.93097	0.00337902	0.034772
ENSMUSG00000005882	Uqcc1	1182.64	-0.474791	0.170361	-2.78698	0.00532021	0.0484638
ENSMUSG00000005886	Ncoa2	2842.36	-0.4898	0.142435	-3.43876	0.000584395	0.00934039
ENSMUSG00000005892	Trh	18.8959	1.08442	0.557102	1.94654	0.0515894	0.227428
ENSMUSG00000005893	Nr2c2	3908.43	0.445913	0.170286	2.61861	0.00882896	0.0702429
ENSMUSG00000005897	Nr2c1	187.18	0.0234986	0.19912	0.118012	0.906058	0.974259
ENSMUSG00000005899	Smpd4	1070.34	0.0896488	0.147975	0.605837	0.544623	0.805285
ENSMUSG00000005907	Pex1	525.286	-0.0390063	0.189463	-0.205878	0.836886	0.949246
ENSMUSG00000005917	Otx1	117.223	-0.602581	0.287804	-2.09372	0.0362853	0.181325
ENSMUSG00000005936	Kctd20	3106.22	0.0539141	0.094898	0.568126	0.569949	0.821993
ENSMUSG00000005947	Itgae	4.50115	0.826707	0.994584	0.831209	0.405855	NA
ENSMUSG00000005949	Ctns	316.565	0.15121	0.227428	0.664871	0.506133	0.778817
ENSMUSG00000005950	P2rx5	16.4339	0.49961	0.655677	0.761976	0.446074	0.734118
ENSMUSG00000005951	Shpk	85.8183	-0.270735	0.259256	-1.04428	0.296358	0.610079
ENSMUSG00000005952	Trpv1	35.1905	-0.510731	0.387893	-1.31668	0.187946	0.479585
ENSMUSG00000005958	Ephb3	561.425	0.0117187	0.193328	0.0606158	0.951665	0.986086
ENSMUSG00000005968	Tuft1	95.9411	-0.645005	0.39995	-1.61271	0.106807	0.350607
ENSMUSG00000005973	Rcn1	3620.53	-0.26712	0.105467	-2.53273	0.0113177	0.0825356
ENSMUSG00000005980	Dnase1	104.115	-0.423218	0.429988	-0.984255	0.32499	0.636981
ENSMUSG00000005981	Trap1	2189.01	-0.125786	0.112084	-1.12224	0.261759	0.574002
ENSMUSG00000005982	Naa60	3726.03	-0.0909344	0.11189	-0.812715	0.416381	0.712092
ENSMUSG00000005983	1700037C18Rik	109.349	0.0231487	0.243724	0.0949792	0.924331	0.979828
ENSMUSG00000005986	Ankrd13d	1732.85	-0.244542	0.140361	-1.74224	0.0814661	0.298692
ENSMUSG00000005994	Tyrp1	3.00967	0.444473	1.55891	0.285117	0.775554	NA
ENSMUSG00000006005	Tpr	4325.27	0.0787756	0.101026	0.779753	0.435536	0.726503
ENSMUSG00000006010	Odr4	1493.58	0.150877	0.131019	1.15157	0.249497	0.560014
ENSMUSG00000006014	Prg4	8.30348	0.100018	0.762078	0.131243	0.895583	0.97017
ENSMUSG00000006019	Dhx34	425.77	0.0194036	0.14937	0.129903	0.896643	0.970434
ENSMUSG00000006021	Kptn	418.478	0.208893	0.122543	1.70464	0.0882608	0.313639
ENSMUSG00000006024	Napa	3446.34	-0.143917	0.0874944	-1.64487	0.0999961	0.336551
ENSMUSG00000006050	Sra1	1398.54	-0.259718	0.138696	-1.87258	0.0611267	0.251669
ENSMUSG00000006057	Atp5g1	2319.57	-0.346682	0.102364	-3.38677	0.000707212	0.0109167
ENSMUSG00000006058	Snf8	1068.47	-0.366455	0.13396	-2.73556	0.00622744	0.0544901
ENSMUSG00000006095	Tbcb	2398.82	-0.361097	0.110506	-3.26766	0.0010844	0.0150413
ENSMUSG00000006127	Inpp5k	772.932	-0.257977	0.126103	-2.04576	0.0407796	0.195325
ENSMUSG00000006134	Crkl	1264.95	0.017025	0.166475	0.102267	0.918545	0.977867
ENSMUSG00000006154	Eps8l1	111.526	0.0821698	0.336098	0.244482	0.806858	0.936308
ENSMUSG00000006169	Clint1	1500.97	0.0304718	0.104169	0.292524	0.769886	0.922079
ENSMUSG00000006179	Prss16	5.05193	-1.33893	0.936238	-1.43011	0.152684	NA
ENSMUSG00000006191	Cdkal1	224.912	0.11885	0.274189	0.433459	0.664682	0.871478
ENSMUSG00000006204	Cdcp3	1.36688	1.20511	2.53563	0.47527	0.634594	NA
ENSMUSG00000006205	Htra1	1061.79	-0.902772	0.203605	-4.43393	9.25296e-06	0.000327107
ENSMUSG00000006215	Zbtb17	595.785	-0.153982	0.126502	-1.21723	0.223516	0.528396
ENSMUSG00000006216	Clcnkb	1.13404	3.20914	2.41422	1.32926	0.183761	NA
ENSMUSG00000006218	Fam131c	438.993	-0.724785	0.129848	-5.58179	2.3805e-08	1.97107e-06
ENSMUSG00000006219	Fblim1	211.091	-0.472913	0.186424	-2.53676	0.0111885	0.081895
ENSMUSG00000006221	Hspb7	1.00237	1.74844	2.6537	0.658867	0.509981	NA
ENSMUSG00000006235	Epor	6.81759	0.540303	0.786527	0.686948	0.492115	NA
ENSMUSG00000006241	Ccdc159	159.522	0.071509	0.209485	0.341356	0.732835	0.904039
ENSMUSG00000006262	Mob1b	1169.98	0.261095	0.197895	1.31936	0.187049	0.47791
ENSMUSG00000006269	Atp6v1b1	3.79536	0.712333	1.24756	0.57098	0.568013	NA
ENSMUSG00000006270	Vax1	13.7981	0.941566	1.0695	0.880382	0.378652	0.683085
ENSMUSG00000006273	Atp6v1b2	14182	0.164279	0.0849703	1.93337	0.0531908	0.231485
ENSMUSG00000006276	Eps15l1	1173.59	-0.0676204	0.115213	-0.586917	0.55726	0.81473
ENSMUSG00000006281	Tep1	39.9221	0.526904	0.585012	0.900671	0.367763	0.674748
ENSMUSG00000006288	Ttc5	1161.35	-0.14303	0.144791	-0.987837	0.323233	0.635067
ENSMUSG00000006289	Osgep	665.943	-0.0296421	0.148005	-0.200277	0.841264	0.951255
ENSMUSG00000006299	Aamp	3522.44	-0.233234	0.121583	-1.91831	0.0550715	0.236483
ENSMUSG00000006301	Tmbim1	210.466	-0.070497	0.257784	-0.273473	0.784489	0.928305
ENSMUSG00000006304	Arpc2	7132.09	-0.0613978	0.0956233	-0.64208	0.520821	0.789263
ENSMUSG00000006307	Kmt2b	1827.27	-0.0800065	0.167858	-0.476631	0.633625	0.856823
ENSMUSG00000006310	Zbtb32	15.9318	0.871704	0.542251	1.60757	0.10793	0.352508
ENSMUSG00000006313	Upk1a	5.49797	0.98429	0.944641	1.04197	0.297425	NA
ENSMUSG00000006315	Tmem147	1673.57	-0.158585	0.145621	-1.08903	0.276142	0.590112
ENSMUSG00000006333	Rps9	4116.4	-0.172786	0.112081	-1.54162	0.123165	0.379598
ENSMUSG00000006335	Tfpt	318.619	-0.272832	0.173662	-1.57105	0.116171	0.367153
ENSMUSG00000006342	Susd2	24.9666	-0.377617	0.43295	-0.872194	0.383102	0.685585
ENSMUSG00000006344	Ggt5	3.83183	1.47708	1.19084	1.24037	0.214839	NA
ENSMUSG00000006345	Ggt1	21.0775	-0.497349	0.562263	-0.884549	0.3764	0.681436
ENSMUSG00000006356	Crip2	4032.58	-0.25309	0.0979845	-2.58296	0.00979567	0.0755441
ENSMUSG00000006360	Crip1	5.51062	0.678078	0.878102	0.772208	0.439991	NA
ENSMUSG00000006362	Cbfa2t3	528.181	-1.41796	0.275557	-5.14579	2.66395e-07	1.58288e-05
ENSMUSG00000006369	Fbln1	525.746	0.00408219	0.119743	0.0340914	0.972804	0.991136
ENSMUSG00000006373	Pgrmc1	18737.1	-0.132879	0.0674722	-1.96939	0.0489086	0.219451
ENSMUSG00000006378	Gcat	530.469	-0.594076	0.115269	-5.15381	2.55244e-07	1.54747e-05
ENSMUSG00000006386	Tek	8.14233	1.7027	0.862667	1.97377	0.0484082	0.218002
ENSMUSG00000006389	Mpl	0.523421	2.16249	3.013	0.717721	0.472929	NA
ENSMUSG00000006390	Elovl1	163.19	-0.085135	0.21248	-0.400672	0.688661	0.883362
ENSMUSG00000006392	Med8	555.346	-0.703323	0.116241	-6.05055	1.44352e-09	1.55526e-07
ENSMUSG00000006395	Hyi	124.825	0.420556	0.211059	1.9926	0.0463055	0.212026
ENSMUSG00000006398	Cdc20	117.642	2.2263	0.488094	4.56121	5.08587e-06	0.000194777
ENSMUSG00000006403	Adamts4	135.277	1.52665	0.216275	7.05884	1.67901e-12	3.89989e-10
ENSMUSG00000006411	Nectin4	28.6376	0.906641	0.441741	2.05243	0.040128	0.193187
ENSMUSG00000006412	Pfdn2	1419.95	-0.164536	0.200676	-0.819911	0.412267	0.709048
ENSMUSG00000006418	Rnf114	1449.08	-0.158518	0.139575	-1.13572	0.256073	0.567658
ENSMUSG00000006423	Steep1	1288.43	-0.106559	0.144634	-0.736751	0.461274	0.745219
ENSMUSG00000006435	Neurl1a	2610.25	0.00429254	0.126171	0.0340218	0.97286	0.991136
ENSMUSG00000006442	Srm	1888.79	-0.353456	0.114482	-3.08744	0.0020189	0.0240044
ENSMUSG00000006445	Epha2	42.1812	1.00655	0.469151	2.14547	0.0319154	0.165691
ENSMUSG00000006456	Rbm14	1014.94	0.0603486	0.185692	0.324994	0.745186	0.909427
ENSMUSG00000006457	Actn3	64.8186	-0.444054	0.342355	-1.29706	0.194612	0.489099
ENSMUSG00000006462	A530013C23Rik	2.34608	0.771621	1.35588	0.569094	0.569292	NA
ENSMUSG00000006463	Zdhhc24	590.21	-0.653395	0.137654	-4.74667	2.06796e-06	9.08733e-05
ENSMUSG00000006464	Bbs1	1416.53	-0.160429	0.101296	-1.58377	0.113246	0.361737
ENSMUSG00000006469	Slc34a3	1.11132	1.99333	2.08867	0.954355	0.339904	NA
ENSMUSG00000006471	Ndor1	467.735	0.184187	0.199115	0.925029	0.354951	0.663492
ENSMUSG00000006476	Nsmf	10114.6	0.106224	0.118466	0.896666	0.369897	0.676216
ENSMUSG00000006494	Pdk1	3251.9	-0.28042	0.182239	-1.53874	0.123867	0.380908
ENSMUSG00000006498	Ptbp1	807.931	-0.131196	0.311841	-0.420715	0.673963	0.876321
ENSMUSG00000006517	Mvd	6142.03	-0.168624	0.126857	-1.32925	0.183766	0.473355
ENSMUSG00000006519	Cyba	20.8342	0.040346	0.497146	0.0811553	0.935318	0.983791
ENSMUSG00000006522	Itih3	13.0803	-0.814864	0.710029	-1.14765	0.251113	0.561817
ENSMUSG00000006526	Stimate	529.138	-0.213745	0.172809	-1.23689	0.216128	0.52013
ENSMUSG00000006527	Sfmbt1	791.094	0.0121882	0.166761	0.0730879	0.941736	0.985141
ENSMUSG00000006538	Ihh	4.23049	-0.944399	1.10108	-0.857706	0.391055	NA
ENSMUSG00000006542	Prkag3	0.743807	-2.17567	2.44379	-0.890286	0.373313	NA
ENSMUSG00000006546	Cryba2	1.59734	1.45233	2.195	0.661656	0.508192	NA
ENSMUSG00000006567	Atp7b	78.9227	-0.0146843	0.300371	-0.0488873	0.961009	0.988551
ENSMUSG00000006575	Rundc3a	5027.2	-0.232199	0.10775	-2.15498	0.0311633	0.162969
ENSMUSG00000006576	Slc4a3	3751.86	-0.181733	0.120886	-1.50334	0.132752	0.396174
ENSMUSG00000006585	Cdt1	93.2995	-0.127857	0.297959	-0.429108	0.667845	0.873321
ENSMUSG00000006586	Runx1t1	1780.23	0.0640199	0.215209	0.297478	0.766101	0.920629
ENSMUSG00000006587	Snai3	1.22226	0.593111	2.15424	0.275323	0.783068	NA
ENSMUSG00000006589	Aprt	1189.35	-0.413518	0.121992	-3.3897	0.000699682	0.0108564
ENSMUSG00000006599	Gtf2h1	1238.83	0.125679	0.0998006	1.2593	0.207921	0.508709
ENSMUSG00000006611	Hfe	38.6003	0.18152	0.454209	0.39964	0.689422	0.883703
ENSMUSG00000006638	Abhd1	63.4225	-0.548595	0.493477	-1.11169	0.26627	0.580052
ENSMUSG00000006641	Slc5a6	609.888	-0.683374	0.276262	-2.47365	0.0133742	0.0924258
ENSMUSG00000006642	Tcf23	1.57055	-0.322739	1.71127	-0.188597	0.850409	NA
ENSMUSG00000006649	Nphs1	2.16171	1.31038	1.68823	0.776186	0.437639	NA
ENSMUSG00000006651	Aplp1	24462	-0.248805	0.126834	-1.96166	0.0498024	0.221858
ENSMUSG00000006673	Qrich1	2259.15	-0.0520369	0.147377	-0.353087	0.724023	0.899795
ENSMUSG00000006675	P4htm	1016.26	0.117043	0.32213	0.36334	0.716351	0.89618
ENSMUSG00000006676	Usp19	2872.47	0.019042	0.135698	0.140326	0.888403	0.967313
ENSMUSG00000006678	Pola1	181.394	0.0206176	0.232649	0.0886211	0.929383	0.982118
ENSMUSG00000006699	Cdc42	12851.1	0.0692247	0.0885007	0.782193	0.434101	0.725665
ENSMUSG00000006705	Pknox1	493.361	-0.061416	0.141388	-0.43438	0.664012	0.871114
ENSMUSG00000006711	D130043K22Rik	1244.68	-0.225599	0.14292	-1.5785	0.114451	0.363889
ENSMUSG00000006715	Gmnn	55.8927	0.438579	0.471996	0.929201	0.352785	0.661559
ENSMUSG00000006717	Acot13	556.061	-0.185193	0.234524	-0.789656	0.429729	0.722228
ENSMUSG00000006720	Zfp184	164.578	0.183041	0.295495	0.619438	0.535628	0.799308
ENSMUSG00000006724	Cyp27b1	12.2909	-0.28177	0.66137	-0.42604	0.670079	0.874714
ENSMUSG00000006728	Cdk4	1781.74	-0.193173	0.104399	-1.85034	0.0642652	0.259454
ENSMUSG00000006731	B4galnt1	3558.64	-0.18318	0.102803	-1.78186	0.0747727	0.284716
ENSMUSG00000006732	Mettl1	449.71	0.00583233	0.193085	0.0302061	0.975903	0.992448
ENSMUSG00000006736	Tspan31	1842.14	0.199853	0.0914577	2.18519	0.0288748	0.155036
ENSMUSG00000006740	Kif5b	5665.66	0.207783	0.190795	1.08904	0.276137	0.590112
ENSMUSG00000006763	Saal1	342.497	-0.138112	0.147398	-0.937002	0.348757	0.657986
ENSMUSG00000006764	Tph2	21.2495	1.39326	0.478308	2.91291	0.00358083	0.0363262
ENSMUSG00000006777	Krt23	4.02673	0.200829	1.19267	0.168386	0.866279	NA
ENSMUSG00000006782	Cnp	459.242	-0.18304	0.369547	-0.49531	0.620381	0.849906
ENSMUSG00000006784	Odad4	29.6307	0.241231	0.536708	0.449463	0.653097	0.866831
ENSMUSG00000006800	Sulf2	3460.45	-0.330558	0.112334	-2.94264	0.00325423	0.0338254
ENSMUSG00000006818	Sod2	5209.12	-0.132382	0.0860629	-1.53821	0.123998	0.381116
ENSMUSG00000006850	Tmco6	322.365	-0.158777	0.145979	-1.08767	0.276739	0.59062
ENSMUSG00000006906	Stambp	1539.15	-0.102783	0.0926671	-1.10916	0.267361	0.581368
ENSMUSG00000006920	Ezh1	1322.71	0.189142	0.129228	1.46363	0.143295	0.412562
ENSMUSG00000006930	Hap1	3772.16	-0.412956	0.131126	-3.1493	0.00163663	0.020455
ENSMUSG00000006931	P3h4	310.473	-0.210701	0.24885	-0.846697	0.397164	0.69599
ENSMUSG00000006932	Ctnnb1	18085.3	-0.0639842	0.0718223	-0.890868	0.373	0.678947
ENSMUSG00000006941	Eif1b	2371.54	-0.226942	0.114738	-1.97791	0.0479386	0.216401
ENSMUSG00000006958	Chrd	129.197	0.148256	0.203112	0.729924	0.465437	0.747986
ENSMUSG00000006998	Psmd2	8880.28	-0.106704	0.13091	-0.815098	0.415016	0.710889
ENSMUSG00000007021	Syngr3	7456.99	-0.374881	0.123929	-3.02496	0.00248669	0.0278675
ENSMUSG00000007029	Vars	2742.21	-0.253466	0.138852	-1.82544	0.0679349	0.268804
ENSMUSG00000007030	Vwa7	19.6005	0.182161	0.515075	0.353659	0.723594	0.899714
ENSMUSG00000007033	Hspa1l	69.251	-0.0466762	0.313066	-0.149093	0.88148	0.964788
ENSMUSG00000007034	Slc44a4	0.487311	-1.47796	3.18773	-0.46364	0.642906	NA
ENSMUSG00000007035	Msh5	12.1934	-0.669499	0.701482	-0.954406	0.339878	0.649783
ENSMUSG00000007036	Abhd16a	1308.83	-0.39674	0.104607	-3.79266	0.000149041	0.00320384
ENSMUSG00000007038	Neu1	748.832	-0.140519	0.137556	-1.02154	0.307	0.619766
ENSMUSG00000007039	Ddah2	1428.35	-0.59812	0.165146	-3.62177	0.000292598	0.0054797
ENSMUSG00000007041	Clic1	337.75	0.204885	0.140298	1.46036	0.144191	0.414075
ENSMUSG00000007050	Lsm2	239.096	0.132303	0.210216	0.629366	0.529109	0.795287
ENSMUSG00000007080	Pole	89.2298	0.718774	0.343395	2.09314	0.0363366	0.18148
ENSMUSG00000007097	Atp1a2	10002.7	-0.778585	0.123127	-6.32342	2.55833e-10	3.36439e-08
ENSMUSG00000007107	Atp1a4	1.17049	0.711518	1.93848	0.36705	0.713582	NA
ENSMUSG00000007122	Casq1	15.6923	0.981282	0.612374	1.60242	0.109062	0.354585
ENSMUSG00000007207	Stx1a	7333.39	-0.134802	0.106556	-1.26508	0.205843	0.506024
ENSMUSG00000007209	Ceacam9	3.20471	2.16048	1.41029	1.53194	0.125538	NA
ENSMUSG00000007216	Zfp775	348.588	-0.396888	0.196563	-2.01914	0.0434726	0.20327
ENSMUSG00000007279	Scube2	26.8462	0.468442	0.436305	1.07366	0.282977	0.597314
ENSMUSG00000007338	Mrpl49	810.445	-0.0347765	0.114501	-0.303722	0.76134	0.917703
ENSMUSG00000007379	Dennd2c	27.5937	0.318786	0.504176	0.632292	0.527196	0.793958
ENSMUSG00000007411	Mark3	3899.81	0.164725	0.102315	1.60997	0.107404	0.351835
ENSMUSG00000007415	Gatad1	2024.04	-0.0207491	0.0800778	-0.259111	0.79555	0.932294
ENSMUSG00000007440	Pcdha10	462.498	0.323477	0.133136	2.42968	0.0151121	0.100786
ENSMUSG00000007458	M6pr	1229.44	-0.390543	0.100536	-3.88462	0.000102489	0.00237744
ENSMUSG00000007476	Lrrc8a	1642.89	-0.644877	0.106737	-6.04175	1.52449e-09	1.62294e-07
ENSMUSG00000007480	Mc5r	17.7952	0.432839	0.545714	0.793161	0.427684	0.720902
ENSMUSG00000007564	Ppp2r1a	23087.9	-0.14475	0.10434	-1.38729	0.165354	0.446462
ENSMUSG00000007570	Fance	580.349	-0.397969	0.241895	-1.64521	0.0999265	0.336531
ENSMUSG00000007589	Tinf2	323.204	0.473647	0.206187	2.29718	0.0216087	0.128524
ENSMUSG00000007591	Tssk4	2.81972	-0.448979	1.41006	-0.318412	0.750172	NA
ENSMUSG00000007594	Hapln4	206.857	3.4747	1.21019	2.87121	0.00408904	0.0400726
ENSMUSG00000007603	Dus3l	1233.51	-0.128275	0.126138	-1.01694	0.30918	0.621034
ENSMUSG00000007610	Gtpbp3	371.465	-0.183168	0.166029	-1.10323	0.269928	0.584675
ENSMUSG00000007613	Tgfbr1	459.84	0.0353082	0.18346	0.192457	0.847384	0.953894
ENSMUSG00000007617	Homer1	2977.1	0.426713	0.175126	2.4366	0.0148262	0.0993502
ENSMUSG00000007646	Rad51c	122.325	0.171077	0.27058	0.632262	0.527216	0.793958
ENSMUSG00000007653	Gabrb2	2652.62	0.265357	0.254477	1.04275	0.297063	0.610786
ENSMUSG00000007655	Cav1	506.483	-1.11004	0.318325	-3.48713	0.000488233	0.00809271
ENSMUSG00000007656	Arpp19	3511.99	-0.223096	0.0925424	-2.41075	0.0159199	0.104334
ENSMUSG00000007659	Bcl2l1	2724.17	0.0377476	0.0854369	0.441819	0.65862	0.869037
ENSMUSG00000007670	Khsrp	3329.97	-0.249906	0.115046	-2.17222	0.0298391	0.158581
ENSMUSG00000007682	Dio2	2063.57	-0.327056	0.171684	-1.90499	0.0567817	0.240943
ENSMUSG00000007721	Ccdc124	1298.95	-0.202263	0.145248	-1.39254	0.16376	0.443766
ENSMUSG00000007739	Cct4	4598.31	-0.00202444	0.0839147	-0.0241249	0.980753	0.994353
ENSMUSG00000007777	0610009B22Rik	264.318	0.0662238	0.16663	0.397431	0.691049	0.884861
ENSMUSG00000007783	Cpt1c	2116.01	0.090728	0.0921588	0.984474	0.324883	0.636935
ENSMUSG00000007805	Twist2	30.825	0.210784	0.372633	0.565661	0.571624	0.822751
ENSMUSG00000007812	Zfp655	829.407	0.130765	0.122781	1.06502	0.286865	0.600701
ENSMUSG00000007815	Rhoa	4596.95	0.0233841	0.104645	0.223462	0.823176	0.943206
ENSMUSG00000007817	Zmiz1	6076.97	-0.25805	0.191153	-1.34997	0.177026	0.464035
ENSMUSG00000007827	Ankrd26	457.662	0.0110818	0.23465	0.047227	0.962332	0.988637
ENSMUSG00000007833	Aldh16a1	107.128	-0.00400094	0.527462	-0.00758527	0.993948	0.99773
ENSMUSG00000007836	Hnrnpa0	4896.49	-0.0998844	0.088577	-1.12766	0.259465	0.57142
ENSMUSG00000007837	Prrg2	205.582	-0.0254866	0.179039	-0.142352	0.886802	0.966933
ENSMUSG00000007850	Hnrnph1	5245.91	-0.176637	0.0953213	-1.85307	0.063873	0.258396
ENSMUSG00000007867	Ift43	179.078	0.330316	0.262084	1.26034	0.207545	0.508117
ENSMUSG00000007872	Id3	43.4413	1.27435	0.604454	2.10826	0.0350084	0.17689
ENSMUSG00000007877	Tcap	3.6121	-0.357765	1.07418	-0.333058	0.739091	NA
ENSMUSG00000007880	Arid1a	4302.92	-0.155154	0.200851	-0.772487	0.439826	0.730185
ENSMUSG00000007888	Crlf1	309.606	-0.596959	0.195448	-3.05431	0.00225577	0.0260287
ENSMUSG00000007891	Ctsd	6274.09	-0.263717	0.111571	-2.36368	0.0180945	0.114432
ENSMUSG00000007892	Rplp1	11588.7	-0.279913	0.182794	-1.5313	0.125695	0.383635
ENSMUSG00000007908	Hmgcll1	476.906	-0.403922	0.194682	-2.07478	0.0380072	0.18685
ENSMUSG00000007944	Ttc9b	2500.18	-0.347859	0.121769	-2.85672	0.00428045	0.0413592
ENSMUSG00000007946	Phox2a	5.36159	1.85724	1.17536	1.58014	0.114074	NA
ENSMUSG00000007950	Abhd8	3664.96	-0.318342	0.116793	-2.72569	0.00641663	0.0554671
ENSMUSG00000007987	Ift22	1094.8	-0.186663	0.143765	-1.29839	0.194153	0.488523
ENSMUSG00000007989	Fzd3	5358.06	-0.889816	0.267107	-3.33131	0.000864376	0.0127913
ENSMUSG00000008028	1700008O03Rik	41.6968	0.850368	0.442894	1.92003	0.0548545	0.236062
ENSMUSG00000008035	Mid1ip1	1809.6	-0.274782	0.157985	-1.7393	0.0819823	0.29997
ENSMUSG00000008036	Ap2s1	4553.39	-0.0494406	0.152616	-0.323954	0.745973	0.909518
ENSMUSG00000008090	Fgfrl1	430.727	-0.136998	0.291246	-0.470386	0.638079	0.859112
ENSMUSG00000008129	Brme1	58.4717	-0.95932	0.553213	-1.73409	0.0829025	0.301671
ENSMUSG00000008136	Fhl2	238.877	0.10472	0.461851	0.22674	0.820626	0.941853
ENSMUSG00000008140	Emc10	5346.71	-0.132507	0.149944	-0.883709	0.376854	0.68183
ENSMUSG00000008153	Clstn3	10953.8	-0.0657208	0.0856896	-0.766963	0.443103	0.732298
ENSMUSG00000008167	Fbxw9	1447.93	0.00273872	0.117157	0.0233765	0.98135	0.994462
ENSMUSG00000008193	Spib	0.909175	1.83657	2.75266	0.667199	0.504645	NA
ENSMUSG00000008200	Fnbp4	1353.08	0.103774	0.170576	0.608374	0.542939	0.804179
ENSMUSG00000008206	Cers4	1667.61	0.188182	0.127353	1.47765	0.139502	0.407746
ENSMUSG00000008226	Scrn3	506.988	0.131695	0.155435	0.847268	0.396846	0.695774
ENSMUSG00000008301	Phax	1074.13	-0.0229988	0.127582	-0.180266	0.856944	0.956891
ENSMUSG00000008305	Tle1	1746.58	-0.124263	0.0940541	-1.32119	0.186439	0.477509
ENSMUSG00000008307	1700109H08Rik	37.5364	1.53618	0.975319	1.57506	0.115243	0.365288
ENSMUSG00000008318	Relt	174.377	0.0797921	0.229576	0.347563	0.728169	0.901953
ENSMUSG00000008333	Snrpb2	869.358	0.0412812	0.131688	0.313478	0.753917	0.913352
ENSMUSG00000008348	Ubc	30940.5	-0.197326	0.0979831	-2.01388	0.0440226	0.204837
ENSMUSG00000008373	Prpf31	962.887	-0.017381	0.107461	-0.161742	0.871509	0.961584
ENSMUSG00000008384	Sertad1	69.2869	-0.0136764	0.364225	-0.0375495	0.970047	0.991136
ENSMUSG00000008393	Carhsp1	1278.56	-0.39684	0.115352	-3.44027	0.000581141	0.00931336
ENSMUSG00000008398	Elk3	201.008	0.157036	0.227283	0.690926	0.489612	0.766764
ENSMUSG00000008429	Herpud2	1752.57	0.0181325	0.0987723	0.183579	0.854344	0.956311
ENSMUSG00000008435	Rdh13	1067.14	-0.0302903	0.161105	-0.188015	0.850865	0.954842
ENSMUSG00000008438	Adam21	10.8516	-0.0447175	0.625845	-0.0714514	0.943039	0.985468
ENSMUSG00000008450	Nutf2	358.513	0.174241	0.202479	0.860537	0.389493	0.689916
ENSMUSG00000008461	Fut1	20.0142	1.72846	0.538556	3.20944	0.00132992	0.0175281
ENSMUSG00000008475	Arpc5	7401.93	0.0958646	0.096514	0.993271	0.320578	0.63298
ENSMUSG00000008489	Elavl2	2627.16	0.244596	0.147267	1.6609	0.0967326	0.330606
ENSMUSG00000008496	Pou2f2	134.103	0.161509	0.324815	0.497233	0.619025	0.849163
ENSMUSG00000008540	Mgst1	278.366	-0.17172	0.173936	-0.987263	0.323514	0.635201
ENSMUSG00000008575	Nfib	3852.51	0.00210453	0.189849	0.0110853	0.991155	0.997233
ENSMUSG00000008590	Htr3b	0.767587	2.72	2.64323	1.02904	0.30346	NA
ENSMUSG00000008601	Rab25	1.77669	0.617529	1.82958	0.337525	0.735721	NA
ENSMUSG00000008604	Ubqln4	3055.88	-0.0963383	0.110494	-0.87189	0.383268	0.685585
ENSMUSG00000008658	Rbfox1	3772.43	0.090608	0.119661	0.757207	0.448926	0.735934
ENSMUSG00000008668	Rps18	5929.9	-0.216802	0.160016	-1.35488	0.175457	0.461613
ENSMUSG00000008682	Rpl10	3963.32	0.226907	0.313872	0.722929	0.469723	0.750693
ENSMUSG00000008683	Rps15a	3689.53	-0.0456223	0.158996	-0.28694	0.774159	0.923528
ENSMUSG00000008690	Ncaph2	2952.89	-0.182504	0.106345	-1.71615	0.086135	0.308646
ENSMUSG00000008730	Hipk1	2439.2	0.273497	0.216274	1.26458	0.206021	0.506069
ENSMUSG00000008734	Gprc5b	1428.21	-0.563064	0.122594	-4.59293	4.37068e-06	0.000171909
ENSMUSG00000008763	Man1a2	3958.06	0.693964	0.307034	2.26022	0.0238078	0.135996
ENSMUSG00000008822	Acyp1	280.427	0.0251708	0.176828	0.142346	0.886807	0.966933
ENSMUSG00000008855	Hdac5	4460.87	0.0113179	0.128792	0.0878776	0.929974	0.982118
ENSMUSG00000008859	Rala	5412.71	0.119788	0.127444	0.939927	0.347255	0.656378
ENSMUSG00000008892	Vdac3	6307.67	-0.282199	0.094689	-2.98027	0.00287994	0.0309915
ENSMUSG00000008932	Slc1a7	2.65207	0.88442	1.43542	0.616139	0.537803	NA
ENSMUSG00000008958	Vps72	692.337	-0.352408	0.144451	-2.43964	0.0147019	0.0987769
ENSMUSG00000008976	Gabpa	947.327	0.213525	0.270965	0.788017	0.430687	0.72266
ENSMUSG00000008999	Bmp7	228.564	-0.464983	0.189112	-2.45878	0.0139411	0.0949851
ENSMUSG00000009013	Dynll1	4955.58	-0.0549732	0.139226	-0.394848	0.692955	0.886156
ENSMUSG00000009030	Pdcl	1012.32	0.0980903	0.148953	0.658534	0.510195	0.781705
ENSMUSG00000009035	Tmem184b	1668.27	-0.527638	0.142312	-3.7076	0.000209234	0.0042094
ENSMUSG00000009070	Rsph14	1.64729	3.7906	2.1316	1.77829	0.0753559	NA
ENSMUSG00000009073	Nf2	6466.27	-0.0437786	0.0922381	-0.474626	0.635054	0.857181
ENSMUSG00000009075	Cabp7	112.42	-0.396584	0.260229	-1.52398	0.127513	0.387494
ENSMUSG00000009076	Zmat5	315.934	-0.297027	0.185112	-1.60458	0.108586	0.353617
ENSMUSG00000009079	Ewsr1	3463.3	0.039177	0.208624	0.187788	0.851043	0.954842
ENSMUSG00000009090	Ap1b1	4530.25	-0.0431293	0.130936	-0.329393	0.741859	0.908279
ENSMUSG00000009092	Derl3	21.0734	-0.434845	0.568492	-0.76491	0.444325	0.732961
ENSMUSG00000009097	Tbx1	0.688701	-0.629416	2.52259	-0.249512	0.802965	NA
ENSMUSG00000009108	Gnat2	8.45279	-1.99583	0.806358	-2.47512	0.013319	0.0921604
ENSMUSG00000009112	Bcl2l13	2136.47	0.0961494	0.131156	0.733094	0.463501	0.746552
ENSMUSG00000009115	Spatc1l	0.939337	-0.0815629	2.78841	-0.0292507	0.976665	NA
ENSMUSG00000009145	Dqx1	2.7024	-0.901118	1.40149	-0.64297	0.520243	NA
ENSMUSG00000009207	Lnpk	1324.4	0.0837767	0.199956	0.418975	0.675235	0.877084
ENSMUSG00000009214	Mymk	21.9754	-0.237043	0.508754	-0.465929	0.641266	0.86104
ENSMUSG00000009216	Fam163b	4591.48	-0.289725	0.103733	-2.793	0.0052222	0.0477989
ENSMUSG00000009246	Trpm5	10.6869	0.997233	0.651551	1.53055	0.12588	0.384014
ENSMUSG00000009248	Ascl2	3.16514	-1.47683	1.26588	-1.16665	0.243353	NA
ENSMUSG00000009281	Rarres2	26.8341	-0.136889	0.401773	-0.340713	0.73332	0.904201
ENSMUSG00000009291	Pttg1ip	1697.7	-0.211034	0.177802	-1.1869	0.235266	0.543592
ENSMUSG00000009292	Trpm2	858.352	-0.0620893	0.213067	-0.291408	0.770739	0.922484
ENSMUSG00000009293	Ube2g2	1240.71	-0.181362	0.156997	-1.15519	0.248011	0.558016
ENSMUSG00000009350	Mpo	2.36537	2.45001	1.88523	1.29958	0.193744	NA
ENSMUSG00000009356	Lpo	35.1522	2.50673	0.803811	3.11855	0.00181742	0.0221205
ENSMUSG00000009376	Met	7964.48	0.00212671	0.176506	0.0120489	0.990387	0.996863
ENSMUSG00000009378	Slc16a12	2.97114	0.880128	1.21117	0.726674	0.467426	NA
ENSMUSG00000009394	Syn2	13499.5	-0.371377	0.0825447	-4.4991	6.82425e-06	0.000252695
ENSMUSG00000009406	Elk1	875.837	-0.105028	0.106541	-0.985793	0.324235	0.636188
ENSMUSG00000009418	Nav1	12026.1	-0.066286	0.226288	-0.292928	0.769577	0.922066
ENSMUSG00000009470	Tnpo1	2479.78	-0.0820006	0.193666	-0.423413	0.671994	0.875592
ENSMUSG00000009471	Myod1	2.73936	3.48251	1.7166	2.02873	0.042486	NA
ENSMUSG00000009487	Otog	4.59476	0.0330252	1.14268	0.0289016	0.976943	NA
ENSMUSG00000009535	Rnmt	3296.96	0.156793	0.114738	1.36653	0.171772	0.456418
ENSMUSG00000009545	Kcnq1	13.8364	0.876178	0.93542	0.936668	0.348929	0.658038
ENSMUSG00000009549	Srp14	2000.99	-0.130084	0.128179	-1.01486	0.310172	0.622029
ENSMUSG00000009551	6330409D20Rik	40.4835	-0.195717	0.347107	-0.563853	0.572854	0.823355
ENSMUSG00000009555	Cdk9	1550.06	0.0593277	0.181902	0.326153	0.744309	0.909061
ENSMUSG00000009563	Tor2a	609.801	-0.184953	0.176771	-1.04628	0.29543	0.609202
ENSMUSG00000009566	Fpgs	272.863	-0.014665	0.285572	-0.0513531	0.959044	0.988335
ENSMUSG00000009569	Mrtfb	2261.27	0.0634181	0.165519	0.383147	0.701611	0.889926
ENSMUSG00000009575	Cbx5	5807.5	-0.244592	0.150244	-1.62796	0.103533	0.344017
ENSMUSG00000009585	Apobec3	40.796	0.949889	0.396967	2.39286	0.0167174	0.10833
ENSMUSG00000009596	Taf7l	19.9245	-0.0182551	0.531955	-0.0343171	0.972624	0.991136
ENSMUSG00000009614	Sardh	672.687	-0.595987	0.306427	-1.94496	0.0517803	0.227995
ENSMUSG00000009621	Vav2	2289.9	-0.20537	0.14197	-1.44658	0.148015	0.419665
ENSMUSG00000009628	Tex15	194.638	-0.294742	0.223142	-1.32087	0.186544	0.477509
ENSMUSG00000009630	Ppp2cb	2538.25	-0.194651	0.11394	-1.70837	0.0875683	0.311736
ENSMUSG00000009633	G0s2	30.4765	-0.0577784	0.417431	-0.138414	0.889913	0.967461
ENSMUSG00000009640	Dmap1	656.46	-0.0996039	0.113942	-0.874161	0.382031	0.68518
ENSMUSG00000009647	Mcu	1982.24	-0.00688181	0.0984983	-0.0698673	0.944299	0.985574
ENSMUSG00000009654	Oit3	2.036	1.83437	1.92778	0.951549	0.341326	NA
ENSMUSG00000009670	Tex11	15.9347	0.887728	0.606302	1.46417	0.143148	0.412404
ENSMUSG00000009681	Bcr	3489.31	-0.260887	0.122788	-2.12469	0.0336126	0.171859
ENSMUSG00000009687	Fxyd5	40.36	0.454523	0.369639	1.22964	0.218832	0.523127
ENSMUSG00000009731	Kcnd1	505.814	-0.0556212	0.17199	-0.323399	0.746393	0.909721
ENSMUSG00000009733	Tfcp2	776.561	-0.3303	0.152807	-2.16154	0.0306533	0.16126
ENSMUSG00000009734	Pou6f2	8.77694	-0.526589	0.860776	-0.611761	0.540696	0.802452
ENSMUSG00000009739	Pou6f1	2284.15	0.250133	0.143157	1.74727	0.0805911	0.296274
ENSMUSG00000009741	Ubp1	1729.69	0.0369956	0.107101	0.345427	0.729773	0.90256
ENSMUSG00000009772	Nuak2	149.733	0.174017	0.240284	0.724213	0.468935	0.750243
ENSMUSG00000009828	Cilk1	1523.1	0.145073	0.12736	1.13908	0.254671	0.566024
ENSMUSG00000009863	Sdhb	3682.3	-0.148842	0.101242	-1.47016	0.141518	0.410281
ENSMUSG00000009876	Cox4i2	5.88575	-0.0240215	0.91113	-0.0263645	0.978967	NA
ENSMUSG00000009894	Snap47	8747.99	-0.113377	0.0958902	-1.18237	0.23706	0.545595
ENSMUSG00000009900	Wnt3a	2.15012	0.0320136	1.58524	0.0201948	0.983888	NA
ENSMUSG00000009905	Kdsr	942.782	0.0920815	0.113311	0.812642	0.416423	0.712092
ENSMUSG00000009907	Vps4b	1290.49	0.324919	0.0967938	3.35682	0.000788447	0.0118999
ENSMUSG00000009927	Rps25	3093.4	-0.00295651	0.11803	-0.0250487	0.980016	0.993941
ENSMUSG00000009941	Nxf2	7.94749	-0.519374	0.841825	-0.616962	0.53726	0.800482
ENSMUSG00000009995	Tafazzin	519.168	0.194239	0.174344	1.11412	0.26523	0.578633
ENSMUSG00000010021	Kif19a	27.0846	0.232702	0.511305	0.455113	0.649028	0.865161
ENSMUSG00000010025	Aldh3a2	1550.37	-0.452482	0.108493	-4.1706	3.03801e-05	0.000873551
ENSMUSG00000010044	Zmynd10	89.169	0.898619	0.377809	2.3785	0.0173832	0.11126
ENSMUSG00000010045	Tmem115	1077.31	-0.303434	0.114548	-2.64897	0.00807378	0.0657258
ENSMUSG00000010047	Hyal2	356.4	-0.384913	0.221821	-1.73524	0.0826975	0.301293
ENSMUSG00000010048	Ifrd2	155.894	-0.606854	0.28964	-2.0952	0.0361534	0.18102
ENSMUSG00000010051	Hyal1	179.448	0.226612	0.273076	0.829852	0.406623	0.703289
ENSMUSG00000010054	Tusc2	1771.51	-0.231551	0.150807	-1.53541	0.124682	0.382137
ENSMUSG00000010057	Nprl2	546.325	-0.0845784	0.179808	-0.470382	0.638082	0.859112
ENSMUSG00000010064	Slc38a3	2741.19	-0.723555	0.151091	-4.78888	1.67718e-06	7.57482e-05
ENSMUSG00000010066	Cacna2d2	995.583	-0.492976	0.176577	-2.79185	0.00524084	0.047896
ENSMUSG00000010067	Rassf1	396.965	0.0960716	0.152808	0.628707	0.529541	0.795668
ENSMUSG00000010080	Epn3	11.2486	-0.0967264	0.69838	-0.138501	0.889844	0.967461
ENSMUSG00000010086	Rnf112	1476.01	-0.0208602	0.132494	-0.157443	0.874896	0.962865
ENSMUSG00000010095	Slc3a2	12655	-0.211504	0.0825363	-2.56255	0.0103906	0.0781808
ENSMUSG00000010097	Nxf1	1866.43	-0.313531	0.0794941	-3.94408	8.01056e-05	0.00193391
ENSMUSG00000010110	Stx5a	1123.5	-0.0377946	0.188124	-0.200903	0.840774	0.951011
ENSMUSG00000010122	Slc47a1	0.913991	1.66275	2.28524	0.727605	0.466855	NA
ENSMUSG00000010136	Pifo	17.366	0.205325	0.498743	0.411684	0.680571	0.878719
ENSMUSG00000010142	Tnfrsf13b	1.06427	1.04154	2.29791	0.453258	0.650363	NA
ENSMUSG00000010154	Spire2	605.465	-0.166589	0.13071	-1.27449	0.202489	0.500762
ENSMUSG00000010175	Prox1	112.75	-0.701938	0.333093	-2.10733	0.0350889	0.177078
ENSMUSG00000010205	Raver1	1063.41	0.0880985	0.115625	0.761934	0.446099	0.734118
ENSMUSG00000010277	2610507B11Rik	6858.91	-0.190551	0.135131	-1.41012	0.158505	0.435931
ENSMUSG00000010290	AI597479	1180.9	0.0728395	0.100602	0.724034	0.469045	0.750256
ENSMUSG00000010307	Tmem86a	346.299	-0.160013	0.234337	-0.682832	0.494713	0.770324
ENSMUSG00000010311	Optc	134.26	0.344012	0.210902	1.63115	0.10286	0.342897
ENSMUSG00000010342	Tex14	8.8258	2.56662	1.30464	1.9673	0.0491486	0.219866
ENSMUSG00000010358	Ifi35	5.54839	0.763547	0.910954	0.838184	0.401928	NA
ENSMUSG00000010362	Rdm1	79.1373	-0.624664	0.424401	-1.47187	0.141056	0.410059
ENSMUSG00000010376	Nedd8	2126.52	-0.13254	0.156941	-0.844523	0.398377	0.6968
ENSMUSG00000010392	Gosr1	1432.33	0.23528	0.136843	1.71935	0.0855513	0.307431
ENSMUSG00000010406	Mrpl52	519.877	-0.0635409	0.16622	-0.382271	0.702261	0.890021
ENSMUSG00000010453	Kansl3	2546.04	0.0118203	0.235907	0.0501056	0.960038	0.988335
ENSMUSG00000010461	Eya4	52.5435	0.246789	0.390704	0.631652	0.527614	0.794108
ENSMUSG00000010476	Ebf3	17.9983	0.275445	0.648618	0.424664	0.671081	0.875441
ENSMUSG00000010492	Uckl1os	29.4168	0.478691	2.44037	0.196155	0.844489	0.952651
ENSMUSG00000010505	Myt1	327.715	0.0583685	0.420391	0.138843	0.889574	0.967435
ENSMUSG00000010517	Faf1	1480.99	0.416723	0.224926	1.85271	0.0639233	0.258482
ENSMUSG00000010529	Gm266	7.21094	0.0301815	0.758408	0.0397958	0.968256	NA
ENSMUSG00000010538	Tsacc	25.6129	-0.0205171	0.413516	-0.0496162	0.960428	0.988335
ENSMUSG00000010554	Mettl16	1192.34	-0.0269618	0.143775	-0.187529	0.851246	0.954842
ENSMUSG00000010592	Dazl	69.1298	-0.2109	0.280638	-0.7515	0.452352	0.738235
ENSMUSG00000010601	Apol7a	5.52454	1.12386	0.970005	1.15861	0.246613	NA
ENSMUSG00000010607	Pigyl	320.817	-0.443068	0.176393	-2.51182	0.0120109	0.0861563
ENSMUSG00000010608	Rbm25	2454.13	0.35763	0.141461	2.52812	0.0114674	0.0833096
ENSMUSG00000010609	Psen2	691.852	-0.789348	0.266871	-2.95779	0.00309849	0.0326504
ENSMUSG00000010651	Acaa1b	14.2526	1.06894	0.600795	1.77921	0.0752057	0.285695
ENSMUSG00000010660	Plcd1	231.51	0.159394	0.184826	0.8624	0.388467	0.689696
ENSMUSG00000010663	Fads1	11330.1	-0.337056	0.0901057	-3.74067	0.000183528	0.00378156
ENSMUSG00000010721	Lmbr1	2154.42	0.145658	0.13925	1.04602	0.295552	0.609262
ENSMUSG00000010751	Tnfrsf22	118.917	-0.266298	0.458258	-0.581111	0.561166	0.816672
ENSMUSG00000010755	Cars	4259.31	0.194118	0.145039	1.33839	0.180771	0.469273
ENSMUSG00000010760	Phlda2	0.880682	-0.488308	2.36765	-0.206242	0.836602	NA
ENSMUSG00000010797	Wnt2	81.1857	-0.0836382	0.250191	-0.334297	0.738155	0.906028
ENSMUSG00000010803	Gabra1	1736.53	-0.0184258	0.146049	-0.126162	0.899604	0.971583
ENSMUSG00000010825	Grid2ip	99.7494	-0.532195	0.360471	-1.47639	0.13984	0.408132
ENSMUSG00000010830	Kdelr3	92.5783	0.40874	0.256559	1.59316	0.111124	0.358617
ENSMUSG00000010911	Apip	454.473	-0.229316	0.290079	-0.790529	0.429219	0.722066
ENSMUSG00000010914	Pdhx	1691.81	-0.159659	0.108868	-1.46654	0.142502	0.411669
ENSMUSG00000010936	Vac14	1440.8	-0.207953	0.0944244	-2.20232	0.0276428	0.15014
ENSMUSG00000011008	Mcoln2	1.38764	-3.56621e-05	2.31923	-1.53767e-05	0.999988	NA
ENSMUSG00000011034	Slc5a1	2.235	2.0658	1.64947	1.2524	0.210422	NA
ENSMUSG00000011096	Akt1s1	1644.34	-0.138489	0.160278	-0.864056	0.387557	0.688875
ENSMUSG00000011114	Tbrg1	1541.52	-0.0245714	0.113747	-0.216019	0.828973	0.946392
ENSMUSG00000011118	Panx3	1.8601	-1.64649	1.89129	-0.870566	0.383991	NA
ENSMUSG00000011148	Adssl1	41.3385	0.0860667	0.333474	0.258091	0.796337	0.932604
ENSMUSG00000011154	Cfap161	20.9506	0.30782	0.687273	0.447886	0.654235	0.8672
ENSMUSG00000011158	Brf1	938.68	-0.141461	0.1241	-1.13989	0.254331	0.565745
ENSMUSG00000011171	Vipr2	124.707	-0.00519915	0.376073	-0.0138248	0.98897	0.996716
ENSMUSG00000011179	Odc1	6414.24	0.202979	0.130264	1.55821	0.119183	0.37272
ENSMUSG00000011254	Thg1l	207.203	0.413611	0.295824	1.39817	0.162063	0.441306
ENSMUSG00000011256	Adam19	1459.32	-0.00915062	0.0912568	-0.100273	0.920127	0.978436
ENSMUSG00000011257	Pabpc4	2363.48	-0.0721299	0.148899	-0.484422	0.628087	0.854246
ENSMUSG00000011263	Exoc3l2	48.2931	0.0640087	0.326919	0.195794	0.844772	0.952651
ENSMUSG00000011267	Zfp296	11.5556	0.229776	0.629842	0.364816	0.715249	0.896119
ENSMUSG00000011305	Plin5	28.0139	-0.0844311	0.434934	-0.194124	0.846079	0.953264
ENSMUSG00000011306	Sugp1	973.304	-0.0294221	0.108998	-0.269933	0.787212	0.929269
ENSMUSG00000011349	Dmrtc2	1.79603	1.79738	1.64831	1.09043	0.275522	NA
ENSMUSG00000011382	Dhdh	111.388	0.37107	0.277626	1.33658	0.181359	0.469748
ENSMUSG00000011427	Zfp790	515.431	0.239657	0.256331	0.934951	0.349814	0.658432
ENSMUSG00000011463	Cpb1	9.3023	-0.676755	0.796798	-0.849343	0.395691	0.694566
ENSMUSG00000011486	Slc25a41	1.8233	0.669405	1.62182	0.41275	0.67979	NA
ENSMUSG00000011589	Fsd1	1435.85	-0.275184	0.0935955	-2.94014	0.00328059	0.0340127
ENSMUSG00000011632	Pinlyp	1.39395	1.28865	1.87028	0.689014	0.490815	NA
ENSMUSG00000011658	Fuz	158.526	-0.418232	0.421675	-0.991836	0.321277	0.633294
ENSMUSG00000011751	Sptbn4	2795.41	0.152324	0.108384	1.40541	0.1599	0.438017
ENSMUSG00000011752	Pgam1	13169.5	-1.18315	0.13499	-8.7647	1.87278e-18	1.28826e-15
ENSMUSG00000011831	Evi5	1974.08	-0.400497	0.19298	-2.07533	0.0379558	0.186751
ENSMUSG00000011832	Evi5l	4479.84	-0.187778	0.148694	-1.26285	0.206642	0.506966
ENSMUSG00000011837	Snapc2	718.547	-0.238657	0.159326	-1.49792	0.134155	0.398367
ENSMUSG00000011877	Git1	6522.08	0.207738	0.0931444	2.23028	0.0257287	0.142837
ENSMUSG00000011884	Gltp	378.493	-0.4623	0.138252	-3.34389	0.000826115	0.0123228
ENSMUSG00000011958	Bnip2	772.62	0.211725	0.128419	1.6487	0.0992089	0.335347
ENSMUSG00000011960	Ccnt1	1756.52	0.787732	0.117546	6.7015	2.06292e-11	3.68953e-09
ENSMUSG00000012017	Scarf2	277.58	1.08819	0.342381	3.17829	0.00148146	0.0189794
ENSMUSG00000012076	Brms1l	1555.15	-0.737745	0.186865	-3.94801	7.88042e-05	0.00190977
ENSMUSG00000012114	Med15	1895.86	-0.193829	0.109657	-1.7676	0.0771278	0.289417
ENSMUSG00000012117	Dhdds	2030.3	-0.0193681	0.0971845	-0.199293	0.842034	0.951765
ENSMUSG00000012123	Crybg2	71.8897	-0.435159	0.355224	-1.22503	0.220565	0.524994
ENSMUSG00000012126	Ubxn11	97.8737	-0.656828	0.489718	-1.34124	0.179844	0.468224
ENSMUSG00000012187	Mogat1	1.35117	1.38296	2.61934	0.527982	0.597512	NA
ENSMUSG00000012296	Tjap1	315.217	-0.344468	0.331439	-1.03931	0.298659	0.612468
ENSMUSG00000012350	Ehf	4.89351	-0.0202917	1.37022	-0.014809	0.988185	NA
ENSMUSG00000012396	Nanog	5.49959	0.0363226	1.15449	0.0314621	0.974901	NA
ENSMUSG00000012405	Rpl15	4191.63	-0.126687	0.210107	-0.602965	0.546532	0.806645
ENSMUSG00000012422	Tmem167	2431.24	-0.00122356	0.0990835	-0.0123487	0.990147	0.996863
ENSMUSG00000012428	Steap4	3.75512	3.96387	1.5928	2.48861	0.0128243	NA
ENSMUSG00000012429	Mplkip	283.711	0.1174	0.146563	0.80102	0.42312	0.717302
ENSMUSG00000012443	Kif11	146.415	1.64295	0.265133	6.19672	5.76516e-10	7.11103e-08
ENSMUSG00000012483	Rpa3	172.389	-0.32231	0.191216	-1.68558	0.0918765	0.320814
ENSMUSG00000012519	Mlkl	0.911194	1.66554	2.69266	0.618547	0.536215	NA
ENSMUSG00000012535	Tnpo3	3514.32	0.0707881	0.1538	0.460261	0.645329	0.863628
ENSMUSG00000012609	Ttll5	654.59	0.0274087	0.131763	0.208014	0.835218	0.9485
ENSMUSG00000012640	Zfp715	773.66	0.372306	0.212718	1.75023	0.0800785	0.295665
ENSMUSG00000012705	Retn	18.3213	0.91878	0.513067	1.79076	0.0733322	0.281146
ENSMUSG00000012819	Cdh23	22.1525	-0.0323109	0.931234	-0.0346968	0.972321	0.991136
ENSMUSG00000012848	Rps5	4789.55	-0.347584	0.140026	-2.48228	0.0130544	0.0909742
ENSMUSG00000012889	Podnl1	0.964191	1.51324	2.29244	0.660103	0.509188	NA
ENSMUSG00000013033	Adgrl1	20949.9	-0.161892	0.110511	-1.46493	0.142939	0.41234
ENSMUSG00000013076	Amotl1	1025.15	-0.152763	0.126521	-1.20741	0.227274	0.533928
ENSMUSG00000013089	Etv5	2740.14	1.03528	0.165601	6.25166	4.06122e-10	5.15142e-08
ENSMUSG00000013091	Tmem190	4.58864	0.41926	1.08633	0.385941	0.699541	NA
ENSMUSG00000013150	Gfod2	1439.34	-0.0519139	0.13527	-0.383779	0.701142	0.889926
ENSMUSG00000013155	Enkd1	312.52	-0.389576	0.150034	-2.59658	0.00941558	0.0734864
ENSMUSG00000013158	4933405L10Rik	19.8122	0.957434	0.628904	1.52239	0.127913	0.388173
ENSMUSG00000013160	Atp6v0d1	6330.05	-0.0998894	0.0910016	-1.09767	0.27235	0.586352
ENSMUSG00000013236	Ptprs	17834.3	-0.129102	0.0935443	-1.38012	0.16755	0.449067
ENSMUSG00000013275	Slc41a1	2346.43	-0.137847	0.106267	-1.29718	0.19457	0.489092
ENSMUSG00000013353	4931406B18Rik	1.44369	-0.639074	1.7887	-0.357284	0.720879	NA
ENSMUSG00000013367	Iglon5	1487.53	-0.168626	0.0908179	-1.85675	0.0633464	0.256905
ENSMUSG00000013415	Igf2bp1	14.7938	-0.100205	0.575614	-0.174083	0.8618	0.958587
ENSMUSG00000013418	B4galnt2	3.61001	1.26946	1.20481	1.05366	0.292038	NA
ENSMUSG00000013419	Zfp651	3349.79	-0.218551	0.0942747	-2.31824	0.0204362	0.123848
ENSMUSG00000013465	Nelfb	1514.65	-0.281101	0.13812	-2.03519	0.0418322	0.198506
ENSMUSG00000013483	Card14	10.515	0.54511	0.697359	0.781678	0.434404	0.725795
ENSMUSG00000013495	Tmem175	986.82	-0.127533	0.120777	-1.05594	0.290998	0.604612
ENSMUSG00000013523	Bcas1	1.77492	1.60111	1.71055	0.936023	0.349261	NA
ENSMUSG00000013539	Tango2	1486.5	-0.092964	0.152581	-0.609275	0.542342	0.803707
ENSMUSG00000013584	Aldh1a2	1.33122	0.942223	1.88616	0.499545	0.617395	NA
ENSMUSG00000013593	Ndufs2	3591.88	-0.164786	0.109355	-1.50689	0.131839	0.394966
ENSMUSG00000013611	Snx31	15.3321	-2.58357	0.996964	-2.59144	0.00955758	0.0742237
ENSMUSG00000013622	Atraid	1446.17	-0.096568	0.104251	-0.926299	0.354291	0.662834
ENSMUSG00000013629	Cad	1378.4	-0.669979	0.293626	-2.28174	0.0225045	0.131587
ENSMUSG00000013646	Sh3bp5l	1605.82	-0.334779	0.167766	-1.99552	0.0459867	0.211099
ENSMUSG00000013662	Atad1	5629.17	-0.0471505	0.0901027	-0.523297	0.600768	0.839221
ENSMUSG00000013663	Pten	9963.29	0.276834	0.143624	1.92749	0.0539182	0.233267
ENSMUSG00000013698	Pea15a	16627.7	-0.289859	0.0975918	-2.97012	0.00297685	0.0317728
ENSMUSG00000013701	Timm23	1010.05	-0.352048	0.152639	-2.30642	0.0210873	0.12639
ENSMUSG00000013707	Tnfaip8l2	2.9088	-0.449219	1.21966	-0.368315	0.712639	NA
ENSMUSG00000013736	Trnt1	1198.83	0.1933	0.126296	1.53053	0.125886	0.384014
ENSMUSG00000013766	Ly6g6e	11.7864	0.643214	0.655062	0.981913	0.326143	0.637867
ENSMUSG00000013787	Ehmt2	4841.23	-0.126789	0.117521	-1.07886	0.280649	0.595029
ENSMUSG00000013822	Elof1	736.654	-0.192287	0.147054	-1.30759	0.191012	0.48423
ENSMUSG00000013833	Med16	1318.91	-0.296601	0.136582	-2.17159	0.0298867	0.158754
ENSMUSG00000013846	St3gal1	3200.26	-0.00685453	0.0959717	-0.0714224	0.943062	0.985468
ENSMUSG00000013858	Tmem259	2242.63	-0.166641	0.109137	-1.52689	0.126788	0.385809
ENSMUSG00000013878	Rnf170	921.7	0.0420247	0.119041	0.353027	0.724068	0.899795
ENSMUSG00000013921	Clip3	13131.4	-0.230965	0.102619	-2.25071	0.0244036	0.137906
ENSMUSG00000013928	1700020L13Rik	4.79237	0.894506	0.949321	0.942258	0.346061	NA
ENSMUSG00000013936	Myl2	2.27135	2.31848	1.6577	1.39862	0.161928	NA
ENSMUSG00000013973	Dedd	811.544	0.0379046	0.16421	0.230829	0.817447	0.940861
ENSMUSG00000013974	Mcemp1	4.83698	0.0396609	1.13406	0.0349725	0.972102	NA
ENSMUSG00000013997	Nit1	750.041	-0.0866533	0.121029	-0.715972	0.474009	0.75444
ENSMUSG00000014030	Pax5	11.2104	0.783888	0.705214	1.11156	0.266327	0.580096
ENSMUSG00000014039	Prdm15	457.892	0.0276347	0.353832	0.0781012	0.937748	0.983846
ENSMUSG00000014074	Rnf168	1193.45	-0.207077	0.10257	-2.01889	0.0434992	0.203341
ENSMUSG00000014075	Dynlt2b	281.26	0.225639	0.141739	1.59193	0.111401	0.359445
ENSMUSG00000014077	Chp1	2876.55	-0.0388939	0.0789567	-0.492597	0.622297	0.850531
ENSMUSG00000014158	Trpv4	2.63623	-0.2233	1.25148	-0.178429	0.858386	NA
ENSMUSG00000014164	Klhl3	999.25	-0.617568	0.122983	-5.02157	5.12519e-07	2.73624e-05
ENSMUSG00000014177	Tvp23b	952.968	-0.0213951	0.231154	-0.092558	0.926255	0.980577
ENSMUSG00000014195	Dnajc7	4664.77	0.00719437	0.104889	0.0685902	0.945316	0.985647
ENSMUSG00000014198	Zfp385c	5.66624	1.90078	0.998713	1.90323	0.0570106	NA
ENSMUSG00000014226	Cacybp	3458.49	-0.00774666	0.0952325	-0.0813447	0.935168	0.983791
ENSMUSG00000014232	Cluap1	800.323	0.120777	0.126066	0.95805	0.338037	0.648343
ENSMUSG00000014243	Zswim7	150.014	0.0122933	0.193213	0.0636257	0.949268	0.98583
ENSMUSG00000014245	Pigl	190.221	-0.240265	0.195879	-1.2266	0.219974	0.524705
ENSMUSG00000014294	Ndufa2	1208.44	-0.23498	0.169632	-1.38523	0.165981	0.446969
ENSMUSG00000014301	Pam16	164.871	-0.344763	0.336852	-1.02349	0.306078	0.618484
ENSMUSG00000014303	Glis2	465.45	-0.895196	0.259028	-3.45599	0.00054828	0.0088742
ENSMUSG00000014313	Cox6c	2450.3	-0.0351902	0.137924	-0.255142	0.798613	0.933113
ENSMUSG00000014329	Bicc1	79.0809	0.0923781	0.268975	0.343445	0.731264	0.903082
ENSMUSG00000014349	Ube2z	4280.02	-0.0588443	0.103378	-0.569213	0.569212	0.82146
ENSMUSG00000014353	Tmem87b	1324.95	-0.106605	0.0992502	-1.0741	0.282778	0.597105
ENSMUSG00000014355	Anapc1	4484.82	0.265177	0.140432	1.8883	0.0589854	0.246254
ENSMUSG00000014361	Mertk	143.853	-0.431465	0.213646	-2.01954	0.0434316	0.203184
ENSMUSG00000014402	Tsg101	1963.7	-0.259157	0.098126	-2.64106	0.00826467	0.0669143
ENSMUSG00000014418	Hps5	338.066	-0.0828217	0.241281	-0.343259	0.731404	0.903082
ENSMUSG00000014426	Map3k4	1081.63	0.20433	0.10408	1.9632	0.0496226	0.221211
ENSMUSG00000014444	Piezo1	1128.85	-0.313293	0.327775	-0.955816	0.339165	0.649253
ENSMUSG00000014470	Rnf166	363.198	-0.288882	0.155346	-1.85961	0.0629412	0.255908
ENSMUSG00000014496	Ankrd28	1780.03	0.424541	0.256128	1.65753	0.0974118	0.332229
ENSMUSG00000014498	Ankrd52	3694.82	0.324986	0.140453	2.31385	0.0206761	0.125014
ENSMUSG00000014503	Pkd2l2	93.2786	0.277963	0.256223	1.08485	0.277987	0.5916
ENSMUSG00000014504	Srp19	1028.22	-0.0632893	0.141088	-0.448582	0.653734	0.866842
ENSMUSG00000014529	Tmbim7	0.651739	0.615637	2.53486	0.242868	0.808108	NA
ENSMUSG00000014547	Wdfy2	758.055	0.0162178	0.111486	0.14547	0.88434	0.965923
ENSMUSG00000014550	Rbsn	1865.2	-0.094057	0.179072	-0.525247	0.599411	0.83915
ENSMUSG00000014551	Mrps25	1275.23	-0.171683	0.207334	-0.828051	0.407642	0.704345
ENSMUSG00000014554	Dguok	374.056	-0.265407	0.159388	-1.66516	0.0958814	0.329176
ENSMUSG00000014592	Camta1	6427.41	0.277873	0.124415	2.23344	0.0255198	0.142166
ENSMUSG00000014599	Csf1	320.319	0.25065	0.205726	1.21837	0.223084	0.528025
ENSMUSG00000014601	Strip1	4865.43	0.00984539	0.140579	0.0700348	0.944166	0.98555
ENSMUSG00000014602	Kif1a	45979.6	0.0737271	0.167703	0.439628	0.660207	0.869499
ENSMUSG00000014606	Slc25a11	2513.84	-0.460434	0.169442	-2.71736	0.00658056	0.0563935
ENSMUSG00000014609	Chrne	1.38903	0.255904	2.02026	0.126669	0.899202	NA
ENSMUSG00000014633	Cmc2	137.731	0.168553	0.257784	0.653853	0.513206	0.784675
ENSMUSG00000014668	Chfr	2420.91	0.16171	0.135419	1.19415	0.232419	0.540437
ENSMUSG00000014686	Ceacam16	53.2905	-0.493869	0.31606	-1.56258	0.118152	0.370662
ENSMUSG00000014725	Adam28	2.73095	0.209863	1.26851	0.165441	0.868597	NA
ENSMUSG00000014747	Ankrd53	8.44727	0.753276	0.793083	0.949806	0.342211	0.651804
ENSMUSG00000014748	Tex261	1672.05	-0.185751	0.177155	-1.04852	0.294398	0.608294
ENSMUSG00000014763	Fam120b	1727.68	0.0161077	0.0857639	0.187815	0.851022	0.954842
ENSMUSG00000014767	Tbp	571.574	-0.0354384	0.11385	-0.311273	0.755593	0.914282
ENSMUSG00000014769	Psmb1	3211.12	-0.0793211	0.129153	-0.614164	0.539107	0.801623
ENSMUSG00000014771	Pdcd2	283.418	-0.12978	0.149797	-0.866376	0.386284	0.688131
ENSMUSG00000014773	Dll1	300.473	-0.331912	0.155932	-2.12857	0.0332896	0.170603
ENSMUSG00000014776	Nol3	196.137	-0.505874	0.236972	-2.13474	0.0327819	0.168478
ENSMUSG00000014778	Fhod1	42.4325	1.05612	0.384193	2.74893	0.00597899	0.0530905
ENSMUSG00000014782	Plekhg4	41.5851	-0.555796	0.575632	-0.96554	0.334274	0.644582
ENSMUSG00000014786	Slc9a5	723.298	-0.283932	0.1751	-1.62154	0.104901	0.346473
ENSMUSG00000014791	Elmo3	14.2139	0.867938	0.679774	1.2768	0.201671	0.499376
ENSMUSG00000014813	Stc1	366.196	-0.121009	0.158776	-0.762139	0.445977	0.734118
ENSMUSG00000014837	4931428F04Rik	4543.76	0.0876413	0.0979937	0.894357	0.371131	0.677107
ENSMUSG00000014846	Tppp3	947.096	-0.754603	0.142615	-5.2912	1.21516e-07	8.01962e-06
ENSMUSG00000014850	Msh3	730.231	-0.0608142	0.177037	-0.343511	0.731214	0.903082
ENSMUSG00000014852	Adamts13	15.9878	0.396917	0.597447	0.664356	0.506462	0.779056
ENSMUSG00000014856	Tmem208	721.242	-0.108919	0.164208	-0.663301	0.507138	0.779425
ENSMUSG00000014859	E2f4	710.758	-0.063877	0.139843	-0.456776	0.647832	0.864632
ENSMUSG00000014867	Surf4	3965.15	-0.27719	0.14404	-1.9244	0.0543048	0.234543
ENSMUSG00000014873	Surf2	543.361	0.0677063	0.127183	0.532351	0.594483	0.83638
ENSMUSG00000014905	Dnajb9	1071.84	0.198605	0.218897	0.907297	0.36425	0.672302
ENSMUSG00000014907	Naf1	635.492	0.254407	0.176389	1.44231	0.149216	0.421934
ENSMUSG00000014932	Yes1	623.083	0.0842562	0.204413	0.412186	0.680203	0.878411
ENSMUSG00000014956	Ppp1cb	10234.2	0.130844	0.0870594	1.50293	0.132857	0.396223
ENSMUSG00000014959	Gorasp2	3142.25	-0.303134	0.0971355	-3.12073	0.00180402	0.0220649
ENSMUSG00000014980	Tsen15	361.327	-0.219203	0.3729	-0.587835	0.556643	0.814161
ENSMUSG00000015002	Efr3a	2253	0.589071	0.15861	3.71396	0.000204041	0.00411418
ENSMUSG00000015013	Trappc2l	762.461	-0.180302	0.201361	-0.895416	0.370565	0.676418
ENSMUSG00000015016	Acsf3	386.125	-0.141108	0.136506	-1.03372	0.301269	0.614343
ENSMUSG00000015023	Ddx19a	758.472	-0.137498	0.140727	-0.97706	0.328539	0.639691
ENSMUSG00000015027	Galns	344.557	-0.132923	0.236183	-0.562796	0.573574	0.823833
ENSMUSG00000015083	C8g	32.5993	0.204719	0.378176	0.541332	0.588279	0.832321
ENSMUSG00000015085	Entpd2	57.3195	-1.17217	0.37071	-3.16196	0.0015671	0.0198288
ENSMUSG00000015087	Rabl6	2397.85	0.227843	0.0879594	2.59032	0.00958862	0.0743907
ENSMUSG00000015090	Ptgds	61.33	-0.483172	0.31138	-1.55171	0.120731	0.375071
ENSMUSG00000015092	Edf1	1864.54	-0.201436	0.111992	-1.79867	0.0720717	0.278837
ENSMUSG00000015093	Clic3	12.2551	1.16685	0.664581	1.75577	0.0791283	0.293414
ENSMUSG00000015094	Npdc1	6382.83	-0.1284	0.0911195	-1.40914	0.158794	0.436459
ENSMUSG00000015095	Fbxw5	2480.69	-0.267356	0.113762	-2.35013	0.0187668	0.11703
ENSMUSG00000015112	Slc25a13	37.1726	0.0130655	0.608672	0.0214656	0.982874	0.994889
ENSMUSG00000015120	Ube2i	2120.82	-0.406894	0.0901573	-4.51315	6.38712e-06	0.000238484
ENSMUSG00000015126	Tsr3	673.216	-0.122371	0.118977	-1.02853	0.3037	0.616508
ENSMUSG00000015127	Unkl	1195.11	-0.189983	0.115335	-1.64722	0.0995119	0.335742
ENSMUSG00000015133	Lrrk1	41.8747	1.42348	0.572538	2.48626	0.0129092	0.0903646
ENSMUSG00000015134	Aldh1a3	552.817	-0.272658	0.158294	-1.72248	0.0849833	0.306005
ENSMUSG00000015143	Actn1	1575.67	0.15668	0.10467	1.4969	0.134419	0.398672
ENSMUSG00000015149	Sirt2	2054.9	-0.316833	0.153032	-2.07037	0.0384173	0.18809
ENSMUSG00000015165	Hnrnpl	4893.39	-0.0423653	0.0905428	-0.467904	0.639854	0.860111
ENSMUSG00000015176	Nolc1	1904.47	0.159248	0.10921	1.45818	0.14479	0.414928
ENSMUSG00000015189	Casd1	1920.68	-0.0720471	0.128313	-0.561495	0.57446	0.824347
ENSMUSG00000015202	Cnksr3	37.8028	-0.142563	0.359943	-0.396071	0.692052	0.88561
ENSMUSG00000015214	Mtmr1	876.61	0.188057	0.103267	1.82107	0.0685963	0.270304
ENSMUSG00000015217	Hmgb3	3073.67	-0.257447	0.100549	-2.56042	0.0104546	0.0784645
ENSMUSG00000015222	Map2	41927	0.0898827	0.226789	0.396328	0.691863	0.8855
ENSMUSG00000015224	Cyp2j9	159.233	-0.649631	0.186816	-3.47738	0.000506334	0.00834203
ENSMUSG00000015243	Abca1	2279.68	-0.404095	0.172363	-2.34444	0.0190558	0.118338
ENSMUSG00000015247	Nipsnap3b	992.36	-0.181768	0.121538	-1.49556	0.134768	0.39926
ENSMUSG00000015289	Lage3	390.016	-0.244395	0.167209	-1.46161	0.143848	0.413488
ENSMUSG00000015290	Ubl4a	2007.62	-0.102806	0.100932	-1.01857	0.308409	0.620669
ENSMUSG00000015291	Gdi1	15930.6	-0.0891028	0.0800259	-1.11342	0.265527	0.578998
ENSMUSG00000015305	Sash1	1239.73	-0.14042	0.127423	-1.10199	0.270465	0.584976
ENSMUSG00000015312	Gadd45b	139.343	0.0364582	0.25546	0.142716	0.886515	0.966933
ENSMUSG00000015314	Slamf6	2.76972	-1.09853	1.21091	-0.907194	0.364304	NA
ENSMUSG00000015316	Slamf1	10.636	0.615854	0.676338	0.910571	0.362522	0.670913
ENSMUSG00000015335	Zdhhc12	274.761	-0.596401	0.140529	-4.24396	2.19607e-05	0.000674858
ENSMUSG00000015337	Endog	211.139	-0.33	0.173926	-1.89736	0.0577806	0.243266
ENSMUSG00000015340	Cybb	1.39912	2.43206	2.13119	1.14117	0.253798	NA
ENSMUSG00000015341	Golga7	2343.52	0.0193763	0.0917702	0.211139	0.832779	0.947652
ENSMUSG00000015342	Xk	649.682	-0.0161924	0.145775	-0.111078	0.911554	0.975735
ENSMUSG00000015354	Pcolce2	33.0667	-0.80546	0.517988	-1.55498	0.119952	0.373817
ENSMUSG00000015357	Clpx	740.174	-0.0942469	0.144485	-0.652293	0.514212	0.785504
ENSMUSG00000015363	Trabd	704.644	0.0062775	0.126265	0.0497168	0.960348	0.988335
ENSMUSG00000015365	Mov10l1	7.36396	2.43454	1.66751	1.45999	0.144294	0.414237
ENSMUSG00000015377	Dennd6b	1066.09	-0.0540901	0.117197	-0.46153	0.644418	0.863004
ENSMUSG00000015396	Cd83	274.539	0.630537	0.152321	4.13952	3.48033e-05	0.000978505
ENSMUSG00000015451	C4a	25.5817	-0.396692	0.794029	-0.499594	0.617361	0.848199
ENSMUSG00000015452	Ager	8.42626	0.443221	0.76248	0.581289	0.561046	0.816672
ENSMUSG00000015461	Atf6b	2858.31	-0.418804	0.118577	-3.53192	0.000412558	0.00710164
ENSMUSG00000015467	Egfl8	2.46713	1.29809	1.45272	0.893559	0.371558	NA
ENSMUSG00000015468	Notch4	51.896	0.180326	0.769806	0.234249	0.814792	0.939619
ENSMUSG00000015474	Ppt2	605.085	-0.316279	0.146051	-2.16553	0.0303468	0.160198
ENSMUSG00000015476	Prrt1	1335.61	-0.233496	0.134289	-1.73876	0.0820773	0.300195
ENSMUSG00000015478	Rnf5	1530.63	-0.158899	0.111863	-1.42049	0.155466	0.431556
ENSMUSG00000015484	Fam163a	179.83	0.812549	0.197133	4.12183	3.75871e-05	0.00104224
ENSMUSG00000015488	Cacfd1	2043.05	-0.218108	0.0982734	-2.2194	0.0264596	0.145614
ENSMUSG00000015501	Hivep2	8202.77	0.628022	0.182061	3.44952	0.000561581	0.00905669
ENSMUSG00000015519	2310057J18Rik	0.53008	0.719733	3.08017	0.233667	0.815244	NA
ENSMUSG00000015522	Arnt	472.254	-0.401559	0.396282	-1.01331	0.31091	0.623178
ENSMUSG00000015533	Itga2	23.0139	1.40962	0.531267	2.65331	0.00797057	0.0650336
ENSMUSG00000015536	Mocs2	1188.56	-0.1911	0.152172	-1.25581	0.209185	0.510405
ENSMUSG00000015542	Nat9	368.682	-0.0543195	0.200515	-0.270899	0.786468	0.929094
ENSMUSG00000015568	Lpl	1549.71	0.196475	0.105906	1.85518	0.0635705	0.257522
ENSMUSG00000015575	Atp6v0e	313.694	-0.13774	0.174725	-0.788323	0.430508	0.722513
ENSMUSG00000015579	Nkx2-5	1.08678	2.01888	2.51234	0.803585	0.421637	NA
ENSMUSG00000015597	Zfp318	2564.09	0.101523	0.174781	0.58086	0.561335	0.816672
ENSMUSG00000015599	Ttbk1	4521.77	-0.256885	0.101255	-2.53701	0.0111802	0.081895
ENSMUSG00000015605	Srf	923.434	-0.0306569	0.154526	-0.198393	0.842738	0.951973
ENSMUSG00000015619	Gata3	2.36217	1.21938	1.89861	0.642247	0.520713	NA
ENSMUSG00000015627	Gata5	1.12647	1.94716	2.11815	0.919273	0.357953	NA
ENSMUSG00000015647	Lama5	364.432	-1.12505	0.323946	-3.47295	0.000514776	0.00842339
ENSMUSG00000015652	Steap1	17.9891	0.173894	0.552142	0.314945	0.752804	0.912683
ENSMUSG00000015653	Steap2	289.076	-0.349659	0.214684	-1.62871	0.103374	0.344017
ENSMUSG00000015656	Hspa8	68923.2	-0.037035	0.0791321	-0.468014	0.639774	0.860111
ENSMUSG00000015659	Serac1	577.845	0.384248	0.179666	2.13868	0.0324613	0.16736
ENSMUSG00000015668	Pdzd11	737.914	-0.247695	0.111458	-2.2223	0.0262627	0.145016
ENSMUSG00000015671	Psma2	2462.59	-0.0975944	0.103126	-0.94636	0.343965	0.652298
ENSMUSG00000015672	Mrpl32	669.545	0.114185	0.125642	0.908811	0.36345	0.671854
ENSMUSG00000015697	Setdb1	1822.16	-0.00188387	0.112318	-0.0167727	0.986618	0.995524
ENSMUSG00000015702	Anxa9	11.1217	-0.935871	0.803858	-1.16422	0.244333	0.554283
ENSMUSG00000015709	Arnt2	8384.66	-0.0216436	0.102675	-0.210796	0.833046	0.947775
ENSMUSG00000015711	Prune1	1944.53	-0.144976	0.098167	-1.47683	0.13972	0.407984
ENSMUSG00000015714	Cers2	886.297	-0.152714	0.132426	-1.1532	0.248828	0.559082
ENSMUSG00000015721	Nlrp5	2.16564	-0.647042	1.56301	-0.413971	0.678895	NA
ENSMUSG00000015733	Capza2	6937.86	0.151444	0.0840468	1.8019	0.0715612	0.277389
ENSMUSG00000015745	Plekho1	459.841	-0.294532	0.146945	-2.00436	0.045031	0.207733
ENSMUSG00000015747	Vps45	1118.06	-0.0582851	0.0959549	-0.607422	0.543571	0.804849
ENSMUSG00000015748	Prpf3	418.173	-0.385903	0.202904	-1.9019	0.0571846	0.242013
ENSMUSG00000015749	Anp32e	4034.87	0.0361238	0.169025	0.213719	0.830766	0.946928
ENSMUSG00000015750	Aph1a	1455.95	-0.380466	0.168795	-2.25402	0.0241952	0.137288
ENSMUSG00000015755	Tab2	2352.42	0.20551	0.139563	1.47252	0.14088	0.40983
ENSMUSG00000015757	Ppil4	1219.3	-0.15238	0.107616	-1.41596	0.156786	0.433622
ENSMUSG00000015759	Cnih1	1951.74	0.0143217	0.0982518	0.145765	0.884107	0.965812
ENSMUSG00000015766	Eps8	1145.77	0.332286	0.231702	1.43411	0.151542	0.425713
ENSMUSG00000015776	Med22	1114.99	-0.398649	0.118242	-3.37147	0.000747669	0.0113902
ENSMUSG00000015790	Surf1	1113.52	-0.163821	0.129253	-1.26745	0.204994	0.504611
ENSMUSG00000015804	Med28	1401.8	-0.264904	0.138249	-1.91614	0.055347	0.236964
ENSMUSG00000015806	Qdpr	2396.29	-0.429155	0.107068	-4.00826	6.11678e-05	0.00155122
ENSMUSG00000015812	Gnrh1	1.85895	-1.25127	1.63831	-0.763758	0.445012	NA
ENSMUSG00000015829	Tnr	3008.4	-0.00121311	0.226508	-0.00535573	0.995727	0.998182
ENSMUSG00000015837	Sqstm1	11283.3	-0.0973358	0.102766	-0.947163	0.343556	0.652085
ENSMUSG00000015839	Nfe2l2	613.928	0.116347	0.108883	1.06855	0.285272	0.599119
ENSMUSG00000015843	Rxrg	78.9267	-0.475301	0.26064	-1.8236	0.0682133	0.269493
ENSMUSG00000015846	Rxra	386.232	-0.00621189	0.171597	-0.0362005	0.971122	0.991136
ENSMUSG00000015850	Adamtsl4	26.7153	-0.837972	0.707824	-1.18387	0.236464	0.544855
ENSMUSG00000015869	Prpsap1	1008.95	-0.272871	0.130972	-2.08344	0.0372115	0.184664
ENSMUSG00000015879	Fam184b	1325.54	-0.470699	0.117563	-4.00381	6.23297e-05	0.00157304
ENSMUSG00000015880	Ncapg	175.005	0.40719	0.293216	1.3887	0.164924	0.4455
ENSMUSG00000015882	Lcorl	3614.13	0.403419	0.268245	1.50392	0.132602	0.39584
ENSMUSG00000015889	Lta4h	1362.17	0.044081	0.103676	0.42518	0.670705	0.875078
ENSMUSG00000015890	Amdhd1	74.3728	0.235593	0.28836	0.817008	0.413924	0.710259
ENSMUSG00000015932	Dstn	11684.3	0.101086	0.07052	1.43344	0.151731	0.425748
ENSMUSG00000015937	Macroh2a1	1865.02	-0.0824366	0.126087	-0.653807	0.513236	0.784675
ENSMUSG00000015942	Gtf2ird2	335.057	0.0407307	0.171007	0.238182	0.81174	0.937818
ENSMUSG00000015943	Bola1	214.091	-0.279365	0.184822	-1.51154	0.130651	0.393051
ENSMUSG00000015944	Castor2	3649.11	0.212105	0.123621	1.71578	0.0862029	0.308675
ENSMUSG00000015950	Ncf1	6.04002	-1.5271	1.23854	-1.23298	0.217581	NA
ENSMUSG00000015957	Wnt11	11.6261	0.314535	0.756368	0.41585	0.67752	0.877883
ENSMUSG00000015961	Adss	1639.82	-0.00258603	0.100989	-0.025607	0.979571	0.993908
ENSMUSG00000015966	Il17rb	5.60191	2.10112	1.0312	2.03755	0.0415951	NA
ENSMUSG00000015968	Cacna1d	1251.93	0.030505	0.224783	0.135709	0.892051	0.968588
ENSMUSG00000015970	Chdh	11.4728	1.68208	0.67048	2.50877	0.0121152	0.0863958
ENSMUSG00000015971	Actr8	815.717	0.077039	0.167616	0.459617	0.645791	0.863934
ENSMUSG00000015980	Lrrc27	232.205	0.212308	0.20557	1.03278	0.301707	0.614863
ENSMUSG00000015981	Stk32c	1921.42	-0.372047	0.125124	-2.97343	0.00294488	0.0315573
ENSMUSG00000015994	Fnta	1135.88	-0.156077	0.111548	-1.39919	0.161755	0.440736
ENSMUSG00000016018	Mtrex	1686.28	-0.0454975	0.111065	-0.409647	0.682065	0.879832
ENSMUSG00000016024	Lbp	1.51096	1.32277	2.05301	0.64431	0.519374	NA
ENSMUSG00000016028	Celsr1	498.838	-1.72857	0.271805	-6.35961	2.02273e-10	2.7053e-08
ENSMUSG00000016087	Fli1	2.25803	-0.421399	1.55988	-0.270149	0.787045	NA
ENSMUSG00000016128	Stard13	61.6678	-0.389172	0.683666	-0.569243	0.569191	0.82146
ENSMUSG00000016150	Tenm1	6682.57	0.12045	0.298201	0.403922	0.68627	0.882137
ENSMUSG00000016179	Camk1g	1732.02	-0.0177159	0.104703	-0.169202	0.865638	0.959703
ENSMUSG00000016181	Utp25	548.267	0.0978671	0.28383	0.344809	0.730238	0.902765
ENSMUSG00000016194	Hsd11b1	82.1505	0.309818	0.282243	1.0977	0.272336	0.586352
ENSMUSG00000016200	Syt14	827.233	0.397324	0.178824	2.22187	0.0262919	0.145088
ENSMUSG00000016206	H2-M3	37.6421	-0.268316	0.338591	-0.79245	0.428099	0.721091
ENSMUSG00000016239	Lonrf3	159.219	-0.27916	0.346076	-0.806644	0.419872	0.714773
ENSMUSG00000016252	Atp5e	1777.95	-0.228132	0.130402	-1.74945	0.0802131	0.295674
ENSMUSG00000016253	Nelfcd	1230.21	-0.0438948	0.17303	-0.253683	0.799741	0.933884
ENSMUSG00000016255	Tubb1	0.40211	1.77658	3.29553	0.539087	0.589827	NA
ENSMUSG00000016256	Ctsz	189.937	0.695862	0.216192	3.21872	0.00128766	0.0170213
ENSMUSG00000016257	Prelid3b	1061.74	-0.209319	0.163429	-1.2808	0.200265	0.497422
ENSMUSG00000016262	Sertad4	670.629	-0.0248509	0.211998	-0.117223	0.906684	0.974435
ENSMUSG00000016308	Ube2a	1146.37	-0.0919903	0.104753	-0.878163	0.379855	0.683513
ENSMUSG00000016319	Slc25a5	4234.58	-0.218935	0.13542	-1.61671	0.105941	0.34875
ENSMUSG00000016344	Ppdpf	1886.67	-0.435467	0.12239	-3.55803	0.000373646	0.00660341
ENSMUSG00000016346	Kcnq2	10998.5	-0.135064	0.140675	-0.960115	0.336997	0.647181
ENSMUSG00000016349	Eef1a2	7243.89	-0.21762	0.0919893	-2.36571	0.0179954	0.114009
ENSMUSG00000016356	Col20a1	41.9521	0.550017	0.452156	1.21643	0.223821	0.528664
ENSMUSG00000016382	Pls3	3582.9	0.184967	0.0777512	2.37896	0.0173614	0.111254
ENSMUSG00000016386	Mpped2	2718.04	0.081517	0.094779	0.860074	0.389748	0.690006
ENSMUSG00000016409	Nkap	954.792	0.50397	0.284272	1.77284	0.0762544	0.287609
ENSMUSG00000016427	Ndufa1	714.044	-0.144172	0.198579	-0.726021	0.467826	0.749506
ENSMUSG00000016458	Wt1	14.4369	0.519459	0.596532	0.870799	0.383864	0.686129
ENSMUSG00000016477	E2f3	882.371	0.182774	0.140321	1.30254	0.192731	0.486887
ENSMUSG00000016481	Cr1l	438.456	0.191397	0.146925	1.30268	0.192684	0.486882
ENSMUSG00000016487	Ppfibp1	1056.22	0.170357	0.179806	0.947445	0.343412	0.652077
ENSMUSG00000016493	Cd46	89.5452	0.704905	0.279107	2.52557	0.011551	0.0838093
ENSMUSG00000016494	Cd34	106.854	0.733625	0.310391	2.36356	0.0181005	0.114432
ENSMUSG00000016495	Plgrkt	331.222	-0.0812786	0.187591	-0.433275	0.664815	0.871525
ENSMUSG00000016496	Cd274	51.5116	0.318096	0.296087	1.07433	0.282673	0.597105
ENSMUSG00000016503	Gtf3a	1155.73	-0.0477851	0.12405	-0.385208	0.700083	0.889881
ENSMUSG00000016510	Mtif3	405.24	-0.0118596	0.186107	-0.0637249	0.949189	0.98583
ENSMUSG00000016520	Lnx2	280.256	-0.0928485	0.207436	-0.4476	0.654442	0.867207
ENSMUSG00000016526	Dyrk3	299.372	0.0685444	0.200122	0.342514	0.731964	0.903376
ENSMUSG00000016528	Mapkapk2	756.18	-0.267245	0.146873	-1.81957	0.0688246	0.270653
ENSMUSG00000016534	Lamp2	2557.12	-0.235004	0.101011	-2.32653	0.0199904	0.122491
ENSMUSG00000016541	Atxn10	10139.1	0.0943601	0.0686729	1.37405	0.169426	0.452267
ENSMUSG00000016552	Foxred2	890.339	-0.269218	0.132959	-2.02482	0.0428863	0.201829
ENSMUSG00000016554	Eif3d	2909.67	-0.144196	0.136581	-1.05576	0.291079	0.60471
ENSMUSG00000016559	H3f3b	8661.97	-0.0215563	0.087992	-0.24498	0.806472	0.936308
ENSMUSG00000016619	Nup50	1374.19	0.0597452	0.0856868	0.697251	0.485646	0.763987
ENSMUSG00000016624	Phf21b	38.2614	-0.668786	0.834994	-0.800947	0.423162	0.717302
ENSMUSG00000016637	Ift27	461.365	-0.462148	0.205194	-2.25225	0.0243063	0.137591
ENSMUSG00000016664	Pacsin2	817.115	0.112207	0.159817	0.702097	0.482618	0.76138
ENSMUSG00000016756	Cmah	66.814	0.224372	0.290994	0.771052	0.440676	0.730498
ENSMUSG00000016757	Ttll12	2181.8	-0.143158	0.0948808	-1.50882	0.131345	0.394079
ENSMUSG00000016763	Scube1	1273.43	-0.416316	0.120304	-3.46053	0.000539111	0.00876545
ENSMUSG00000016831	Tox4	2621.17	0.0813763	0.100523	0.809532	0.418209	0.713428
ENSMUSG00000016833	Mrps18c	353.874	-0.279131	0.182155	-1.53238	0.125428	0.383336
ENSMUSG00000016918	Sulf1	82.4737	0.882548	0.547634	1.61157	0.107056	0.350936
ENSMUSG00000016921	Srsf6	2230.24	0.0580507	0.0895472	0.648269	0.516811	0.786841
ENSMUSG00000016933	Plcg1	2906.81	0.0580965	0.118002	0.492334	0.622483	0.850531
ENSMUSG00000016940	Kctd2	1151.25	-0.0465943	0.119836	-0.388817	0.697411	0.889165
ENSMUSG00000016942	Tmprss6	5.44059	-0.119991	1.67145	-0.0717881	0.942771	NA
ENSMUSG00000016946	Kctd5	1624.38	-0.27134	0.0981245	-2.76527	0.00568765	0.0509637
ENSMUSG00000016982	Pom121l2	5.25679	1.47444	1.07289	1.37427	0.169359	NA
ENSMUSG00000016984	Etaa1	299.592	0.107276	0.155151	0.691429	0.489296	0.766493
ENSMUSG00000016995	Matn4	87.0437	2.84837	0.321324	8.86448	7.68595e-19	5.72764e-16
ENSMUSG00000017002	Slpi	1.5726	1.35343	1.73622	0.779528	0.435669	NA
ENSMUSG00000017007	Rbpjl	7.90133	2.99514	1.0052	2.97965	0.00288576	0.0310354
ENSMUSG00000017009	Sdc4	535.651	-0.35483	0.156729	-2.26397	0.023576	0.135062
ENSMUSG00000017057	Il13ra1	49.1925	0.611855	0.322992	1.89433	0.0581808	0.243997
ENSMUSG00000017119	Nbr1	3915.74	0.119783	0.126106	0.949863	0.342182	0.651804
ENSMUSG00000017132	Cyth1	1355.89	0.211885	0.146043	1.45084	0.146825	0.417558
ENSMUSG00000017144	Rnd3	628.7	0.0292266	0.125764	0.232392	0.816233	0.94026
ENSMUSG00000017146	Brca1	66.2016	0.509563	0.533332	0.955432	0.339359	0.6494
ENSMUSG00000017165	Gast	0.948582	-0.948406	2.2866	-0.414767	0.678313	NA
ENSMUSG00000017167	Cntnap1	808.904	0.177141	0.114144	1.55191	0.120684	0.374989
ENSMUSG00000017176	Nt5c3b	973.559	-0.533128	0.105457	-5.05539	4.29503e-07	2.38561e-05
ENSMUSG00000017188	Coa3	1367.64	-0.293206	0.162235	-1.8073	0.0707162	0.275247
ENSMUSG00000017195	Zpbp2	1.33155	0.767061	1.82557	0.420175	0.674357	NA
ENSMUSG00000017204	Gsdma	0.40211	1.77658	3.29553	0.539087	0.589827	NA
ENSMUSG00000017210	Med24	1955.35	0.0289492	0.100867	0.287005	0.774108	0.923528
ENSMUSG00000017211	Gsdma2	1.31077	-0.148447	2.02094	-0.0734544	0.941445	NA
ENSMUSG00000017221	Psmd3	3920.75	-0.182226	0.0971177	-1.87634	0.060608	0.250688
ENSMUSG00000017264	Exosc10	1747.97	-0.0706152	0.127851	-0.552323	0.580727	0.827984
ENSMUSG00000017286	Glod4	1409.12	-0.102319	0.170312	-0.600772	0.547992	0.807569
ENSMUSG00000017288	Vps53	1941.65	0.0208898	0.136305	0.153258	0.878195	0.963968
ENSMUSG00000017291	Taok1	4680.48	0.0592487	0.204993	0.289028	0.77256	0.923472
ENSMUSG00000017299	Dnttip1	461.766	-0.169691	0.193307	-0.877832	0.380035	0.683589
ENSMUSG00000017300	Tnnc2	0.828461	1.73844	2.74845	0.632516	0.52705	NA
ENSMUSG00000017307	Acot8	297.934	-0.213764	0.151477	-1.4112	0.158187	0.4357
ENSMUSG00000017309	Cd300lg	2.65957	-1.7292	1.27465	-1.35661	0.174905	NA
ENSMUSG00000017310	Spint4	1.74066	-0.0253953	1.71671	-0.014793	0.988197	NA
ENSMUSG00000017314	Mpp2	3120.07	-0.140297	0.104471	-1.34294	0.179293	0.467438
ENSMUSG00000017344	Vtn	3.71473	1.06752	1.24789	0.855456	0.392299	NA
ENSMUSG00000017376	Nlk	2444.72	0.214789	0.0938769	2.28798	0.0221387	0.130345
ENSMUSG00000017386	Traf4	1364.72	-0.12897	0.124612	-1.03497	0.300681	0.613961
ENSMUSG00000017390	Aldoc	5945.1	-1.24305	0.134425	-9.24714	2.30571e-20	2.29098e-17
ENSMUSG00000017400	Stac2	556.706	-0.511806	0.269743	-1.89738	0.0577776	0.243266
ENSMUSG00000017404	Rpl19	6068.39	-0.235949	0.132551	-1.78006	0.0750669	0.285411
ENSMUSG00000017405	Nek8	138.02	-0.479393	0.231311	-2.07251	0.038218	0.187386
ENSMUSG00000017412	Cacnb4	3406.11	0.932745	0.286207	3.25899	0.00111809	0.0154061
ENSMUSG00000017417	Plxdc1	84.5499	-0.165885	0.242892	-0.68296	0.494632	0.770324
ENSMUSG00000017418	Arl5b	1337.12	0.361955	0.208884	1.7328	0.0831307	0.302027
ENSMUSG00000017421	Zfp207	2760.71	0.0675172	0.0931113	0.725124	0.468376	0.749947
ENSMUSG00000017428	Psmd11	2243.31	0.0482608	0.0850671	0.567326	0.570493	0.821993
ENSMUSG00000017446	C1qtnf1	117.985	-0.100116	0.608257	-0.164595	0.869263	0.960872
ENSMUSG00000017453	Pipox	41.4375	-0.175546	0.457239	-0.383927	0.701033	0.889926
ENSMUSG00000017466	Timp2	13262.8	-0.277112	0.0858275	-3.22871	0.00124349	0.0166231
ENSMUSG00000017478	Zc3h18	970.882	-0.0979025	0.196601	-0.497977	0.6185	0.848725
ENSMUSG00000017485	Top2b	8117.78	0.131956	0.129521	1.0188	0.308298	0.620586
ENSMUSG00000017491	Rarb	113.513	-0.449075	0.21411	-2.09741	0.0359577	0.180192
ENSMUSG00000017493	Igfbp4	1088.89	0.129851	0.173836	0.746974	0.455079	0.739715
ENSMUSG00000017499	Cdc6	22.2375	0.688404	0.513397	1.34088	0.179959	0.468224
ENSMUSG00000017548	Suz12	1320.67	0.359526	0.251245	1.43098	0.152437	0.427104
ENSMUSG00000017550	Atad5	209.818	0.299869	0.198198	1.51298	0.130285	0.392384
ENSMUSG00000017561	Crlf3	192.203	-0.190777	0.357943	-0.532981	0.594047	0.836012
ENSMUSG00000017607	Tns4	6.10492	-0.550608	1.1545	-0.476924	0.633416	NA
ENSMUSG00000017615	Tnfaip1	2281.77	-0.0569654	0.0950318	-0.599435	0.548883	0.808098
ENSMUSG00000017631	Abr	10819.6	-0.0436408	0.0793533	-0.549955	0.58235	0.82918
ENSMUSG00000017639	Rab11fip4	7926.69	0.0384	0.0887847	0.432506	0.665373	0.871742
ENSMUSG00000017652	Cd40	10.9438	3.04686	0.943795	3.22831	0.00124524	0.0166244
ENSMUSG00000017664	Slc35c2	1354.13	-0.360649	0.111329	-3.23948	0.00119749	0.0161396
ENSMUSG00000017667	Zfp334	875.408	-0.219409	0.12889	-1.70229	0.0887013	0.314517
ENSMUSG00000017670	Elmo2	2785.81	-0.251899	0.0832949	-3.02418	0.0024931	0.0278856
ENSMUSG00000017677	Wsb1	1807.75	0.255651	0.146026	1.75073	0.0799932	0.295606
ENSMUSG00000017679	Ttpal	1707.45	-0.0785322	0.103348	-0.75988	0.447326	0.734658
ENSMUSG00000017686	Rhot1	2591.6	0.0850232	0.0896343	0.948556	0.342846	0.651843
ENSMUSG00000017692	Rhbdl3	559.057	0.160691	0.17871	0.899172	0.368561	0.675173
ENSMUSG00000017697	Ada	97.0229	-0.157957	0.240054	-0.658007	0.510534	0.782023
ENSMUSG00000017707	Serinc3	7344.41	0.107186	0.106158	1.00969	0.312645	0.624403
ENSMUSG00000017713	Tha1	63.7985	-0.195171	0.334577	-0.583336	0.559667	0.81664
ENSMUSG00000017715	Pgs1	1689.61	-0.351648	0.113772	-3.09082	0.00199605	0.0238314
ENSMUSG00000017716	Birc5	73.2407	1.00623	0.281673	3.57233	0.000353821	0.00632176
ENSMUSG00000017718	Afmid	80.802	-0.557941	0.327537	-1.70344	0.0884854	0.314187
ENSMUSG00000017720	Trp53tg5	0.692029	-2.08352	2.87472	-0.724771	0.468592	NA
ENSMUSG00000017721	Pigt	3499.29	-0.0611508	0.113937	-0.536709	0.591469	0.834655
ENSMUSG00000017723	Wfdc2	6.72505	2.68916	1.28089	2.09945	0.0357773	NA
ENSMUSG00000017724	Etv4	352.449	-0.0554599	0.226156	-0.245228	0.80628	0.936308
ENSMUSG00000017734	Dbndd2	920.198	-0.0185698	0.172729	-0.107509	0.914386	0.976404
ENSMUSG00000017737	Mmp9	116.617	0.0366347	0.20659	0.17733	0.859249	0.957835
ENSMUSG00000017740	Slc12a5	9043.26	-0.112173	0.103449	-1.08432	0.278221	0.591872
ENSMUSG00000017747	Ghdc	167.603	-0.159794	0.328118	-0.487	0.626258	0.853056
ENSMUSG00000017754	Pltp	304.801	0.559424	0.216619	2.58253	0.00980785	0.0755441
ENSMUSG00000017756	Slc12a7	327.355	-0.414831	0.350635	-1.18308	0.236776	0.545361
ENSMUSG00000017760	Ctsa	1668.32	-0.361243	0.0907175	-3.98207	6.83182e-05	0.00169704
ENSMUSG00000017764	Zswim1	760.534	-0.0676011	0.106782	-0.633076	0.526684	0.793462
ENSMUSG00000017765	Slc12a4	770.033	-0.561392	0.205826	-2.72751	0.0063815	0.0552703
ENSMUSG00000017774	Myo1c	633.345	0.0460717	0.187509	0.245705	0.805911	0.936308
ENSMUSG00000017776	Crk	4035.62	-0.310282	0.0768579	-4.03708	5.41195e-05	0.00140549
ENSMUSG00000017778	Cox7c	1200.3	-0.187453	0.166911	-1.12307	0.261406	0.573641
ENSMUSG00000017781	Pitpna	9439.12	-0.0505317	0.0835728	-0.604643	0.545416	0.805627
ENSMUSG00000017801	Mlx	851.491	-0.222345	0.148723	-1.49502	0.134908	0.399476
ENSMUSG00000017802	Retreg3	2464.72	-0.0653229	0.101384	-0.644314	0.519372	0.788202
ENSMUSG00000017817	Jph2	24.6876	1.78056	0.499547	3.56436	0.00036475	0.00649109
ENSMUSG00000017830	Dhx58	12.7111	-1.03839	0.681503	-1.52367	0.12759	0.387625
ENSMUSG00000017831	Rab5a	3792.44	0.00162176	0.0868493	0.0186733	0.985102	0.995173
ENSMUSG00000017832	Hspb9	1.42474	0.443933	2.14743	0.206728	0.836222	NA
ENSMUSG00000017837	Nkiras2	1301.03	-0.27982	0.135089	-2.07138	0.0383234	0.187682
ENSMUSG00000017843	Ppp2r5c	5085.36	-0.42793	0.112406	-3.80701	0.000140655	0.00307034
ENSMUSG00000017858	Ift52	575.432	0.528218	0.234444	2.25307	0.024255	0.137472
ENSMUSG00000017861	Mybl2	49.4538	0.673305	0.387634	1.73696	0.0823941	0.30075
ENSMUSG00000017868	Sgk2	2.05172	2.04506	1.7808	1.1484	0.250805	NA
ENSMUSG00000017897	Eya2	63.7645	-0.0807276	0.455385	-0.177273	0.859294	0.957835
ENSMUSG00000017929	B4galt5	2281.92	-0.0829678	0.113387	-0.731724	0.464337	0.74747
ENSMUSG00000017943	Gdap1l1	2455.05	-0.37543	0.134322	-2.79499	0.00519007	0.0475861
ENSMUSG00000017969	Ptgis	33.6	1.41739	0.397798	3.56309	0.000366508	0.00651591
ENSMUSG00000017978	Cadps2	649.566	0.00934199	0.114787	0.0813855	0.935135	0.983791
ENSMUSG00000017999	Ddx27	1057.37	-0.158891	0.204897	-0.775465	0.438065	0.728531
ENSMUSG00000018001	Cyth3	1931.71	-0.0680488	0.167838	-0.405444	0.685151	0.881587
ENSMUSG00000018008	Cyth4	12.0321	-0.670125	0.782525	-0.856362	0.391798	0.691669
ENSMUSG00000018012	Rac3	5134.82	-0.482608	0.132324	-3.64717	0.000265145	0.00505375
ENSMUSG00000018040	Rrp7a	2304.84	-0.0589269	0.108033	-0.545452	0.585443	0.830872
ENSMUSG00000018042	Cyb5r3	3624.72	-0.152437	0.10187	-1.49639	0.134552	0.398884
ENSMUSG00000018068	Ints2	873.5	0.270182	0.220595	1.22479	0.220655	0.525115
ENSMUSG00000018076	Med13l	2634.58	-0.0066584	0.163752	-0.0406615	0.967566	0.990152
ENSMUSG00000018102	H2bc4	412.674	1.23163	0.200302	6.1489	7.80242e-10	9.24148e-08
ENSMUSG00000018126	Baiap2l2	231.664	-0.316631	0.217935	-1.45287	0.146261	0.416873
ENSMUSG00000018143	Mafk	314.169	0.333009	0.173284	1.92176	0.0546366	0.235464
ENSMUSG00000018160	Med1	1678.08	0.313249	0.251598	1.24504	0.213118	0.516223
ENSMUSG00000018166	Erbb3	14.2943	0.442941	0.56194	0.788236	0.430559	0.722513
ENSMUSG00000018167	Stard3	525.664	-0.594441	0.159466	-3.7277	0.000193239	0.00393183
ENSMUSG00000018168	Ikzf3	1.69358	0.67088	1.98432	0.338091	0.735295	NA
ENSMUSG00000018169	Mfng	36.5384	0.61078	0.495043	1.23379	0.217281	0.521594
ENSMUSG00000018171	Vmp1	2675.41	0.363704	0.0957856	3.79707	0.000146419	0.00316651
ENSMUSG00000018189	Uchl5	807.727	-0.144797	0.198113	-0.730877	0.464854	0.747682
ENSMUSG00000018196	Glrx2	1795.86	-0.0255198	0.148425	-0.171937	0.863487	0.959033
ENSMUSG00000018199	Ro60	2262.56	0.1078	0.180441	0.597426	0.550223	0.809138
ENSMUSG00000018209	Stk4	1786.13	-0.0181126	0.175099	-0.103442	0.917612	0.977631
ENSMUSG00000018217	Pmp22	526.776	-0.185216	0.190995	-0.969745	0.332174	0.642791
ENSMUSG00000018238	Gdf9	29.6632	0.32444	0.42667	0.760399	0.447016	0.734516
ENSMUSG00000018239	Zcchc10	145.932	-0.398381	0.304047	-1.31026	0.190108	0.482897
ENSMUSG00000018263	Tbx5	4.19532	1.27682	1.07809	1.18434	0.23628	NA
ENSMUSG00000018286	Psmb6	2424.53	-0.221228	0.132568	-1.66879	0.0951599	0.328122
ENSMUSG00000018287	Spag7	995.083	-0.084466	0.181658	-0.464972	0.641952	0.861701
ENSMUSG00000018293	Pfn1	2556.95	-0.267977	0.123047	-2.17784	0.0294178	0.157197
ENSMUSG00000018322	Tomm34	1067.86	-0.183171	0.106865	-1.71404	0.0865216	0.30955
ENSMUSG00000018326	Ywhab	19054	0.0763112	0.0796851	0.95766	0.338234	0.648507
ENSMUSG00000018334	Ksr1	1225.39	-0.109431	0.185776	-0.589047	0.55583	0.81323
ENSMUSG00000018339	Gpx3	342.245	1.03323	0.173019	5.97178	2.34679e-09	2.39842e-07
ENSMUSG00000018340	Anxa6	1046.95	-0.193941	0.114725	-1.69048	0.0909359	0.318793
ENSMUSG00000018341	Il12rb2	5.32554	-0.0497861	0.878034	-0.0567018	0.954783	NA
ENSMUSG00000018347	Zkscan6	216.585	-0.133266	0.174551	-0.763477	0.445179	0.733557
ENSMUSG00000018362	Kpna2	1887.86	0.38633	0.137819	2.80316	0.00506044	0.0466426
ENSMUSG00000018363	Smurf2	1162.03	0.127387	0.142134	0.89625	0.370119	0.676321
ENSMUSG00000018372	Cep95	146.235	-0.26684	0.41861	-0.637442	0.523837	0.791955
ENSMUSG00000018377	Vezf1	923.711	0.21443	0.0977128	2.1945	0.0281998	0.15234
ENSMUSG00000018378	2210416O15Rik	1064.82	-0.177564	0.263753	-0.673223	0.500805	0.774685
ENSMUSG00000018379	Srsf1	3463.23	0.0392607	0.129213	0.303845	0.761246	0.917692
ENSMUSG00000018387	Shroom1	168.166	-0.604867	1.1149	-0.542528	0.587455	0.832042
ENSMUSG00000018395	Kif3a	5238.11	-0.325533	0.124857	-2.60724	0.00912755	0.0719464
ENSMUSG00000018398	Septin8	3086.3	-0.395474	0.113038	-3.49859	0.000467725	0.00783787
ENSMUSG00000018401	Mtmr4	2790.36	-0.59541	0.113371	-5.25189	1.50545e-07	9.61608e-06
ENSMUSG00000018405	Mrm1	736.43	-0.244797	0.280512	-0.87268	0.382838	0.68539
ENSMUSG00000018411	Mapt	52028.7	0.0545129	0.102016	0.534358	0.593094	0.83566
ENSMUSG00000018412	Kansl1	2447.98	0.0496418	0.0906127	0.547845	0.583798	0.82992
ENSMUSG00000018415	Gid4	2175.7	-0.0648116	0.0983138	-0.659232	0.509747	0.78141
ENSMUSG00000018417	Myo1b	989.101	0.176513	0.165304	1.06781	0.285608	0.599332
ENSMUSG00000018425	Dhx40	616.583	0.144493	0.242907	0.59485	0.551944	0.810336
ENSMUSG00000018427	Ypel2	594.936	-0.314875	0.132441	-2.37747	0.0174318	0.111505
ENSMUSG00000018428	Akap1	1530.15	-0.151105	0.107566	-1.40476	0.160091	0.438205
ENSMUSG00000018433	Nol11	865.338	-0.0331354	0.102517	-0.323219	0.746529	0.909824
ENSMUSG00000018442	Derl2	1162.91	-0.20241	0.149126	-1.35731	0.174683	0.460662
ENSMUSG00000018446	C1qbp	1563.61	-0.0261877	0.132742	-0.197283	0.843606	0.952338
ENSMUSG00000018449	Rpain	176.029	-8.31665e-05	0.239259	-0.000347601	0.999723	0.999946
ENSMUSG00000018451	6330403K07Rik	4111.88	0.528561	0.0874328	6.04534	1.49095e-09	1.59675e-07
ENSMUSG00000018459	Slc13a3	257.747	-0.945314	0.325967	-2.90003	0.0037313	0.0374281
ENSMUSG00000018470	Kcnab3	98.0832	-1.00768	0.283171	-3.55855	0.000372912	0.00659696
ENSMUSG00000018474	Chd3	16852.8	0.134091	0.0976731	1.37286	0.169797	0.45285
ENSMUSG00000018476	Kdm6b	2437.65	0.0197326	0.130023	0.151762	0.879375	0.964188
ENSMUSG00000018479	1700125H20Rik	14.0711	-0.0492795	0.628484	-0.0784101	0.937502	0.983791
ENSMUSG00000018481	Appbp2	4425.13	0.189622	0.123105	1.54033	0.123479	0.380108
ENSMUSG00000018486	Wnt9b	1.75391	-0.192473	1.66558	-0.115559	0.908002	NA
ENSMUSG00000018500	Adora2b	61.676	-1.03235	0.305726	-3.37672	0.000733553	0.0112133
ENSMUSG00000018501	Ncor1	7499.63	-0.0730762	0.167122	-0.437263	0.661921	0.87041
ENSMUSG00000018507	Trpv2	745.286	0.315278	0.181634	1.73578	0.0826021	0.301149
ENSMUSG00000018509	Cenpv	526.79	-0.144732	0.174856	-0.827721	0.407829	0.704395
ENSMUSG00000018537	Pcgf2	682.794	-0.134149	0.129409	-1.03663	0.299907	0.613345
ENSMUSG00000018541	Cwc25	525.7	0.146332	0.11647	1.2564	0.208972	0.510163
ENSMUSG00000018543	1700001P01Rik	1.10385	1.9873	2.15892	0.920504	0.357309	NA
ENSMUSG00000018547	Pip4k2b	8412.18	0.0887252	0.0961509	0.92277	0.356127	0.664868
ENSMUSG00000018548	Trim37	10117.9	0.208063	0.0989073	2.10361	0.035412	0.178445
ENSMUSG00000018554	Ybx2	154.048	-0.83885	0.276325	-3.03574	0.00239945	0.0272644
ENSMUSG00000018559	Ctdnep1	1985.38	-0.168973	0.0938478	-1.80051	0.0717808	0.277999
ENSMUSG00000018565	Elp5	2006.9	-0.0486827	0.124435	-0.391229	0.695628	0.887904
ENSMUSG00000018566	Slc2a4	33.7282	-0.209037	0.715457	-0.292173	0.770154	0.922154
ENSMUSG00000018567	Gabarap	4062.08	-0.138631	0.107632	-1.288	0.197745	0.494362
ENSMUSG00000018569	Cldn7	2.79203	1.14419	1.31648	0.869126	0.384778	NA
ENSMUSG00000018570	2810408A11Rik	33.7837	0.429041	0.456122	0.940628	0.346896	0.656046
ENSMUSG00000018572	Phf23	897.213	0.00907146	0.106872	0.084882	0.932355	0.982974
ENSMUSG00000018574	Acadvl	1020.38	-0.17324	0.136993	-1.26459	0.206018	0.506069
ENSMUSG00000018581	Dnah11	9.07824	0.678583	0.919445	0.738036	0.460493	0.744456
ENSMUSG00000018583	G3bp1	3168.68	0.0488737	0.107626	0.454107	0.649752	0.86561
ENSMUSG00000018585	Atox1	967.248	-0.140412	0.155722	-0.90168	0.367227	0.674594
ENSMUSG00000018589	Glra2	1880.92	0.17697	0.0891831	1.98434	0.0472178	0.214851
ENSMUSG00000018593	Sparc	1708.8	-0.278061	0.20421	-1.36164	0.173312	0.458533
ENSMUSG00000018595	Glra4	0.629449	0.719064	2.95439	0.243388	0.807705	NA
ENSMUSG00000018599	Mief2	522.431	-0.0185702	0.23586	-0.078734	0.937244	0.983791
ENSMUSG00000018604	Tbx3	1.71405	-0.626743	2.22428	-0.281774	0.778117	NA
ENSMUSG00000018634	Crhr1	694.781	-0.195236	0.143016	-1.36513	0.172211	0.457174
ENSMUSG00000018648	Dusp14	544.633	0.254334	0.148733	1.71001	0.0872641	0.310907
ENSMUSG00000018651	Tada2a	629.496	-0.00611633	0.176569	-0.03464	0.972367	0.991136
ENSMUSG00000018654	Ikzf1	0.855939	1.37031	2.73472	0.501079	0.616316	NA
ENSMUSG00000018659	Pnpo	810.785	-0.398615	0.125694	-3.1713	0.00151757	0.019318
ENSMUSG00000018661	Cog1	1171.42	-0.296074	0.158507	-1.86789	0.0617775	0.253298
ENSMUSG00000018666	Cbx1	1509.75	-0.0423606	0.106245	-0.398706	0.69011	0.884142
ENSMUSG00000018669	Cdk5rap3	1185.75	0.0708627	0.159799	0.443449	0.657441	0.868928
ENSMUSG00000018672	Copz2	65.6172	-0.710444	0.341259	-2.08183	0.0373581	0.185086
ENSMUSG00000018677	Slc25a39	2526.31	-0.199054	0.131171	-1.51752	0.129137	0.390163
ENSMUSG00000018678	Sp2	271.679	-0.104901	0.14973	-0.700603	0.483551	0.762233
ENSMUSG00000018697	Aatf	553.92	-0.167005	0.137124	-1.21791	0.22326	0.528175
ENSMUSG00000018698	Lhx1	19.829	-1.25138	0.787397	-1.58927	0.112	0.360256
ENSMUSG00000018707	Dync1h1	26902.4	-0.316578	0.121045	-2.61538	0.0089129	0.0707533
ENSMUSG00000018727	Cpsf4l	8.12065	-0.127269	0.783745	-0.162385	0.871003	0.961538
ENSMUSG00000018733	Pex12	276.466	0.0388858	0.228958	0.169839	0.865137	0.959434
ENSMUSG00000018736	Ndel1	2856.58	0.0655722	0.0951353	0.689252	0.490665	0.767226
ENSMUSG00000018740	Slc25a35	72.1051	-0.314788	0.311566	-1.01034	0.312332	0.62414
ENSMUSG00000018750	Zbtb4	1981.79	-0.0288551	0.143799	-0.200663	0.840962	0.951034
ENSMUSG00000018752	Tnfsfm13	13.2853	0.966255	0.885938	1.09066	0.275424	0.589523
ENSMUSG00000018761	Mpdu1	1416.95	-0.115435	0.116348	-0.992156	0.321121	0.633294
ENSMUSG00000018765	Fxr2	2628.47	-0.138816	0.0872649	-1.59074	0.111667	0.359895
ENSMUSG00000018770	Atp5g3	5173.33	-0.0702877	0.13375	-0.525517	0.599224	0.83915
ENSMUSG00000018774	Cd68	28.1767	0.111041	0.513652	0.216179	0.828848	0.94637
ENSMUSG00000018776	Slc35g3	6.8984	0.127702	0.815923	0.156512	0.87563	NA
ENSMUSG00000018796	Acsl1	1677.05	-0.0176488	0.234323	-0.0753181	0.939962	0.98455
ENSMUSG00000018800	Abca5	1422.35	0.0815319	0.263716	0.309166	0.757195	0.915153
ENSMUSG00000018809	Smyd4	388.188	0.240681	0.245633	0.97984	0.327165	0.638375
ENSMUSG00000018819	Lsp1	61.1314	0.0205032	0.476349	0.0430423	0.965668	0.989584
ENSMUSG00000018820	Zfyve27	2840.4	-0.124775	0.0821373	-1.5191	0.128737	0.389786
ENSMUSG00000018821	Avpi1	332.68	0.251603	0.149546	1.68245	0.0924821	0.321986
ENSMUSG00000018822	Sfrp5	2.18328	3.13292	1.76765	1.77236	0.0763352	NA
ENSMUSG00000018830	Myh11	27.6388	0.743624	0.469654	1.58334	0.113343	0.361924
ENSMUSG00000018841	Rad51d	262.936	-0.463787	0.172023	-2.69608	0.00701611	0.059008
ENSMUSG00000018844	Fndc8	17.8905	0.982075	0.524539	1.87226	0.0611706	0.251709
ENSMUSG00000018845	Unc45b	22.8584	0.740809	0.65476	1.13142	0.257878	0.569566
ENSMUSG00000018846	Pank3	4029.3	-0.188981	0.189704	-0.996191	0.319157	0.63122
ENSMUSG00000018848	Rars	1779.07	0.209503	0.135674	1.54416	0.122549	0.378807
ENSMUSG00000018849	Wwc1	3739.28	0.206248	0.190213	1.0843	0.278231	0.591872
ENSMUSG00000018858	Mrpl58	653.286	-0.109287	0.138174	-0.79094	0.428979	0.721894
ENSMUSG00000018861	Fdxr	212.277	-0.0862537	0.203424	-0.424009	0.671559	0.875489
ENSMUSG00000018862	Otop3	5.86725	1.05821	0.937671	1.12856	0.259085	NA
ENSMUSG00000018865	Sult4a1	7274.28	-0.0784814	0.100833	-0.778331	0.436374	0.727154
ENSMUSG00000018882	Mrpl45	838.958	-0.0509721	0.145606	-0.35007	0.726286	0.900932
ENSMUSG00000018893	Mb	4.88219	1.51804	1.41802	1.07054	0.284377	NA
ENSMUSG00000018899	Irf1	78.383	0.0716731	0.300818	0.238261	0.811679	0.937818
ENSMUSG00000018900	Slc22a5	483.166	0.0921382	0.137997	0.667685	0.504335	0.777358
ENSMUSG00000018906	P4ha2	473.958	-1.01003	0.203703	-4.95833	7.1101e-07	3.60238e-05
ENSMUSG00000018907	Alox12e	7.25871	0.149618	0.983549	0.15212	0.879092	NA
ENSMUSG00000018909	Arrb1	8923.64	-0.132472	0.119315	-1.11027	0.266883	0.580939
ENSMUSG00000018919	Tm4sf5	26.649	1.98825	0.463394	4.29063	1.78165e-05	0.000565981
ENSMUSG00000018920	Cxcl16	14.11	0.1483	0.69824	0.212392	0.831801	0.947444
ENSMUSG00000018921	Pelp1	1439.03	-0.0578299	0.0951402	-0.607839	0.543294	0.804639
ENSMUSG00000018923	Med11	323.871	-0.0918705	0.184182	-0.498803	0.617918	0.848286
ENSMUSG00000018924	Alox15	0.72436	1.06784	2.79399	0.382193	0.702319	NA
ENSMUSG00000018931	Natd1	979.093	-0.692271	0.31656	-2.18686	0.0287531	0.154486
ENSMUSG00000018932	Map2k3	381.546	-0.0468247	0.228695	-0.204747	0.83777	0.949661
ENSMUSG00000018965	Ywhah	14962	-0.00726144	0.102552	-0.0708073	0.943551	0.98555
ENSMUSG00000018973	Hoxb1	3.1598	-0.246777	1.10423	-0.223483	0.823159	NA
ENSMUSG00000018974	Sart3	689.842	0.362585	0.12737	2.84671	0.00441738	0.0423819
ENSMUSG00000018983	E2f2	31.1572	1.33957	0.672616	1.99158	0.0464173	0.212429
ENSMUSG00000018986	Slfn3	7.59363	1.72211	0.936451	1.83898	0.0659187	0.26312
ENSMUSG00000018995	Nars2	539.812	0.175722	0.215839	0.814135	0.415568	0.711578
ENSMUSG00000018999	Slc35b4	1296.47	-0.156144	0.0997284	-1.5657	0.11742	0.369127
ENSMUSG00000019027	Dnah1	117.433	1.3179	0.216694	6.08182	1.18825e-09	1.33659e-07
ENSMUSG00000019039	Dalrd3	1486.52	-0.257127	0.1218	-2.11107	0.0347667	0.176448
ENSMUSG00000019054	Fis1	1610.85	-0.16446	0.159736	-1.02957	0.303211	0.616101
ENSMUSG00000019055	Plod1	436.63	0.0879267	0.289519	0.303699	0.761357	0.917703
ENSMUSG00000019066	Rab3d	1543.47	-0.60406	0.165749	-3.64442	0.000267998	0.00509909
ENSMUSG00000019080	Mfsd3	211.435	-0.246246	0.196361	-1.25404	0.209827	0.511065
ENSMUSG00000019082	Slc25a22	9060.15	-0.398818	0.109356	-3.64699	0.000265332	0.00505375
ENSMUSG00000019087	Atp6ap1	11880.3	-0.152652	0.0952359	-1.60288	0.10896	0.354513
ENSMUSG00000019088	Dnase1l1	26.939	0.259691	0.537701	0.482966	0.62912	0.854481
ENSMUSG00000019102	Aldh3a1	23.3892	1.07404	0.47808	2.24657	0.0246673	0.139112
ENSMUSG00000019122	Ccl9	2.04731	-1.16133	1.3822	-0.840206	0.400793	NA
ENSMUSG00000019124	Scrn1	11204.5	0.00667005	0.0937181	0.0711715	0.943261	0.985468
ENSMUSG00000019132	BC005537	8716.48	0.195252	0.0781609	2.49808	0.0124868	0.0884462
ENSMUSG00000019139	Isyna1	505.2	-0.236459	0.197689	-1.19612	0.231651	0.539183
ENSMUSG00000019143	Hars2	527.017	0.3245	0.145841	2.22503	0.0260791	0.144136
ENSMUSG00000019146	Cacng2	1848.85	-0.0554062	0.109468	-0.506139	0.612759	0.846078
ENSMUSG00000019158	Tmem160	817.33	-0.34608	0.17185	-2.01385	0.0440253	0.204837
ENSMUSG00000019173	Rab5c	4238.31	-0.244063	0.10459	-2.33351	0.0196212	0.120883
ENSMUSG00000019178	Styxl1	2.67108	-0.353781	1.33066	-0.26587	0.790339	NA
ENSMUSG00000019179	Mdh2	7367.97	-0.257465	0.11018	-2.33677	0.019451	0.119959
ENSMUSG00000019188	H13	3602.53	-0.173188	0.111813	-1.5489	0.121405	0.376575
ENSMUSG00000019189	Rnf145	3124.18	-0.0146856	0.134193	-0.109437	0.912856	0.975877
ENSMUSG00000019194	Scn1b	1504.06	0.128618	0.183575	0.70063	0.483534	0.762233
ENSMUSG00000019210	Atp6v1e1	6089.82	0.225405	0.100934	2.23319	0.0255367	0.142193
ENSMUSG00000019214	Chtf18	50.5116	1.02899	0.462093	2.2268	0.0259604	0.143747
ENSMUSG00000019230	Lhx9	17.2665	-0.302005	0.714117	-0.422906	0.672364	0.875594
ENSMUSG00000019232	Etnppl	1.09936	0.677418	2.54698	0.265969	0.790263	NA
ENSMUSG00000019235	Rps6kl1	932.11	-0.0286085	0.116625	-0.245303	0.806222	0.936308
ENSMUSG00000019254	Ppp1r12c	1595.31	-0.0525434	0.118793	-0.442311	0.658264	0.869037
ENSMUSG00000019256	Ahr	464.064	0.448452	0.188683	2.37675	0.0174659	0.111643
ENSMUSG00000019261	Map1s	1778.27	-0.331866	0.217437	-1.52626	0.126945	0.386058
ENSMUSG00000019278	Dpep1	0.76522	1.81522	2.39673	0.757373	0.448827	NA
ENSMUSG00000019295	Tmem129	837.527	-0.0971961	0.160116	-0.607037	0.543826	0.804918
ENSMUSG00000019297	Nop9	732.041	0.471414	0.136092	3.46394	0.000532335	0.00867119
ENSMUSG00000019301	Hsd17b1	22.5558	1.21689	0.519355	2.34308	0.0191251	0.118603
ENSMUSG00000019302	Atp6v0a1	15049.7	-0.00206039	0.156954	-0.0131273	0.989526	0.996858
ENSMUSG00000019303	Psmc3ip	91.1372	0.316391	0.268744	1.1773	0.239077	0.547475
ENSMUSG00000019312	Grb7	15.0312	0.702148	0.722048	0.972439	0.330832	0.642168
ENSMUSG00000019320	Noxo1	51.6198	-1.96875	0.649172	-3.03271	0.00242372	0.0274182
ENSMUSG00000019326	Aoc3	0.760935	-0.641828	2.49485	-0.257261	0.796977	NA
ENSMUSG00000019338	Zfp687	609.275	-0.282204	0.26375	-1.06997	0.284633	0.598539
ENSMUSG00000019359	Gdpd2	259.792	-0.78332	0.310891	-2.5196	0.0117489	0.084969
ENSMUSG00000019362	D8Ertd738e	934.301	-0.226168	0.154279	-1.46597	0.142657	0.412032
ENSMUSG00000019368	Sec14l4	3.00114	0.754782	1.38337	0.545611	0.585334	NA
ENSMUSG00000019370	Calm3	43550.9	-0.0972232	0.107819	-0.901722	0.367205	0.674594
ENSMUSG00000019373	Cops3	1639.56	0.168708	0.174555	0.966499	0.333794	0.644142
ENSMUSG00000019428	Fkbp8	6173.81	-0.174228	0.168477	-1.03414	0.301071	0.614337
ENSMUSG00000019432	Ddx39b	4138.4	-0.120515	0.0911703	-1.32187	0.186211	0.477148
ENSMUSG00000019433	Gipc1	1126.32	-0.217074	0.144433	-1.50293	0.132856	0.396223
ENSMUSG00000019437	Tlcd1	235.668	-0.694544	0.19811	-3.50585	0.00045516	0.00766529
ENSMUSG00000019461	Plscr3	456.36	-0.0101755	0.171186	-0.0594414	0.952601	0.986581
ENSMUSG00000019464	Ptger1	81.4395	1.10671	0.791926	1.3975	0.162264	0.441638
ENSMUSG00000019467	Arhgef25	842.107	0.00798203	0.160578	0.0497082	0.960355	0.988335
ENSMUSG00000019470	Xab2	829.032	-0.303042	0.119858	-2.52834	0.0114603	0.0833096
ENSMUSG00000019471	Cdc37	3030.18	-0.294996	0.161128	-1.83082	0.0671278	0.26644
ENSMUSG00000019478	Rab4a	1351.88	-0.0850725	0.138686	-0.613417	0.5396	0.801693
ENSMUSG00000019487	Trip10	86.1502	-0.161766	0.42655	-0.379243	0.704508	0.890459
ENSMUSG00000019489	Cd70	1.14802	3.29755	2.36455	1.39458	0.163143	NA
ENSMUSG00000019494	Cops6	2247.55	-0.274392	0.107228	-2.55897	0.0104983	0.0785946
ENSMUSG00000019505	Ubb	28829.7	-0.191898	0.151228	-1.26893	0.204467	0.503844
ENSMUSG00000019518	Ap4m1	472.007	-0.00294488	0.151773	-0.0194032	0.984519	0.995068
ENSMUSG00000019528	Gyg	1793.91	-0.209778	0.0911193	-2.30223	0.0213222	0.127541
ENSMUSG00000019539	Rcn3	165.659	-0.468213	0.384364	-1.21815	0.223167	0.528025
ENSMUSG00000019558	Slc6a8	2497.33	-0.10112	0.109	-0.927702	0.353562	0.66235
ENSMUSG00000019564	Arid3a	147.243	0.0677425	0.19268	0.351581	0.725152	0.900287
ENSMUSG00000019577	Pdk4	123.907	-0.433522	0.496209	-0.873668	0.382299	0.685265
ENSMUSG00000019578	Ubxn6	1611.53	-0.107002	0.0963788	-1.11022	0.266904	0.580939
ENSMUSG00000019579	Mydgf	1391.86	-0.169332	0.153064	-1.10628	0.268606	0.58294
ENSMUSG00000019590	Cyb561	2013.69	-0.0580639	0.105782	-0.548901	0.583073	0.829676
ENSMUSG00000019647	Sema6a	2854.9	0.00418446	0.14576	0.028708	0.977098	0.992976
ENSMUSG00000019659	Ccdc12	374.374	-0.390299	0.169625	-2.30095	0.0213944	0.127802
ENSMUSG00000019689	Fmc1	346.929	-0.484995	0.14103	-3.43895	0.000583978	0.00934039
ENSMUSG00000019699	Akt3	8327.52	-0.754454	0.135899	-5.5516	2.83067e-08	2.26011e-06
ENSMUSG00000019710	Mrpl24	698.394	0.158909	0.159019	0.999309	0.317645	0.629795
ENSMUSG00000019715	Gle1	1845.81	0.130996	0.163783	0.799809	0.423821	0.71795
ENSMUSG00000019718	L3hypdh	61.3317	0.804376	0.409187	1.96579	0.0493226	0.220423
ENSMUSG00000019726	Lyst	793.839	-0.453814	0.784093	-0.578776	0.56274	0.816917
ENSMUSG00000019731	Slc35e1	2389.62	-0.111274	0.124849	-0.891272	0.372783	0.678944
ENSMUSG00000019732	Calr3	38.441	-0.154432	0.348666	-0.442923	0.657821	0.869037
ENSMUSG00000019734	Tmc4	53.4281	-0.0750982	0.362998	-0.206883	0.836101	0.948897
ENSMUSG00000019737	Syne4	19.4512	0.224247	0.601784	0.372637	0.709419	0.892889
ENSMUSG00000019738	Polr2i	356.751	-0.474574	0.208747	-2.27344	0.0229994	0.133277
ENSMUSG00000019756	Prl8a1	31.1707	0.407751	0.41689	0.978079	0.328035	0.639375
ENSMUSG00000019761	Krt10	141.241	0.184007	0.218247	0.843115	0.399164	0.697582
ENSMUSG00000019762	Iyd	90.2297	-0.869266	0.305914	-2.84153	0.00448969	0.0428485
ENSMUSG00000019763	Rmnd1	469.484	-0.14045	0.172547	-0.813978	0.415657	0.711651
ENSMUSG00000019767	Ccdc170	5.89961	1.42351	1.05144	1.35387	0.175777	NA
ENSMUSG00000019768	Esr1	162.598	-0.335068	0.23823	-1.40649	0.159579	0.437473
ENSMUSG00000019772	Vip	40.9846	-1.20358	0.416405	-2.8904	0.0038475	0.0382614
ENSMUSG00000019773	Fbxo5	39.2936	0.859224	0.51524	1.66762	0.0953915	0.328597
ENSMUSG00000019774	Mtrf1l	144.337	-0.385189	0.219901	-1.75165	0.0798338	0.295349
ENSMUSG00000019775	Rgs17	2697.24	0.142006	0.184363	0.770252	0.44115	0.730724
ENSMUSG00000019777	Hdac2	3870.56	-0.0204491	0.104773	-0.195175	0.845256	0.952818
ENSMUSG00000019779	Frk	14.134	-0.325733	0.718683	-0.453236	0.650379	0.865715
ENSMUSG00000019782	Rwdd1	915.205	-0.38652	0.157728	-2.45055	0.0142639	0.0966695
ENSMUSG00000019785	Clvs2	603.336	0.0881787	0.115773	0.76165	0.446269	0.734118
ENSMUSG00000019787	Trdn	12.2679	1.73982	1.02746	1.69332	0.0903949	0.317813
ENSMUSG00000019789	Hey2	44.821	-0.523939	0.322489	-1.62467	0.104233	0.345254
ENSMUSG00000019790	Stxbp5	2898.41	0.021372	0.18941	0.112835	0.910162	0.975479
ENSMUSG00000019791	Hint3	303.427	-0.238243	0.214073	-1.1129	0.265749	0.579272
ENSMUSG00000019792	Trmt11	126.233	0.0763851	0.296818	0.257346	0.796911	0.932772
ENSMUSG00000019794	Katna1	169.27	-0.0709241	0.258886	-0.273959	0.784116	0.928293
ENSMUSG00000019795	Pcmt1	3218.96	-0.304716	0.0978077	-3.11546	0.00183659	0.0223149
ENSMUSG00000019796	Lrp11	4772.29	-0.246392	0.0817142	-3.01529	0.00256736	0.0285201
ENSMUSG00000019797	Mtres1	399.341	0.0174587	0.141046	0.12378	0.90149	0.972487
ENSMUSG00000019802	Sec63	1902.93	-0.039589	0.137422	-0.288083	0.773283	0.923528
ENSMUSG00000019803	Nr2e1	357.931	-0.744044	0.189235	-3.93185	8.42957e-05	0.00201286
ENSMUSG00000019804	Snx3	3908.34	-0.0611677	0.109119	-0.560562	0.575096	0.82496
ENSMUSG00000019806	Aig1	1755.32	-0.264824	0.118939	-2.22655	0.0259772	0.143772
ENSMUSG00000019808	Adat2	175.553	0.0735267	0.17597	0.417836	0.676067	0.877326
ENSMUSG00000019809	Pex3	660.3	-0.00784301	0.13176	-0.0595251	0.952534	0.986569
ENSMUSG00000019810	Fuca2	1240.08	0.0650827	0.106119	0.613297	0.53968	0.801693
[truncated: 24,683 more rows]

## Sheet: Lucif_v_Ehmt1-sh2
	GeneSymbol	baseMean	log2FoldChange	lfcSE	stat	pvalue	padj
ENSMUSG00000000001	Gnai3	2864.1	0.266023	0.0945561	2.81339	0.00490228	0.0427774
ENSMUSG00000000028	Cdc45	63.5507	-0.217753	0.348767	-0.62435	0.532398	0.777192
ENSMUSG00000000031	H19	25.011	0.108641	0.517916	0.209766	0.83385	0.941086
ENSMUSG00000000037	Scml2	64.3418	-0.113415	0.424639	-0.267086	0.789403	0.920137
ENSMUSG00000000049	Apoh	2.35519	-0.363149	1.44886	-0.250645	0.802088	NA
ENSMUSG00000000056	Narf	3277.79	-0.162314	0.127558	-1.27247	0.203205	0.484538
ENSMUSG00000000058	Cav2	717.02	-0.124731	0.175754	-0.709687	0.477898	0.744259
ENSMUSG00000000078	Klf6	3025.88	0.356814	0.133637	2.67003	0.00758455	0.0584214
ENSMUSG00000000085	Scmh1	1374.01	0.38094	0.124845	3.05129	0.00227857	0.0245858
ENSMUSG00000000088	Cox5a	2747.02	-0.322005	0.1196	-2.69236	0.00709488	0.0558175
ENSMUSG00000000093	Tbx2	2.14514	0.561372	1.39907	0.401246	0.688239	NA
ENSMUSG00000000120	Ngfr	48.4846	0.121731	0.376187	0.323593	0.746246	0.898892
ENSMUSG00000000125	Wnt3	77.785	-0.0742985	0.249973	-0.297227	0.766293	0.909133
ENSMUSG00000000126	Wnt9a	343.86	-0.0715943	0.154395	-0.463708	0.642857	0.845446
ENSMUSG00000000127	Fer	691.126	-0.187604	0.13931	-1.34666	0.178088	0.452264
ENSMUSG00000000131	Xpo6	2466.55	-0.0326349	0.104257	-0.313024	0.754263	0.903203
ENSMUSG00000000134	Tfe3	916.317	-0.106061	0.138193	-0.767482	0.442795	0.716489
ENSMUSG00000000142	Axin2	331.333	-0.286249	0.202787	-1.41158	0.158075	0.421999
ENSMUSG00000000148	Brat1	807.079	0.291362	0.11933	2.44164	0.0146208	0.0923515
ENSMUSG00000000149	Gna12	3117.63	0.189534	0.096214	1.96992	0.0488475	0.207405
ENSMUSG00000000154	Slc22a18	1.74409	0.888546	1.68535	0.527217	0.598043	NA
ENSMUSG00000000167	Pih1d2	24.9596	-0.582984	0.43385	-1.34375	0.17903	0.453782
ENSMUSG00000000168	Dlat	2506.27	0.0309419	0.0963595	0.321109	0.748128	0.899994
ENSMUSG00000000171	Sdhd	2418	-0.0322512	0.126661	-0.254626	0.799012	0.924643
ENSMUSG00000000182	Fgf23	6.93248	0.406429	0.839478	0.484145	0.628283	NA
ENSMUSG00000000184	Ccnd2	8402.94	-0.538342	0.208399	-2.58323	0.00978813	0.0698856
ENSMUSG00000000194	Gpr107	2625.74	0.0687874	0.127104	0.541192	0.588375	0.814108
ENSMUSG00000000197	Nalcn	2476.12	0.0581885	0.118229	0.492169	0.6226	0.835154
ENSMUSG00000000202	Btbd17	284.991	-0.526218	0.196931	-2.6721	0.00753786	0.0581466
ENSMUSG00000000204	Slfn4	0.920506	0.204912	2.39042	0.0857221	0.931687	NA
ENSMUSG00000000214	Th	8.95616	0.0109347	0.753124	0.0145192	0.988416	NA
ENSMUSG00000000223	Drp2	1193.87	-0.302824	0.124865	-2.4252	0.0152998	0.0953843
ENSMUSG00000000244	Tspan32	2.06704	-0.79016	2.01595	-0.391954	0.695092	NA
ENSMUSG00000000247	Lhx2	3750.18	-0.126876	0.170646	-0.743506	0.457176	0.728829
ENSMUSG00000000253	Gmpr	348.193	-0.254037	0.187851	-1.35233	0.17627	0.449738
ENSMUSG00000000263	Glra1	0.59633	2.5807	2.92714	0.881643	0.37797	NA
ENSMUSG00000000266	Mid2	695.305	-0.474037	0.214035	-2.21476	0.0267762	0.139608
ENSMUSG00000000275	Trim25	42.0831	-0.356404	0.333759	-1.06785	0.285588	0.579327
ENSMUSG00000000276	Dgke	1693.05	0.0653901	0.133413	0.490133	0.62404	0.836332
ENSMUSG00000000278	Scpep1	975.437	0.115834	0.120155	0.964041	0.335026	0.625171
ENSMUSG00000000282	Mnt	2219.07	0.407452	0.139411	2.92267	0.00347043	0.0333537
ENSMUSG00000000290	Itgb2	2.19668	-1.9581	1.57635	-1.24217	0.214172	NA
ENSMUSG00000000295	Hddc2	273.909	-0.0166155	0.199945	-0.0831005	0.933772	0.97777
ENSMUSG00000000296	Tpd52l1	200.854	0.00445929	0.180965	0.0246418	0.980341	0.992793
ENSMUSG00000000301	Pemt	62.7262	-0.296949	0.343552	-0.86435	0.387395	0.672009
ENSMUSG00000000303	Cdh1	1.34904	0.167961	2.40961	0.0697046	0.944429	NA
ENSMUSG00000000305	Cdh4	2464.76	0.0476316	0.20348	0.234084	0.81492	0.933084
ENSMUSG00000000308	Ckmt1	1848.87	-0.346566	0.147644	-2.3473	0.0189098	0.110656
ENSMUSG00000000317	Bcl6b	74.2468	0.116102	0.268676	0.432128	0.665649	0.857773
ENSMUSG00000000318	Clec10a	1.11878	-0.754758	2.19881	-0.343258	0.731405	NA
ENSMUSG00000000320	Alox12	0.711774	-0.889404	2.84587	-0.312525	0.754642	NA
ENSMUSG00000000325	NA	1379.11	0.0680545	0.123932	0.549128	0.582918	0.811322
ENSMUSG00000000326	Comt	1517.59	-0.132809	0.103418	-1.28419	0.199074	0.479846
ENSMUSG00000000339	Rtca	1064.17	-0.148119	0.174924	-0.846765	0.397126	0.680759
ENSMUSG00000000340	Dbt	556.202	-0.0584828	0.199288	-0.293459	0.769171	0.910494
ENSMUSG00000000346	Dazap2	2307.71	-0.319286	0.0997213	-3.20178	0.00136581	0.016592
ENSMUSG00000000355	Mcts1	780.173	-0.179698	0.157187	-1.14321	0.252952	0.546292
ENSMUSG00000000365	Rnf17	16.98	0.842015	0.562094	1.498	0.134134	0.386201
ENSMUSG00000000374	Trappc10	3108.12	-0.19602	0.127512	-1.53726	0.124229	0.368796
ENSMUSG00000000378	Ccm2	1271.93	-0.0452398	0.197997	-0.228487	0.819268	0.933904
ENSMUSG00000000384	Tbrg4	605.914	-0.0236488	0.143573	-0.164717	0.869167	0.954567
ENSMUSG00000000385	Tmprss2	5.37548	2.0029	1.48957	1.34462	0.178749	NA
ENSMUSG00000000386	Mx1	3.6066	1.37117	1.36508	1.00446	0.315155	NA
ENSMUSG00000000392	Fap	11.8822	0.322254	0.727087	0.443212	0.657613	NA
ENSMUSG00000000399	Ndufa9	1994.56	-0.222507	0.11503	-1.93433	0.0530721	0.218188
ENSMUSG00000000402	Egfl6	7.4811	-0.0813016	0.799917	-0.101638	0.919044	NA
ENSMUSG00000000409	Lck	294.755	-0.347767	0.170298	-2.04211	0.0411409	0.18548
ENSMUSG00000000411	Tssk3	0.926293	0.80968	2.09959	0.385637	0.699766	NA
ENSMUSG00000000416	Cttnbp2	1323.6	0.345984	0.246129	1.4057	0.159813	0.42413
ENSMUSG00000000420	Galnt1	1313.58	0.134338	0.15884	0.84574	0.397698	0.681043
ENSMUSG00000000439	Mkrn2	1585.28	0.104985	0.100068	1.04914	0.294115	0.588369
ENSMUSG00000000440	Pparg	20.0584	1.73265	0.772212	2.24376	0.0248481	0.132961
ENSMUSG00000000441	Raf1	2722.77	-0.13371	0.140438	-0.952093	0.34105	0.630915
ENSMUSG00000000486	Septin1	14.8157	0.795976	0.567497	1.40261	0.160733	0.425168
ENSMUSG00000000489	Pdgfb	647.899	-0.461684	0.128236	-3.60027	0.000317884	0.0053022
ENSMUSG00000000530	Acvrl1	5.57405	-0.398519	1.01572	-0.392352	0.694798	NA
ENSMUSG00000000531	Tamalin	230.182	-0.153865	0.190035	-0.809668	0.418131	0.698196
ENSMUSG00000000532	Acvr1b	5341	0.348522	0.0844998	4.12453	3.71486e-05	0.000975167
ENSMUSG00000000538	Tom1l2	5225.14	0.171708	0.131332	1.30743	0.191067	0.469891
ENSMUSG00000000544	Gpa33	1.3081	2.60236	2.48845	1.04578	0.295665	NA
ENSMUSG00000000552	Zfp385a	845.866	0.138003	0.143191	0.963767	0.335163	0.625329
ENSMUSG00000000555	Itga5	123.61	-0.476917	0.250394	-1.90467	0.0568236	0.228698
ENSMUSG00000000560	Gabra2	6979.12	-0.139037	0.140347	-0.990667	0.321848	0.614483
ENSMUSG00000000561	Wdr77	1645.55	-0.263017	0.103904	-2.53134	0.0113628	0.0774262
ENSMUSG00000000562	Adora3	1.0187	1.02138	2.32174	0.43992	0.659995	NA
ENSMUSG00000000563	Atp5pb	5094.15	-0.0854442	0.0989886	-0.863172	0.388043	0.672248
ENSMUSG00000000567	Sox9	791.84	0.114723	0.160748	0.713683	0.475423	0.742596
ENSMUSG00000000568	Hnrnpd	4395.36	0.0525954	0.125146	0.420273	0.674286	0.862028
ENSMUSG00000000579	Dynlt1c	64.3697	0.455262	0.459499	0.990779	0.321794	0.614483
ENSMUSG00000000581	C1d	1388.45	0.22032	0.188582	1.1683	0.242686	0.533296
ENSMUSG00000000594	Gm2a	2192	-0.239197	0.10909	-2.19265	0.0283323	0.144668
ENSMUSG00000000600	Krit1	673.086	-0.278502	0.131126	-2.12392	0.0336764	0.162768
ENSMUSG00000000605	Clcn4	7998.27	0.195287	0.16114	1.21191	0.225548	0.512961
ENSMUSG00000000606	Vmn2r88	2.36278	-0.0873172	1.35357	-0.0645087	0.948565	NA
ENSMUSG00000000617	Grm6	1.04226	0.360019	2.31876	0.155264	0.876614	NA
ENSMUSG00000000627	Sema4f	2342.89	0.42793	0.119365	3.58505	0.000337018	0.00552242
ENSMUSG00000000628	Hk2	1016.99	0.0415446	0.208459	0.199293	0.842033	0.943211
ENSMUSG00000000631	Myo18a	4190.14	0.110844	0.150169	0.738127	0.460437	0.730946
ENSMUSG00000000632	Sez6	7180.91	0.756768	0.0957015	7.90759	2.62417e-15	1.01312e-12
ENSMUSG00000000682	Cd52	0.614282	1.08678	2.98167	0.364487	0.715495	NA
ENSMUSG00000000686	Abhd15	14.9749	-0.471125	0.545464	-0.863714	0.387745	0.672161
ENSMUSG00000000690	Hoxb6	0.473668	0.533694	3.25162	0.164132	0.869627	NA
ENSMUSG00000000693	Loxl3	79.5681	-0.202932	0.458059	-0.443027	0.657747	0.853132
ENSMUSG00000000706	Btn1a1	1.35468	-0.670748	2.20452	-0.304261	0.760929	NA
ENSMUSG00000000708	Kat2b	200.237	0.336237	0.224462	1.49797	0.134142	0.386201
ENSMUSG00000000711	Rab5b	4908.62	0.239764	0.0882332	2.71739	0.00657993	0.0527361
ENSMUSG00000000724	Cryba1	1.43475	2.80247	2.05637	1.36283	0.172937	NA
ENSMUSG00000000731	Aire	2.29846	0.354189	1.52178	0.232746	0.815959	NA
ENSMUSG00000000732	Icosl	16.4926	-0.407079	0.587268	-0.693175	0.4882	0.750861
ENSMUSG00000000738	Spg7	930.849	0.324809	0.207201	1.5676	0.116975	0.355009
ENSMUSG00000000739	Sult5a1	6.66176	0.446926	0.868544	0.514569	0.606854	NA
ENSMUSG00000000740	Rpl13	2311.39	0.027098	0.240097	0.112863	0.910139	0.970547
ENSMUSG00000000743	Chmp1a	3726.5	-0.0847386	0.140684	-0.602334	0.546952	0.787565
ENSMUSG00000000751	Rpa1	1026.99	0.091101	0.124629	0.730978	0.464793	0.733953
ENSMUSG00000000753	Serpinf1	100.657	-2.78913	0.324944	-8.5834	9.21091e-18	5.83198e-15
ENSMUSG00000000759	Tubgcp3	1032.4	0.115465	0.163346	0.706873	0.479645	0.744403
ENSMUSG00000000766	Oprm1	31.438	0.305104	0.820481	0.37186	0.709997	0.879111
ENSMUSG00000000776	Polr3d	691.345	-0.060751	0.22284	-0.272622	0.785144	0.91796
ENSMUSG00000000782	Tcf7	16.8369	1.12998	0.555454	2.03434	0.0419175	0.188025
ENSMUSG00000000787	Ddx3x	5633.22	0.0171898	0.15934	0.107881	0.91409	0.971187
ENSMUSG00000000791	Il12rb1	9.06719	-1.20273	0.726034	-1.65658	0.0976053	NA
ENSMUSG00000000792	Slc5a5	37.3736	-0.342961	0.374398	-0.916031	0.35965	0.646701
ENSMUSG00000000794	Kcnn3	838.33	0.12607	0.158107	0.797368	0.425237	0.703205
ENSMUSG00000000804	Usp32	3292.85	0.178595	0.218709	0.816587	0.414164	0.694696
ENSMUSG00000000805	Car4	23.6885	-1.18816	0.489607	-2.42677	0.0152339	0.0951579
ENSMUSG00000000811	Txnrd3	489.752	0.168262	0.141489	1.18922	0.234354	0.523949
ENSMUSG00000000817	Fasl	3.37392	0.257113	1.1873	0.216553	0.828556	NA
ENSMUSG00000000823	Zfp512b	2933.62	0.0494384	0.123281	0.401023	0.688403	0.86882
ENSMUSG00000000826	Dnajc5	13165.1	0.226115	0.102352	2.20918	0.0271624	0.140783
ENSMUSG00000000827	Tpd52l2	1137.17	0.105437	0.125564	0.839706	0.401073	0.68441
ENSMUSG00000000838	Fmr1	2075.65	0.137038	0.13051	1.05002	0.293709	0.587901
ENSMUSG00000000861	Bcl11a	2272.38	-0.012348	0.102968	-0.119921	0.904545	0.969125
ENSMUSG00000000869	Il4	148.108	-0.27246	0.192935	-1.41219	0.157894	0.421906
ENSMUSG00000000876	Pxmp4	675.927	-0.103221	0.14959	-0.690025	0.490178	0.751981
ENSMUSG00000000881	Dlg3	4331.25	-0.192267	0.126859	-1.5156	0.129621	0.378276
ENSMUSG00000000884	Gnb1l	214.259	-0.179372	0.186026	-0.964227	0.334932	0.625171
ENSMUSG00000000889	Dbh	10.5056	0.360143	0.677403	0.531652	0.594967	NA
ENSMUSG00000000901	Mmp11	41.4169	0.194981	0.580425	0.335928	0.736925	0.892896
ENSMUSG00000000902	Smarcb1	1810.29	0.0528151	0.128026	0.412535	0.679948	0.865323
ENSMUSG00000000915	Hip1r	2103.57	0.464142	0.153149	3.03066	0.00244022	0.0258151
ENSMUSG00000000916	Nsun5	250.458	0.674933	0.190144	3.54959	0.000385834	0.00617063
ENSMUSG00000000934	Top1mt	325.636	-0.504299	0.198289	-2.54325	0.0109826	0.0756496
ENSMUSG00000000948	NA	458.468	-0.924843	0.284571	-3.24996	0.00115422	0.0144762
ENSMUSG00000000957	Mmp14	903.803	0.218955	0.11199	1.95513	0.0505673	0.211474
ENSMUSG00000000958	Slc7a7	19.5196	-0.425527	0.59155	-0.719342	0.47193	0.74099
ENSMUSG00000000959	Oxa1l	1300.08	-0.0841625	0.101462	-0.829494	0.406825	0.688583
ENSMUSG00000000976	Heatr6	730.591	0.25049	0.180369	1.38876	0.164906	0.431668
ENSMUSG00000000983	Wfdc18	0.937577	-0.638787	2.65657	-0.240455	0.809977	NA
ENSMUSG00000001014	Icam4	7.92584	0.491165	0.856848	0.573223	0.566494	NA
ENSMUSG00000001016	Ilf2	2276.78	0.136718	0.102436	1.33467	0.181985	0.457827
ENSMUSG00000001017	Chtop	4588.91	0.165505	0.115941	1.4275	0.153437	0.415668
ENSMUSG00000001018	Snapin	894.05	-0.0811074	0.138484	-0.585679	0.558091	0.794784
ENSMUSG00000001020	S100a4	4.71583	-0.503786	1.30562	-0.385861	0.6996	NA
ENSMUSG00000001021	S100a3	3.07059	-0.661408	1.23816	-0.534186	0.593213	NA
ENSMUSG00000001025	S100a6	30.4448	-0.867385	0.488189	-1.77674	0.0756109	0.272941
ENSMUSG00000001034	Mapk7	2086.76	0.414113	0.112302	3.68751	0.000226463	0.0040187
ENSMUSG00000001036	Epn2	2511.06	0.151989	0.105032	1.44708	0.147875	0.408358
ENSMUSG00000001039	B9d1	165.276	-0.238613	0.218108	-1.09401	0.27395	0.56891
ENSMUSG00000001052	Sec24b	1897.13	0.226216	0.125877	1.79712	0.0723159	0.265836
ENSMUSG00000001053	N4bp3	273.343	-0.480669	0.204625	-2.34902	0.0188227	0.110282
ENSMUSG00000001054	Rmnd5b	955.992	-0.0953585	0.145649	-0.654715	0.512651	0.765326
ENSMUSG00000001056	Nhp2	694.803	-0.124387	0.187816	-0.662282	0.50779	0.76233
ENSMUSG00000001062	Vps9d1	1276.73	0.185648	0.156891	1.18329	0.236693	0.526802
ENSMUSG00000001065	Zfp276	481.961	-0.488852	0.765733	-0.638411	0.523206	0.771695
ENSMUSG00000001076	C1ql4	7.13175	-0.0192727	0.816505	-0.0236039	0.981169	NA
ENSMUSG00000001082	Mfsd10	447.409	0.404902	0.228168	1.77458	0.0759673	0.27379
ENSMUSG00000001089	Luzp1	774.41	-0.833477	0.290669	-2.86744	0.00413803	0.0378181
ENSMUSG00000001098	Kctd10	2014.35	0.974376	0.115884	8.40822	4.16268e-17	2.05909e-14
ENSMUSG00000001100	Poldip2	1773.45	-0.0776376	0.118574	-0.654761	0.512622	0.765326
ENSMUSG00000001103	Sebox	5.52575	-0.0451574	0.928211	-0.0486499	0.961198	NA
ENSMUSG00000001105	Ift20	874.845	-0.077019	0.16474	-0.46752	0.640128	0.844241
ENSMUSG00000001119	Col6a1	208.858	-0.65903	0.179001	-3.6817	0.00023168	0.00408382
ENSMUSG00000001120	Pcbp3	1836.63	0.0472744	0.129814	0.364171	0.71573	0.881795
ENSMUSG00000001123	Lgals9	1.09579	-1.92126	2.51987	-0.762442	0.445796	NA
ENSMUSG00000001127	Araf	3241.37	0.015989	0.148022	0.108017	0.913982	0.971187
ENSMUSG00000001128	Cfp	75.2216	0.170468	0.422661	0.403321	0.686712	0.868139
ENSMUSG00000001131	Timp1	7.1873	0.0281336	0.827922	0.033981	0.972892	NA
ENSMUSG00000001134	Uxt	67.4552	-0.196993	0.288426	-0.682995	0.49461	0.754453
ENSMUSG00000001138	Cnnm3	744.859	-0.0010974	0.155775	-0.00704478	0.994379	0.997887
ENSMUSG00000001143	Lman2l	1422.9	-0.303346	0.101917	-2.9764	0.00291652	0.0294424
ENSMUSG00000001150	Mcm3ap	1526.54	0.0373018	0.178518	0.208953	0.834485	0.941409
ENSMUSG00000001151	Pcnt	334.261	0.24673	0.314566	0.78435	0.432835	0.709176
ENSMUSG00000001155	Ftcd	0.681257	-1.75495	2.9202	-0.600969	0.54786	NA
ENSMUSG00000001156	Mxd1	321.423	0.300611	0.172672	1.74093	0.081695	0.286222
ENSMUSG00000001157	Gmcl1	827.299	0.150233	0.110867	1.35507	0.175396	0.448158
ENSMUSG00000001158	Snrnp27	498.97	0.163816	0.240231	0.68191	0.495296	0.754576
ENSMUSG00000001166	Oas1c	20.4341	-0.442188	0.704273	-0.627865	0.530092	0.775775
ENSMUSG00000001173	Ocrl	1536.85	0.213846	0.0936586	2.28325	0.0224154	0.123913
ENSMUSG00000001175	Calm1	49916.5	-0.20269	0.11884	-1.70557	0.088088	0.299537
ENSMUSG00000001211	Agpat3	8432.18	-0.091386	0.143	-0.639063	0.522782	0.771536
ENSMUSG00000001225	Slc26a3	1.88444	1.14138	1.65836	0.688256	0.491291	NA
ENSMUSG00000001227	Sema6b	4096.41	-0.00861897	0.104421	-0.0825409	0.934217	0.97777
ENSMUSG00000001228	Uhrf1	132.791	1.37151	0.373664	3.67043	0.000242143	0.0042222
ENSMUSG00000001229	Dpp9	966.225	-0.528002	0.13233	-3.99003	6.60657e-05	0.00152888
ENSMUSG00000001240	Ramp2	134.068	-0.770858	0.239142	-3.22344	0.00126661	0.0155541
ENSMUSG00000001247	Lsr	20.5826	-0.367047	0.56697	-0.647384	0.517383	0.768766
ENSMUSG00000001248	Gramd1a	3875.91	-0.0307786	0.132594	-0.232127	0.81644	0.933704
ENSMUSG00000001249	Hpn	0.600951	0.445545	3.08133	0.144595	0.885031	NA
ENSMUSG00000001260	Gabrg1	1049.53	-0.18328	0.171256	-1.07021	0.284524	0.578513
ENSMUSG00000001270	Ckb	12500.6	-0.155878	0.118192	-1.31886	0.187217	0.465341
ENSMUSG00000001280	Sp1	736.68	1.01193	0.756248	1.33809	0.180866	0.456244
ENSMUSG00000001281	Itgb7	9.40572	-0.434521	1.01667	-0.427398	0.669089	NA
ENSMUSG00000001285	Myg1	394.025	0.231638	0.157691	1.46893	0.141851	0.398466
ENSMUSG00000001288	Rarg	154.588	0.351035	0.228274	1.53778	0.124103	0.368699
ENSMUSG00000001289	Pfdn5	2127.67	0.0295889	0.140571	0.210491	0.833285	0.940952
ENSMUSG00000001300	Efnb2	4585.19	0.362927	0.104235	3.4818	0.00049805	0.00757823
ENSMUSG00000001305	Rrp15	204.275	0.170769	0.183183	0.932229	0.351218	0.639898
ENSMUSG00000001313	Rnd2	864.568	0.074874	0.143638	0.521269	0.602179	0.821998
ENSMUSG00000001323	Srr	2841.35	-0.212025	0.121963	-1.73843	0.0821342	0.287062
ENSMUSG00000001333	Sync	6.74251	-0.590667	0.930873	-0.63453	0.525735	NA
ENSMUSG00000001334	Fndc5	433.922	0.0247823	0.131288	0.188762	0.850279	0.946971
ENSMUSG00000001348	Acp5	5.24586	-0.00987035	1.43323	-0.00688676	0.994505	NA
ENSMUSG00000001349	Cnn1	10.6537	1.01558	0.755021	1.3451	0.178593	NA
ENSMUSG00000001366	Fbxo9	1972.32	0.0810827	0.13381	0.605954	0.544545	0.786025
ENSMUSG00000001376	Vps50	1775.18	0.135139	0.134057	1.00807	0.313421	0.606645
ENSMUSG00000001380	Hars	2698.53	-0.102977	0.106328	-0.968486	0.332802	0.623275
ENSMUSG00000001383	Zmat2	2764.66	-0.115312	0.136952	-0.841985	0.399797	0.682998
ENSMUSG00000001403	Ube2c	80.213	1.43622	0.318985	4.50247	6.71687e-06	0.00024219
ENSMUSG00000001415	Smg5	2365.35	0.126552	0.0996771	1.26962	0.204221	0.48517
ENSMUSG00000001416	Cct3	4212.37	0.0163516	0.152566	0.107177	0.914648	0.971285
ENSMUSG00000001418	Glmp	663.829	-0.0420728	0.139101	-0.302463	0.762299	0.907103
ENSMUSG00000001419	Mef2d	4369.71	0.0810427	0.0977195	0.82934	0.406912	0.688594
ENSMUSG00000001420	Tmem79	11.6708	0.40694	0.639367	0.636473	0.524468	NA
ENSMUSG00000001424	Snd1	2917.48	-0.036898	0.141492	-0.260778	0.794264	0.922205
ENSMUSG00000001435	Col18a1	124.363	-0.604644	0.328709	-1.83945	0.0658491	0.251102
ENSMUSG00000001436	Slc19a1	609.908	-0.0356236	0.161703	-0.220302	0.825636	0.936711
ENSMUSG00000001440	Kpnb1	6760.13	0.131792	0.125653	1.04885	0.294246	0.588369
ENSMUSG00000001441	Npepps	5041.51	0.137713	0.109256	1.26046	0.207504	0.489022
ENSMUSG00000001444	Tbx21	7.34247	-0.672023	0.919509	-0.73085	0.464871	NA
ENSMUSG00000001445	Mrpl10	1172.74	-0.303258	0.147315	-2.05857	0.0395352	0.180763
ENSMUSG00000001467	Cyp51	7941.67	-0.0503155	0.0976682	-0.515168	0.606436	0.825
ENSMUSG00000001472	Tcf25	10019.9	-0.163806	0.0829381	-1.97504	0.0482636	0.205881
ENSMUSG00000001473	Tubb6	109.273	-0.195083	0.275092	-0.709158	0.478226	0.744403
ENSMUSG00000001482	Def8	1808.39	0.103445	0.119616	0.864811	0.387142	0.67172
ENSMUSG00000001493	Meox1	20.6299	-0.41304	0.517302	-0.79845	0.424609	0.702607
ENSMUSG00000001494	Sost	1.59872	-1.43086	2.29146	-0.624434	0.532343	NA
ENSMUSG00000001496	Nkx2-1	1.94886	0.264317	1.4505	0.182225	0.855406	NA
ENSMUSG00000001497	Pax9	1.21669	-1.89769	2.48273	-0.764356	0.444655	NA
ENSMUSG00000001506	Col1a1	22.9869	0.134122	0.559004	0.239931	0.810384	0.930613
ENSMUSG00000001507	Itga3	839.666	-0.651534	0.153239	-4.25175	2.12106e-05	0.000626384
ENSMUSG00000001508	Sgca	9.83387	-1.49369	1.38723	-1.07674	0.281595	NA
ENSMUSG00000001510	Dlx3	1.78294	1.18201	2.06797	0.571579	0.567607	NA
ENSMUSG00000001517	Foxm1	138.113	1.82593	0.256071	7.13057	9.99521e-13	2.28542e-10
ENSMUSG00000001518	Itfg2	369.686	0.00795421	0.16525	0.0481343	0.961609	0.986142
ENSMUSG00000001520	Nrip2	83.2648	-1.07601	0.257239	-4.18293	2.87782e-05	0.000800582
ENSMUSG00000001521	Tulp3	521.975	-0.141776	0.148133	-0.95709	0.338522	0.628411
ENSMUSG00000001524	Gtf2h4	285.532	-0.21981	0.30825	-0.713092	0.475789	0.742781
ENSMUSG00000001525	Tubb5	47175.9	0.48956	0.10928	4.47989	7.46824e-06	0.000264463
ENSMUSG00000001542	Ell2	143.034	1.21949	0.247824	4.9208	8.61906e-07	4.34494e-05
ENSMUSG00000001552	Jup	1857.54	0.560593	0.134507	4.16775	3.07615e-05	0.000839523
ENSMUSG00000001555	Fkbp10	198.963	-0.800017	0.212641	-3.76229	0.000168362	0.00321472
ENSMUSG00000001558	Klhl10	22.0685	-0.448544	0.462895	-0.968997	0.332547	0.62307
ENSMUSG00000001569	Nom1	565.383	0.216962	0.126704	1.71235	0.0868313	0.29689
ENSMUSG00000001576	Ergic1	3997.43	-0.618714	0.100274	-6.17026	6.81778e-10	8.49753e-08
ENSMUSG00000001583	Tnk1	3.50991	-0.485527	1.44254	-0.336579	0.736435	NA
ENSMUSG00000001588	Acap1	1.6485	1.49072	1.80698	0.824978	0.409384	NA
ENSMUSG00000001604	Tcea3	6.85678	-0.760112	0.903748	-0.841066	0.400311	NA
ENSMUSG00000001622	Csn3	0.797781	1.6005	2.78181	0.575344	0.565059	NA
ENSMUSG00000001627	Ifrd1	1309.71	0.240042	0.121404	1.97721	0.0480181	0.20526
ENSMUSG00000001630	Stk38l	446.384	0.155158	0.133952	1.1583	0.24674	0.538093
ENSMUSG00000001632	Brpf1	596.881	0.261009	0.137905	1.89267	0.0584015	0.233326
ENSMUSG00000001642	Akr1b3	1598.06	-0.214888	0.115207	-1.86524	0.0621477	0.24224
ENSMUSG00000001657	Hoxc8	0.660631	1.3646	2.95655	0.461552	0.644403	NA
ENSMUSG00000001663	Gstt1	43.1354	-0.150868	0.412241	-0.36597	0.714387	0.880826
ENSMUSG00000001665	Gstt3	17.4227	-0.557491	0.580127	-0.960982	0.336561	0.626366
ENSMUSG00000001666	Ddt	341.554	0.0818078	0.165632	0.493913	0.621368	0.834377
ENSMUSG00000001672	Marveld3	1.74135	-0.240838	1.74469	-0.138041	0.890208	NA
ENSMUSG00000001674	Ddx18	501.61	-0.169482	0.157782	-1.07415	0.282755	0.576696
ENSMUSG00000001687	Ubl3	1835.19	-0.0859143	0.108139	-0.794479	0.426917	0.704364
ENSMUSG00000001700	Gramd3	354.324	-0.132868	0.160701	-0.826804	0.408348	0.690103
ENSMUSG00000001707	Eef1e1	965.094	-0.569336	0.188962	-3.01296	0.00258712	0.026995
ENSMUSG00000001729	Akt1	5061.49	0.198359	0.0895753	2.21444	0.0267989	0.139658
ENSMUSG00000001741	Il16	24.4292	-0.496961	0.664146	-0.748269	0.454298	0.725932
ENSMUSG00000001750	Tcirg1	91.4624	0.157331	0.269916	0.582889	0.559968	0.795954
ENSMUSG00000001751	Naglu	313.953	-0.387504	0.191959	-2.01869	0.0435198	0.192638
ENSMUSG00000001755	Coasy	893.362	-0.027001	0.126283	-0.213814	0.830692	0.939552
ENSMUSG00000001761	Smo	552.698	-0.0487589	0.140938	-0.345961	0.729372	0.888691
ENSMUSG00000001763	Tspan33	340.807	-0.753697	0.154109	-4.89068	1.00486e-06	4.89027e-05
ENSMUSG00000001767	Crnkl1	413.106	-0.293043	0.207029	-1.41547	0.15693	0.420848
ENSMUSG00000001768	Rin2	209.632	-0.15887	0.203082	-0.782295	0.434041	0.710208
ENSMUSG00000001773	Folh1	29.2594	-0.763621	0.490791	-1.5559	0.119732	0.360037
ENSMUSG00000001774	Chordc1	1272.1	0.0954036	0.120389	0.792459	0.428093	0.705234
ENSMUSG00000001783	Rtcb	2478.73	-0.352856	0.134346	-2.62647	0.00862765	0.0639958
ENSMUSG00000001785	Pwp1	899.022	-0.145697	0.144129	-1.01088	0.312075	0.605488
ENSMUSG00000001786	Fbxo7	2190.79	-0.141024	0.156408	-0.90164	0.367248	0.653807
ENSMUSG00000001794	Capns1	3766.52	0.0313331	0.11829	0.264883	0.791099	0.920624
ENSMUSG00000001802	Lrp3	3059.87	0.0483232	0.0915253	0.527976	0.597516	0.818301
ENSMUSG00000001804	Dsg4	1.4806	1.70135	1.9894	0.855206	0.392437	NA
ENSMUSG00000001827	Folr1	44.0481	0.301714	0.375615	0.803253	0.421828	0.70089
ENSMUSG00000001829	Clpb	1888.02	-0.070181	0.109693	-0.639793	0.522307	0.771159
ENSMUSG00000001833	Septin7	5838.15	-0.371352	0.0832606	-4.46012	8.19122e-06	0.00028762
ENSMUSG00000001844	Zdhhc4	497.715	-0.12743	0.153009	-0.83283	0.404941	0.687161
ENSMUSG00000001847	Rac1	8485.28	0.331529	0.0888994	3.72926	0.000192046	0.00356795
ENSMUSG00000001855	Nup214	950.134	0.0173113	0.260587	0.0664318	0.947034	0.980928
ENSMUSG00000001864	Aif1l	378.917	0.38736	0.154905	2.50063	0.0123974	0.0825573
ENSMUSG00000001870	Ltbp1	42.8159	-0.278957	0.383119	-0.728121	0.466539	0.735543
ENSMUSG00000001891	Ugp2	1461.13	-0.44511	0.12644	-3.52034	0.000430995	0.00674132
ENSMUSG00000001901	Kcnh6	60.9675	0.178071	0.30087	0.591856	0.553947	0.791446
ENSMUSG00000001909	Trmt1	1000.35	0.0555381	0.171325	0.324169	0.74581	0.898545
ENSMUSG00000001910	Nacc1	2866.28	0.0918879	0.0977732	0.939807	0.347317	0.636232
ENSMUSG00000001911	Nfix	9370.71	0.248317	0.126277	1.96645	0.0492463	0.208539
ENSMUSG00000001918	Slc1a5	271.7	-1.2539	0.307719	-4.07483	4.60479e-05	0.00115881
ENSMUSG00000001924	Uba1	13371	0.241851	0.119106	2.03055	0.0423008	0.189147
ENSMUSG00000001930	Vwf	7.44931	-0.73284	1.01328	-0.723236	0.469535	NA
ENSMUSG00000001942	Siae	588.088	0.0500626	0.140158	0.357187	0.720952	0.884579
ENSMUSG00000001943	Vsig2	78.7331	-0.100977	0.283285	-0.356452	0.721502	0.884979
ENSMUSG00000001946	Esam	7.5437	1.2902	1.03699	1.24418	0.213434	NA
ENSMUSG00000001948	Spa17	26.1407	0.278557	0.465069	0.59896	0.5492	0.788578
ENSMUSG00000001962	Fam50a	776.453	-0.00246281	0.149588	-0.016464	0.986864	0.995163
ENSMUSG00000001964	Emd	1380.9	-0.23427	0.121204	-1.93285	0.0532548	0.218556
ENSMUSG00000001983	Taco1	379.184	0.00935103	0.137023	0.0682443	0.945591	0.980628
ENSMUSG00000001985	Grik3	2721.6	0.506487	0.119938	4.22292	2.41159e-05	0.00069532
ENSMUSG00000001986	Gria3	2166.38	-0.0856117	0.221375	-0.386728	0.698958	0.873642
ENSMUSG00000001988	Npas1	119.47	-0.203444	0.219387	-0.927326	0.353757	0.641865
ENSMUSG00000001995	Sipa1l2	1564.64	0.169239	0.112881	1.49927	0.133804	0.385577
ENSMUSG00000001998	Ap4e1	337.576	0.559947	0.270454	2.0704	0.0384153	0.17723
ENSMUSG00000001999	Blvra	199.969	-0.212705	0.219419	-0.9694	0.332346	0.623
ENSMUSG00000002006	Pdzd4	4869.74	0.0506338	0.0989709	0.511602	0.608929	0.826062
ENSMUSG00000002007	Srpk3	6.38814	1.38188	1.09232	1.26509	0.20584	NA
ENSMUSG00000002010	Idh3g	2029.57	-0.0300624	0.131073	-0.229356	0.818592	0.933788
ENSMUSG00000002012	Pnck	1262.47	-0.0745349	0.105529	-0.706297	0.480004	0.744403
ENSMUSG00000002014	Ssr4	589.982	-0.28601	0.157307	-1.81816	0.0690396	0.258535
ENSMUSG00000002015	Bcap31	1311.42	0.041009	0.100927	0.406322	0.684506	0.867081
ENSMUSG00000002017	Fam98a	1126.98	-0.0424013	0.105317	-0.402608	0.687237	0.868328
ENSMUSG00000002020	Ltbp2	4.97515	-1.88987	1.13327	-1.66762	0.0953903	NA
ENSMUSG00000002028	Kmt2a	2802.78	0.578827	0.241746	2.39437	0.0166491	0.101204
ENSMUSG00000002031	Ift46	907.882	0.212909	0.134362	1.5846	0.113058	0.347198
ENSMUSG00000002032	Tmem25	544.831	-0.172805	0.142647	-1.21141	0.225737	0.513168
ENSMUSG00000002043	Trappc6a	238.191	0.0228495	0.15803	0.14459	0.885035	0.961286
ENSMUSG00000002052	Supt6	3714.07	0.089304	0.130938	0.682031	0.49522	0.754532
ENSMUSG00000002055	Spag5	98.2442	0.0744889	0.456335	0.163233	0.870335	0.954915
ENSMUSG00000002058	Unc119	1040.4	-0.163405	0.125571	-1.3013	0.193156	0.471879
ENSMUSG00000002059	Rab34	372.166	-0.114534	0.258852	-0.442469	0.65815	0.853236
ENSMUSG00000002064	Sdf2	933.271	-0.0837104	0.171873	-0.487048	0.626224	0.837487
ENSMUSG00000002068	Ccne1	324.116	-0.391732	0.151973	-2.57765	0.00994753	0.0707047
ENSMUSG00000002076	Hsf2bp	9.16328	0.0732232	1.04978	0.069751	0.944392	NA
ENSMUSG00000002083	Bbc3	1252.65	-0.422353	0.158781	-2.65997	0.00781467	0.0598444
ENSMUSG00000002102	Psmc3	3007.56	0.0326425	0.12769	0.255639	0.798229	0.924029
ENSMUSG00000002103	Acp2	2061	-0.0505551	0.161565	-0.312909	0.75435	0.903223
ENSMUSG00000002104	Rapsn	2.33916	-2.66734	1.79467	-1.48626	0.137211	NA
ENSMUSG00000002105	Slc39a13	403.065	0.213491	0.210296	1.01519	0.310014	0.603741
ENSMUSG00000002107	Celf2	15304	0.0368351	0.211848	0.173875	0.861964	0.951267
ENSMUSG00000002108	Nr1h3	11.1038	0.702884	0.664613	1.05758	0.290245	NA
ENSMUSG00000002109	Ddb2	177.969	-0.00273219	0.197732	-0.0138176	0.988976	0.995951
ENSMUSG00000002129	Sf3a1	3127.39	0.137708	0.105922	1.30009	0.19357	0.472187
ENSMUSG00000002147	Stat6	13.9954	-2.52334	0.952491	-2.6492	0.00806826	0.0611065
ENSMUSG00000002190	Clgn	414.113	-0.0711456	0.154595	-0.460205	0.645369	0.846472
ENSMUSG00000002204	Napsa	4.56404	1.08017	1.2575	0.858981	0.390351	NA
ENSMUSG00000002205	Vrk3	575.442	-0.189587	0.166469	-1.13888	0.254754	0.547916
ENSMUSG00000002210	Smg9	730.834	-0.0200797	0.181111	-0.110869	0.91172	0.970547
ENSMUSG00000002221	Paxip1	1303.95	0.587423	0.144491	4.06545	4.7939e-05	0.00119125
ENSMUSG00000002222	Rmnd5a	2855.5	-1.06229	0.136021	-7.80975	5.73035e-15	1.97186e-12
ENSMUSG00000002227	Mov10	116.16	-0.17254	0.266663	-0.647034	0.51761	0.768813
ENSMUSG00000002228	Ppm1j	13.7076	-1.3537	0.750448	-1.80385	0.071255	0.263423
ENSMUSG00000002233	Rhoc	296.319	-0.125081	0.183391	-0.682047	0.495209	0.754532
ENSMUSG00000002249	Tead3	77.2141	-1.0868	0.405906	-2.67746	0.00741831	0.0575328
ENSMUSG00000002250	Ppard	392.421	-0.0238679	0.178856	-0.133447	0.89384	0.965534
ENSMUSG00000002257	Def6	49.5895	0.162848	0.35769	0.455276	0.648911	0.847906
ENSMUSG00000002265	Peg3	4651.31	0.196753	0.172072	1.14343	0.252858	0.546292
ENSMUSG00000002266	Zim1	530.085	0.0347959	0.208963	0.166517	0.86775	0.953906
ENSMUSG00000002274	Metrn	1422.58	0.0207775	0.153524	0.135337	0.892345	0.965045
ENSMUSG00000002279	Lmf1	353.447	-0.282975	0.168389	-1.68048	0.0928645	0.308425
ENSMUSG00000002280	Ciao3	436.001	0.121202	0.272241	0.4452	0.656176	0.852339
ENSMUSG00000002289	Angptl4	84.0883	-0.365025	0.329708	-1.10712	0.268244	0.561942
ENSMUSG00000002297	Dbf4	117.768	-0.287783	0.237763	-1.21038	0.226133	0.513626
ENSMUSG00000002307	Daxx	634.445	0.0526029	0.129512	0.406162	0.684623	0.867109
ENSMUSG00000002308	Cd320	229.925	0.0312353	0.190784	0.163721	0.869951	0.954684
ENSMUSG00000002319	Ipo4	2597.54	-0.161598	0.131218	-1.23152	0.218128	0.503829
ENSMUSG00000002320	Tm9sf1	822.006	-0.231798	0.133233	-1.7398	0.0818948	0.28662
ENSMUSG00000002324	Rec8	16.9747	-0.91862	0.570014	-1.61157	0.107055	0.335953
ENSMUSG00000002325	Irf9	167.772	0.270238	0.18986	1.42336	0.154633	0.417265
ENSMUSG00000002326	Gmpr2	455.509	-0.638103	0.179862	-3.54773	0.000388566	0.00620021
ENSMUSG00000002329	Mdp1	1098.03	-0.235572	0.12278	-1.91865	0.0550285	0.223689
ENSMUSG00000002332	Dhrs1	1487.96	-0.378419	0.106695	-3.54673	0.000390039	0.00621744
ENSMUSG00000002341	Ncan	22573	0.0759523	0.154749	0.490808	0.623562	0.836129
ENSMUSG00000002342	Tmem161a	966.421	0.0590885	0.242984	0.243178	0.807867	0.929481
ENSMUSG00000002343	Armc6	1738.87	-0.0535808	0.133349	-0.40181	0.687824	0.868365
ENSMUSG00000002345	Borcs8	413.015	-0.0573461	0.152964	-0.3749	0.707735	0.878221
ENSMUSG00000002346	Slc25a42	570.533	-0.0729645	0.121629	-0.599895	0.548576	0.788255
ENSMUSG00000002365	Snx9	206.88	0.130496	0.181631	0.718467	0.472469	0.741127
ENSMUSG00000002372	Ranbp3	1908.13	0.0898766	0.0979159	0.917895	0.358674	0.645898
ENSMUSG00000002379	Ndufa11	978.125	-0.308581	0.131461	-2.34732	0.0189091	0.110656
ENSMUSG00000002384	Bmp8b	12.0424	-0.147851	0.710843	-0.207995	0.835233	NA
ENSMUSG00000002393	Nr2f6	636.87	-0.363239	0.233733	-1.55408	0.120165	0.360587
ENSMUSG00000002395	Use1	854.058	-0.170174	0.14548	-1.16974	0.242105	0.532705
ENSMUSG00000002396	Ocel1	357.34	0.223501	0.172197	1.29794	0.194308	0.473508
ENSMUSG00000002409	Dyrk1b	355.246	0.364735	0.149907	2.43309	0.0149708	0.0939994
ENSMUSG00000002413	Braf	2043	-0.141647	0.282889	-0.500716	0.616571	0.831038
ENSMUSG00000002416	Ndufb2	830.166	-0.0856398	0.171913	-0.498157	0.618374	0.832333
ENSMUSG00000002428	Hltf	477.704	-0.366075	0.16506	-2.21783	0.0265664	0.139107
ENSMUSG00000002455	Prpf6	1343.15	0.174994	0.146917	1.19111	0.23361	0.522932
ENSMUSG00000002458	Rgs19	544.546	-0.206919	0.158235	-1.30767	0.190986	0.469843
ENSMUSG00000002459	Rgs20	388.961	-0.8036	0.167764	-4.79006	1.66734e-06	7.27059e-05
ENSMUSG00000002475	Abhd3	353.644	-0.16896	0.161201	-1.04814	0.294576	0.588594
ENSMUSG00000002477	Snrpd1	731.968	0.159594	0.141954	1.12427	0.2609	0.554557
ENSMUSG00000002486	Tchp	242.238	-0.421995	0.214034	-1.97162	0.0486526	0.206911
ENSMUSG00000002489	Tiam1	1910.04	0.629254	0.294596	2.13599	0.03268	0.159215
ENSMUSG00000002496	Tsc2	2946.33	0.0206492	0.25911	0.0796928	0.936482	0.978679
ENSMUSG00000002500	Rpl3l	2.91331	1.4217	1.38325	1.0278	0.304045	NA
ENSMUSG00000002504	Slc9a3r2	893.628	-0.15129	0.126222	-1.1986	0.230683	0.519044
ENSMUSG00000002524	Puf60	2698.87	-0.0849987	0.13281	-0.640003	0.522171	0.771159
ENSMUSG00000002546	Golga2	2246.16	0.186829	0.0989227	1.88864	0.0589406	0.23471
ENSMUSG00000002550	Uck1	1445.07	-0.0531334	0.127011	-0.418338	0.6757	0.862976
ENSMUSG00000002565	Scin	0.986992	-0.977129	2.28063	-0.428446	0.668326	NA
ENSMUSG00000002578	Ikzf4	752.325	-0.154611	0.246341	-0.627629	0.530247	0.77583
ENSMUSG00000002580	Mien1	1429.79	-0.104172	0.133681	-0.779262	0.435825	0.711644
ENSMUSG00000002602	Axl	852.133	0.350291	0.235419	1.48795	0.136764	0.390272
ENSMUSG00000002603	Tgfb1	10.0438	0.349355	0.735891	0.474737	0.634975	NA
ENSMUSG00000002608	Ccdc97	964.804	-0.12811	0.15664	-0.81786	0.413437	0.693913
ENSMUSG00000002617	Zfp40	713.133	0.0469367	0.284512	0.164973	0.868965	0.954535
ENSMUSG00000002625	Akap8l	1055.2	-0.137741	0.105725	-1.30282	0.192636	0.471625
ENSMUSG00000002633	Shh	25.0973	0.0559288	0.473153	0.118205	0.905906	0.969125
ENSMUSG00000002635	Pdcd2l	361.073	-0.0682286	0.192888	-0.353722	0.723547	0.886046
ENSMUSG00000002658	Gtf2f1	1646.27	0.0843925	0.128208	0.658247	0.51038	0.763837
ENSMUSG00000002660	Clpp	900.298	-0.246995	0.183309	-1.34742	0.177843	0.451787
ENSMUSG00000002661	Alkbh7	281.326	-0.0952998	0.170987	-0.55735	0.577288	0.808614
ENSMUSG00000002664	Pspn	6.2265	-0.210125	0.830997	-0.252859	0.800377	NA
ENSMUSG00000002668	Dennd1c	8.25813	0.56458	1.18632	0.475908	0.63414	NA
ENSMUSG00000002679	Med6	266.102	-0.0435043	0.217068	-0.200417	0.841154	0.943012
ENSMUSG00000002688	Prkd1	283.884	-0.32976	0.165715	-1.98992	0.0465997	0.201703
ENSMUSG00000002699	Lcp2	143.264	-0.866331	0.535704	-1.61718	0.105839	0.333783
ENSMUSG00000002718	Cse1l	2359.49	-0.16701	0.0930007	-1.79579	0.0725273	0.266304
ENSMUSG00000002728	Naa20	837.258	0.111374	0.150033	0.74233	0.457888	0.72901
ENSMUSG00000002731	Prkra	1082.59	-0.236314	0.119538	-1.97688	0.0480546	0.205361
ENSMUSG00000002732	Fkbp7	19.9091	-0.291271	0.601099	-0.484565	0.627985	0.838089
ENSMUSG00000002733	Plekha3	567.2	0.129998	0.127064	1.02309	0.306264	0.599759
ENSMUSG00000002741	Ykt6	4544.4	-0.0758559	0.131507	-0.576819	0.564062	0.798403
ENSMUSG00000002748	Baz1b	2019.7	0.233804	0.119436	1.95757	0.0502808	0.210777
ENSMUSG00000002763	Pex6	1312.78	-0.196952	0.160908	-1.224	0.220953	0.507393
ENSMUSG00000002767	Mrpl2	493.336	-0.360518	0.255931	-1.40865	0.158938	0.422758
ENSMUSG00000002768	Mea1	1760	-0.129101	0.119989	-1.07594	0.281954	0.575838
ENSMUSG00000002769	Gnmt	2.67838	-1.59948	1.45128	-1.10211	0.270413	NA
ENSMUSG00000002771	Grin2d	847.267	-0.0644851	0.139365	-0.462707	0.643574	0.845793
ENSMUSG00000002778	Kdelr1	1886.14	0.11205	0.0944891	1.18585	0.235683	0.525778
ENSMUSG00000002781	Tmem143	510.654	-0.356562	0.25196	-1.41515	0.157024	0.420848
ENSMUSG00000002791	Pdxk-ps	1.89223	0.28857	1.72846	0.166952	0.867408	NA
ENSMUSG00000002797	Ggct	259.713	-0.224036	0.199645	-1.12217	0.261789	0.555204
ENSMUSG00000002799	Jag2	1211.46	0.445927	0.116534	3.82657	0.000129939	0.00263355
ENSMUSG00000002803	Btbd6	818.121	0.0252885	0.146111	0.173077	0.862591	0.951495
ENSMUSG00000002804	Nudt14	313.707	0.103322	0.223395	0.462507	0.643718	0.845875
ENSMUSG00000002808	Epdr1	1344.51	-0.238131	0.120992	-1.96815	0.0490505	0.207988
ENSMUSG00000002812	Flii	1532.81	-0.123569	0.162381	-0.760984	0.446666	0.719124
ENSMUSG00000002814	Top3a	87.8835	0.0704823	0.259684	0.271416	0.786071	0.918553
ENSMUSG00000002820	Atg4d	433.484	0.171554	0.165645	1.03568	0.300353	0.593841
ENSMUSG00000002825	Qtrt1	229.876	-0.224928	0.215331	-1.04457	0.296222	0.58996
ENSMUSG00000002831	Plin4	6.2171	0.291527	1.04495	0.278986	0.780256	NA
ENSMUSG00000002833	Hdgfl2	1440.72	-0.182356	0.159766	-1.14139	0.253706	0.547167
ENSMUSG00000002835	Chaf1a	225.341	0.433186	0.278443	1.55574	0.119769	0.360081
ENSMUSG00000002844	Adprh	2014.32	0.0476773	0.15917	0.299537	0.76453	0.908394
ENSMUSG00000002845	Tmem39a	164.179	0.0820255	0.213456	0.384273	0.700776	0.875017
ENSMUSG00000002846	Timmdc1	400.408	-0.238596	0.143	-1.6685	0.0952162	0.312822
ENSMUSG00000002847	Pla1a	1.28437	-2.96963	2.48764	-1.19375	0.232574	NA
ENSMUSG00000002870	Mcm2	320.735	-0.192205	0.204608	-0.939385	0.347533	0.636555
ENSMUSG00000002871	Tpra1	377.469	0.0140735	0.25379	0.0554533	0.955777	0.984445
ENSMUSG00000002881	Nab1	794.642	0.309446	0.170472	1.81523	0.0694884	0.259397
ENSMUSG00000002885	Adgre5	42.0616	-0.205676	0.377546	-0.54477	0.585911	0.813027
ENSMUSG00000002897	Il17ra	70.0303	-0.351677	0.342672	-1.02628	0.30476	0.598369
ENSMUSG00000002900	Lamb1	699.755	-0.324422	0.220105	-1.47394	0.140497	0.396352
ENSMUSG00000002908	Kcnn1	606.876	-0.0914966	0.176991	-0.516957	0.605186	0.823995
ENSMUSG00000002910	Arrdc2	395.521	-0.468342	0.209789	-2.23245	0.0255855	0.135855
ENSMUSG00000002930	Ppp1r17	4.70436	0.753018	1.02098	0.737541	0.460794	NA
ENSMUSG00000002944	Cd36	123.67	-1.77183	0.279172	-6.34674	2.19929e-10	3.25352e-08
ENSMUSG00000002948	Map2k7	1117.12	0.373466	0.192205	1.94306	0.052009	0.215229
ENSMUSG00000002949	Timm44	769.335	0.0712591	0.179668	0.396615	0.691651	0.870404
ENSMUSG00000002957	Ap2a2	9347.11	-0.0215197	0.126163	-0.170571	0.864561	0.952787
ENSMUSG00000002963	Pnkp	378.803	-0.349219	0.175171	-1.99359	0.0461966	0.200451
ENSMUSG00000002968	Med25	2009.86	0.121731	0.119103	1.02207	0.306748	0.600039
ENSMUSG00000002980	Bcam	85.8346	-0.67463	0.359237	-1.87795	0.0603874	0.237833
ENSMUSG00000002981	Clptm1	5202.67	0.159711	0.0878726	1.81753	0.0691354	0.258785
ENSMUSG00000002983	Relb	91.2014	0.0640495	0.301813	0.212216	0.831939	0.940155
ENSMUSG00000002984	Tomm40	1540.77	-0.530407	0.175417	-3.02369	0.00249715	0.0262466
ENSMUSG00000002985	Apoe	20472.9	-0.590665	0.160647	-3.6768	0.000236181	0.00414246
ENSMUSG00000002996	Hbp1	441.891	-0.105939	0.139857	-0.757484	0.44876	0.720794
ENSMUSG00000002997	Prkar2b	5716.63	-0.150272	0.0928718	-1.61806	0.105649	0.333397
ENSMUSG00000003031	Cdkn1b	1975.54	0.0595952	0.113202	0.52645	0.598575	0.819198
ENSMUSG00000003032	Klf4	55.2075	-0.403465	0.503017	-0.80209	0.422501	0.701032
ENSMUSG00000003033	Ap1m1	2840.92	0.459789	0.109328	4.20558	2.60417e-05	0.000737412
ENSMUSG00000003037	Rab8a	1082.52	0.260015	0.124468	2.08901	0.0367067	0.172106
ENSMUSG00000003038	Hmgn2	4012.43	-0.00522659	0.12339	-0.0423581	0.966213	0.988516
ENSMUSG00000003039	Fam32a	2265.91	0.252945	0.113741	2.22388	0.0261568	0.137645
ENSMUSG00000003051	Elf3	0.636982	1.2943	2.60714	0.496444	0.619581	NA
ENSMUSG00000003062	Stard3nl	1626.48	-0.0851629	0.119765	-0.711085	0.477031	0.743495
ENSMUSG00000003068	Stk11	1667.96	-0.0673171	0.105052	-0.6408	0.521653	0.771159
ENSMUSG00000003070	Efna2	343.946	-0.320275	0.174024	-1.84041	0.0657088	0.250869
ENSMUSG00000003072	Atp5d	3928.38	-0.14223	0.14083	-1.00994	0.312523	0.605721
ENSMUSG00000003099	Ppp5c	2401.06	-0.0780729	0.115438	-0.676321	0.498837	0.75614
ENSMUSG00000003119	Cdk12	612.192	-0.214648	0.221705	-0.968173	0.332958	0.623399
ENSMUSG00000003123	Lipe	246.531	0.11701	0.242527	0.482461	0.629478	0.838934
ENSMUSG00000003131	Pafah1b2	6807.72	0.313094	0.124174	2.52142	0.0116881	0.0790258
ENSMUSG00000003134	Tbc1d8	521.073	0.724665	0.163489	4.43251	9.31444e-06	0.000315714
ENSMUSG00000003135	Cnot11	724.903	0.0442556	0.178758	0.247573	0.804465	0.927516
ENSMUSG00000003153	Slc2a3	5381.66	0.0463752	0.107594	0.431021	0.666453	0.85796
ENSMUSG00000003154	Foxj2	1391.53	-0.100954	0.183684	-0.549608	0.582588	0.811322
ENSMUSG00000003161	Sri	1213.94	0.0550286	0.139975	0.393131	0.694222	0.871321
ENSMUSG00000003166	Dgcr2	5190.44	0.00267884	0.101319	0.0264397	0.978907	0.992259
ENSMUSG00000003184	Irf3	165.777	-0.17845	0.269547	-0.662037	0.507947	0.76233
ENSMUSG00000003190	Bcl2l12	27.8171	-0.293911	0.411452	-0.714326	0.475026	0.742215
ENSMUSG00000003198	Zfp959	106.532	-0.223942	0.227767	-0.983209	0.325505	0.617705
ENSMUSG00000003199	Mpnd	1365.2	-0.208252	0.11491	-1.81231	0.069938	0.26036
ENSMUSG00000003200	Sh3gl1	1342.31	-0.0258528	0.124788	-0.207174	0.835874	0.941744
ENSMUSG00000003206	Ebi3	38.5213	0.579929	0.369829	1.5681	0.116857	0.354967
ENSMUSG00000003208	Yju2	168.102	-0.432925	0.235953	-1.8348	0.0665359	0.252682
ENSMUSG00000003226	Ranbp2	2260.4	0.0274346	0.197494	0.138914	0.889518	0.963563
ENSMUSG00000003227	Edar	3.93193	-1.07987	1.0661	-1.01291	0.311103	NA
ENSMUSG00000003228	Grk5	307.26	-0.048781	0.156559	-0.311582	0.755358	0.903689
ENSMUSG00000003233	Dvl3	2434.86	-0.674314	0.104403	-6.45878	1.05549e-10	1.74036e-08
ENSMUSG00000003234	Abcf3	1235.41	-0.1702	0.145598	-1.16898	0.242413	0.532865
ENSMUSG00000003235	Eif2b5	2017.3	-0.251848	0.114976	-2.19044	0.0284924	0.145111
ENSMUSG00000003269	Cyth2	1887.63	0.109814	0.136469	0.804678	0.421006	0.700308
ENSMUSG00000003271	Sult2b1	126.616	-0.454883	0.265534	-1.71309	0.0866964	0.296725
ENSMUSG00000003273	Car11	990.123	-0.38636	0.175258	-2.20452	0.0274875	0.141838
ENSMUSG00000003279	Dlgap1	5768.1	0.450181	0.158106	2.84734	0.00440863	0.0395018
ENSMUSG00000003282	Plag1	18.2429	0.905082	0.632891	1.43008	0.152695	0.414725
ENSMUSG00000003283	Hck	72.4863	-0.0106171	0.338826	-0.031335	0.975002	0.990967
ENSMUSG00000003299	Mrpl4	662.022	-0.0188054	0.181665	-0.103517	0.917553	0.971956
ENSMUSG00000003308	Keap1	1643.71	-0.0722103	0.203039	-0.355647	0.722105	0.885462
ENSMUSG00000003309	Ap1m2	30.158	-0.05706	0.533645	-0.106925	0.914848	0.97137
ENSMUSG00000003316	Glg1	6742.88	0.217628	0.132789	1.63889	0.101235	0.324843
ENSMUSG00000003341	Atp8b3	5.64427	0.29453	0.880737	0.334413	0.738068	NA
ENSMUSG00000003344	Btbd2	2707.92	0.109734	0.0956248	1.14754	0.251157	0.543927
ENSMUSG00000003345	Csnk1g2	2568.68	0.21466	0.0960449	2.23499	0.0254177	0.135467
ENSMUSG00000003346	Abhd17a	3095.33	-0.19885	0.152474	-1.30416	0.19218	0.471326
ENSMUSG00000003348	Mob3a	1363.05	0.454542	0.163027	2.78815	0.00530105	0.0451859
ENSMUSG00000003352	Cacnb3	4077.74	0.407186	0.101456	4.0134	5.98496e-05	0.00143106
ENSMUSG00000003354	Ccdc65	228.12	-0.00811978	0.173559	-0.046784	0.962685	0.986876
ENSMUSG00000003355	Fkbp11	30.6477	-0.208496	0.394502	-0.528504	0.597149	0.818025
ENSMUSG00000003360	Ddx23	1490.78	-0.0800024	0.204546	-0.391121	0.695708	0.871575
ENSMUSG00000003363	Pld3	6760.2	-0.362477	0.0903526	-4.0118	6.02574e-05	0.00143431
ENSMUSG00000003378	Grik5	5843.53	0.121321	0.108544	1.11771	0.26369	0.557714
ENSMUSG00000003380	Rabac1	2466.87	-0.330401	0.140151	-2.35747	0.0183998	0.108556
ENSMUSG00000003382	Etv3	417.596	0.161058	0.129234	1.24625	0.212673	0.496066
ENSMUSG00000003402	Prkcsh	2254.28	-0.0793137	0.113756	-0.697224	0.485663	0.748726
ENSMUSG00000003410	Elavl3	14074.2	0.317034	0.0992284	3.195	0.00139833	0.0168963
ENSMUSG00000003411	Rab3b	2796.82	0.279382	0.110673	2.52438	0.0115902	0.0784692
ENSMUSG00000003418	St8sia6	38.0347	0.423916	0.486761	0.870892	0.383813	0.669611
ENSMUSG00000003420	Fcgrt	138.471	-2.93918	0.267655	-10.9812	4.70575e-28	1.0641e-24
ENSMUSG00000003421	Nosip	894.722	-0.232955	0.181811	-1.2813	0.200087	0.481074
ENSMUSG00000003423	Pih1d1	828.713	-0.153338	0.151446	-1.01249	0.311302	0.604911
ENSMUSG00000003429	Rps11	3032.25	-0.180915	0.10563	-1.71273	0.0867627	0.296816
ENSMUSG00000003435	Supt5	3452.98	-0.222049	0.152221	-1.45873	0.144639	0.40315
ENSMUSG00000003436	Dll3	59.9522	-0.931804	0.346019	-2.69293	0.00708274	0.0557856
ENSMUSG00000003437	Paf1	1147.34	0.305211	0.153969	1.98229	0.0474473	0.203584
ENSMUSG00000003438	Timm50	817.984	0.0127141	0.151479	0.0839329	0.93311	0.977689
ENSMUSG00000003444	Med29	345.215	-0.240246	0.188197	-1.27656	0.201756	0.482708
ENSMUSG00000003452	Bicd1	1360.64	0.408428	0.221582	1.84324	0.0652944	0.250192
ENSMUSG00000003458	Ncstn	2084.74	0.0142628	0.0987097	0.144492	0.885112	0.961286
ENSMUSG00000003464	Pex19	2883.42	-0.00538061	0.0892841	-0.0602639	0.951945	0.982758
ENSMUSG00000003469	Phyhip	3381.3	-0.094109	0.121655	-0.773571	0.439184	0.714182
ENSMUSG00000003476	Crhr2	68.2466	-0.18139	0.317453	-0.57139	0.567735	0.801312
ENSMUSG00000003484	Cyp4f18	0.762979	0.0509295	2.4643	0.0206669	0.983511	NA
ENSMUSG00000003500	Impdh1	3370.87	0.226737	0.100957	2.24587	0.0247121	0.132375
ENSMUSG00000003518	Dusp3	2028.54	0.174715	0.131732	1.32629	0.184743	0.461772
ENSMUSG00000003526	Prodh	113.111	-0.40531	0.253458	-1.59912	0.109793	0.340804
ENSMUSG00000003527	Ess2	675.486	0.0778397	0.134733	0.577735	0.563443	0.798147
ENSMUSG00000003528	Slc25a1	4074.92	-0.0221455	0.0915068	-0.242009	0.808773	0.929793
ENSMUSG00000003531	Dgcr6	1194.65	-0.314822	0.1304	-2.41428	0.0157664	0.0973667
ENSMUSG00000003534	Ddr1	1974.19	0.151871	0.12077	1.25752	0.208564	0.490034
ENSMUSG00000003541	Ier3	97.161	-0.0433545	0.272672	-0.158999	0.87367	0.956124
ENSMUSG00000003545	Fosb	102.107	-1.69908	0.317627	-5.3493	8.82943e-08	6.38179e-06
ENSMUSG00000003546	Klc4	386.451	-0.221262	0.137848	-1.60511	0.10847	0.338451
ENSMUSG00000003549	Ercc1	280.468	0.0133289	0.177801	0.0749653	0.940242	0.978811
ENSMUSG00000003555	Cyp17a1	1.76751	1.37128	2.27243	0.603441	0.546216	NA
ENSMUSG00000003559	As3mt	5.99136	-0.54341	0.955707	-0.568594	0.569631	NA
ENSMUSG00000003573	Homer3	220.47	-0.169398	0.247975	-0.683123	0.494529	0.754424
ENSMUSG00000003575	Crtc1	3995.6	0.307297	0.172563	1.78078	0.0749483	0.27127
ENSMUSG00000003581	Rnf215	798.858	-0.168017	0.165925	-1.01261	0.311249	0.604911
ENSMUSG00000003585	Sec14l2	271.608	0.388472	0.244093	1.5915	0.111498	0.344439
ENSMUSG00000003604	Aven	178.828	-0.367906	0.202894	-1.81329	0.0697873	0.260104
ENSMUSG00000003617	Cp	33.1932	-1.42753	0.617442	-2.312	0.0207778	0.118009
ENSMUSG00000003623	Crot	1350.84	-0.092467	0.117337	-0.788048	0.430669	0.70713
ENSMUSG00000003644	Rps6ka1	332.433	-0.0651857	0.330038	-0.19751	0.843429	0.943641
ENSMUSG00000003657	Calb2	1172.38	-0.611285	0.106052	-5.76401	8.214e-09	7.8939e-07
ENSMUSG00000003660	Snrnp200	4080.58	-0.106881	0.111916	-0.955012	0.339572	0.629548
ENSMUSG00000003662	Ciao1	911.714	0.0896017	0.126673	0.707344	0.479353	0.744403
ENSMUSG00000003665	Has1	3.95301	0.572995	1.07229	0.534365	0.593089	NA
ENSMUSG00000003680	Taf6l	368.585	-0.152258	0.205127	-0.742261	0.457929	0.72901
ENSMUSG00000003721	Insig2	693.054	0.843653	0.216291	3.90054	9.59767e-05	0.00208682
ENSMUSG00000003731	Kpna6	3555.74	0.356142	0.181264	1.96477	0.0494412	0.208738
ENSMUSG00000003746	Man1a	308.413	-0.466196	0.1634	-2.85309	0.00432962	0.0389886
ENSMUSG00000003752	Itpkc	260.632	-0.0224832	0.212502	-0.105802	0.915739	0.971656
ENSMUSG00000003762	Coq8b	443.722	0.239055	0.190536	1.25465	0.209607	0.491278
ENSMUSG00000003778	Brd8	1035.45	-0.0490971	0.134068	-0.36621	0.714208	0.880817
ENSMUSG00000003779	Kif20a	62.601	0.91848	0.365627	2.51206	0.0120027	0.0805729
ENSMUSG00000003808	Farsa	1167.2	-0.085943	0.143913	-0.597189	0.550381	0.789129
ENSMUSG00000003809	Gcdh	520.849	0.484198	0.175894	2.75279	0.00590902	0.0487935
ENSMUSG00000003810	Mast2	3381.7	0.0721372	0.179716	0.401396	0.688129	0.868681
ENSMUSG00000003812	Dnase2a	156.096	0.577052	0.225493	2.55907	0.0104954	0.0733797
ENSMUSG00000003813	Rad23a	972.784	-0.307414	0.152108	-2.02102	0.0432776	0.192098
ENSMUSG00000003814	Calr	7741.07	0.115778	0.0906655	1.27698	0.201609	0.482611
ENSMUSG00000003824	Syce2	266.346	0.0326462	0.158732	0.205669	0.837049	0.942248
ENSMUSG00000003847	Nfat5	822.772	0.0988114	0.689888	0.143228	0.88611	0.961469
ENSMUSG00000003848	Nob1	573.211	-0.0956401	0.203735	-0.469433	0.63876	0.843833
ENSMUSG00000003849	Nqo1	20.1911	-0.29462	0.515967	-0.571006	0.567996	0.80132
ENSMUSG00000003863	Ppfia3	4575.37	0.025175	0.12852	0.195885	0.844701	0.94413
ENSMUSG00000003865	Gys1	1708.55	-0.128654	0.148287	-0.8676	0.385613	0.671107
ENSMUSG00000003868	Ruvbl2	1142.56	-0.191064	0.256758	-0.744143	0.45679	0.728561
ENSMUSG00000003872	Lin7b	872.794	-0.133358	0.1349	-0.988565	0.322876	0.615652
ENSMUSG00000003873	Bax	1453.9	-0.139373	0.159766	-0.872363	0.383011	0.669115
ENSMUSG00000003882	Il7r	0.647184	-0.435987	2.617	-0.166598	0.867686	NA
ENSMUSG00000003923	Tfam	834.628	0.00859475	0.148807	0.0577578	0.953942	0.983531
ENSMUSG00000003929	Zfp81	1098.66	0.241772	0.167864	1.44029	0.149786	0.411055
ENSMUSG00000003934	Efnb3	9826.12	0.0260841	0.0962126	0.271109	0.786307	0.918625
ENSMUSG00000003948	Mmd	3550.23	-0.183767	0.0971493	-1.89159	0.0585453	0.233723
ENSMUSG00000003949	Hlf	422.862	-0.117885	0.243176	-0.484773	0.627837	0.838089
ENSMUSG00000003955	Fam162a	1011.01	-0.0991887	0.145171	-0.683253	0.494447	0.754371
ENSMUSG00000003970	Rpl8	5580.29	-0.0940082	0.122869	-0.765111	0.444205	0.717263
ENSMUSG00000003974	Grm3	1082.1	-0.415599	0.149209	-2.78534	0.00534709	0.0454104
ENSMUSG00000003992	Ssbp2	4502.09	0.249894	0.10696	2.33634	0.0194736	0.112829
ENSMUSG00000004018	Fancl	235.567	-0.527727	0.241978	-2.18089	0.0291916	0.14758
ENSMUSG00000004031	Brinp2	2942.81	-0.465682	0.111216	-4.18717	2.82453e-05	0.000792503
ENSMUSG00000004032	Gstm5	1582.53	-0.258673	0.12218	-2.11714	0.0342477	0.164568
ENSMUSG00000004035	Gstm7	164.955	-0.260149	0.22259	-1.16874	0.24251	0.533003
ENSMUSG00000004040	Stat3	1577.64	-0.0998983	0.146435	-0.682202	0.495111	0.754532
ENSMUSG00000004043	Stat5a	5.59006	1.18095	1.0667	1.10711	0.268248	NA
ENSMUSG00000004044	Cavin1	80.3431	-0.375174	0.262418	-1.42968	0.152808	0.41496
ENSMUSG00000004054	Map3k11	242.805	0.159976	0.171873	0.930782	0.351966	0.64045
ENSMUSG00000004056	Akt2	1677.72	-0.0755323	0.101806	-0.741926	0.458132	0.729096
ENSMUSG00000004069	Dnaja3	1685.17	-0.597244	0.111477	-5.35756	8.43513e-08	6.12476e-06
ENSMUSG00000004070	Hmox2	1184.29	-0.0823308	0.12921	-0.637188	0.524003	0.772193
ENSMUSG00000004071	Cdip1	2944.73	-0.190438	0.0966914	-1.96954	0.0488908	0.207521
ENSMUSG00000004085	Map3k20	274.015	-0.322911	0.179166	-1.8023	0.0714979	0.263686
ENSMUSG00000004096	Cwc15	980.071	0.0702595	0.143485	0.489663	0.624372	0.836466
ENSMUSG00000004098	Col5a3	34.7156	-0.465352	0.405479	-1.14766	0.251109	0.543897
ENSMUSG00000004099	Dnmt1	2548.46	0.456166	0.151728	3.00648	0.00264292	0.027343
ENSMUSG00000004100	Ppan	356.055	-0.272839	0.164002	-1.66364	0.0961847	0.315219
ENSMUSG00000004105	Angptl2	97.6862	0.778686	0.279972	2.7813	0.00541416	0.0457315
ENSMUSG00000004110	Cacna1e	5852	0.0213738	0.274894	0.0777528	0.938025	0.978811
ENSMUSG00000004113	Cacna1b	5722.91	0.0459557	0.174047	0.264042	0.791747	0.920909
ENSMUSG00000004127	Trmt10a	166.366	-0.195285	0.280707	-0.69569	0.486623	0.749733
ENSMUSG00000004151	Etv1	1177.35	-0.27726	0.213157	-1.30073	0.19335	0.471957
ENSMUSG00000004187	Kifc2	6290.21	0.259222	0.105033	2.46802	0.0135862	0.0882102
ENSMUSG00000004207	Psap	37760.5	0.151844	0.108756	1.3962	0.162655	0.428439
ENSMUSG00000004221	Ikbkg	1167.65	0.0448572	0.148548	0.301971	0.762674	0.907347
ENSMUSG00000004231	Pax2	5.52343	-0.655706	0.943549	-0.694936	0.487095	NA
ENSMUSG00000004233	Wars2	217.182	-0.568077	0.30175	-1.8826	0.059754	0.236817
ENSMUSG00000004263	Atn1	5612.03	-0.0175953	0.157954	-0.111395	0.911303	0.970547
ENSMUSG00000004264	Phb2	2227.35	-0.0557428	0.110126	-0.506173	0.612735	0.828548
ENSMUSG00000004266	Ptpn6	21.5735	-4.09867	2.09184	-1.95936	0.0500702	0.21034
ENSMUSG00000004267	Eno2	4847	-0.412048	0.120624	-3.41596	0.000635586	0.0090892
ENSMUSG00000004268	Emg1	579.309	-0.212344	0.141579	-1.49983	0.13366	0.385514
ENSMUSG00000004270	Lpcat3	698.327	-0.0656435	0.16507	-0.397672	0.690872	0.870051
ENSMUSG00000004285	Atp6v1f	1922.98	-0.103432	0.140269	-0.737379	0.460892	0.731228
ENSMUSG00000004317	Clcn5	664.853	-0.801049	0.193379	-4.14237	3.43736e-05	0.000917538
ENSMUSG00000004319	Clcn3	6192.61	0.00852589	0.120737	0.0706152	0.943704	0.979984
ENSMUSG00000004328	Hif3a	362.702	0.994986	0.175477	5.67017	1.42657e-08	1.29251e-06
ENSMUSG00000004341	Gpx6	0.817304	-2.85919	2.78871	-1.02527	0.305234	NA
ENSMUSG00000004347	Pde1c	70.8923	-0.235355	0.301444	-0.780759	0.434945	0.711103
ENSMUSG00000004356	Utp20	516.917	0.315144	0.180262	1.74826	0.0804198	0.283007
ENSMUSG00000004360	9330159F19Rik	2635.9	0.592633	0.158644	3.73562	0.000187254	0.00348711
ENSMUSG00000004364	Cul3	3126.45	-0.124821	0.139811	-0.892784	0.371973	0.658314
ENSMUSG00000004366	Sst	1409.13	-1.00885	0.113044	-8.92439	4.48164e-19	3.73368e-16
ENSMUSG00000004371	Il11	11.3495	-0.101264	0.801974	-0.126268	0.899519	NA
ENSMUSG00000004383	Large1	4980.48	-0.303761	0.0943767	-3.2186	0.00128818	0.0157757
ENSMUSG00000004393	Ddx56	909.239	-0.149777	0.125002	-1.19819	0.230843	0.519257
ENSMUSG00000004394	Tmed4	1216.03	0.0797418	0.144957	0.550108	0.582245	0.811322
ENSMUSG00000004415	Col26a1	878.237	-0.685651	0.167506	-4.09328	4.25318e-05	0.00109114
ENSMUSG00000004446	Bid	602.489	-0.31937	0.163011	-1.9592	0.0500899	0.210367
ENSMUSG00000004451	Ralb	1007.43	0.0527142	0.112514	0.468513	0.639418	0.843978
ENSMUSG00000004455	Ppp1cc	1869.96	0.227681	0.135847	1.67602	0.093735	0.310264
ENSMUSG00000004460	Dnajb11	1326.54	-0.161459	0.112354	-1.43706	0.150702	0.411761
ENSMUSG00000004462	Tbccd1	291.904	-0.183399	0.25569	-0.717271	0.473207	0.741475
ENSMUSG00000004473	Clec11a	53.7557	-0.00879681	0.29774	-0.0295453	0.97643	0.991433
ENSMUSG00000004500	Zfp324	506.573	0.250754	0.281252	0.891563	0.372627	0.659177
ENSMUSG00000004508	Gab2	1533.4	-0.0133144	0.149746	-0.0889134	0.929151	0.976379
ENSMUSG00000004530	Coro1c	3850.71	0.42051	0.132921	3.1636	0.00155833	0.0182798
ENSMUSG00000004535	Tax1bp1	3247.67	-0.221261	0.104895	-2.10935	0.0349147	0.166415
ENSMUSG00000004558	Ndrg2	7709.08	-0.197231	0.0869615	-2.26803	0.0233274	0.127459
ENSMUSG00000004561	Mettl17	397.428	0.048204	0.216869	0.222272	0.824102	0.936032
ENSMUSG00000004562	Arhgef40	532.392	0.339803	0.213404	1.5923	0.111317	0.344081
ENSMUSG00000004565	Pnpla6	1560.21	-0.0816821	0.155863	-0.524065	0.600234	0.820404
ENSMUSG00000004567	Mcoln1	1435.75	0.185856	0.117362	1.58361	0.113283	0.347646
ENSMUSG00000004568	Arhgef18	1231.36	0.157036	0.133004	1.18068	0.237728	0.527918
ENSMUSG00000004591	Pkn2	601.447	0.241269	0.172478	1.39884	0.16186	0.427089
ENSMUSG00000004609	Cd33	1.37269	2.61877	2.11057	1.24078	0.214686	NA
ENSMUSG00000004610	Etfb	564.31	-0.369503	0.144044	-2.56521	0.0103114	0.072639
ENSMUSG00000004626	Stxbp2	596.942	0.189163	0.166454	1.13643	0.255777	0.548826
ENSMUSG00000004630	Pcp2	2.84757	1.45143	1.36952	1.05981	0.289231	NA
ENSMUSG00000004631	Sgce	453.95	-0.112439	0.167487	-0.671331	0.50201	0.757657
ENSMUSG00000004633	Chn2	962.841	-0.0939763	0.118873	-0.790561	0.4292	0.706155
ENSMUSG00000004637	Wwox	315.856	-0.730482	0.146173	-4.99737	5.81164e-07	3.11839e-05
ENSMUSG00000004642	Slbp	955.6	-0.321806	0.126058	-2.55284	0.010685	0.0742135
ENSMUSG00000004651	Tyr	5.10376	0.315183	0.973227	0.323853	0.746049	NA
ENSMUSG00000004654	Ghrhr	0.642159	2.67815	2.87846	0.93041	0.352159	NA
ENSMUSG00000004655	Aqp1	8.26872	0.465509	0.786119	0.592161	0.553743	NA
ENSMUSG00000004661	Arid3b	67.6666	-0.832673	0.368906	-2.25714	0.0239992	0.129919
ENSMUSG00000004665	Cnn2	34.5153	-0.0271507	0.435397	-0.0623586	0.950277	0.982427
ENSMUSG00000004667	Polr2e	1036.04	-0.284763	0.186909	-1.52353	0.127626	0.37522
ENSMUSG00000004668	Abca13	7.33514	0.0817631	0.789985	0.103499	0.917567	NA
ENSMUSG00000004677	Myo9b	857.112	0.52585	0.148954	3.53029	0.000415107	0.00653154
ENSMUSG00000004698	Hdac9	3040.21	-0.0568954	0.133913	-0.424867	0.670933	0.860033
ENSMUSG00000004709	Cd244a	0.54455	1.00127	3.08136	0.324945	0.745222	NA
ENSMUSG00000004730	Adgre1	4.86011	-0.268034	1.266	-0.211718	0.832327	NA
ENSMUSG00000004748	Mtfp1	444.48	-0.679484	0.155083	-4.38143	1.17903e-05	0.000381655
ENSMUSG00000004768	Rab23	1137	0.0412468	0.148436	0.277876	0.781107	0.915881
ENSMUSG00000004771	Rab11a	4945.86	-0.0478123	0.112737	-0.424106	0.671489	0.860126
ENSMUSG00000004788	Eif2b2	639.757	-0.0519773	0.203075	-0.255951	0.797989	0.924029
ENSMUSG00000004789	Dlst	3824.96	0.015846	0.0886991	0.178649	0.858213	0.950309
ENSMUSG00000004791	Pgf	37.8014	-0.474864	0.37035	-1.2822	0.199771	0.480574
ENSMUSG00000004798	Ulk2	6096.54	0.363241	0.112318	3.23403	0.00122057	0.0151059
ENSMUSG00000004814	Ccl24	2.40206	0.227876	1.31145	0.173758	0.862056	NA
ENSMUSG00000004815	Dgkq	877.73	0.537815	0.187575	2.86719	0.00414128	0.0378259
ENSMUSG00000004837	Grap	1.78266	-2.38731	1.74955	-1.36453	0.172401	NA
ENSMUSG00000004842	Pou1f1	1.02116	-0.311467	2.22975	-0.139687	0.888907	NA
ENSMUSG00000004843	Chmp2b	2332.87	-0.0954037	0.0988575	-0.965063	0.334514	0.625171
ENSMUSG00000004846	Plod3	727.545	-0.159251	0.143694	-1.10826	0.267749	0.561797
ENSMUSG00000004849	Ap1s1	3422.01	0.0887682	0.141895	0.625592	0.531582	0.776934
ENSMUSG00000004864	Mapk13	4.95243	-1.80359	1.0045	-1.7955	0.0725738	NA
ENSMUSG00000004865	Srpk1	1684.37	0.021443	0.11552	0.185621	0.852742	0.948211
ENSMUSG00000004880	Lbr	403.56	0.219084	0.330523	0.66284	0.507433	0.762209
ENSMUSG00000004885	Crabp2	1.72809	2.27971	1.88388	1.21011	0.226235	NA
ENSMUSG00000004891	Nes	1001.67	1.01889	0.130403	7.81341	5.56624e-15	1.95795e-12
ENSMUSG00000004892	Bcan	4561.68	0.0635934	0.0987593	0.643923	0.519625	0.770289
ENSMUSG00000004894	Hapln2	11.8948	-0.0810832	0.749725	-0.10815	0.913876	NA
ENSMUSG00000004895	Prcc	1340.49	0.161834	0.122234	1.32397	0.185515	0.462807
ENSMUSG00000004896	Rrnad1	275.404	0.424362	0.233245	1.81938	0.0688531	0.258081
ENSMUSG00000004897	Hdgf	3078.36	-0.0951806	0.145736	-0.653101	0.513691	0.766156
ENSMUSG00000004902	Slc25a18	242.868	0.537817	0.188	2.86072	0.0042268	0.0384296
ENSMUSG00000004929	Thop1	1607.04	-0.0662826	0.132892	-0.498772	0.61794	0.83215
ENSMUSG00000004931	Apba3	380.313	-0.478317	0.222792	-2.14692	0.0317995	0.156662
ENSMUSG00000004933	Matk	1888.11	-0.148143	0.12912	-1.14733	0.251246	0.54397
ENSMUSG00000004934	Pias4	605.944	-0.276235	0.211492	-1.30613	0.19151	0.47035
ENSMUSG00000004936	Map2k1	4381.76	-0.366593	0.098635	-3.71666	0.000201872	0.00368988
ENSMUSG00000004937	Sgta	3960.88	0.0120863	0.103863	0.116368	0.907361	0.969333
ENSMUSG00000004939	Nmrk2	2.88512	0.183397	1.43786	0.127548	0.898506	NA
ENSMUSG00000004945	Tmem242	850.088	-0.283398	0.151762	-1.86739	0.0618478	0.241649
ENSMUSG00000004947	Dtx2	257.092	-0.138805	0.200622	-0.691877	0.489015	0.751341
ENSMUSG00000004948	Zp3	0.739329	-0.0552181	2.86979	-0.0192412	0.984649	NA
ENSMUSG00000004951	Hspb1	1.26385	-1.00137	2.44563	-0.409453	0.682207	NA
ENSMUSG00000004952	Rasa4	96.2618	-0.630791	0.268232	-2.35167	0.0186896	0.109773
ENSMUSG00000004961	Syt5	5170.98	-0.0884814	0.0937891	-0.943408	0.345472	0.634689
ENSMUSG00000004980	Hnrnpa2b1	8452.29	-0.0985261	0.116399	-0.846454	0.3973	0.680759
ENSMUSG00000004988	Fxyd4	1.39648	0.585271	2.51853	0.232386	0.816238	NA
ENSMUSG00000004994	Ccdc130	282.997	-0.212314	0.184858	-1.14853	0.250751	0.543345
ENSMUSG00000004996	Mri1	141.874	-0.22873	0.212317	-1.07731	0.281344	0.575221
ENSMUSG00000005034	Prkacb	13813.9	0.195831	0.149199	1.31255	0.189335	0.467693
ENSMUSG00000005043	Sgsh	291.58	-0.625221	0.226918	-2.75527	0.00586435	0.0485496
ENSMUSG00000005045	Chd5	8943.13	0.481315	0.147402	3.26533	0.00109338	0.0139778
ENSMUSG00000005054	Cstb	333.42	-0.268123	0.201918	-1.32788	0.184218	0.460879
ENSMUSG00000005057	Sh2b2	433.158	-0.322275	0.264637	-1.2178	0.2233	0.509898
ENSMUSG00000005069	Pex5	2622.73	0.0614354	0.0945648	0.649665	0.515909	0.767426
ENSMUSG00000005078	Jkamp	1355.19	0.0616493	0.102068	0.604002	0.545842	0.786683
ENSMUSG00000005087	Cd44	432.624	-0.955196	0.205686	-4.64395	3.41816e-06	0.000134928
ENSMUSG00000005089	Slc1a2	19319.3	-0.375615	0.223255	-1.68245	0.092482	0.307783
ENSMUSG00000005102	Eif2ak4	572.266	-0.0269748	0.178831	-0.150839	0.880103	0.958586
ENSMUSG00000005103	Wdr1	6300.87	-0.0110285	0.127707	-0.0863575	0.931182	0.977013
ENSMUSG00000005107	Slc2a9	14.7999	0.24715	0.712376	0.346937	0.728638	0.88837
ENSMUSG00000005124	Ccn4	16.2702	-0.533175	0.693033	-0.769337	0.441694	0.71583
ENSMUSG00000005125	Ndrg1	4262.36	-0.0279076	0.103967	-0.268426	0.788371	0.919775
ENSMUSG00000005131	4930550C14Rik	7.35814	-2.18841	0.864818	-2.53049	0.0113902	NA
ENSMUSG00000005142	Man2b1	694.41	-0.354068	0.117191	-3.0213	0.00251695	0.0264196
ENSMUSG00000005148	Klf5	410.917	-0.0967068	0.143819	-0.672422	0.501315	0.757027
ENSMUSG00000005150	Wdr83	369.529	-0.00753071	0.183409	-0.0410596	0.967248	0.989247
ENSMUSG00000005161	Prdx2	7438.48	0.0338993	0.122068	0.277708	0.781237	0.915885
ENSMUSG00000005198	Polr2a	2526.57	0.156674	0.167638	0.934595	0.349997	0.638702
ENSMUSG00000005204	Senp3	1694.53	-0.258216	0.185726	-1.3903	0.164437	0.431154
ENSMUSG00000005220	Corin	4.08998	1.84122	1.18351	1.55573	0.119772	NA
ENSMUSG00000005225	Plekha8	388.792	-0.151064	0.143469	-1.05293	0.292371	0.586044
ENSMUSG00000005233	Spc25	86.8328	-0.00163478	0.280157	-0.00583522	0.995344	0.99821
ENSMUSG00000005237	Dnah2	115.086	1.21616	0.395699	3.07345	0.00211597	0.023179
ENSMUSG00000005251	Ripk4	12.8159	-0.479067	0.613545	-0.780819	0.434909	NA
ENSMUSG00000005262	Ufd1	1624.38	-0.497067	0.234194	-2.12246	0.0337993	0.16303
ENSMUSG00000005267	Zfp287	421.56	0.370212	0.13364	2.77023	0.00560173	0.0470614
ENSMUSG00000005268	Prlr	21.7109	0.440337	0.580131	0.75903	0.447835	0.720038
ENSMUSG00000005299	Letm1	2123.58	-0.119174	0.0894251	-1.33267	0.182641	0.45882
ENSMUSG00000005312	Ubqln1	5271.6	-0.0464901	0.1286	-0.36151	0.717718	0.882938
ENSMUSG00000005320	Fgfr4	1.67875	2.46168	2.26938	1.08474	0.278038	NA
ENSMUSG00000005338	Cadm3	25469.4	0.267714	0.104467	2.56265	0.0103875	0.0730125
ENSMUSG00000005354	Txn2	2123.42	0.0329866	0.240506	0.137155	0.890908	0.964217
ENSMUSG00000005357	Slc1a6	398.943	-0.477311	0.177148	-2.69442	0.00705119	0.0555843
ENSMUSG00000005360	Slc1a3	17499.4	0.0481678	0.100116	0.481118	0.630432	0.839558
ENSMUSG00000005362	Crbn	1114.82	0.133473	0.125542	1.06317	0.287704	0.581025
ENSMUSG00000005364	Il5ra	2.54424	0.213895	1.36177	0.157071	0.875189	NA
ENSMUSG00000005370	Msh6	683.555	0.153805	0.131381	1.17068	0.241729	0.532451
ENSMUSG00000005371	Fbxo11	2836.73	-0.0891258	0.110432	-0.807067	0.419628	0.699145
ENSMUSG00000005373	Mlxipl	10.9344	-0.609519	0.752863	-0.809602	0.418169	NA
ENSMUSG00000005374	Tbl2	1224.7	-0.00149196	0.101636	-0.0146795	0.988288	0.995869
ENSMUSG00000005378	Bud23	370.879	0.0345157	0.169027	0.204202	0.838196	0.942263
ENSMUSG00000005397	Nid1	26.4212	0.459419	0.479826	0.957469	0.33833	0.628338
ENSMUSG00000005410	Mcm5	146.033	1.13708	0.3264	3.48369	0.000494556	0.00754901
ENSMUSG00000005413	Hmox1	881.532	-0.754476	0.231339	-3.26135	0.00110884	0.014064
ENSMUSG00000005417	Mprip	6620.82	-0.180433	0.113832	-1.58509	0.112946	0.347095
ENSMUSG00000005442	Cic	8261.49	0.0012225	0.178948	0.00683157	0.994549	0.997887
ENSMUSG00000005447	Pafah1b3	1285.5	0.143295	0.140151	1.02243	0.306576	0.59989
ENSMUSG00000005465	Il27ra	10.9762	-0.251978	0.676613	-0.372411	0.709587	NA
ENSMUSG00000005469	Prkaca	5371.62	0.364638	0.0854378	4.26788	1.9734e-05	0.000588267
ENSMUSG00000005470	Asf1b	28.3088	0.675514	0.708138	0.95393	0.340119	0.630046
ENSMUSG00000005481	Ddx39a	402.984	0.0600826	0.193902	0.309861	0.756666	0.904276
ENSMUSG00000005483	Dnajb1	1106.68	0.0724279	0.106781	0.678284	0.497592	0.755995
ENSMUSG00000005493	Msh4	8.13248	0.750975	0.760448	0.987542	0.323377	NA
ENSMUSG00000005501	Usp40	301.012	0.162999	0.166532	0.978789	0.327684	0.619259
ENSMUSG00000005505	Kbtbd4	702.459	0.314867	0.116675	2.69867	0.00696181	0.0550488
ENSMUSG00000005506	Celf1	4725.52	0.461868	0.194741	2.3717	0.0177063	0.105525
ENSMUSG00000005510	Ndufs3	1506.71	-0.158253	0.12365	-1.27985	0.200598	0.481452
ENSMUSG00000005514	Por	2614.88	-0.0876298	0.0956017	-0.916613	0.359345	0.646505
ENSMUSG00000005533	Igf1r	1695.05	0.304709	0.227666	1.3384	0.180766	0.456079
ENSMUSG00000005534	Insr	1809.71	0.506639	0.463126	1.09396	0.273974	0.56891
ENSMUSG00000005540	Fcer2a	16.7989	-0.439468	0.53296	-0.82458	0.40961	0.691042
ENSMUSG00000005547	Cyp2a5	0.928156	0.961863	2.45771	0.391366	0.695527	NA
ENSMUSG00000005553	Atp4a	46.3929	-0.147426	0.38434	-0.383582	0.701288	0.875449
ENSMUSG00000005566	Trim28	4969.8	0.0199451	0.0938042	0.212625	0.83162	0.94013
ENSMUSG00000005575	Ube2m	2531.99	-0.13278	0.113871	-1.16606	0.24359	0.534126
ENSMUSG00000005580	Adcy9	617.784	0.201963	0.156358	1.29167	0.196472	0.475746
ENSMUSG00000005583	Mef2c	25111.9	0.732619	0.190336	3.84908	0.00011856	0.00246609
ENSMUSG00000005609	Ctr9	2085.79	0.378256	0.180336	2.09751	0.0359489	0.169757
ENSMUSG00000005610	Eif4g2	34578.7	0.0707061	0.102678	0.688621	0.491062	0.75266
ENSMUSG00000005615	Pcyt1a	1518.02	0.212628	0.117544	1.80892	0.0704633	0.261516
ENSMUSG00000005621	Zfp592	945.332	0.342079	0.263746	1.297	0.194631	0.47411
ENSMUSG00000005625	Psmd4	2162.93	-0.269592	0.155729	-1.73116	0.0834225	0.28996
ENSMUSG00000005628	Tmod4	1.52198	-0.285895	1.87797	-0.152236	0.879001	NA
ENSMUSG00000005640	Insrr	1.61324	-1.26296	1.67519	-0.753924	0.450895	NA
ENSMUSG00000005649	Cabp5	1.78088	1.35489	1.82051	0.744234	0.456735	NA
ENSMUSG00000005656	Snx6	1736.96	0.378617	0.159595	2.37236	0.0176749	0.105496
ENSMUSG00000005667	Mthfd2	1910.13	-0.353134	0.157199	-2.24641	0.0246779	0.132281
ENSMUSG00000005672	Kit	1214.79	0.26542	0.204654	1.29692	0.194658	0.47411
ENSMUSG00000005674	Tomm40l	1103.06	-0.301271	0.17091	-1.76274	0.0779437	0.277803
ENSMUSG00000005677	Nr1i3	5.2325	1.05739	1.18744	0.890475	0.373211	NA
ENSMUSG00000005681	Apoa2	10.338	-0.347002	0.675879	-0.513409	0.607665	NA
ENSMUSG00000005682	Pan2	417.986	0.0202536	0.171588	0.118036	0.906039	0.969125
ENSMUSG00000005683	Cs	9340.95	-0.230121	0.0915316	-2.51411	0.0119332	0.0802768
ENSMUSG00000005686	Ampd3	172.84	0.813854	0.449662	1.80992	0.0703075	0.261121
ENSMUSG00000005687	Bcas2	1662.61	0.0132034	0.157326	0.0839235	0.933117	0.977689
ENSMUSG00000005696	Sh2d1a	31.3273	-3.3734	1.86203	-1.81168	0.070036	0.260541
ENSMUSG00000005698	Ctcf	1524.27	0.193071	0.157601	1.22506	0.220553	0.507113
ENSMUSG00000005699	Pard6a	537.274	-0.19857	0.133382	-1.48873	0.136558	0.390135
ENSMUSG00000005705	Agrp	6.03406	0.799259	0.909711	0.878585	0.379626	NA
ENSMUSG00000005716	Pvalb	4.82379	-2.37786	1.20962	-1.96579	0.0493224	NA
ENSMUSG00000005718	Tfap4	114.897	0.18668	0.254763	0.732759	0.463706	0.73308
ENSMUSG00000005732	Ranbp1	1368.1	-0.0144304	0.106518	-0.135474	0.892237	0.965045
ENSMUSG00000005763	Cd247	7.37861	-0.89855	1.70043	-0.528425	0.597204	NA
ENSMUSG00000005774	Rfx5	339.708	-0.807694	0.272478	-2.96425	0.00303422	0.0302683
ENSMUSG00000005779	Psmb4	2871.79	-0.160013	0.103891	-1.5402	0.123513	0.367773
ENSMUSG00000005802	Slc30a4	1940.41	-0.0801761	0.135507	-0.591674	0.554069	0.791549
ENSMUSG00000005803	Sqor	19.9008	-0.57576	0.590493	-0.97505	0.329536	0.620712
ENSMUSG00000005804	Bloc1s6	1635.61	0.176515	0.109569	1.611	0.107181	0.335953
ENSMUSG00000005813	Metap1	1155.26	-0.656914	0.120599	-5.44711	5.11948e-08	4.05644e-06
ENSMUSG00000005823	Gpr108	238.257	-0.1001	0.165851	-0.603556	0.546139	0.786824
ENSMUSG00000005846	Rsl1d1	1503.85	-0.193742	0.121028	-1.6008	0.109422	0.340197
ENSMUSG00000005864	Cnga2	7.07993	-2.21912	1.46002	-1.51992	0.128531	NA
ENSMUSG00000005871	Apc	25698.6	0.529464	0.285257	1.85609	0.0634405	0.245826
ENSMUSG00000005873	Reep5	11388.6	-1.02688	0.0861931	-11.9137	1.00421e-32	5.29856e-29
ENSMUSG00000005881	Ergic3	2944.01	-0.107458	0.116785	-0.920129	0.357505	0.644968
ENSMUSG00000005882	Uqcc1	1023.49	0.0181541	0.171272	0.105996	0.915585	0.971628
ENSMUSG00000005886	Ncoa2	3328.57	0.746839	0.15567	4.79757	1.60604e-06	7.08134e-05
ENSMUSG00000005892	Trh	9.49345	-0.236743	0.717679	-0.329872	0.741496	NA
ENSMUSG00000005893	Nr2c2	3373.28	0.524151	0.169199	3.09784	0.00194935	0.0217758
ENSMUSG00000005897	Nr2c1	176.267	0.179321	0.222106	0.807369	0.419454	0.698972
ENSMUSG00000005899	Smpd4	1017.38	0.180537	0.153536	1.17586	0.23965	0.530264
ENSMUSG00000005907	Pex1	438.154	-0.0765535	0.206245	-0.371178	0.710505	0.879487
ENSMUSG00000005917	Otx1	125.299	-0.0412316	0.273414	-0.150803	0.880131	0.958586
ENSMUSG00000005936	Kctd20	2892.65	0.264729	0.112939	2.344	0.0190782	0.111312
ENSMUSG00000005947	Itgae	2.06196	-1.05501	1.48586	-0.710036	0.477682	NA
ENSMUSG00000005949	Ctns	317.3	0.491079	0.223727	2.19499	0.0281642	0.144135
ENSMUSG00000005950	P2rx5	12.3117	0.123601	0.687911	0.179675	0.857407	NA
ENSMUSG00000005951	Shpk	70.4021	-0.376475	0.316405	-1.18985	0.234103	0.523541
ENSMUSG00000005952	Trpv1	46.9115	1.30107	0.434001	2.99784	0.00271899	0.0280019
ENSMUSG00000005958	Ephb3	484.593	-0.382136	0.225974	-1.69106	0.0908253	0.305174
ENSMUSG00000005968	Tuft1	91.7926	0.416916	0.400694	1.04048	0.298115	0.591338
ENSMUSG00000005973	Rcn1	3037.02	-0.318647	0.116518	-2.73474	0.00624305	0.0507868
ENSMUSG00000005980	Dnase1	94.6133	-0.13722	0.36625	-0.374662	0.707912	0.878221
ENSMUSG00000005981	Trap1	1777.54	-0.10501	0.123891	-0.847597	0.396662	0.680404
ENSMUSG00000005982	Naa60	3194.92	-0.100568	0.114909	-0.875199	0.381466	0.667487
ENSMUSG00000005983	1700037C18Rik	80.1177	-0.179446	0.285311	-0.628949	0.529383	0.775386
ENSMUSG00000005986	Ankrd13d	1467.88	-0.141082	0.156802	-0.899743	0.368257	0.655033
ENSMUSG00000005994	Tyrp1	2.59854	0.280453	1.37958	0.203289	0.838909	NA
ENSMUSG00000006005	Tpr	3860.94	0.171042	0.121569	1.40695	0.159441	0.423707
ENSMUSG00000006010	Odr4	1128.73	-0.207159	0.141615	-1.46283	0.143513	0.401496
ENSMUSG00000006014	Prg4	10.3323	0.925018	0.698796	1.32373	0.185592	NA
ENSMUSG00000006019	Dhx34	359.034	0.0457277	0.169963	0.269044	0.787896	0.919531
ENSMUSG00000006021	Kptn	347.908	0.151049	0.149643	1.0094	0.312784	0.60601
ENSMUSG00000006024	Napa	2963.58	-0.115652	0.114513	-1.00995	0.31252	0.605721
ENSMUSG00000006050	Sra1	1221.26	-0.16237	0.127769	-1.27081	0.203796	0.484924
ENSMUSG00000006057	Atp5g1	1899.86	-0.48065	0.110804	-4.33783	1.43898e-05	0.000451937
ENSMUSG00000006058	Snf8	961.749	-0.138531	0.138629	-0.999292	0.317653	0.611048
ENSMUSG00000006095	Tbcb	2260.73	-0.0538982	0.135419	-0.398011	0.690622	0.870025
ENSMUSG00000006127	Inpp5k	737.754	-0.0433174	0.125228	-0.345907	0.729413	0.888691
ENSMUSG00000006134	Crkl	1142.31	0.363121	0.16865	2.15311	0.03131	0.154925
ENSMUSG00000006154	Eps8l1	109.71	0.604579	0.305492	1.97903	0.0478122	0.204656
ENSMUSG00000006169	Clint1	1365.02	0.210048	0.11719	1.79237	0.0730738	0.267124
ENSMUSG00000006179	Prss16	3.49251	-1.14802	1.19382	-0.961635	0.336233	NA
ENSMUSG00000006191	Cdkal1	200.693	-0.23464	0.224177	-1.04667	0.295251	0.588948
ENSMUSG00000006204	Cdcp3	1.85163	2.11578	1.87041	1.13119	0.257975	NA
ENSMUSG00000006205	Htra1	1335.97	0.145227	0.15611	0.930288	0.352222	0.640602
ENSMUSG00000006215	Zbtb17	519.44	0.173271	0.138672	1.2495	0.211483	0.49419
ENSMUSG00000006218	Fam131c	447.112	-0.119224	0.137252	-0.868652	0.385037	0.670746
ENSMUSG00000006219	Fblim1	283.354	1.18321	0.187694	6.30392	2.90206e-10	4.10511e-08
ENSMUSG00000006221	Hspb7	0.933666	1.89754	2.318	0.818612	0.413008	NA
ENSMUSG00000006235	Epor	5.37824	0.27601	0.89094	0.309796	0.756716	NA
ENSMUSG00000006241	Ccdc159	148.37	0.304309	0.202406	1.50346	0.13272	0.383783
ENSMUSG00000006262	Mob1b	754.422	-0.671182	0.21207	-3.16491	0.0015513	0.0182602
ENSMUSG00000006269	Atp6v1b1	2.33942	0.280302	1.46246	0.191665	0.848005	NA
ENSMUSG00000006270	Vax1	10.8197	1.50103	0.860459	1.74445	0.0810799	NA
ENSMUSG00000006273	Atp6v1b2	11918	0.139817	0.0922173	1.51617	0.129477	0.378098
ENSMUSG00000006276	Eps15l1	1094.73	0.200884	0.103914	1.93317	0.0532148	0.218513
ENSMUSG00000006281	Tep1	19.8406	-0.819572	0.860042	-0.952945	0.340618	0.630749
ENSMUSG00000006288	Ttc5	969.381	-0.262894	0.167416	-1.57031	0.116344	0.353883
ENSMUSG00000006289	Osgep	527.482	-0.322758	0.15104	-2.1369	0.0326062	0.159003
ENSMUSG00000006299	Aamp	3161.36	-0.0570322	0.136643	-0.417382	0.676399	0.863377
ENSMUSG00000006301	Tmbim1	144.937	-0.363356	0.261667	-1.38862	0.164948	0.431707
ENSMUSG00000006304	Arpc2	6145.33	-0.0177315	0.10443	-0.169792	0.865173	0.95298
ENSMUSG00000006307	Kmt2b	1768.04	0.15301	0.155621	0.98322	0.325499	0.617705
ENSMUSG00000006310	Zbtb32	9.37572	-0.385076	0.701139	-0.549215	0.582858	NA
ENSMUSG00000006313	Upk1a	5.43037	1.31831	0.982839	1.34133	0.179813	NA
ENSMUSG00000006315	Tmem147	1365.04	-0.270472	0.139973	-1.93231	0.0533214	0.218716
ENSMUSG00000006333	Rps9	3613.86	-0.0507725	0.124383	-0.408194	0.683131	0.866275
ENSMUSG00000006335	Tfpt	278.696	-0.0366914	0.170959	-0.214621	0.830063	0.93931
ENSMUSG00000006342	Susd2	21.6951	-0.258974	0.477832	-0.541977	0.587835	0.813965
ENSMUSG00000006344	Ggt5	2.99842	1.08276	1.26912	0.853156	0.393573	NA
ENSMUSG00000006345	Ggt1	18.7463	0.12017	0.595228	0.201889	0.840004	0.942919
ENSMUSG00000006356	Crip2	3882.23	0.137887	0.12414	1.11074	0.266682	0.560751
ENSMUSG00000006360	Crip1	3.28596	-0.41436	1.17454	-0.352784	0.72425	NA
ENSMUSG00000006362	Cbfa2t3	612.619	0.299728	0.258644	1.15884	0.246521	0.53777
ENSMUSG00000006369	Fbln1	499.052	0.308155	0.139262	2.21277	0.0269132	0.140045
ENSMUSG00000006373	Pgrmc1	16198	-0.0822942	0.0844331	-0.974668	0.329725	0.620712
ENSMUSG00000006378	Gcat	477.541	-0.351893	0.163576	-2.15125	0.0314563	0.155504
ENSMUSG00000006386	Tek	3.7099	-0.189899	1.06592	-0.178154	0.858602	NA
ENSMUSG00000006390	Elovl1	146.472	0.0200014	0.231228	0.0865006	0.931068	0.976992
ENSMUSG00000006392	Med8	545.221	-0.205096	0.137579	-1.49075	0.136027	0.389028
ENSMUSG00000006395	Hyi	83.6428	-0.231692	0.251546	-0.921073	0.357012	0.644419
ENSMUSG00000006398	Cdc20	69.5652	1.85869	0.438265	4.24103	2.22501e-05	0.000652216
ENSMUSG00000006403	Adamts4	54.0372	-0.284138	0.303127	-0.937359	0.348574	0.637649
ENSMUSG00000006411	Nectin4	12.7624	-0.962757	0.636664	-1.51219	0.130486	NA
ENSMUSG00000006412	Pfdn2	1231.43	-0.114421	0.195297	-0.585881	0.557956	0.794784
ENSMUSG00000006418	Rnf114	1296.4	-0.0427878	0.137147	-0.311984	0.755052	0.903654
ENSMUSG00000006423	Steep1	900.146	-0.625878	0.138987	-4.50316	6.6952e-06	0.00024219
ENSMUSG00000006435	Neurl1a	2506.88	0.356599	0.117153	3.04388	0.00233549	0.0250295
ENSMUSG00000006442	Srm	1673.9	-0.270511	0.120264	-2.2493	0.0244934	0.131794
ENSMUSG00000006445	Epha2	26.5903	0.0947825	0.547139	0.173233	0.862468	0.951476
ENSMUSG00000006456	Rbm14	947.833	0.313173	0.166916	1.87623	0.0606239	0.238317
ENSMUSG00000006457	Actn3	59.2823	-0.375674	0.324347	-1.15825	0.246763	0.538093
ENSMUSG00000006462	A530013C23Rik	1.74806	0.268748	1.54356	0.17411	0.861779	NA
ENSMUSG00000006463	Zdhhc24	596.771	0.033191	0.126798	0.261764	0.793504	0.921794
ENSMUSG00000006464	Bbs1	1308.49	0.0816116	0.116678	0.699459	0.484265	0.747594
ENSMUSG00000006469	Slc34a3	0.683993	1.44916	2.84413	0.509528	0.610382	NA
ENSMUSG00000006471	Ndor1	392.345	-0.00669422	0.216362	-0.03094	0.975317	0.991159
ENSMUSG00000006476	Nsmf	10548	0.658092	0.115433	5.70106	1.19063e-08	1.11518e-06
ENSMUSG00000006494	Pdk1	3106.58	0.204417	0.127311	1.60565	0.108351	0.338148
ENSMUSG00000006498	Ptbp1	703.909	0.425014	0.177271	2.39754	0.0165055	0.100487
ENSMUSG00000006517	Mvd	5115.94	-0.230872	0.122768	-1.88055	0.0600336	0.237348
ENSMUSG00000006519	Cyba	13.2172	-0.937721	0.625831	-1.49836	0.13404	NA
ENSMUSG00000006522	Itih3	19.4915	0.222059	0.537137	0.413412	0.679305	0.865156
ENSMUSG00000006526	Stimate	545.082	0.25531	0.142351	1.79352	0.0728897	0.266879
ENSMUSG00000006527	Sfmbt1	636.426	-0.233292	0.174219	-1.33907	0.180546	0.456019
ENSMUSG00000006538	Ihh	4.44857	-0.203708	1.02901	-0.197965	0.843072	NA
ENSMUSG00000006542	Prkag3	1.00846	-0.126318	2.28753	-0.0552201	0.955963	NA
ENSMUSG00000006546	Cryba2	0.624934	-1.06846	3.06421	-0.348692	0.727321	NA
ENSMUSG00000006567	Atp7b	94.3327	0.76673	0.251343	3.05053	0.0022844	0.0246152
ENSMUSG00000006575	Rundc3a	4131.69	-0.253001	0.110901	-2.28132	0.0225295	0.124344
ENSMUSG00000006576	Slc4a3	3402.08	-0.037647	0.148994	-0.252675	0.800519	0.925529
ENSMUSG00000006585	Cdt1	94.2021	0.782713	0.254905	3.0706	0.00213627	0.0233691
ENSMUSG00000006586	Runx1t1	1749.64	0.409358	0.211304	1.93729	0.0527095	0.217332
ENSMUSG00000006587	Snai3	0.807892	-0.0982055	2.77729	-0.0353602	0.971793	NA
ENSMUSG00000006589	Aprt	1091.17	-0.225522	0.128716	-1.75208	0.0797593	0.281747
ENSMUSG00000006599	Gtf2h1	969.99	-0.155069	0.123097	-1.25974	0.207765	0.489302
ENSMUSG00000006611	Hfe	25.4629	-1.53886	0.450929	-3.41264	0.000643367	0.00918292
ENSMUSG00000006638	Abhd1	53.2822	-0.52778	0.473682	-1.11421	0.26519	0.559096
ENSMUSG00000006641	Slc5a6	590.994	0.182786	0.148819	1.22824	0.219357	0.505416
ENSMUSG00000006642	Tcf23	0.763709	-3.14706	2.73374	-1.15119	0.249653	NA
ENSMUSG00000006649	Nphs1	1.99528	1.43867	1.89065	0.76094	0.446693	NA
ENSMUSG00000006651	Aplp1	24401.5	0.197505	0.132472	1.49092	0.135984	0.389028
ENSMUSG00000006673	Qrich1	1866.68	-0.21475	0.126185	-1.70187	0.0887793	0.301079
ENSMUSG00000006675	P4htm	903.684	0.152319	0.302218	0.504003	0.614259	0.829688
ENSMUSG00000006676	Usp19	2428.39	-0.0556898	0.135093	-0.412233	0.680168	0.865326
ENSMUSG00000006678	Pola1	152.372	0.0815782	0.242407	0.336534	0.736468	0.892689
ENSMUSG00000006699	Cdc42	10807.2	0.0533004	0.103524	0.51486	0.606651	0.825073
ENSMUSG00000006705	Pknox1	490.753	0.405119	0.144631	2.80105	0.00509371	0.0438436
ENSMUSG00000006711	D130043K22Rik	1057.66	-0.120688	0.175703	-0.686885	0.492155	0.753051
ENSMUSG00000006715	Gmnn	47.5537	0.568844	0.427214	1.33152	0.183018	0.459401
ENSMUSG00000006717	Acot13	450.093	-0.255952	0.198072	-1.29222	0.196282	0.475473
ENSMUSG00000006720	Zfp184	127.948	-0.0143928	0.248637	-0.0578868	0.953839	0.983531
ENSMUSG00000006724	Cyp27b1	10.5274	-0.0860438	0.689309	-0.124826	0.900661	NA
ENSMUSG00000006728	Cdk4	1560.16	-0.127078	0.125321	-1.01402	0.310574	0.604336
ENSMUSG00000006731	B4galnt1	2923.41	-0.27226	0.10764	-2.52935	0.0114274	0.0776126
ENSMUSG00000006732	Mettl1	352.85	-0.251735	0.207649	-1.21231	0.225395	0.512961
ENSMUSG00000006736	Tspan31	1389.62	0.0908562	0.103744	0.875776	0.381152	0.667487
ENSMUSG00000006740	Kif5b	3671.31	-0.739082	0.181786	-4.06568	4.78923e-05	0.00119125
ENSMUSG00000006763	Saal1	301.11	-0.0504289	0.152879	-0.329861	0.741505	0.895839
ENSMUSG00000006764	Tph2	9.02057	-0.266777	0.707585	-0.377024	0.706156	NA
ENSMUSG00000006777	Krt23	2.74042	-0.492468	1.6054	-0.306756	0.759029	NA
ENSMUSG00000006782	Cnp	464.989	0.382901	0.25394	1.50784	0.131596	0.381836
ENSMUSG00000006784	Odad4	23.3857	-0.26288	0.56965	-0.461475	0.644458	0.846216
ENSMUSG00000006800	Sulf2	3304.86	0.112498	0.115564	0.973474	0.330318	0.621344
ENSMUSG00000006818	Sod2	4680.68	-0.0376005	0.0953694	-0.394262	0.693388	0.871321
ENSMUSG00000006850	Tmco6	288.049	-0.0103064	0.155668	-0.0662077	0.947212	0.980928
ENSMUSG00000006906	Stambp	1311.08	-0.0979365	0.112197	-0.872894	0.382721	0.668885
ENSMUSG00000006920	Ezh1	1201.88	0.410031	0.130267	3.14762	0.00164604	0.0190386
ENSMUSG00000006930	Hap1	2969.19	-0.733238	0.128778	-5.69382	1.2423e-08	1.14609e-06
ENSMUSG00000006931	P3h4	261.611	-0.360068	0.293156	-1.22825	0.219354	0.505416
ENSMUSG00000006932	Ctnnb1	17597.1	0.319912	0.0801464	3.9916	6.56299e-05	0.00152264
ENSMUSG00000006941	Eif1b	1980.94	-0.221577	0.125493	-1.76566	0.0774533	0.276855
ENSMUSG00000006958	Chrd	97.6677	-0.268087	0.281453	-0.952513	0.340837	0.630809
ENSMUSG00000006998	Psmd2	7720.73	0.00104047	0.138368	0.00751955	0.994	0.997809
ENSMUSG00000007021	Syngr3	7875.05	0.353637	0.113956	3.10327	0.00191394	0.0214559
ENSMUSG00000007029	Vars	2135.26	-0.69036	0.152802	-4.51801	6.24224e-06	0.000229254
ENSMUSG00000007030	Vwa7	12.5659	-0.608435	0.669043	-0.909411	0.363133	NA
ENSMUSG00000007033	Hspa1l	62.6116	0.150338	0.361573	0.415788	0.677565	0.863998
ENSMUSG00000007035	Msh5	12.5086	1.31548	0.768255	1.7123	0.0868423	NA
ENSMUSG00000007036	Abhd16a	1230.44	0.0249196	0.127181	0.195938	0.844659	0.94413
ENSMUSG00000007038	Neu1	693.329	0.0122366	0.150346	0.0813892	0.935132	0.978335
ENSMUSG00000007039	Ddah2	1471.88	0.0210371	0.155731	0.135086	0.892544	0.965098
ENSMUSG00000007041	Clic1	213.608	-0.801353	0.168523	-4.75516	1.98292e-06	8.48315e-05
ENSMUSG00000007050	Lsm2	191.391	0.0126079	0.234307	0.0538094	0.957087	0.985082
ENSMUSG00000007080	Pole	87.5568	0.959582	0.326425	2.93967	0.00328559	0.0321035
ENSMUSG00000007097	Atp1a2	10265	-0.164698	0.132127	-1.24651	0.212576	0.496066
ENSMUSG00000007107	Atp1a4	0.762979	0.0509295	2.4643	0.0206669	0.983511	NA
ENSMUSG00000007122	Casq1	9.14861	0.241481	0.761326	0.317184	0.751104	NA
ENSMUSG00000007207	Stx1a	7194.26	0.228771	0.126861	1.80331	0.0713394	0.263461
ENSMUSG00000007209	Ceacam9	1.16281	-0.101265	2.23337	-0.0453417	0.963835	NA
ENSMUSG00000007216	Zfp775	318.231	-0.10359	0.17007	-0.609106	0.542454	0.784717
ENSMUSG00000007279	Scube2	24.2047	0.626083	0.462808	1.35279	0.176122	0.449434
ENSMUSG00000007338	Mrpl49	673.671	-0.0981146	0.127418	-0.770024	0.441286	0.715796
ENSMUSG00000007379	Dennd2c	17.2202	-0.298756	0.623597	-0.479085	0.631878	0.840657
ENSMUSG00000007411	Mark3	2640.54	-0.526296	0.173399	-3.03518	0.00240395	0.0255899
ENSMUSG00000007415	Gatad1	1645.17	-0.136695	0.107166	-1.27555	0.202116	0.48335
ENSMUSG00000007440	Pcdha10	315.799	-0.3029	0.154132	-1.9652	0.0493915	0.208738
ENSMUSG00000007458	M6pr	1152.44	-0.0833132	0.107987	-0.771514	0.440402	0.715138
ENSMUSG00000007476	Lrrc8a	1637.62	-0.118092	0.156673	-0.75375	0.450999	0.722777
ENSMUSG00000007480	Mc5r	9.01815	-1.35732	0.775278	-1.75075	0.0799895	NA
ENSMUSG00000007564	Ppp2r1a	21175.4	0.0380784	0.110563	0.344406	0.730541	0.888902
ENSMUSG00000007570	Fance	559.71	0.0792596	0.232661	0.340665	0.733356	0.890958
ENSMUSG00000007589	Tinf2	228.956	0.306367	0.216908	1.41243	0.157825	0.421883
ENSMUSG00000007591	Tssk4	3.84272	0.873452	1.10258	0.792191	0.428249	NA
ENSMUSG00000007594	Hapln4	59.596	1.70646	1.20668	1.41418	0.157309	0.421042
ENSMUSG00000007603	Dus3l	1016.46	-0.206551	0.141053	-1.46436	0.143097	0.400828
ENSMUSG00000007610	Gtpbp3	326.858	-0.0656444	0.174102	-0.377045	0.70614	0.877717
ENSMUSG00000007613	Tgfbr1	396.148	-0.0352061	0.177376	-0.198483	0.842667	0.943483
ENSMUSG00000007617	Homer1	2183.32	0.0847268	0.169302	0.500447	0.61676	0.831151
ENSMUSG00000007646	Rad51c	94.7334	-0.0695534	0.273479	-0.254329	0.799242	0.924643
ENSMUSG00000007653	Gabrb2	2439.8	0.43361	0.246392	1.75984	0.0784358	0.278779
ENSMUSG00000007655	Cav1	430.587	-0.561028	0.270242	-2.07602	0.0378922	0.175927
ENSMUSG00000007656	Arpp19	4231.21	0.358073	0.0982735	3.64364	0.000268807	0.00460493
ENSMUSG00000007659	Bcl2l1	2571.63	0.321535	0.0894308	3.59534	0.000323964	0.00537529
ENSMUSG00000007670	Khsrp	2875.78	-0.146673	0.154485	-0.949429	0.342403	0.631763
ENSMUSG00000007682	Dio2	1463.85	-1.00096	0.159126	-6.29035	3.16758e-10	4.43714e-08
ENSMUSG00000007721	Ccdc124	1196.52	0.00111166	0.154779	0.00718227	0.994269	0.997887
ENSMUSG00000007739	Cct4	3630.8	-0.192988	0.0964849	-2.00019	0.0454802	0.19854
ENSMUSG00000007777	0610009B22Rik	238.48	0.234758	0.185767	1.26372	0.206329	0.487315
ENSMUSG00000007783	Cpt1c	1668.29	-0.139396	0.133873	-1.04126	0.297756	0.590953
ENSMUSG00000007805	Twist2	23.6644	-0.0542253	0.483104	-0.112244	0.91063	0.970547
ENSMUSG00000007812	Zfp655	676.997	0.040975	0.128922	0.317828	0.750615	0.900933
[truncated: 24,820 more rows]

## Sheet: Lucif_v_Chd8-sh5
	GeneSymbol	baseMean	log2FoldChange	lfcSE	stat	pvalue	padj
[truncated: 25,960 more rows]

[truncated: 3 more sheets: Lucif_v_Crebbp-sh5, Lucif_v_Ash1L-sh5, voom_Lucif_v_allALCMs]
