# Supplementary material for: Identification of a transcriptional signature found in multiple models of ASD and related disorders
Source: HighWire-hosted journal article supplement (doi:10.1101/gr.276591.122), 2022-09-01
Supplement: Supplemental_Table_S2.xlsx [file Supplemental_Table_S2.xlsx]

## Sheet: Legend
Supplemental_Table_S2
Sheets 1-2:	Narrow Up- and down-regulated transcriptional gene signatures; associated identifiers and genomic information provided
Sheets 3-4:	Broad Up- and down-regulated transcriptional gene signatures; associated identifiers and genomic information provided
Sheet 5:	Summary of genes removed from signature lists due to their being differentially expressed in Luciferase versus uninfected contrasts

## Sheet: Narrow Signature Genes - Up
Input	Input Type	MGI Gene/Marker ID	Symbol	Name	Feature Type	Chr	Strand	Start	End	Entrez Gene ID
ENSMUSG00000033788	Ensembl Gene Model	MGI:1349385	Dysf	dysferlin	protein coding gene	6	+	83985572	84188042	26903
ENSMUSG00000037239	Ensembl Gene Model	MGI:2142186	Spred3	sprouty-related EVH1 domain containing 3	protein coding gene	7	-	28858254	28869836	101809
ENSMUSG00000028211	Ensembl Gene Model	MGI:1926609	Trp53inp1	transformation related protein 53 inducible nuclear protein 1	protein coding gene	4	+	11156441	11174379	60599
ENSMUSG00000030779	Ensembl Gene Model	MGI:894835	Rbbp6	retinoblastoma binding protein 6, ubiquitin ligase	protein coding gene	7	+	122568980	122601795	19647
ENSMUSG00000024256	Ensembl Gene Model	MGI:105094	Adcyap1	adenylate cyclase activating polypeptide 1	protein coding gene	17	+	93506445	93513965	11516
ENSMUSG00000023940	Ensembl Gene Model	MGI:1919665	Sgo1	shugoshin 1	protein coding gene	17	-	53981814	53996361	72415
ENSMUSG00000028780	Ensembl Gene Model	MGI:107557	Sema3c	sema domain, immunoglobulin domain (Ig), short basic domain, secreted, (semaphorin) 3C	protein coding gene	5	+	17779814	17935266	20348
ENSMUSG00000036552	Ensembl Gene Model	MGI:1917317	Ermard	ER membrane associated RNA degradation	protein coding gene	17	+	15261813	15310307	381062
ENSMUSG00000048327	Ensembl Gene Model	MGI:1917716	Ckap2l	cytoskeleton associated protein 2-like	protein coding gene	2	-	129110130	129139132	70466
ENSMUSG00000027326	Ensembl Gene Model	MGI:1923714	Knl1	kinetochore scaffold 1	protein coding gene	2	+	118877600	118935982	76464
ENSMUSG00000026683	Ensembl Gene Model	MGI:1914227	Nuf2	NUF2, NDC80 kinetochore complex component	protein coding gene	1	-	169325503	169359033	66977
ENSMUSG00000001552	Ensembl Gene Model	MGI:96650	Jup	junction plakoglobin	protein coding gene	11	-	100259784	100288589	16480
ENSMUSG00000040459	Ensembl Gene Model	MGI:2442985	Arglu1	arginine and glutamate rich 1	protein coding gene	8	-	8715075	8740521	234023
ENSMUSG00000046201	Ensembl Gene Model	MGI:1925212	Scaf8	SR-related CTD-associated factor 8	protein coding gene	17	+	3165247	3249134	106583
ENSMUSG00000030790	Ensembl Gene Model	MGI:108058	Adm	adrenomedullin	protein coding gene	7	+	110226868	110229027	11535
ENSMUSG00000022360	Ensembl Gene Model	MGI:1917722	Atad2	ATPase family, AAA domain containing 2	protein coding gene	15	-	57957440	57998478	70472
ENSMUSG00000022094	Ensembl Gene Model	MGI:2384851	Slc39a14	solute carrier family 39 (zinc transporter), member 14	protein coding gene	14	-	70540918	70588874	213053
ENSMUSG00000022629	Ensembl Gene Model	MGI:109188	Kif21a	kinesin family member 21A	protein coding gene	15	-	90817479	90934151	16564
ENSMUSG00000026950	Ensembl Gene Model	MGI:97292	Neb	nebulin	protein coding gene	2	-	52026652	52228810	17996
ENSMUSG00000022403	Ensembl Gene Model	MGI:1917606	St13	suppression of tumorigenicity 13	protein coding gene	15	-	81247869	81283951	70356
ENSMUSG00000037533	Ensembl Gene Model	MGI:2384761	Rapgef6	Rap guanine nucleotide exchange factor (GEF) 6	protein coding gene	11	+	54413673	54590111	192786
ENSMUSG00000006398	Ensembl Gene Model	MGI:1859866	Cdc20	cell division cycle 20	protein coding gene	4	-	118290098	118294540	107995
ENSMUSG00000036158	Ensembl Gene Model	MGI:1916034	Prickle1	prickle planar cell polarity protein 1	protein coding gene	15	-	93396995	93493772	106042
ENSMUSG00000000915	Ensembl Gene Model	MGI:1352504	Hip1r	huntingtin interacting protein 1 related	protein coding gene	5	+	124111665	124141278	29816
ENSMUSG00000040701	Ensembl Gene Model	MGI:1328307	Ap1g2	adaptor protein complex AP-1, gamma 2 subunit	protein coding gene	14	-	55336292	55344050	11766
ENSMUSG00000031004	Ensembl Gene Model	MGI:106035	Mki67	antigen identified by monoclonal antibody Ki 67	protein coding gene	7	-	135291513	135318090	17345
ENSMUSG00000023074	Ensembl Gene Model	MGI:1917630	Mospd1	motile sperm domain containing 1	protein coding gene	X	-	52433475	52459379	70380
ENSMUSG00000040167	Ensembl Gene Model	MGI:1914393	Ikzf5	IKAROS family zinc finger 5	protein coding gene	7	-	130990381	131012250	67143
ENSMUSG00000027318	Ensembl Gene Model	MGI:1341813	Adam33	a disintegrin and metallopeptidase domain 33	protein coding gene	2	-	130892739	130905734	110751
ENSMUSG00000026174	Ensembl Gene Model	MGI:1928902	Cnot9	CCR4-NOT transcription complex, subunit 9	protein coding gene	1	+	74545217	74570001	58184
ENSMUSG00000030126	Ensembl Gene Model	MGI:2442368	Tmcc1	transmembrane and coiled coil domains 1	protein coding gene	6	-	115995572	116170447	330401
ENSMUSG00000097767	Ensembl Gene Model	MGI:2444886	Miat	myocardial infarction associated transcript (non-protein coding)	lncRNA gene	5	-	112361094	112376814	330166
ENSMUSG00000014498	Ensembl Gene Model	MGI:2444029	Ankrd52	ankyrin repeat domain 52	protein coding gene	10	+	128212993	128229875	237615
ENSMUSG00000025323	Ensembl Gene Model	MGI:107595	Sp4	trans-acting transcription factor 4	protein coding gene	12	-	118198668	118265175	20688
ENSMUSG00000049739	Ensembl Gene Model	MGI:3665412	Zfp646	zinc finger protein 646	protein coding gene	7	+	127476074	127485168	233905
ENSMUSG00000021983	Ensembl Gene Model	MGI:1354710	Atp8a2	ATPase, aminophospholipid transporter-like, class I, type 8A, member 2	protein coding gene	14	-	59875989	60434628	50769
ENSMUSG00000005410	Ensembl Gene Model	MGI:103197	Mcm5	minichromosome maintenance complex component 5	protein coding gene	8	+	75836197	75855067	17218
ENSMUSG00000036501	Ensembl Gene Model	MGI:2447834	Fam13b	family with sequence similarity 13, member B	protein coding gene	18	-	34575404	34639884	225358
ENSMUSG00000081058	Ensembl Gene Model	MGI:2448357	H3c15	H3 clustered histone 15	protein coding gene	3	-	96145795	96146443	97114
ENSMUSG00000067430	Ensembl Gene Model	MGI:1920701	Zfp763	zinc finger protein 763	protein coding gene	17	-	33235838	33252355	73451
ENSMUSG00000092416	Ensembl Gene Model	MGI:3584269	Zfp141	zinc finger protein 141	protein coding gene	7	-	42122810	42155164	434178
ENSMUSG00000025810	Ensembl Gene Model	MGI:106206	Nrp1	neuropilin 1	protein coding gene	8	+	129085085	129229844	18186
ENSMUSG00000017716	Ensembl Gene Model	MGI:1203517	Birc5	baculoviral IAP repeat-containing 5	protein coding gene	11	+	117740077	117746569	11799
ENSMUSG00000001403	Ensembl Gene Model	MGI:1915862	Ube2c	ubiquitin-conjugating enzyme E2C	protein coding gene	2	+	164611849	164614822	68612
ENSMUSG00000020189	Ensembl Gene Model	MGI:2443807	Osbpl8	oxysterol binding protein-like 8	protein coding gene	10	+	111000663	111133110	237542
ENSMUSG00000020258	Ensembl Gene Model	MGI:2444085	Glyctk	glycerate kinase	protein coding gene	9	-	106030056	106035337	235582
ENSMUSG00000004891	Ensembl Gene Model	MGI:101784	Nes	nestin	protein coding gene	3	+	87878400	87887758	18008
ENSMUSG00000020776	Ensembl Gene Model	MGI:1922033	Fbf1	Fas (TNFRSF6) binding factor 1	protein coding gene	11	-	116033111	116058992	217335
ENSMUSG00000003746	Ensembl Gene Model	MGI:104677	Man1a	mannosidase 1, alpha	protein coding gene	10	-	53780881	53952705	17155
ENSMUSG00000024566	Ensembl Gene Model	MGI:1354757	Atp9b	ATPase, class II, type 9B	protein coding gene	18	-	80777356	80977275	50771
ENSMUSG00000043441	Ensembl Gene Model	MGI:2443628	Gpr149	G protein-coupled receptor 149	protein coding gene	3	-	62436851	62512861	229357
ENSMUSG00000042133	Ensembl Gene Model	MGI:2445173	Ppig	peptidyl-prolyl isomerase G (cyclophilin G)	protein coding gene	2	+	69553092	69584403	228005
ENSMUSG00000042050	Ensembl Gene Model	MGI:2445085	Dync2i1	dynein 2 intermediate chain 1	protein coding gene	12	-	116169882	116226642	217935
ENSMUSG00000040204	Ensembl Gene Model	MGI:1915276	Pclaf	PCNA clamp associated factor	protein coding gene	9	+	65797519	65810548	68026
ENSMUSG00000058761	Ensembl Gene Model	MGI:1920257	Rnf169	ring finger protein 169	protein coding gene	7	-	99569461	99629655	108937
ENSMUSG00000025871	Ensembl Gene Model	MGI:1921162	4833439L19Rik	RIKEN cDNA 4833439L19 gene	protein coding gene	13	-	54699031	54713195	97820
ENSMUSG00000012443	Ensembl Gene Model	MGI:1098231	Kif11	kinesin family member 11	protein coding gene	19	+	37364851	37410307	16551
ENSMUSG00000035236	Ensembl Gene Model	MGI:2443716	Scai	suppressor of cancer cell invasion	protein coding gene	2	-	38956226	39080746	320271
ENSMUSG00000023505	Ensembl Gene Model	MGI:1315198	Cdca3	cell division cycle associated 3	protein coding gene	6	+	124806533	124810664	14793
ENSMUSG00000069895	Ensembl Gene Model	MGI:3694797	Atxn1l	ataxin 1-like	protein coding gene	8	-	110453083	110464371	52335
ENSMUSG00000020649	Ensembl Gene Model	MGI:98181	Rrm2	ribonucleotide reductase M2	protein coding gene	12	+	24758253	24764145	20135
ENSMUSG00000108228	Ensembl Gene Model	MGI:5439415	6430584L05Rik	RIKEN cDNA 6430584L05 gene	lncRNA gene	6	+	55373872	55389270	330324
ENSMUSG00000029634	Ensembl Gene Model	MGI:1921382	Rnf6	ring finger protein (C3H2C3 type) 6	protein coding gene	5	-	146146003	146158267	74132
ENSMUSG00000009907	Ensembl Gene Model	MGI:1100499	Vps4b	vacuolar protein sorting 4B	protein coding gene	1	-	106698518	106724455	20479
ENSMUSG00000001228	Ensembl Gene Model	MGI:1338889	Uhrf1	ubiquitin-like, containing PHD and RING finger domains, 1	protein coding gene	17	+	56610337	56630486	18140
ENSMUSG00000050931	Ensembl Gene Model	MGI:1921692	Sgms2	sphingomyelin synthase 2	protein coding gene	3	-	131112634	131197172	74442
ENSMUSG00000039219	Ensembl Gene Model	MGI:2137512	Arid4b	AT rich interactive domain 4B (RBP1-like)	protein coding gene	13	+	14238334	14374188	94246
ENSMUSG00000026028	Ensembl Gene Model	MGI:1918077	Trak2	trafficking protein, kinesin binding 2	protein coding gene	1	-	58939608	59012589	70827
ENSMUSG00000039456	Ensembl Gene Model	MGI:2136841	Morc3	microrchidia 3	protein coding gene	16	+	93629009	93672961	338467
ENSMUSG00000021890	Ensembl Gene Model	MGI:1921677	Eaf1	ELL associated factor 1	protein coding gene	14	+	31217036	31231815	74427
ENSMUSG00000070348	Ensembl Gene Model	MGI:88313	Ccnd1	cyclin D1	protein coding gene	7	-	144483668	144493568	12443
ENSMUSG00000036002	Ensembl Gene Model	MGI:2441854	Fam214b	family with sequence similarity 214, member B	protein coding gene	4	-	43032414	43046220	230088
ENSMUSG00000026987	Ensembl Gene Model	MGI:2442782	Baz2b	bromodomain adjacent to zinc finger domain, 2B	protein coding gene	2	-	59729707	60040183	407823
ENSMUSG00000027715	Ensembl Gene Model	MGI:108069	Ccna2	cyclin A2	protein coding gene	3	-	36619014	36626299	12428
ENSMUSG00000024056	Ensembl Gene Model	MGI:1914302	Ndc80	NDC80 kinetochore complex component	protein coding gene	17	-	71803095	71833852	67052
ENSMUSG00000035293	Ensembl Gene Model	MGI:2444298	G2e3	G2/M-phase specific E3 ubiquitin ligase	protein coding gene	12	+	51395013	51423769	217558
ENSMUSG00000037313	Ensembl Gene Model	MGI:1341163	Tacc3	transforming, acidic coiled-coil containing protein 3	protein coding gene	5	+	33814808	33829547	21335
ENSMUSG00000031137	Ensembl Gene Model	MGI:109178	Fgf13	fibroblast growth factor 13	protein coding gene	X	-	58107505	58613431	14168
ENSMUSG00000038530	Ensembl Gene Model	MGI:108409	Rgs4	regulator of G-protein signaling 4	protein coding gene	1	-	169569046	169575211	19736
ENSMUSG00000018238	Ensembl Gene Model	MGI:95692	Gdf9	growth differentiation factor 9	protein coding gene	11	+	53321850	53328731	14566
ENSMUSG00000037544	Ensembl Gene Model	MGI:2183453	Dlgap5	DLG associated protein 5	protein coding gene	14	-	47625236	47655864	218977
ENSMUSG00000022176	Ensembl Gene Model	MGI:2155260	Rem2	rad and gem related GTP binding protein 2	protein coding gene	14	+	54713557	54717888	140743
ENSMUSG00000036181	Ensembl Gene Model	MGI:1931526	H1f2	H1.2 linker histone, cluster member	protein coding gene	13	+	23922790	23923514	50708
ENSMUSG00000073147	Ensembl Gene Model	MGI:1923227	5031425E22Rik	RIKEN cDNA 5031425E22 gene	lncRNA gene	5	-	23587306	23639267	269630
ENSMUSG00000030980	Ensembl Gene Model	MGI:1913606	Knop1	lysine rich nucleolar protein 1	protein coding gene	7	-	118441440	118455221	66356
ENSMUSG00000054723	Ensembl Gene Model	MGI:2146912	Vmac	vimentin-type intermediate filament associated coiled-coil protein	protein coding gene	17	-	57020932	57024699	106639
ENSMUSG00000028582	Ensembl Gene Model	MGI:2443076	Cc2d1b	coiled-coil and C2 domain containing 1B	protein coding gene	4	+	108477137	108491320	319965
ENSMUSG00000001517	Ensembl Gene Model	MGI:1347487	Foxm1	forkhead box M1	protein coding gene	6	+	128339957	128352849	14235
ENSMUSG00000073434	Ensembl Gene Model	MGI:1921267	Wdr90	WD repeat domain 90	protein coding gene	17	-	26063745	26080475	106618
ENSMUSG00000035683	Ensembl Gene Model	MGI:106924	Melk	maternal embryonic leucine zipper kinase	protein coding gene	4	+	44300876	44364675	17279
ENSMUSG00000030059	Ensembl Gene Model	MGI:2684999	Tmf1	TATA element modulatory factor 1	protein coding gene	6	-	97129958	97156083	232286
ENSMUSG00000024330	Ensembl Gene Model	MGI:88447	Col11a2	collagen, type XI, alpha 2	protein coding gene	17	+	34258411	34285659	12815
ENSMUSG00000037887	Ensembl Gene Model	MGI:106626	Dusp8	dual specificity phosphatase 8	protein coding gene	7	-	141633227	141649580	18218
ENSMUSG00000020674	Ensembl Gene Model	MGI:1916925	Pxdn	peroxidasin	protein coding gene	12	+	29987607	30067657	69675
ENSMUSG00000033952	Ensembl Gene Model	MGI:1334448	Aspm	abnormal spindle microtubule assembly	protein coding gene	1	+	139382510	139421829	12316
ENSMUSG00000019464	Ensembl Gene Model	MGI:97793	Ptger1	prostaglandin E receptor 1 (subtype EP1)	protein coding gene	8	+	84393307	84399382	19216
ENSMUSG00000026803	Ensembl Gene Model	MGI:105044	Ttf1	transcription termination factor, RNA polymerase I	protein coding gene	2	+	28950274	28977668	22130
ENSMUSG00000040188	Ensembl Gene Model	MGI:1346518	Scamp2	secretory carrier membrane protein 2	protein coding gene	9	+	57468226	57496078	24044
ENSMUSG00000001542	Ensembl Gene Model	MGI:2183438	Ell2	elongation factor for RNA polymerase II 2	protein coding gene	13	+	75855603	75920480	192657
ENSMUSG00000037428	Ensembl Gene Model	MGI:1343180	Vgf	VGF nerve growth factor inducible	protein coding gene	5	+	137055246	137062205	381677
ENSMUSG00000045761	Ensembl Gene Model	MGI:2443498	Togaram2	TOG array regulator of axonemal microtubules 2	protein coding gene	17	+	71980256	72036664	320159
ENSMUSG00000027469	Ensembl Gene Model	MGI:1919369	Tpx2	TPX2, microtubule-associated	protein coding gene	2	+	152689884	152737241	72119
ENSMUSG00000029563	Ensembl Gene Model	MGI:2148705	Foxp2	forkhead box P2	protein coding gene	6	+	14901348	15441976	114142
ENSMUSG00000041431	Ensembl Gene Model	MGI:88302	Ccnb1	cyclin B1	protein coding gene	13	-	100915247	100922994	268697
ENSMUSG00000020914	Ensembl Gene Model	MGI:98790	Top2a	topoisomerase (DNA) II alpha	protein coding gene	11	-	98883769	98915015	21973
ENSMUSG00000020493	Ensembl Gene Model	MGI:2444496	Prr11	proline rich 11	protein coding gene	11	-	86979979	86999534	270906
ENSMUSG00000024883	Ensembl Gene Model	MGI:2385695	Rin1	Ras and Rab interactor 1	protein coding gene	19	+	5100509	5107099	225870
ENSMUSG00000026834	Ensembl Gene Model	MGI:2661081	Acvr1c	activin A receptor, type IC	protein coding gene	2	-	58157465	58247907	269275
ENSMUSG00000027820	Ensembl Gene Model	MGI:97004	Mme	membrane metallo endopeptidase	protein coding gene	3	+	63202632	63291134	17380
ENSMUSG00000027331	Ensembl Gene Model	MGI:1289298	Knstrn	kinetochore-localized astrin/SPAG5 binding	protein coding gene	2	+	118644470	118667691	51944
ENSMUSG00000038503	Ensembl Gene Model	MGI:1891421	Mesd	mesoderm development LRP chaperone	protein coding gene	7	+	83533074	83549519	67943
ENSMUSG00000021585	Ensembl Gene Model	MGI:1098236	Cast	calpastatin	protein coding gene	13	-	74840487	74956929	12380
ENSMUSG00000032855	Ensembl Gene Model	MGI:97603	Pkd1	polycystin 1, transient receptor potential channel interacting	protein coding gene	17	+	24768808	24815482	18763
ENSMUSG00000027306	Ensembl Gene Model	MGI:2675669	Nusap1	nucleolar and spindle associated protein 1	protein coding gene	2	+	119448779	119480646	108907
ENSMUSG00000048142	Ensembl Gene Model	MGI:2447776	Nat8l	N-acetyltransferase 8-like	protein coding gene	5	+	34153328	34163260	269642
ENSMUSG00000018974	Ensembl Gene Model	MGI:1858230	Sart3	squamous cell carcinoma antigen recognized by T cells 3	protein coding gene	5	-	113880505	113910461	53890
ENSMUSG00000013089	Ensembl Gene Model	MGI:1096867	Etv5	ets variant 5	protein coding gene	16	-	22200063	22258320	104156
ENSMUSG00000074748	Ensembl Gene Model	MGI:1914971	Atxn7l3b	ataxin 7-like 3B	protein coding gene	10	-	112761335	112764906	382423
ENSMUSG00000040084	Ensembl Gene Model	MGI:1333889	Bub1b	BUB1B, mitotic checkpoint serine/threonine kinase	protein coding gene	2	+	118428692	118472072	12236
ENSMUSG00000034906	Ensembl Gene Model	MGI:2444777	Ncaph	non-SMC condensin I complex, subunit H	protein coding gene	2	-	126945729	126975874	215387
ENSMUSG00000040809	Ensembl Gene Model	MGI:1330860	Chil3	chitinase-like 3	protein coding gene	3	-	106054870	106074880	12655
ENSMUSG00000038485	Ensembl Gene Model	MGI:2651588	Socs7	suppressor of cytokine signaling 7	protein coding gene	11	+	97253261	97289368	192157
ENSMUSG00000037259	Ensembl Gene Model	MGI:2139080	Dzank1	double zinc ribbon and ankyrin repeat domains 1	protein coding gene	2	-	144312477	144369334	241688
ENSMUSG00000035776	Ensembl Gene Model	MGI:2177151	Cd99l2	CD99 antigen-like 2	protein coding gene	X	-	70463666	70536455	171486
ENSMUSG00000032503	Ensembl Gene Model	MGI:107562	Arpp21	cyclic AMP-regulated phosphoprotein, 21	protein coding gene	9	-	111894159	112065006	74100
ENSMUSG00000030265	Ensembl Gene Model	MGI:96680	Kras	Kirsten rat sarcoma viral oncogene homolog	protein coding gene	6	-	145162425	145195965	16653
ENSMUSG00000039976	Ensembl Gene Model	MGI:2652878	Tbc1d16	TBC1 domain family, member 16	protein coding gene	11	-	119033871	119119325	207592
ENSMUSG00000025665	Ensembl Gene Model	MGI:1914321	Rps6ka6	ribosomal protein S6 kinase polypeptide 6	protein coding gene	X	-	110297889	110447656	67071
ENSMUSG00000020863	Ensembl Gene Model	MGI:1914934	Luc7l3	LUC7-like 3 (S. cerevisiae)	protein coding gene	11	-	94181899	94213196	67684

## Sheet: Narrow Signature Genes - Down
Input	Input Type	MGI Gene/Marker ID	Symbol	Name	Feature Type	Chr	Strand	Start	End	Entrez Gene ID
ENSMUSG00000027227	Ensembl Gene Model	MGI:98266	Sord	sorbitol dehydrogenase	protein coding gene	2	+	122065320	122095818	20322
ENSMUSG00000029602	Ensembl Gene Model	MGI:1330842	Rasal1	RAS protein activator like 1 (GAP1 like)	protein coding gene	5	+	120786877	120817662	19415
ENSMUSG00000030310	Ensembl Gene Model	MGI:95627	Slc6a1	solute carrier family 6 (neurotransmitter transporter, GABA), member 1	protein coding gene	6	+	114259596	114294491	232333
ENSMUSG00000030876	Ensembl Gene Model	MGI:1914862	Mettl9	methyltransferase like 9	protein coding gene	7	+	120633668	120677552	59052
ENSMUSG00000026841	Ensembl Gene Model	MGI:2138953	Fibcd1	fibrinogen C domain containing 1	protein coding gene	2	-	31703302	31736017	98970
ENSMUSG00000066721	Ensembl Gene Model	MGI:2141921	Zfp575	zinc finger protein 575	protein coding gene	7	-	24283263	24287066	101544
ENSMUSG00000020044	Ensembl Gene Model	MGI:98754	Timp3	tissue inhibitor of metalloproteinase 3	protein coding gene	10	+	86136276	86185369	21859
ENSMUSG00000037771	Ensembl Gene Model	MGI:1194488	Slc32a1	solute carrier family 32 (GABA vesicular transporter), member 1	protein coding gene	2	+	158452687	158457668	22348
ENSMUSG00000027230	Ensembl Gene Model	MGI:1347062	Creb3l1	cAMP responsive element binding protein 3-like 1	protein coding gene	2	-	91812673	91854515	26427
ENSMUSG00000061353	Ensembl Gene Model	MGI:103556	Cxcl12	chemokine (C-X-C motif) ligand 12	protein coding gene	6	+	117145496	117158328	20315
ENSMUSG00000024962	Ensembl Gene Model	MGI:106199	Vegfb	vascular endothelial growth factor B	protein coding gene	19	-	6959841	6965019	22340
ENSMUSG00000047242	Ensembl Gene Model	MGI:3039562	Taf9b	TATA-box binding protein associated factor 9B	protein coding gene	X	-	105250489	105264764	407786
ENSMUSG00000030089	Ensembl Gene Model	MGI:1918949	Slc41a3	solute carrier family 41, member 3	protein coding gene	6	+	90581707	90623394	71699
ENSMUSG00000021250	Ensembl Gene Model	MGI:95574	Fos	FBJ osteosarcoma oncogene	protein coding gene	12	+	85520664	85524047	14281
ENSMUSG00000038418	Ensembl Gene Model	MGI:95295	Egr1	early growth response 1	protein coding gene	18	+	34994260	34998009	13653
ENSMUSG00000033059	Ensembl Gene Model	MGI:97828	Pygb	brain glycogen phosphorylase	protein coding gene	2	+	150628716	150673668	110078
ENSMUSG00000017466	Ensembl Gene Model	MGI:98753	Timp2	tissue inhibitor of metalloproteinase 2	protein coding gene	11	-	118191887	118246237	21858
ENSMUSG00000030093	Ensembl Gene Model	MGI:98961	Wnt7a	wingless-type MMTV integration site family, member 7A	protein coding gene	6	-	91340963	91388335	22421
ENSMUSG00000003420	Ensembl Gene Model	MGI:103017	Fcgrt	Fc fragment of IgG receptor and transporter	protein coding gene	7	-	44742417	44753246	14132
ENSMUSG00000035277	Ensembl Gene Model	MGI:1097716	Arx	aristaless related homeobox	protein coding gene	X	+	92330113	92341963	11878
ENSMUSG00000028583	Ensembl Gene Model	MGI:103098	Pdpn	podoplanin	protein coding gene	4	-	142994001	143026134	14726
ENSMUSG00000019539	Ensembl Gene Model	MGI:1277122	Rcn3	reticulocalbin 3, EF-hand calcium binding domain	protein coding gene	7	-	44732337	44741645	52377
ENSMUSG00000000202	Ensembl Gene Model	MGI:1919264	Btbd17	BTB (POZ) domain containing 17	protein coding gene	11	-	114682043	114686771	72014
ENSMUSG00000026749	Ensembl Gene Model	MGI:1891638	Nek6	NIMA (never in mitosis gene a)-related expressed kinase 6	protein coding gene	2	+	38401655	38484618	59126
ENSMUSG00000029608	Ensembl Gene Model	MGI:102788	Rph3a	rabphilin 3A	protein coding gene	5	-	121078562	121148155	19894
ENSMUSG00000003657	Ensembl Gene Model	MGI:101914	Calb2	calbindin 2	protein coding gene	8	-	110869158	110894844	12308
ENSMUSG00000038486	Ensembl Gene Model	MGI:1927139	Sv2a	synaptic vesicle glycoprotein 2 a	protein coding gene	3	+	96088543	96102499	64051
ENSMUSG00000032773	Ensembl Gene Model	MGI:88396	Chrm1	cholinergic receptor, muscarinic 1, CNS	protein coding gene	19	+	8641369	8660970	12669
ENSMUSG00000020869	Ensembl Gene Model	MGI:2138133	Lrrc59	leucine rich repeat containing 59	protein coding gene	11	+	94520603	94536049	98238
ENSMUSG00000087408	Ensembl Gene Model	MGI:2136690	Cers1	ceramide synthase 1	protein coding gene	8	+	70768425	70784238	93898
ENSMUSG00000031090	Ensembl Gene Model	MGI:1926164	Nadsyn1	NAD synthetase 1	protein coding gene	7	-	143349321	143376586	78914
ENSMUSG00000025969	Ensembl Gene Model	MGI:1100492	Nrp2	neuropilin 2	protein coding gene	1	+	62742476	62857851	18187
ENSMUSG00000031453	Ensembl Gene Model	MGI:1197013	Rasa3	RAS p21 protein activator 3	protein coding gene	8	-	13617218	13727590	19414
ENSMUSG00000058886	Ensembl Gene Model	MGI:1858496	Deaf1	DEAF1, transcription factor	protein coding gene	7	-	140877093	140907603	54006
ENSMUSG00000019960	Ensembl Gene Model	MGI:1914853	Dusp6	dual specificity phosphatase 6	protein coding gene	10	+	99099093	99103351	67603
ENSMUSG00000031373	Ensembl Gene Model	MGI:1926249	Car5b	carbonic anhydrase 5b, mitochondrial	protein coding gene	X	-	162759818	162810993	56078
ENSMUSG00000002771	Ensembl Gene Model	MGI:95823	Grin2d	glutamate receptor, ionotropic, NMDA2D (epsilon 4)	protein coding gene	7	-	45481307	45520708	14814
ENSMUSG00000000346	Ensembl Gene Model	MGI:1344344	Dazap2	DAZ associated protein 2	protein coding gene	15	+	100513543	100518642	23994
ENSMUSG00000010025	Ensembl Gene Model	MGI:1353452	Aldh3a2	aldehyde dehydrogenase family 3, subfamily A2	protein coding gene	11	-	61114243	61158290	11671
ENSMUSG00000055409	Ensembl Gene Model	MGI:2443902	Nell1	NEL-like 1	protein coding gene	7	+	49625098	50513037	338352
ENSMUSG00000036545	Ensembl Gene Model	MGI:1347356	Adamts2	a disintegrin-like and metallopeptidase (reprolysin type) with thrombospondin type 1 motif, 2	protein coding gene	11	+	50492912	50698400	216725
ENSMUSG00000067825	Ensembl Gene Model	MGI:1921293	Pex26	peroxisomal biogenesis factor 26	protein coding gene	6	+	121160626	121175796	74043
ENSMUSG00000021943	Ensembl Gene Model	MGI:95684	Gdf10	growth differentiation factor 10	protein coding gene	14	+	33645544	33658471	14560
ENSMUSG00000020027	Ensembl Gene Model	MGI:1201787	Socs2	suppressor of cytokine signaling 2	protein coding gene	10	-	95221224	95253042	216233
ENSMUSG00000068523	Ensembl Gene Model	MGI:109164	Gng5	guanine nucleotide binding protein (G protein), gamma 5	protein coding gene	3	+	146205591	146211298	14707
ENSMUSG00000019080	Ensembl Gene Model	MGI:1916822	Mfsd3	major facilitator superfamily domain containing 3	protein coding gene	15	+	76585742	76588439	69572
ENSMUSG00000015085	Ensembl Gene Model	MGI:1096863	Entpd2	ectonucleoside triphosphate diphosphohydrolase 2	protein coding gene	2	+	25285886	25291333	12496
ENSMUSG00000031730	Ensembl Gene Model	MGI:1928378	Dhodh	dihydroorotate dehydrogenase	protein coding gene	8	-	110319876	110335330	56749
ENSMUSG00000049422	Ensembl Gene Model	MGI:2143558	Chchd10	coiled-coil-helix-coiled-coil-helix domain containing 10	protein coding gene	10	+	75768964	75773581	103172
ENSMUSG00000035686	Ensembl Gene Model	MGI:109126	Thrsp	thyroid hormone responsive	protein coding gene	7	-	97062140	97066757	21835
ENSMUSG00000025140	Ensembl Gene Model	MGI:2384795	Pycr1	pyrroline-5-carboxylate reductase 1	protein coding gene	11	-	120527591	120534602	209027
ENSMUSG00000004637	Ensembl Gene Model	MGI:1931237	Wwox	WW domain-containing oxidoreductase	protein coding gene	8	+	115166395	116079447	80707
ENSMUSG00000054252	Ensembl Gene Model	MGI:95524	Fgfr3	fibroblast growth factor receptor 3	protein coding gene	5	+	33879068	33894412	14184
ENSMUSG00000039252	Ensembl Gene Model	MGI:2180196	Lgi2	leucine-rich repeat LGI family, member 2	protein coding gene	5	-	52690859	52723689	246316
ENSMUSG00000024640	Ensembl Gene Model	MGI:2183441	Psat1	phosphoserine aminotransferase 1	protein coding gene	19	-	15882487	15902423	107272
ENSMUSG00000058135	Ensembl Gene Model	MGI:95860	Gstm1	glutathione S-transferase, mu 1	protein coding gene	3	-	107919571	107925289	14862
ENSMUSG00000024143	Ensembl Gene Model	MGI:1931553	Rhoq	ras homolog family member Q	protein coding gene	17	+	87270539	87307497	104215
ENSMUSG00000032500	Ensembl Gene Model	MGI:3039580	Dclk3	doublecortin-like kinase 3	protein coding gene	9	+	111268149	111318186	245038
ENSMUSG00000026185	Ensembl Gene Model	MGI:96440	Igfbp5	insulin-like growth factor binding protein 5	protein coding gene	1	-	72897224	72914024	16011
ENSMUSG00000033096	Ensembl Gene Model	MGI:1919131	Apmap	adipocyte plasma membrane associated protein	protein coding gene	2	-	150425000	150450487	71881
ENSMUSG00000027506	Ensembl Gene Model	MGI:107749	Tpd52	tumor protein D52	protein coding gene	3	-	8991590	9069824	21985
ENSMUSG00000018401	Ensembl Gene Model	MGI:2180699	Mtmr4	myotubularin related protein 4	protein coding gene	11	+	87482988	87507128	170749
ENSMUSG00000031066	Ensembl Gene Model	MGI:2384312	Usp11	ubiquitin specific peptidase 11	protein coding gene	X	+	20570148	20586778	236733
ENSMUSG00000017664	Ensembl Gene Model	MGI:2385166	Slc35c2	solute carrier family 35, member C2	protein coding gene	2	-	165118474	165129789	228875
ENSMUSG00000027984	Ensembl Gene Model	MGI:96009	Hadh	hydroxyacyl-Coenzyme A dehydrogenase	protein coding gene	3	-	131027068	131065750	15107
ENSMUSG00000022560	Ensembl Gene Model	MGI:1289288	Slc52a2	solute carrier protein 52, member 2	protein coding gene	15	+	76423032	76428808	52710
ENSMUSG00000030541	Ensembl Gene Model	MGI:96414	Idh2	isocitrate dehydrogenase 2 (NADP+), mitochondrial	protein coding gene	7	-	79744594	79765140	269951
ENSMUSG00000019082	Ensembl Gene Model	MGI:1915517	Slc25a22	solute carrier family 25 (mitochondrial carrier, glutamate), member 22	protein coding gene	7	-	141009662	141017787	68267
ENSMUSG00000030110	Ensembl Gene Model	MGI:97902	Ret	ret proto-oncogene	protein coding gene	6	-	118128706	118174679	19713
ENSMUSG00000011114	Ensembl Gene Model	MGI:1100877	Tbrg1	transforming growth factor beta regulated gene 1	protein coding gene	9	-	37560478	37568608	21376
ENSMUSG00000025735	Ensembl Gene Model	MGI:2384891	Rhbdl1	rhomboid like 1	protein coding gene	17	-	26053439	26056101	214951
ENSMUSG00000030785	Ensembl Gene Model	MGI:104649	Cox6a2	cytochrome c oxidase subunit 6A2	protein coding gene	7	-	127804607	127805538	12862
ENSMUSG00000046807	Ensembl Gene Model	MGI:2143657	Lrrc75b	leucine rich repeat containing 75B	protein coding gene	10	-	75385957	75396164	192734
ENSMUSG00000001053	Ensembl Gene Model	MGI:2442218	N4bp3	NEDD4 binding protein 3	protein coding gene	11	-	51533890	51541669	212706
ENSMUSG00000003865	Ensembl Gene Model	MGI:101805	Gys1	glycogen synthase 1, muscle	protein coding gene	7	+	45084268	45106043	14936
ENSMUSG00000040972	Ensembl Gene Model	MGI:2681842	Igsf21	immunoglobulin superfamily, member 21	protein coding gene	4	-	139754157	139974095	230868
ENSMUSG00000029364	Ensembl Gene Model	MGI:2144041	Wsb2	WD repeat and SOCS box-containing 2	protein coding gene	5	+	117495370	117516666	59043
ENSMUSG00000047935	Ensembl Gene Model	MGI:3645522	Sox1ot	Sox1 overlapping transcript	sense overlapping lncRNA gene	8	+	12435771	12486732	434280
ENSMUSG00000034706	Ensembl Gene Model	MGI:2685574	Dnai2	dynein axonemal intermediate chain 2	protein coding gene	11	+	114618234	114648715	432611
ENSMUSG00000024824	Ensembl Gene Model	MGI:1328356	Rad9a	RAD9 checkpoint clamp component A	protein coding gene	19	-	4245195	4251661	19367
ENSMUSG00000026504	Ensembl Gene Model	MGI:1924066	Sdccag8	serologically defined colon cancer antigen 8	protein coding gene	1	+	176642226	176848003	76816
ENSMUSG00000019929	Ensembl Gene Model	MGI:94872	Dcn	decorin	protein coding gene	10	+	97315471	97354005	13179
ENSMUSG00000022517	Ensembl Gene Model	MGI:2447670	Mgrn1	mahogunin, ring finger 1	protein coding gene	16	+	4704113	4756160	17237
ENSMUSG00000028661	Ensembl Gene Model	MGI:109378	Epha8	Eph receptor A8	protein coding gene	4	-	136656730	136684127	13842
ENSMUSG00000074457	Ensembl Gene Model	MGI:1915110	S100a16	S100 calcium binding protein A16	protein coding gene	3	+	90444561	90450458	67860
ENSMUSG00002076161	Ensembl Gene Model	MGI:103186	Rn7sk	RNA, 7SK, nuclear	snRNA gene	9	-	78082585	78082915	19817
ENSMUSG00000064128	Ensembl Gene Model	MGI:2684927	Cenpj	centromere protein J	protein coding gene	14	-	56764218	56812882	219103
ENSMUSG00000026456	Ensembl Gene Model	MGI:1919267	Cyb5r1	cytochrome b5 reductase 1	protein coding gene	1	+	134333519	134339476	72017
ENSMUSG00000056749	Ensembl Gene Model	MGI:109495	Nfil3	nuclear factor, interleukin 3, regulated	protein coding gene	13	-	53121245	53135109	18030
ENSMUSG00000037321	Ensembl Gene Model	MGI:98483	Tap1	transporter 1, ATP-binding cassette, sub-family B (MDR/TAP)	protein coding gene	17	+	34406530	34416199	21354
ENSMUSG00000047248	Ensembl Gene Model	MGI:2142166	C2cd3	C2 calcium-dependent domain containing 3	protein coding gene	7	+	100021440	100119359	277939
ENSMUSG00000030235	Ensembl Gene Model	MGI:1889679	Slco1c1	solute carrier organic anion transporter family, member 1c1	protein coding gene	6	+	141470094	141515903	58807
ENSMUSG00000060675	Ensembl Gene Model	MGI:2179715	Plaat3	phospholipase A and acyltransferase 3	protein coding gene	19	+	7534824	7565910	225845
ENSMUSG00000000001	Ensembl Gene Model	MGI:95773	Gnai3	guanine nucleotide binding protein (G protein), alpha inhibiting 3	protein coding gene	3	-	108014596	108053462	14679
ENSMUSG00000024654	Ensembl Gene Model	MGI:1913764	Asrgl1	asparaginase like 1	protein coding gene	19	-	9089083	9112930	66514
ENSMUSG00000023034	Ensembl Gene Model	MGI:1352454	Nr4a1	nuclear receptor subfamily 4, group A, member 1	protein coding gene	15	+	101152150	101172676	15370
ENSMUSG00000041608	Ensembl Gene Model	MGI:1321386	Entpd3	ectonucleoside triphosphate diphosphohydrolase 3	protein coding gene	9	+	120368884	120397393	215446
ENSMUSG00000029723	Ensembl Gene Model	MGI:1926079	Spacdr	sperm acrosome developmental regulator	protein coding gene	5	+	137744231	137766715	78829
ENSMUSG00000036880	Ensembl Gene Model	MGI:1098623	Acaa2	acetyl-Coenzyme A acyltransferase 2 (mitochondrial 3-oxoacyl-Coenzyme A thiolase)	protein coding gene	18	+	74912283	74939278	52538
ENSMUSG00000032402	Ensembl Gene Model	MGI:1201674	Smad3	SMAD family member 3	protein coding gene	9	-	63554049	63665276	17127
ENSMUSG00000062372	Ensembl Gene Model	MGI:1891247	Otof	otoferlin	protein coding gene	5	-	30524406	30619276	83762
ENSMUSG00000043843	Ensembl Gene Model	MGI:3607779	Tmem145	transmembrane protein 145	protein coding gene	7	+	25005531	25015620	330485
ENSMUSG00000003344	Ensembl Gene Model	MGI:1933831	Btbd2	BTB (POZ) domain containing 2	protein coding gene	10	-	80478457	80492328	208198
ENSMUSG00000031951	Ensembl Gene Model	MGI:2685024	Tmem231	transmembrane protein 231	protein coding gene	8	-	112638639	112660445	234740
ENSMUSG00000034936	Ensembl Gene Model	MGI:1933155	Arl4d	ADP-ribosylation factor-like 4D	protein coding gene	11	+	101556367	101558658	80981
ENSMUSG00000050530	Ensembl Gene Model	MGI:2442917	Fam171a1	family with sequence similarity 171, member A1	protein coding gene	2	+	3115261	3228843	269233
ENSMUSG00000040102	Ensembl Gene Model	MGI:2444786	Klhl42	kelch-like 42	protein coding gene	6	+	146992877	147014276	232539
ENSMUSG00000004031	Ensembl Gene Model	MGI:2443333	Brinp2	bone morphogenic protein/retinoic acid inducible neural-specific 2	protein coding gene	1	-	158072839	158183896	240843
ENSMUSG00000045216	Ensembl Gene Model	MGI:1354958	Hs6st1	heparan sulfate 6-O-sulfotransferase 1	protein coding gene	1	+	36107481	36145527	50785
ENSMUSG00000031661	Ensembl Gene Model	MGI:2135954	Nkd1	naked cuticle 1	protein coding gene	8	+	89247982	89321512	93960
ENSMUSG00000046230	Ensembl Gene Model	MGI:2444304	Vps13a	vacuolar protein sorting 13A	protein coding gene	19	-	16592730	16758297	271564
ENSMUSG00000054920	Ensembl Gene Model	MGI:1919028	Klhl5	kelch-like 5	protein coding gene	5	+	65264894	65325490	71778
ENSMUSG00000023011	Ensembl Gene Model	MGI:1919643	Faim2	Fas apoptotic inhibitory molecule 2	protein coding gene	15	-	99394893	99426046	72393
ENSMUSG00000024663	Ensembl Gene Model	MGI:1922010	Rab3il1	RAB3A interacting protein (rabin3)-like 1	protein coding gene	19	+	9979033	10015744	74760
ENSMUSG00000032803	Ensembl Gene Model	MGI:2448759	Cdv3	carnitine deficiency-associated gene expressed in ventricle 3	protein coding gene	9	-	103230301	103243034	321022
ENSMUSG00000017493	Ensembl Gene Model	MGI:96439	Igfbp4	insulin-like growth factor binding protein 4	protein coding gene	11	+	98930820	98943481	16010
ENSMUSG00000059824	Ensembl Gene Model	MGI:94866	Dbp	D site albumin promoter binding protein	protein coding gene	7	+	45354518	45359627	13170
ENSMUSG00000039533	Ensembl Gene Model	MGI:1922354	Mmd2	monocyte to macrophage differentiation-associated 2	protein coding gene	5	-	142549229	142594886	75104
ENSMUSG00000020866	Ensembl Gene Model	MGI:1201678	Cacna1g	calcium channel, voltage-dependent, T type, alpha 1G subunit	protein coding gene	11	-	94299217	94365024	12291
ENSMUSG00000068735	Ensembl Gene Model	MGI:2670995	Trp53i11	transformation related protein 53 inducible protein 11	protein coding gene	2	+	93017893	93032104	277414
ENSMUSG00000010663	Ensembl Gene Model	MGI:1923517	Fads1	fatty acid desaturase 1	protein coding gene	19	+	10160252	10174241	76267
ENSMUSG00000063065	Ensembl Gene Model	MGI:1346859	Mapk3	mitogen-activated protein kinase 3	protein coding gene	7	+	126358798	126364988	26417
ENSMUSG00000041468	Ensembl Gene Model	MGI:101909	Gpr12	G-protein coupled receptor 12	protein coding gene	5	-	146519208	146522049	14738
ENSMUSG00000032532	Ensembl Gene Model	MGI:88297	Cck	cholecystokinin	protein coding gene	9	-	121318890	121324760	12424
ENSMUSG00000001864	Ensembl Gene Model	MGI:1919598	Aif1l	allograft inflammatory factor 1-like	protein coding gene	2	+	31840315	31863454	108897
ENSMUSG00000045994	Ensembl Gene Model	MGI:1924148	B3gat1	beta-1,3-glucuronyltransferase 1 (glucuronosyltransferase P)	protein coding gene	9	+	26644813	26672646	76898
ENSMUSG00000056724	Ensembl Gene Model	MGI:2448554	Nbeal2	neurobeachin-like 2	protein coding gene	9	-	110453857	110483229	235627
ENSMUSG00000050423	Ensembl Gene Model	MGI:1923737	Ppp1r3g	protein phosphatase 1, regulatory subunit 3G	protein coding gene	13	+	36142822	36154371	76487
ENSMUSG00000053399	Ensembl Gene Model	MGI:2442600	Adamts18	a disintegrin-like and metallopeptidase (reprolysin type) with thrombospondin type 1 motif, 18	protein coding gene	8	-	114423758	114575370	208936
ENSMUSG00000022887	Ensembl Gene Model	MGI:88492	Masp1	mannan-binding lectin serine peptidase 1	protein coding gene	16	-	23268167	23339565	17174
ENSMUSG00000036882	Ensembl Gene Model	MGI:2673998	Arhgap33	Rho GTPase activating protein 33	protein coding gene	7	-	30221651	30234485	233071
ENSMUSG00000037362	Ensembl Gene Model	MGI:109185	Ccn3	cellular communication network factor 3	protein coding gene	15	+	54609306	54617158	18133
ENSMUSG00000051811	Ensembl Gene Model	MGI:3044182	Cox6b2	cytochrome c oxidase subunit 6B2	protein coding gene	7	-	4754791	4756093	333182
ENSMUSG00000041889	Ensembl Gene Model	MGI:1924802	Shisa4	shisa family member 4	protein coding gene	1	-	135299194	135302801	77552
ENSMUSG00000021136	Ensembl Gene Model	MGI:1929878	Smoc1	SPARC related modular calcium binding 1	protein coding gene	12	+	81073582	81233188	64075
ENSMUSG00000061232	Ensembl Gene Model	MGI:95904	H2-K1	histocompatibility 2, K1, K region	protein coding gene	17	-	34214991	34219321	14972
ENSMUSG00000022602	Ensembl Gene Model	MGI:88067	Arc	activity regulated cytoskeletal-associated protein	protein coding gene	15	-	74540932	74544419	11838
ENSMUSG00000031297	Ensembl Gene Model	MGI:1100521	Slc7a3	solute carrier family 7 (cationic amino acid transporter, y+ system), member 3	protein coding gene	X	-	100122816	100129626	11989
ENSMUSG00000026890	Ensembl Gene Model	MGI:1306803	Lhx6	LIM homeobox protein 6	protein coding gene	2	-	35971965	35995420	16874
ENSMUSG00000022055	Ensembl Gene Model	MGI:97313	Nefl	neurofilament, light polypeptide	protein coding gene	14	+	68321312	68326544	18039
ENSMUSG00000056972	Ensembl Gene Model	MGI:1351648	Magel2	MAGE family member L2	protein coding gene	7	+	62026758	62031388	27385
ENSMUSG00000066189	Ensembl Gene Model	MGI:1859165	Cacng3	calcium channel, voltage-dependent, gamma subunit 3	protein coding gene	7	+	122270967	122368616	54376
ENSMUSG00000027568	Ensembl Gene Model	MGI:97386	Ntsr1	neurotensin receptor 1	protein coding gene	2	+	180141769	180186772	18216
ENSMUSG00000001143	Ensembl Gene Model	MGI:2443010	Lman2l	lectin, mannose-binding 2-like	protein coding gene	1	-	36458952	36484352	214895
ENSMUSG00000007097	Ensembl Gene Model	MGI:88106	Atp1a2	ATPase, Na+/K+ transporting, alpha 2 polypeptide	protein coding gene	1	-	172099276	172125631	98660
ENSMUSG00000027893	Ensembl Gene Model	MGI:2385184	Ahcyl1	S-adenosylhomocysteine hydrolase-like 1	protein coding gene	3	-	107570436	107603876	229709
ENSMUSG00000026279	Ensembl Gene Model	MGI:1914276	Thap4	THAP domain containing 4	protein coding gene	1	-	93633113	93682560	67026
ENSMUSG00000039158	Ensembl Gene Model	MGI:2140340	Akna	AT-hook transcription factor	protein coding gene	4	-	63285362	63321591	100182
ENSMUSG00000066197	Ensembl Gene Model	MGI:2685341	Gpr139	G protein-coupled receptor 139	protein coding gene	7	-	118739970	118783761	209776
ENSMUSG00000031785	Ensembl Gene Model	MGI:1340051	Adgrg1	adhesion G protein-coupled receptor G1	protein coding gene	8	+	95701384	95740836	14766
ENSMUSG00000031380	Ensembl Gene Model	MGI:108037	Vegfd	vascular endothelial growth factor D	protein coding gene	X	+	163156374	163185646	14205
ENSMUSG00000022103	Ensembl Gene Model	MGI:1195462	Gfra2	glial cell line derived neurotrophic factor family receptor alpha 2	protein coding gene	14	+	71127560	71217278	14586
ENSMUSG00000022439	Ensembl Gene Model	MGI:2158329	Parvg	parvin, gamma	protein coding gene	15	+	84208388	84227179	64099
ENSMUSG00000076435	Ensembl Gene Model	MGI:2388287	Acsf2	acyl-CoA synthetase family member 2	protein coding gene	11	-	94447928	94492697	264895
ENSMUSG00000035105	Ensembl Gene Model	MGI:1932288	Egln3	egl-9 family hypoxia-inducible factor 3	protein coding gene	12	-	54225767	54250646	112407
ENSMUSG00000003934	Ensembl Gene Model	MGI:109196	Efnb3	ephrin B3	protein coding gene	11	-	69444918	69451031	13643
ENSMUSG00000030317	Ensembl Gene Model	MGI:109125	Timp4	tissue inhibitor of metalloproteinase 4	protein coding gene	6	-	115221405	115229166	110595
ENSMUSG00000024891	Ensembl Gene Model	MGI:1345278	Slc29a2	solute carrier family 29 (nucleoside transporters), member 2	protein coding gene	19	+	5073888	5082000	13340
ENSMUSG00000038539	Ensembl Gene Model	MGI:2141857	Atf5	activating transcription factor 5	protein coding gene	7	-	44461680	44466082	107503
ENSMUSG00000052374	Ensembl Gene Model	MGI:109192	Actn2	actinin alpha 2	protein coding gene	13	-	12284312	12355613	11472
ENSMUSG00000024960	Ensembl Gene Model	MGI:104778	Plcb3	phospholipase C, beta 3	protein coding gene	19	-	6931081	6951738	18797
ENSMUSG00000046329	Ensembl Gene Model	MGI:1914222	Slc25a23	solute carrier family 25 (mitochondrial carrier; phosphate carrier), member 23	protein coding gene	17	-	57350711	57366863	66972
ENSMUSG00000041911	Ensembl Gene Model	MGI:94901	Dlx1	distal-less homeobox 1	protein coding gene	2	+	71358457	71364325	13390
ENSMUSG00000067578	Ensembl Gene Model	MGI:2154433	Cbln4	cerebellin 4 precursor protein	protein coding gene	2	-	171878256	171885386	228942
ENSMUSG00000009216	Ensembl Gene Model	MGI:1926106	Fam163b	family with sequence similarity 163, member B	protein coding gene	2	-	27000391	27032489	109349
ENSMUSG00000020733	Ensembl Gene Model	MGI:1349482	Slc9a3r1	solute carrier family 9 (sodium/hydrogen exchanger), member 3 regulator 1	protein coding gene	11	+	115054167	115072007	26941
ENSMUSG00000030307	Ensembl Gene Model	MGI:95630	Slc6a11	solute carrier family 6 (neurotransmitter transporter, GABA), member 11	protein coding gene	6	+	114108202	114226847	243616
ENSMUSG00000020303	Ensembl Gene Model	MGI:1316731	Stc2	stanniocalcin 2	protein coding gene	11	-	31309441	31320061	20856
ENSMUSG00000079592	Ensembl Gene Model	MGI:2385958	C1qtnf5	C1q and tumor necrosis factor related protein 5	protein coding gene	9	+	44018542	44020484	235312
ENSMUSG00000025486	Ensembl Gene Model	MGI:1927665	Sirt3	sirtuin 3	protein coding gene	7	-	140443579	140462222	64384
ENSMUSG00000027217	Ensembl Gene Model	MGI:1917186	Tspan18	tetraspanin 18	protein coding gene	2	-	93032105	93164850	241556
ENSMUSG00000026765	Ensembl Gene Model	MGI:1919147	Lypd6b	LY6/PLAUR domain containing 6B	protein coding gene	2	+	49677700	49838861	71897
ENSMUSG00000037868	Ensembl Gene Model	MGI:95296	Egr2	early growth response 2	protein coding gene	10	+	67371305	67378018	13654
ENSMUSG00000038178	Ensembl Gene Model	MGI:2442746	Slc43a2	solute carrier family 43, member 2	protein coding gene	11	+	75422520	75468401	215113
ENSMUSG00000005813	Ensembl Gene Model	MGI:1922874	Metap1	methionyl aminopeptidase 1	protein coding gene	3	-	138164721	138195143	75624
ENSMUSG00000050721	Ensembl Gene Model	MGI:2143132	Plekho2	pleckstrin homology domain containing, family O member 2	protein coding gene	9	-	65459980	65487322	102595
ENSMUSG00000006218	Ensembl Gene Model	MGI:2685539	Fam131c	family with sequence similarity 131, member C	protein coding gene	4	+	141095531	141111486	277743
ENSMUSG00000026421	Ensembl Gene Model	MGI:88549	Csrp1	cysteine and glycine-rich protein 1	protein coding gene	1	+	135647799	135679970	13007
ENSMUSG00000020099	Ensembl Gene Model	MGI:894703	Unc5b	unc-5 netrin receptor B	protein coding gene	10	-	60598373	60667360	107449
ENSMUSG00000052026	Ensembl Gene Model	MGI:2147363	Slc6a7	solute carrier family 6 (neurotransmitter transporter, L-proline), member 7	protein coding gene	18	-	61128452	61147294	240332
ENSMUSG00000028234	Ensembl Gene Model	MGI:1914677	Rps20	ribosomal protein S20	protein coding gene	4	-	3831584	3835655	67427
ENSMUSG00000027253	Ensembl Gene Model	MGI:2442252	Lrp4	low density lipoprotein receptor-related protein 4	protein coding gene	2	+	91287856	91344124	228357
ENSMUSG00000002985	Ensembl Gene Model	MGI:88057	Apoe	apolipoprotein E	protein coding gene	7	-	19430034	19433113	11816
ENSMUSG00000038034	Ensembl Gene Model	MGI:2154090	Igsf8	immunoglobulin superfamily, member 8	protein coding gene	1	+	172139934	172147410	140559
ENSMUSG00000041482	Ensembl Gene Model	MGI:1918781	Piezo2	piezo-type mechanosensitive ion channel component 2	protein coding gene	18	-	63143284	63520254	667742
ENSMUSG00000024601	Ensembl Gene Model	MGI:1913557	Isoc1	isochorismatase domain containing 1	protein coding gene	18	+	58792554	58812642	66307
ENSMUSG00000046312	Ensembl Gene Model	MGI:2140300	Myorg	myogenesis regulating glycosidase (putative)	protein coding gene	4	-	41495604	41503076	329828
ENSMUSG00000022453	Ensembl Gene Model	MGI:1261422	Naga	N-acetyl galactosaminidase, alpha	protein coding gene	15	-	82213733	82223076	17939
ENSMUSG00000043557	Ensembl Gene Model	MGI:1922012	Mdga1	MAM domain containing glycosylphosphatidylinositol anchor 1	protein coding gene	17	-	30046930	30107557	74762
ENSMUSG00000036432	Ensembl Gene Model	MGI:108062	Siah2	siah E3 ubiquitin protein ligase 2	protein coding gene	3	-	58582359	58599821	20439
ENSMUSG00000024975	Ensembl Gene Model	MGI:107490	Pdcd4	programmed cell death 4	protein coding gene	19	+	53880662	53918291	18569
ENSMUSG00000020810	Ensembl Gene Model	MGI:2149481	Cygb	cytoglobin	protein coding gene	11	-	116536421	116545139	114886
ENSMUSG00000074892	Ensembl Gene Model	MGI:2136878	B3galt5	UDP-Gal:betaGlcNAc beta 1,3-galactosyltransferase, polypeptide 5	protein coding gene	16	+	96037001	96121059	93961
ENSMUSG00000019864	Ensembl Gene Model	MGI:2178759	Rtn4ip1	reticulon 4 interacting protein 1	protein coding gene	10	+	43777772	43823860	170728
ENSMUSG00000002458	Ensembl Gene Model	MGI:1915153	Rgs19	regulator of G-protein signaling 19	protein coding gene	2	-	181330212	181335770	56470
ENSMUSG00000006930	Ensembl Gene Model	MGI:1261831	Hap1	huntingtin-associated protein 1	protein coding gene	11	-	100238153	100246954	15114
ENSMUSG00000053519	Ensembl Gene Model	MGI:1917607	Kcnip1	Kv channel-interacting protein 1	protein coding gene	11	-	33579339	33943152	70357
ENSMUSG00000030605	Ensembl Gene Model	MGI:102768	Mfge8	milk fat globule EGF and factor V/VIII domain containing	protein coding gene	7	-	78783516	78798808	17304
ENSMUSG00000007682	Ensembl Gene Model	MGI:1338833	Dio2	deiodinase, iodothyronine, type II	protein coding gene	12	-	90691326	90705212	13371
ENSMUSG00000021866	Ensembl Gene Model	MGI:108481	Anxa11	annexin A11	protein coding gene	14	+	25842580	25887228	11744
ENSMUSG00000031513	Ensembl Gene Model	MGI:1915442	Leprotl1	leptin receptor overlapping transcript-like 1	protein coding gene	8	-	34602726	34613893	68192
ENSMUSG00000027488	Ensembl Gene Model	MGI:101772	Snta1	syntrophin, acidic 1	protein coding gene	2	-	154218234	154250004	20648
ENSMUSG00000043857	Ensembl Gene Model	MGI:3606200	Mgat5b	mannoside acetylglucosaminyltransferase 5, isoenzyme B	protein coding gene	11	+	116809689	116877774	268510
ENSMUSG00000027612	Ensembl Gene Model	MGI:1341867	Mmp24	matrix metallopeptidase 24	protein coding gene	2	+	155617262	155660286	17391
ENSMUSG00000070880	Ensembl Gene Model	MGI:95632	Gad1	glutamate decarboxylase 1	protein coding gene	2	+	70391644	70432358	14415
ENSMUSG00000041329	Ensembl Gene Model	MGI:88109	Atp1b2	ATPase, Na+/K+ transporting, beta 2 polypeptide	protein coding gene	11	-	69490562	69496768	11932
ENSMUSG00000018398	Ensembl Gene Model	MGI:894310	Septin8	septin 8	protein coding gene	11	+	53410224	53440432	20362
ENSMUSG00000021417	Ensembl Gene Model	MGI:1346064	Eci2	enoyl-Coenzyme A delta isomerase 2	protein coding gene	13	-	35161731	35211079	23986
ENSMUSG00000034522	Ensembl Gene Model	MGI:2682318	Zfp395	zinc finger protein 395	protein coding gene	14	+	65595838	65636379	380912

## Sheet: Broad Signature Genes - Up
Input	Input Type	MGI Gene/Marker ID	Symbol	Name	Feature Type	Chr	Strand	Start	End	Entrez Gene ID
ENSMUSG00000000085	Ensembl Gene Model	MGI:1352762	Scmh1	sex comb on midleg homolog 1	protein coding gene	4	+	120262478	120387383	29871
ENSMUSG00000000197	Ensembl Gene Model	MGI:2444306	Nalcn	sodium leak channel, non-selective	protein coding gene	14	-	123514046	123864556	338370
ENSMUSG00000000416	Ensembl Gene Model	MGI:1353467	Cttnbp2	cortactin binding protein 2	protein coding gene	6	-	18366477	18514842	30785
ENSMUSG00000000420	Ensembl Gene Model	MGI:894693	Galnt1	polypeptide N-acetylgalactosaminyltransferase 1	protein coding gene	18	+	24338401	24419873	14423
ENSMUSG00000000581	Ensembl Gene Model	MGI:1927354	C1d	C1D nuclear receptor co-repressor	protein coding gene	11	+	17207579	17219176	57316
ENSMUSG00000000738	Ensembl Gene Model	MGI:2385906	Spg7	SPG7, paraplegin matrix AAA peptidase subunit	protein coding gene	8	+	123792247	123824499	234847
ENSMUSG00000000787	Ensembl Gene Model	MGI:103064	Ddx3x	DEAD box helicase 3, X-linked	protein coding gene	X	+	13147261	13160222	13205
ENSMUSG00000000838	Ensembl Gene Model	MGI:95564	Fmr1	fragile X messenger ribonucleoprotein 1	protein coding gene	X	+	67722147	67761569	14265
ENSMUSG00000000915	Ensembl Gene Model	MGI:1352504	Hip1r	huntingtin interacting protein 1 related	protein coding gene	5	+	124111665	124141278	29816
ENSMUSG00000001017	Ensembl Gene Model	MGI:1913761	Chtop	chromatin target of PRMT1	protein coding gene	3	-	90406263	90416805	66511
ENSMUSG00000001089	Ensembl Gene Model	MGI:107629	Luzp1	leucine zipper protein 1	protein coding gene	4	+	136197072	136282091	269593
ENSMUSG00000001098	Ensembl Gene Model	MGI:2141207	Kctd10	potassium channel tetramerisation domain containing 10	protein coding gene	5	-	114501633	114518566	330171
ENSMUSG00000001151	Ensembl Gene Model	MGI:102722	Pcnt	pericentrin (kendrin)	protein coding gene	10	-	76187097	76278620	18541
ENSMUSG00000001156	Ensembl Gene Model	MGI:96908	Mxd1	MAX dimerization protein 1	protein coding gene	6	-	86624024	86646143	17119
ENSMUSG00000001228	Ensembl Gene Model	MGI:1338889	Uhrf1	ubiquitin-like, containing PHD and RING finger domains, 1	protein coding gene	17	+	56610337	56630486	18140
ENSMUSG00000001300	Ensembl Gene Model	MGI:105097	Efnb2	ephrin B2	protein coding gene	8	-	8667434	8711242	13642
ENSMUSG00000001376	Ensembl Gene Model	MGI:1920538	Vps50	VPS50 EARP/GARPII complex subunit	protein coding gene	6	+	3498393	3603531	73288
ENSMUSG00000001403	Ensembl Gene Model	MGI:1915862	Ube2c	ubiquitin-conjugating enzyme E2C	protein coding gene	2	+	164611849	164614822	68612
ENSMUSG00000001517	Ensembl Gene Model	MGI:1347487	Foxm1	forkhead box M1	protein coding gene	6	+	128339957	128352849	14235
ENSMUSG00000001542	Ensembl Gene Model	MGI:2183438	Ell2	elongation factor for RNA polymerase II 2	protein coding gene	13	+	75855603	75920480	192657
ENSMUSG00000001552	Ensembl Gene Model	MGI:96650	Jup	junction plakoglobin	protein coding gene	11	-	100259784	100288589	16480
ENSMUSG00000001569	Ensembl Gene Model	MGI:1861749	Nom1	nucleolar protein with MIF4G domain 1	protein coding gene	5	+	29637338	29658504	433864
ENSMUSG00000001627	Ensembl Gene Model	MGI:1316717	Ifrd1	interferon-related developmental regulator 1	protein coding gene	12	-	40253128	40273228	15982
ENSMUSG00000001632	Ensembl Gene Model	MGI:1926033	Brpf1	bromodomain and PHD finger containing, 1	protein coding gene	6	+	113284098	113301821	78783
ENSMUSG00000001946	Ensembl Gene Model	MGI:1916774	Esam	endothelial cell-specific adhesion molecule	protein coding gene	9	+	37439385	37449615	69524
ENSMUSG00000002055	Ensembl Gene Model	MGI:1927470	Spag5	sperm associated antigen 5	protein coding gene	11	+	78192412	78213283	54141
ENSMUSG00000002325	Ensembl Gene Model	MGI:107587	Irf9	interferon regulatory factor 9	protein coding gene	14	+	55841442	55847487	16391
ENSMUSG00000002396	Ensembl Gene Model	MGI:1924340	Ocel1	occludin/ELL domain containing 1	protein coding gene	8	+	71823942	71826333	77090
ENSMUSG00000002500	Ensembl Gene Model	MGI:1913461	Rpl3l	ribosomal protein L3-like	protein coding gene	17	+	24946800	24955117	66211
ENSMUSG00000002835	Ensembl Gene Model	MGI:1351331	Chaf1a	chromatin assembly factor 1, subunit A (p150)	protein coding gene	17	+	56347416	56375026	27221
ENSMUSG00000002881	Ensembl Gene Model	MGI:107564	Nab1	Ngfi-A binding protein 1	protein coding gene	1	-	52496453	52539838	17936
ENSMUSG00000002948	Ensembl Gene Model	MGI:1346871	Map2k7	mitogen-activated protein kinase kinase 7	protein coding gene	8	+	4288740	4297897	26400
ENSMUSG00000003039	Ensembl Gene Model	MGI:1915172	Fam32a	family with sequence similarity 32, member A	protein coding gene	8	+	72973574	72978262	67922
ENSMUSG00000003226	Ensembl Gene Model	MGI:894323	Ranbp2	RAN binding protein 2	protein coding gene	10	+	58282674	58329977	19386
ENSMUSG00000003279	Ensembl Gene Model	MGI:1346065	Dlgap1	DLG associated protein 1	protein coding gene	17	+	70276068	71128408	224997
ENSMUSG00000003382	Ensembl Gene Model	MGI:1350926	Etv3	ets variant 3	protein coding gene	3	+	87432884	87447465	27049
ENSMUSG00000003452	Ensembl Gene Model	MGI:1101760	Bicd1	BICD cargo adaptor 1	protein coding gene	6	+	149310384	149464827	12121
ENSMUSG00000003518	Ensembl Gene Model	MGI:1919599	Dusp3	dual specificity phosphatase 3 (vaccinia virus phosphatase VH1-related)	protein coding gene	11	-	101861969	101877839	72349
ENSMUSG00000003746	Ensembl Gene Model	MGI:104677	Man1a	mannosidase 1, alpha	protein coding gene	10	-	53780881	53952705	17155
ENSMUSG00000003778	Ensembl Gene Model	MGI:1925906	Brd8	bromodomain containing 8	protein coding gene	18	-	34731668	34757654	78656
ENSMUSG00000003779	Ensembl Gene Model	MGI:1201682	Kif20a	kinesin family member 20A	protein coding gene	18	+	34757677	34766330	19348
ENSMUSG00000003929	Ensembl Gene Model	MGI:1890752	Zfp81	zinc finger protein 81	protein coding gene	17	-	33548316	33577852	224694
ENSMUSG00000004591	Ensembl Gene Model	MGI:109211	Pkn2	protein kinase N2	protein coding gene	3	-	142496663	142587765	109333
ENSMUSG00000004677	Ensembl Gene Model	MGI:106624	Myo9b	myosin IXb	protein coding gene	8	+	71725358	71813357	17925
ENSMUSG00000004698	Ensembl Gene Model	MGI:1931221	Hdac9	histone deacetylase 9	protein coding gene	12	-	34097579	34967094	79221
ENSMUSG00000004880	Ensembl Gene Model	MGI:2138281	Lbr	lamin B receptor	protein coding gene	1	-	181642880	181669966	98386
ENSMUSG00000004891	Ensembl Gene Model	MGI:101784	Nes	nestin	protein coding gene	3	+	87878400	87887758	18008
ENSMUSG00000005267	Ensembl Gene Model	MGI:2176561	Zfp287	zinc finger protein 287	protein coding gene	11	-	62591182	62622731	170740
ENSMUSG00000005469	Ensembl Gene Model	MGI:97592	Prkaca	protein kinase, cAMP dependent, catalytic, alpha	protein coding gene	8	+	84699622	84723072	18747
ENSMUSG00000005470	Ensembl Gene Model	MGI:1914179	Asf1b	anti-silencing function 1B histone chaperone	protein coding gene	8	+	84682323	84696824	66929
ENSMUSG00000005506	Ensembl Gene Model	MGI:1342295	Celf1	CUGBP, Elav-like family member 1	protein coding gene	2	+	90770727	90849842	13046
ENSMUSG00000005609	Ensembl Gene Model	MGI:109345	Ctr9	CTR9 homolog, Paf1/RNA polymerase II complex component	protein coding gene	7	+	110628158	110655584	22083
ENSMUSG00000005686	Ensembl Gene Model	MGI:1096344	Ampd3	adenosine monophosphate deaminase 3	protein coding gene	7	+	110367413	110411612	11717
ENSMUSG00000006273	Ensembl Gene Model	MGI:109618	Atp6v1b2	ATPase, H+ transporting, lysosomal V1 subunit B2	protein coding gene	8	+	69541388	69566370	11966
ENSMUSG00000006398	Ensembl Gene Model	MGI:1859866	Cdc20	cell division cycle 20	protein coding gene	4	-	118290098	118294540	107995
ENSMUSG00000006585	Ensembl Gene Model	MGI:1914427	Cdt1	chromatin licensing and DNA replication factor 1	protein coding gene	8	+	123294754	123299869	67177
ENSMUSG00000006599	Ensembl Gene Model	MGI:1277216	Gtf2h1	general transcription factor II H, polypeptide 1	protein coding gene	7	+	46445527	46473224	14884
ENSMUSG00000006932	Ensembl Gene Model	MGI:88276	Ctnnb1	catenin (cadherin associated protein), beta 1	protein coding gene	9	+	120762466	120789573	12387
ENSMUSG00000007080	Ensembl Gene Model	MGI:1196391	Pole	polymerase (DNA directed), epsilon	protein coding gene	5	+	110434185	110485319	18973
ENSMUSG00000007617	Ensembl Gene Model	MGI:1347345	Homer1	homer scaffolding protein 1	protein coding gene	13	+	93436143	93541637	26556
ENSMUSG00000007812	Ensembl Gene Model	MGI:1919861	Zfp655	zinc finger protein 655	protein coding gene	5	+	145168525	145184112	72611
ENSMUSG00000007872	Ensembl Gene Model	MGI:96398	Id3	inhibitor of DNA binding 3	protein coding gene	4	+	135871133	135872703	15903
ENSMUSG00000008393	Ensembl Gene Model	MGI:1196368	Carhsp1	calcium regulated heat stable protein 1	protein coding gene	16	-	8476444	8490017	52502
ENSMUSG00000008475	Ensembl Gene Model	MGI:1915021	Arpc5	actin related protein 2/3 complex, subunit 5	protein coding gene	1	+	152642293	152651331	67771
ENSMUSG00000008763	Ensembl Gene Model	MGI:104676	Man1a2	mannosidase, alpha, class 1A, member 2	protein coding gene	3	-	100469519	100592789	17156
ENSMUSG00000008976	Ensembl Gene Model	MGI:95610	Gabpa	GA repeat binding protein, alpha	protein coding gene	16	+	84631813	84660667	14390
ENSMUSG00000009030	Ensembl Gene Model	MGI:1914716	Pdcl	phosducin-like	protein coding gene	2	-	37240086	37249344	67466
ENSMUSG00000009406	Ensembl Gene Model	MGI:101833	Elk1	ELK1, member of ETS oncogene family	protein coding gene	X	-	20799634	20816847	13712
ENSMUSG00000009828	Ensembl Gene Model	MGI:1934157	Cilk1	ciliogenesis associated kinase 1	protein coding gene	9	+	78016474	78079389	56542
ENSMUSG00000009907	Ensembl Gene Model	MGI:1100499	Vps4b	vacuolar protein sorting 4B	protein coding gene	1	-	106698518	106724455	20479
ENSMUSG00000010067	Ensembl Gene Model	MGI:1928386	Rassf1	Ras association (RalGDS/AF-6) domain family member 1	protein coding gene	9	+	107428754	107439466	56289
ENSMUSG00000010342	Ensembl Gene Model	MGI:1933227	Tex14	testis expressed gene 14	protein coding gene	11	+	87295891	87446649	83560
ENSMUSG00000010392	Ensembl Gene Model	MGI:1858260	Gosr1	golgi SNAP receptor complex member 1	protein coding gene	11	-	76617428	76654404	53334
ENSMUSG00000010505	Ensembl Gene Model	MGI:1100535	Myt1	myelin transcription factor 1	protein coding gene	2	+	181405125	181469590	17932
ENSMUSG00000010608	Ensembl Gene Model	MGI:1914289	Rbm25	RNA binding motif protein 25	protein coding gene	12	+	83678990	83729901	67039
ENSMUSG00000011751	Ensembl Gene Model	MGI:1890574	Sptbn4	spectrin beta, non-erythrocytic 4	protein coding gene	7	-	27055808	27147111	80297
ENSMUSG00000011960	Ensembl Gene Model	MGI:1328363	Ccnt1	cyclin T1	protein coding gene	15	-	98436570	98468340	12455
ENSMUSG00000012443	Ensembl Gene Model	MGI:1098231	Kif11	kinesin family member 11	protein coding gene	19	+	37364851	37410307	16551
ENSMUSG00000012535	Ensembl Gene Model	MGI:1196412	Tnpo3	transportin 3	protein coding gene	6	-	29540826	29609886	320938
ENSMUSG00000012640	Ensembl Gene Model	MGI:1917180	Zfp715	zinc finger protein 715	protein coding gene	7	-	42945946	42962724	69930
ENSMUSG00000013089	Ensembl Gene Model	MGI:1096867	Etv5	ets variant 5	protein coding gene	16	-	22200063	22258320	104156
ENSMUSG00000014077	Ensembl Gene Model	MGI:1927185	Chp1	calcineurin-like EF hand protein 1	protein coding gene	2	+	119378178	119417508	56398
ENSMUSG00000014426	Ensembl Gene Model	MGI:1346875	Map3k4	mitogen-activated protein kinase kinase kinase 4	protein coding gene	17	-	12446508	12537683	26407
ENSMUSG00000014496	Ensembl Gene Model	MGI:2145661	Ankrd28	ankyrin repeat domain 28	protein coding gene	14	-	31420725	31552608	105522
ENSMUSG00000014498	Ensembl Gene Model	MGI:2444029	Ankrd52	ankyrin repeat domain 52	protein coding gene	10	+	128212993	128229875	237615
ENSMUSG00000014503	Ensembl Gene Model	MGI:1858231	Pkd2l2	polycystic kidney disease 2-like 2	protein coding gene	18	+	34541553	34575842	53871
ENSMUSG00000014791	Ensembl Gene Model	MGI:2679007	Elmo3	engulfment and cell motility 3	protein coding gene	8	+	106032233	106037255	234683
ENSMUSG00000014837	Ensembl Gene Model	MGI:1921606	4931428F04Rik	RIKEN cDNA 4931428F04 gene	protein coding gene	8	-	106007041	106016160	74356
ENSMUSG00000015484	Ensembl Gene Model	MGI:3618859	Fam163a	family with sequence similarity 163, member A	protein coding gene	1	-	155951712	156032596	329274
ENSMUSG00000015501	Ensembl Gene Model	MGI:1338076	Hivep2	human immunodeficiency virus type I enhancer binding protein 2	protein coding gene	10	+	13841819	14027118	15273
ENSMUSG00000015733	Ensembl Gene Model	MGI:106222	Capza2	capping actin protein of muscle Z-line subunit alpha 2	protein coding gene	6	+	17637009	17666971	12343
ENSMUSG00000015749	Ensembl Gene Model	MGI:1913721	Anp32e	acidic (leucine-rich) nuclear phosphoprotein 32 family, member E	protein coding gene	3	+	95836557	95854699	66471
ENSMUSG00000015944	Ensembl Gene Model	MGI:1933384	Castor2	cytosolic arginine sensor for mTORC1 subunit 2	protein coding gene	5	+	134128587	134170621	80909
ENSMUSG00000016200	Ensembl Gene Model	MGI:2444490	Syt14	synaptotagmin XIV	protein coding gene	1	-	192573541	192718083	329324
ENSMUSG00000016382	Ensembl Gene Model	MGI:104807	Pls3	plastin 3 (T-isoform)	protein coding gene	X	-	74829260	74918788	102866
ENSMUSG00000016409	Ensembl Gene Model	MGI:1914300	Nkap	NFKB activating protein	protein coding gene	X	+	36390448	36414399	67050
ENSMUSG00000016458	Ensembl Gene Model	MGI:98968	Wt1	WT1 transcription factor	protein coding gene	2	+	104956874	105003959	22431
ENSMUSG00000016495	Ensembl Gene Model	MGI:1915009	Plgrkt	plasminogen receptor, C-terminal lysine transmembrane protein	protein coding gene	19	-	29326004	29339340	67759
ENSMUSG00000016619	Ensembl Gene Model	MGI:1351502	Nup50	nucleoporin 50	protein coding gene	15	+	84807612	84827164	18141
ENSMUSG00000016921	Ensembl Gene Model	MGI:1915246	Srsf6	serine and arginine-rich splicing factor 6	protein coding gene	2	+	162773448	162779041	67996
ENSMUSG00000016984	Ensembl Gene Model	MGI:1915395	Etaa1	Ewing tumor-associated antigen 1	protein coding gene	11	-	17888756	17903875	68145
ENSMUSG00000016995	Ensembl Gene Model	MGI:1328314	Matn4	matrilin 4	protein coding gene	2	-	164231313	164247080	17183
ENSMUSG00000017146	Ensembl Gene Model	MGI:104537	Brca1	breast cancer 1, early onset	protein coding gene	11	-	101379590	101442781	12189
ENSMUSG00000017376	Ensembl Gene Model	MGI:1201387	Nlk	nemo like kinase	protein coding gene	11	-	78457994	78588199	18099
ENSMUSG00000017418	Ensembl Gene Model	MGI:1923119	Arl5b	ADP-ribosylation factor-like 5B	protein coding gene	2	+	15060066	15087267	75869
ENSMUSG00000017550	Ensembl Gene Model	MGI:2442925	Atad5	ATPase family, AAA domain containing 5	protein coding gene	11	+	79980226	80026620	237877
ENSMUSG00000017716	Ensembl Gene Model	MGI:1203517	Birc5	baculoviral IAP repeat-containing 5	protein coding gene	11	+	117740077	117746569	11799
ENSMUSG00000018102	Ensembl Gene Model	MGI:1915274	H2bc4	H2B clustered histone 4	protein coding gene	13	+	23868182	23876805	68024
ENSMUSG00000018209	Ensembl Gene Model	MGI:1929004	Stk4	serine/threonine kinase 4	protein coding gene	2	+	163916033	163997444	58231
ENSMUSG00000018377	Ensembl Gene Model	MGI:1313291	Vezf1	vascular endothelial zinc finger 1	protein coding gene	11	+	87959105	87975555	22344
ENSMUSG00000018379	Ensembl Gene Model	MGI:98283	Srsf1	serine and arginine-rich splicing factor 1	protein coding gene	11	+	87938199	87944581	110809
ENSMUSG00000018412	Ensembl Gene Model	MGI:1923969	Kansl1	KAT8 regulatory NSL complex subunit 1	protein coding gene	11	-	104224055	104359687	76719
ENSMUSG00000018451	Ensembl Gene Model	MGI:1918001	6330403K07Rik	RIKEN cDNA 6330403K07 gene	protein coding gene	11	-	70922767	70924339	103712
ENSMUSG00000018474	Ensembl Gene Model	MGI:1344395	Chd3	chromodomain helicase DNA binding protein 3	protein coding gene	11	-	69234099	69260232	216848
ENSMUSG00000018541	Ensembl Gene Model	MGI:1914730	Cwc25	CWC25 spliceosome-associated protein	protein coding gene	11	-	97636307	97657382	67480
ENSMUSG00000018750	Ensembl Gene Model	MGI:1922830	Zbtb4	zinc finger and BTB domain containing 4	protein coding gene	11	+	69656738	69674849	75580
ENSMUSG00000018849	Ensembl Gene Model	MGI:2388637	Wwc1	WW, C2 and coiled-coil domain containing 1	protein coding gene	11	-	35729227	35871354	211652
ENSMUSG00000018909	Ensembl Gene Model	MGI:99473	Arrb1	arrestin, beta 1	protein coding gene	7	+	99184673	99255978	109689
ENSMUSG00000018986	Ensembl Gene Model	MGI:1329005	Slfn3	schlafen 3	protein coding gene	11	+	83082156	83105980	20557
ENSMUSG00000019143	Ensembl Gene Model	MGI:1918041	Hars2	histidyl-tRNA synthetase 2	protein coding gene	18	+	36916257	36925615	70791
ENSMUSG00000019297	Ensembl Gene Model	MGI:1915092	Nop9	NOP9 nucleolar protein	protein coding gene	14	+	55983150	55992957	67842
ENSMUSG00000019715	Ensembl Gene Model	MGI:1921662	Gle1	GLE1 RNA export mediator (yeast)	protein coding gene	2	+	29825421	29849444	74412
ENSMUSG00000019877	Ensembl Gene Model	MGI:1926228	Serinc1	serine incorporator 1	protein coding gene	10	-	57391870	57408625	56442
ENSMUSG00000019878	Ensembl Gene Model	MGI:96239	Hsf2	heat shock factor 2	protein coding gene	10	+	57362481	57389231	15500
ENSMUSG00000019880	Ensembl Gene Model	MGI:1920030	Rspo3	R-spondin 3	protein coding gene	10	-	29329102	29411863	72780
ENSMUSG00000019888	Ensembl Gene Model	MGI:1914819	Mgat4c	MGAT4 family, member C	protein coding gene	10	+	101517348	102227330	67569
ENSMUSG00000019907	Ensembl Gene Model	MGI:1309528	Ppp1r12a	protein phosphatase 1, regulatory subunit 12A	protein coding gene	10	+	107997913	108115846	17931
ENSMUSG00000019935	Ensembl Gene Model	MGI:3039629	Slc17a8	solute carrier family 17 (sodium-dependent inorganic phosphate cotransporter), member 8	protein coding gene	10	-	89409882	89457111	216227
ENSMUSG00000019942	Ensembl Gene Model	MGI:88351	Cdk1	cyclin-dependent kinase 1	protein coding gene	10	-	69170976	69188742	12534
ENSMUSG00000019944	Ensembl Gene Model	MGI:1916538	Rhobtb1	Rho-related BTB domain containing 1	protein coding gene	10	+	68987264	69127621	69288
ENSMUSG00000019971	Ensembl Gene Model	MGI:2384917	Cep290	centrosomal protein 290	protein coding gene	10	+	100323420	100410702	216274
ENSMUSG00000020063	Ensembl Gene Model	MGI:2135607	Sirt1	sirtuin 1	protein coding gene	10	-	63154784	63174814	93759
ENSMUSG00000020076	Ensembl Gene Model	MGI:2182303	Ddx50	DExD box helicase 50	protein coding gene	10	-	62451674	62486997	94213
ENSMUSG00000020078	Ensembl Gene Model	MGI:1353654	Vps26a	VPS26 retromer complex component A	protein coding gene	10	-	62291014	62322584	30930
ENSMUSG00000020096	Ensembl Gene Model	MGI:1923820	Tbata	thymus, brain and testes associated	protein coding gene	10	+	61007743	61024620	65971
ENSMUSG00000020115	Ensembl Gene Model	MGI:1929658	Tbk1	TANK-binding kinase 1	protein coding gene	10	-	121382360	121422692	56480
ENSMUSG00000020152	Ensembl Gene Model	MGI:1913963	Actr2	ARP2 actin-related protein 2	protein coding gene	11	-	20012304	20062913	66713
ENSMUSG00000020170	Ensembl Gene Model	MGI:1100860	Frs2	fibroblast growth factor receptor substrate 2	protein coding gene	10	-	116905332	116984439	327826
ENSMUSG00000020184	Ensembl Gene Model	MGI:96952	Mdm2	transformed mouse 3T3 cell double minute 2	protein coding gene	10	-	117524780	117546663	17246
ENSMUSG00000020189	Ensembl Gene Model	MGI:2443807	Osbpl8	oxysterol binding protein-like 8	protein coding gene	10	+	111000663	111133110	237542
ENSMUSG00000020250	Ensembl Gene Model	MGI:1354175	Txnrd1	thioredoxin reductase 1	protein coding gene	10	+	82669785	82733546	50493
ENSMUSG00000020258	Ensembl Gene Model	MGI:2444085	Glyctk	glycerate kinase	protein coding gene	9	-	106030056	106035337	235582
ENSMUSG00000020262	Ensembl Gene Model	MGI:891999	Adarb1	adenosine deaminase, RNA-specific, B1	protein coding gene	10	-	77126560	77254104	110532
ENSMUSG00000020273	Ensembl Gene Model	MGI:2442119	Papolg	poly(A) polymerase gamma	protein coding gene	11	-	23812646	23845253	216578
ENSMUSG00000020284	Ensembl Gene Model	MGI:1915134	Cfap410	cilia and flagella associated protein 410	protein coding gene	10	+	77814364	77821272	67884
ENSMUSG00000020300	Ensembl Gene Model	MGI:1914829	Cpeb4	cytoplasmic polyadenylation element binding protein 4	protein coding gene	11	+	31822211	31885634	67579
ENSMUSG00000020319	Ensembl Gene Model	MGI:2144467	Wdpcp	WD repeat containing planar cell polarity effector	protein coding gene	11	+	21521969	21848686	216560
ENSMUSG00000020330	Ensembl Gene Model	MGI:104667	Hmmr	hyaluronan mediated motility receptor (RHAMM)	protein coding gene	11	-	40592222	40624249	15366
ENSMUSG00000020361	Ensembl Gene Model	MGI:1342292	Hspa4	heat shock protein 4	protein coding gene	11	-	53150641	53191284	15525
ENSMUSG00000020396	Ensembl Gene Model	MGI:97309	Nefh	neurofilament, heavy polypeptide	protein coding gene	11	-	4888754	4898064	380684
ENSMUSG00000020447	Ensembl Gene Model	MGI:2685089	Npc1l1	NPC1 like intracellular cholesterol transporter 1	protein coding gene	11	-	6161013	6180143	237636
ENSMUSG00000020454	Ensembl Gene Model	MGI:1921453	Eif4enif1	eukaryotic translation initiation factor 4E nuclear import factor 1	protein coding gene	11	+	3152392	3194588	74203
ENSMUSG00000020482	Ensembl Gene Model	MGI:2144383	Ccdc117	coiled-coil domain containing 117	protein coding gene	11	-	5478887	5492187	104479
ENSMUSG00000020493	Ensembl Gene Model	MGI:2444496	Prr11	proline rich 11	protein coding gene	11	-	86979979	86999534	270906
ENSMUSG00000020526	Ensembl Gene Model	MGI:3051596	Znhit3	zinc finger, HIT type 3	protein coding gene	11	-	84801776	84807192	448850
ENSMUSG00000020530	Ensembl Gene Model	MGI:2387356	Ggnbp2	gametogenetin binding protein 2	protein coding gene	11	-	84723187	84761643	217039
ENSMUSG00000020580	Ensembl Gene Model	MGI:107926	Rock2	Rho-associated coiled-coil containing protein kinase 2	protein coding gene	12	+	16944896	17037824	19878
ENSMUSG00000020590	Ensembl Gene Model	MGI:2661416	Snx13	sorting nexin 13	protein coding gene	12	+	35097185	35197478	217463
ENSMUSG00000020607	Ensembl Gene Model	MGI:2145011	Lratd1	LRAT domain containing 1	protein coding gene	12	-	14197599	14202039	105005
ENSMUSG00000020611	Ensembl Gene Model	MGI:95768	Gna13	guanine nucleotide binding protein, alpha 13	protein coding gene	11	+	109253657	109292195	14674
ENSMUSG00000020674	Ensembl Gene Model	MGI:1916925	Pxdn	peroxidasin	protein coding gene	12	+	29987607	30067657	69675
ENSMUSG00000020687	Ensembl Gene Model	MGI:102685	Cdc27	cell division cycle 27	protein coding gene	11	-	104393571	104441446	217232
ENSMUSG00000020719	Ensembl Gene Model	MGI:105037	Ddx5	DEAD box helicase 5	protein coding gene	11	-	106671181	106680011	13207
ENSMUSG00000020776	Ensembl Gene Model	MGI:1922033	Fbf1	Fas (TNFRSF6) binding factor 1	protein coding gene	11	-	116033111	116058992	217335
ENSMUSG00000020793	Ensembl Gene Model	MGI:1337018	Galr2	galanin receptor 2	protein coding gene	11	+	116171765	116174764	14428
ENSMUSG00000020818	Ensembl Gene Model	MGI:1917150	Mfsd11	major facilitator superfamily domain containing 11	protein coding gene	11	+	116743266	116766461	69900
ENSMUSG00000020838	Ensembl Gene Model	MGI:96285	Slc6a4	solute carrier family 6 (neurotransmitter transporter, serotonin), member 4	protein coding gene	11	+	76889429	76923166	15567
ENSMUSG00000020863	Ensembl Gene Model	MGI:1914934	Luc7l3	LUC7-like 3 (S. cerevisiae)	protein coding gene	11	-	94181899	94213196	67684
ENSMUSG00000020892	Ensembl Gene Model	MGI:1345140	Aloxe3	arachidonate lipoxygenase 3	protein coding gene	11	+	69016722	69039941	23801
ENSMUSG00000020904	Ensembl Gene Model	MGI:1919110	Cfap52	cilia and flagella associated protein 52	protein coding gene	11	-	67815632	67856477	71860
ENSMUSG00000020914	Ensembl Gene Model	MGI:98790	Top2a	topoisomerase (DNA) II alpha	protein coding gene	11	-	98883769	98915015	21973
ENSMUSG00000020948	Ensembl Gene Model	MGI:1913939	Klhl28	kelch-like 28	protein coding gene	12	-	64985607	65012308	66689
ENSMUSG00000020990	Ensembl Gene Model	MGI:1918341	Cdkl1	cyclin-dependent kinase-like 1 (CDC2-related kinase)	protein coding gene	12	-	69793622	69838041	71091
ENSMUSG00000020994	Ensembl Gene Model	MGI:1100514	Pnn	pinin	protein coding gene	12	+	59113705	59120803	18949
ENSMUSG00000021000	Ensembl Gene Model	MGI:2159614	Mia2	MIA SH3 domain ER export factor 2	protein coding gene	12	+	59142368	59237006	338320
ENSMUSG00000021066	Ensembl Gene Model	MGI:1921241	Atl1	atlastin GTPase 1	protein coding gene	12	+	69939879	70010859	73991
ENSMUSG00000021068	Ensembl Gene Model	MGI:105108	Nin	ninein	protein coding gene	12	-	70058209	70160491	18080
ENSMUSG00000021112	Ensembl Gene Model	MGI:1927339	Pals1	protein associated with LIN7 1, MAGUK family member	protein coding gene	12	+	78795681	78887488	56217
ENSMUSG00000021113	Ensembl Gene Model	MGI:1922877	Snapc1	small nuclear RNA activating complex, polypeptide 1	protein coding gene	12	+	74011255	74035740	75627
ENSMUSG00000021147	Ensembl Gene Model	MGI:1920393	Wdr37	WD repeat domain 37	protein coding gene	13	-	8853004	8921945	207615
ENSMUSG00000021198	Ensembl Gene Model	MGI:2684729	Unc79	unc-79 homolog	protein coding gene	12	+	102915118	103150324	217843
ENSMUSG00000021215	Ensembl Gene Model	MGI:1927138	Net1	neuroepithelial cell transforming gene 1	protein coding gene	13	-	3932018	3968220	56349
ENSMUSG00000021223	Ensembl Gene Model	MGI:2386139	Papln	papilin, proteoglycan-like sulfated glycoprotein	protein coding gene	12	+	83810408	83839156	170721
ENSMUSG00000021224	Ensembl Gene Model	MGI:107423	Numb	NUMB endocytic adaptor protein	protein coding gene	12	-	83840808	83968708	18222
ENSMUSG00000021268	Ensembl Gene Model	MGI:1202886	Meg3	maternally expressed 3	lncRNA gene	12	+	109506884	109538160	17263
ENSMUSG00000021271	Ensembl Gene Model	MGI:1920055	Zfp839	zinc finger protein 839	protein coding gene	12	+	110816687	110836430	72805
ENSMUSG00000021282	Ensembl Gene Model	MGI:95309	Eif5	eukaryotic translation initiation factor 5	protein coding gene	12	+	111504535	111513187	217869
ENSMUSG00000021311	Ensembl Gene Model	MGI:894292	Mtr	5-methyltetrahydrofolate-homocysteine methyltransferase	protein coding gene	13	-	12197598	12272999	238505
ENSMUSG00000021385	Ensembl Gene Model	MGI:1922928	Ippk	inositol 1,3,4,5,6-pentakisphosphate 2-kinase	protein coding gene	13	+	49574725	49618049	75678
ENSMUSG00000021413	Ensembl Gene Model	MGI:109584	Prpf4b	pre-mRNA processing factor 4B	protein coding gene	13	+	35059285	35090047	19134
ENSMUSG00000021428	Ensembl Gene Model	MGI:1918590	Riok1	RIO kinase 1	protein coding gene	13	+	38220971	38245409	71340
ENSMUSG00000021470	Ensembl Gene Model	MGI:1923501	Ercc6l2	excision repair cross-complementing rodent repair deficiency, complementation group 6 like 2	protein coding gene	13	+	63963054	64048116	76251
ENSMUSG00000021500	Ensembl Gene Model	MGI:1920895	Ddx46	DEAD box helicase 46	protein coding gene	13	+	55782840	55829069	212880
ENSMUSG00000021510	Ensembl Gene Model	MGI:3036250	Zfp729a	zinc finger protein 729a	protein coding gene	13	-	67760882	67785910	212281
ENSMUSG00000021552	Ensembl Gene Model	MGI:1891694	Gkap1	G kinase anchoring protein 1	protein coding gene	13	-	58381160	58422691	56278
ENSMUSG00000021585	Ensembl Gene Model	MGI:1098236	Cast	calpastatin	protein coding gene	13	-	74840487	74956929	12380
ENSMUSG00000021587	Ensembl Gene Model	MGI:97511	Pcsk1	proprotein convertase subtilisin/kexin type 1	protein coding gene	13	+	75237945	75282980	18548
ENSMUSG00000021669	Ensembl Gene Model	MGI:1915268	Cert1	ceramide transporter 1	protein coding gene	13	+	96679126	96776675	68018
ENSMUSG00000021676	Ensembl Gene Model	MGI:2449975	Iqgap2	IQ motif containing GTPase activating protein 2	protein coding gene	13	-	95763685	96028788	544963
ENSMUSG00000021681	Ensembl Gene Model	MGI:1913799	Aggf1	angiogenic factor with G patch and FHA domains 1	protein coding gene	13	-	95487191	95511860	66549
ENSMUSG00000021703	Ensembl Gene Model	MGI:2444223	Serinc5	serine incorporator 5	protein coding gene	13	+	92747646	92848455	218442
ENSMUSG00000021720	Ensembl Gene Model	MGI:1919066	Rnf180	ring finger protein 180	protein coding gene	13	-	105267075	105431406	71816
ENSMUSG00000021725	Ensembl Gene Model	MGI:1098713	Parp8	poly (ADP-ribose) polymerase family, member 8	protein coding gene	13	-	116991356	117162073	52552
ENSMUSG00000021730	Ensembl Gene Model	MGI:1096392	Hcn1	hyperpolarization activated cyclic nucleotide gated potassium channel 1	protein coding gene	13	+	117738856	118117564	15165
ENSMUSG00000021738	Ensembl Gene Model	MGI:2179277	Atxn7	ataxin 7	protein coding gene	14	-	8362461	8508323	246103
ENSMUSG00000021743	Ensembl Gene Model	MGI:1859823	Fezf2	Fez family zinc finger 2	protein coding gene	14	+	10121574	10127669	54713
ENSMUSG00000021810	Ensembl Gene Model	MGI:1917851	Ecd	ecdysoneless cell cycle regulator	protein coding gene	14	-	20369927	20398189	70601
ENSMUSG00000021890	Ensembl Gene Model	MGI:1921677	Eaf1	ELL associated factor 1	protein coding gene	14	+	31217036	31231815	74427
ENSMUSG00000021891	Ensembl Gene Model	MGI:1914261	Mettl6	methyltransferase like 6	protein coding gene	14	-	31195535	31216997	67011
ENSMUSG00000021895	Ensembl Gene Model	MGI:1918954	Arhgef3	Rho guanine nucleotide exchange factor (GEF) 3	protein coding gene	14	+	26836856	27125868	71704
ENSMUSG00000021959	Ensembl Gene Model	MGI:1354386	Lats2	large tumor suppressor 2	protein coding gene	14	-	57927119	57983669	50523
ENSMUSG00000021962	Ensembl Gene Model	MGI:1923151	Dcp1a	decapping mRNA 1A	protein coding gene	14	+	30201492	30249020	75901
ENSMUSG00000021969	Ensembl Gene Model	MGI:1923215	Zdhhc20	zinc finger, DHHC domain containing 20	protein coding gene	14	-	58070160	58127733	75965
ENSMUSG00000021982	Ensembl Gene Model	MGI:1919141	Cdadc1	cytidine and dCMP deaminase domain containing 1	protein coding gene	14	-	59796837	59835408	71891
ENSMUSG00000022000	Ensembl Gene Model	MGI:1914552	Zc3h13	zinc finger CCCH type containing 13	protein coding gene	14	+	75521813	75581866	67302
ENSMUSG00000022012	Ensembl Gene Model	MGI:2444896	Enox1	ecto-NOX disulfide-thiol exchanger 1	protein coding gene	14	+	77394203	77959200	239188
ENSMUSG00000022020	Ensembl Gene Model	MGI:1914147	Naa16	N(alpha)-acetyltransferase 16, NatA auxiliary subunit	protein coding gene	14	-	79571947	79628228	66897
ENSMUSG00000022094	Ensembl Gene Model	MGI:2384851	Slc39a14	solute carrier family 39 (zinc transporter), member 14	protein coding gene	14	-	70540918	70588874	213053
ENSMUSG00000022114	Ensembl Gene Model	MGI:1345138	Spry2	sprouty RTK signaling antagonist 2	protein coding gene	14	-	106129381	106134253	24064
ENSMUSG00000022120	Ensembl Gene Model	MGI:1919736	Obi1	ORC ubiquitin ligase 1	protein coding gene	14	-	104714972	104760081	72486
ENSMUSG00000022124	Ensembl Gene Model	MGI:1354702	Fbxl3	F-box and leucine-rich repeat protein 3	protein coding gene	14	-	103317675	103337002	50789
ENSMUSG00000022151	Ensembl Gene Model	MGI:1914765	Ttc33	tetratricopeptide repeat domain 33	protein coding gene	15	+	5215006	5247817	67515
ENSMUSG00000022176	Ensembl Gene Model	MGI:2155260	Rem2	rad and gem related GTP binding protein 2	protein coding gene	14	+	54713557	54717888	140743
ENSMUSG00000022201	Ensembl Gene Model	MGI:1341890	Zfr	zinc finger RNA binding protein	protein coding gene	15	+	12117917	12185769	22763
ENSMUSG00000022237	Ensembl Gene Model	MGI:1917904	Ankrd33b	ankyrin repeat domain 33B	protein coding gene	15	-	31291624	31367872	67434
ENSMUSG00000022263	Ensembl Gene Model	MGI:1927230	Trio	triple functional domain (PTPRF interacting)	protein coding gene	15	-	27730737	28025934	223435
ENSMUSG00000022322	Ensembl Gene Model	MGI:1338802	Shcbp1	Shc SH2-domain binding protein 1	protein coding gene	8	-	4785976	4829567	20419
ENSMUSG00000022325	Ensembl Gene Model	MGI:1914974	Pop1	processing of precursor 1, ribonuclease P/MRP family, (S. cerevisiae)	protein coding gene	15	+	34495457	34530799	67724
ENSMUSG00000022350	Ensembl Gene Model	MGI:2146110	Washc5	WASH complex subunit 5	protein coding gene	15	-	59203846	59246016	223593
ENSMUSG00000022360	Ensembl Gene Model	MGI:1917722	Atad2	ATPase family, AAA domain containing 2	protein coding gene	15	-	57957440	57998478	70472
ENSMUSG00000022403	Ensembl Gene Model	MGI:1917606	St13	suppression of tumorigenicity 13	protein coding gene	15	-	81247869	81283951	70356
ENSMUSG00000022408	Ensembl Gene Model	MGI:2146227	Fam83f	family with sequence similarity 83, member F	protein coding gene	15	+	80556048	80584626	213956
ENSMUSG00000022491	Ensembl Gene Model	MGI:95759	Glycam1	glycosylation dependent cell adhesion molecule 1	protein coding gene	15	-	103471186	103473508	14663
ENSMUSG00000022526	Ensembl Gene Model	MGI:1918841	Zfp251	zinc finger protein 251	protein coding gene	15	-	76736331	76755635	71591
ENSMUSG00000022529	Ensembl Gene Model	MGI:1921370	Zfp263	zinc finger protein 263	protein coding gene	16	+	3561957	3568654	74120
ENSMUSG00000022538	Ensembl Gene Model	MGI:107236	Lsg1	large 60S subunit nuclear export GTPase 1	protein coding gene	16	-	30380187	30406430	224092
ENSMUSG00000022601	Ensembl Gene Model	MGI:2443876	Zbtb11	zinc finger and BTB domain containing 11	protein coding gene	16	+	55794246	55829276	271377
ENSMUSG00000022673	Ensembl Gene Model	MGI:103199	Mcm4	minichromosome maintenance complex component 4	protein coding gene	16	-	15441761	15455264	17217
ENSMUSG00000022687	Ensembl Gene Model	MGI:2151153	Boc	biregional cell adhesion molecule-related/down-regulated by oncogenes (Cdon) binding protein	protein coding gene	16	-	44305408	44379233	117606
ENSMUSG00000022704	Ensembl Gene Model	MGI:1922194	Qtrt2	queuine tRNA-ribosyltransferase accessory subunit 2	protein coding gene	16	-	43681770	43710071	106248
ENSMUSG00000022749	Ensembl Gene Model	MGI:1914831	Tbc1d23	TBC1 domain family, member 23	protein coding gene	16	-	56989225	57051867	67581
ENSMUSG00000022757	Ensembl Gene Model	MGI:1338041	Tfg	Trk-fused gene	protein coding gene	16	-	56510695	56537813	21787
ENSMUSG00000022762	Ensembl Gene Model	MGI:97282	Ncam2	neural cell adhesion molecule 2	protein coding gene	16	+	80997585	81423716	17968
ENSMUSG00000022783	Ensembl Gene Model	MGI:1354388	Spag6l	sperm associated antigen 6-like	protein coding gene	16	-	16570880	16647227	50525
ENSMUSG00000022799	Ensembl Gene Model	MGI:1333857	Arhgap31	Rho GTPase activating protein 31	protein coding gene	16	-	38418705	38533397	12549
ENSMUSG00000022807	Ensembl Gene Model	MGI:2146553	Osbpl11	oxysterol binding protein-like 11	protein coding gene	16	+	33005441	33063682	106326
ENSMUSG00000022822	Ensembl Gene Model	MGI:1351644	Abcc5	ATP-binding cassette, sub-family C (CFTR/MRP), member 5	protein coding gene	16	-	20150053	20245144	27416
ENSMUSG00000022829	Ensembl Gene Model	MGI:2443815	Stxbp5l	syntaxin binding protein 5-like	protein coding gene	16	-	36935304	37205324	207227
ENSMUSG00000022881	Ensembl Gene Model	MGI:2146571	Rfc4	replication factor C (activator 1) 4	protein coding gene	16	-	22932698	22946480	106344
ENSMUSG00000022911	Ensembl Gene Model	MGI:1915396	Arl13b	ADP-ribosylation factor-like 13B	protein coding gene	16	-	62614048	62667403	68146
ENSMUSG00000022914	Ensembl Gene Model	MGI:1890651	Brwd1	bromodomain and WD repeat domain containing 1	protein coding gene	16	-	95793292	95883726	93871
ENSMUSG00000022965	Ensembl Gene Model	MGI:107654	Ifngr2	interferon gamma receptor 2	protein coding gene	16	+	91343947	91360895	15980
ENSMUSG00000022974	Ensembl Gene Model	MGI:1914617	Paxbp1	PAX3 and PAX7 binding protein 1	protein coding gene	16	-	90810925	90841267	67367
ENSMUSG00000022983	Ensembl Gene Model	MGI:2146350	Scaf4	SR-related CTD-associated factor 4	protein coding gene	16	-	90022568	90081391	224432
ENSMUSG00000023072	Ensembl Gene Model	MGI:1919390	Cep89	centrosomal protein 89	protein coding gene	7	+	35096460	35138114	72140
ENSMUSG00000023286	Ensembl Gene Model	MGI:2153608	Ube2j2	ubiquitin-conjugating enzyme E2J 2	protein coding gene	4	+	156028288	156044061	140499
ENSMUSG00000023764	Ensembl Gene Model	MGI:1926137	Sfi1	Sfi1 homolog, spindle assembly associated (yeast)	protein coding gene	11	-	3081850	3143463	78887
ENSMUSG00000023800	Ensembl Gene Model	MGI:1344338	Tiam2	T cell lymphoma invasion and metastasis 2	protein coding gene	17	+	3376675	3569672	24001
ENSMUSG00000023845	Ensembl Gene Model	MGI:2387123	Lnpep	leucyl/cystinyl aminopeptidase	protein coding gene	17	-	17747985	17846303	240028
ENSMUSG00000023919	Ensembl Gene Model	MGI:1933744	Cenpq	centromere protein Q	protein coding gene	17	-	41233942	41245938	83815
ENSMUSG00000023927	Ensembl Gene Model	MGI:105084	Satb1	special AT-rich sequence binding protein 1	protein coding gene	17	-	52043215	52140318	20230
ENSMUSG00000023940	Ensembl Gene Model	MGI:1919665	Sgo1	shugoshin 1	protein coding gene	17	-	53981814	53996361	72415
ENSMUSG00000023945	Ensembl Gene Model	MGI:1927126	Slc5a7	solute carrier family 5 (choline transporter), member 7	protein coding gene	17	-	54580618	54606062	63993
ENSMUSG00000023961	Ensembl Gene Model	MGI:2682634	Enpp4	ectonucleotide pyrophosphatase/phosphodiesterase 4	protein coding gene	17	-	44407199	44416700	224794
ENSMUSG00000024006	Ensembl Gene Model	MGI:2442572	Stk38	serine/threonine kinase 38	protein coding gene	17	-	29189854	29226969	106504
ENSMUSG00000024011	Ensembl Gene Model	MGI:1921366	Pi16	peptidase inhibitor 16	protein coding gene	17	+	29537770	29547876	74116
ENSMUSG00000024030	Ensembl Gene Model	MGI:107704	Abcg1	ATP binding cassette subfamily G member 1	protein coding gene	17	+	31276668	31336958	11307
ENSMUSG00000024045	Ensembl Gene Model	MGI:1928488	Akap8	A kinase (PRKA) anchor protein 8	protein coding gene	17	-	32522646	32540212	56399
ENSMUSG00000024056	Ensembl Gene Model	MGI:1914302	Ndc80	NDC80 kinetochore complex component	protein coding gene	17	-	71803095	71833852	67052
ENSMUSG00000024078	Ensembl Gene Model	MGI:1921446	Ttc27	tetratricopeptide repeat domain 27	protein coding gene	17	+	75024730	75170565	74196
ENSMUSG00000024081	Ensembl Gene Model	MGI:109386	Cebpz	CCAAT/enhancer binding protein zeta	protein coding gene	17	-	79226435	79244495	12607
ENSMUSG00000024083	Ensembl Gene Model	MGI:2159342	Pja2	praja ring finger ubiquitin ligase 2	protein coding gene	17	-	64588001	64638878	224938
ENSMUSG00000024146	Ensembl Gene Model	MGI:1929655	Cript	cysteine-rich PDZ-binding protein	protein coding gene	17	+	87332989	87343236	56724
ENSMUSG00000024182	Ensembl Gene Model	MGI:1096327	Axin1	axin 1	protein coding gene	17	+	26357662	26414785	12005
ENSMUSG00000024218	Ensembl Gene Model	MGI:1916026	Taf11	TATA-box binding protein associated factor 11	protein coding gene	17	-	28120096	28128723	68776
ENSMUSG00000024256	Ensembl Gene Model	MGI:105094	Adcyap1	adenylate cyclase activating polypeptide 1	protein coding gene	17	+	93506445	93513965	11516
ENSMUSG00000024268	Ensembl Gene Model	MGI:1932407	Celf4	CUGBP, Elav-like family member 4	protein coding gene	18	-	25610689	25887214	108013
ENSMUSG00000024286	Ensembl Gene Model	MGI:1915224	Ccny	cyclin Y	protein coding gene	18	-	9312304	9450154	67974
ENSMUSG00000024293	Ensembl Gene Model	MGI:1925055	Esco1	establishment of sister chromatid cohesion N-acetyltransferase 1	protein coding gene	18	-	10566507	10610352	77805
ENSMUSG00000024298	Ensembl Gene Model	MGI:1921793	Zfp871	zinc finger protein 871	protein coding gene	17	-	32984470	33007261	208292
ENSMUSG00000024301	Ensembl Gene Model	MGI:2137414	Kifc5b	kinesin family member C5B	protein coding gene	17	+	27136065	27151553	16580
ENSMUSG00000024304	Ensembl Gene Model	MGI:88355	Cdh2	cadherin 2	protein coding gene	18	-	16721934	16942303	12558
ENSMUSG00000024330	Ensembl Gene Model	MGI:88447	Col11a2	collagen, type XI, alpha 2	protein coding gene	17	+	34258411	34285659	12815
ENSMUSG00000024425	Ensembl Gene Model	MGI:1929601	Ndfip1	Nedd4 family interacting protein 1	protein coding gene	18	+	38551960	38598250	65113
ENSMUSG00000024477	Ensembl Gene Model	MGI:1917514	Pggt1b	protein geranylgeranyltransferase type I, beta subunit	protein coding gene	18	-	46368418	46414060	225467
ENSMUSG00000024483	Ensembl Gene Model	MGI:1921733	Ankhd1	ankyrin repeat and KH domain containing 1	protein coding gene	18	+	36693656	36791961	108857
ENSMUSG00000024515	Ensembl Gene Model	MGI:894293	Smad4	SMAD family member 4	protein coding gene	18	-	73772080	73836851	17128
ENSMUSG00000024590	Ensembl Gene Model	MGI:96795	Lmnb1	lamin B1	protein coding gene	18	+	56840885	56886496	16906
ENSMUSG00000024736	Ensembl Gene Model	MGI:2147810	Tmem132a	transmembrane protein 132A	protein coding gene	19	-	10835186	10847304	98170
ENSMUSG00000024766	Ensembl Gene Model	MGI:2147592	Lipo3	lipase, member O3	protein coding gene	19	-	33532560	33568069	381236
ENSMUSG00000024773	Ensembl Gene Model	MGI:1916291	Atg2a	autophagy related 2A	protein coding gene	19	+	6291698	6312365	329015
ENSMUSG00000024791	Ensembl Gene Model	MGI:1915099	Cdca5	cell division cycle associated 5	protein coding gene	19	+	6135127	6141803	67849
ENSMUSG00000024795	Ensembl Gene Model	MGI:2444576	Kif20b	kinesin family member 20B	protein coding gene	19	+	34899761	34953145	240641
ENSMUSG00000024989	Ensembl Gene Model	MGI:1921357	Cep55	centrosomal protein 55	protein coding gene	19	+	38043459	38062871	74107
ENSMUSG00000025008	Ensembl Gene Model	MGI:1914840	Tctn3	tectonic family member 3	protein coding gene	19	-	40584890	40600677	67590
ENSMUSG00000025047	Ensembl Gene Model	MGI:1341788	Pdcd11	programmed cell death 11	protein coding gene	19	+	47079183	47119585	18572
ENSMUSG00000025060	Ensembl Gene Model	MGI:103241	Slk	STE20-like kinase	protein coding gene	19	+	47568458	47633685	20874
ENSMUSG00000025255	Ensembl Gene Model	MGI:2137668	Zfhx4	zinc finger homeodomain 4	protein coding gene	3	+	5283586	5480917	80892
ENSMUSG00000025324	Ensembl Gene Model	MGI:1330809	Atp10a	ATPase, class V, type 10A	protein coding gene	7	+	58305914	58479168	11982
ENSMUSG00000025340	Ensembl Gene Model	MGI:1929459	Rabgef1	RAB guanine nucleotide exchange factor (GEF) 1	protein coding gene	5	+	130200644	130243178	56715
ENSMUSG00000025451	Ensembl Gene Model	MGI:2384993	Paip1	polyadenylate binding protein-interacting protein 1	protein coding gene	13	+	119565137	119594754	218693
ENSMUSG00000025544	Ensembl Gene Model	MGI:1915309	Tm9sf2	transmembrane 9 superfamily member 2	protein coding gene	14	+	122344450	122397016	68059
ENSMUSG00000025558	Ensembl Gene Model	MGI:106321	Dock9	dedicator of cytokinesis 9	protein coding gene	14	-	121779458	122035249	105445
ENSMUSG00000025571	Ensembl Gene Model	MGI:2443265	Tnrc6c	trinucleotide repeat containing 6C	protein coding gene	11	+	117545115	117654265	217351
ENSMUSG00000025572	Ensembl Gene Model	MGI:1098686	Tmc6	transmembrane channel-like gene family 6	protein coding gene	11	-	117656811	117673019	217353
ENSMUSG00000025577	Ensembl Gene Model	MGI:88289	Cbx2	chromobox 2	protein coding gene	11	+	118913845	118922101	12416
ENSMUSG00000025597	Ensembl Gene Model	MGI:2442829	Klhl4	kelch-like 4	protein coding gene	X	+	113384030	113470526	237010
ENSMUSG00000025616	Ensembl Gene Model	MGI:1921362	Usp16	ubiquitin specific peptidase 16	protein coding gene	16	+	87251833	87280403	74112
ENSMUSG00000025646	Ensembl Gene Model	MGI:1925349	Atrip	ATR interacting protein	protein coding gene	9	-	108888815	108903192	235610
ENSMUSG00000025733	Ensembl Gene Model	MGI:2384892	Rhot2	ras homolog family member T2	protein coding gene	17	-	26057431	26063499	214952
ENSMUSG00000025747	Ensembl Gene Model	MGI:98878	Tyms	thymidylate synthase	protein coding gene	5	-	30263200	30278615	22171
ENSMUSG00000025810	Ensembl Gene Model	MGI:106206	Nrp1	neuropilin 1	protein coding gene	8	+	129085085	129229844	18186
ENSMUSG00000025862	Ensembl Gene Model	MGI:1098583	Stag2	stromal antigen 2	protein coding gene	X	+	41238194	41366062	20843
ENSMUSG00000025898	Ensembl Gene Model	MGI:1918023	Cwf19l2	CWF19-like 2, cell cycle control (S. pombe)	protein coding gene	9	+	3403592	3479236	244672
ENSMUSG00000025946	Ensembl Gene Model	MGI:2180917	Pth2r	parathyroid hormone 2 receptor	protein coding gene	1	+	65321215	65428403	213527
ENSMUSG00000025949	Ensembl Gene Model	MGI:1335106	Pikfyve	phosphoinositide kinase, FYVE type zinc finger containing	protein coding gene	1	+	65225842	65317854	18711
ENSMUSG00000025982	Ensembl Gene Model	MGI:1932339	Sf3b1	splicing factor 3b, subunit 1	protein coding gene	1	-	55024328	55066640	81898
ENSMUSG00000026024	Ensembl Gene Model	MGI:1921268	Als2	alsin Rho guanine nucleotide exchange factor	protein coding gene	1	-	59202085	59276390	74018
ENSMUSG00000026028	Ensembl Gene Model	MGI:1918077	Trak2	trafficking protein, kinesin binding 2	protein coding gene	1	-	58939608	59012589	70827
ENSMUSG00000026029	Ensembl Gene Model	MGI:1261423	Casp8	caspase 8	protein coding gene	1	+	58834533	58886662	12370
ENSMUSG00000026034	Ensembl Gene Model	MGI:107403	Clk1	CDC-like kinase 1	protein coding gene	1	-	58451147	58463247	12747
ENSMUSG00000026039	Ensembl Gene Model	MGI:1098767	Sgo2a	shugoshin 2A	protein coding gene	1	+	58035130	58065058	68549
ENSMUSG00000026042	Ensembl Gene Model	MGI:88458	Col5a2	collagen, type V, alpha 2	protein coding gene	1	-	45413491	45542442	12832
ENSMUSG00000026074	Ensembl Gene Model	MGI:1349394	Map4k4	mitogen-activated protein kinase kinase kinase kinase 4	protein coding gene	1	+	39940073	40065470	26921
ENSMUSG00000026083	Ensembl Gene Model	MGI:2441772	Eif5b	eukaryotic translation initiation factor 5B	protein coding gene	1	+	38037091	38094660	226982
ENSMUSG00000026113	Ensembl Gene Model	MGI:1931123	Inpp4a	inositol polyphosphate-4-phosphatase, type I	protein coding gene	1	+	37338946	37449817	269180
ENSMUSG00000026174	Ensembl Gene Model	MGI:1928902	Cnot9	CCR4-NOT transcription complex, subunit 9	protein coding gene	1	+	74545217	74570001	58184
ENSMUSG00000026196	Ensembl Gene Model	MGI:1328361	Bard1	BRCA1 associated RING domain 1	protein coding gene	1	-	71066690	71142300	12021
ENSMUSG00000026202	Ensembl Gene Model	MGI:1095410	Tuba4a	tubulin, alpha 4A	protein coding gene	1	-	75190872	75196509	22145
ENSMUSG00000026229	Ensembl Gene Model	MGI:1917497	Psmd1	proteasome (prosome, macropain) 26S subunit, non-ATPase, 1	protein coding gene	1	+	85992341	86067017	70247
ENSMUSG00000026270	Ensembl Gene Model	MGI:1344392	Capn10	calpain 10	protein coding gene	1	+	92862130	92875670	23830
ENSMUSG00000026271	Ensembl Gene Model	MGI:1929509	Gpr35	G protein-coupled receptor 35	protein coding gene	1	+	92878587	92914113	64095
ENSMUSG00000026288	Ensembl Gene Model	MGI:107357	Inpp5d	inositol polyphosphate-5-phosphatase D	protein coding gene	1	+	87548034	87648229	16331
ENSMUSG00000026335	Ensembl Gene Model	MGI:97475	Pam	peptidylglycine alpha-amidating monooxygenase	protein coding gene	1	-	97748816	98023578	18484
ENSMUSG00000026374	Ensembl Gene Model	MGI:109263	Tsn	translin	protein coding gene	1	-	118226244	118239463	22099
ENSMUSG00000026407	Ensembl Gene Model	MGI:88294	Cacna1s	calcium channel, voltage-dependent, L type, alpha 1S subunit	protein coding gene	1	+	135980488	136047560	12292
ENSMUSG00000026409	Ensembl Gene Model	MGI:107815	Pfkfb2	6-phosphofructo-2-kinase/fructose-2,6-biphosphatase 2	protein coding gene	1	-	130616919	130656990	18640
ENSMUSG00000026442	Ensembl Gene Model	MGI:104753	Nfasc	neurofascin	protein coding gene	1	-	132492428	132669535	269116
ENSMUSG00000026499	Ensembl Gene Model	MGI:2181074	Acbd3	acyl-Coenzyme A binding domain containing 3	protein coding gene	1	+	180553608	180581769	170760
ENSMUSG00000026553	Ensembl Gene Model	MGI:1334462	Copa	coatomer protein complex subunit alpha	protein coding gene	1	+	171910096	171949897	12847
ENSMUSG00000026554	Ensembl Gene Model	MGI:91860	Dcaf8	DDB1 and CUL4 associated factor 8	protein coding gene	1	+	171975574	172023960	98193
ENSMUSG00000026596	Ensembl Gene Model	MGI:87860	Abl2	v-abl Abelson murine leukemia viral oncogene 2 (arg, Abelson-related gene)	protein coding gene	1	+	156386356	156477138	11352
ENSMUSG00000026605	Ensembl Gene Model	MGI:1313302	Cenpf	centromere protein F	protein coding gene	1	-	189372803	189420283	108000
ENSMUSG00000026620	Ensembl Gene Model	MGI:2664902	Mark1	MAP/microtubule affinity regulating kinase 1	protein coding gene	1	-	184628986	184731767	226778
ENSMUSG00000026622	Ensembl Gene Model	MGI:109359	Nek2	NIMA (never in mitosis gene a)-related expressed kinase 2	protein coding gene	1	+	191553556	191565162	18005
ENSMUSG00000026634	Ensembl Gene Model	MGI:1196310	Angel2	angel homolog 2	protein coding gene	1	+	190657309	190679159	52477
ENSMUSG00000026646	Ensembl Gene Model	MGI:1890396	Suv39h2	suppressor of variegation 3-9 2	protein coding gene	2	-	3456852	3476068	64707
ENSMUSG00000026669	Ensembl Gene Model	MGI:1917274	Mcm10	minichromosome maintenance 10 replication initiation factor	protein coding gene	2	-	4995535	5017602	70024
ENSMUSG00000026683	Ensembl Gene Model	MGI:1914227	Nuf2	NUF2, NDC80 kinetochore complex component	protein coding gene	1	-	169325503	169359033	66977
ENSMUSG00000026705	Ensembl Gene Model	MGI:2444855	Klhl20	kelch-like 20	protein coding gene	1	-	160915945	160959078	226541
ENSMUSG00000026726	Ensembl Gene Model	MGI:1931256	Cubn	cubilin (intrinsic factor-cobalamin receptor)	protein coding gene	2	-	13281149	13496624	65969
ENSMUSG00000026728	Ensembl Gene Model	MGI:98932	Vim	vimentin	protein coding gene	2	+	13579122	13587637	22352
ENSMUSG00000026748	Ensembl Gene Model	MGI:1914698	Plxdc2	plexin domain containing 2	protein coding gene	2	+	16361115	16760650	67448
ENSMUSG00000026768	Ensembl Gene Model	MGI:109442	Itga8	integrin alpha 8	protein coding gene	2	-	12111443	12306733	241226
ENSMUSG00000026775	Ensembl Gene Model	MGI:1351651	Yme1l1	YME1-like 1 (S. cerevisiae)	protein coding gene	2	+	23046517	23089272	27377
ENSMUSG00000026779	Ensembl Gene Model	MGI:1914371	Mastl	microtubule associated serine/threonine kinase-like	protein coding gene	2	-	23006549	23046036	67121
ENSMUSG00000026803	Ensembl Gene Model	MGI:105044	Ttf1	transcription termination factor, RNA polymerase I	protein coding gene	2	+	28950274	28977668	22130
ENSMUSG00000026824	Ensembl Gene Model	MGI:104742	Kcnj3	potassium inwardly-rectifying channel, subfamily J, member 3	protein coding gene	2	+	55325982	55488157	16519
ENSMUSG00000026834	Ensembl Gene Model	MGI:2661081	Acvr1c	activin A receptor, type IC	protein coding gene	2	-	58157465	58247907	269275
ENSMUSG00000026836	Ensembl Gene Model	MGI:87911	Acvr1	activin A receptor, type 1	protein coding gene	2	-	58336450	58456840	11477
ENSMUSG00000026879	Ensembl Gene Model	MGI:95851	Gsn	gelsolin	protein coding gene	2	+	35146392	35197904	227753
ENSMUSG00000026889	Ensembl Gene Model	MGI:1915139	Rbm18	RNA binding motif protein 18	protein coding gene	2	-	36006091	36026716	67889
ENSMUSG00000026950	Ensembl Gene Model	MGI:97292	Neb	nebulin	protein coding gene	2	-	52026652	52228810	17996
ENSMUSG00000026987	Ensembl Gene Model	MGI:2442782	Baz2b	bromodomain adjacent to zinc finger domain, 2B	protein coding gene	2	-	59729707	60040183	407823
ENSMUSG00000027014	Ensembl Gene Model	MGI:2136773	Cwc22	CWC22 spliceosome-associated protein	protein coding gene	2	-	77711503	77776719	80744
ENSMUSG00000027079	Ensembl Gene Model	MGI:2138968	Clp1	CLP1, cleavage and polyadenylation factor I subunit	protein coding gene	2	-	84553466	84557631	98985
ENSMUSG00000027115	Ensembl Gene Model	MGI:2446977	Kif18a	kinesin family member 18A	protein coding gene	2	+	109111083	109172092	228421
ENSMUSG00000027171	Ensembl Gene Model	MGI:2442211	Prrg4	proline rich Gla (G-carboxyglutamic acid) 4 (transmembrane)	protein coding gene	2	-	104661086	104680221	228413
ENSMUSG00000027176	Ensembl Gene Model	MGI:1351825	Cstf3	cleavage stimulation factor, 3' pre-RNA, subunit 3	protein coding gene	2	+	104420868	104495774	228410
ENSMUSG00000027188	Ensembl Gene Model	MGI:2445082	Pamr1	peptidase domain containing associated with muscle regeneration 1	protein coding gene	2	+	102380357	102473386	210622
ENSMUSG00000027201	Ensembl Gene Model	MGI:104592	Myef2	myelin basic protein expression factor 2, repressor	protein coding gene	2	-	124926548	124965581	17876
ENSMUSG00000027248	Ensembl Gene Model	MGI:95834	Pdia3	protein disulfide isomerase associated 3	protein coding gene	2	+	121244383	121269168	14827
ENSMUSG00000027273	Ensembl Gene Model	MGI:98331	Snap25	synaptosomal-associated protein 25	protein coding gene	2	+	136555373	136624348	20614
ENSMUSG00000027284	Ensembl Gene Model	MGI:1916218	Cdan1	congenital dyserythropoietic anemia, type I (human)	protein coding gene	2	-	120546635	120561998	68968
ENSMUSG00000027304	Ensembl Gene Model	MGI:1309480	Rtf1	RTF1, Paf1/RNA polymerase II complex component	protein coding gene	2	+	119505549	119565888	76246
ENSMUSG00000027306	Ensembl Gene Model	MGI:2675669	Nusap1	nucleolar and spindle associated protein 1	protein coding gene	2	+	119448779	119480646	108907
ENSMUSG00000027309	Ensembl Gene Model	MGI:1923029	Dnaaf9	dynein axonemal assembly factor 9	protein coding gene	2	-	130548120	130682565	228602
ENSMUSG00000027323	Ensembl Gene Model	MGI:97890	Rad51	RAD51 recombinase	protein coding gene	2	+	118943295	118966554	19361
ENSMUSG00000027331	Ensembl Gene Model	MGI:1289298	Knstrn	kinetochore-localized astrin/SPAG5 binding	protein coding gene	2	+	118644470	118667691	51944
ENSMUSG00000027340	Ensembl Gene Model	MGI:1859682	Slc23a2	solute carrier family 23 (nucleobase transporters), member 2	protein coding gene	2	-	131894416	131987028	54338
ENSMUSG00000027350	Ensembl Gene Model	MGI:88395	Chgb	chromogranin B	protein coding gene	2	+	132623562	132636999	12653
ENSMUSG00000027365	Ensembl Gene Model	MGI:1929996	Trpm7	transient receptor potential cation channel, subfamily M, member 7	protein coding gene	2	-	126633485	126718150	58800
ENSMUSG00000027366	Ensembl Gene Model	MGI:1913802	Sppl2a	signal peptide peptidase like 2A	protein coding gene	2	-	126732311	126775155	66552
ENSMUSG00000027379	Ensembl Gene Model	MGI:1100510	Bub1	BUB1, mitotic checkpoint serine/threonine kinase	protein coding gene	2	-	127643036	127673785	12235
ENSMUSG00000027420	Ensembl Gene Model	MGI:101770	Bfsp1	beaded filament structural protein 1, in lens-CP94	protein coding gene	2	-	143668448	143705093	12075
ENSMUSG00000027427	Ensembl Gene Model	MGI:1924086	Polr3f	polymerase (RNA) III (DNA directed) polypeptide F	protein coding gene	2	+	144369665	144383699	70408
ENSMUSG00000027433	Ensembl Gene Model	MGI:894687	Xrn2	5'-3' exoribonuclease 2	protein coding gene	2	+	146854916	146919920	24128
ENSMUSG00000027465	Ensembl Gene Model	MGI:1914481	Tbc1d20	TBC1 domain family, member 20	protein coding gene	2	+	152135748	152155916	67231
ENSMUSG00000027469	Ensembl Gene Model	MGI:1919369	Tpx2	TPX2, microtubule-associated	protein coding gene	2	+	152689884	152737241	72119
ENSMUSG00000027525	Ensembl Gene Model	MGI:1921439	Phactr3	phosphatase and actin regulator 3	protein coding gene	2	+	177760768	177980285	74189
ENSMUSG00000027534	Ensembl Gene Model	MGI:1921968	Snx16	sorting nexin 16	protein coding gene	3	-	10482877	10505162	74718
ENSMUSG00000027540	Ensembl Gene Model	MGI:97805	Ptpn1	protein tyrosine phosphatase, non-receptor type 1	protein coding gene	2	+	167773977	167821305	19246
ENSMUSG00000027544	Ensembl Gene Model	MGI:102463	Nfatc2	nuclear factor of activated T cells, cytoplasmic, calcineurin dependent 2	protein coding gene	2	-	168318330	168443577	18019
ENSMUSG00000027589	Ensembl Gene Model	MGI:1923927	Pcmtd2	protein-L-isoaspartate (D-aspartate) O-methyltransferase domain containing 2	protein coding gene	2	+	181479647	181499254	245867
ENSMUSG00000027651	Ensembl Gene Model	MGI:1917720	Rprd1b	regulation of nuclear pre-mRNA domain containing 1B	protein coding gene	2	+	157870395	157920127	70470
ENSMUSG00000027674	Ensembl Gene Model	MGI:1916672	Pex5l	peroxisomal biogenesis factor 5-like	protein coding gene	3	-	33003557	33197396	58869
ENSMUSG00000027699	Ensembl Gene Model	MGI:95281	Ect2	ect2 oncogene	protein coding gene	3	-	27151371	27208027	13605
ENSMUSG00000027715	Ensembl Gene Model	MGI:108069	Ccna2	cyclin A2	protein coding gene	3	-	36619014	36626299	12428
ENSMUSG00000027765	Ensembl Gene Model	MGI:105049	P2ry1	purinergic receptor P2Y, G-protein coupled 1	protein coding gene	3	+	60910216	60916403	18441
ENSMUSG00000027770	Ensembl Gene Model	MGI:1919412	Dhx36	DEAH (Asp-Glu-Ala-His) box polypeptide 36	protein coding gene	3	-	62375434	62414425	72162
ENSMUSG00000027835	Ensembl Gene Model	MGI:1928396	Pdcd10	programmed cell death 10	protein coding gene	3	-	75423797	75464159	56426
ENSMUSG00000027845	Ensembl Gene Model	MGI:2156057	Dclre1b	DNA cross-link repair 1B	protein coding gene	3	-	103707921	103716703	140917
ENSMUSG00000027883	Ensembl Gene Model	MGI:1923373	Gpsm2	G-protein signalling modulator 2 (AGS3-like, C. elegans)	protein coding gene	3	-	108585954	108629625	76123
ENSMUSG00000027887	Ensembl Gene Model	MGI:1328311	Sypl2	synaptophysin-like 2	protein coding gene	3	-	108119582	108133915	17306
ENSMUSG00000027966	Ensembl Gene Model	MGI:88446	Col11a1	collagen, type XI, alpha 1	protein coding gene	3	+	113824189	114014367	12814
ENSMUSG00000027977	Ensembl Gene Model	MGI:1932544	Ndst3	N-deacetylase/N-sulfotransferase (heparan glucosaminyl) 3	protein coding gene	3	-	123319815	123484502	83398
ENSMUSG00000028068	Ensembl Gene Model	MGI:3028642	Iqgap3	IQ motif containing GTPase activating protein 3	protein coding gene	3	+	87989309	88028355	404710
ENSMUSG00000028073	Ensembl Gene Model	MGI:1920432	Pear1	platelet endothelial aggregation receptor 1	protein coding gene	3	-	87656404	87676262	73182
ENSMUSG00000028126	Ensembl Gene Model	MGI:107929	Pip5k1a	phosphatidylinositol-4-phosphate 5-kinase, type 1 alpha	protein coding gene	3	-	94965841	95014241	18720
ENSMUSG00000028175	Ensembl Gene Model	MGI:1923381	Depdc1a	DEP domain containing 1a	protein coding gene	3	+	159201070	159235592	76131
ENSMUSG00000028191	Ensembl Gene Model	MGI:1337994	Bcl10	B cell leukemia/lymphoma 10	protein coding gene	3	+	145630017	145640121	12042
ENSMUSG00000028211	Ensembl Gene Model	MGI:1926609	Trp53inp1	transformation related protein 53 inducible nuclear protein 1	protein coding gene	4	+	11156441	11174379	60599
ENSMUSG00000028226	Ensembl Gene Model	MGI:1276107	Mmp16	matrix metallopeptidase 16	protein coding gene	4	+	17853072	18117479	17389
ENSMUSG00000028243	Ensembl Gene Model	MGI:1915303	Ubxn2b	UBX domain protein 2B	protein coding gene	4	+	6191105	6219788	68053
ENSMUSG00000028249	Ensembl Gene Model	MGI:1337026	Sdcbp	syndecan binding protein	protein coding gene	4	+	6365654	6396122	53378
ENSMUSG00000028278	Ensembl Gene Model	MGI:1098604	Rragd	Ras-related GTP binding D	protein coding gene	4	+	32983037	33022180	52187
ENSMUSG00000028282	Ensembl Gene Model	MGI:1349399	Casp8ap2	caspase 8 associated protein 2	protein coding gene	4	+	32615462	32653271	26885
ENSMUSG00000028284	Ensembl Gene Model	MGI:1346877	Map3k7	mitogen-activated protein kinase kinase kinase 7	protein coding gene	4	+	31964097	32023467	26409
ENSMUSG00000028309	Ensembl Gene Model	MGI:1925927	Rnf20	ring finger protein 20	protein coding gene	4	+	49632006	49656887	109331
ENSMUSG00000028312	Ensembl Gene Model	MGI:106067	Smc2	structural maintenance of chromosomes 2	protein coding gene	4	+	52439243	52488260	14211
ENSMUSG00000028345	Ensembl Gene Model	MGI:1344413	Tex10	testis expressed gene 10	protein coding gene	4	-	48430858	48473459	269536
ENSMUSG00000028351	Ensembl Gene Model	MGI:1928478	Brinp1	bone morphogenic protein/retinoic acid inducible neural specific 1	protein coding gene	4	-	68679751	68872634	56710
ENSMUSG00000028354	Ensembl Gene Model	MGI:1859252	Fmn2	formin 2	protein coding gene	1	+	174329391	174650295	54418
ENSMUSG00000028370	Ensembl Gene Model	MGI:97479	Pappa	pregnancy-associated plasma protein A	protein coding gene	4	+	65042411	65275746	18491
ENSMUSG00000028382	Ensembl Gene Model	MGI:1923334	Ptbp3	polypyrimidine tract binding protein 3	protein coding gene	4	-	59471868	59549364	230257
ENSMUSG00000028397	Ensembl Gene Model	MGI:1924054	Kdm4c	lysine (K)-specific demethylase 4C	protein coding gene	4	+	74160734	74324097	76804
ENSMUSG00000028465	Ensembl Gene Model	MGI:1099832	Tln1	talin 1	protein coding gene	4	-	43531513	43562583	21894
ENSMUSG00000028475	Ensembl Gene Model	MGI:1918656	Spaar	small regulatory polypeptide of amino acid response	protein coding gene	4	+	43730034	43734534	71406
ENSMUSG00000028476	Ensembl Gene Model	MGI:1855698	Reck	reversion-inducing-cysteine-rich protein with kazal motifs	protein coding gene	4	+	43875530	43944806	53614
ENSMUSG00000028522	Ensembl Gene Model	MGI:1918398	Mier1	MEIR1 treanscription regulator	protein coding gene	4	+	102971587	103022951	71148
ENSMUSG00000028525	Ensembl Gene Model	MGI:99557	Pde4b	phosphodiesterase 4B, cAMP specific	protein coding gene	4	+	101944740	102464456	18578
ENSMUSG00000028546	Ensembl Gene Model	MGI:107427	Elavl4	ELAV like RNA binding protein 4	protein coding gene	4	-	110060919	110209106	15572
ENSMUSG00000028556	Ensembl Gene Model	MGI:1914549	Dock7	dedicator of cytokinesis 7	protein coding gene	4	-	98824908	99009152	67299
ENSMUSG00000028558	Ensembl Gene Model	MGI:2140435	Calr4	calreticulin 4	protein coding gene	4	+	109091682	109111768	108802
ENSMUSG00000028610	Ensembl Gene Model	MGI:1927125	Dmrtb1	DMRT-like family B with proline-rich C-terminal, 1	protein coding gene	4	-	107533487	107541427	56296
ENSMUSG00000028613	Ensembl Gene Model	MGI:1340044	Lrp8	low density lipoprotein receptor-related protein 8, apolipoprotein e receptor	protein coding gene	4	+	107659337	107734037	16975
ENSMUSG00000028668	Ensembl Gene Model	MGI:1351315	Eloa	elongin A	protein coding gene	4	-	135730681	135748960	27224
ENSMUSG00000028678	Ensembl Gene Model	MGI:1921054	Kif2c	kinesin family member 2C	protein coding gene	4	-	117016830	117039821	73804
ENSMUSG00000028701	Ensembl Gene Model	MGI:1915325	Lurap1	leucine rich adaptor protein 1	protein coding gene	4	-	115993925	116001813	68075
ENSMUSG00000028702	Ensembl Gene Model	MGI:894697	Rad54l	RAD54 like (S. cerevisiae)	protein coding gene	4	-	115951461	115980887	19366
ENSMUSG00000028717	Ensembl Gene Model	MGI:98480	Tal1	T cell acute lymphocytic leukemia 1	protein coding gene	4	+	114913623	114928952	21349
ENSMUSG00000028718	Ensembl Gene Model	MGI:107477	Stil	Scl/Tal1 interrupting locus	protein coding gene	4	+	114857356	114900393	20460
ENSMUSG00000028780	Ensembl Gene Model	MGI:107557	Sema3c	sema domain, immunoglobulin domain (Ig), short basic domain, secreted, (semaphorin) 3C	protein coding gene	5	+	17779814	17935266	20348
ENSMUSG00000028845	Ensembl Gene Model	MGI:1346335	Tekt2	tektin 2	protein coding gene	4	-	126215914	126219481	24084
ENSMUSG00000028890	Ensembl Gene Model	MGI:101786	Mtf1	metal response element binding transcription factor 1	protein coding gene	4	+	124696342	124743593	17764
ENSMUSG00000028907	Ensembl Gene Model	MGI:1914455	Utp11	UTP11 small subunit processome component	protein coding gene	4	-	124571953	124587393	67205
ENSMUSG00000028933	Ensembl Gene Model	MGI:1927345	Xrcc2	X-ray repair complementing defective repair in Chinese hamster cells 2	protein coding gene	5	-	25894812	25910795	57434
ENSMUSG00000028961	Ensembl Gene Model	MGI:97553	Pgd	phosphogluconate dehydrogenase	protein coding gene	4	-	149234448	149251162	110208
ENSMUSG00000028962	Ensembl Gene Model	MGI:109351	Slc4a2	solute carrier family 4 (anion exchanger), member 2	protein coding gene	5	+	24628939	24645945	20535
ENSMUSG00000028974	Ensembl Gene Model	MGI:1196227	Dffa	DNA fragmentation factor, alpha subunit	protein coding gene	4	+	149188603	149205104	13347
ENSMUSG00000029070	Ensembl Gene Model	MGI:1922011	Mxra8	matrix-remodelling associated 8	protein coding gene	4	+	155924137	155928545	74761
ENSMUSG00000029108	Ensembl Gene Model	MGI:1860487	Pcdh7	protocadherin 7	protein coding gene	5	+	57875309	58290572	54216
ENSMUSG00000029131	Ensembl Gene Model	MGI:1344381	Dnajb6	DnaJ heat shock protein family (Hsp40) member B6	protein coding gene	5	+	29940896	29991476	23950
ENSMUSG00000029169	Ensembl Gene Model	MGI:1099786	Dhx15	DEAH (Asp-Glu-Ala-His) box polypeptide 15	protein coding gene	5	-	52307545	52347856	13204
ENSMUSG00000029176	Ensembl Gene Model	MGI:1098673	Anapc4	anaphase promoting complex subunit 4	protein coding gene	5	+	52991477	53024076	52206
ENSMUSG00000029177	Ensembl Gene Model	MGI:88375	Cenpa	centromere protein A	protein coding gene	5	+	30824214	30832181	12615
ENSMUSG00000029186	Ensembl Gene Model	MGI:1914323	Pi4k2b	phosphatidylinositol 4-kinase type 2 beta	protein coding gene	5	+	52898916	52926682	67073
ENSMUSG00000029190	Ensembl Gene Model	MGI:1261849	D5Ertd579e	DNA segment, Chr 5, ERATO Doi 579, expressed	protein coding gene	5	-	36757829	36853368	320661
ENSMUSG00000029203	Ensembl Gene Model	MGI:1858216	Ube2k	ubiquitin-conjugating enzyme E2K	protein coding gene	5	+	65694588	65756332	53323
ENSMUSG00000029221	Ensembl Gene Model	MGI:1923690	Slc30a9	solute carrier family 30 (zinc transporter), member 9	protein coding gene	5	+	67464298	67513485	109108
ENSMUSG00000029229	Ensembl Gene Model	MGI:1921527	Chic2	cysteine-rich hydrophobic domain 2	protein coding gene	5	-	75165665	75205302	74277
ENSMUSG00000029231	Ensembl Gene Model	MGI:97530	Pdgfra	platelet derived growth factor receptor, alpha polypeptide	protein coding gene	5	+	75312953	75358876	18595
ENSMUSG00000029245	Ensembl Gene Model	MGI:99654	Epha5	Eph receptor A5	protein coding gene	5	-	84202620	84565241	13839
ENSMUSG00000029265	Ensembl Gene Model	MGI:1100515	Dr1	down-regulator of transcription 1	protein coding gene	5	+	108416763	108428387	13486
ENSMUSG00000029267	Ensembl Gene Model	MGI:105050	Mtf2	metal response element binding transcription factor 2	protein coding gene	5	+	108213540	108256870	17765
ENSMUSG00000029381	Ensembl Gene Model	MGI:1351655	Shroom3	shroom family member 3	protein coding gene	5	+	92831294	93113177	27428
ENSMUSG00000029389	Ensembl Gene Model	MGI:1915098	Ddx55	DEAD box helicase 55	protein coding gene	5	+	124690927	124707723	67848
ENSMUSG00000029390	Ensembl Gene Model	MGI:1929269	Tmed2	transmembrane p24 trafficking protein 2	protein coding gene	5	+	124678758	124688569	56334
ENSMUSG00000029415	Ensembl Gene Model	MGI:2140779	Sdad1	SDA1 domain containing 1	protein coding gene	5	-	92431869	92457883	231452
ENSMUSG00000029432	Ensembl Gene Model	MGI:1278343	Nipsnap2	nipsnap homolog 2	protein coding gene	5	+	129802127	129835391	14467
ENSMUSG00000029467	Ensembl Gene Model	MGI:88110	Atp2a2	ATPase, Ca++ transporting, cardiac muscle, slow twitch 2	protein coding gene	5	-	122591576	122640288	11938
ENSMUSG00000029480	Ensembl Gene Model	MGI:3028576	Dhx37	DEAH (Asp-Glu-Ala-His) box polypeptide 37	protein coding gene	5	-	125490922	125511185	208144
ENSMUSG00000029504	Ensembl Gene Model	MGI:1916913	Ddx51	DEAD box helicase 51	protein coding gene	5	+	110801317	110808362	69663
ENSMUSG00000029613	Ensembl Gene Model	MGI:1353448	Eif2ak1	eukaryotic translation initiation factor 2 alpha kinase 1	protein coding gene	5	+	143803530	143839535	15467
ENSMUSG00000029614	Ensembl Gene Model	MGI:108057	Rpl6	ribosomal protein L6	protein coding gene	5	+	121342564	121347304	19988
ENSMUSG00000029629	Ensembl Gene Model	MGI:1923539	Phf14	PHD finger protein 14	protein coding gene	6	+	11907808	12081204	75725
ENSMUSG00000029634	Ensembl Gene Model	MGI:1921382	Rnf6	ring finger protein (C3H2C3 type) 6	protein coding gene	5	-	146146003	146158267	74132
ENSMUSG00000029647	Ensembl Gene Model	MGI:1919837	Pan3	PAN3 poly(A) specific ribonuclease subunit	protein coding gene	5	+	147366971	147485312	72587
ENSMUSG00000029655	Ensembl Gene Model	MGI:2687207	N4bp2l2	NEDD4 binding protein 2-like 2	protein coding gene	5	-	150531472	150589648	381695
ENSMUSG00000029670	Ensembl Gene Model	MGI:1919027	Ing3	inhibitor of growth family, member 3	protein coding gene	6	+	21949570	21976037	71777
ENSMUSG00000029672	Ensembl Gene Model	MGI:107892	Fam3c	FAM3 metabolism regulating signaling molecule C	protein coding gene	6	-	22306519	22356080	27999
ENSMUSG00000029712	Ensembl Gene Model	MGI:1933548	Actl6b	actin-like 6B	protein coding gene	5	+	137551779	137567844	83766
ENSMUSG00000029730	Ensembl Gene Model	MGI:1298398	Mcm7	minichromosome maintenance complex component 7	protein coding gene	5	-	138162845	138170675	17220
ENSMUSG00000029757	Ensembl Gene Model	MGI:107743	Dync1i1	dynein cytoplasmic 1 intermediate chain 1	protein coding gene	6	+	5725639	6028039	13426
ENSMUSG00000029787	Ensembl Gene Model	MGI:1926187	Avl9	AVL9 cell migration associated	protein coding gene	6	+	56691884	56738897	78937
ENSMUSG00000029802	Ensembl Gene Model	MGI:1347061	Abcg2	ATP binding cassette subfamily G member 2 (Junior blood group)	protein coding gene	6	+	58561476	58669436	26357
ENSMUSG00000029817	Ensembl Gene Model	MGI:1933972	Tra2a	transformer 2 alpha	protein coding gene	6	-	49220858	49240967	101214
ENSMUSG00000029823	Ensembl Gene Model	MGI:2183260	Luc7l2	LUC7-like 2 (S. cerevisiae)	protein coding gene	6	+	38528269	38586405	192196
ENSMUSG00000029863	Ensembl Gene Model	MGI:97295	Casp2	caspase 2	protein coding gene	6	+	42241919	42259442	12366
ENSMUSG00000029868	Ensembl Gene Model	MGI:1927259	Trpv6	transient receptor potential cation channel, subfamily V, member 6	protein coding gene	6	-	41597558	41613339	64177
ENSMUSG00000029910	Ensembl Gene Model	MGI:1860374	Mad2l1	MAD2 mitotic arrest deficient-like 1	protein coding gene	6	+	66512205	66518091	56150
ENSMUSG00000029920	Ensembl Gene Model	MGI:95453	Smarcad1	SWI/SNF-related, matrix-associated actin-dependent regulator of chromatin, subfamily a, containing DEAD/H box 1	protein coding gene	6	+	65019575	65093045	13990
ENSMUSG00000029924	Ensembl Gene Model	MGI:1919394	Slc37a3	solute carrier family 37 (glycerol-3-phosphate transporter), member 3	protein coding gene	6	-	39311707	39354609	72144
ENSMUSG00000030031	Ensembl Gene Model	MGI:2661430	Kbtbd8	kelch repeat and BTB (POZ) domain containing 8	protein coding gene	6	+	95094861	95106774	243574
ENSMUSG00000030092	Ensembl Gene Model	MGI:1858223	Cntn6	contactin 6	protein coding gene	6	+	104469751	104840367	53870
ENSMUSG00000030101	Ensembl Gene Model	MGI:1889844	Sumf1	sulfatase modifying factor 1	protein coding gene	6	-	108083989	108162543	58911
ENSMUSG00000030111	Ensembl Gene Model	MGI:2449119	A2m	alpha-2-macroglobulin	protein coding gene	6	+	121612920	121656197	232345
ENSMUSG00000030138	Ensembl Gene Model	MGI:2446132	Bms1	BMS1, ribosome biogenesis factor	protein coding gene	6	-	118360342	118396435	213895
ENSMUSG00000030145	Ensembl Gene Model	MGI:1919970	Zfp248	zinc finger protein 248	protein coding gene	6	-	118404280	118432489	72720
ENSMUSG00000030172	Ensembl Gene Model	MGI:2151013	Erc1	ELKS/RAB6-interacting/CAST family member 1	protein coding gene	6	-	119547757	119825128	111173
ENSMUSG00000030180	Ensembl Gene Model	MGI:2136980	Kdm5a	lysine (K)-specific demethylase 5A	protein coding gene	6	+	120341085	120421535	214899
ENSMUSG00000030254	Ensembl Gene Model	MGI:1890476	Rad18	RAD18 E3 ubiquitin protein ligase	protein coding gene	6	-	112596811	112673647	58186
ENSMUSG00000030269	Ensembl Gene Model	MGI:1916075	Mtmr14	myotubularin related protein 14	protein coding gene	6	+	113214804	113258353	97287
ENSMUSG00000030309	Ensembl Gene Model	MGI:2448541	Caprin2	caprin family member 2	protein coding gene	6	-	148743990	148797735	232560
ENSMUSG00000030421	Ensembl Gene Model	MGI:1342294	Uri1	URI1, prefoldin-like chaperone	protein coding gene	7	-	37659417	37722976	19777
ENSMUSG00000030465	Ensembl Gene Model	MGI:1918215	Psd3	pleckstrin and Sec7 domain containing 3	protein coding gene	8	-	68141734	68664679	234353
ENSMUSG00000030500	Ensembl Gene Model	MGI:2156052	Slc17a6	solute carrier family 17 (sodium-dependent inorganic phosphate cotransporter), member 6	protein coding gene	7	+	51271754	51320867	140919
ENSMUSG00000030509	Ensembl Gene Model	MGI:2152835	Asb7	ankyrin repeat and SOCS box-containing 7	protein coding gene	7	-	66294313	66339344	117589
ENSMUSG00000030516	Ensembl Gene Model	MGI:98759	Tjp1	tight junction protein 1	protein coding gene	7	-	64945913	65177529	21872
ENSMUSG00000030528	Ensembl Gene Model	MGI:1328362	Blm	Bloom syndrome, RecQ like helicase	protein coding gene	7	-	80104741	80184896	12144
ENSMUSG00000030536	Ensembl Gene Model	MGI:1352757	Iqgap1	IQ motif containing GTPase activating protein 1	protein coding gene	7	-	80361331	80453288	29875
ENSMUSG00000030592	Ensembl Gene Model	MGI:99659	Ryr1	ryanodine receptor 1, skeletal muscle	protein coding gene	7	-	28702765	28824599	20190
ENSMUSG00000030604	Ensembl Gene Model	MGI:1918413	Zfp626	zinc finger protein 626	protein coding gene	7	+	27506621	27522341	71163
ENSMUSG00000030654	Ensembl Gene Model	MGI:1858943	Arl6ip1	ADP-ribosylation factor-like 6 interacting protein 1	protein coding gene	7	-	117718113	117728848	54208
ENSMUSG00000030657	Ensembl Gene Model	MGI:2451073	Xylt1	xylosyltransferase 1	protein coding gene	7	+	116980214	117266853	233781
ENSMUSG00000030671	Ensembl Gene Model	MGI:1333863	Pde3b	phosphodiesterase 3B, cGMP-inhibited	protein coding gene	7	+	114014388	114137173	18576
ENSMUSG00000030674	Ensembl Gene Model	MGI:1914625	Qprt	quinolinate phosphoribosyltransferase	protein coding gene	7	-	126706942	126721201	67375
ENSMUSG00000030677	Ensembl Gene Model	MGI:109233	Kif22	kinesin family member 22	protein coding gene	7	-	126626901	126641639	110033
ENSMUSG00000030779	Ensembl Gene Model	MGI:894835	Rbbp6	retinoblastoma binding protein 6, ubiquitin ligase	protein coding gene	7	+	122568980	122601795	19647
ENSMUSG00000030790	Ensembl Gene Model	MGI:108058	Adm	adrenomedullin	protein coding gene	7	+	110226868	110229027	11535
ENSMUSG00000030861	Ensembl Gene Model	MGI:1914135	Acadsb	acyl-Coenzyme A dehydrogenase, short/branched chain	protein coding gene	7	+	131012330	131047940	66885
ENSMUSG00000030862	Ensembl Gene Model	MGI:1926006	Cpxm2	carboxypeptidase X 2 (M14 family)	protein coding gene	7	-	131634416	131756468	55987
ENSMUSG00000030870	Ensembl Gene Model	MGI:107301	Ubfd1	ubiquitin family domain containing 1	protein coding gene	7	+	121666398	121681417	28018
ENSMUSG00000030978	Ensembl Gene Model	MGI:98180	Rrm1	ribonucleotide reductase M1	protein coding gene	7	+	102090902	102118978	20133
ENSMUSG00000030980	Ensembl Gene Model	MGI:1913606	Knop1	lysine rich nucleolar protein 1	protein coding gene	7	-	118441440	118455221	66356
ENSMUSG00000031004	Ensembl Gene Model	MGI:106035	Mki67	antigen identified by monoclonal antibody Ki 67	protein coding gene	7	-	135291513	135318090	17345
ENSMUSG00000031027	Ensembl Gene Model	MGI:2152419	Stk33	serine/threonine kinase 33	protein coding gene	7	-	108878430	109038288	117229
ENSMUSG00000031095	Ensembl Gene Model	MGI:1919834	Cul4b	cullin 4B	protein coding gene	X	-	37622151	37665073	72584
ENSMUSG00000031137	Ensembl Gene Model	MGI:109178	Fgf13	fibroblast growth factor 13	protein coding gene	X	-	58107505	58613431	14168
ENSMUSG00000031143	Ensembl Gene Model	MGI:1859608	Ccdc22	coiled-coil domain containing 22	protein coding gene	X	-	7460048	7471659	54638
ENSMUSG00000031167	Ensembl Gene Model	MGI:1099460	Rbm3	RNA binding motif (RNP1, RRM) protein 3	protein coding gene	X	-	8005214	8012119	19652
ENSMUSG00000031292	Ensembl Gene Model	MGI:1278336	Cdkl5	cyclin-dependent kinase-like 5	protein coding gene	X	-	159567304	159777677	382253
ENSMUSG00000031314	Ensembl Gene Model	MGI:1336878	Taf1	TATA-box binding protein associated factor 1	protein coding gene	X	+	100576340	100645395	270627
ENSMUSG00000031347	Ensembl Gene Model	MGI:1347085	Cetn2	centrin 2	protein coding gene	X	-	71957171	71961950	26370
ENSMUSG00000031357	Ensembl Gene Model	MGI:1914293	Syap1	synapse associated protein 1	protein coding gene	X	-	161640053	161671443	67043
ENSMUSG00000031378	Ensembl Gene Model	MGI:1349215	Abcd1	ATP-binding cassette, sub-family D (ALD), member 1	protein coding gene	X	+	72760203	72782140	11666
ENSMUSG00000031393	Ensembl Gene Model	MGI:99918	Mecp2	methyl CpG binding protein 2	protein coding gene	X	-	73070198	73129296	17257
ENSMUSG00000031422	Ensembl Gene Model	MGI:1927167	Morf4l2	mortality factor 4 like 2	protein coding gene	X	-	135633691	135644435	56397
ENSMUSG00000031503	Ensembl Gene Model	MGI:88455	Col4a2	collagen, type IV, alpha 2	protein coding gene	8	+	11362805	11499287	12827
ENSMUSG00000031511	Ensembl Gene Model	MGI:1860493	Arhgef7	Rho guanine nucleotide exchange factor (GEF7)	protein coding gene	8	+	11778053	11885219	54126
ENSMUSG00000031538	Ensembl Gene Model	MGI:97610	Plat	plasminogen activator, tissue	protein coding gene	8	+	23247743	23272860	18791
ENSMUSG00000031555	Ensembl Gene Model	MGI:105376	Adam9	a disintegrin and metallopeptidase domain 9 (meltrin gamma)	protein coding gene	8	-	25439627	25506943	11502
ENSMUSG00000031563	Ensembl Gene Model	MGI:1261872	Wwc2	WW, C2 and coiled-coil domain containing 2	protein coding gene	8	-	48279117	48443579	52357
ENSMUSG00000031568	Ensembl Gene Model	MGI:2681000	Rwdd4a	RWD domain containing 4A	protein coding gene	8	+	47986680	48005872	192174
ENSMUSG00000031592	Ensembl Gene Model	MGI:1277958	Pcm1	pericentriolar material 1	protein coding gene	8	+	41692789	41785381	18536
ENSMUSG00000031605	Ensembl Gene Model	MGI:1924363	Klhl2	kelch-like 2, Mayven	protein coding gene	8	-	65192709	65302669	77113
ENSMUSG00000031631	Ensembl Gene Model	MGI:1914006	Cfap97	cilia and flagella associated protein 97	protein coding gene	8	+	46615515	46648627	66756
ENSMUSG00000031652	Ensembl Gene Model	MGI:2136825	N4bp1	NEDD4 binding protein 1	protein coding gene	8	-	87567764	87612489	80750
ENSMUSG00000031657	Ensembl Gene Model	MGI:2444491	Heatr3	HEAT repeat containing 3	protein coding gene	8	+	88864483	88898655	234549
ENSMUSG00000031673	Ensembl Gene Model	MGI:99217	Cdh11	cadherin 11	protein coding gene	8	-	103358727	103512125	12552
ENSMUSG00000031696	Ensembl Gene Model	MGI:1890467	Vps35	VPS35 retromer complex component	protein coding gene	8	-	85987014	86026146	65114
ENSMUSG00000031706	Ensembl Gene Model	MGI:105982	Rfx1	regulatory factor X, 1 (influences HLA class II expression)	protein coding gene	8	+	84793463	84823621	19724
ENSMUSG00000031709	Ensembl Gene Model	MGI:1918560	Tbc1d9	TBC1 domain family, member 9	protein coding gene	8	+	83891981	83999563	71310
ENSMUSG00000031731	Ensembl Gene Model	MGI:101919	Ap1g1	adaptor protein complex AP-1, gamma 1 subunit	protein coding gene	8	+	110505215	110590842	11765
ENSMUSG00000031819	Ensembl Gene Model	MGI:1343095	Emc8	ER membrane protein complex subunit 8	protein coding gene	8	-	121380653	121394826	18117
ENSMUSG00000031823	Ensembl Gene Model	MGI:2142662	Zdhhc7	zinc finger, DHHC domain containing 7	protein coding gene	8	-	120807834	120828211	102193
ENSMUSG00000031870	Ensembl Gene Model	MGI:97567	Pgr	progesterone receptor	protein coding gene	9	+	8899834	8968612	18667
ENSMUSG00000031935	Ensembl Gene Model	MGI:2182585	Med17	mediator complex subunit 17	protein coding gene	9	-	15171647	15191227	234959
ENSMUSG00000031967	Ensembl Gene Model	MGI:1928277	Afg3l1	AFG3-like AAA ATPase 1	protein coding gene	8	+	124204642	124230655	114896
ENSMUSG00000031986	Ensembl Gene Model	MGI:2685351	Sprtn	SprT-like N-terminal domain	protein coding gene	8	+	125624625	125632900	244666
ENSMUSG00000032018	Ensembl Gene Model	MGI:1353611	Sc5d	sterol-C5-desaturase	protein coding gene	9	-	42162891	42175552	235293
ENSMUSG00000032085	Ensembl Gene Model	MGI:106012	Tagln	transgelin	protein coding gene	9	-	45840926	45847356	21345
ENSMUSG00000032096	Ensembl Gene Model	MGI:2387591	Arcn1	archain 1	protein coding gene	9	-	44653440	44679105	213827
ENSMUSG00000032181	Ensembl Gene Model	MGI:103032	Scg3	secretogranin III	protein coding gene	9	-	75550471	75591338	20255
ENSMUSG00000032193	Ensembl Gene Model	MGI:96765	Ldlr	low density lipoprotein receptor	protein coding gene	9	+	21634872	21661215	16835
ENSMUSG00000032199	Ensembl Gene Model	MGI:107282	Polr2m	polymerase (RNA) II (DNA directed) polypeptide M	protein coding gene	9	-	71385719	71393217	28015
ENSMUSG00000032220	Ensembl Gene Model	MGI:106621	Myo1e	myosin IE	protein coding gene	9	+	70114632	70307048	71602
ENSMUSG00000032350	Ensembl Gene Model	MGI:104990	Gclc	glutamate-cysteine ligase, catalytic subunit	protein coding gene	9	+	77661817	77701767	14629
ENSMUSG00000032359	Ensembl Gene Model	MGI:107285	Ctsh	cathepsin H	protein coding gene	9	+	89936320	89958148	13036
ENSMUSG00000032400	Ensembl Gene Model	MGI:1915264	Zwilch	zwilch kinetochore protein	protein coding gene	9	-	64044426	64080213	68014
ENSMUSG00000032409	Ensembl Gene Model	MGI:108028	Atr	ataxia telangiectasia and Rad3 related	protein coding gene	9	+	95739650	95833834	245000
ENSMUSG00000032434	Ensembl Gene Model	MGI:2447165	Cmtm6	CKLF-like MARVEL transmembrane domain containing 6	protein coding gene	9	+	114560230	114578415	67213
ENSMUSG00000032469	Ensembl Gene Model	MGI:1931520	Dbr1	debranching RNA lariats 1	protein coding gene	9	+	99457852	99466554	83703
ENSMUSG00000032481	Ensembl Gene Model	MGI:1203524	Smarcc1	SWI/SNF related, matrix associated, actin dependent regulator of chromatin, subfamily c, member 1	protein coding gene	9	+	109961092	110069246	20588
ENSMUSG00000032503	Ensembl Gene Model	MGI:107562	Arpp21	cyclic AMP-regulated phosphoprotein, 21	protein coding gene	9	-	111894159	112065006	74100
ENSMUSG00000032537	Ensembl Gene Model	MGI:1096337	Ephb1	Eph receptor B1	protein coding gene	9	-	101799327	102231892	270190
ENSMUSG00000032547	Ensembl Gene Model	MGI:101766	Ryk	receptor-like tyrosine kinase	protein coding gene	9	+	102712119	102785506	20187
ENSMUSG00000032551	Ensembl Gene Model	MGI:1913452	1110059G10Rik	RIKEN cDNA 1110059G10 gene	protein coding gene	9	-	122774154	122780065	66202
ENSMUSG00000032555	Ensembl Gene Model	MGI:1920018	Topbp1	topoisomerase (DNA) II binding protein 1	protein coding gene	9	+	103182414	103227627	235559
ENSMUSG00000032570	Ensembl Gene Model	MGI:1889008	Atp2c1	ATPase, Ca++-sequestering	protein coding gene	9	-	105288561	105398456	235574
ENSMUSG00000032582	Ensembl Gene Model	MGI:1338037	Rbm6	RNA binding motif protein 6	protein coding gene	9	-	107650758	107750436	19654
ENSMUSG00000032593	Ensembl Gene Model	MGI:2444854	Amigo3	adhesion molecule with Ig like domain 3	protein coding gene	9	+	107930358	107932900	320844
ENSMUSG00000032594	Ensembl Gene Model	MGI:1351633	Ip6k1	inositol hexaphosphate kinase 1	protein coding gene	9	+	107879847	107925981	27399
ENSMUSG00000032601	Ensembl Gene Model	MGI:108025	Prkar2a	protein kinase, cAMP dependent regulatory, type II alpha	protein coding gene	9	+	108569342	108627643	19087
ENSMUSG00000032640	Ensembl Gene Model	MGI:2681120	Chsy1	chondroitin sulfate synthase 1	protein coding gene	7	+	65759263	65823546	269941
ENSMUSG00000032652	Ensembl Gene Model	MGI:1889385	Crebl2	cAMP responsive element binding protein-like 2	protein coding gene	6	+	134807117	134835894	232430
ENSMUSG00000032712	Ensembl Gene Model	MGI:1914496	Resf1	retroelement silencing factor 1	protein coding gene	6	+	149210912	149237161	67246
ENSMUSG00000032841	Ensembl Gene Model	MGI:1919696	Prr5l	proline rich 5 like	protein coding gene	2	-	101544630	101713372	72446
ENSMUSG00000032878	Ensembl Gene Model	MGI:2445069	Ccdc85a	coiled-coil domain containing 85A	protein coding gene	11	-	28335685	28534324	216613
ENSMUSG00000032897	Ensembl Gene Model	MGI:107901	Nfyc	nuclear transcription factor-Y gamma	protein coding gene	4	-	120614635	120688769	18046
ENSMUSG00000032913	Ensembl Gene Model	MGI:2443718	Lrig2	leucine-rich repeats and immunoglobulin-like domains 2	protein coding gene	3	-	104361296	104419251	269473
ENSMUSG00000032939	Ensembl Gene Model	MGI:1919055	Nup93	nucleoporin 93	protein coding gene	8	+	94941192	95043855	71805
ENSMUSG00000032988	Ensembl Gene Model	MGI:1929519	Slc16a8	solute carrier family 16 (monocarboxylic acid transporters), member 8	protein coding gene	15	-	79135214	79138961	57274
ENSMUSG00000033031	Ensembl Gene Model	MGI:2146335	Cip2a	cell proliferation regulating inhibitor of protein phosphatase 2A	protein coding gene	16	+	48814548	48840072	224171
ENSMUSG00000033411	Ensembl Gene Model	MGI:1196405	Ctdspl2	CTD (carboxy-terminal domain, RNA polymerase II, polypeptide A) small phosphatase like 2	protein coding gene	2	+	121786482	121844123	329506
ENSMUSG00000033417	Ensembl Gene Model	MGI:1926082	Cacul1	CDK2 associated, cullin domain 1	protein coding gene	19	-	60513134	60569461	78832
ENSMUSG00000033585	Ensembl Gene Model	MGI:97290	Ndn	necdin, MAGE family member	protein coding gene	7	+	61998025	61999676	17984
ENSMUSG00000033596	Ensembl Gene Model	MGI:2384584	Rfwd3	ring finger and WD repeat domain 3	protein coding gene	8	-	111997576	112026854	234736
ENSMUSG00000033618	Ensembl Gene Model	MGI:2444243	Map3k13	mitogen-activated protein kinase kinase kinase 13	protein coding gene	16	+	21643923	21752189	71751
ENSMUSG00000033658	Ensembl Gene Model	MGI:2148251	Ddx19b	DEAD box helicase 19b	protein coding gene	8	-	111729820	111758383	234733
ENSMUSG00000033705	Ensembl Gene Model	MGI:3045258	Stard9	START domain containing 9	protein coding gene	2	+	120459602	120562376	668880
ENSMUSG00000033721	Ensembl Gene Model	MGI:1888518	Vav3	vav 3 oncogene	protein coding gene	3	+	109247969	109593014	57257
ENSMUSG00000033732	Ensembl Gene Model	MGI:1289341	Sf3b3	splicing factor 3b, subunit 3	protein coding gene	8	-	111537123	111573578	101943
ENSMUSG00000033792	Ensembl Gene Model	MGI:99400	Atp7a	ATPase, Cu++ transporting, alpha polypeptide	protein coding gene	X	+	105070882	105168532	11977
ENSMUSG00000033849	Ensembl Gene Model	MGI:1349461	B3galt2	UDP-Gal:betaGlcNAc beta 1,3-galactosyltransferase, polypeptide 2	protein coding gene	1	+	143516435	143525675	26878
ENSMUSG00000033931	Ensembl Gene Model	MGI:1098653	Rbm34	RNA binding motif protein 34	protein coding gene	8	-	127673922	127697799	52202
ENSMUSG00000033952	Ensembl Gene Model	MGI:1334448	Aspm	abnormal spindle microtubule assembly	protein coding gene	1	+	139382510	139421829	12316
ENSMUSG00000033960	Ensembl Gene Model	MGI:2685174	Jcad	junctional cadherin 5 associated	protein coding gene	18	+	4634878	4682869	240185
ENSMUSG00000033966	Ensembl Gene Model	MGI:3587025	Cdkl4	cyclin-dependent kinase-like 4	protein coding gene	17	-	80830979	80885242	381113
ENSMUSG00000034042	Ensembl Gene Model	MGI:1924360	Gpbp1l1	GC-rich promoter binding protein 1-like 1	protein coding gene	4	+	116414855	116451079	77110
ENSMUSG00000034071	Ensembl Gene Model	MGI:3588205	Zfp551	zinc fingr protein 551	protein coding gene	7	-	12149080	12156678	619331
ENSMUSG00000034163	Ensembl Gene Model	MGI:2446143	Zfc3h1	zinc finger, C3H1-type containing	protein coding gene	10	+	115220864	115268677	216345
ENSMUSG00000034206	Ensembl Gene Model	MGI:2155399	Polq	polymerase (DNA directed), theta	protein coding gene	16	+	36832148	36915779	77782
ENSMUSG00000034282	Ensembl Gene Model	MGI:107507	Evpl	envoplakin	protein coding gene	11	-	116111385	116128903	14027
ENSMUSG00000034300	Ensembl Gene Model	MGI:1913556	Fam53c	family with sequence similarity 53, member C	protein coding gene	18	+	34891959	34906813	66306
ENSMUSG00000034310	Ensembl Gene Model	MGI:3044963	Tmem132d	transmembrane protein 132D	protein coding gene	5	-	127860555	128510141	243274
ENSMUSG00000034311	Ensembl Gene Model	MGI:108389	Kif4	kinesin family member 4	protein coding gene	X	+	99669671	99770877	16571
ENSMUSG00000034333	Ensembl Gene Model	MGI:2682302	Zbed4	zinc finger, BED type containing 4	protein coding gene	15	+	88635863	88668719	223773
ENSMUSG00000034349	Ensembl Gene Model	MGI:1917349	Smc4	structural maintenance of chromosomes 4	protein coding gene	3	+	68912071	68941956	70099
ENSMUSG00000034430	Ensembl Gene Model	MGI:1933108	Zxdc	ZXD family zinc finger C	protein coding gene	6	+	90346474	90380472	80292
ENSMUSG00000034501	Ensembl Gene Model	MGI:1914958	Pcnx4	pecanex homolog 4	protein coding gene	12	+	72583157	72626893	67708
ENSMUSG00000034538	Ensembl Gene Model	MGI:2444763	Zfp418	zinc finger protein 418	protein coding gene	7	+	7174352	7186559	232854
ENSMUSG00000034543	Ensembl Gene Model	MGI:1921772	Morc2a	microrchidia 2A	protein coding gene	11	+	3599191	3640477	74522
ENSMUSG00000034560	Ensembl Gene Model	MGI:2441787	Washc4	WASH complex subunit 4	protein coding gene	10	+	83379616	83432337	319277
ENSMUSG00000034563	Ensembl Gene Model	MGI:1196419	Ccpg1	cell cycle progression 1	protein coding gene	9	+	72892711	72923622	72278
ENSMUSG00000034621	Ensembl Gene Model	MGI:1918667	Gpatch8	G patch domain containing 8	protein coding gene	11	-	102366741	102447218	237943
ENSMUSG00000034732	Ensembl Gene Model	MGI:2136401	Pabpc5	poly(A) binding protein, cytoplasmic 5	protein coding gene	X	+	118836893	118839862	93728
ENSMUSG00000034810	Ensembl Gene Model	MGI:102965	Scn7a	sodium channel, voltage-gated, type VII, alpha	protein coding gene	2	-	66503770	66615254	20272
ENSMUSG00000034820	Ensembl Gene Model	MGI:1917826	Cpsf7	cleavage and polyadenylation specific factor 7	protein coding gene	19	+	10502630	10525017	269061
ENSMUSG00000034826	Ensembl Gene Model	MGI:1920460	Nup54	nucleoporin 54	protein coding gene	5	-	92563399	92583078	269113
ENSMUSG00000034928	Ensembl Gene Model	MGI:2145310	Rnf44	ring finger protein 44	protein coding gene	13	-	54827212	54841720	105239
ENSMUSG00000034931	Ensembl Gene Model	MGI:1306823	Dhx8	DEAH (Asp-Glu-Ala-His) box polypeptide 8	protein coding gene	11	+	101623782	101658184	217207
ENSMUSG00000034981	Ensembl Gene Model	MGI:2443349	Parm1	prostate androgen-regulated mucin-like protein 1	protein coding gene	5	+	91665559	91771870	231440
ENSMUSG00000035011	Ensembl Gene Model	MGI:1335091	Zbtb7a	zinc finger and BTB domain containing 7a	protein coding gene	10	+	80970416	80988056	16969
ENSMUSG00000035024	Ensembl Gene Model	MGI:2142989	Ncapd3	non-SMC condensin II complex, subunit D3	protein coding gene	9	+	26941471	27006611	78658
ENSMUSG00000035067	Ensembl Gene Model	MGI:2447765	Xkr6	X-linked Kx blood group related 6	protein coding gene	14	+	63843952	64058258	219149
ENSMUSG00000035086	Ensembl Gene Model	MGI:1891828	Becn1	beclin 1, autophagy related	protein coding gene	11	-	101179084	101193112	56208
ENSMUSG00000035109	Ensembl Gene Model	MGI:2655364	Shc4	SHC (Src homology 2 domain containing) family, member 4	protein coding gene	2	-	125469367	125566068	271849
ENSMUSG00000035131	Ensembl Gene Model	MGI:2443035	Brinp3	bone morphogenetic protein/retinoic acid inducible neural specific 3	protein coding gene	1	+	146371367	146778210	215378
ENSMUSG00000035236	Ensembl Gene Model	MGI:2443716	Scai	suppressor of cancer cell invasion	protein coding gene	2	-	38956226	39080746	320271
ENSMUSG00000035270	Ensembl Gene Model	MGI:3044955	Impg2	interphotoreceptor matrix proteoglycan 2	protein coding gene	16	+	56024676	56094119	224224
ENSMUSG00000035293	Ensembl Gene Model	MGI:2444298	G2e3	G2/M-phase specific E3 ubiquitin ligase	protein coding gene	12	+	51395013	51423769	217558
ENSMUSG00000035365	Ensembl Gene Model	MGI:1922567	Parpbp	PARP1 binding protein	protein coding gene	10	-	87927294	87982803	75317
ENSMUSG00000035437	Ensembl Gene Model	MGI:2385139	Rabgap1	RAB GTPase activating protein 1	protein coding gene	2	+	37333291	37456466	227800
ENSMUSG00000035455	Ensembl Gene Model	MGI:1890648	Fignl1	fidgetin-like 1	protein coding gene	11	-	11750288	11758983	60530
ENSMUSG00000035498	Ensembl Gene Model	MGI:2442010	Cdcp1	CUB domain containing protein 1	protein coding gene	9	-	122999889	123045103	109332
ENSMUSG00000035569	Ensembl Gene Model	MGI:1924337	Ankrd11	ankyrin repeat domain 11	protein coding gene	8	-	123610561	123769016	77087
ENSMUSG00000035597	Ensembl Gene Model	MGI:104602	Prpf39	pre-mRNA processing factor 39	protein coding gene	12	+	65083107	65110160	328110
ENSMUSG00000035601	Ensembl Gene Model	MGI:1917184	Trmt10b	tRNA methyltransferase 10B	protein coding gene	4	+	45297127	45316131	69934
ENSMUSG00000035620	Ensembl Gene Model	MGI:2682307	Ric8b	RIC8 guanine nucleotide exchange factor B	protein coding gene	10	+	84753480	84854201	237422
ENSMUSG00000035671	Ensembl Gene Model	MGI:2443726	Zswim4	zinc finger SWIM-type containing 4	protein coding gene	8	-	84937571	84963671	212168
ENSMUSG00000035673	Ensembl Gene Model	MGI:2448490	Sbno2	strawberry notch 2	protein coding gene	10	-	79892826	79941405	216161
ENSMUSG00000035725	Ensembl Gene Model	MGI:1309999	Prkx	protein kinase, X-linked	protein coding gene	X	-	76805017	76839884	19108
ENSMUSG00000035834	Ensembl Gene Model	MGI:1914736	Polr3g	polymerase (RNA) III (DNA directed) polypeptide G	protein coding gene	13	-	81821962	81859132	67486
ENSMUSG00000035840	Ensembl Gene Model	MGI:1915906	Lysmd3	LysM, putative peptidoglycan-binding, domain containing 3	protein coding gene	13	+	81805782	81820990	80289
ENSMUSG00000035852	Ensembl Gene Model	MGI:1926156	Misp	mitotic spindle positioning	protein coding gene	10	+	79656853	79666286	78906
ENSMUSG00000035992	Ensembl Gene Model	MGI:2444668	Fnip1	folliculin interacting protein 1	protein coding gene	11	+	54329025	54409061	216742
ENSMUSG00000036019	Ensembl Gene Model	MGI:1914057	Tmtc2	transmembrane and tetratricopeptide repeat containing 2	protein coding gene	10	-	105023524	105410312	278279
ENSMUSG00000036030	Ensembl Gene Model	MGI:2444710	Prtg	protogenin	protein coding gene	9	+	72714556	72824589	235472
ENSMUSG00000036046	Ensembl Gene Model	MGI:2444899	5031439G07Rik	RIKEN cDNA 5031439G07 gene	protein coding gene	15	-	84828137	84872503	223739
ENSMUSG00000036054	Ensembl Gene Model	MGI:2678085	Sugp2	SURP and G patch domain containing 2	protein coding gene	8	+	70686838	70715755	234373
ENSMUSG00000036097	Ensembl Gene Model	MGI:1924968	Slf2	SMC5-SMC6 complex localization factor 2	protein coding gene	19	+	44919590	44971738	226151
ENSMUSG00000036099	Ensembl Gene Model	MGI:2143698	Vezt	vezatin, adherens junctions transmembrane protein	protein coding gene	10	-	93797384	93871661	215008
ENSMUSG00000036181	Ensembl Gene Model	MGI:1931526	H1f2	H1.2 linker histone, cluster member	protein coding gene	13	+	23922790	23923514	50708
ENSMUSG00000036197	Ensembl Gene Model	MGI:2684933	Gxylt1	glucoside xylosyltransferase 1	protein coding gene	15	-	93137623	93173060	223827
ENSMUSG00000036223	Ensembl Gene Model	MGI:1913718	Ska1	spindle and kinetochore associated complex subunit 1	protein coding gene	18	-	74328370	74340889	66468
ENSMUSG00000036309	Ensembl Gene Model	MGI:103575	Skp1	S-phase kinase-associated protein 1	protein coding gene	11	+	52122822	52137685	21402
ENSMUSG00000036376	Ensembl Gene Model	MGI:1353636	Abt1	activator of basal transcription 1	protein coding gene	13	-	23602531	23608036	30946
ENSMUSG00000036403	Ensembl Gene Model	MGI:2681869	Cep135	centrosomal protein 135	protein coding gene	5	+	76736545	76794313	381644
ENSMUSG00000036437	Ensembl Gene Model	MGI:104963	Npy1r	neuropeptide Y receptor Y1	protein coding gene	8	+	67149844	67159444	18166
ENSMUSG00000036473	Ensembl Gene Model	MGI:2443456	Tbc1d24	TBC1 domain family, member 24	protein coding gene	17	-	24394405	24424536	224617
ENSMUSG00000036499	Ensembl Gene Model	MGI:2442192	Eea1	early endosome antigen 1	protein coding gene	10	+	95776525	95881380	216238
ENSMUSG00000036501	Ensembl Gene Model	MGI:2447834	Fam13b	family with sequence similarity 13, member B	protein coding gene	18	-	34575404	34639884	225358
ENSMUSG00000036510	Ensembl Gene Model	MGI:107434	Cdh8	cadherin 8	protein coding gene	8	-	99751103	100143103	12564
ENSMUSG00000036534	Ensembl Gene Model	MGI:2679005	Slc38a7	solute carrier family 38, member 7	protein coding gene	8	-	96562548	96580167	234595
ENSMUSG00000036580	Ensembl Gene Model	MGI:2139806	Spg20	spastic paraplegia 20, spartin (Troyer syndrome) homolog (human)	protein coding gene	3	+	55019529	55044743	229285
ENSMUSG00000036591	Ensembl Gene Model	MGI:1918685	Arhgap21	Rho GTPase activating protein 21	protein coding gene	2	-	20852730	20973692	71435
ENSMUSG00000036667	Ensembl Gene Model	MGI:1914665	Tcaf1	TRPM8 channel-associated factor 1	protein coding gene	6	-	42644936	42687022	77574
ENSMUSG00000036764	Ensembl Gene Model	MGI:1353428	Dnajc12	DnaJ heat shock protein family (Hsp40) member C12	protein coding gene	10	+	63218222	63244619	30045
ENSMUSG00000036768	Ensembl Gene Model	MGI:1098258	Kif15	kinesin family member 15	protein coding gene	9	+	122780146	122847798	209737
ENSMUSG00000036777	Ensembl Gene Model	MGI:1920174	Anln	anillin, actin binding protein	protein coding gene	9	-	22243308	22300484	68743
ENSMUSG00000036779	Ensembl Gene Model	MGI:1917820	Tent4b	terminal nucleotidyltransferase 4B	protein coding gene	8	+	88925841	88986350	214627
ENSMUSG00000036817	Ensembl Gene Model	MGI:1924303	Sun1	Sad1 and UNC84 domain containing 1	protein coding gene	5	+	139186392	139235595	77053
ENSMUSG00000036825	Ensembl Gene Model	MGI:2139150	Ssx2ip	synovial sarcoma, X 2 interacting protein	protein coding gene	3	+	146110397	146145899	99167
ENSMUSG00000036894	Ensembl Gene Model	MGI:1921262	Rap2b	RAP2B, member of RAS oncogene family	protein coding gene	3	+	61271928	61276124	74012
ENSMUSG00000036928	Ensembl Gene Model	MGI:1355311	Stag3	stromal antigen 3	protein coding gene	5	+	138278502	138310655	50878
ENSMUSG00000036943	Ensembl Gene Model	MGI:2442982	Rab8b	RAB8B, member RAS oncogene family	protein coding gene	9	-	66750946	66826969	235442
ENSMUSG00000036990	Ensembl Gene Model	MGI:1098801	Otud4	OTU domain containing 4	protein coding gene	8	+	80366305	80404384	73945
ENSMUSG00000037104	Ensembl Gene Model	MGI:2385459	Socs5	suppressor of cytokine signaling 5	protein coding gene	17	+	87415107	87445267	56468
ENSMUSG00000037108	Ensembl Gene Model	MGI:2685899	Zcwpw1	zinc finger, CW type with PWWP domain 1	protein coding gene	5	+	137786060	137820883	381678
ENSMUSG00000037234	Ensembl Gene Model	MGI:2443554	Hook3	hook microtubule tethering protein 3	protein coding gene	8	-	26511449	26609252	320191
ENSMUSG00000037259	Ensembl Gene Model	MGI:2139080	Dzank1	double zinc ribbon and ankyrin repeat domains 1	protein coding gene	2	-	144312477	144369334	241688
ENSMUSG00000037266	Ensembl Gene Model	MGI:106498	Rsrp1	arginine/serine rich protein 1	protein coding gene	4	+	134650936	134654681	27981
ENSMUSG00000037286	Ensembl Gene Model	MGI:1098658	Stag1	stromal antigen 1	protein coding gene	9	+	100479762	100840597	20842
ENSMUSG00000037313	Ensembl Gene Model	MGI:1341163	Tacc3	transforming, acidic coiled-coil containing protein 3	protein coding gene	5	+	33814808	33829547	21335
ENSMUSG00000037315	Ensembl Gene Model	MGI:2148019	Jade3	jade family PHD finger 3	protein coding gene	X	+	20291927	20386178	382207
ENSMUSG00000037326	Ensembl Gene Model	MGI:1355075	Capn15	calpain 15	protein coding gene	17	-	26177338	26204770	50817
ENSMUSG00000037343	Ensembl Gene Model	MGI:2443028	Taf2	TATA-box binding protein associated factor 2	protein coding gene	15	-	54878527	54935548	319944
ENSMUSG00000037400	Ensembl Gene Model	MGI:1923545	Atp11b	ATPase, class VI, type 11B	protein coding gene	3	+	35808255	35910425	76295
ENSMUSG00000037434	Ensembl Gene Model	MGI:1345281	Slc30a1	solute carrier family 30 (zinc transporter), member 1	protein coding gene	1	+	191638879	191645359	22782
ENSMUSG00000037458	Ensembl Gene Model	MGI:1859169	Azin1	antizyme inhibitor 1	protein coding gene	15	-	38487671	38519510	54375
ENSMUSG00000037466	Ensembl Gene Model	MGI:2144738	Tedc1	tubulin epsilon and delta complex 1	protein coding gene	12	+	113120041	113129668	104732
ENSMUSG00000037474	Ensembl Gene Model	MGI:1924093	Dtl	denticleless E3 ubiquitin protein ligase	protein coding gene	1	-	191269468	191307656	76843
ENSMUSG00000037475	Ensembl Gene Model	MGI:2442413	Thoc2	THO complex 2	protein coding gene	X	-	40883869	41000878	331401
ENSMUSG00000037514	Ensembl Gene Model	MGI:1921700	Pank2	pantothenate kinase 2	protein coding gene	2	+	131104415	131141108	74450
ENSMUSG00000037519	Ensembl Gene Model	MGI:1924750	Ppfia1	protein tyrosine phosphatase, receptor type, f polypeptide (PTPRF), interacting protein (liprin), alpha 1	protein coding gene	7	-	144030495	144107466	233977
ENSMUSG00000037533	Ensembl Gene Model	MGI:2384761	Rapgef6	Rap guanine nucleotide exchange factor (GEF) 6	protein coding gene	11	+	54413673	54590111	192786
ENSMUSG00000037600	Ensembl Gene Model	MGI:1916323	Kdf1	keratinocyte differentiation factor 1	protein coding gene	4	+	133246274	133258101	69073
ENSMUSG00000037608	Ensembl Gene Model	MGI:1917580	Bclaf1	BCL2-associated transcription factor 1	protein coding gene	10	+	20187897	20218390	72567
ENSMUSG00000037730	Ensembl Gene Model	MGI:1931415	Mynn	myoneurin	protein coding gene	3	+	30656214	30674022	80732
ENSMUSG00000037808	Ensembl Gene Model	MGI:1920076	Fam76b	family with sequence similarity 76, member B	protein coding gene	9	+	13739012	13766283	72826
ENSMUSG00000037857	Ensembl Gene Model	MGI:1915814	Nufip2	nuclear FMR1 interacting protein 2	protein coding gene	11	+	77576566	77608792	68564
ENSMUSG00000037876	Ensembl Gene Model	MGI:1918614	Jmjd1c	jumonji domain containing 1C	protein coding gene	10	+	66932189	67092105	108829
ENSMUSG00000037887	Ensembl Gene Model	MGI:106626	Dusp8	dual specificity phosphatase 8	protein coding gene	7	-	141633227	141649580	18218
ENSMUSG00000037972	Ensembl Gene Model	MGI:1276549	Snn	stannin	protein coding gene	16	+	10884162	10892849	20621
ENSMUSG00000038039	Ensembl Gene Model	MGI:1917547	Gcc2	GRIP and coiled-coil domain containing 2	protein coding gene	10	+	58091319	58141421	70297
ENSMUSG00000038056	Ensembl Gene Model	MGI:2444959	Kmt2c	lysine (K)-specific methyltransferase 2C	protein coding gene	5	-	25476796	25703781	231051
ENSMUSG00000038065	Ensembl Gene Model	MGI:1915485	Mturn	maturin, neural progenitor differentiation regulator homolog (Xenopus)	protein coding gene	6	+	54658609	54680836	68235
ENSMUSG00000038069	Ensembl Gene Model	MGI:1918175	Cdkn2aip	CDKN2A interacting protein	protein coding gene	8	-	48162379	48166966	70925
ENSMUSG00000038094	Ensembl Gene Model	MGI:1924456	Atp13a4	ATPase type 13A4	protein coding gene	16	-	29214671	29363682	224079
ENSMUSG00000038121	Ensembl Gene Model	MGI:1914000	Fam210a	family with sequence similarity 210, member A	protein coding gene	18	-	68393258	68433404	108654
ENSMUSG00000038126	Ensembl Gene Model	MGI:2443138	Mphosph9	M-phase phosphoprotein 9	protein coding gene	5	-	124389022	124466035	269702
ENSMUSG00000038141	Ensembl Gene Model	MGI:1924356	Tmem181a	transmembrane protein 181A	protein coding gene	17	+	6307135	6358589	77106
ENSMUSG00000038206	Ensembl Gene Model	MGI:1354696	Fbxo8	F-box protein 8	protein coding gene	8	+	57004189	57046974	50753
ENSMUSG00000038212	Ensembl Gene Model	MGI:1913881	Mfsd14b	major facilitator superfamily domain containing 14B	protein coding gene	13	-	65212844	65260813	66631
ENSMUSG00000038252	Ensembl Gene Model	MGI:1915548	Ncapd2	non-SMC condensin I complex, subunit D2	protein coding gene	6	-	125144970	125168664	68298
ENSMUSG00000038370	Ensembl Gene Model	MGI:1913675	Pcp4l1	Purkinje cell protein 4-like 1	protein coding gene	1	-	171000833	171023837	66425
ENSMUSG00000038379	Ensembl Gene Model	MGI:1194921	Ttk	Ttk protein kinase	protein coding gene	9	+	83716742	83754442	22137
ENSMUSG00000038473	Ensembl Gene Model	MGI:1917979	Nos1ap	nitric oxide synthase 1 (neuronal) adaptor protein	protein coding gene	1	-	170143036	170417418	70729
ENSMUSG00000038481	Ensembl Gene Model	MGI:1925584	Cdk19	cyclin-dependent kinase 19	protein coding gene	10	+	40225283	40359814	78334
ENSMUSG00000038482	Ensembl Gene Model	MGI:101934	Tfdp1	transcription factor Dp 1	protein coding gene	8	+	13388751	13428448	21781
ENSMUSG00000038503	Ensembl Gene Model	MGI:1891421	Mesd	mesoderm development LRP chaperone	protein coding gene	7	+	83533074	83549519	67943
ENSMUSG00000038506	Ensembl Gene Model	MGI:2142792	Dcun1d2	DCN1, defective in cullin neddylation 1, domain containing 2 (S. cerevisiae)	protein coding gene	8	-	13305963	13338126	102323
ENSMUSG00000038518	Ensembl Gene Model	MGI:104813	Jarid2	jumonji, AT rich interactive domain 2	protein coding gene	13	+	44882950	45075119	16468
ENSMUSG00000038530	Ensembl Gene Model	MGI:108409	Rgs4	regulator of G-protein signaling 4	protein coding gene	1	-	169569046	169575211	19736
ENSMUSG00000038569	Ensembl Gene Model	MGI:2385231	Rad9b	RAD9 checkpoint clamp component B	protein coding gene	5	-	122461286	122492296	231724
ENSMUSG00000038594	Ensembl Gene Model	MGI:3642684	Cep85l	centrosomal protein 85-like	protein coding gene	10	-	53149539	53256043	100038725
ENSMUSG00000038602	Ensembl Gene Model	MGI:2139810	Slc35f1	solute carrier family 35, member F1	protein coding gene	10	+	52566629	52987718	215085
ENSMUSG00000038612	Ensembl Gene Model	MGI:101769	Mcl1	myeloid cell leukemia sequence 1	protein coding gene	3	+	95566099	95570487	17210
ENSMUSG00000038630	Ensembl Gene Model	MGI:3510405	Zkscan16	zinc finger with KRAB and SCAN domains 16	protein coding gene	4	+	58943628	58958355	100041581
ENSMUSG00000038646	Ensembl Gene Model	MGI:1914398	Ramac	RNA guanine-7 methyltransferase activating subunit	protein coding gene	7	+	81412701	81419238	67148
ENSMUSG00000038665	Ensembl Gene Model	MGI:2443430	Dgki	diacylglycerol kinase, iota	protein coding gene	6	-	36822957	37277119	320127
ENSMUSG00000038704	Ensembl Gene Model	MGI:1915602	Aspdh	aspartate dehydrogenase domain containing	protein coding gene	7	+	44114859	44117175	68352
ENSMUSG00000038705	Ensembl Gene Model	MGI:2652836	Gmeb2	glucocorticoid modulatory element binding protein 2	protein coding gene	2	-	180893242	180929828	229004
ENSMUSG00000038708	Ensembl Gene Model	MGI:1859646	Golga4	golgi autoantigen, golgin subfamily a, 4	protein coding gene	9	+	118335335	118411587	54214
ENSMUSG00000038733	Ensembl Gene Model	MGI:1923825	Wdr26	WD repeat domain 26	protein coding gene	1	-	181000793	181039566	226757
ENSMUSG00000038872	Ensembl Gene Model	MGI:99948	Zfhx3	zinc finger homeobox 3	protein coding gene	8	+	109005975	109688268	11906
ENSMUSG00000038914	Ensembl Gene Model	MGI:1344352	Dido1	death inducer-obliterator 1	protein coding gene	2	-	180299757	180351792	23856
ENSMUSG00000038916	Ensembl Gene Model	MGI:1914662	Soga3	SOGA family member 3	protein coding gene	10	+	29019992	29075626	67412
ENSMUSG00000038984	Ensembl Gene Model	MGI:2442458	Tspyl5	testis-specific protein, Y-encoded-like 5	protein coding gene	15	-	33684021	33688029	239364
ENSMUSG00000039116	Ensembl Gene Model	MGI:1916151	Adgrg6	adhesion G protein-coupled receptor G6	protein coding gene	10	-	14278327	14421403	215798
ENSMUSG00000039187	Ensembl Gene Model	MGI:2384790	Fanci	Fanconi anemia, complementation group I	protein coding gene	7	+	79042056	79100013	208836
ENSMUSG00000039194	Ensembl Gene Model	MGI:97930	Rlbp1	retinaldehyde binding protein 1	protein coding gene	7	-	79024618	79036796	19771
ENSMUSG00000039219	Ensembl Gene Model	MGI:2137512	Arid4b	AT rich interactive domain 4B (RBP1-like)	protein coding gene	13	+	14238334	14374188	94246
ENSMUSG00000039298	Ensembl Gene Model	MGI:2384875	Cdk5rap2	CDK5 regulatory subunit associated protein 2	protein coding gene	4	-	70135092	70328672	214444
ENSMUSG00000039318	Ensembl Gene Model	MGI:1916043	Rab3gap2	RAB3 GTPase activating protein subunit 2	protein coding gene	1	+	184936314	185018956	98732
ENSMUSG00000039428	Ensembl Gene Model	MGI:1920009	Tmem135	transmembrane protein 135	protein coding gene	7	-	88788922	89053430	72759
ENSMUSG00000039456	Ensembl Gene Model	MGI:2136841	Morc3	microrchidia 3	protein coding gene	16	+	93629009	93672961	338467
ENSMUSG00000039458	Ensembl Gene Model	MGI:2443034	Mtmr12	myotubularin related protein 12	protein coding gene	15	+	12205056	12272326	268783
ENSMUSG00000039501	Ensembl Gene Model	MGI:2138982	Znfx1	zinc finger, NFX1-type containing 1	protein coding gene	2	-	166877713	166904935	98999
ENSMUSG00000039563	Ensembl Gene Model	MGI:1923960	2210406O10Rik	RIKEN cDNA 2210406O10 gene	lncRNA gene	5	-	36604955	36622197	76710
ENSMUSG00000039620	Ensembl Gene Model	MGI:2442328	Trmt9b	tRNA methyltransferase 9B	protein coding gene	8	+	36924643	36981738	319582
ENSMUSG00000039630	Ensembl Gene Model	MGI:1858195	Hnrnpu	heterogeneous nuclear ribonucleoprotein U	protein coding gene	1	-	178148673	178165362	51810
ENSMUSG00000039633	Ensembl Gene Model	MGI:3609241	Lonrf1	LON peptidase N-terminal domain and ring finger 1	protein coding gene	8	-	36683216	36716513	244421
ENSMUSG00000039748	Ensembl Gene Model	MGI:1349427	Exo1	exonuclease 1	protein coding gene	1	+	175708334	175738962	26909
ENSMUSG00000039804	Ensembl Gene Model	MGI:2385165	Ncoa5	nuclear receptor coactivator 5	protein coding gene	2	-	164842277	164876787	228869
ENSMUSG00000039830	Ensembl Gene Model	MGI:1355331	Olig2	oligodendrocyte transcription factor 2	protein coding gene	16	+	91022345	91025565	50913
ENSMUSG00000039841	Ensembl Gene Model	MGI:1889334	Zfp800	zinc finger protein 800	protein coding gene	6	-	28239926	28398004	627049
ENSMUSG00000039879	Ensembl Gene Model	MGI:2685715	Heca	hdc homolog, cell cycle regulator	protein coding gene	10	-	17774788	17823815	380629
ENSMUSG00000039936	Ensembl Gene Model	MGI:1098211	Pik3cd	phosphatidylinositol-4,5-bisphosphate 3-kinase catalytic subunit delta	protein coding gene	4	-	149733625	149787023	18707
ENSMUSG00000039963	Ensembl Gene Model	MGI:2443893	Ccdc40	coiled-coil domain containing 40	protein coding gene	11	+	119119398	119156064	207607
ENSMUSG00000039976	Ensembl Gene Model	MGI:2652878	Tbc1d16	TBC1 domain family, member 16	protein coding gene	11	-	119033871	119119325	207592
ENSMUSG00000039987	Ensembl Gene Model	MGI:1916020	Phtf2	putative homeodomain transcription factor 2	protein coding gene	5	-	20963662	21087122	68770
ENSMUSG00000040021	Ensembl Gene Model	MGI:1333883	Lats1	large tumor suppressor	protein coding gene	10	+	7556978	7592224	16798
ENSMUSG00000040029	Ensembl Gene Model	MGI:2444611	Ipo8	importin 8	protein coding gene	6	-	148672181	148732965	320727
ENSMUSG00000040054	Ensembl Gene Model	MGI:2151152	Baz2a	bromodomain adjacent to zinc finger domain, 2A	protein coding gene	10	+	127927453	127965172	116848
ENSMUSG00000040123	Ensembl Gene Model	MGI:3041170	Zmym5	zinc finger, MYM-type 5	protein coding gene	14	-	57028042	57049173	219105
ENSMUSG00000040140	Ensembl Gene Model	MGI:2679727	Tdrd6	tudor domain containing 6	protein coding gene	17	-	43926226	43941190	210510
ENSMUSG00000040167	Ensembl Gene Model	MGI:1914393	Ikzf5	IKAROS family zinc finger 5	protein coding gene	7	-	130990381	131012250	67143
ENSMUSG00000040195	Ensembl Gene Model	MGI:2446113	Nemp1	nuclear envelope integral membrane protein 1	protein coding gene	10	+	127512934	127536918	210035
ENSMUSG00000040204	Ensembl Gene Model	MGI:1915276	Pclaf	PCNA clamp associated factor	protein coding gene	9	+	65797519	65810548	68026
ENSMUSG00000040242	Ensembl Gene Model	MGI:1914779	Fgfr1op2	FGFR1 oncogene partner 2	protein coding gene	6	+	146479401	146500696	67529
ENSMUSG00000040321	Ensembl Gene Model	MGI:2445100	Zfp770	zinc finger protein 770	protein coding gene	2	-	114023937	114031945	228491
ENSMUSG00000040374	Ensembl Gene Model	MGI:107486	Pex2	peroxisomal biogenesis factor 2	protein coding gene	3	-	5625248	5641299	19302
ENSMUSG00000040383	Ensembl Gene Model	MGI:1276102	Aqr	aquarius	protein coding gene	2	-	113931642	114005820	11834
ENSMUSG00000040423	Ensembl Gene Model	MGI:2685397	Rc3h1	RING CCCH (C3H) domains 1	protein coding gene	1	+	160733988	160802548	381305
ENSMUSG00000040459	Ensembl Gene Model	MGI:2442985	Arglu1	arginine and glutamate rich 1	protein coding gene	8	-	8715075	8740521	234023
ENSMUSG00000040565	Ensembl Gene Model	MGI:2147538	Btaf1	B-TFIID TATA-box binding protein associated factor 1	protein coding gene	19	+	36903479	36990152	107182
ENSMUSG00000040620	Ensembl Gene Model	MGI:2445102	Dhx33	DEAH (Asp-Glu-Ala-His) box polypeptide 33	protein coding gene	11	-	70874917	70895258	216877
ENSMUSG00000040624	Ensembl Gene Model	MGI:2676551	Plekhg1	pleckstrin homology domain containing, family G (with RhoGef domain) member 1	protein coding gene	10	+	3690364	3917303	213783
ENSMUSG00000040648	Ensembl Gene Model	MGI:2142810	Ppip5k2	diphosphoinositol pentakisphosphate kinase 2	protein coding gene	1	-	97633773	97698136	227399
ENSMUSG00000040653	Ensembl Gene Model	MGI:1923392	Ppp1r14c	protein phosphatase 1, regulatory inhibitor subunit 14C	protein coding gene	10	+	3316057	3414975	76142
ENSMUSG00000040661	Ensembl Gene Model	MGI:1933196	Rad54l2	RAD54 like 2 (S. cerevisiae)	protein coding gene	9	-	106565281	106666393	81000
ENSMUSG00000040701	Ensembl Gene Model	MGI:1328307	Ap1g2	adaptor protein complex AP-1, gamma 2 subunit	protein coding gene	14	-	55336292	55344050	11766
ENSMUSG00000040720	Ensembl Gene Model	MGI:1913435	Virma	vir like m6A methyltransferase associated	protein coding gene	4	+	11485958	11550684	66185
ENSMUSG00000040729	Ensembl Gene Model	MGI:2680221	Cep126	centrosomal protein 126	protein coding gene	9	-	8076462	8134295	234915
ENSMUSG00000040738	Ensembl Gene Model	MGI:1919906	Ints8	integrator complex subunit 8	protein coding gene	4	-	11199158	11254258	72656
ENSMUSG00000040812	Ensembl Gene Model	MGI:2443254	Agbl2	ATP/GTP binding protein-like 2	protein coding gene	2	+	90613071	90664781	271813
ENSMUSG00000040852	Ensembl Gene Model	MGI:2146813	Plekhh2	pleckstrin homology domain containing, family H (with MyTH4 domain) member 2	protein coding gene	17	+	84819323	84929566	213556
ENSMUSG00000040940	Ensembl Gene Model	MGI:1353510	Arhgef1	Rho guanine nucleotide exchange factor (GEF) 1	protein coding gene	7	+	24602337	24626019	16801
ENSMUSG00000041057	Ensembl Gene Model	MGI:1919765	Wdr43	WD repeat domain 43	protein coding gene	17	+	71923175	71966026	72515
ENSMUSG00000041064	Ensembl Gene Model	MGI:2143057	Pif1	PIF1 5'-to-3' DNA helicase	protein coding gene	9	+	65494442	65503249	208084
ENSMUSG00000041219	Ensembl Gene Model	MGI:2444300	Arhgap11a	Rho GTPase activating protein 11A	protein coding gene	2	-	113661837	113679006	228482
ENSMUSG00000041229	Ensembl Gene Model	MGI:2444341	Phf8	PHD finger protein 8	protein coding gene	X	+	150303668	150416855	320595
ENSMUSG00000041238	Ensembl Gene Model	MGI:2442995	Rbbp8	retinoblastoma binding protein 8, endonuclease	protein coding gene	18	+	11766333	11876264	225182
ENSMUSG00000041245	Ensembl Gene Model	MGI:2652875	Wnk3	WNK lysine deficient protein kinase 3	protein coding gene	X	+	149981074	150103148	279561
ENSMUSG00000041272	Ensembl Gene Model	MGI:2181659	Tox	thymocyte selection-associated high mobility group box	protein coding gene	4	-	6686353	6991557	252838
ENSMUSG00000041406	Ensembl Gene Model	MGI:3590554	BC055324	cDNA sequence BC055324	protein coding gene	1	-	163773562	163822365	381306
ENSMUSG00000041408	Ensembl Gene Model	MGI:2675859	Wapl	WAPL cohesin release factor	protein coding gene	14	+	34395885	34469940	218914
ENSMUSG00000041431	Ensembl Gene Model	MGI:88302	Ccnb1	cyclin B1	protein coding gene	13	-	100915247	100922994	268697
ENSMUSG00000041483	Ensembl Gene Model	MGI:3029290	Zfp281	zinc finger protein 281	protein coding gene	1	+	136552639	136557791	226442
ENSMUSG00000041498	Ensembl Gene Model	MGI:1098226	Kif14	kinesin family member 14	protein coding gene	1	+	136394081	136459249	381293
ENSMUSG00000041609	Ensembl Gene Model	MGI:1922915	Bicdl1	BICD family like cargo adaptor 1	protein coding gene	5	-	115786234	115869680	75665
ENSMUSG00000041777	Ensembl Gene Model	MGI:1914185	Cir1	corepressor interacting with RBPJ, 1	protein coding gene	2	-	73114216	73142936	66935
ENSMUSG00000041923	Ensembl Gene Model	MGI:2441684	Nol4	nucleolar protein 4	protein coding gene	18	-	22826238	23174710	319211
ENSMUSG00000041926	Ensembl Gene Model	MGI:2384902	Rnpep	arginyl aminopeptidase (aminopeptidase B)	protein coding gene	1	-	135190450	135211822	215615
ENSMUSG00000042029	Ensembl Gene Model	MGI:1923294	Ncapg2	non-SMC condensin II complex, subunit G2	protein coding gene	12	+	116368969	116427152	76044
ENSMUSG00000042042	Ensembl Gene Model	MGI:1926002	Csgalnact2	chondroitin sulfate N-acetylgalactosaminyltransferase 2	protein coding gene	6	-	118084413	118116101	78752
ENSMUSG00000042284	Ensembl Gene Model	MGI:96599	Itga1	integrin alpha 1	protein coding gene	13	-	115094615	115238500	109700
ENSMUSG00000042298	Ensembl Gene Model	MGI:1920045	Ttc19	tetratricopeptide repeat domain 19	protein coding gene	11	+	62172256	62208611	72795
ENSMUSG00000042305	Ensembl Gene Model	MGI:1914729	Tmem183a	transmembrane protein 183A	protein coding gene	1	-	134273835	134289717	57439
ENSMUSG00000042323	Ensembl Gene Model	MGI:1923998	Pbrm1	polybromo 1	protein coding gene	14	+	30741095	30843549	66923
ENSMUSG00000042350	Ensembl Gene Model	MGI:1915747	Arel1	apoptosis resistant E3 ubiquitin protein ligase 1	protein coding gene	12	-	84964922	85017674	68497
ENSMUSG00000042369	Ensembl Gene Model	MGI:2387367	Rbm45	RNA binding motif protein 45	protein coding gene	2	+	76200328	76214112	241490
ENSMUSG00000042446	Ensembl Gene Model	MGI:1915035	Zmym4	zinc finger, MYM-type 4	protein coding gene	4	-	126755732	126861928	67785
ENSMUSG00000042460	Ensembl Gene Model	MGI:2151071	C1galt1	core 1 synthase, glycoprotein-N-acetylgalactosamine 3-beta-galactosyltransferase, 1	protein coding gene	6	+	7845224	7872042	94192
ENSMUSG00000042489	Ensembl Gene Model	MGI:2445153	Clspn	claspin	protein coding gene	4	+	126450728	126487696	269582
ENSMUSG00000042579	Ensembl Gene Model	MGI:1921284	4632404H12Rik	RIKEN cDNA 4632404H12 gene	lncRNA gene	3	-	89674818	89680547	74034
ENSMUSG00000042604	Ensembl Gene Model	MGI:96661	Kcna4	potassium voltage-gated channel, shaker-related subfamily, member 4	protein coding gene	2	+	107120984	107128847	16492
ENSMUSG00000042628	Ensembl Gene Model	MGI:3026685	Zfyve1	zinc finger, FYVE domain containing 1	protein coding gene	12	-	83593332	83643996	217695
ENSMUSG00000042682	Ensembl Gene Model	MGI:1931466	Selenok	selenoprotein K	protein coding gene	14	+	29690337	29697031	80795
ENSMUSG00000042724	Ensembl Gene Model	MGI:2449952	Map3k9	mitogen-activated protein kinase kinase kinase 9	protein coding gene	12	-	81767784	81827949	338372
ENSMUSG00000042793	Ensembl Gene Model	MGI:2441805	Lgr6	leucine-rich repeat-containing G protein-coupled receptor 6	protein coding gene	1	-	134911039	135033014	329252
ENSMUSG00000042807	Ensembl Gene Model	MGI:2685817	Hecw2	HECT, C2 and WW domain containing E3 ubiquitin protein ligase 2	protein coding gene	1	-	53846031	54234193	329152
ENSMUSG00000042834	Ensembl Gene Model	MGI:99444	Nrep	neuronal regeneration related protein	protein coding gene	18	-	33570072	33597082	27528
ENSMUSG00000042857	Ensembl Gene Model	MGI:3641792	Gm9776	predicted gene 9776	lncRNA gene	13	-	94493255	94495431	328309
ENSMUSG00000043051	Ensembl Gene Model	MGI:2447658	Disc1	disrupted in schizophrenia 1	protein coding gene	8	+	125780934	125988597	244667
ENSMUSG00000043140	Ensembl Gene Model	MGI:1913940	Tmem186	transmembrane protein 186	protein coding gene	16	-	8451595	8455575	66690
ENSMUSG00000043252	Ensembl Gene Model	MGI:2140359	Tmem64	transmembrane protein 64	protein coding gene	4	+	15265831	15286753	100201
ENSMUSG00000043411	Ensembl Gene Model	MGI:2158502	Usp48	ubiquitin specific peptidase 48	protein coding gene	4	+	137321461	137385848	170707
ENSMUSG00000043881	Ensembl Gene Model	MGI:2685141	Kbtbd7	kelch repeat and BTB (POZ) domain containing 7	protein coding gene	14	+	79663951	79668476	211255
ENSMUSG00000043929	Ensembl Gene Model	MGI:1923400	Klhl15	kelch-like 15	protein coding gene	X	+	93278205	93321330	236904
ENSMUSG00000043962	Ensembl Gene Model	MGI:2442637	Thrap3	thyroid hormone receptor associated protein 3	protein coding gene	4	-	126057875	126096548	230753
ENSMUSG00000043991	Ensembl Gene Model	MGI:103079	Pura	purine rich element binding protein A	protein coding gene	18	+	36414150	36425588	19290
ENSMUSG00000044167	Ensembl Gene Model	MGI:1890077	Foxo1	forkhead box O1	protein coding gene	3	+	52175758	52257530	56458
ENSMUSG00000044177	Ensembl Gene Model	MGI:2669209	Wfikkn2	WAP, follistatin/kazal, immunoglobulin, kunitz and netrin domain containing 2	protein coding gene	11	-	94126782	94136831	278507
ENSMUSG00000044345	Ensembl Gene Model	MGI:2147570	Marveld1	MARVEL (membrane-associating) domain containing 1	protein coding gene	19	+	42135839	42140142	277010
ENSMUSG00000044365	Ensembl Gene Model	MGI:2442112	Cxxc4	CXXC finger 4	protein coding gene	3	+	133942245	133967922	319478
ENSMUSG00000044499	Ensembl Gene Model	MGI:2441996	Hs3st5	heparan sulfate (glucosamine) 3-O-sulfotransferase 5	protein coding gene	10	+	36382810	36710393	319415
ENSMUSG00000044647	Ensembl Gene Model	MGI:1925021	Csrnp3	cysteine-serine-rich nuclear protein 3	protein coding gene	2	+	65676111	65861890	77771
ENSMUSG00000044730	Ensembl Gene Model	MGI:3041172	9930104L06Rik	RIKEN cDNA 9930104L06 gene	protein coding gene	4	+	124830841	124838449	194268
ENSMUSG00000044763	Ensembl Gene Model	MGI:1196261	Trmt10c	tRNA methyltransferase 10C, mitochondrial RNase P subunit	protein coding gene	16	-	55854083	55858149	52575
ENSMUSG00000044783	Ensembl Gene Model	MGI:2685821	Hjurp	Holliday junction recognition protein	protein coding gene	1	-	88190193	88205355	381280
ENSMUSG00000044807	Ensembl Gene Model	MGI:1353621	Zfp354c	zinc finger protein 354C	protein coding gene	11	-	50701913	50718551	30944
ENSMUSG00000044982	Ensembl Gene Model	MGI:1914408	Sft2d3	SFT2 domain containing 3	protein coding gene	18	-	32042151	32044877	67158
ENSMUSG00000045062	Ensembl Gene Model	MGI:2136741	Pcdhb7	protocadherin beta 7	protein coding gene	18	+	37474755	37478255	93878
ENSMUSG00000045098	Ensembl Gene Model	MGI:2444557	Kmt5b	lysine methyltransferase 5B	protein coding gene	19	+	3817421	3868303	225888
ENSMUSG00000045174	Ensembl Gene Model	MGI:3026939	Amer3	APC membrane recruitment 3	protein coding gene	1	+	34618738	34630025	211383
ENSMUSG00000045210	Ensembl Gene Model	MGI:1917925	Vcpip1	valosin containing protein (p97)/p47 complex interacting protein 1	protein coding gene	1	-	9788847	9818607	70675
ENSMUSG00000045328	Ensembl Gene Model	MGI:1098230	Cenpe	centromere protein E	protein coding gene	3	+	134918324	134979301	229841
ENSMUSG00000045414	Ensembl Gene Model	MGI:1916111	Dipk2a	divergent protein kinase domain 2A	protein coding gene	9	-	94399917	94420134	68861
ENSMUSG00000045519	Ensembl Gene Model	MGI:1915280	Zfp560	zinc finger protein 560	protein coding gene	9	-	20256432	20296473	434377
ENSMUSG00000045624	Ensembl Gene Model	MGI:1913830	Esf1	ESF1 nucleolar pre-rRNA processing protein homolog	protein coding gene	2	-	139961803	140012484	66580
ENSMUSG00000045671	Ensembl Gene Model	MGI:2150019	Spred2	sprouty-related EVH1 domain containing 2	protein coding gene	11	+	19874442	19974026	114716
ENSMUSG00000045761	Ensembl Gene Model	MGI:2443498	Togaram2	TOG array regulator of axonemal microtubules 2	protein coding gene	17	+	71980256	72036664	320159
ENSMUSG00000045767	Ensembl Gene Model	MGI:1925771	B230219D22Rik	RIKEN cDNA B230219D22 gene	protein coding gene	13	+	55840937	55851313	78521
ENSMUSG00000045817	Ensembl Gene Model	MGI:107945	Zfp36l2	zinc finger protein 36, C3H type-like 2	protein coding gene	17	-	84491359	84495375	12193
ENSMUSG00000045967	Ensembl Gene Model	MGI:2441697	Gpr158	G protein-coupled receptor 158	protein coding gene	2	+	21372378	21835355	241263
ENSMUSG00000045969	Ensembl Gene Model	MGI:1349481	Ing1	inhibitor of growth family, member 1	protein coding gene	8	+	11605762	11613251	26356
ENSMUSG00000046096	Ensembl Gene Model	MGI:2446240	Mosmo	modulator of smoothened	protein coding gene	7	+	120276841	120334077	233812
ENSMUSG00000046160	Ensembl Gene Model	MGI:1355334	Olig1	oligodendrocyte transcription factor 1	protein coding gene	16	+	91066660	91068821	50914
ENSMUSG00000046169	Ensembl Gene Model	MGI:1347348	Adamts6	a disintegrin-like and metallopeptidase (reprolysin type) with thrombospondin type 1 motif, 6	protein coding gene	13	+	104424343	104633203	108154
ENSMUSG00000046185	Ensembl Gene Model	MGI:107780	Zfp84	zinc finger protein 84	protein coding gene	7	+	29467977	29479246	74352
ENSMUSG00000046201	Ensembl Gene Model	MGI:1925212	Scaf8	SR-related CTD-associated factor 8	protein coding gene	17	+	3165247	3249134	106583
ENSMUSG00000046380	Ensembl Gene Model	MGI:106214	Jrk	jerky	protein coding gene	15	-	74574261	74581171	16469
ENSMUSG00000046699	Ensembl Gene Model	MGI:2442509	Slitrk4	SLIT and NTRK-like family, member 4	protein coding gene	X	-	63308491	63320602	245446
ENSMUSG00000046785	Ensembl Gene Model	MGI:1925031	Epm2aip1	EPM2A (laforin) interacting protein 1	protein coding gene	9	+	111100997	111108161	77781
ENSMUSG00000046862	Ensembl Gene Model	MGI:2140473	Pramel12	PRAME like 12	protein coding gene	4	+	143138996	143147661	242736
ENSMUSG00000046881	Ensembl Gene Model	MGI:3030208	Or1ab2	olfactory receptor family 1 subfamily AB member 2	protein coding gene	8	+	72860884	72864353	258335
ENSMUSG00000046959	Ensembl Gene Model	MGI:2385894	Slc26a1	solute carrier family 26 (sulfate transporter), member 1	protein coding gene	5	-	108817744	108823435	231583
ENSMUSG00000046994	Ensembl Gene Model	MGI:2444136	Mars2	methionine-tRNA synthetase 2 (mitochondrial)	protein coding gene	1	+	55276336	55279217	212679
ENSMUSG00000047153	Ensembl Gene Model	MGI:2451333	Khnyn	KH and NYN domain containing	protein coding gene	14	+	56122404	56136232	219094
ENSMUSG00000047213	Ensembl Gene Model	MGI:1918850	Ythdf3	YTH N6-methyladenosine RNA binding protein 3	protein coding gene	3	+	16237376	16271201	229096
ENSMUSG00000047238	Ensembl Gene Model	MGI:1922875	Mageh1	MAGE family member H1	protein coding gene	X	-	151819162	151820559	75625
ENSMUSG00000047261	Ensembl Gene Model	MGI:95639	Gap43	growth associated protein 43	protein coding gene	16	-	42068915	42161014	14432
ENSMUSG00000047414	Ensembl Gene Model	MGI:3603594	Flrt2	fibronectin leucine rich transmembrane protein 2	protein coding gene	12	+	95659000	95751989	399558
ENSMUSG00000047496	Ensembl Gene Model	MGI:2443787	Rnf152	ring finger protein 152	protein coding gene	1	-	105204639	105284435	320311
ENSMUSG00000047507	Ensembl Gene Model	MGI:2685783	Baiap3	BAI1-associated protein 3	protein coding gene	17	-	25461633	25475338	545192
ENSMUSG00000047514	Ensembl Gene Model	MGI:1298395	Tspyl1	testis-specific protein, Y-encoded-like 1	protein coding gene	10	+	34158186	34160881	22110
ENSMUSG00000047534	Ensembl Gene Model	MGI:2145099	Mis18bp1	MIS18 binding protein 1	protein coding gene	12	-	65179508	65219354	217653
ENSMUSG00000047603	Ensembl Gene Model	MGI:1929117	Zfp235	zinc finger protein 235	protein coding gene	7	+	23833594	23842666	56525
ENSMUSG00000047648	Ensembl Gene Model	MGI:1919115	Fbxo30	F-box protein 30	protein coding gene	10	+	11157074	11173796	71865
ENSMUSG00000047669	Ensembl Gene Model	MGI:1920640	Msl3l2	MSL3 like 2	protein coding gene	10	+	55983013	55992976	73390
ENSMUSG00000047731	Ensembl Gene Model	MGI:107577	Wbp1l	WW domain binding protein 1 like	protein coding gene	19	+	46587545	46645828	226178
ENSMUSG00000047773	Ensembl Gene Model	MGI:2686021	Ankfn1	ankyrin-repeat and fibronectin type III domain containing 1	protein coding gene	11	-	89280918	89668727	382543
ENSMUSG00000047804	Ensembl Gene Model	MGI:1890218	Akap10	A kinase (PRKA) anchor protein 10	protein coding gene	11	-	61762133	61821078	56697
ENSMUSG00000047909	Ensembl Gene Model	MGI:2444796	Ankrd16	ankyrin repeat domain 16	protein coding gene	2	+	11782687	11795140	320816
ENSMUSG00000047945	Ensembl Gene Model	MGI:97143	Marcksl1	MARCKS-like 1	protein coding gene	4	+	129407374	129409774	17357
ENSMUSG00000048000	Ensembl Gene Model	MGI:2138584	Gigyf2	GRB10 interacting GYF protein 2	protein coding gene	1	+	87254720	87378518	227331
ENSMUSG00000048118	Ensembl Gene Model	MGI:2444354	Arid4a	AT rich interactive domain 4A (RBP1-like)	protein coding gene	12	+	71062764	71145366	238247
ENSMUSG00000048138	Ensembl Gene Model	MGI:1330307	Dmrt2	doublesex and mab-3 related transcription factor 2	protein coding gene	19	+	25649775	25656355	226049
ENSMUSG00000048216	Ensembl Gene Model	MGI:1927851	Gpr85	G protein-coupled receptor 85	protein coding gene	6	-	13834457	13839941	64450
ENSMUSG00000048222	Ensembl Gene Model	MGI:3694697	Mfap1b	microfibrillar-associated protein 1B	protein coding gene	2	-	121292147	121304504	100034361
ENSMUSG00000048234	Ensembl Gene Model	MGI:2677438	Rnf149	ring finger protein 149	protein coding gene	1	-	39590377	39616486	67702
ENSMUSG00000048271	Ensembl Gene Model	MGI:1919670	Rbm33	RNA binding motif protein 33	protein coding gene	5	+	28522119	28624237	381626
ENSMUSG00000048327	Ensembl Gene Model	MGI:1917716	Ckap2l	cytoskeleton associated protein 2-like	protein coding gene	2	-	129110130	129139132	70466
ENSMUSG00000048379	Ensembl Gene Model	MGI:1914546	Socs4	suppressor of cytokine signaling 4	protein coding gene	14	+	47514388	47533559	67296
ENSMUSG00000048410	Ensembl Gene Model	MGI:2685179	Zfp407	zinc finger protein 407	protein coding gene	18	-	84225826	84612815	240476
ENSMUSG00000048612	Ensembl Gene Model	MGI:1919192	Myof	myoferlin	protein coding gene	19	-	37887484	38032025	226101
ENSMUSG00000048706	Ensembl Gene Model	MGI:106510	Lurap1l	leucine rich adaptor protein 1-like	protein coding gene	4	+	80828923	80872538	52829
ENSMUSG00000048721	Ensembl Gene Model	MGI:2443410	Fndc9	fibronectin type III domain containing 9	protein coding gene	11	+	46126384	46130698	320116
ENSMUSG00000048732	Ensembl Gene Model	MGI:2388648	Klhl11	kelch-like 11	protein coding gene	11	-	100353440	100363567	217194
ENSMUSG00000048787	Ensembl Gene Model	MGI:2679003	Dcun1d3	DCN1, defective in cullin neddylation 1, domain containing 3 (S. cerevisiae)	protein coding gene	7	-	119452381	119495553	233805
ENSMUSG00000048874	Ensembl Gene Model	MGI:2446126	Phf3	PHD finger protein 3	protein coding gene	1	-	30841423	30912989	213109
ENSMUSG00000049123	Ensembl Gene Model	MGI:1923968	Catsperg2	cation channel sperm associated auxiliary subunit gamma 2	protein coding gene	7	-	29396644	29426457	76718
ENSMUSG00000049148	Ensembl Gene Model	MGI:2442605	Plcxd3	phosphatidylinositol-specific phospholipase C, X domain containing 3	protein coding gene	15	+	4404973	4605035	239318
ENSMUSG00000049307	Ensembl Gene Model	MGI:95594	Fut4	fucosyltransferase 4	protein coding gene	9	-	14659755	14663418	14345
ENSMUSG00000049313	Ensembl Gene Model	MGI:1202296	Sorl1	sortilin-related receptor, LDLR class A repeats-containing	protein coding gene	9	-	41876016	42035593	20660
ENSMUSG00000049323	Ensembl Gene Model	MGI:2444720	Smcr8	Smith-Magenis syndrome chromosome region, candidate 8 homolog (human)	protein coding gene	11	+	60668351	60679113	237782
ENSMUSG00000049571	Ensembl Gene Model	MGI:2444387	Cfap46	cilia and flagella associated protein 46	protein coding gene	7	-	139180867	139263733	212124
ENSMUSG00000049606	Ensembl Gene Model	MGI:1277212	Zfp644	zinc finger protein 644	protein coding gene	5	-	106764605	106844696	52397
ENSMUSG00000049657	Ensembl Gene Model	MGI:1924601	Zbtb5	zinc finger and BTB domain containing 5	protein coding gene	4	-	44991242	45012412	230119
ENSMUSG00000049659	Ensembl Gene Model	MGI:1923012	Aftph	aftiphilin	protein coding gene	11	-	20635084	20691589	216549
ENSMUSG00000049739	Ensembl Gene Model	MGI:3665412	Zfp646	zinc finger protein 646	protein coding gene	7	+	127476074	127485168	233905
ENSMUSG00000049755	Ensembl Gene Model	MGI:2442105	Zfp672	zinc finger protein 672	protein coding gene	11	-	58205940	58221165	319475
ENSMUSG00000049764	Ensembl Gene Model	MGI:1927865	Zfp280b	zinc finger protein 280B	protein coding gene	10	+	75868235	75878804	64453
ENSMUSG00000050017	Ensembl Gene Model	MGI:1927542	Pitpnb	phosphatidylinositol transfer protein, beta	protein coding gene	5	+	111478629	111536225	56305
ENSMUSG00000050064	Ensembl Gene Model	MGI:2139736	Zfp697	zinc finger protein 697	protein coding gene	3	+	98289278	98508893	242109
ENSMUSG00000050079	Ensembl Gene Model	MGI:1914860	Rspry1	ring finger and SPRY domain containing 1	protein coding gene	8	+	95328569	95386905	67610
ENSMUSG00000050147	Ensembl Gene Model	MGI:1298207	F2rl3	coagulation factor II (thrombin) receptor-like 3	protein coding gene	8	+	73488508	73490502	14065
ENSMUSG00000050244	Ensembl Gene Model	MGI:2442524	Heatr1	HEAT repeat containing 1	protein coding gene	13	+	12410256	12453774	217995
ENSMUSG00000050312	Ensembl Gene Model	MGI:2146565	Nsun3	NOL1/NOP2/Sun domain family member 3	protein coding gene	16	-	62552807	62607181	106338
ENSMUSG00000050315	Ensembl Gene Model	MGI:2153070	Synpo2	synaptopodin 2	protein coding gene	3	-	122870168	123029798	118449
ENSMUSG00000050697	Ensembl Gene Model	MGI:2145955	Prkaa1	protein kinase, AMP-activated, alpha 1 catalytic subunit	protein coding gene	15	+	5173343	5211380	105787
ENSMUSG00000050732	Ensembl Gene Model	MGI:1336882	Vamp8	vesicle-associated membrane protein 8	protein coding gene	6	-	72362204	72367650	22320
ENSMUSG00000050821	Ensembl Gene Model	MGI:1925658	Fam131a	family with sequence similarity 131, member A	protein coding gene	16	+	20511991	20521798	78408
ENSMUSG00000050954	Ensembl Gene Model	MGI:1915161	Zfp169	zinc finger protein 169	protein coding gene	13	-	48641123	48666927	67911
ENSMUSG00000051079	Ensembl Gene Model	MGI:2180585	Rgs13	regulator of G-protein signaling 13	protein coding gene	1	-	144014392	144053110	246709
ENSMUSG00000051220	Ensembl Gene Model	MGI:2654144	Ercc6l	excision repair cross-complementing rodent repair deficiency complementation group 6 like	protein coding gene	X	-	101186426	101200697	236930
ENSMUSG00000051228	Ensembl Gene Model	MGI:2448607	Nyx	nyctalopin	protein coding gene	X	+	13332349	13355552	236690
ENSMUSG00000051235	Ensembl Gene Model	MGI:2443149	Gen1	GEN1, Holliday junction 5' flap endonuclease	protein coding gene	12	-	11288921	11315802	209334
ENSMUSG00000051316	Ensembl Gene Model	MGI:1346348	Taf7	TATA-box binding protein associated factor 7	protein coding gene	18	-	37773544	37777257	24074
ENSMUSG00000051323	Ensembl Gene Model	MGI:2685563	Pcdh19	protocadherin 19	protein coding gene	X	-	132483609	132589736	279653
ENSMUSG00000051329	Ensembl Gene Model	MGI:1926227	Nup160	nucleoporin 160	protein coding gene	2	+	90507559	90566672	59015
ENSMUSG00000051335	Ensembl Gene Model	MGI:2145304	Gfod1	glucose-fructose oxidoreductase domain containing 1	protein coding gene	13	-	43348721	43457648	328232
ENSMUSG00000051351	Ensembl Gene Model	MGI:99192	Zfp46	zinc finger protein 46	protein coding gene	4	+	136011994	136021253	22704
ENSMUSG00000051378	Ensembl Gene Model	MGI:2446979	Kif18b	kinesin family member 18B	protein coding gene	11	-	102796355	102815950	70218
ENSMUSG00000051379	Ensembl Gene Model	MGI:1918686	Flrt3	fibronectin leucine rich transmembrane protein 3	protein coding gene	2	-	140500118	140513396	71436
ENSMUSG00000051537	Ensembl Gene Model	MGI:3643622	Gm5124	predicted pseudogene 5124	pseudogene	X	+	21227104	21230861	331392
ENSMUSG00000051590	Ensembl Gene Model	MGI:1203481	Map3k19	mitogen-activated protein kinase kinase kinase 19	protein coding gene	1	-	127742528	127782768	22625
ENSMUSG00000051675	Ensembl Gene Model	MGI:1917057	Trim32	tripartite motif-containing 32	protein coding gene	4	+	65523223	65534475	69807
ENSMUSG00000052040	Ensembl Gene Model	MGI:1354948	Klf13	Kruppel-like factor 13	protein coding gene	7	-	63536099	63588663	50794
ENSMUSG00000052137	Ensembl Gene Model	MGI:1924854	Rbm12b2	RNA binding motif protein 12 B2	protein coding gene	4	+	12089439	12096243	77604
ENSMUSG00000052291	Ensembl Gene Model	MGI:3026931	5330438D12Rik	RIKEN cDNA 5330438D12 gene	lncRNA gene	10	+	116416787	116419418	327824
ENSMUSG00000052331	Ensembl Gene Model	MGI:3045243	Ankrd44	ankyrin repeat domain 44	protein coding gene	1	-	54684499	54965546	329154
ENSMUSG00000052387	Ensembl Gene Model	MGI:2443101	Trpm3	transient receptor potential cation channel, subfamily M, member 3	protein coding gene	19	+	22116410	22972774	226025
ENSMUSG00000052415	Ensembl Gene Model	MGI:2177944	Tchh	trichohyalin	protein coding gene	3	+	93349637	93356384	99681
ENSMUSG00000052446	Ensembl Gene Model	MGI:3583954	Zfp961	zinc finger protein 961	protein coding gene	8	+	72704910	72724177	234413
ENSMUSG00000052459	Ensembl Gene Model	MGI:1201780	Atp6v1a	ATPase, H+ transporting, lysosomal V1 subunit A	protein coding gene	16	-	43905765	43960064	11964
ENSMUSG00000052479	Ensembl Gene Model	MGI:2443215	A330008L17Rik	RIKEN cDNA A330008L17 gene	lncRNA gene	8	+	100143306	100460070	234624
ENSMUSG00000052572	Ensembl Gene Model	MGI:1344351	Dlg2	discs large MAGUK scaffold protein 2	protein coding gene	7	+	90125880	92098455	23859
ENSMUSG00000052656	Ensembl Gene Model	MGI:109483	Rnf103	ring finger protein 103	protein coding gene	6	+	71470878	71487865	22644
ENSMUSG00000052684	Ensembl Gene Model	MGI:96646	Jun	jun proto-oncogene	protein coding gene	4	-	94937273	94940459	16476
ENSMUSG00000052707	Ensembl Gene Model	MGI:2385292	Tnrc6a	trinucleotide repeat containing 6a	protein coding gene	7	+	122723108	122794519	233833
ENSMUSG00000052812	Ensembl Gene Model	MGI:2444798	Atad2b	ATPase family, AAA domain containing 2B	protein coding gene	12	+	4967353	5097394	320817
ENSMUSG00000052833	Ensembl Gene Model	MGI:1929264	Sae1	SUMO1 activating enzyme subunit 1	protein coding gene	7	-	16054159	16121731	56459
ENSMUSG00000052917	Ensembl Gene Model	MGI:1913565	Senp7	SUMO1/sentrin specific peptidase 7	protein coding gene	16	+	55869306	56010394	66315
ENSMUSG00000053025	Ensembl Gene Model	MGI:1927338	Sv2b	synaptic vesicle glycoprotein 2 b	protein coding gene	7	-	74764642	74959010	64176
ENSMUSG00000053080	Ensembl Gene Model	MGI:1919667	Zfta	zinc finger translocation associated	protein coding gene	19	+	7394990	7403269	108899
ENSMUSG00000053134	Ensembl Gene Model	MGI:1919445	Supt7l	SPT7-like, STAGA complex gamma subunit	protein coding gene	5	-	31671913	31684106	72195
ENSMUSG00000053198	Ensembl Gene Model	MGI:108176	Prx	periaxin	protein coding gene	7	+	27198730	27219466	19153
ENSMUSG00000053414	Ensembl Gene Model	MGI:1347352	Hunk	hormonally upregulated Neu-associated kinase	protein coding gene	16	+	90182901	90296441	26559
ENSMUSG00000053510	Ensembl Gene Model	MGI:1201386	Nrd1	nardilysin, N-arginine dibasic convertase, NRD convertase 1	protein coding gene	4	+	108857852	108918974	230598
ENSMUSG00000053536	Ensembl Gene Model	MGI:1932622	Cstf2t	cleavage stimulation factor, 3' pre-RNA subunit 2, tau	protein coding gene	19	+	31060241	31063992	83410
ENSMUSG00000053574	Ensembl Gene Model	MGI:1922554	4930563E22Rik	RIKEN cDNA 4930563E22 gene	protein coding gene	11	+	72105964	72109270	75304
ENSMUSG00000053641	Ensembl Gene Model	MGI:2142979	Dennd4a	DENN/MADD domain containing 4A	protein coding gene	9	+	64718622	64826949	102442
ENSMUSG00000053841	Ensembl Gene Model	MGI:105968	Txlna	taxilin alpha	protein coding gene	4	-	129519871	129534858	109658
ENSMUSG00000054099	Ensembl Gene Model	MGI:2442486	Slc25a40	solute carrier family 25, member 40	protein coding gene	5	+	8472850	8504797	319653
ENSMUSG00000054499	Ensembl Gene Model	MGI:1914629	Dedd2	death effector domain-containing DNA binding protein 2	protein coding gene	7	-	24899337	24920035	67379
ENSMUSG00000054556	Ensembl Gene Model	MGI:3647654	Gm4876	predicted gene 4876	lncRNA gene	6	-	17076260	17171832	232599
ENSMUSG00000054648	Ensembl Gene Model	MGI:1914119	Zfp869	zinc finger protein 869	protein coding gene	8	-	70157787	70169718	66869
ENSMUSG00000055240	Ensembl Gene Model	MGI:107547	Zfp101	zinc finger protein 101	protein coding gene	17	-	33599148	33613611	22643
ENSMUSG00000055371	Ensembl Gene Model	MGI:1929100	Stam2	signal transducing adaptor molecule (SH3 domain and ITAM motif) 2	protein coding gene	2	-	52582218	52632212	56324
ENSMUSG00000055430	Ensembl Gene Model	MGI:1923555	Nap1l5	nucleosome assembly protein 1-like 5	protein coding gene	6	-	58882218	58884061	58243
ENSMUSG00000055480	Ensembl Gene Model	MGI:3040691	Zfp458	zinc finger protein 458	protein coding gene	13	-	67402982	67426530	238690
ENSMUSG00000055485	Ensembl Gene Model	MGI:2444575	Soga1	suppressor of glucose, autophagy associated 1	protein coding gene	2	-	156857719	156921174	320706
ENSMUSG00000055670	Ensembl Gene Model	MGI:2444286	Zzef1	zinc finger, ZZ-type with EF hand domain 1	protein coding gene	11	+	72687052	72817946	195018
ENSMUSG00000055733	Ensembl Gene Model	MGI:1859565	Nap1l3	nucleosome assembly protein 1-like 3	protein coding gene	X	-	121304257	121307082	54561
ENSMUSG00000055932	Ensembl Gene Model	MGI:1347093	Fto	fat mass and obesity associated	protein coding gene	8	+	92040153	92395067	26383
ENSMUSG00000056260	Ensembl Gene Model	MGI:2445214	Lrif1	ligand dependent nuclear receptor interacting factor 1	protein coding gene	3	+	106592303	106643893	321000
ENSMUSG00000056383	Ensembl Gene Model	MGI:2142079	AI987944	expressed sequence AI987944	protein coding gene	7	-	41022347	41042803	233168
ENSMUSG00000056492	Ensembl Gene Model	MGI:2182928	Adgrf5	adhesion G protein-coupled receptor F5	protein coding gene	17	+	43671342	43770448	224792
ENSMUSG00000056673	Ensembl Gene Model	MGI:99780	Kdm5d	lysine (K)-specific demethylase 5D	protein coding gene	Y	+	897566	943813	20592
ENSMUSG00000056895	Ensembl Gene Model	MGI:1925553	H2bu2	H2B.U histone 2	protein coding gene	11	+	58839737	58840198	78303
ENSMUSG00000057098	Ensembl Gene Model	MGI:95275	Ebf1	early B cell factor 1	protein coding gene	11	+	44508144	44898918	13591
ENSMUSG00000057182	Ensembl Gene Model	MGI:98249	Scn3a	sodium channel, voltage-gated, type III, alpha	protein coding gene	2	-	65287462	65397935	20269
ENSMUSG00000057329	Ensembl Gene Model	MGI:88138	Bcl2	B cell leukemia/lymphoma 2	protein coding gene	1	-	106465908	106642004	12043
ENSMUSG00000057378	Ensembl Gene Model	MGI:99684	Ryr3	ryanodine receptor 3	protein coding gene	2	-	112461700	113047441	20192
ENSMUSG00000057522	Ensembl Gene Model	MGI:1343085	Spop	speckle-type BTB/POZ protein	protein coding gene	11	+	95304906	95384232	20747
ENSMUSG00000057637	Ensembl Gene Model	MGI:107628	Prdm2	PR domain containing 2, with ZNF domain	protein coding gene	4	-	142833961	142939560	110593
ENSMUSG00000057788	Ensembl Gene Model	MGI:2136689	Ddx49	DEAD box helicase 49	protein coding gene	8	-	70745516	70755121	234374
ENSMUSG00000058385	Ensembl Gene Model	MGI:2448386	H2bc8	H2B clustered histone 8	protein coding gene	13	+	23755574	23756037	319181
ENSMUSG00000058503	Ensembl Gene Model	MGI:1915402	Fam133b	family with sequence similarity 133, member B	protein coding gene	5	+	3593833	3620238	68152
ENSMUSG00000058729	Ensembl Gene Model	MGI:1919818	Lin9	lin-9 DREAM MuvB core complex component	protein coding gene	1	+	180468715	180518252	72568
ENSMUSG00000058748	Ensembl Gene Model	MGI:2385298	Zfp958	zinc finger protein 958	protein coding gene	8	+	4663167	4680231	233987
ENSMUSG00000058761	Ensembl Gene Model	MGI:1920257	Rnf169	ring finger protein 169	protein coding gene	7	-	99569461	99629655	108937
ENSMUSG00000059013	Ensembl Gene Model	MGI:1351631	Sh2d3c	SH2 domain containing 3C	protein coding gene	2	+	32611067	32645019	27387
ENSMUSG00000059263	Ensembl Gene Model	MGI:1922246	Usp47	ubiquitin specific peptidase 47	protein coding gene	7	+	111622711	111710868	74996
ENSMUSG00000059423	Ensembl Gene Model	MGI:1922865	Zfp933	zinc finger protein 933	protein coding gene	4	-	147907443	147932823	242747
ENSMUSG00000059436	Ensembl Gene Model	MGI:96921	Max	Max protein	protein coding gene	12	-	76984043	77008975	17187
ENSMUSG00000059486	Ensembl Gene Model	MGI:2384811	Kbtbd2	kelch repeat and BTB (POZ) domain containing 2	protein coding gene	6	-	56754510	56774798	210973
ENSMUSG00000059708	Ensembl Gene Model	MGI:2443758	Akap17b	A kinase (PRKA) anchor protein 17B	protein coding gene	X	-	35871967	35909048	338351
ENSMUSG00000059857	Ensembl Gene Model	MGI:1934028	Ntng1	netrin G1	protein coding gene	3	-	109687356	110051327	80883
ENSMUSG00000059890	Ensembl Gene Model	MGI:2154580	Ube4a	ubiquitination factor E4A	protein coding gene	9	-	44834425	44876898	140630
ENSMUSG00000059923	Ensembl Gene Model	MGI:95805	Grb2	growth factor receptor bound protein 2	protein coding gene	11	-	115534871	115599423	14784
ENSMUSG00000059981	Ensembl Gene Model	MGI:1915919	Taok2	TAO kinase 2	protein coding gene	7	-	126464850	126483875	381921
ENSMUSG00000060314	Ensembl Gene Model	MGI:3039601	Zfp941	zinc finger protein 941	protein coding gene	7	-	140387362	140402091	407812
ENSMUSG00000060397	Ensembl Gene Model	MGI:2389445	Zfp128	zinc finger protein 128	protein coding gene	7	+	12615105	12627349	243833
ENSMUSG00000060427	Ensembl Gene Model	MGI:2142546	Zfp868	zinc finger protein 868	protein coding gene	8	-	70063508	70078199	234362
ENSMUSG00000060639	Ensembl Gene Model	MGI:2448432	H4c9	H4 clustered histone 9	protein coding gene	13	-	22225130	22225532	319158
ENSMUSG00000060671	Ensembl Gene Model	MGI:1859660	Atp8b2	ATPase, class I, type 8B, member 2	protein coding gene	3	-	89846795	89870645	54667
ENSMUSG00000060708	Ensembl Gene Model	MGI:1929230	Bloc1s4	biogenesis of lysosomal organelles complex-1, subunit 4, cappuccino	protein coding gene	5	-	36904722	36905994	117197
ENSMUSG00000061288	Ensembl Gene Model	MGI:3041177	Taok3	TAO kinase 3	protein coding gene	5	+	117258194	117413284	330177
ENSMUSG00000061313	Ensembl Gene Model	MGI:1919358	Ddhd2	DDHD domain containing 2	protein coding gene	8	-	26215351	26244502	72108
ENSMUSG00000061371	Ensembl Gene Model	MGI:3040689	Zfp873	zinc finger protein 873	protein coding gene	10	+	81883957	81900579	408062
ENSMUSG00000061410	Ensembl Gene Model	MGI:2159407	Zcchc14	zinc finger, CCHC domain containing 14	protein coding gene	8	-	122325442	122379640	142682
ENSMUSG00000061462	Ensembl Gene Model	MGI:2681862	Obscn	obscurin, cytoskeletal calmodulin and titin-interacting RhoGEF	protein coding gene	11	-	58885082	59027201	380698
ENSMUSG00000061527	Ensembl Gene Model	MGI:96702	Krt5	keratin 5	protein coding gene	15	-	101615505	101621333	110308
ENSMUSG00000061533	Ensembl Gene Model	MGI:1922466	Cep128	centrosomal protein 128	protein coding gene	12	-	90965266	91351183	75216
ENSMUSG00000061589	Ensembl Gene Model	MGI:2143886	Dot1l	DOT1-like, histone H3 methyltransferase (S. cerevisiae)	protein coding gene	10	+	80591040	80631295	208266
ENSMUSG00000061859	Ensembl Gene Model	MGI:1277960	Patj	PATJ, crumbs cell polarity complex component	protein coding gene	4	+	98284022	98607840	12695
ENSMUSG00000061894	Ensembl Gene Model	MGI:2679268	Zscan20	zinc finger and SCAN domains 20	protein coding gene	4	-	128477332	128503891	269585
ENSMUSG00000061898	Ensembl Gene Model	MGI:1927369	Rbak	RB-associated KRAB zinc finger	protein coding gene	5	-	143157941	143166530	57782
ENSMUSG00000062202	Ensembl Gene Model	MGI:1916625	Btbd9	BTB (POZ) domain containing 9	protein coding gene	17	-	30434498	30795462	224671
ENSMUSG00000062519	Ensembl Gene Model	MGI:1917856	Zfp398	zinc finger protein 398	protein coding gene	6	+	47812595	47850471	272347
ENSMUSG00000062591	Ensembl Gene Model	MGI:107848	Tubb4a	tubulin, beta 4A class IVA	protein coding gene	17	-	57387061	57394600	22153
ENSMUSG00000062627	Ensembl Gene Model	MGI:2444584	Mysm1	myb-like, SWIRM and MPN domains 1	protein coding gene	4	-	94830277	94867337	320713
ENSMUSG00000062794	Ensembl Gene Model	MGI:2679006	Zfp599	zinc finger protein 599	protein coding gene	9	-	22158726	22171191	235048
ENSMUSG00000062822	Ensembl Gene Model	MGI:1914642	4833420G17Rik	RIKEN cDNA 4833420G17 gene	protein coding gene	13	+	119599304	119622656	67392
ENSMUSG00000062901	Ensembl Gene Model	MGI:1923035	Klhl24	kelch-like 24	protein coding gene	16	+	19916292	19947971	75785
ENSMUSG00000063060	Ensembl Gene Model	MGI:98369	Sox7	SRY (sex determining region Y)-box 7	protein coding gene	14	+	64181155	64188181	20680
ENSMUSG00000063108	Ensembl Gene Model	MGI:99173	Zfp26	zinc finger protein 26	protein coding gene	9	-	20339745	20371458	22688
ENSMUSG00000063268	Ensembl Gene Model	MGI:3712326	Parp10	poly (ADP-ribose) polymerase family, member 10	protein coding gene	15	-	76117195	76127640	671535
ENSMUSG00000063410	Ensembl Gene Model	MGI:2385007	Stk24	serine/threonine kinase 24	protein coding gene	14	-	121523755	121617423	223255
ENSMUSG00000063800	Ensembl Gene Model	MGI:1916962	Prpf38a	PRP38 pre-mRNA processing factor 38 (yeast) domain containing A	protein coding gene	4	-	108422064	108436533	230596
ENSMUSG00000063888	Ensembl Gene Model	MGI:1913479	Rpl7l1	ribosomal protein L7-like 1	protein coding gene	17	-	47084833	47093582	66229
ENSMUSG00000063889	Ensembl Gene Model	MGI:88495	Crem	cAMP responsive element modulator	protein coding gene	18	-	3266048	3337748	12916
ENSMUSG00000064293	Ensembl Gene Model	MGI:1095737	Cntn4	contactin 4	protein coding gene	6	+	105654621	106676271	269784
ENSMUSG00000064329	Ensembl Gene Model	MGI:98246	Scn1a	sodium channel, voltage-gated, type I, alpha	protein coding gene	2	-	66101125	66271181	20265
ENSMUSG00000066000	Ensembl Gene Model	MGI:2148252	Zfp979	zinc finger protein 979	protein coding gene	4	-	147696394	147726970	112422
ENSMUSG00000066037	Ensembl Gene Model	MGI:1891692	Hnrnpr	heterogeneous nuclear ribonucleoprotein R	protein coding gene	4	+	136038253	136086758	74326
ENSMUSG00000066415	Ensembl Gene Model	MGI:1925103	Msl2	MSL complex subunit 2	protein coding gene	9	+	100956154	100981999	77853
ENSMUSG00000066515	Ensembl Gene Model	MGI:97322	Klk1b3	kallikrein 1-related peptidase b3	protein coding gene	7	+	43847615	43851775	18050
ENSMUSG00000066720	Ensembl Gene Model	MGI:1913100	Cldn9	claudin 9	protein coding gene	17	-	23901558	23903000	56863
ENSMUSG00000066735	Ensembl Gene Model	MGI:1916818	Vkorc1l1	vitamin K epoxide reductase complex, subunit 1-like 1	protein coding gene	5	+	129970950	130015533	69568
ENSMUSG00000066760	Ensembl Gene Model	MGI:1347249	Psg16	pregnancy specific beta-1-glycoprotein 16	protein coding gene	7	+	16807965	16867375	26436
ENSMUSG00000066797	Ensembl Gene Model	MGI:2685049	Zfp648	zinc finger protein 648	protein coding gene	1	+	154076933	154081435	100503355
ENSMUSG00000066798	Ensembl Gene Model	MGI:2442998	Zbtb6	zinc finger and BTB domain containing 6	protein coding gene	2	-	37315512	37320931	241322
ENSMUSG00000066877	Ensembl Gene Model	MGI:1306821	Nck2	non-catalytic region of tyrosine kinase adaptor protein 2	protein coding gene	1	+	43484643	43609678	17974
ENSMUSG00000067028	Ensembl Gene Model	MGI:3664583	Cntnap5b	contactin associated protein-like 5B	protein coding gene	1	+	99700490	100413667	241175
ENSMUSG00000067424	Ensembl Gene Model	MGI:2677168	Zfp563	zinc finger protein 563	protein coding gene	17	+	33308284	33329679	240068
ENSMUSG00000067430	Ensembl Gene Model	MGI:1920701	Zfp763	zinc finger protein 763	protein coding gene	17	-	33235838	33252355	73451
ENSMUSG00000067818	Ensembl Gene Model	MGI:2138915	Myl9	myosin, light polypeptide 9, regulatory	protein coding gene	2	+	156617340	156623578	98932
ENSMUSG00000067873	Ensembl Gene Model	MGI:1919709	Htatsf1	HIV TAT specific factor 1	protein coding gene	X	+	56098943	56112543	72459
ENSMUSG00000067889	Ensembl Gene Model	MGI:1313261	Sptbn2	spectrin beta, non-erythrocytic 2	protein coding gene	19	+	4761195	4802388	20743
ENSMUSG00000068015	Ensembl Gene Model	MGI:2443390	Lrch1	leucine-rich repeats and calponin homology (CH) domain containing 1	protein coding gene	14	-	74992115	75185316	380916
ENSMUSG00000068134	Ensembl Gene Model	MGI:1345179	Zfp120	zinc finger protein 120	protein coding gene	2	-	149956327	149978598	104348
ENSMUSG00000068154	Ensembl Gene Model	MGI:1859980	Insm1	insulinoma-associated 1	protein coding gene	2	+	146063917	146066940	53626
ENSMUSG00000068267	Ensembl Gene Model	MGI:88376	Cenpb	centromere protein B	protein coding gene	2	-	131019209	131021987	12616
ENSMUSG00000068854	Ensembl Gene Model	MGI:2448415	H2bc21	H2B clustered histone 21	protein coding gene	3	+	96128435	96131054	319190
ENSMUSG00000069114	Ensembl Gene Model	MGI:2139883	Zbtb10	zinc finger and BTB domain containing 10	protein coding gene	3	+	9315662	9350393	229055
ENSMUSG00000069135	Ensembl Gene Model	MGI:1922546	Cep43	centrosomal protein 43	protein coding gene	17	+	8384333	8415636	75296
ENSMUSG00000069495	Ensembl Gene Model	MGI:1278321	Epc2	enhancer of polycomb homolog 2	protein coding gene	2	+	49341498	49441954	227867
ENSMUSG00000069727	Ensembl Gene Model	MGI:3648690	Zfp975	zinc finger protein 975	protein coding gene	7	-	42309529	42342166	434179
ENSMUSG00000069793	Ensembl Gene Model	MGI:2445121	Slfn9	schlafen 9	protein coding gene	11	-	82869216	82882656	237886
ENSMUSG00000069895	Ensembl Gene Model	MGI:3694797	Atxn1l	ataxin 1-like	protein coding gene	8	-	110453083	110464371	52335
ENSMUSG00000070348	Ensembl Gene Model	MGI:88313	Ccnd1	cyclin D1	protein coding gene	7	-	144483668	144493568	12443
ENSMUSG00000070847	Ensembl Gene Model	MGI:1316729	Vmn2r30	vomeronasal 2, receptor 30	protein coding gene	7	-	7314722	7340530	22306
ENSMUSG00000071172	Ensembl Gene Model	MGI:98285	Srsf3	serine and arginine-rich splicing factor 3	protein coding gene	17	+	29251634	29262346	20383
ENSMUSG00000071573	Ensembl Gene Model	MGI:1915045	Rnls	renalase, FAD-dependent amine oxidase	polymorphic pseudogene	19	-	33115147	33369695	67795
ENSMUSG00000071723	Ensembl Gene Model	MGI:1316727	Gspt2	G1 to S phase transition 2	protein coding gene	X	+	93679675	93682168	14853
ENSMUSG00000072294	Ensembl Gene Model	MGI:1333796	Klf12	Kruppel-like factor 12	protein coding gene	14	-	100108068	100522115	16597
ENSMUSG00000072501	Ensembl Gene Model	MGI:2444412	Phf20l1	PHD finger protein 20-like 1	protein coding gene	15	+	66449349	66518892	239510
ENSMUSG00000072653	Ensembl Gene Model	MGI:3040704	Zfp783	zinc finger protein 783	pseudogene	6	+	47920109	47931483	232785
ENSMUSG00000072762	Ensembl Gene Model	MGI:1925270	4930522L14Rik	RIKEN cDNA 4930522L14 gene	protein coding gene	5	-	109883856	109899752	100041734
ENSMUSG00000072774	Ensembl Gene Model	MGI:2441896	Zfp951	zinc finger protein 951	protein coding gene	5	-	104961035	105007936	626391
ENSMUSG00000073147	Ensembl Gene Model	MGI:1923227	5031425E22Rik	RIKEN cDNA 5031425E22 gene	lncRNA gene	5	-	23587306	23639267	269630
ENSMUSG00000073236	Ensembl Gene Model	MGI:1919576	2500004C02Rik	RIKEN cDNA 2500004C02 gene	lncRNA gene	2	-	153183077	153187730	72326
ENSMUSG00000073434	Ensembl Gene Model	MGI:1921267	Wdr90	WD repeat domain 90	protein coding gene	17	-	26063745	26080475	106618
ENSMUSG00000073700	Ensembl Gene Model	MGI:1919288	Klhl21	kelch-like 21	protein coding gene	4	+	152093348	152102134	242785
ENSMUSG00000073915	Ensembl Gene Model	MGI:3030510	Or52e7	olfactory receptor family 52 subfamily E member 7	protein coding gene	7	+	104680774	104685360	259099
ENSMUSG00000074158	Ensembl Gene Model	MGI:3036263	Zfp976	zinc finger protein 976	protein coding gene	7	-	42258950	42292012	208111
ENSMUSG00000074283	Ensembl Gene Model	MGI:1929099	Zfp109	zinc finger protein 109	protein coding gene	7	-	23926997	23936985	56869
ENSMUSG00000074415	Ensembl Gene Model	MGI:1920394	Mir100hg	Mir100 Mirlet7a-2 Mir125b-1 cluster host gene	lncRNA gene	9	+	41287822	41526481	73144
ENSMUSG00000074733	Ensembl Gene Model	MGI:2652824	Zfp950	zinc finger protein 950	protein coding gene	19	-	61042278	61129278	414758
ENSMUSG00000074748	Ensembl Gene Model	MGI:1914971	Atxn7l3b	ataxin 7-like 3B	protein coding gene	10	-	112761335	112764906	382423
ENSMUSG00000074881	Ensembl Gene Model	MGI:105109	Mageb3	MAGE family member B3	protein coding gene	2	-	121784252	121786573	17147
ENSMUSG00000074968	Ensembl Gene Model	MGI:3613666	Ano3	anoctamin 3	protein coding gene	2	-	110485546	110780854	228432
ENSMUSG00000075273	Ensembl Gene Model	MGI:1919671	Ttc30b	tetratricopeptide repeat domain 30B	protein coding gene	2	-	75766193	75768806	72421
ENSMUSG00000075284	Ensembl Gene Model	MGI:2178801	Wipf1	WAS/WASL interacting protein family, member 1	protein coding gene	2	-	73259954	73359831	215280
ENSMUSG00000075307	Ensembl Gene Model	MGI:2683854	Klhl41	kelch-like 41	protein coding gene	2	+	69500464	69514574	228003
ENSMUSG00000075316	Ensembl Gene Model	MGI:107636	Scn9a	sodium channel, voltage-gated, type IX, alpha	protein coding gene	2	-	66310424	66465306	20274
ENSMUSG00000075334	Ensembl Gene Model	MGI:1915124	Rprm	reprimo, TP53 dependent G2 arrest mediator candidate	protein coding gene	2	-	53974105	53975564	67874
ENSMUSG00000076431	Ensembl Gene Model	MGI:98366	Sox4	SRY (sex determining region Y)-box 4	protein coding gene	13	-	29132902	29137682	20677
ENSMUSG00000076498	Ensembl Gene Model	MGI:4835227	Trbc2	T cell receptor beta, constant 2	gene segment	6	+	41523664	41525115	100125263
ENSMUSG00000078161	Ensembl Gene Model	MGI:1919095	Erich3	glutamate rich 3	protein coding gene	3	+	154416770	154454649	209601
ENSMUSG00000078435	Ensembl Gene Model	MGI:2143755	AU041133	expressed sequence AU041133	protein coding gene	10	+	81963847	81988899	216177
ENSMUSG00000078515	Ensembl Gene Model	MGI:1917244	Ddi2	DNA-damage inducible protein 2	protein coding gene	4	-	141410874	141450730	68817
ENSMUSG00000078584	Ensembl Gene Model	MGI:2140466	AU022252	expressed sequence AU022252	protein coding gene	4	-	119078576	119089985	230696
ENSMUSG00000078851	Ensembl Gene Model	MGI:2448458	H2aw	H2A.W histone	protein coding gene	11	+	58845511	58846018	319162
ENSMUSG00000078894	Ensembl Gene Model	MGI:1924208	2210418O10Rik	RIKEN cDNA 2210418O10 gene	protein coding gene	2	+	175968362	175982121	100504263
ENSMUSG00000078899	Ensembl Gene Model	MGI:3782813	Gm4631	predicted gene 4631	protein coding gene	2	-	175163748	175179990	102633156
ENSMUSG00000079104	Ensembl Gene Model	MGI:3779453	Prps1l3	phosphoribosyl pyrophosphate synthetase 1-like 3	protein coding gene	12	+	57277198	57286668	328099
ENSMUSG00000079179	Ensembl Gene Model	MGI:1921423	Rab10os	RAB10, member RAS oncogene family, opposite strand	antisense lncRNA gene	12	+	3285791	3300374	74173
ENSMUSG00000079317	Ensembl Gene Model	MGI:1913476	Trappc2	trafficking protein particle complex 2	protein coding gene	X	+	165223747	165236136	66226
ENSMUSG00000079499	Ensembl Gene Model	MGI:1923470	6530402F18Rik	RIKEN cDNA 6530402F18 gene	lncRNA gene	2	-	29135128	29143005	76220
ENSMUSG00000079710	Ensembl Gene Model	MGI:3809205	Dynlt2a2	dynein light chain Tctex-type 2A2	protein coding gene	17	-	15216045	15230446	100041639
ENSMUSG00000080316	Ensembl Gene Model	MGI:1922452	Spaca6	sperm acrosome associated 6	protein coding gene	17	+	18047420	18063271	75202
ENSMUSG00000081058	Ensembl Gene Model	MGI:2448357	H3c15	H3 clustered histone 15	protein coding gene	3	-	96145795	96146443	97114
ENSMUSG00000081809	Ensembl Gene Model	MGI:3782987	Gm15539	predicted gene 15539	pseudogene	16	+	3745501	3746030	100416290
ENSMUSG00000082229	Ensembl Gene Model	MGI:106654	Nap1l2	nucleosome assembly protein 1-like 2	protein coding gene	X	-	102227782	102230246	17954
ENSMUSG00000083013	Ensembl Gene Model	MGI:3705382	Gm12978	predicted gene 12978	pseudogene	4	-	131630101	131630622	100418326
ENSMUSG00000083307	Ensembl Gene Model	MGI:3035137	AA414768	expressed sequence AA414768	pseudogene	X	+	12803111	12804367	245350
ENSMUSG00000084897	Ensembl Gene Model	MGI:3649244	Gm14226	predicted gene 14226	protein coding gene	2	+	154860186	154869024	100462662
ENSMUSG00000085037	Ensembl Gene Model	MGI:1918323	4933421O10Rik	RIKEN cDNA 4933421O10 gene	lncRNA gene	4	-	33027142	33031323	100504166
ENSMUSG00000085667	Ensembl Gene Model	MGI:3702644	Gm12992	predicted gene 12992	lncRNA gene	4	-	131626789	131647340	545681
ENSMUSG00000085998	Ensembl Gene Model	MGI:2148030	AW822252	expressed sequence AW822252	lncRNA gene	X	-	52698889	52718545	331578
ENSMUSG00000086022	Ensembl Gene Model	MGI:3644580	Rad51ap2	RAD51 associated protein 2	protein coding gene	12	+	11506080	11512929	209550
ENSMUSG00000086118	Ensembl Gene Model	MGI:3651156	Gm14169	predicted gene 14169	lncRNA gene	2	-	156451126	156455342	100504350
ENSMUSG00000086429	Ensembl Gene Model	MGI:104735	Gt(ROSA)26Sor	gene trap ROSA 26, Philippe Soriano	lncRNA gene	6	-	113044389	113054205	14910
ENSMUSG00000086657	Ensembl Gene Model	MGI:1918207	Stamos	signal transducing adaptor molecule (SH3 domain and ITAM motif) 1, opposite strand	lncRNA gene	2	-	14075144	14078745	70957
ENSMUSG00000086714	Ensembl Gene Model	MGI:3698435	0610009E02Rik	RIKEN cDNA 0610009E02 gene	lncRNA gene	2	+	26335936	26349402	100125929
ENSMUSG00000087050	Ensembl Gene Model	MGI:1924478	Dhrs13os	dehydrogenase/reductase (SDR family) member 13, opposite strand	antisense lncRNA gene	11	-	77920838	77923491	100504178
ENSMUSG00000087132	Ensembl Gene Model	MGI:2441838	A930001C03Rik	RIKEN cDNA A930001C03 gene	lncRNA gene	19	+	4489351	4498353	319314
ENSMUSG00000087305	Ensembl Gene Model	MGI:2443789	A430035B10Rik	RIKEN cDNA A430035B10 gene	lncRNA gene	6	-	8507059	8509161	320312
ENSMUSG00000087479	Ensembl Gene Model	MGI:4439759	Gm16835	predicted gene, 16835	lncRNA gene	14	+	119336377	119352486	102635192
ENSMUSG00000087497	Ensembl Gene Model	MGI:1913706	2810001G20Rik	RIKEN cDNA 2810001G20 gene	lncRNA gene	11	+	63970310	63974085	66456
ENSMUSG00000089706	Ensembl Gene Model	MGI:1925853	B230216N24Rik	RIKEN cDNA B230216N24 gene	lncRNA gene	1	-	97958848	97975518	78603
ENSMUSG00000089824	Ensembl Gene Model	MGI:1922960	Rbm12	RNA binding motif protein 12	protein coding gene	2	-	155936802	155953885	75710
ENSMUSG00000089857	Ensembl Gene Model	MGI:3642748	Zfp882	zinc finger protein 882	protein coding gene	8	+	72662452	72670198	382019
ENSMUSG00000090112	Ensembl Gene Model	MGI:1917581	Shprh	SNF2 histone linker PHD RING helicase	protein coding gene	10	+	11025171	11093339	268281
ENSMUSG00000090223	Ensembl Gene Model	MGI:97509	Pcp4	Purkinje cell protein 4	protein coding gene	16	+	96268806	96326993	18546
ENSMUSG00000090641	Ensembl Gene Model	MGI:1925501	Zfp712	zinc finger protein 712	protein coding gene	13	-	67186660	67209234	78251
ENSMUSG00000091337	Ensembl Gene Model	MGI:1889651	Eid1	EP300 interacting inhibitor of differentiation 1	protein coding gene	2	+	125515015	125516705	58521
ENSMUSG00000092035	Ensembl Gene Model	MGI:2157785	Peg10	paternally expressed 10	protein coding gene	6	+	4747306	4760517	170676
ENSMUSG00000092094	Ensembl Gene Model	MGI:2685287	Zfp804b	zinc finger protein 804B	protein coding gene	5	-	6819030	7394378	207618
ENSMUSG00000092274	Ensembl Gene Model	MGI:1914211	Neat1	nuclear paraspeckle assembly transcript 1 (non-protein coding)	lncRNA gene	19	-	5874736	5895506	66961
ENSMUSG00000092416	Ensembl Gene Model	MGI:3584269	Zfp141	zinc finger protein 141	protein coding gene	7	-	42122810	42155164	434178
ENSMUSG00000094483	Ensembl Gene Model	MGI:1338779	Purb	purine rich element binding protein B	protein coding gene	11	-	6417599	6425917	19291
ENSMUSG00000094595	Ensembl Gene Model	MGI:5301008	Fsbp	fibrinogen silencer binding protein	protein coding gene	4	+	11579665	11587591	100503583
ENSMUSG00000094870	Ensembl Gene Model	MGI:1919715	Zfp131	zinc finger protein 131	protein coding gene	13	-	120226723	120252425	72465
ENSMUSG00000095115	Ensembl Gene Model	MGI:2442416	Itpripl2	inositol 1,4,5-triphosphate receptor interacting protein-like 2	protein coding gene	7	-	118084334	118091198	319622
ENSMUSG00000095253	Ensembl Gene Model	MGI:2443934	Zfp799	zinc finger protein 799	protein coding gene	17	-	33034423	33049235	240064
ENSMUSG00000096795	Ensembl Gene Model	MGI:1920860	Zfp433	zinc finger protein 433	protein coding gene	10	+	81540581	81562021	73610
ENSMUSG00000096910	Ensembl Gene Model	MGI:4834573	Zfp955b	zinc finger protein 955B	protein coding gene	17	+	33508518	33526215	100043468
ENSMUSG00000097049	Ensembl Gene Model	MGI:1915041	6530411M01Rik	RIKEN cDNA 6530411M01 gene	lncRNA gene	17	-	9366551	9386668	67791
ENSMUSG00000097133	Ensembl Gene Model	MGI:5477122	Gm26628	predicted gene, 26628	lncRNA gene	6	-	71938129	71940759	102632638
ENSMUSG00000097182	Ensembl Gene Model	MGI:2443762	A830009L08Rik	RIKEN cDNA A830009L08 gene	lncRNA gene	13	-	91517109	91536204	320297
ENSMUSG00000097333	Ensembl Gene Model	MGI:107768	Zfp87	zinc finger protein 87	protein coding gene	13	-	67663900	67674296	170763
ENSMUSG00000097383	Ensembl Gene Model	MGI:1916252	1500026H17Rik	RIKEN cDNA 1500026H17 gene	lncRNA gene	10	+	89522233	89536728	69002
ENSMUSG00000097391	Ensembl Gene Model	MGI:3781106	Mirg	miRNA containing gene	lncRNA gene	12	+	109701415	109715892	100040724
ENSMUSG00000097392	Ensembl Gene Model	MGI:3040669	Thoc2l	THO complex subunit 2-like	protein coding gene	5	+	104656216	104702073	100042165
ENSMUSG00000098090	Ensembl Gene Model	MGI:1924272	2700099C18Rik	RIKEN cDNA 2700099C18 gene	pseudogene	17	+	95057528	95082557	77022
ENSMUSG00000099632	Ensembl Gene Model	MGI:1915287	2900093K20Rik	RIKEN cDNA 2900093K20 gene	lncRNA gene	2	+	163261715	163262281	108168734
ENSMUSG00000099881	Ensembl Gene Model	MGI:1914456	2810013P06Rik	RIKEN cDNA 2810013P06 gene	lncRNA gene	8	+	123769314	123771341	100503178
ENSMUSG00000100252	Ensembl Gene Model	MGI:1917691	Mir124-2hg	Mir124-2 host gene (non-protein coding)	lncRNA gene	3	+	17844085	17854235	70441
ENSMUSG00000101013	Ensembl Gene Model	MGI:2444702	A630072M18Rik	RIKEN cDNA A630072M18 gene	lncRNA gene	5	+	21155987	21161396	320770
ENSMUSG00000101942	Ensembl Gene Model	MGI:5011767	Gm19582	predicted gene, 19582	lncRNA gene	1	-	87781069	87782021	100503175
ENSMUSG00000102428	Ensembl Gene Model	MGI:1935229	Pcdhga12	protocadherin gamma subfamily A, 12	protein coding gene	18	+	37898633	37974926	93724
ENSMUSG00000102440	Ensembl Gene Model	MGI:1935226	Pcdhga9	protocadherin gamma subfamily A, 9	protein coding gene	18	+	37869989	37974916	93717
ENSMUSG00000102748	Ensembl Gene Model	MGI:1935170	Pcdhgb2	protocadherin gamma subfamily B, 2	protein coding gene	18	+	37822912	37974925	93700
ENSMUSG00000102918	Ensembl Gene Model	MGI:1935201	Pcdhgc3	protocadherin gamma subfamily C, 3	protein coding gene	18	+	37939463	37974926	93706
ENSMUSG00000103567	Ensembl Gene Model	MGI:1935217	Pcdhga5	protocadherin gamma subfamily A, 5	protein coding gene	18	+	37827433	37974926	93713
ENSMUSG00000103585	Ensembl Gene Model	MGI:1935173	Pcdhgb4	protocadherin gamma subfamily B, 4	protein coding gene	18	+	37853429	37974923	93701
ENSMUSG00000103695	Ensembl Gene Model	MGI:2444280	A830029E22Rik	RIKEN cDNA A830029E22 gene	lncRNA gene	3	+	81709332	81712468	320566
ENSMUSG00000103749	Ensembl Gene Model	MGI:1935196	Pcdhgb5	protocadherin gamma subfamily B, 5	protein coding gene	18	+	37864062	37974926	93702
ENSMUSG00000103793	Ensembl Gene Model	MGI:1935218	Pcdhga6	protocadherin gamma subfamily A, 6	protein coding gene	18	+	37840154	37974923	93714
ENSMUSG00000104346	Ensembl Gene Model	MGI:1935215	Pcdhga3	protocadherin gamma subfamily A, 3	protein coding gene	18	+	37807388	37974926	93711
ENSMUSG00000105686	Ensembl Gene Model	MGI:5594553	Gm35394	predicted gene, 35394	lncRNA gene	5	+	99421954	99427143	102638959
ENSMUSG00000105960	Ensembl Gene Model	MGI:2441710	6330410L21Rik	RIKEN cDNA 6330410L21 gene	lncRNA gene	3	+	129547407	129557531	319224
ENSMUSG00000106379	Ensembl Gene Model	MGI:1925076	Lhfpl3	lipoma HMGIC fusion partner-like 3	protein coding gene	5	+	22951057	23480595	269629
ENSMUSG00000106847	Ensembl Gene Model	MGI:2663476	Peg13	paternally expressed 13	lncRNA gene	15	-	72677451	72682173	353342
ENSMUSG00000107741	Ensembl Gene Model	MGI:3780180	Gm2011	predicted gene 2011	pseudogene	3	+	40801391	40822276	100039027
ENSMUSG00000108348	Ensembl Gene Model	MGI:5625257	Pnma8c	PNMA family member 8C	protein coding gene	7	+	16717008	16722071	105247240
ENSMUSG00000109901	Ensembl Gene Model	MGI:1914314	Chmp1b	charged multivesicular body protein 1B	protein coding gene	18	+	67338437	67340960	67064
ENSMUSG00000110444	Ensembl Gene Model	MGI:3642803	Gm10033	predicted gene 10033	protein coding gene	8	-	69821180	69848196	378466
ENSMUSG00000111027	Ensembl Gene Model	MGI:3781159	Gm2981	predicted gene 2981	pseudogene	9	-	74968636	74969329	100040812
ENSMUSG00000111063	Ensembl Gene Model	MGI:3645415	Zfp660	zinc finger protein 660	protein coding gene	9	+	122732311	122743219	666257
ENSMUSG00000112160	Ensembl Gene Model	MGI:2670978	BC024063	cDNA sequence BC024063	protein coding gene	10	+	81919187	81947050	666584
ENSMUSG00000113450	Ensembl Gene Model	MGI:1918758	Zfp935	zinc finger protein 935	protein coding gene	13	-	62600830	62614626	71508
ENSMUSG00000113919	Ensembl Gene Model	MGI:5593625	Gm34466	predicted gene, 34466	lncRNA gene	13	-	45400108	45421187	102637730
ENSMUSG00000114004	Ensembl Gene Model	MGI:6098105	Gm48552	predicted gene, 48552	protein coding gene	10	+	81226151	81227389	117934532
ENSMUSG00000116275	Ensembl Gene Model	MGI:1917829	Zc3h11a	zinc finger CCCH type containing 11A	protein coding gene	1	-	133547600	133589137	70579
ENSMUSG00000116802	Ensembl Gene Model	MGI:3646034	Gm5165	predicted gene 5165	lncRNA gene	17	+	17455134	17486325	102640673
ENSMUSG00000117011	Ensembl Gene Model	MGI:3584523	E130008D07Rik	RIKEN cDNA E130008D07 gene	lncRNA gene	17	-	43456932	43469182	545207
ENSMUSG00000117183	Ensembl Gene Model	MGI:5012193	Gm20008	predicted gene, 20008	pseudogene	17	-	22932847	22935918	100504002
ENSMUSG00000117231	Ensembl Gene Model	MGI:5624494	Gm41609	predicted gene, 41609	lncRNA gene	17	-	71072834	71113054	105246306

## Sheet: Broad Signature Genes - Down
Input	Input Type	MGI Gene/Marker ID	Symbol	Name	Feature Type	Chr	Strand	Start	End	Entrez Gene ID
ENSMUSG00000000001	Ensembl Gene Model	MGI:95773	Gnai3	guanine nucleotide binding protein (G protein), alpha inhibiting 3	protein coding gene	3	-	108014596	108053462	14679
ENSMUSG00000000056	Ensembl Gene Model	MGI:1914858	Narf	nuclear prelamin A recognition factor	protein coding gene	11	+	121128079	121146682	67608
ENSMUSG00000000126	Ensembl Gene Model	MGI:2446084	Wnt9a	wingless-type MMTV integration site family, member 9A	protein coding gene	11	+	59197754	59224378	216795
ENSMUSG00000000149	Ensembl Gene Model	MGI:95767	Gna12	guanine nucleotide binding protein, alpha 12	protein coding gene	5	-	140745699	140816186	14673
ENSMUSG00000000202	Ensembl Gene Model	MGI:1919264	Btbd17	BTB (POZ) domain containing 17	protein coding gene	11	-	114682043	114686771	72014
ENSMUSG00000000305	Ensembl Gene Model	MGI:99218	Cdh4	cadherin 4	protein coding gene	2	+	179084224	179541166	12561
ENSMUSG00000000326	Ensembl Gene Model	MGI:88470	Comt	catechol-O-methyltransferase	protein coding gene	16	-	18225636	18245602	12846
ENSMUSG00000000346	Ensembl Gene Model	MGI:1344344	Dazap2	DAZ associated protein 2	protein coding gene	15	+	100513543	100518642	23994
ENSMUSG00000000378	Ensembl Gene Model	MGI:2384924	Ccm2	cerebral cavernous malformation 2	protein coding gene	11	+	6496887	6546744	216527
ENSMUSG00000000489	Ensembl Gene Model	MGI:97528	Pdgfb	platelet derived growth factor, B polypeptide	protein coding gene	15	-	79880075	79899178	18591
ENSMUSG00000000555	Ensembl Gene Model	MGI:96604	Itga5	integrin alpha 5 (fibronectin receptor alpha)	protein coding gene	15	-	103252713	103275190	16402
ENSMUSG00000000594	Ensembl Gene Model	MGI:95762	Gm2a	GM2 ganglioside activator protein	protein coding gene	11	+	54988941	55003855	14667
ENSMUSG00000000753	Ensembl Gene Model	MGI:108080	Serpinf1	serine (or cysteine) peptidase inhibitor, clade F, member 1	protein coding gene	11	-	75300855	75313449	20317
ENSMUSG00000000805	Ensembl Gene Model	MGI:1096574	Car4	carbonic anhydrase 4	protein coding gene	11	+	84848612	84856870	12351
ENSMUSG00000000884	Ensembl Gene Model	MGI:1338057	Gnb1l	guanine nucleotide binding protein (G protein), beta polypeptide 1-like	protein coding gene	16	+	18317463	18385429	13972
ENSMUSG00000001034	Ensembl Gene Model	MGI:1346347	Mapk7	mitogen-activated protein kinase 7	protein coding gene	11	-	61379638	61385101	23939
ENSMUSG00000001053	Ensembl Gene Model	MGI:2442218	N4bp3	NEDD4 binding protein 3	protein coding gene	11	-	51533890	51541669	212706
ENSMUSG00000001119	Ensembl Gene Model	MGI:88459	Col6a1	collagen, type VI, alpha 1	protein coding gene	10	-	76544626	76561878	12833
ENSMUSG00000001143	Ensembl Gene Model	MGI:2443010	Lman2l	lectin, mannose-binding 2-like	protein coding gene	1	-	36458952	36484352	214895
ENSMUSG00000001175	Ensembl Gene Model	MGI:88251	Calm1	calmodulin 1	protein coding gene	12	+	100165694	100176073	12313
ENSMUSG00000001211	Ensembl Gene Model	MGI:1336186	Agpat3	1-acylglycerol-3-phosphate O-acyltransferase 3	protein coding gene	10	-	78105012	78188323	28169
ENSMUSG00000001334	Ensembl Gene Model	MGI:1917614	Fndc5	fibronectin type III domain containing 5	protein coding gene	4	+	129030792	129038386	384061
ENSMUSG00000001436	Ensembl Gene Model	MGI:103182	Slc19a1	solute carrier family 19 (folate transporter), member 1	protein coding gene	10	+	76868103	76886266	20509
ENSMUSG00000001507	Ensembl Gene Model	MGI:96602	Itga3	integrin alpha 3	protein coding gene	11	-	94935300	94967627	16400
ENSMUSG00000001555	Ensembl Gene Model	MGI:104769	Fkbp10	FK506 binding protein 10	protein coding gene	11	+	100306523	100315650	14230
ENSMUSG00000001576	Ensembl Gene Model	MGI:1914708	Ergic1	endoplasmic reticulum-golgi intermediate compartment (ERGIC) 1	protein coding gene	17	+	26780463	26875908	67458
ENSMUSG00000001642	Ensembl Gene Model	MGI:1353494	Akr1b3	aldo-keto reductase family 1, member B3 (aldose reductase)	protein coding gene	6	-	34280865	34294424	11677
ENSMUSG00000001707	Ensembl Gene Model	MGI:1913393	Eef1e1	eukaryotic translation elongation factor 1 epsilon 1	protein coding gene	13	-	38829667	38843004	66143
ENSMUSG00000001751	Ensembl Gene Model	MGI:1351641	Naglu	alpha-N-acetylglucosaminidase (Sanfilippo disease IIIB)	protein coding gene	11	+	100960859	100968498	27419
ENSMUSG00000001763	Ensembl Gene Model	MGI:1919012	Tspan33	tetraspanin 33	protein coding gene	6	+	29694221	29718558	232670
ENSMUSG00000001864	Ensembl Gene Model	MGI:1919598	Aif1l	allograft inflammatory factor 1-like	protein coding gene	2	+	31840315	31863454	108897
ENSMUSG00000001918	Ensembl Gene Model	MGI:105305	Slc1a5	solute carrier family 1 (neutral amino acid transporter), member 5	protein coding gene	7	+	16515265	16532199	20514
ENSMUSG00000001942	Ensembl Gene Model	MGI:104803	Siae	sialic acid acetylesterase	protein coding gene	9	+	37525117	37559554	22619
ENSMUSG00000002058	Ensembl Gene Model	MGI:1328357	Unc119	unc-119 lipid binding chaperone	protein coding gene	11	+	78234321	78239990	22248
ENSMUSG00000002068	Ensembl Gene Model	MGI:88316	Ccne1	cyclin E1	protein coding gene	7	-	37797409	37806915	12447
ENSMUSG00000002103	Ensembl Gene Model	MGI:87882	Acp2	acid phosphatase 2, lysosomal	protein coding gene	2	+	91033230	91044443	11432
ENSMUSG00000002190	Ensembl Gene Model	MGI:107472	Clgn	calmegin	protein coding gene	8	+	84116496	84155181	12745
ENSMUSG00000002222	Ensembl Gene Model	MGI:1915727	Rmnd5a	required for meiotic nuclear division 5 homolog A	protein coding gene	6	-	71365618	71417621	68477
ENSMUSG00000002266	Ensembl Gene Model	MGI:1341879	Zim1	zinc finger, imprinted 1	protein coding gene	7	-	6677443	6699521	22776
ENSMUSG00000002279	Ensembl Gene Model	MGI:1923733	Lmf1	lipase maturation factor 1	protein coding gene	17	+	25798059	25881800	76483
ENSMUSG00000002289	Ensembl Gene Model	MGI:1888999	Angptl4	angiopoietin-like 4	protein coding gene	17	-	33993874	34000549	57875
ENSMUSG00000002319	Ensembl Gene Model	MGI:1923001	Ipo4	importin 4	protein coding gene	14	-	55862857	55873321	75751
ENSMUSG00000002332	Ensembl Gene Model	MGI:1196314	Dhrs1	dehydrogenase/reductase (SDR family) member 1	protein coding gene	14	-	55976477	55983147	52585
ENSMUSG00000002346	Ensembl Gene Model	MGI:1920345	Slc25a42	solute carrier family 25, member 42	protein coding gene	8	-	70636990	70664931	73095
ENSMUSG00000002458	Ensembl Gene Model	MGI:1915153	Rgs19	regulator of G-protein signaling 19	protein coding gene	2	-	181330212	181335770	56470
ENSMUSG00000002578	Ensembl Gene Model	MGI:1343139	Ikzf4	IKAROS family zinc finger 4	protein coding gene	10	-	128466712	128505227	22781
ENSMUSG00000002602	Ensembl Gene Model	MGI:1347244	Axl	AXL receptor tyrosine kinase	protein coding gene	7	-	25456698	25488130	26362
ENSMUSG00000002608	Ensembl Gene Model	MGI:1196455	Ccdc97	coiled-coil domain containing 97	protein coding gene	7	-	25410537	25418460	52132
ENSMUSG00000002625	Ensembl Gene Model	MGI:1860606	Akap8l	A kinase (PRKA) anchor protein 8-like	protein coding gene	17	-	32540398	32569581	54194
ENSMUSG00000002661	Ensembl Gene Model	MGI:1913650	Alkbh7	alkB homolog 7	protein coding gene	17	+	57304339	57306322	66400
ENSMUSG00000002688	Ensembl Gene Model	MGI:99879	Prkd1	protein kinase D1	protein coding gene	12	-	50388014	50695881	18760
ENSMUSG00000002731	Ensembl Gene Model	MGI:1344375	Prkra	protein kinase, interferon inducible double stranded RNA dependent activator	protein coding gene	2	-	76460242	76478359	23992
ENSMUSG00000002771	Ensembl Gene Model	MGI:95823	Grin2d	glutamate receptor, ionotropic, NMDA2D (epsilon 4)	protein coding gene	7	-	45481307	45520708	14814
ENSMUSG00000002781	Ensembl Gene Model	MGI:1917459	Tmem143	transmembrane protein 143	protein coding gene	7	+	45546403	45566837	70209
ENSMUSG00000002812	Ensembl Gene Model	MGI:1342286	Flii	flightless I actin binding protein	protein coding gene	11	-	60604969	60618089	14248
ENSMUSG00000002900	Ensembl Gene Model	MGI:96743	Lamb1	laminin B1	protein coding gene	12	+	31315233	31379643	16777
ENSMUSG00000002908	Ensembl Gene Model	MGI:1933993	Kcnn1	potassium intermediate/small conductance calcium-activated channel, subfamily N, member 1	protein coding gene	8	-	71294693	71315902	84036
ENSMUSG00000002910	Ensembl Gene Model	MGI:1918057	Arrdc2	arrestin domain containing 2	protein coding gene	8	-	71287773	71292364	70807
ENSMUSG00000002944	Ensembl Gene Model	MGI:107899	Cd36	CD36 molecule	protein coding gene	5	-	17986688	18093799	12491
ENSMUSG00000002981	Ensembl Gene Model	MGI:1927155	Clptm1	cleft lip and palate associated transmembrane protein 1	protein coding gene	7	-	19365505	19398955	56457
ENSMUSG00000002985	Ensembl Gene Model	MGI:88057	Apoe	apolipoprotein E	protein coding gene	7	-	19430034	19433113	11816
ENSMUSG00000003123	Ensembl Gene Model	MGI:96790	Lipe	lipase, hormone sensitive	protein coding gene	7	-	25078952	25097911	16890
ENSMUSG00000003153	Ensembl Gene Model	MGI:95757	Slc2a3	solute carrier family 2 (facilitated glucose transporter), member 3	protein coding gene	6	-	122704768	122778599	20527
ENSMUSG00000003199	Ensembl Gene Model	MGI:1915297	Mpnd	MPN domain containing	protein coding gene	17	+	56316201	56323790	68047
ENSMUSG00000003227	Ensembl Gene Model	MGI:1343498	Edar	ectodysplasin-A receptor	protein coding gene	10	-	58436611	58511476	13608
ENSMUSG00000003233	Ensembl Gene Model	MGI:108100	Dvl3	dishevelled segment polarity protein 3	protein coding gene	16	+	20335732	20352760	13544
ENSMUSG00000003235	Ensembl Gene Model	MGI:2446176	Eif2b5	eukaryotic translation initiation factor 2B, subunit 5 epsilon	protein coding gene	16	+	20317567	20328073	224045
ENSMUSG00000003344	Ensembl Gene Model	MGI:1933831	Btbd2	BTB (POZ) domain containing 2	protein coding gene	10	-	80478457	80492328	208198
ENSMUSG00000003363	Ensembl Gene Model	MGI:1333782	Pld3	phospholipase D family, member 3	protein coding gene	7	-	27231425	27252643	18807
ENSMUSG00000003420	Ensembl Gene Model	MGI:103017	Fcgrt	Fc fragment of IgG receptor and transporter	protein coding gene	7	-	44742417	44753246	14132
ENSMUSG00000003421	Ensembl Gene Model	MGI:1913644	Nosip	nitric oxide synthase interacting protein	protein coding gene	7	+	44711853	44727634	66394
ENSMUSG00000003469	Ensembl Gene Model	MGI:1860417	Phyhip	phytanoyl-CoA hydroxylase interacting protein	protein coding gene	14	+	70694957	70706266	105653
ENSMUSG00000003581	Ensembl Gene Model	MGI:1918923	Rnf215	ring finger protein 215	protein coding gene	11	+	4085202	4091172	71673
ENSMUSG00000003657	Ensembl Gene Model	MGI:101914	Calb2	calbindin 2	protein coding gene	8	-	110869158	110894844	12308
ENSMUSG00000003680	Ensembl Gene Model	MGI:2444957	Taf6l	TATA-box binding protein associated factor 6 like	protein coding gene	19	-	8751851	8763781	225895
ENSMUSG00000003813	Ensembl Gene Model	MGI:105126	Rad23a	RAD23 homolog A, nucleotide excision repair protein	protein coding gene	8	-	85561540	85567361	19358
ENSMUSG00000003865	Ensembl Gene Model	MGI:101805	Gys1	glycogen synthase 1, muscle	protein coding gene	7	+	45084268	45106043	14936
ENSMUSG00000003934	Ensembl Gene Model	MGI:109196	Efnb3	ephrin B3	protein coding gene	11	-	69444918	69451031	13643
ENSMUSG00000003949	Ensembl Gene Model	MGI:96108	Hlf	hepatic leukemia factor	protein coding gene	11	-	90227362	90281721	217082
ENSMUSG00000003992	Ensembl Gene Model	MGI:1914220	Ssbp2	single-stranded DNA binding protein 2	protein coding gene	13	+	91608402	91851548	66970
ENSMUSG00000004031	Ensembl Gene Model	MGI:2443333	Brinp2	bone morphogenic protein/retinoic acid inducible neural-specific 2	protein coding gene	1	-	158072839	158183896	240843
ENSMUSG00000004056	Ensembl Gene Model	MGI:104874	Akt2	thymoma viral proto-oncogene 2	protein coding gene	7	+	27290977	27340251	11652
ENSMUSG00000004069	Ensembl Gene Model	MGI:1933786	Dnaja3	DnaJ heat shock protein family (Hsp40) member A3	protein coding gene	16	+	4501934	4525559	83945
ENSMUSG00000004264	Ensembl Gene Model	MGI:102520	Phb2	prohibitin 2	protein coding gene	6	+	124689299	124693913	12034
ENSMUSG00000004267	Ensembl Gene Model	MGI:95394	Eno2	enolase 2, gamma neuronal	protein coding gene	6	-	124737016	124746636	13807
ENSMUSG00000004366	Ensembl Gene Model	MGI:98326	Sst	somatostatin	protein coding gene	16	-	23708323	23709708	20604
ENSMUSG00000004415	Ensembl Gene Model	MGI:2155345	Col26a1	collagen, type XXVI, alpha 1	protein coding gene	5	-	136770613	136912063	140709
ENSMUSG00000004446	Ensembl Gene Model	MGI:108093	Bid	BH3 interacting domain death agonist	protein coding gene	6	-	120870080	120894074	12122
ENSMUSG00000004451	Ensembl Gene Model	MGI:1927244	Ralb	v-ral simian leukemia viral oncogene B	protein coding gene	1	-	119398035	119432512	64143
ENSMUSG00000004530	Ensembl Gene Model	MGI:1345964	Coro1c	coronin, actin binding protein 1C	protein coding gene	5	-	113980500	114046767	23790
ENSMUSG00000004558	Ensembl Gene Model	MGI:1352498	Ndrg2	N-myc downstream regulated gene 2	protein coding gene	14	-	52142728	52151461	29811
ENSMUSG00000004610	Ensembl Gene Model	MGI:106098	Etfb	electron transferring flavoprotein, beta polypeptide	protein coding gene	7	+	43093507	43107224	110826
ENSMUSG00000004631	Ensembl Gene Model	MGI:1329042	Sgce	sarcoglycan, epsilon	protein coding gene	6	-	4674350	4747204	20392
ENSMUSG00000004633	Ensembl Gene Model	MGI:1917243	Chn2	chimerin 2	protein coding gene	6	+	54016917	54278797	69993
ENSMUSG00000004637	Ensembl Gene Model	MGI:1931237	Wwox	WW domain-containing oxidoreductase	protein coding gene	8	+	115166395	116079447	80707
ENSMUSG00000004748	Ensembl Gene Model	MGI:1916686	Mtfp1	mitochondrial fission process 1	protein coding gene	11	-	4041481	4045431	67900
ENSMUSG00000004789	Ensembl Gene Model	MGI:1926170	Dlst	dihydrolipoamide S-succinyltransferase (E2 component of 2-oxo-glutarate complex)	protein coding gene	12	+	85157597	85180865	78920
ENSMUSG00000004865	Ensembl Gene Model	MGI:106908	Srpk1	serine/arginine-rich protein specific kinase 1	protein coding gene	17	-	28806622	28841683	20815
ENSMUSG00000004892	Ensembl Gene Model	MGI:1096385	Bcan	brevican	protein coding gene	3	-	87894838	87907537	12032
ENSMUSG00000005043	Ensembl Gene Model	MGI:1350341	Sgsh	N-sulfoglucosamine sulfohydrolase (sulfamidase)	protein coding gene	11	-	119234315	119246336	27029
ENSMUSG00000005125	Ensembl Gene Model	MGI:1341799	Ndrg1	N-myc downstream regulated gene 1	protein coding gene	15	-	66801167	66841489	17988
ENSMUSG00000005338	Ensembl Gene Model	MGI:2137858	Cadm3	cell adhesion molecule 3	protein coding gene	1	-	173160825	173195261	94332
ENSMUSG00000005674	Ensembl Gene Model	MGI:3589112	Tomm40l	translocase of outer mitochondrial membrane 40-like	protein coding gene	1	-	171045371	171050083	641376
ENSMUSG00000005813	Ensembl Gene Model	MGI:1922874	Metap1	methionyl aminopeptidase 1	protein coding gene	3	-	138164721	138195143	75624
ENSMUSG00000005873	Ensembl Gene Model	MGI:1270152	Reep5	receptor accessory protein 5	protein coding gene	18	-	34477938	34507123	13476
ENSMUSG00000005958	Ensembl Gene Model	MGI:104770	Ephb3	Eph receptor B3	protein coding gene	16	+	21023505	21042055	13845
ENSMUSG00000005973	Ensembl Gene Model	MGI:104559	Rcn1	reticulocalbin 1	protein coding gene	2	-	105216636	105229664	19672
ENSMUSG00000005982	Ensembl Gene Model	MGI:1922013	Naa60	N(alpha)-acetyltransferase 60, NatF catalytic subunit	protein coding gene	16	+	3690365	3722645	74763
ENSMUSG00000006050	Ensembl Gene Model	MGI:1344414	Sra1	steroid receptor RNA activator 1	protein coding gene	18	-	36800240	36803364	24068
ENSMUSG00000006205	Ensembl Gene Model	MGI:1929076	Htra1	HtrA serine peptidase 1	protein coding gene	7	+	130537933	130587388	56213
ENSMUSG00000006218	Ensembl Gene Model	MGI:2685539	Fam131c	family with sequence similarity 131, member C	protein coding gene	4	+	141095531	141111486	277743
ENSMUSG00000006362	Ensembl Gene Model	MGI:1338013	Cbfa2t3	CBFA2/RUNX1 translocation partner 3	protein coding gene	8	-	123351880	123425848	12398
ENSMUSG00000006378	Ensembl Gene Model	MGI:1349389	Gcat	glycine C-acetyltransferase (2-amino-3-ketobutyrate-coenzyme A ligase)	protein coding gene	15	+	78915074	78926731	26912
ENSMUSG00000006392	Ensembl Gene Model	MGI:1915269	Med8	mediator complex subunit 8	protein coding gene	4	+	118266534	118272979	80509
ENSMUSG00000006517	Ensembl Gene Model	MGI:2179327	Mvd	mevalonate (diphospho) decarboxylase	protein coding gene	8	-	123160340	123170161	192156
ENSMUSG00000006589	Ensembl Gene Model	MGI:88061	Aprt	adenine phosphoribosyl transferase	protein coding gene	8	-	123301376	123303646	11821
ENSMUSG00000006641	Ensembl Gene Model	MGI:2660847	Slc5a6	solute carrier family 5 (sodium-dependent vitamin transporter), member 6	protein coding gene	5	-	31193380	31206268	330064
ENSMUSG00000006731	Ensembl Gene Model	MGI:1342057	B4galnt1	beta-1,4-N-acetyl-galactosaminyl transferase 1	protein coding gene	10	+	127001094	127008199	14421
ENSMUSG00000006800	Ensembl Gene Model	MGI:1919293	Sulf2	sulfatase 2	protein coding gene	2	-	165915819	165997603	72043
ENSMUSG00000006930	Ensembl Gene Model	MGI:1261831	Hap1	huntingtin-associated protein 1	protein coding gene	11	-	100238153	100246954	15114
ENSMUSG00000007029	Ensembl Gene Model	MGI:90675	Vars	valyl-tRNA synthetase	protein coding gene	17	+	35219963	35235298	22321
ENSMUSG00000007097	Ensembl Gene Model	MGI:88106	Atp1a2	ATPase, Na+/K+ transporting, alpha 2 polypeptide	protein coding gene	1	-	172099276	172125631	98660
ENSMUSG00000007216	Ensembl Gene Model	MGI:2683557	Zfp775	zinc finger protein 775	protein coding gene	6	+	48578937	48598482	243372
ENSMUSG00000007476	Ensembl Gene Model	MGI:2652847	Lrrc8a	leucine rich repeat containing 8A VRAC subunit A	protein coding gene	2	+	30127781	30153802	241296
ENSMUSG00000007646	Ensembl Gene Model	MGI:2150020	Rad51c	RAD51 paralog C	protein coding gene	11	-	87267471	87295780	114714
ENSMUSG00000007655	Ensembl Gene Model	MGI:102709	Cav1	caveolin 1, caveolae protein	protein coding gene	6	+	17306287	17341327	12389
ENSMUSG00000007682	Ensembl Gene Model	MGI:1338833	Dio2	deiodinase, iodothyronine, type II	protein coding gene	12	-	90691326	90705212	13371
ENSMUSG00000007908	Ensembl Gene Model	MGI:2446108	Hmgcll1	3-hydroxymethyl-3-methylglutaryl-Coenzyme A lyase-like 1	protein coding gene	9	+	75922137	76043632	208982
ENSMUSG00000008035	Ensembl Gene Model	MGI:1915291	Mid1ip1	Mid1 interacting protein 1 (gastrulation specific G12-like (zebrafish))	protein coding gene	X	+	10583604	10585941	68041
ENSMUSG00000008318	Ensembl Gene Model	MGI:2443373	Relt	RELT tumor necrosis factor receptor	protein coding gene	7	-	100495054	100512653	320100
ENSMUSG00000008429	Ensembl Gene Model	MGI:1915393	Herpud2	HERPUD family member 2	protein coding gene	9	-	25019428	25063116	80517
ENSMUSG00000008658	Ensembl Gene Model	MGI:1926224	Rbfox1	RNA binding protein, fox-1 homolog (C. elegans) 1	protein coding gene	16	+	5703219	7229390	268859
ENSMUSG00000008855	Ensembl Gene Model	MGI:1333784	Hdac5	histone deacetylase 5	protein coding gene	11	-	102086573	102120998	15184
ENSMUSG00000008859	Ensembl Gene Model	MGI:1927243	Rala	v-ral simian leukemia viral oncogene A (ras related)	protein coding gene	13	-	18055160	18118802	56044
ENSMUSG00000008892	Ensembl Gene Model	MGI:106922	Vdac3	voltage-dependent anion channel 3	protein coding gene	8	-	23067091	23083829	22335
ENSMUSG00000008999	Ensembl Gene Model	MGI:103302	Bmp7	bone morphogenetic protein 7	protein coding gene	2	-	172709805	172782114	12162
ENSMUSG00000009035	Ensembl Gene Model	MGI:2445179	Tmem184b	transmembrane protein 184b	protein coding gene	15	-	79244884	79287503	223693
ENSMUSG00000009216	Ensembl Gene Model	MGI:1926106	Fam163b	family with sequence similarity 163, member B	protein coding gene	2	-	27000391	27032489	109349
ENSMUSG00000009291	Ensembl Gene Model	MGI:2652132	Pttg1ip	pituitary tumor-transforming 1 interacting protein	protein coding gene	10	+	77417554	77434566	108705
ENSMUSG00000009563	Ensembl Gene Model	MGI:1353596	Tor2a	torsin family 2, member A	protein coding gene	2	+	32647246	32652256	30933
ENSMUSG00000009630	Ensembl Gene Model	MGI:1321161	Ppp2cb	protein phosphatase 2 (formerly 2A), catalytic subunit, beta isoform	protein coding gene	8	+	34089653	34109469	19053
ENSMUSG00000009647	Ensembl Gene Model	MGI:3026965	Mcu	mitochondrial calcium uniporter	protein coding gene	10	-	59282806	59452514	215999
ENSMUSG00000009863	Ensembl Gene Model	MGI:1914930	Sdhb	succinate dehydrogenase complex, subunit B, iron sulfur (Ip)	protein coding gene	4	+	140688582	140706509	67680
ENSMUSG00000010025	Ensembl Gene Model	MGI:1353452	Aldh3a2	aldehyde dehydrogenase family 3, subfamily A2	protein coding gene	11	-	61114243	61158290	11671
ENSMUSG00000010064	Ensembl Gene Model	MGI:1923507	Slc38a3	solute carrier family 38, member 3	protein coding gene	9	-	107528353	107546167	76257
ENSMUSG00000010066	Ensembl Gene Model	MGI:1929813	Cacna2d2	calcium channel, voltage-dependent, alpha 2/delta subunit 2	protein coding gene	9	+	107276948	107406545	56808
ENSMUSG00000010095	Ensembl Gene Model	MGI:96955	Slc3a2	solute carrier family 3 (activators of dibasic and neutral amino acid transport), member 2	protein coding gene	19	-	8684246	8700733	17254
ENSMUSG00000010362	Ensembl Gene Model	MGI:1913849	Rdm1	RAD52 motif 1	protein coding gene	11	+	101518021	101526926	66599
ENSMUSG00000010663	Ensembl Gene Model	MGI:1923517	Fads1	fatty acid desaturase 1	protein coding gene	19	+	10160252	10174241	76267
ENSMUSG00000010936	Ensembl Gene Model	MGI:2157980	Vac14	Vac14 homolog (S. cerevisiae)	protein coding gene	8	+	111345217	111447030	234729
ENSMUSG00000011114	Ensembl Gene Model	MGI:1100877	Tbrg1	transforming growth factor beta regulated gene 1	protein coding gene	9	-	37560478	37568608	21376
ENSMUSG00000011752	Ensembl Gene Model	MGI:97552	Pgam1	phosphoglycerate mutase 1	protein coding gene	19	+	41900362	41907099	18648
ENSMUSG00000011837	Ensembl Gene Model	MGI:1914861	Snapc2	small nuclear RNA activating complex, polypeptide 2	protein coding gene	8	+	4303102	4306220	102209
ENSMUSG00000011884	Ensembl Gene Model	MGI:1929253	Gltp	glycolipid transfer protein	protein coding gene	5	-	114807551	114828996	56356
ENSMUSG00000012076	Ensembl Gene Model	MGI:1196337	Brms1l	breast cancer metastasis-suppressor 1-like	protein coding gene	12	+	55883109	55916521	52592
ENSMUSG00000012123	Ensembl Gene Model	MGI:1334463	Crybg2	crystallin beta-gamma domain containing 2	protein coding gene	4	+	133788126	133819815	230806
ENSMUSG00000012483	Ensembl Gene Model	MGI:1915490	Rpa3	replication protein A3	protein coding gene	6	-	8255936	8259141	68240
ENSMUSG00000013275	Ensembl Gene Model	MGI:2444823	Slc41a1	solute carrier family 41, member 1	protein coding gene	1	+	131755236	131776601	98396
ENSMUSG00000013367	Ensembl Gene Model	MGI:2686277	Iglon5	IgLON family member 5	protein coding gene	7	-	43122328	43139499	210094
ENSMUSG00000013698	Ensembl Gene Model	MGI:104799	Pea15a	proliferation and apoptosis adaptor protein 15A	protein coding gene	1	-	172024295	172034371	18611
ENSMUSG00000013787	Ensembl Gene Model	MGI:2148922	Ehmt2	euchromatic histone lysine N-methyltransferase 2	protein coding gene	17	+	35117445	35133028	110147
ENSMUSG00000014353	Ensembl Gene Model	MGI:1919727	Tmem87b	transmembrane protein 87B	protein coding gene	2	+	128660038	128696181	72477
ENSMUSG00000014444	Ensembl Gene Model	MGI:3603204	Piezo1	piezo-type mechanosensitive ion channel component 1	protein coding gene	8	-	123208437	123278068	234839
ENSMUSG00000014601	Ensembl Gene Model	MGI:2443884	Strip1	striatin interacting protein 1	protein coding gene	3	-	107519848	107539010	229707
ENSMUSG00000014786	Ensembl Gene Model	MGI:2685542	Slc9a5	solute carrier family 9 (sodium/hydrogen exchanger), member 5	protein coding gene	8	+	106075475	106096513	277973
ENSMUSG00000014813	Ensembl Gene Model	MGI:109131	Stc1	stanniocalcin 1	protein coding gene	14	+	69266738	69278850	20855
ENSMUSG00000014846	Ensembl Gene Model	MGI:1915221	Tppp3	tubulin polymerization-promoting protein family member 3	protein coding gene	8	-	106194125	106198158	67971
ENSMUSG00000014959	Ensembl Gene Model	MGI:2135962	Gorasp2	golgi reassembly stacking protein 2	protein coding gene	2	+	70491520	70522069	70231
ENSMUSG00000015085	Ensembl Gene Model	MGI:1096863	Entpd2	ectonucleoside triphosphate diphosphohydrolase 2	protein coding gene	2	+	25285886	25291333	12496
ENSMUSG00000015095	Ensembl Gene Model	MGI:1354731	Fbxw5	F-box and WD-40 domain protein 5	protein coding gene	2	+	25390762	25395482	30839
ENSMUSG00000015134	Ensembl Gene Model	MGI:1861722	Aldh1a3	aldehyde dehydrogenase family 1, subfamily A3	protein coding gene	7	-	66040640	66077225	56847
ENSMUSG00000015217	Ensembl Gene Model	MGI:1098219	Hmgb3	high mobility group box 3	protein coding gene	X	+	70599523	70604279	15354
ENSMUSG00000015247	Ensembl Gene Model	MGI:1913786	Nipsnap3b	nipsnap homolog 3B	protein coding gene	4	+	53011880	53022060	66536
ENSMUSG00000015289	Ensembl Gene Model	MGI:1913442	Lage3	L antigen family, member 3	protein coding gene	X	-	73395768	73397224	66192
ENSMUSG00000015335	Ensembl Gene Model	MGI:1913470	Zdhhc12	zinc finger, DHHC domain containing 12	protein coding gene	2	-	29980956	29983647	66220
ENSMUSG00000015568	Ensembl Gene Model	MGI:96820	Lpl	lipoprotein lipase	protein coding gene	8	+	69333207	69359584	16956
ENSMUSG00000015656	Ensembl Gene Model	MGI:105384	Hspa8	heat shock protein 8	protein coding gene	9	+	40712572	40716498	15481
ENSMUSG00000015668	Ensembl Gene Model	MGI:1919871	Pdzd11	PDZ domain containing 11	protein coding gene	X	-	99666489	99670174	72621
ENSMUSG00000015755	Ensembl Gene Model	MGI:1915902	Tab2	TGF-beta activated kinase 1/MAP3K7 binding protein 2	protein coding gene	10	-	7781417	7831994	68652
ENSMUSG00000015776	Ensembl Gene Model	MGI:98446	Med22	mediator complex subunit 22	protein coding gene	2	-	26795279	26800654	20933
ENSMUSG00000015806	Ensembl Gene Model	MGI:97836	Qdpr	quinoid dihydropteridine reductase	protein coding gene	5	-	45591374	45607571	110391
ENSMUSG00000015879	Ensembl Gene Model	MGI:2442958	Fam184b	family with sequence similarity 184, member B	protein coding gene	5	-	45687047	45796843	58227
ENSMUSG00000015980	Ensembl Gene Model	MGI:1923862	Lrrc27	leucine rich repeat containing 27	protein coding gene	7	+	138792904	138822895	76612
ENSMUSG00000015981	Ensembl Gene Model	MGI:2385336	Stk32c	serine/threonine kinase 32C	protein coding gene	7	-	138683554	138793223	57740
ENSMUSG00000016028	Ensembl Gene Model	MGI:1100883	Celsr1	cadherin, EGF LAG seven-pass G-type receptor 1	protein coding gene	15	-	85783130	85918404	12614
ENSMUSG00000016179	Ensembl Gene Model	MGI:2388073	Camk1g	calcium/calmodulin-dependent protein kinase I gamma	protein coding gene	1	-	193028654	193052606	215303
ENSMUSG00000016520	Ensembl Gene Model	MGI:2155959	Lnx2	ligand of numb-protein X 2	protein coding gene	5	-	146953465	147013385	140887
ENSMUSG00000016554	Ensembl Gene Model	MGI:1933181	Eif3d	eukaryotic translation initiation factor 3, subunit D	protein coding gene	15	-	77843198	77855013	55944
ENSMUSG00000016763	Ensembl Gene Model	MGI:1890616	Scube1	signal peptide, CUB domain, EGF-like 1	protein coding gene	15	-	83489200	83609222	64706
ENSMUSG00000017009	Ensembl Gene Model	MGI:1349164	Sdc4	syndecan 4	protein coding gene	2	-	164266167	164285512	20971
ENSMUSG00000017144	Ensembl Gene Model	MGI:1921444	Rnd3	Rho family GTPase 3	protein coding gene	2	-	51020451	51039123	74194
ENSMUSG00000017167	Ensembl Gene Model	MGI:1858201	Cntnap1	contactin associated protein-like 1	protein coding gene	11	+	101065429	101081550	53321
ENSMUSG00000017314	Ensembl Gene Model	MGI:1858257	Mpp2	membrane protein, palmitoylated 2 (MAGUK p55 subfamily member 2)	protein coding gene	11	-	101947841	101979341	50997
ENSMUSG00000017390	Ensembl Gene Model	MGI:101863	Aldoc	aldolase C, fructose-bisphosphate	protein coding gene	11	+	78213899	78218607	11676
ENSMUSG00000017466	Ensembl Gene Model	MGI:98753	Timp2	tissue inhibitor of metalloproteinase 2	protein coding gene	11	-	118191887	118246237	21858
ENSMUSG00000017493	Ensembl Gene Model	MGI:96439	Igfbp4	insulin-like growth factor binding protein 4	protein coding gene	11	+	98930820	98943481	16010
ENSMUSG00000017664	Ensembl Gene Model	MGI:2385166	Slc35c2	solute carrier family 35, member C2	protein coding gene	2	-	165118474	165129789	228875
ENSMUSG00000017670	Ensembl Gene Model	MGI:2153045	Elmo2	engulfment and cell motility 2	protein coding gene	2	-	165129951	165168399	140579
ENSMUSG00000017718	Ensembl Gene Model	MGI:2448704	Afmid	arylformamidase	protein coding gene	11	+	117716750	117730734	71562
ENSMUSG00000017747	Ensembl Gene Model	MGI:1931556	Ghdc	GH3 domain containing	protein coding gene	11	-	100656858	100661783	80860
ENSMUSG00000017760	Ensembl Gene Model	MGI:97748	Ctsa	cathepsin A	protein coding gene	2	+	164674793	164682952	19025
ENSMUSG00000017765	Ensembl Gene Model	MGI:1309465	Slc12a4	solute carrier family 12, member 4	protein coding gene	8	-	106670222	106692729	20498
ENSMUSG00000017943	Ensembl Gene Model	MGI:2385163	Gdap1l1	ganglioside-induced differentiation-associated protein 1-like 1	protein coding gene	2	+	163280396	163297244	228858
ENSMUSG00000018217	Ensembl Gene Model	MGI:97631	Pmp22	peripheral myelin protein 22	protein coding gene	11	+	63019808	63050373	18858
ENSMUSG00000018398	Ensembl Gene Model	MGI:894310	Septin8	septin 8	protein coding gene	11	+	53410224	53440432	20362
ENSMUSG00000018401	Ensembl Gene Model	MGI:2180699	Mtmr4	myotubularin related protein 4	protein coding gene	11	+	87482988	87507128	170749
ENSMUSG00000018405	Ensembl Gene Model	MGI:2443470	Mrm1	mitochondrial rRNA methyltransferase 1	protein coding gene	11	-	84703887	84710341	217038
ENSMUSG00000018417	Ensembl Gene Model	MGI:107752	Myo1b	myosin IB	protein coding gene	1	-	51788917	51955143	17912
ENSMUSG00000018459	Ensembl Gene Model	MGI:2149635	Slc13a3	solute carrier family 13 (sodium-dependent dicarboxylate transporter), member 3	protein coding gene	2	-	165247215	165315117	114644
ENSMUSG00000018470	Ensembl Gene Model	MGI:1336208	Kcnab3	potassium voltage-gated channel, shaker-related subfamily, beta member 3	protein coding gene	11	+	69217084	69223867	16499
ENSMUSG00000018500	Ensembl Gene Model	MGI:99403	Adora2b	adenosine A2b receptor	protein coding gene	11	+	62139810	62157278	11541
ENSMUSG00000018634	Ensembl Gene Model	MGI:88498	Crhr1	corticotropin releasing hormone receptor 1	protein coding gene	11	+	104023681	104066349	12921
ENSMUSG00000018677	Ensembl Gene Model	MGI:1196386	Slc25a39	solute carrier family 25, member 39	protein coding gene	11	-	102293811	102298772	68066
ENSMUSG00000018736	Ensembl Gene Model	MGI:1932915	Ndel1	nudE neurodevelopment protein 1 like 1	protein coding gene	11	-	68712260	68743961	83431
ENSMUSG00000018906	Ensembl Gene Model	MGI:894286	P4ha2	procollagen-proline, 2-oxoglutarate 4-dioxygenase (proline 4-hydroxylase), alpha II polypeptide	protein coding gene	11	+	53991750	54022494	18452
ENSMUSG00000018999	Ensembl Gene Model	MGI:1931249	Slc35b4	solute carrier family 35, member B4	protein coding gene	6	-	34130357	34154012	58246
ENSMUSG00000019066	Ensembl Gene Model	MGI:97844	Rab3d	RAB3D, member RAS oncogene family	protein coding gene	9	-	21818787	21829488	19340
ENSMUSG00000019082	Ensembl Gene Model	MGI:1915517	Slc25a22	solute carrier family 25 (mitochondrial carrier, glutamate), member 22	protein coding gene	7	-	141009662	141017787	68267
ENSMUSG00000019359	Ensembl Gene Model	MGI:1918834	Gdpd2	glycerophosphodiester phosphodiesterase domain containing 2	protein coding gene	X	+	99773479	99782501	71584
ENSMUSG00000019528	Ensembl Gene Model	MGI:1351614	Gyg	glycogenin	protein coding gene	3	-	20176247	20209281	27357
ENSMUSG00000019558	Ensembl Gene Model	MGI:2147834	Slc6a8	solute carrier family 6 (neurotransmitter transporter, creatine), member 8	protein coding gene	X	+	72716756	72726108	102857
ENSMUSG00000019699	Ensembl Gene Model	MGI:1345147	Akt3	thymoma viral proto-oncogene 3	protein coding gene	1	-	176847639	177085769	23797
ENSMUSG00000019731	Ensembl Gene Model	MGI:2142403	Slc35e1	solute carrier family 35, member E1	protein coding gene	8	-	73234485	73246458	270066
ENSMUSG00000019762	Ensembl Gene Model	MGI:1917587	Iyd	iodotyrosine deiodinase	protein coding gene	10	+	3490274	3504880	70337
ENSMUSG00000019796	Ensembl Gene Model	MGI:2442989	Lrp11	low density lipoprotein receptor-related protein 11	protein coding gene	10	+	7465564	7501247	237253
ENSMUSG00000019806	Ensembl Gene Model	MGI:1913503	Aig1	androgen-induced 1	protein coding gene	10	-	13522798	13744724	66253
ENSMUSG00000019843	Ensembl Gene Model	MGI:95602	Fyn	Fyn proto-oncogene	protein coding gene	10	+	39245735	39441377	14360
ENSMUSG00000019863	Ensembl Gene Model	MGI:1923813	Qrsl1	glutaminyl-tRNA synthase (glutamine-hydrolyzing)-like 1	protein coding gene	10	-	43750184	43777741	76563
ENSMUSG00000019864	Ensembl Gene Model	MGI:2178759	Rtn4ip1	reticulon 4 interacting protein 1	protein coding gene	10	+	43777772	43823860	170728
ENSMUSG00000019920	Ensembl Gene Model	MGI:1195263	Lims1	LIM and senescent cell antigen-like domains 1	protein coding gene	10	+	58159288	58260513	110829
ENSMUSG00000019929	Ensembl Gene Model	MGI:94872	Dcn	decorin	protein coding gene	10	+	97315471	97354005	13179
ENSMUSG00000019960	Ensembl Gene Model	MGI:1914853	Dusp6	dual specificity phosphatase 6	protein coding gene	10	+	99099093	99103351	67603
ENSMUSG00000020027	Ensembl Gene Model	MGI:1201787	Socs2	suppressor of cytokine signaling 2	protein coding gene	10	-	95221224	95253042	216233
ENSMUSG00000020037	Ensembl Gene Model	MGI:1918387	Rfx4	regulatory factor X, 4 (influences HLA class II expression)	protein coding gene	10	+	84591926	84742402	71137
ENSMUSG00000020038	Ensembl Gene Model	MGI:1270841	Cry1	cryptochrome 1 (photolyase-like)	protein coding gene	10	-	84967564	85020918	12952
ENSMUSG00000020042	Ensembl Gene Model	MGI:1921257	Btbd11	BTB (POZ) domain containing 11	protein coding gene	10	+	85222678	85496156	74007
ENSMUSG00000020044	Ensembl Gene Model	MGI:98754	Timp3	tissue inhibitor of metalloproteinase 3	protein coding gene	10	+	86136276	86185369	21859
ENSMUSG00000020053	Ensembl Gene Model	MGI:96432	Igf1	insulin-like growth factor 1	protein coding gene	10	+	87694127	87772904	16000
ENSMUSG00000020069	Ensembl Gene Model	MGI:1926462	Hnrnph3	heterogeneous nuclear ribonucleoprotein H3	protein coding gene	10	-	62850443	62859764	432467
ENSMUSG00000020089	Ensembl Gene Model	MGI:97831	Ppa1	pyrophosphatase (inorganic) 1	protein coding gene	10	+	61484400	61509944	67895
ENSMUSG00000020092	Ensembl Gene Model	MGI:1351623	Pald1	phosphatase domain containing, paladin 1	protein coding gene	10	-	61155435	61219309	27355
ENSMUSG00000020097	Ensembl Gene Model	MGI:1261415	Sgpl1	sphingosine phosphate lyase 1	protein coding gene	10	-	60934421	60983463	20397
ENSMUSG00000020099	Ensembl Gene Model	MGI:894703	Unc5b	unc-5 netrin receptor B	protein coding gene	10	-	60598373	60667360	107449
ENSMUSG00000020107	Ensembl Gene Model	MGI:1289325	Anapc16	anaphase promoting complex subunit 16	protein coding gene	10	-	59823231	59838957	52717
ENSMUSG00000020108	Ensembl Gene Model	MGI:1921997	Ddit4	DNA-damage-inducible transcript 4	protein coding gene	10	-	59785497	59787592	74747
ENSMUSG00000020111	Ensembl Gene Model	MGI:2384909	Micu1	mitochondrial calcium uptake 1	protein coding gene	10	+	59538385	59699956	216001
ENSMUSG00000020123	Ensembl Gene Model	MGI:1859216	Avpr1a	arginine vasopressin receptor 1A	protein coding gene	10	+	122284404	122289357	54140
ENSMUSG00000020183	Ensembl Gene Model	MGI:1917824	Cpm	carboxypeptidase M	protein coding gene	10	+	117465405	117523257	70574
ENSMUSG00000020235	Ensembl Gene Model	MGI:1926790	Fzr1	fizzy and cell division cycle 20 related 1	protein coding gene	10	-	81202713	81214204	56371
ENSMUSG00000020256	Ensembl Gene Model	MGI:2444680	Aldh1l2	aldehyde dehydrogenase 1 family, member L2	protein coding gene	10	-	83323314	83370004	216188
ENSMUSG00000020261	Ensembl Gene Model	MGI:2445299	Slc36a1	solute carrier family 36 (proton/amino acid symporter), member 1	protein coding gene	11	+	55095176	55127156	215335
ENSMUSG00000020263	Ensembl Gene Model	MGI:2384914	Appl2	adaptor protein, phosphotyrosine interaction, PH domain and leucine zipper containing 2	protein coding gene	10	-	83435897	83484602	216190
ENSMUSG00000020272	Ensembl Gene Model	MGI:1099439	Stk10	serine/threonine kinase 10	protein coding gene	11	+	32483305	32574587	20868
ENSMUSG00000020297	Ensembl Gene Model	MGI:1202070	Nsg2	neuron specific gene family member 2	protein coding gene	11	+	31950463	32009202	18197
ENSMUSG00000020303	Ensembl Gene Model	MGI:1316731	Stc2	stanniocalcin 2	protein coding gene	11	-	31309441	31320061	20856
ENSMUSG00000020311	Ensembl Gene Model	MGI:1914003	Erlec1	endoplasmic reticulum lectin 1	protein coding gene	11	-	30880774	30904335	66753
ENSMUSG00000020331	Ensembl Gene Model	MGI:1298210	Hcn2	hyperpolarization-activated, cyclic nucleotide-gated K+ 2	protein coding gene	10	+	79552468	79571942	15166
ENSMUSG00000020349	Ensembl Gene Model	MGI:1321159	Ppp2ca	protein phosphatase 2 (formerly 2A), catalytic subunit, alpha isoform	protein coding gene	11	+	51989651	52013576	19052
ENSMUSG00000020381	Ensembl Gene Model	MGI:1915317	Mrnip	MRN complex interacting protein	protein coding gene	11	+	50065678	50090943	68067
ENSMUSG00000020392	Ensembl Gene Model	MGI:1261797	Cdkn2aipnl	CDKN2A interacting protein N-terminal like	protein coding gene	11	+	51858488	51868161	52626
ENSMUSG00000020393	Ensembl Gene Model	MGI:1933988	Kremen1	kringle containing transmembrane protein 1	protein coding gene	11	-	5141552	5211558	84035
ENSMUSG00000020407	Ensembl Gene Model	MGI:1097668	Upp1	uridine phosphorylase 1	protein coding gene	11	+	9068103	9086170	22271
ENSMUSG00000020415	Ensembl Gene Model	MGI:1353578	Pttg1	pituitary tumor-transforming gene 1	protein coding gene	11	-	43311077	43317078	30939
ENSMUSG00000020423	Ensembl Gene Model	MGI:108384	Btg2	BTG anti-proliferation factor 2	protein coding gene	1	-	134002908	134006858	12227
ENSMUSG00000020467	Ensembl Gene Model	MGI:1339998	Efemp1	epidermal growth factor-containing fibulin-like extracellular matrix protein 1	protein coding gene	11	+	28803204	28876743	216616
ENSMUSG00000020496	Ensembl Gene Model	MGI:1914224	Rnf187	ring finger protein 187	protein coding gene	11	-	58823114	58829732	108660
ENSMUSG00000020538	Ensembl Gene Model	MGI:107606	Srebf1	sterol regulatory element binding transcription factor 1	protein coding gene	11	-	60089915	60113407	20787
ENSMUSG00000020591	Ensembl Gene Model	MGI:108018	Ntsr2	neurotensin receptor 2	protein coding gene	12	+	16703433	16710237	18217
ENSMUSG00000020592	Ensembl Gene Model	MGI:1349162	Sdc1	syndecan 1	protein coding gene	12	+	8821396	8843716	20969
ENSMUSG00000020629	Ensembl Gene Model	MGI:2144929	Adi1	acireductone dioxygenase 1	protein coding gene	12	+	28725230	28732174	104923
ENSMUSG00000020686	Ensembl Gene Model	MGI:3652048	Gas2l2	growth arrest-specific 2 like 2	protein coding gene	11	-	83312728	83320281	237891
ENSMUSG00000020701	Ensembl Gene Model	MGI:2685490	Tmem132e	transmembrane protein 132E	protein coding gene	11	+	82279726	82337158	270893
ENSMUSG00000020704	Ensembl Gene Model	MGI:1100867	Asic2	acid-sensing (proton-gated) ion channel 2	protein coding gene	11	-	80770989	81859222	11418
ENSMUSG00000020733	Ensembl Gene Model	MGI:1349482	Slc9a3r1	solute carrier family 9 (sodium/hydrogen exchanger), member 3 regulator 1	protein coding gene	11	+	115054167	115072007	26941
ENSMUSG00000020780	Ensembl Gene Model	MGI:1917447	Srp68	signal recognition particle 68	protein coding gene	11	-	116135992	116165043	217337
ENSMUSG00000020785	Ensembl Gene Model	MGI:1891766	Camkk1	calcium/calmodulin-dependent protein kinase kinase 1, alpha	protein coding gene	11	+	72909834	72932899	55984
ENSMUSG00000020810	Ensembl Gene Model	MGI:2149481	Cygb	cytoglobin	protein coding gene	11	-	116536421	116545139	114886
ENSMUSG00000020811	Ensembl Gene Model	MGI:2448493	Wscd1	WSC domain containing 1	protein coding gene	11	+	71640746	71680473	216881
ENSMUSG00000020814	Ensembl Gene Model	MGI:1914872	Mxra7	matrix-remodelling associated 7	protein coding gene	11	-	116694226	116718953	67622
ENSMUSG00000020817	Ensembl Gene Model	MGI:1860236	Rabep1	rabaptin, RAB GTPase binding effector protein 1	protein coding gene	11	+	70735604	70833931	54189
ENSMUSG00000020831	Ensembl Gene Model	MGI:1915609	0610010K14Rik	RIKEN cDNA 0610010K14 gene	protein coding gene	11	-	70126032	70128740	104457
ENSMUSG00000020834	Ensembl Gene Model	MGI:1917701	Dhrs13	dehydrogenase/reductase (SDR family) member 13	protein coding gene	11	+	77923139	77928690	70451
ENSMUSG00000020846	Ensembl Gene Model	MGI:1923816	Rflnb	refilin B	protein coding gene	11	-	75910020	75918608	76566
ENSMUSG00000020849	Ensembl Gene Model	MGI:894689	Ywhae	tyrosine 3-monooxygenase/tryptophan 5-monooxygenase activation protein, epsilon polypeptide	protein coding gene	11	+	75623695	75656671	22627
ENSMUSG00000020866	Ensembl Gene Model	MGI:1201678	Cacna1g	calcium channel, voltage-dependent, T type, alpha 1G subunit	protein coding gene	11	-	94299217	94365024	12291
ENSMUSG00000020869	Ensembl Gene Model	MGI:2138133	Lrrc59	leucine rich repeat containing 59	protein coding gene	11	+	94520603	94536049	98238
ENSMUSG00000020873	Ensembl Gene Model	MGI:1343133	Slc35b1	solute carrier family 35, member B1	protein coding gene	11	+	95275682	95282602	110172
ENSMUSG00000020889	Ensembl Gene Model	MGI:2444210	Nr1d1	nuclear receptor subfamily 1, group D, member 1	protein coding gene	11	-	98658758	98666159	217166
ENSMUSG00000020893	Ensembl Gene Model	MGI:1098283	Per1	period circadian clock 1	protein coding gene	11	+	68986043	69000786	18626
ENSMUSG00000020898	Ensembl Gene Model	MGI:1916214	Ctc1	CTS telomere maintenance complex component 1	protein coding gene	11	+	68906737	68927299	68964
ENSMUSG00000020899	Ensembl Gene Model	MGI:2684864	Pfas	phosphoribosylformylglycinamidine synthase (FGAR amidotransferase)	protein coding gene	11	-	68876527	68899286	237823
ENSMUSG00000020902	Ensembl Gene Model	MGI:105088	Ntn1	netrin 1	protein coding gene	11	-	68100190	68277652	18208
ENSMUSG00000020917	Ensembl Gene Model	MGI:103251	Acly	ATP citrate lyase	protein coding gene	11	-	100367179	100418826	104112
ENSMUSG00000020919	Ensembl Gene Model	MGI:103035	Stat5b	signal transducer and activator of transcription 5B	protein coding gene	11	-	100671557	100741407	20851
ENSMUSG00000020935	Ensembl Gene Model	MGI:1915337	Dcakd	dephospho-CoA kinase domain containing	protein coding gene	11	-	102884873	102919159	68087
ENSMUSG00000020936	Ensembl Gene Model	MGI:102579	Nmt1	N-myristoyltransferase 1	protein coding gene	11	+	102919163	102959734	18107
ENSMUSG00000020953	Ensembl Gene Model	MGI:1278313	Coch	cochlin	protein coding gene	12	+	51640124	51652554	12810
ENSMUSG00000021136	Ensembl Gene Model	MGI:1929878	Smoc1	SPARC related modular calcium binding 1	protein coding gene	12	+	81073582	81233188	64075
ENSMUSG00000021143	Ensembl Gene Model	MGI:1924399	Pacs2	phosphofurin acidic cluster sorting protein 2	protein coding gene	12	+	112978128	113038021	217893
ENSMUSG00000021144	Ensembl Gene Model	MGI:2150037	Mta1	metastasis associated 1	protein coding gene	12	+	113061898	113100826	116870
ENSMUSG00000021185	Ensembl Gene Model	MGI:2444813	Dglucy	D-glutamate cyclase	protein coding gene	12	+	100745316	100838869	217830
ENSMUSG00000021203	Ensembl Gene Model	MGI:1915399	Otub2	OTU domain, ubiquitin aldehyde binding 2	protein coding gene	12	+	103354941	103372609	68149
ENSMUSG00000021221	Ensembl Gene Model	MGI:1917377	Dpf3	double PHD fingers 3	protein coding gene	12	-	83260519	83534490	70127
ENSMUSG00000021236	Ensembl Gene Model	MGI:1321385	Entpd5	ectonucleoside triphosphate diphosphohydrolase 5	protein coding gene	12	-	84420649	84455803	12499
ENSMUSG00000021238	Ensembl Gene Model	MGI:1915077	Aldh6a1	aldehyde dehydrogenase family 6, subfamily A1	protein coding gene	12	-	84477491	84497778	104776
ENSMUSG00000021250	Ensembl Gene Model	MGI:95574	Fos	FBJ osteosarcoma oncogene	protein coding gene	12	+	85520664	85524047	14281
ENSMUSG00000021253	Ensembl Gene Model	MGI:98727	Tgfb3	transforming growth factor, beta 3	protein coding gene	12	-	86103519	86125815	21809
ENSMUSG00000021259	Ensembl Gene Model	MGI:1341877	Cyp46a1	cytochrome P450, family 46, subfamily a, polypeptide 1	protein coding gene	12	+	108300640	108328493	13116
ENSMUSG00000021260	Ensembl Gene Model	MGI:1919265	Hhipl1	hedgehog interacting protein-like 1	protein coding gene	12	+	108272100	108294559	214305
ENSMUSG00000021266	Ensembl Gene Model	MGI:104630	Wars1	tryptophanyl-tRNA synthetase1	protein coding gene	12	-	108825956	108860100	22375
ENSMUSG00000021275	Ensembl Gene Model	MGI:2144865	Tecpr2	tectonin beta-propeller repeat containing 2	protein coding gene	12	+	110855698	110938828	104859
ENSMUSG00000021314	Ensembl Gene Model	MGI:103574	Amph	amphiphysin	protein coding gene	13	+	19132375	19335091	218038
ENSMUSG00000021373	Ensembl Gene Model	MGI:1914502	Cap2	CAP, adenylate cyclase-associated protein, 2 (yeast)	protein coding gene	13	+	46655379	46803757	67252
ENSMUSG00000021376	Ensembl Gene Model	MGI:98812	Tpmt	thiopurine methyltransferase	protein coding gene	13	-	47175463	47196833	22017
ENSMUSG00000021468	Ensembl Gene Model	MGI:1099431	Sptlc1	serine palmitoyltransferase, long chain base subunit 1	protein coding gene	13	-	53486784	53531433	268656
ENSMUSG00000021474	Ensembl Gene Model	MGI:2137677	Sfxn1	sideroflexin 1	protein coding gene	13	+	54225888	54262361	14057
ENSMUSG00000021481	Ensembl Gene Model	MGI:1349417	Zfp346	zinc finger protein 346	protein coding gene	13	+	55253124	55282638	26919
ENSMUSG00000021482	Ensembl Gene Model	MGI:1913379	Prxl2c	peroxiredoxin like 2C	protein coding gene	13	-	64437612	64460524	66129
ENSMUSG00000021508	Ensembl Gene Model	MGI:1888514	Cxcl14	chemokine (C-X-C motif) ligand 14	protein coding gene	13	-	56436456	56444364	57266
ENSMUSG00000021567	Ensembl Gene Model	MGI:1919543	Nkd2	naked cuticle 2	protein coding gene	13	-	73966653	73995750	72293
ENSMUSG00000021573	Ensembl Gene Model	MGI:1920198	Tppp	tubulin polymerization promoting protein	protein coding gene	13	+	74157538	74183872	72948
ENSMUSG00000021576	Ensembl Gene Model	MGI:109283	Pdcd6	programmed cell death 6	protein coding gene	13	-	74451628	74465699	18570
ENSMUSG00000021583	Ensembl Gene Model	MGI:1933403	Erap1	endoplasmic reticulum aminopeptidase 1	protein coding gene	13	+	74787692	74841324	80898
ENSMUSG00000021597	Ensembl Gene Model	MGI:2145448	Slf1	SMC5-SMC6 complex localization factor 1	protein coding gene	13	-	77191207	77283592	105377
ENSMUSG00000021665	Ensembl Gene Model	MGI:96074	Hexb	hexosaminidase B	protein coding gene	13	-	97312839	97334865	15212
ENSMUSG00000021684	Ensembl Gene Model	MGI:2443999	Pde8b	phosphodiesterase 8B	protein coding gene	13	-	95160962	95386844	218461
ENSMUSG00000021696	Ensembl Gene Model	MGI:1921809	Elovl7	ELOVL family member 7, elongation of long chain fatty acids (yeast)	protein coding gene	13	+	108350938	108422217	74559
ENSMUSG00000021704	Ensembl Gene Model	MGI:2686040	Mtx3	metaxin 3	protein coding gene	13	+	92981268	92994738	382793
ENSMUSG00000021708	Ensembl Gene Model	MGI:109137	Rasgrf2	RAS protein-specific guanine nucleotide-releasing factor 2	protein coding gene	13	-	92028519	92268164	19418
ENSMUSG00000021719	Ensembl Gene Model	MGI:106334	Rgs7bp	regulator of G-protein signalling 7 binding protein	protein coding gene	13	-	105082412	105191438	52882
ENSMUSG00000021814	Ensembl Gene Model	MGI:88031	Anxa7	annexin A7	protein coding gene	14	-	20505328	20530201	11750
ENSMUSG00000021820	Ensembl Gene Model	MGI:88259	Camk2g	calcium/calmodulin-dependent protein kinase II gamma	protein coding gene	14	-	20784943	20844156	12325
ENSMUSG00000021840	Ensembl Gene Model	MGI:2444022	Mapk1ip1l	mitogen-activated protein kinase 1 interacting protein 1-like	protein coding gene	14	+	47535731	47560663	218975
ENSMUSG00000021866	Ensembl Gene Model	MGI:108481	Anxa11	annexin A11	protein coding gene	14	+	25842580	25887228	11744
ENSMUSG00000021884	Ensembl Gene Model	MGI:1929657	Hacl1	2-hydroxyacyl-CoA lyase 1	protein coding gene	14	-	31329183	31364201	56794
ENSMUSG00000021893	Ensembl Gene Model	MGI:1338030	Capn7	calpain 7	protein coding gene	14	+	31058595	31093943	12339
ENSMUSG00000021939	Ensembl Gene Model	MGI:88561	Ctsb	cathepsin B	protein coding gene	14	+	63359911	63383372	13030
ENSMUSG00000021943	Ensembl Gene Model	MGI:95684	Gdf10	growth differentiation factor 10	protein coding gene	14	+	33645544	33658471	14560
ENSMUSG00000021957	Ensembl Gene Model	MGI:105992	Tkt	transketolase	protein coding gene	14	+	30271088	30296681	21881
ENSMUSG00000021975	Ensembl Gene Model	MGI:1098533	Ints9	integrator complex subunit 9	protein coding gene	14	+	65187494	65277284	210925
ENSMUSG00000021993	Ensembl Gene Model	MGI:1917728	Mipep	mitochondrial intermediate peptidase	protein coding gene	14	+	61022022	61142927	70478
ENSMUSG00000022018	Ensembl Gene Model	MGI:1913464	Rgcc	regulator of cell cycle	protein coding gene	14	-	79526190	79539075	66214
ENSMUSG00000022055	Ensembl Gene Model	MGI:97313	Nefl	neurofilament, light polypeptide	protein coding gene	14	+	68321312	68326544	18039
ENSMUSG00000022099	Ensembl Gene Model	MGI:99670	Dmtn	dematin actin binding protein	protein coding gene	14	-	70839624	70873488	13829
ENSMUSG00000022103	Ensembl Gene Model	MGI:1195462	Gfra2	glial cell line derived neurotrophic factor family receptor alpha 2	protein coding gene	14	+	71127560	71217278	14586
ENSMUSG00000022131	Ensembl Gene Model	MGI:1930949	Gpr180	G protein-coupled receptor 180	protein coding gene	14	+	118374570	118400673	58245
ENSMUSG00000022159	Ensembl Gene Model	MGI:1923588	Rab2b	RAB2B, member RAS oncogene family	protein coding gene	14	-	52499216	52516852	76338
ENSMUSG00000022180	Ensembl Gene Model	MGI:1355323	Slc7a8	solute carrier family 7 (cationic amino acid transporter, y+ system), member 8	protein coding gene	14	-	54959672	55019343	50934
ENSMUSG00000022208	Ensembl Gene Model	MGI:2443113	Jph4	junctophilin 4	protein coding gene	14	-	55344283	55354392	319984
ENSMUSG00000022211	Ensembl Gene Model	MGI:2448573	Carmil3	capping protein regulator and myosin 1 linker 3	protein coding gene	14	+	55728108	55745729	268747
ENSMUSG00000022212	Ensembl Gene Model	MGI:1334445	Cpne6	copine VI	protein coding gene	14	+	55747902	55754888	12891
ENSMUSG00000022241	Ensembl Gene Model	MGI:106314	Tars	threonyl-tRNA synthetase	protein coding gene	15	-	11383749	11399744	110960
ENSMUSG00000022244	Ensembl Gene Model	MGI:1098273	Amacr	alpha-methylacyl-CoA racemase	protein coding gene	15	+	10981842	10996710	17117
ENSMUSG00000022253	Ensembl Gene Model	MGI:1915896	Nadk2	NAD kinase 2, mitochondrial	protein coding gene	15	+	9071340	9110584	68646
ENSMUSG00000022261	Ensembl Gene Model	MGI:1349165	Sdc2	syndecan 2	protein coding gene	15	+	32920869	33034867	15529
ENSMUSG00000022296	Ensembl Gene Model	MGI:1928704	Baalc	brain and acute leukemia, cytoplasmic	protein coding gene	15	+	38739763	38814659	118452
ENSMUSG00000022324	Ensembl Gene Model	MGI:109613	Matn2	matrilin 2	protein coding gene	15	+	34306827	34436388	17181
ENSMUSG00000022337	Ensembl Gene Model	MGI:1913986	Emc2	ER membrane protein complex subunit 2	protein coding gene	15	+	43340625	43391159	66736
ENSMUSG00000022372	Ensembl Gene Model	MGI:104295	Sla	src-like adaptor	protein coding gene	15	-	66652668	66703678	20491
ENSMUSG00000022389	Ensembl Gene Model	MGI:98663	Tef	thyrotroph embryonic factor	protein coding gene	15	+	81686874	81711064	21685
ENSMUSG00000022391	Ensembl Gene Model	MGI:103071	Rangap1	RAN GTPase activating protein 1	protein coding gene	15	-	81588449	81614120	19387
ENSMUSG00000022416	Ensembl Gene Model	MGI:2178051	Cacna1i	calcium channel, voltage-dependent, alpha 1I subunit	protein coding gene	15	+	80171439	80282480	239556
ENSMUSG00000022421	Ensembl Gene Model	MGI:1920590	Nptxr	neuronal pentraxin receptor	protein coding gene	15	-	79670552	79688910	73340
ENSMUSG00000022426	Ensembl Gene Model	MGI:1921408	Josd1	Josephin domain containing 1	protein coding gene	15	-	79558451	79572073	74158
ENSMUSG00000022439	Ensembl Gene Model	MGI:2158329	Parvg	parvin, gamma	protein coding gene	15	+	84208388	84227179	64099
ENSMUSG00000022453	Ensembl Gene Model	MGI:1261422	Naga	N-acetyl galactosaminidase, alpha	protein coding gene	15	-	82213733	82223076	17939
ENSMUSG00000022456	Ensembl Gene Model	MGI:1345148	Septin3	septin 3	protein coding gene	15	+	82153003	82178775	24050
ENSMUSG00000022469	Ensembl Gene Model	MGI:2441741	Rapgef3	Rap guanine nucleotide exchange factor (GEF) 3	protein coding gene	15	-	97642651	97665853	223864
ENSMUSG00000022472	Ensembl Gene Model	MGI:106313	Desi1	desumoylating isopeptidase 1	protein coding gene	15	-	81876724	81900424	28075
ENSMUSG00000022477	Ensembl Gene Model	MGI:87880	Aco2	aconitase 2, mitochondrial	protein coding gene	15	+	81756664	81799338	11429
ENSMUSG00000022494	Ensembl Gene Model	MGI:1919805	Shisa9	shisa family member 9	protein coding gene	16	+	11801977	12088766	72555
ENSMUSG00000022517	Ensembl Gene Model	MGI:2447670	Mgrn1	mahogunin, ring finger 1	protein coding gene	16	+	4704113	4756160	17237
ENSMUSG00000022519	Ensembl Gene Model	MGI:2146620	Srl	sarcalumenin	protein coding gene	16	-	4298080	4359680	106393
ENSMUSG00000022560	Ensembl Gene Model	MGI:1289288	Slc52a2	solute carrier protein 52, member 2	protein coding gene	15	+	76423032	76428808	52710
ENSMUSG00000022564	Ensembl Gene Model	MGI:1913418	Grina	glutamate receptor, ionotropic, N-methyl D-aspartate-associated protein 1 (glutamate binding)	protein coding gene	15	+	76130964	76134104	66168
ENSMUSG00000022571	Ensembl Gene Model	MGI:1913444	Pycrl	pyrroline-5-carboxylate reductase-like	protein coding gene	15	-	75788326	75793409	66194
ENSMUSG00000022602	Ensembl Gene Model	MGI:88067	Arc	activity regulated cytoskeletal-associated protein	protein coding gene	15	-	74540932	74544419	11838
ENSMUSG00000022620	Ensembl Gene Model	MGI:88077	Arsa	arylsulfatase A	protein coding gene	15	-	89356679	89361627	11883
ENSMUSG00000022636	Ensembl Gene Model	MGI:1313266	Alcam	activated leukocyte cell adhesion molecule	protein coding gene	16	-	52069359	52273444	11658
ENSMUSG00000022738	Ensembl Gene Model	MGI:892006	Gsc2	goosecoid homebox 2	protein coding gene	16	-	17730978	17732891	195333
ENSMUSG00000022751	Ensembl Gene Model	MGI:1261838	Nit2	nitrilase family, member 2	protein coding gene	16	-	56977028	56987695	52633
ENSMUSG00000022752	Ensembl Gene Model	MGI:106295	Tomm70a	translocase of outer mitochondrial membrane 70A	protein coding gene	16	+	56942077	56974893	28185
ENSMUSG00000022816	Ensembl Gene Model	MGI:102793	Fstl1	follistatin-like 1	protein coding gene	16	+	37597417	37656878	14314
ENSMUSG00000022817	Ensembl Gene Model	MGI:96614	Itgb5	integrin beta 5	protein coding gene	16	+	33650035	33769708	16419
ENSMUSG00000022827	Ensembl Gene Model	MGI:1914907	Rabl3	RAB, member RAS oncogene family-like 3	protein coding gene	16	+	37360247	37392747	67657
ENSMUSG00000022828	Ensembl Gene Model	MGI:1921447	Gtf2e1	general transcription factor II E, polypeptide 1 (alpha subunit)	protein coding gene	16	-	37330158	37360151	74197
ENSMUSG00000022840	Ensembl Gene Model	MGI:99673	Adcy5	adenylate cyclase 5	protein coding gene	16	+	34975247	35126108	224129
ENSMUSG00000022843	Ensembl Gene Model	MGI:105061	Clcn2	chloride channel, voltage-sensitive 2	protein coding gene	16	-	20521714	20536496	12724
ENSMUSG00000022856	Ensembl Gene Model	MGI:1913914	Tmem41a	transmembrane protein 41a	protein coding gene	16	-	21753077	21766302	66664
ENSMUSG00000022860	Ensembl Gene Model	MGI:2179069	Chodl	chondrolectin	protein coding gene	16	+	78727836	78748621	246048
ENSMUSG00000022861	Ensembl Gene Model	MGI:105060	Dgkg	diacylglycerol kinase, gamma	protein coding gene	16	-	22287211	22475971	110197
ENSMUSG00000022887	Ensembl Gene Model	MGI:88492	Masp1	mannan-binding lectin serine peptidase 1	protein coding gene	16	-	23268167	23339565	17174
ENSMUSG00000022898	Ensembl Gene Model	MGI:1206040	Vps26c	VPS26 endosomal protein sorting factor C	protein coding gene	16	-	94298583	94327488	13185
ENSMUSG00000022899	Ensembl Gene Model	MGI:1890457	Slc15a2	solute carrier family 15 (H+/peptide transporter), member 2	protein coding gene	16	-	36570539	36605324	57738
ENSMUSG00000022913	Ensembl Gene Model	MGI:1860263	Psmg1	proteasome (prosome, macropain) assembly chaperone 1	protein coding gene	16	-	95781133	95792160	56088
ENSMUSG00000022935	Ensembl Gene Model	MGI:95814	Grik1	glutamate receptor, ionotropic, kainate 1	protein coding gene	16	-	87692788	88087153	14805
ENSMUSG00000022951	Ensembl Gene Model	MGI:1890564	Rcan1	regulator of calcineurin 1	protein coding gene	16	-	92188839	92263057	54720
ENSMUSG00000023011	Ensembl Gene Model	MGI:1919643	Faim2	Fas apoptotic inhibitory molecule 2	protein coding gene	15	-	99394893	99426046	72393
ENSMUSG00000023017	Ensembl Gene Model	MGI:1194915	Asic1	acid-sensing (proton-gated) ion channel 1	protein coding gene	15	+	99568249	99599011	11419
ENSMUSG00000023034	Ensembl Gene Model	MGI:1352454	Nr4a1	nuclear receptor subfamily 4, group A, member 1	protein coding gene	15	+	101152150	101172676	15370
ENSMUSG00000023048	Ensembl Gene Model	MGI:1913401	Prr13	proline rich 13	protein coding gene	15	+	102367605	102371241	66151
ENSMUSG00000023094	Ensembl Gene Model	MGI:1923717	Msrb2	methionine sulfoxide reductase B2	protein coding gene	2	+	19376251	19399787	76467
ENSMUSG00000023262	Ensembl Gene Model	MGI:87913	Acy1	aminoacylase 1	protein coding gene	9	-	106310180	106315518	109652
ENSMUSG00000023266	Ensembl Gene Model	MGI:2135965	Frs3	fibroblast growth factor receptor substrate 3	protein coding gene	17	+	47999955	48015211	107971
ENSMUSG00000023367	Ensembl Gene Model	MGI:1913308	Tmem176a	transmembrane protein 176A	protein coding gene	6	+	48818417	48822298	66058
ENSMUSG00000023806	Ensembl Gene Model	MGI:3630308	Rsph3b	radial spoke 3B homolog (Chlamydomonas)	protein coding gene	17	-	7172115	7215755	100037282
ENSMUSG00000023828	Ensembl Gene Model	MGI:1333817	Slc22a3	solute carrier family 22 (organic cation transporter), member 3	protein coding gene	17	-	12638859	12726591	20519
ENSMUSG00000023861	Ensembl Gene Model	MGI:1915240	Mpc1	mitochondrial pyruvate carrier 1	protein coding gene	17	+	8502590	8516499	55951
ENSMUSG00000023882	Ensembl Gene Model	MGI:99201	Zfp54	zinc finger protein 54	protein coding gene	17	+	21643489	21655646	22712
ENSMUSG00000023883	Ensembl Gene Model	MGI:1919307	Phf10	PHD finger protein 10	protein coding gene	17	-	15165271	15181535	72057
ENSMUSG00000023909	Ensembl Gene Model	MGI:1923748	Paqr4	progestin and adipoQ receptor family member IV	protein coding gene	17	-	23955160	23959841	76498
ENSMUSG00000023915	Ensembl Gene Model	MGI:2151075	Tnfrsf21	tumor necrosis factor receptor superfamily, member 21	protein coding gene	17	+	43327446	43400079	94185
ENSMUSG00000023923	Ensembl Gene Model	MGI:1919488	Tbc1d5	TBC1 domain family, member 5	protein coding gene	17	-	51040152	51486380	72238
ENSMUSG00000023967	Ensembl Gene Model	MGI:1915815	Mrps18a	mitochondrial ribosomal protein S18A	protein coding gene	17	+	46421930	46439834	68565
ENSMUSG00000023988	Ensembl Gene Model	MGI:1858419	Bysl	bystin-like	protein coding gene	17	-	47910256	47922417	53414
ENSMUSG00000023990	Ensembl Gene Model	MGI:103270	Tfeb	transcription factor EB	protein coding gene	17	+	48047962	48103341	21425
ENSMUSG00000023994	Ensembl Gene Model	MGI:97316	Nfya	nuclear transcription factor-Y alpha	protein coding gene	17	-	48693913	48716848	18044
ENSMUSG00000024008	Ensembl Gene Model	MGI:2385908	Cpne5	copine V	protein coding gene	17	-	29375495	29456764	240058
ENSMUSG00000024012	Ensembl Gene Model	MGI:1929261	Mtch1	mitochondrial carrier 1	protein coding gene	17	-	29551046	29566908	56462
ENSMUSG00000024042	Ensembl Gene Model	MGI:104754	Sik1	salt inducible kinase 1	protein coding gene	17	-	32063224	32074778	17691
ENSMUSG00000024064	Ensembl Gene Model	MGI:1918935	Galnt14	polypeptide N-acetylgalactosaminyltransferase 14	protein coding gene	17	-	73800223	74017448	71685
ENSMUSG00000024065	Ensembl Gene Model	MGI:1928900	Ehd3	EH-domain containing 3	protein coding gene	17	+	74111836	74139088	57440
ENSMUSG00000024140	Ensembl Gene Model	MGI:109169	Epas1	endothelial PAS domain protein 1	protein coding gene	17	+	87061292	87140838	13819
ENSMUSG00000024143	Ensembl Gene Model	MGI:1931553	Rhoq	ras homolog family member Q	protein coding gene	17	+	87270539	87307497	104215
ENSMUSG00000024165	Ensembl Gene Model	MGI:1196260	Jpt2	Jupiter microtubule associated homolog 2	protein coding gene	17	-	25161444	25179597	52009
ENSMUSG00000024187	Ensembl Gene Model	MGI:2146854	Fam234a	family with sequence similarity 234, member A	protein coding gene	17	-	26431666	26463281	106581
ENSMUSG00000024193	Ensembl Gene Model	MGI:98647	Phf1	PHD finger protein 1	protein coding gene	17	+	27152101	27156882	21652
ENSMUSG00000024222	Ensembl Gene Model	MGI:104670	Fkbp5	FK506 binding protein 5	protein coding gene	17	-	28617727	28705123	14229
ENSMUSG00000024238	Ensembl Gene Model	MGI:1344313	Zeb1	zinc finger E-box binding homeobox 1	protein coding gene	18	+	5591860	5775467	21417
ENSMUSG00000024241	Ensembl Gene Model	MGI:98354	Sos1	SOS Ras/Rac guanine nucleotide exchange factor 1	protein coding gene	17	-	80701181	80787882	20662
ENSMUSG00000024369	Ensembl Gene Model	MGI:102744	Nelfe	negative elongation factor complex member E, Rdbp	protein coding gene	17	+	35069367	35075348	27632
ENSMUSG00000024376	Ensembl Gene Model	MGI:103007	Epb41l4a	erythrocyte membrane protein band 4.1 like 4a	protein coding gene	18	-	33929380	34140019	13824
ENSMUSG00000024403	Ensembl Gene Model	MGI:1913487	Atp6v1g2	ATPase, H+ transporting, lysosomal V1 subunit G2	protein coding gene	17	+	35453910	35457743	66237
ENSMUSG00000024442	Ensembl Gene Model	MGI:1914089	Dele1	DAP3 binding cell death enhancer 1	protein coding gene	18	+	38383302	38395682	66839
ENSMUSG00000024451	Ensembl Gene Model	MGI:2147274	Arap3	ArfGAP with RhoGAP domain, ankyrin repeat and PH domain 3	protein coding gene	18	-	38105681	38132022	106952
ENSMUSG00000024479	Ensembl Gene Model	MGI:2146021	Mal2	mal, T cell differentiation protein 2	protein coding gene	15	+	54434762	54466242	105853
ENSMUSG00000024501	Ensembl Gene Model	MGI:1349762	Dpysl3	dihydropyrimidinase-like 3	protein coding gene	18	-	43454049	43571351	22240
ENSMUSG00000024525	Ensembl Gene Model	MGI:2149728	Impa2	inositol monophosphatase 2	protein coding gene	18	+	67422246	67454375	114663
ENSMUSG00000024558	Ensembl Gene Model	MGI:2444559	Mapk4	mitogen-activated protein kinase 4	protein coding gene	18	-	74061557	74198430	225724
ENSMUSG00000024576	Ensembl Gene Model	MGI:1934950	Csnk1a1	casein kinase 1, alpha 1	protein coding gene	18	+	61688345	61723132	93687
ENSMUSG00000024579	Ensembl Gene Model	MGI:3606062	Pcyox1l	prenylcysteine oxidase 1 like	protein coding gene	18	-	61829908	61840706	240334
ENSMUSG00000024581	Ensembl Gene Model	MGI:104561	Napg	N-ethylmaleimide sensitive fusion protein attachment protein gamma	protein coding gene	18	+	63110902	63132521	108123
ENSMUSG00000024592	Ensembl Gene Model	MGI:1924672	C330018D20Rik	RIKEN cDNA C330018D20 gene	protein coding gene	18	-	57088905	57108440	77422
ENSMUSG00000024594	Ensembl Gene Model	MGI:1916106	Prrc1	proline-rich coiled-coil 1	protein coding gene	18	+	57487813	57526028	73137
ENSMUSG00000024601	Ensembl Gene Model	MGI:1913557	Isoc1	isochorismatase domain containing 1	protein coding gene	18	+	58792554	58812642	66307
ENSMUSG00000024610	Ensembl Gene Model	MGI:96534	Cd74	CD74 antigen (invariant polypeptide of major histocompatibility complex, class II antigen-associated)	protein coding gene	18	+	60936921	60945724	16149
ENSMUSG00000024617	Ensembl Gene Model	MGI:88256	Camk2a	calcium/calmodulin-dependent protein kinase II alpha	protein coding gene	18	+	61058690	61121224	12322
ENSMUSG00000024620	Ensembl Gene Model	MGI:97531	Pdgfrb	platelet derived growth factor receptor, beta polypeptide	protein coding gene	18	+	61178222	61218133	18596
ENSMUSG00000024640	Ensembl Gene Model	MGI:2183441	Psat1	phosphoserine aminotransferase 1	protein coding gene	19	-	15882487	15902423	107272
ENSMUSG00000024644	Ensembl Gene Model	MGI:1913304	Cndp2	CNDP dipeptidase 2 (metallopeptidase M20 family)	protein coding gene	18	-	84685590	84703827	66054
ENSMUSG00000024654	Ensembl Gene Model	MGI:1913764	Asrgl1	asparaginase like 1	protein coding gene	19	-	9089083	9112930	66514
ENSMUSG00000024661	Ensembl Gene Model	MGI:95588	Fth1	ferritin heavy polypeptide 1	protein coding gene	19	+	9957962	9962462	14319
ENSMUSG00000024663	Ensembl Gene Model	MGI:1922010	Rab3il1	RAB3A interacting protein (rabin3)-like 1	protein coding gene	19	+	9979033	10015744	74760
ENSMUSG00000024665	Ensembl Gene Model	MGI:1930079	Fads2	fatty acid desaturase 2	protein coding gene	19	-	10040129	10078867	56473
ENSMUSG00000024743	Ensembl Gene Model	MGI:1859545	Syt7	synaptotagmin VII	protein coding gene	19	+	10366454	10430544	54525
ENSMUSG00000024772	Ensembl Gene Model	MGI:1341878	Ehd1	EH-domain containing 1	protein coding gene	19	+	6326926	6350126	13660
ENSMUSG00000024782	Ensembl Gene Model	MGI:1860835	Ak3	adenylate kinase 3	protein coding gene	19	-	28998233	29025361	56248
ENSMUSG00000024785	Ensembl Gene Model	MGI:1913275	Rcl1	RNA terminal phosphate cyclase-like 1	protein coding gene	19	+	29078761	29121251	59028
ENSMUSG00000024824	Ensembl Gene Model	MGI:1328356	Rad9a	RAD9 checkpoint clamp component A	protein coding gene	19	-	4245195	4251661	19367
ENSMUSG00000024827	Ensembl Gene Model	MGI:1341155	Gldc	glycine decarboxylase	protein coding gene	19	-	30075847	30152829	104174
ENSMUSG00000024841	Ensembl Gene Model	MGI:1917110	Eif1ad	eukaryotic translation initiation factor 1A domain containing	protein coding gene	19	+	5416841	5421546	69860
ENSMUSG00000024843	Ensembl Gene Model	MGI:107760	Chka	choline kinase alpha	protein coding gene	19	+	3901773	3944369	12660
ENSMUSG00000024891	Ensembl Gene Model	MGI:1345278	Slc29a2	solute carrier family 29 (nucleoside transporters), member 2	protein coding gene	19	+	5073888	5082000	13340
ENSMUSG00000024892	Ensembl Gene Model	MGI:97520	Pcx	pyruvate carboxylase	protein coding gene	19	+	4560500	4671780	18563
ENSMUSG00000024899	Ensembl Gene Model	MGI:1330223	Papss2	3'-phosphoadenosine 5'-phosphosulfate synthase 2	protein coding gene	19	+	32573190	32644587	23972
ENSMUSG00000024909	Ensembl Gene Model	MGI:1891209	Efemp2	epidermal growth factor-containing fibulin-like extracellular matrix protein 2	protein coding gene	19	+	5523982	5532545	58859
ENSMUSG00000024913	Ensembl Gene Model	MGI:1278315	Lrp5	low density lipoprotein receptor-related protein 5	protein coding gene	19	-	3634828	3736564	16973
ENSMUSG00000024935	Ensembl Gene Model	MGI:105083	Slc1a1	solute carrier family 1 (neuronal/epithelial high affinity glutamate transporter, system Xag), member 1	protein coding gene	19	+	28812535	28891360	20510
ENSMUSG00000024958	Ensembl Gene Model	MGI:2147529	Gpr137	G protein-coupled receptor 137	protein coding gene	19	-	6915425	6919818	107173
ENSMUSG00000024960	Ensembl Gene Model	MGI:104778	Plcb3	phospholipase C, beta 3	protein coding gene	19	-	6931081	6951738	18797
ENSMUSG00000024962	Ensembl Gene Model	MGI:106199	Vegfb	vascular endothelial growth factor B	protein coding gene	19	-	6959841	6965019	22340
ENSMUSG00000024975	Ensembl Gene Model	MGI:107490	Pdcd4	programmed cell death 4	protein coding gene	19	+	53880662	53918291	18569
ENSMUSG00000024993	Ensembl Gene Model	MGI:1915144	Dennd10	DENN domain containing 10	protein coding gene	19	+	60800023	60824665	67894
ENSMUSG00000024997	Ensembl Gene Model	MGI:88034	Prdx3	peroxiredoxin 3	protein coding gene	19	-	60852504	60862976	11757
ENSMUSG00000025007	Ensembl Gene Model	MGI:1888908	Aldh18a1	aldehyde dehydrogenase 18 family, member A1	protein coding gene	19	-	40538701	40576907	56454
ENSMUSG00000025020	Ensembl Gene Model	MGI:1315203	Slit1	slit guidance ligand 1	protein coding gene	19	-	41588696	41732104	20562
ENSMUSG00000025025	Ensembl Gene Model	MGI:97245	Mxi1	MAX interactor 1, dimerization protein	protein coding gene	19	+	53298509	53361724	17859
ENSMUSG00000025103	Ensembl Gene Model	MGI:1933765	Btbd1	BTB (POZ) domain containing 1	protein coding gene	7	-	81441822	81479179	83962
ENSMUSG00000025132	Ensembl Gene Model	MGI:2178103	Arhgdia	Rho GDP dissociation inhibitor (GDI) alpha	protein coding gene	11	-	120468930	120472450	192662
ENSMUSG00000025140	Ensembl Gene Model	MGI:2384795	Pycr1	pyrroline-5-carboxylate reductase 1	protein coding gene	11	-	120527591	120534602	209027
ENSMUSG00000025144	Ensembl Gene Model	MGI:894324	Cenpx	centromere protein X	protein coding gene	11	-	120601768	120604564	20892
ENSMUSG00000025159	Ensembl Gene Model	MGI:1919449	Mms19	MMS19 cytosolic iron-sulfur assembly component	protein coding gene	19	-	41932146	41969603	72199
ENSMUSG00000025212	Ensembl Gene Model	MGI:2137679	Sfxn3	sideroflexin 3	protein coding gene	19	+	45035942	45044822	94280
ENSMUSG00000025221	Ensembl Gene Model	MGI:2135916	Kcnip2	Kv channel-interacting protein 2	protein coding gene	19	-	45780785	45804948	80906
ENSMUSG00000025227	Ensembl Gene Model	MGI:1922396	Mfsd13a	major facilitator superfamily domain containing 13a	protein coding gene	19	+	46345315	46363693	75146
ENSMUSG00000025228	Ensembl Gene Model	MGI:1858964	Actr1a	ARP1 actin-related protein 1A, centractin alpha	protein coding gene	19	-	46365252	46384180	54130
ENSMUSG00000025232	Ensembl Gene Model	MGI:96073	Hexa	hexosaminidase A	protein coding gene	9	+	59446823	59472392	15211
ENSMUSG00000025236	Ensembl Gene Model	MGI:1919391	Adpgk	ADP-dependent glucokinase	protein coding gene	9	+	59198855	59223483	72141
ENSMUSG00000025237	Ensembl Gene Model	MGI:1914537	Parp6	poly (ADP-ribose) polymerase family, member 6	protein coding gene	9	+	59524567	59557568	67287
ENSMUSG00000025239	Ensembl Gene Model	MGI:1352502	Limd1	LIM domains containing 1	protein coding gene	9	+	123307771	123350617	29806
ENSMUSG00000025272	Ensembl Gene Model	MGI:1928994	Tro	trophinin	protein coding gene	X	-	149428300	149440579	56191
ENSMUSG00000025277	Ensembl Gene Model	MGI:1913332	Abhd6	abhydrolase domain containing 6	protein coding gene	14	-	14413010	14466871	66082
ENSMUSG00000025316	Ensembl Gene Model	MGI:1889023	Banp	BTG3 associated nuclear protein	protein coding gene	8	+	122676489	122755997	53325
ENSMUSG00000025348	Ensembl Gene Model	MGI:102700	Itga7	integrin alpha 7	protein coding gene	10	+	128769687	128794151	16404
ENSMUSG00000025370	Ensembl Gene Model	MGI:107433	Cdh9	cadherin 9	protein coding gene	15	+	16728842	16857180	12565
ENSMUSG00000025380	Ensembl Gene Model	MGI:2443337	Fscn2	fascin actin-bundling protein 2	protein coding gene	11	+	120252360	120258994	238021
ENSMUSG00000025381	Ensembl Gene Model	MGI:1928477	Cnpy2	canopy FGF signaling regulator 2	protein coding gene	10	+	128157972	128163056	56530
ENSMUSG00000025384	Ensembl Gene Model	MGI:1919135	Faap100	Fanconi anemia core complex associated protein 100	protein coding gene	11	-	120260388	120269572	71885
ENSMUSG00000025400	Ensembl Gene Model	MGI:98476	Tac2	tachykinin 2	protein coding gene	10	+	127560347	127567637	21334
ENSMUSG00000025403	Ensembl Gene Model	MGI:1277989	Shmt2	serine hydroxymethyltransferase 2 (mitochondrial)	protein coding gene	10	-	127352992	127358313	108037
ENSMUSG00000025408	Ensembl Gene Model	MGI:109247	Ddit3	DNA-damage inducible transcript 3	protein coding gene	10	+	127126662	127132160	13198
ENSMUSG00000025425	Ensembl Gene Model	MGI:109243	St8sia5	ST8 alpha-N-acetyl-neuraminide alpha-2,8-sialyltransferase 5	protein coding gene	18	+	77273543	77343146	225742
ENSMUSG00000025432	Ensembl Gene Model	MGI:1333798	Avil	advillin	protein coding gene	10	+	126836578	126856863	11567
ENSMUSG00000025465	Ensembl Gene Model	MGI:2136460	Echs1	enoyl Coenzyme A hydratase, short chain, 1, mitochondrial	protein coding gene	7	-	139685623	139696334	93747
ENSMUSG00000025475	Ensembl Gene Model	MGI:1277167	Adgra1	adhesion G protein-coupled receptor A1	protein coding gene	7	+	139414090	139458004	52389
ENSMUSG00000025484	Ensembl Gene Model	MGI:1913128	Bet1l	Bet1 golgi vesicular membrane trafficking protein like	protein coding gene	7	-	140433297	140437306	54399
ENSMUSG00000025486	Ensembl Gene Model	MGI:1927665	Sirt3	sirtuin 3	protein coding gene	7	-	140443579	140462222	64384
ENSMUSG00000025511	Ensembl Gene Model	MGI:1928097	Tspan4	tetraspanin 4	protein coding gene	7	+	141055153	141073340	64540
ENSMUSG00000025576	Ensembl Gene Model	MGI:106368	Rbfox3	RNA binding protein, fox-1 homolog (C. elegans) 3	protein coding gene	11	-	118380588	118802423	52897
ENSMUSG00000025579	Ensembl Gene Model	MGI:95609	Gaa	glucosidase, alpha, acid	protein coding gene	11	+	119158789	119176284	14387
ENSMUSG00000025651	Ensembl Gene Model	MGI:107876	Uqcrc1	ubiquinol-cytochrome c reductase core protein 1	protein coding gene	9	+	108765701	108778691	22273
ENSMUSG00000025728	Ensembl Gene Model	MGI:1333114	Pigq	phosphatidylinositol glycan anchor biosynthesis, class Q	protein coding gene	17	-	26145394	26161855	14755
ENSMUSG00000025732	Ensembl Gene Model	MGI:1915491	Mcrip2	MAPK regulated corepressor interacting protein 2	protein coding gene	17	-	26082672	26087738	68241
ENSMUSG00000025735	Ensembl Gene Model	MGI:2384891	Rhbdl1	rhomboid like 1	protein coding gene	17	-	26053439	26056101	214951
ENSMUSG00000025745	Ensembl Gene Model	MGI:2135593	Hadha	hydroxyacyl-CoA dehydrogenase trifunctional multienzyme complex subunit alpha	protein coding gene	5	-	30324421	30359978	97212
ENSMUSG00000025789	Ensembl Gene Model	MGI:106020	St8sia2	ST8 alpha-N-acetyl-neuraminide alpha-2,8-sialyltransferase 2	protein coding gene	7	-	73588867	73663438	20450
ENSMUSG00000025791	Ensembl Gene Model	MGI:97565	Pgm1	phosphoglucomutase 1	protein coding gene	4	+	99786648	99844491	72157
ENSMUSG00000025867	Ensembl Gene Model	MGI:104726	Cplx2	complexin 2	protein coding gene	13	+	54519162	54531730	12890
ENSMUSG00000025875	Ensembl Gene Model	MGI:1921507	Tspan17	tetraspanin 17	protein coding gene	13	+	54937190	54944589	74257
ENSMUSG00000025876	Ensembl Gene Model	MGI:894682	Unc5a	unc-5 netrin receptor A	protein coding gene	13	+	55097224	55153831	107448
ENSMUSG00000025933	Ensembl Gene Model	MGI:1922962	Tmem14a	transmembrane protein 14A	protein coding gene	1	+	21288799	21300391	75712
ENSMUSG00000025938	Ensembl Gene Model	MGI:2443431	Slco5a1	solute carrier organic anion transporter family, member 5A1	protein coding gene	1	-	12936773	13062874	240726
ENSMUSG00000025963	Ensembl Gene Model	MGI:1923918	Mdh1b	malate dehydrogenase 1B, NAD (soluble)	protein coding gene	1	-	63737978	63769477	76668
ENSMUSG00000025969	Ensembl Gene Model	MGI:1100492	Nrp2	neuropilin 2	protein coding gene	1	+	62742476	62857851	18187
ENSMUSG00000026027	Ensembl Gene Model	MGI:2144047	Stradb	STE20-related kinase adaptor beta	protein coding gene	1	+	59012681	59034281	227154
ENSMUSG00000026087	Ensembl Gene Model	MGI:1333820	Mrpl30	mitochondrial ribosomal protein L30	protein coding gene	1	+	37929558	37937419	107734
ENSMUSG00000026090	Ensembl Gene Model	MGI:1919347	Cracdl	capping protein inhibiting regulator of actin like	protein coding gene	1	-	37650758	37759166	72097
ENSMUSG00000026095	Ensembl Gene Model	MGI:1917646	Asnsd1	asparagine synthetase domain containing 1	protein coding gene	1	-	53383776	53391911	70396
ENSMUSG00000026159	Ensembl Gene Model	MGI:1333754	Agfg1	ArfGAP with FG repeats 1	protein coding gene	1	+	82817204	82878903	15463
ENSMUSG00000026179	Ensembl Gene Model	MGI:1930773	Pnkd	paroxysmal nonkinesiogenic dyskinesia	protein coding gene	1	+	74324089	74392853	56695
ENSMUSG00000026185	Ensembl Gene Model	MGI:96440	Igfbp5	insulin-like growth factor binding protein 5	protein coding gene	1	-	72897224	72914024	16011
ENSMUSG00000026188	Ensembl Gene Model	MGI:2442781	Tmem169	transmembrane protein 169	protein coding gene	1	+	72323528	72342263	271711
ENSMUSG00000026198	Ensembl Gene Model	MGI:1921354	Abcb6	ATP-binding cassette, sub-family B (MDR/TAP), member 6	protein coding gene	1	-	75148361	75157036	74104
ENSMUSG00000026223	Ensembl Gene Model	MGI:1927594	Itm2c	integral membrane protein 2C	protein coding gene	1	+	85822231	85836419	64294
ENSMUSG00000026249	Ensembl Gene Model	MGI:101780	Serpine2	serine (or cysteine) peptidase inhibitor, clade E, member 2	protein coding gene	1	-	79772038	79836382	20720
ENSMUSG00000026255	Ensembl Gene Model	MGI:1921607	Efhd1	EF hand domain containing 1	protein coding gene	1	+	87192085	87238561	98363
ENSMUSG00000026279	Ensembl Gene Model	MGI:1914276	Thap4	THAP domain containing 4	protein coding gene	1	-	93633113	93682560	67026
ENSMUSG00000026347	Ensembl Gene Model	MGI:1919410	Tmem163	transmembrane protein 163	protein coding gene	1	-	127418079	127605758	72160
ENSMUSG00000026380	Ensembl Gene Model	MGI:2444691	Tfcp2l1	transcription factor CP2-like 1	protein coding gene	1	+	118555675	118612898	81879
ENSMUSG00000026399	Ensembl Gene Model	MGI:104850	Cd55	CD55 molecule, decay accelerating factor for complement	protein coding gene	1	-	130366764	130390481	13136
ENSMUSG00000026421	Ensembl Gene Model	MGI:88549	Csrp1	cysteine and glycine-rich protein 1	protein coding gene	1	+	135647799	135679970	13007
ENSMUSG00000026437	Ensembl Gene Model	MGI:97518	Cdk18	cyclin-dependent kinase 18	protein coding gene	1	-	132041285	132067433	18557
ENSMUSG00000026456	Ensembl Gene Model	MGI:1919267	Cyb5r1	cytochrome b5 reductase 1	protein coding gene	1	+	134333519	134339476	72017
ENSMUSG00000026473	Ensembl Gene Model	MGI:95739	Glul	glutamate-ammonia ligase (glutamine synthetase)	protein coding gene	1	+	153775690	153785469	14645
ENSMUSG00000026482	Ensembl Gene Model	MGI:107484	Rgl1	ral guanine nucleotide dissociation stimulator,-like 1	protein coding gene	1	-	152392513	152642089	19731
ENSMUSG00000026504	Ensembl Gene Model	MGI:1924066	Sdccag8	serologically defined colon cancer antigen 8	protein coding gene	1	+	176642226	176848003	76816
ENSMUSG00000026544	Ensembl Gene Model	MGI:1915690	Dusp23	dual specificity phosphatase 23	protein coding gene	1	-	172458331	172460529	68440
ENSMUSG00000026556	Ensembl Gene Model	MGI:2135272	Vangl2	VANGL planar cell polarity 2	protein coding gene	1	-	171828527	171856011	93840
ENSMUSG00000026600	Ensembl Gene Model	MGI:104665	Soat1	sterol O-acyltransferase 1	protein coding gene	1	-	156255678	156301898	20652
ENSMUSG00000026626	Ensembl Gene Model	MGI:2388479	Ppp2r5a	protein phosphatase 2, regulatory subunit B', alpha	protein coding gene	1	-	191084178	191129238	226849
ENSMUSG00000026659	Ensembl Gene Model	MGI:1890614	Dusp12	dual specificity phosphatase 12	protein coding gene	1	-	170701756	170713109	80915
ENSMUSG00000026739	Ensembl Gene Model	MGI:88174	Bmi1	Bmi1 polycomb ring finger oncogene	protein coding gene	2	+	18681829	18691440	12151
ENSMUSG00000026749	Ensembl Gene Model	MGI:1891638	Nek6	NIMA (never in mitosis gene a)-related expressed kinase 6	protein coding gene	2	+	38401655	38484618	59126
ENSMUSG00000026765	Ensembl Gene Model	MGI:1919147	Lypd6b	LY6/PLAUR domain containing 6B	protein coding gene	2	+	49677700	49838861	71897
ENSMUSG00000026773	Ensembl Gene Model	MGI:2181202	Pfkfb3	6-phosphofructo-2-kinase/fructose-2,6-biphosphatase 3	protein coding gene	2	-	11476241	11558882	170768
ENSMUSG00000026787	Ensembl Gene Model	MGI:95634	Gad2	glutamic acid decarboxylase 2	protein coding gene	2	+	22512262	22583889	14417
ENSMUSG00000026792	Ensembl Gene Model	MGI:2684789	Lrsam1	leucine rich repeat and sterile alpha motif containing 1	protein coding gene	2	-	32815228	32851626	227738
ENSMUSG00000026799	Ensembl Gene Model	MGI:1916225	Med27	mediator complex subunit 27	protein coding gene	2	+	29236831	29414805	68975
ENSMUSG00000026817	Ensembl Gene Model	MGI:87977	Ak1	adenylate kinase 1	protein coding gene	2	+	32511770	32525070	11636
ENSMUSG00000026833	Ensembl Gene Model	MGI:1860437	Olfm1	olfactomedin 1	protein coding gene	2	+	28083105	28120748	56177
ENSMUSG00000026841	Ensembl Gene Model	MGI:2138953	Fibcd1	fibrinogen C domain containing 1	protein coding gene	2	-	31703302	31736017	98970
ENSMUSG00000026842	Ensembl Gene Model	MGI:87859	Abl1	c-abl oncogene 1, non-receptor tyrosine kinase	protein coding gene	2	+	31578388	31694239	11350
ENSMUSG00000026853	Ensembl Gene Model	MGI:109501	Crat	carnitine acetyltransferase	protein coding gene	2	-	30290483	30305825	12908
ENSMUSG00000026856	Ensembl Gene Model	MGI:1914093	Dolpp1	dolichyl pyrophosphate phosphatase 1	protein coding gene	2	+	30282266	30290541	57170
ENSMUSG00000026857	Ensembl Gene Model	MGI:1913867	Ntmt1	N-terminal Xaa-Pro-Lys N-methyltransferase 1	protein coding gene	2	+	30697838	30713045	66617
ENSMUSG00000026880	Ensembl Gene Model	MGI:95403	Stom	stomatin	protein coding gene	2	-	35203998	35226988	13830
ENSMUSG00000026887	Ensembl Gene Model	MGI:1915121	Mrrf	mitochondrial ribosome recycling factor	protein coding gene	2	+	36026401	36080659	67871
ENSMUSG00000026888	Ensembl Gene Model	MGI:1355324	Grb14	growth factor receptor bound protein 14	protein coding gene	2	-	64742820	64853354	50915
ENSMUSG00000026890	Ensembl Gene Model	MGI:1306803	Lhx6	LIM homeobox protein 6	protein coding gene	2	-	35971965	35995420	16874
ENSMUSG00000026926	Ensembl Gene Model	MGI:1918568	Pmpca	peptidase (mitochondrial processing) alpha	protein coding gene	2	+	26279351	26287134	66865
ENSMUSG00000026932	Ensembl Gene Model	MGI:1915241	Nacc2	nucleus accumbens associated 2, BEN and BTB (POZ) domain containing	protein coding gene	2	-	25945547	26012823	67991
ENSMUSG00000026959	Ensembl Gene Model	MGI:95819	Grin1	glutamate receptor, ionotropic, NMDA1 (zeta 1)	protein coding gene	2	-	25181193	25209199	14810
ENSMUSG00000026988	Ensembl Gene Model	MGI:1919387	Wdsub1	WD repeat, SAM and U-box domain containing 1	protein coding gene	2	-	59682708	59712935	72137
ENSMUSG00000027016	Ensembl Gene Model	MGI:2444734	Zfp385b	zinc finger protein 385B	protein coding gene	2	-	77240966	77648050	241494
ENSMUSG00000027071	Ensembl Gene Model	MGI:1097160	P2rx3	purinergic receptor P2X, ligand-gated ion channel, 3	protein coding gene	2	-	84828927	84867806	228139
ENSMUSG00000027217	Ensembl Gene Model	MGI:1917186	Tspan18	tetraspanin 18	protein coding gene	2	-	93032105	93164850	241556
ENSMUSG00000027220	Ensembl Gene Model	MGI:1933945	Syt13	synaptotagmin XIII	protein coding gene	2	+	92745446	92786396	80976
ENSMUSG00000027221	Ensembl Gene Model	MGI:1924219	Chst1	carbohydrate sulfotransferase 1	protein coding gene	2	+	92430052	92445595	76969
ENSMUSG00000027223	Ensembl Gene Model	MGI:1309464	Mapk8ip1	mitogen-activated protein kinase 8 interacting protein 1	protein coding gene	2	-	92214021	92231608	19099
ENSMUSG00000027227	Ensembl Gene Model	MGI:98266	Sord	sorbitol dehydrogenase	protein coding gene	2	+	122065320	122095818	20322
ENSMUSG00000027230	Ensembl Gene Model	MGI:1347062	Creb3l1	cAMP responsive element binding protein 3-like 1	protein coding gene	2	-	91812673	91854515	26427
ENSMUSG00000027247	Ensembl Gene Model	MGI:2445003	Arhgap1	Rho GTPase activating protein 1	protein coding gene	2	+	91480463	91502670	228359
ENSMUSG00000027253	Ensembl Gene Model	MGI:2442252	Lrp4	low density lipoprotein receptor-related protein 4	protein coding gene	2	+	91287856	91344124	228357
ENSMUSG00000027282	Ensembl Gene Model	MGI:1929260	Mtch2	mitochondrial carrier 2	protein coding gene	2	+	90677499	90697154	56428
ENSMUSG00000027296	Ensembl Gene Model	MGI:1333822	Itpka	inositol 1,4,5-trisphosphate 3-kinase A	protein coding gene	2	+	119572818	119581734	228550
ENSMUSG00000027313	Ensembl Gene Model	MGI:1916315	Chac1	ChaC, cation transport regulator 1	protein coding gene	2	+	119181723	119184807	69065
ENSMUSG00000027332	Ensembl Gene Model	MGI:1929242	Ivd	isovaleryl coenzyme A dehydrogenase	protein coding gene	2	+	118692440	118713390	56357
ENSMUSG00000027333	Ensembl Gene Model	MGI:2445356	Smox	spermine oxidase	protein coding gene	2	+	131333624	131367103	228608
ENSMUSG00000027357	Ensembl Gene Model	MGI:1913836	Crls1	cardiolipin synthase 1	protein coding gene	2	+	132688586	132708705	66586
ENSMUSG00000027367	Ensembl Gene Model	MGI:2139090	Stard7	START domain containing 7	protein coding gene	2	+	127112138	127140852	99138
ENSMUSG00000027374	Ensembl Gene Model	MGI:1924971	Mrps5	mitochondrial ribosomal protein S5	protein coding gene	2	+	127429346	127445906	77721
ENSMUSG00000027381	Ensembl Gene Model	MGI:1197519	Bcl2l11	BCL2-like 11 (apoptosis facilitator)	protein coding gene	2	+	127967958	128004467	12125
ENSMUSG00000027406	Ensembl Gene Model	MGI:2158650	Idh3b	isocitrate dehydrogenase 3 (NAD+) beta	protein coding gene	2	-	130121229	130126371	170718
ENSMUSG00000027419	Ensembl Gene Model	MGI:97512	Pcsk2	proprotein convertase subtilisin/kexin type 2	protein coding gene	2	+	143388076	143658205	18549
ENSMUSG00000027452	Ensembl Gene Model	MGI:1915988	Acss1	acyl-CoA synthetase short-chain family member 1	protein coding gene	2	-	150460031	150510160	68738
ENSMUSG00000027488	Ensembl Gene Model	MGI:101772	Snta1	syntrophin, acidic 1	protein coding gene	2	-	154218234	154250004	20648
ENSMUSG00000027489	Ensembl Gene Model	MGI:1861721	Necab3	N-terminal EF-hand calcium binding protein 3	protein coding gene	2	-	154386319	154400810	56846
ENSMUSG00000027495	Ensembl Gene Model	MGI:1914267	Fam210b	family with sequence similarity 210, member B	protein coding gene	2	+	172187485	172197669	67017
ENSMUSG00000027506	Ensembl Gene Model	MGI:107749	Tpd52	tumor protein D52	protein coding gene	3	-	8991590	9069824	21985
ENSMUSG00000027509	Ensembl Gene Model	MGI:1913929	Rae1	ribonucleic acid export 1	protein coding gene	2	+	172841910	172857532	66679
ENSMUSG00000027531	Ensembl Gene Model	MGI:1933158	Impa1	inositol (myo)-1(or 4)-monophosphatase 1	protein coding gene	3	-	10377016	10396499	55980
ENSMUSG00000027560	Ensembl Gene Model	MGI:1924079	Dok5	docking protein 5	protein coding gene	2	+	170573727	170721689	76829
ENSMUSG00000027568	Ensembl Gene Model	MGI:97386	Ntsr1	neurotensin receptor 1	protein coding gene	2	+	180141769	180186772	18216
ENSMUSG00000027574	Ensembl Gene Model	MGI:1915372	Nkain4	Na+/K+ transporting ATPase interacting 4	protein coding gene	2	-	180576565	180596492	58237
ENSMUSG00000027599	Ensembl Gene Model	MGI:1921502	Armc1	armadillo repeat containing 1	protein coding gene	3	-	19185566	19217229	74252
ENSMUSG00000027603	Ensembl Gene Model	MGI:1913385	Ggt7	gamma-glutamyltransferase 7	protein coding gene	2	-	155332299	155356921	207182
ENSMUSG00000027605	Ensembl Gene Model	MGI:1890410	Acss2	acyl-CoA synthetase short-chain family member 2	protein coding gene	2	+	155359963	155404663	60525
ENSMUSG00000027610	Ensembl Gene Model	MGI:95852	Gss	glutathione synthetase	protein coding gene	2	-	155405101	155434730	14854
ENSMUSG00000027612	Ensembl Gene Model	MGI:1341867	Mmp24	matrix metallopeptidase 24	protein coding gene	2	+	155617262	155660286	17391
ENSMUSG00000027615	Ensembl Gene Model	MGI:2153839	Hps3	HPS3, biogenesis of lysosomal organelles complex 2 subunit 1	protein coding gene	3	-	20050109	20089479	12807
ENSMUSG00000027624	Ensembl Gene Model	MGI:103010	Epb41l1	erythrocyte membrane protein band 4.1 like 1	protein coding gene	2	+	156262829	156385134	13821
ENSMUSG00000027669	Ensembl Gene Model	MGI:104581	Gnb4	guanine nucleotide binding protein (G protein), beta 4	protein coding gene	3	-	32634481	32670734	14696
ENSMUSG00000027695	Ensembl Gene Model	MGI:109585	Pld1	phospholipase D1	protein coding gene	3	+	27992844	28187511	18805
ENSMUSG00000027698	Ensembl Gene Model	MGI:2443191	Nceh1	neutral cholesterol ester hydrolase 1	protein coding gene	3	+	27237153	27299112	320024
ENSMUSG00000027827	Ensembl Gene Model	MGI:109155	Kcnab1	potassium voltage-gated channel, shaker-related subfamily, beta member 1	protein coding gene	3	+	64856633	65285646	16497
ENSMUSG00000027849	Ensembl Gene Model	MGI:1859544	Syt6	synaptotagmin VI	protein coding gene	3	+	103482561	103552883	54524
ENSMUSG00000027852	Ensembl Gene Model	MGI:97376	Nras	neuroblastoma ras oncogene	protein coding gene	3	+	102965601	102975230	18176
ENSMUSG00000027864	Ensembl Gene Model	MGI:1277114	Ptgfrn	prostaglandin F2 receptor negative regulator	protein coding gene	3	-	100947548	101017594	19221
ENSMUSG00000027879	Ensembl Gene Model	MGI:1338759	Sec22b	SEC22 homolog B, vesicle trafficking protein	protein coding gene	3	+	97808543	97829634	20333
ENSMUSG00000027889	Ensembl Gene Model	MGI:88016	Ampd2	adenosine monophosphate deaminase 2	protein coding gene	3	-	107981378	107993967	109674
ENSMUSG00000027893	Ensembl Gene Model	MGI:2385184	Ahcyl1	S-adenosylhomocysteine hydrolase-like 1	protein coding gene	3	-	107570436	107603876	229709
ENSMUSG00000027894	Ensembl Gene Model	MGI:2442535	Slc6a17	solute carrier family 6 (neurotransmitter transporter), member 17	protein coding gene	3	-	107374864	107425334	229706
ENSMUSG00000027895	Ensembl Gene Model	MGI:96670	Kcnc4	potassium voltage gated channel, Shaw-related subfamily, member 4	protein coding gene	3	-	107345619	107366868	99738
ENSMUSG00000027962	Ensembl Gene Model	MGI:98926	Vcam1	vascular cell adhesion molecule 1	protein coding gene	3	-	115903669	115923337	22329
ENSMUSG00000027983	Ensembl Gene Model	MGI:1918769	Cyp2u1	cytochrome P450, family 2, subfamily u, polypeptide 1	protein coding gene	3	-	131084140	131097806	71519
ENSMUSG00000027984	Ensembl Gene Model	MGI:96009	Hadh	hydroxyacyl-Coenzyme A dehydrogenase	protein coding gene	3	-	131027068	131065750	15107
ENSMUSG00000027996	Ensembl Gene Model	MGI:108078	Sfrp2	secreted frizzled-related protein 2	protein coding gene	3	+	83673628	83681621	20319
ENSMUSG00000028003	Ensembl Gene Model	MGI:1891259	Lrat	lecithin-retinol acyltransferase (phosphatidylcholine-retinol-O-acyltransferase)	protein coding gene	3	-	82799889	82811281	79235
ENSMUSG00000028005	Ensembl Gene Model	MGI:1860604	Gucy1b1	guanylate cyclase 1, soluble, beta 1	protein coding gene	3	-	81939313	81981996	54195
ENSMUSG00000028007	Ensembl Gene Model	MGI:1923811	Snx7	sorting nexin 7	protein coding gene	3	-	117575296	117662585	76561
ENSMUSG00000028013	Ensembl Gene Model	MGI:1922026	Ppa2	pyrophosphatase (inorganic) 2	protein coding gene	3	+	133015871	133083996	74776
ENSMUSG00000028015	Ensembl Gene Model	MGI:2139628	Ctso	cathepsin O	protein coding gene	3	+	81839908	81864032	229445
ENSMUSG00000028020	Ensembl Gene Model	MGI:95751	Glrb	glycine receptor, beta subunit	protein coding gene	3	-	80750906	80820967	14658
ENSMUSG00000028051	Ensembl Gene Model	MGI:1298211	Hcn3	hyperpolarization-activated, cyclic nucleotide-gated K+ 3	protein coding gene	3	-	89054082	89067591	15168
ENSMUSG00000028059	Ensembl Gene Model	MGI:103264	Arhgef2	rho/rac guanine nucleotide exchange factor (GEF) 2	protein coding gene	3	+	88513273	88555359	16800
ENSMUSG00000028101	Ensembl Gene Model	MGI:1913126	Pias3	protein inhibitor of activated STAT 3	protein coding gene	3	+	96603700	96613386	229615
ENSMUSG00000028145	Ensembl Gene Model	MGI:1923028	Them4	thioesterase superfamily member 4	protein coding gene	3	+	94217415	94239847	75778
ENSMUSG00000028164	Ensembl Gene Model	MGI:88175	Manba	mannosidase, beta A, lysosomal	protein coding gene	3	+	135191372	135277165	110173
ENSMUSG00000028221	Ensembl Gene Model	MGI:1919769	Pip4p2	phosphatidylinositol-4,5-bisphosphate 4-phosphatase 2	protein coding gene	4	+	14864076	14915176	72519
ENSMUSG00000028222	Ensembl Gene Model	MGI:88248	Calb1	calbindin 1	protein coding gene	4	+	15881264	15906709	12307
ENSMUSG00000028266	Ensembl Gene Model	MGI:109360	Lmo4	LIM domain only 4	protein coding gene	3	-	143894291	143910981	16911
ENSMUSG00000028291	Ensembl Gene Model	MGI:1889364	Akirin2	akirin 2	protein coding gene	4	+	34550937	34566908	433693
ENSMUSG00000028347	Ensembl Gene Model	MGI:1926810	Tmeff1	transmembrane protein with EGF-like and two follistatin-like domains 1	protein coding gene	4	+	48585174	48663131	230157
ENSMUSG00000028373	Ensembl Gene Model	MGI:1889277	Astn2	astrotactin 2	protein coding gene	4	-	65299040	66322774	56079
ENSMUSG00000028393	Ensembl Gene Model	MGI:96853	Alad	aminolevulinate, delta-, dehydratase	protein coding gene	4	-	62427406	62438155	17025
ENSMUSG00000028434	Ensembl Gene Model	MGI:1859149	Epb41l4b	erythrocyte membrane protein band 4.1 like 4b	protein coding gene	4	-	56991972	57143437	54357
ENSMUSG00000028444	Ensembl Gene Model	MGI:99605	Cntfr	ciliary neurotrophic factor receptor	protein coding gene	4	-	41657498	41697089	12804
ENSMUSG00000028479	Ensembl Gene Model	MGI:1354951	Gne	glucosamine (UDP-N-acetyl)-2-epimerase/N-acetylmannosamine kinase	protein coding gene	4	-	44034075	44084177	50798
ENSMUSG00000028483	Ensembl Gene Model	MGI:1916338	Snapc3	small nuclear RNA activating complex, polypeptide 3	protein coding gene	4	+	83335961	83385913	77634
ENSMUSG00000028527	Ensembl Gene Model	MGI:87979	Ak4	adenylate kinase 4	protein coding gene	4	+	101276474	101324192	11639
ENSMUSG00000028541	Ensembl Gene Model	MGI:1858493	B4galt2	UDP-Gal:betaGlcNAc beta 1,4- galactosyltransferase, polypeptide 2	protein coding gene	4	-	117730197	117740759	53418
ENSMUSG00000028542	Ensembl Gene Model	MGI:95760	Slc6a9	solute carrier family 6 (neurotransmitter transporter, glycine), member 9	protein coding gene	4	+	117692240	117726502	14664
ENSMUSG00000028573	Ensembl Gene Model	MGI:1922828	Fggy	FGGY carbohydrate kinase domain containing	protein coding gene	4	+	95445744	95815176	75578
ENSMUSG00000028583	Ensembl Gene Model	MGI:103098	Pdpn	podoplanin	protein coding gene	4	-	142994001	143026134	14726
ENSMUSG00000028622	Ensembl Gene Model	MGI:1926268	Mrpl37	mitochondrial ribosomal protein L37	protein coding gene	4	-	106913071	106924063	56280
ENSMUSG00000028633	Ensembl Gene Model	MGI:1858304	Ctps	cytidine 5'-triphosphate synthase	protein coding gene	4	-	120397065	120427473	51797
ENSMUSG00000028645	Ensembl Gene Model	MGI:95755	Slc2a1	solute carrier family 2 (facilitated glucose transporter), member 1	protein coding gene	4	+	118965942	118994527	20525
ENSMUSG00000028655	Ensembl Gene Model	MGI:1923824	Mfsd2a	major facilitator superfamily domain containing 2A	protein coding gene	4	-	122840643	122854981	76574
ENSMUSG00000028661	Ensembl Gene Model	MGI:109378	Epha8	Eph receptor A8	protein coding gene	4	-	136656730	136684127	13842
ENSMUSG00000028672	Ensembl Gene Model	MGI:96158	Hmgcl	3-hydroxy-3-methylglutaryl-Coenzyme A lyase	protein coding gene	4	+	135673759	135689928	15356
ENSMUSG00000028680	Ensembl Gene Model	MGI:109604	Plk3	polo like kinase 3	protein coding gene	4	-	116985852	116991160	12795
ENSMUSG00000028693	Ensembl Gene Model	MGI:1355328	Nasp	nuclear autoantigenic sperm protein (histone-binding)	protein coding gene	4	-	116458249	116485138	50927
ENSMUSG00000028710	Ensembl Gene Model	MGI:2180560	Atpaf1	ATP synthase mitochondrial F1 complex assembly factor 1	protein coding gene	4	+	115642025	115669120	230649
ENSMUSG00000028737	Ensembl Gene Model	MGI:2443883	Aldh4a1	aldehyde dehydrogenase 4 family, member A1	protein coding gene	4	+	139350177	139377001	212647
ENSMUSG00000028745	Ensembl Gene Model	MGI:104652	Capzb	capping actin protein of muscle Z-line subunit beta	protein coding gene	4	+	138920210	139019129	12345
ENSMUSG00000028747	Ensembl Gene Model	MGI:1196627	Htr6	5-hydroxytryptamine (serotonin) receptor 6	protein coding gene	4	-	138788419	138802881	15565
ENSMUSG00000028766	Ensembl Gene Model	MGI:87983	Alpl	alkaline phosphatase, liver/bone/kidney	protein coding gene	4	-	137469044	137523695	11647
ENSMUSG00000028782	Ensembl Gene Model	MGI:2451244	Adgrb2	adhesion G protein-coupled receptor B2	protein coding gene	4	+	129878663	129916426	230775
ENSMUSG00000028793	Ensembl Gene Model	MGI:1922484	Rnf19b	ring finger protein 19B	protein coding gene	4	+	128951871	128978319	75234
ENSMUSG00000028803	Ensembl Gene Model	MGI:1921802	Nipal3	NIPA-like domain containing 3	protein coding gene	4	-	135173454	135222283	74552
ENSMUSG00000028836	Ensembl Gene Model	MGI:106637	Slc30a2	solute carrier family 30 (zinc transporter), member 2	protein coding gene	4	+	134070492	134081795	230810
ENSMUSG00000028838	Ensembl Gene Model	MGI:1888742	Extl1	exostosin-like glycosyltransferase 1	protein coding gene	4	-	134083684	134099893	56219
ENSMUSG00000028863	Ensembl Gene Model	MGI:1917338	Meaf6	MYST/Esa1-associated factor 6	protein coding gene	4	+	124978927	125007031	70088
ENSMUSG00000028893	Ensembl Gene Model	MGI:2651874	Sesn2	sestrin 2	protein coding gene	4	-	132220115	132237767	230784
ENSMUSG00000028909	Ensembl Gene Model	MGI:1321151	Ptpru	protein tyrosine phosphatase, receptor type, U	protein coding gene	4	-	131495768	131565599	19273
ENSMUSG00000028919	Ensembl Gene Model	MGI:1925912	Arhgef19	Rho guanine nucleotide exchange factor (GEF) 19	protein coding gene	4	+	140966810	140984875	213649
ENSMUSG00000028926	Ensembl Gene Model	MGI:894318	Cdk14	cyclin-dependent kinase 14	protein coding gene	5	-	4853384	5430251	18647
ENSMUSG00000028931	Ensembl Gene Model	MGI:109239	Kcnab2	potassium voltage-gated channel, shaker-related subfamily, beta member 2	protein coding gene	4	-	152475201	152562006	16498
ENSMUSG00000028936	Ensembl Gene Model	MGI:99262	Rpl22	ribosomal protein L22	protein coding gene	4	+	152410199	152418528	19934
ENSMUSG00000028957	Ensembl Gene Model	MGI:1277134	Per3	period circadian clock 3	protein coding gene	4	-	151088109	151129122	18628
ENSMUSG00000028971	Ensembl Gene Model	MGI:109538	Cort	cortistatin	protein coding gene	4	-	149209491	149211220	12854
ENSMUSG00000028982	Ensembl Gene Model	MGI:1917806	Slc25a33	solute carrier family 25, member 33	protein coding gene	4	-	149828493	149858734	70556
ENSMUSG00000029032	Ensembl Gene Model	MGI:2446219	Arhgef16	Rho guanine nucleotide exchange factor (GEF) 16	protein coding gene	4	-	154362926	154384535	230972
ENSMUSG00000029050	Ensembl Gene Model	MGI:98310	Ski	ski sarcoma viral oncogene homolog (avian)	protein coding gene	4	-	155238532	155306992	20481
ENSMUSG00000029054	Ensembl Gene Model	MGI:95622	Gabrd	gamma-aminobutyric acid (GABA) A receptor, subunit delta	protein coding gene	4	-	155469436	155482549	14403
ENSMUSG00000029055	Ensembl Gene Model	MGI:2443078	Plch2	phospholipase C, eta 2	protein coding gene	4	-	155067572	155141241	269615
ENSMUSG00000029063	Ensembl Gene Model	MGI:2183149	Nadk	NAD kinase	protein coding gene	4	+	155646838	155675458	192185
ENSMUSG00000029090	Ensembl Gene Model	MGI:1917943	Adgra3	adhesion G protein-coupled receptor A3	protein coding gene	5	-	50117293	50216338	70693
ENSMUSG00000029095	Ensembl Gene Model	MGI:2385758	Ablim2	actin-binding LIM protein 2	protein coding gene	5	+	35915224	36042317	231148
ENSMUSG00000029101	Ensembl Gene Model	MGI:1918979	Rgs12	regulator of G-protein signaling 12	protein coding gene	5	+	35106789	35196988	71729
ENSMUSG00000029119	Ensembl Gene Model	MGI:1195262	Man2b2	mannosidase 2, alpha B2	protein coding gene	5	-	36964265	36987997	17160
ENSMUSG00000029121	Ensembl Gene Model	MGI:107793	Crmp1	collapsin response mediator protein 1	protein coding gene	5	+	37399402	37449507	12933
ENSMUSG00000029123	Ensembl Gene Model	MGI:1927552	Stk32b	serine/threonine kinase 32B	protein coding gene	5	-	37604169	37874497	64293
ENSMUSG00000029151	Ensembl Gene Model	MGI:1345280	Slc30a3	solute carrier family 30 (zinc transporter), member 3	protein coding gene	5	-	31243450	31265581	22784
ENSMUSG00000029153	Ensembl Gene Model	MGI:1916377	Ociad2	OCIA domain containing 2	protein coding gene	5	-	73479541	73496290	433904
ENSMUSG00000029156	Ensembl Gene Model	MGI:1346523	Sgcb	sarcoglycan, beta (dystrophin-associated glycoprotein)	protein coding gene	5	-	73790092	73805080	24051
ENSMUSG00000029171	Ensembl Gene Model	MGI:97564	Pgm2	phosphoglucomutase 2	protein coding gene	5	+	64250293	64285694	66681
ENSMUSG00000029174	Ensembl Gene Model	MGI:1889508	Tbc1d1	TBC1 domain family, member 1	protein coding gene	5	+	64313648	64508829	57915
ENSMUSG00000029189	Ensembl Gene Model	MGI:1916941	Sel1l3	sel-1 suppressor of lin-12-like 3 (C. elegans)	protein coding gene	5	-	53264425	53370794	231238
ENSMUSG00000029213	Ensembl Gene Model	MGI:1343485	Commd8	COMM domain containing 8	protein coding gene	5	-	72313919	72325532	27784
ENSMUSG00000029228	Ensembl Gene Model	MGI:1278335	Lnx1	ligand of numb-protein X 1	protein coding gene	5	-	74753108	74863573	16924
ENSMUSG00000029270	Ensembl Gene Model	MGI:1914516	Dipk1a	divergent protein kinase domain 1A	protein coding gene	5	-	108055919	108134951	67266
ENSMUSG00000029310	Ensembl Gene Model	MGI:1921417	Nudt9	nudix (nucleoside diphosphate linked moiety X)-type motif 9	protein coding gene	5	+	104194172	104213245	74167
ENSMUSG00000029326	Ensembl Gene Model	MGI:1915120	Enoph1	enolase-phosphatase 1	protein coding gene	5	+	100187844	100216619	67870
ENSMUSG00000029364	Ensembl Gene Model	MGI:2144041	Wsb2	WD repeat and SOCS box-containing 2	protein coding gene	5	+	117495370	117516666	59043
ENSMUSG00000029394	Ensembl Gene Model	MGI:1202069	Cdk2ap1	CDK2 (cyclin-dependent kinase 2)-associated protein 1	protein coding gene	5	-	124483502	124492691	13445
ENSMUSG00000029436	Ensembl Gene Model	MGI:1346076	Mmp17	matrix metallopeptidase 17	protein coding gene	5	+	129661233	129688163	23948
ENSMUSG00000029446	Ensembl Gene Model	MGI:97788	Psph	phosphoserine phosphatase	protein coding gene	5	-	129842622	129864318	100678
ENSMUSG00000029449	Ensembl Gene Model	MGI:1345629	Rhof	ras homolog family member F (in filopodia)	protein coding gene	5	-	123256243	123279871	23912
ENSMUSG00000029455	Ensembl Gene Model	MGI:99600	Aldh2	aldehyde dehydrogenase 2, mitochondrial	protein coding gene	5	-	121704090	121731887	11669
ENSMUSG00000029544	Ensembl Gene Model	MGI:1352750	Cabp1	calcium binding protein 1	protein coding gene	5	-	115306750	115332440	29867
ENSMUSG00000029552	Ensembl Gene Model	MGI:105081	Tes	testin LIM domain protein	protein coding gene	6	+	17065148	17105824	21753
ENSMUSG00000029581	Ensembl Gene Model	MGI:1352745	Fscn1	fascin actin-bundling protein 1	protein coding gene	5	+	142946110	142958944	14086
ENSMUSG00000029591	Ensembl Gene Model	MGI:109352	Ung	uracil DNA glycosylase	protein coding gene	5	+	114268447	114277384	22256
ENSMUSG00000029598	Ensembl Gene Model	MGI:1919022	Plbd2	phospholipase B domain containing 2	protein coding gene	5	-	120621958	120641688	71772
ENSMUSG00000029602	Ensembl Gene Model	MGI:1330842	Rasal1	RAS protein activator like 1 (GAP1 like)	protein coding gene	5	+	120786877	120817662	19415
ENSMUSG00000029603	Ensembl Gene Model	MGI:1352744	Dtx1	deltex 1, E3 ubiquitin ligase	protein coding gene	5	-	120818268	120849755	14357
ENSMUSG00000029608	Ensembl Gene Model	MGI:102788	Rph3a	rabphilin 3A	protein coding gene	5	-	121078562	121148155	19894
ENSMUSG00000029635	Ensembl Gene Model	MGI:1196224	Cdk8	cyclin-dependent kinase 8	protein coding gene	5	+	146168040	146239684	264064
ENSMUSG00000029636	Ensembl Gene Model	MGI:2658986	Wasf3	WASP family, member 3	protein coding gene	5	+	146321816	146410425	245880
ENSMUSG00000029674	Ensembl Gene Model	MGI:104572	Limk1	LIM-domain containing, protein kinase	protein coding gene	5	-	134684893	134717452	16885
ENSMUSG00000029675	Ensembl Gene Model	MGI:95317	Eln	elastin	protein coding gene	5	-	134731447	134776177	13717
ENSMUSG00000029713	Ensembl Gene Model	MGI:95784	Gnb2	guanine nucleotide binding protein (G protein), beta 2	protein coding gene	5	-	137526389	137531772	14693
ENSMUSG00000029723	Ensembl Gene Model	MGI:1926079	Spacdr	sperm acrosome developmental regulator	protein coding gene	5	+	137744231	137766715	78829
ENSMUSG00000029752	Ensembl Gene Model	MGI:1350929	Asns	asparagine synthetase	protein coding gene	6	-	7675165	7693209	27053
ENSMUSG00000029754	Ensembl Gene Model	MGI:101927	Dlx6	distal-less homeobox 6	protein coding gene	6	+	6863334	6867970	13396
ENSMUSG00000029772	Ensembl Gene Model	MGI:1921590	Ahcyl2	S-adenosylhomocysteine hydrolase-like 2	protein coding gene	6	+	29768378	29912309	74340
ENSMUSG00000029777	Ensembl Gene Model	MGI:2449057	Gars	glycyl-tRNA synthetase	protein coding gene	6	+	55014992	55056485	353172
ENSMUSG00000029778	Ensembl Gene Model	MGI:108449	Adcyap1r1	adenylate cyclase activating polypeptide 1 receptor 1	protein coding gene	6	+	55428963	55478436	11517
ENSMUSG00000029821	Ensembl Gene Model	MGI:1889850	Gsdme	gasdermin E	protein coding gene	6	-	50167013	50240837	54722
ENSMUSG00000029832	Ensembl Gene Model	MGI:1339958	Nfe2l3	nuclear factor, erythroid derived 2, like 3	protein coding gene	6	+	51409650	51435748	18025
ENSMUSG00000029864	Ensembl Gene Model	MGI:1923513	Gstk1	glutathione S-transferase kappa 1	protein coding gene	6	+	42222869	42227375	76263
ENSMUSG00000029993	Ensembl Gene Model	MGI:1913290	Nfu1	NFU1 iron-sulfur cluster scaffold	protein coding gene	6	+	86986218	87005443	56748
ENSMUSG00000029998	Ensembl Gene Model	MGI:1914131	Pcyox1	prenylcysteine oxidase 1	protein coding gene	6	-	86362988	86374132	66881
ENSMUSG00000029999	Ensembl Gene Model	MGI:98724	Tgfa	transforming growth factor alpha	protein coding gene	6	+	86172205	86252701	21802
ENSMUSG00000030007	Ensembl Gene Model	MGI:107184	Cct7	chaperonin containing Tcp1, subunit 7 (eta)	protein coding gene	6	+	85428496	85445457	12468
ENSMUSG00000030036	Ensembl Gene Model	MGI:1929872	Mogs	mannosyl-oligosaccharide glucosidase	protein coding gene	6	+	83092477	83095879	57377
ENSMUSG00000030042	Ensembl Gene Model	MGI:1914229	Pole4	polymerase (DNA-directed), epsilon 4 (p12 subunit)	protein coding gene	6	-	82593513	82629985	66979
ENSMUSG00000030061	Ensembl Gene Model	MGI:1341217	Uba3	ubiquitin-like modifier activating enzyme 3	protein coding gene	6	-	97160631	97182608	22200
ENSMUSG00000030074	Ensembl Gene Model	MGI:2682940	Gxylt2	glucoside xylosyltransferase 2	protein coding gene	6	+	100681638	100787738	232313
ENSMUSG00000030087	Ensembl Gene Model	MGI:1929988	Klf15	Kruppel-like factor 15	protein coding gene	6	+	90439558	90452220	66277
ENSMUSG00000030088	Ensembl Gene Model	MGI:1340024	Aldh1l1	aldehyde dehydrogenase 1 family, member L1	protein coding gene	6	+	90527751	90576153	107747
ENSMUSG00000030089	Ensembl Gene Model	MGI:1918949	Slc41a3	solute carrier family 41, member 3	protein coding gene	6	+	90581707	90623394	71699
ENSMUSG00000030093	Ensembl Gene Model	MGI:98961	Wnt7a	wingless-type MMTV integration site family, member 7A	protein coding gene	6	-	91340963	91388335	22421
ENSMUSG00000030095	Ensembl Gene Model	MGI:1921372	Tmem43	transmembrane protein 43	protein coding gene	6	+	91450689	91465445	74122
ENSMUSG00000030105	Ensembl Gene Model	MGI:1914416	Arl8b	ADP-ribosylation factor-like 8B	protein coding gene	6	+	108760020	108800684	67166
ENSMUSG00000030110	Ensembl Gene Model	MGI:97902	Ret	ret proto-oncogene	protein coding gene	6	-	118128706	118174679	19713
ENSMUSG00000030123	Ensembl Gene Model	MGI:2154244	Plxnd1	plexin D1	protein coding gene	6	-	115931772	115971966	67784
ENSMUSG00000030134	Ensembl Gene Model	MGI:1917977	Rasgef1a	RasGEF domain family, member 1A	protein coding gene	6	+	117988466	118068507	70727
ENSMUSG00000030189	Ensembl Gene Model	MGI:2137670	Ybx3	Y box protein 3	protein coding gene	6	-	131341821	131365413	56449
ENSMUSG00000030199	Ensembl Gene Model	MGI:109336	Etv6	ets variant 6	protein coding gene	6	+	134012663	134247121	14011
ENSMUSG00000030207	Ensembl Gene Model	MGI:1921775	Fam234b	family with sequence similarity 234, member B	protein coding gene	6	+	135173881	135213240	74525
ENSMUSG00000030246	Ensembl Gene Model	MGI:96763	Ldhb	lactate dehydrogenase B	protein coding gene	6	-	142435975	142453683	16832
ENSMUSG00000030255	Ensembl Gene Model	MGI:1353511	Sspn	sarcospan	protein coding gene	6	+	145877367	145910949	16651
ENSMUSG00000030256	Ensembl Gene Model	MGI:1930704	Bhlhe41	basic helix-loop-helix family, member e41	protein coding gene	6	-	145803969	145811146	79362
ENSMUSG00000030268	Ensembl Gene Model	MGI:104861	Bcat1	branched chain aminotransferase 1, cytosolic	protein coding gene	6	-	144939561	145021883	12035
ENSMUSG00000030272	Ensembl Gene Model	MGI:1098535	Camk1	calcium/calmodulin-dependent protein kinase I	protein coding gene	6	-	113311085	113320883	52163
ENSMUSG00000030284	Ensembl Gene Model	MGI:2152539	Creld1	cysteine-rich with EGF-like domains 1	protein coding gene	6	+	113460317	113470304	171508
ENSMUSG00000030301	Ensembl Gene Model	MGI:1914265	Ccdc91	coiled-coil domain containing 91	protein coding gene	6	+	147377326	147534110	67015
ENSMUSG00000030307	Ensembl Gene Model	MGI:95630	Slc6a11	solute carrier family 6 (neurotransmitter transporter, GABA), member 11	protein coding gene	6	+	114108202	114226847	243616
ENSMUSG00000030310	Ensembl Gene Model	MGI:95627	Slc6a1	solute carrier family 6 (neurotransmitter transporter, GABA), member 1	protein coding gene	6	+	114259596	114294491	232333
ENSMUSG00000030317	Ensembl Gene Model	MGI:109125	Timp4	tissue inhibitor of metalloproteinase 4	protein coding gene	6	-	115221405	115229166	110595
ENSMUSG00000030350	Ensembl Gene Model	MGI:3043083	Prmt8	protein arginine N-methyltransferase 8	protein coding gene	6	-	127665972	127746430	381813
ENSMUSG00000030352	Ensembl Gene Model	MGI:1924558	Tspan9	tetraspanin 9	protein coding gene	6	-	127938359	128120541	109246
ENSMUSG00000030374	Ensembl Gene Model	MGI:2142346	Strn4	striatin, calmodulin binding protein 4	protein coding gene	7	+	16549814	16574856	97387
ENSMUSG00000030376	Ensembl Gene Model	MGI:107996	Slc8a2	solute carrier family 8 (sodium/calcium exchanger), member 2	protein coding gene	7	+	15863751	15894988	110891
ENSMUSG00000030403	Ensembl Gene Model	MGI:109268	Vasp	vasodilator-stimulated phosphoprotein	protein coding gene	7	-	18990854	19005742	22323
ENSMUSG00000030410	Ensembl Gene Model	MGI:94907	Dmwd	dystrophia myotonica-containing WD repeat motif	protein coding gene	7	+	18810152	18816701	13401
ENSMUSG00000030471	Ensembl Gene Model	MGI:1919227	Zdhhc13	zinc finger, DHHC domain containing 13	protein coding gene	7	+	48438751	48477188	243983
ENSMUSG00000030499	Ensembl Gene Model	MGI:2385276	Kctd15	potassium channel tetramerisation domain containing 15	protein coding gene	7	-	34338439	34356157	233107
ENSMUSG00000030518	Ensembl Gene Model	MGI:1917888	Fam189a1	family with sequence similarity 189, member A1	protein coding gene	7	-	64405839	64806276	70638
ENSMUSG00000030539	Ensembl Gene Model	MGI:107559	Sema4b	sema domain, immunoglobulin domain (Ig), transmembrane domain (TM) and short cytoplasmic domain, (semaphorin) 4B	protein coding gene	7	+	79836589	79876275	20352
ENSMUSG00000030541	Ensembl Gene Model	MGI:96414	Idh2	isocitrate dehydrogenase 2 (NADP+), mitochondrial	protein coding gene	7	-	79744594	79765140	269951
ENSMUSG00000030554	Ensembl Gene Model	MGI:2661187	Synm	synemin, intermediate filament protein	protein coding gene	7	-	67379909	67409490	233335
ENSMUSG00000030584	Ensembl Gene Model	MGI:1352748	Dpf1	double PHD fingers 1	protein coding gene	7	+	29003366	29017017	29861
ENSMUSG00000030605	Ensembl Gene Model	MGI:102768	Mfge8	milk fat globule EGF and factor V/VIII domain containing	protein coding gene	7	-	78783516	78798808	17304
ENSMUSG00000030621	Ensembl Gene Model	MGI:1916679	Me3	malic enzyme 3, NADP(+)-dependent, mitochondrial	protein coding gene	7	+	89281600	89503567	109264
ENSMUSG00000030659	Ensembl Gene Model	MGI:1858179	Nucb2	nucleobindin 2	protein coding gene	7	+	116103604	116139819	53322
ENSMUSG00000030685	Ensembl Gene Model	MGI:1923739	Kctd13	potassium channel tetramerisation domain containing 13	protein coding gene	7	+	126528051	126544781	233877
ENSMUSG00000030711	Ensembl Gene Model	MGI:102896	Sult1a1	sulfotransferase family 1A, phenol-preferring, member 1	protein coding gene	7	-	126272037	126275604	20887
ENSMUSG00000030717	Ensembl Gene Model	MGI:1891834	Nupr1	nuclear protein transcription regulator 1	protein coding gene	7	-	126222418	126224642	56312
ENSMUSG00000030731	Ensembl Gene Model	MGI:99665	Syt3	synaptotagmin III	protein coding gene	7	+	44033526	44049611	20981
ENSMUSG00000030738	Ensembl Gene Model	MGI:1926966	Eif3c	eukaryotic translation initiation factor 3, subunit C	protein coding gene	7	-	126146083	126165538	56347
ENSMUSG00000030747	Ensembl Gene Model	MGI:1915050	Dgat2	diacylglycerol O-acyltransferase 2	protein coding gene	7	-	98802870	98831920	67800
ENSMUSG00000030760	Ensembl Gene Model	MGI:1913440	Acer3	alkaline ceramidase 3	protein coding gene	7	-	97863015	97970415	66190
ENSMUSG00000030785	Ensembl Gene Model	MGI:104649	Cox6a2	cytochrome c oxidase subunit 6A2	protein coding gene	7	-	127804607	127805538	12862
ENSMUSG00000030844	Ensembl Gene Model	MGI:1915115	Rgs10	regulator of G-protein signalling 10	protein coding gene	7	-	127975345	128020482	67865
ENSMUSG00000030849	Ensembl Gene Model	MGI:95523	Fgfr2	fibroblast growth factor receptor 2	protein coding gene	7	-	129764181	129868538	14183
ENSMUSG00000030854	Ensembl Gene Model	MGI:97807	Ptpn5	protein tyrosine phosphatase, non-receptor type 5	protein coding gene	7	-	46727543	46783432	19259
ENSMUSG00000030872	Ensembl Gene Model	MGI:1921355	Gga2	golgi associated, gamma adaptin ear containing, ARF binding protein 2	protein coding gene	7	-	121585945	121620421	74105
ENSMUSG00000030876	Ensembl Gene Model	MGI:1914862	Mettl9	methyltransferase like 9	protein coding gene	7	+	120633668	120677552	59052
ENSMUSG00000030879	Ensembl Gene Model	MGI:1351608	Mrpl17	mitochondrial ribosomal protein L17	protein coding gene	7	-	105452989	105460294	27397
ENSMUSG00000030894	Ensembl Gene Model	MGI:1336194	Tpp1	tripeptidyl peptidase I	protein coding gene	7	-	105394018	105401442	12751
ENSMUSG00000030898	Ensembl Gene Model	MGI:99479	Cckbr	cholecystokinin B receptor	protein coding gene	7	+	105074882	105085546	12426
ENSMUSG00000030946	Ensembl Gene Model	MGI:1923679	Lhpp	phospholysine phosphohistidine inorganic pyrophosphate phosphatase	protein coding gene	7	+	132212367	132308149	76429
ENSMUSG00000030970	Ensembl Gene Model	MGI:1201686	Ctbp2	C-terminal binding protein 2	protein coding gene	7	-	132589292	132726083	13017
ENSMUSG00000031023	Ensembl Gene Model	MGI:3041226	Akip1	A kinase (PRKA) interacting protein 1	protein coding gene	7	+	109302897	109311396	57373
ENSMUSG00000031066	Ensembl Gene Model	MGI:2384312	Usp11	ubiquitin specific peptidase 11	protein coding gene	X	+	20570148	20586778	236733
ENSMUSG00000031090	Ensembl Gene Model	MGI:1926164	Nadsyn1	NAD synthetase 1	protein coding gene	7	-	143349321	143376586	78914
ENSMUSG00000031129	Ensembl Gene Model	MGI:2679732	Slc9a9	solute carrier family 9 (sodium/hydrogen exchanger), member 9	protein coding gene	9	+	94551962	95112498	331004
ENSMUSG00000031146	Ensembl Gene Model	MGI:1298382	Plp2	proteolipid protein 2	protein coding gene	X	-	7534180	7537629	18824
ENSMUSG00000031156	Ensembl Gene Model	MGI:1345297	Slc35a2	solute carrier family 35 (UDP-galactose transporter), member A2	protein coding gene	X	+	7750267	7760731	22232
ENSMUSG00000031169	Ensembl Gene Model	MGI:1890212	Porcn	porcupine O-acyltransferase	protein coding gene	X	-	8060087	8072764	53627
ENSMUSG00000031176	Ensembl Gene Model	MGI:1914367	Dynlt3	dynein light chain Tctex-type 3	protein coding gene	X	-	9520509	9529222	67117
ENSMUSG00000031217	Ensembl Gene Model	MGI:102708	Efnb1	ephrin B1	protein coding gene	X	+	98179736	98192597	13641
ENSMUSG00000031232	Ensembl Gene Model	MGI:1914325	Magt1	magnesium transporter 1	protein coding gene	X	-	105011690	105055408	67075
ENSMUSG00000031239	Ensembl Gene Model	MGI:107706	Itm2a	integral membrane protein 2A	protein coding gene	X	-	106440801	106446966	16431
ENSMUSG00000031242	Ensembl Gene Model	MGI:1914278	Chmp1b2	charged multivesicular body protein 1B2	protein coding gene	X	-	106826357	106859940	67028
ENSMUSG00000031297	Ensembl Gene Model	MGI:1100521	Slc7a3	solute carrier family 7 (cationic amino acid transporter, y+ system), member 3	protein coding gene	X	-	100122816	100129626	11989
ENSMUSG00000031373	Ensembl Gene Model	MGI:1926249	Car5b	carbonic anhydrase 5b, mitochondrial	protein coding gene	X	-	162759818	162810993	56078
ENSMUSG00000031380	Ensembl Gene Model	MGI:108037	Vegfd	vascular endothelial growth factor D	protein coding gene	X	+	163156374	163185646	14205
ENSMUSG00000031388	Ensembl Gene Model	MGI:1915255	Naa10	N(alpha)-acetyltransferase 10, NatA catalytic subunit	protein coding gene	X	-	72960479	72965550	56292
ENSMUSG00000031431	Ensembl Gene Model	MGI:1196284	Tsc22d3	TSC22 domain family, member 3	protein coding gene	X	-	139440277	139501271	14605
ENSMUSG00000031453	Ensembl Gene Model	MGI:1197013	Rasa3	RAS p21 protein activator 3	protein coding gene	8	-	13617218	13727590	19414
ENSMUSG00000031467	Ensembl Gene Model	MGI:1196345	Agpat5	1-acylglycerol-3-phosphate O-acyltransferase 5 (lysophosphatidic acid acyltransferase, epsilon)	protein coding gene	8	+	18896295	18934429	52123
ENSMUSG00000031490	Ensembl Gene Model	MGI:103267	Eif4ebp1	eukaryotic translation initiation factor 4E binding protein 1	protein coding gene	8	+	27750355	27765684	13685
ENSMUSG00000031513	Ensembl Gene Model	MGI:1915442	Leprotl1	leptin receptor overlapping transcript-like 1	protein coding gene	8	-	34602726	34613893	68192
ENSMUSG00000031521	Ensembl Gene Model	MGI:104873	Aga	aspartylglucosaminidase	protein coding gene	8	+	53964762	53976456	11593
ENSMUSG00000031562	Ensembl Gene Model	MGI:2444529	Dctd	dCMP deaminase	protein coding gene	8	+	48552127	48594702	320685
ENSMUSG00000031565	Ensembl Gene Model	MGI:95522	Fgfr1	fibroblast growth factor receptor 1	protein coding gene	8	+	26008775	26065734	14182
ENSMUSG00000031577	Ensembl Gene Model	MGI:2384576	Tti2	TELO2 interacting protein 2	protein coding gene	8	+	31640344	31654731	234138
ENSMUSG00000031600	Ensembl Gene Model	MGI:1261835	Vps37a	vacuolar protein sorting 37A	protein coding gene	8	+	40964824	41003798	52348
ENSMUSG00000031609	Ensembl Gene Model	MGI:1929129	Sap30	sin3 associated polypeptide	protein coding gene	8	-	57935741	57940894	60406
ENSMUSG00000031618	Ensembl Gene Model	MGI:99459	Nr3c2	nuclear receptor subfamily 3, group C, member 2	protein coding gene	8	+	77626070	77971641	110784
ENSMUSG00000031627	Ensembl Gene Model	MGI:96591	Irf2	interferon regulatory factor 2	protein coding gene	8	+	47192767	47300493	16363
ENSMUSG00000031628	Ensembl Gene Model	MGI:107739	Casp3	caspase 3	protein coding gene	8	+	47070326	47092724	12367
ENSMUSG00000031654	Ensembl Gene Model	MGI:88281	Cbln1	cerebellin 1 precursor protein	protein coding gene	8	-	88195481	88199220	12404
ENSMUSG00000031659	Ensembl Gene Model	MGI:102891	Adcy7	adenylate cyclase 7	protein coding gene	8	+	88999031	89056590	11513
ENSMUSG00000031661	Ensembl Gene Model	MGI:2135954	Nkd1	naked cuticle 1	protein coding gene	8	+	89247982	89321512	93960
ENSMUSG00000031697	Ensembl Gene Model	MGI:1929285	Orc6	origin recognition complex, subunit 6	protein coding gene	8	+	86026261	86034907	56452
ENSMUSG00000031701	Ensembl Gene Model	MGI:1931882	Dnaja2	DnaJ heat shock protein family (Hsp40) member A2	protein coding gene	8	-	86264262	86281973	56445
ENSMUSG00000031730	Ensembl Gene Model	MGI:1928378	Dhodh	dihydroorotate dehydrogenase	protein coding gene	8	-	110319876	110335330	56749
ENSMUSG00000031751	Ensembl Gene Model	MGI:1345634	Amfr	autocrine motility factor receptor	protein coding gene	8	-	94698216	94739268	23802
ENSMUSG00000031770	Ensembl Gene Model	MGI:1927406	Herpud1	homocysteine-inducible, endoplasmic reticulum stress-inducible, ubiquitin-like domain member 1	protein coding gene	8	+	95113066	95122005	64209
ENSMUSG00000031785	Ensembl Gene Model	MGI:1340051	Adgrg1	adhesion G protein-coupled receptor G1	protein coding gene	8	+	95701384	95740836	14766
ENSMUSG00000031790	Ensembl Gene Model	MGI:109320	Mmp15	matrix metallopeptidase 15	protein coding gene	8	+	96078924	96100921	17388
ENSMUSG00000031791	Ensembl Gene Model	MGI:1921416	Tmem38a	transmembrane protein 38A	protein coding gene	8	+	73325899	73341126	74166
ENSMUSG00000031808	Ensembl Gene Model	MGI:1347098	Slc27a1	solute carrier family 27 (fatty acid transporter), member 1	protein coding gene	8	+	72021526	72039946	26457
ENSMUSG00000031837	Ensembl Gene Model	MGI:2152211	Necab2	N-terminal EF-hand calcium binding protein 2	protein coding gene	8	+	120173458	120199379	117148
ENSMUSG00000031841	Ensembl Gene Model	MGI:99551	Cdh13	cadherin 13	protein coding gene	8	+	119010472	120051660	12554
ENSMUSG00000031851	Ensembl Gene Model	MGI:1913816	Ntpcr	nucleoside-triphosphatase, cancer-related	protein coding gene	8	+	126456724	126474974	66566
ENSMUSG00000031875	Ensembl Gene Model	MGI:2447162	Cmtm3	CKLF-like MARVEL transmembrane domain containing 3	protein coding gene	8	+	105066042	105074304	68119
ENSMUSG00000031897	Ensembl Gene Model	MGI:1096380	Psmb10	proteasome (prosome, macropain) subunit, beta type 10	protein coding gene	8	-	106662360	106665024	19171
ENSMUSG00000031901	Ensembl Gene Model	MGI:1913619	Dus2	dihydrouridine synthase 2	protein coding gene	8	+	106738110	106780472	66369
ENSMUSG00000031903	Ensembl Gene Model	MGI:2178076	Pla2g15	phospholipase A2, group XV	protein coding gene	8	+	106877031	106891347	192654
ENSMUSG00000031910	Ensembl Gene Model	MGI:109599	Has3	hyaluronan synthase 3	protein coding gene	8	+	107596874	107609534	15118
ENSMUSG00000031918	Ensembl Gene Model	MGI:1924366	Mtmr2	myotubularin related protein 2	protein coding gene	9	+	13659706	13717777	77116
ENSMUSG00000031948	Ensembl Gene Model	MGI:1934754	Kars	lysyl-tRNA synthetase	protein coding gene	8	-	112720075	112737955	85305
ENSMUSG00000031951	Ensembl Gene Model	MGI:2685024	Tmem231	transmembrane protein 231	protein coding gene	8	-	112638639	112660445	234740
ENSMUSG00000031960	Ensembl Gene Model	MGI:2384560	Aars	alanyl-tRNA synthetase	protein coding gene	8	+	111759781	111784237	234734
ENSMUSG00000031988	Ensembl Gene Model	MGI:1917656	Vps26b	VPS26 retromer complex component B	protein coding gene	9	-	26919067	26941361	69091
ENSMUSG00000032012	Ensembl Gene Model	MGI:1926483	Nectin1	nectin cell adhesion molecule 1	protein coding gene	9	+	43655251	43718758	58235
ENSMUSG00000032017	Ensembl Gene Model	MGI:95817	Grik4	glutamate receptor, ionotropic, kainate 4	protein coding gene	9	-	42431708	42856296	110637
ENSMUSG00000032020	Ensembl Gene Model	MGI:1920078	Ubash3b	ubiquitin associated and SH3 domain containing, B	protein coding gene	9	-	40922056	41069358	72828
ENSMUSG00000032024	Ensembl Gene Model	MGI:1918816	Clmp	CXADR-like membrane protein	protein coding gene	9	+	40597258	40696615	71566
ENSMUSG00000032036	Ensembl Gene Model	MGI:1914953	Kirrel3	kirre like nephrin family adhesion molecule 3	protein coding gene	9	+	34397190	34948012	67703
ENSMUSG00000032038	Ensembl Gene Model	MGI:1316743	St3gal4	ST3 beta-galactoside alpha-2,3-sialyltransferase 4	protein coding gene	9	-	34957872	35028160	20443
ENSMUSG00000032059	Ensembl Gene Model	MGI:1924753	Alg9	asparagine-linked glycosylation 9 (alpha 1,2 mannosyltransferase)	protein coding gene	9	+	50686525	50754939	102580
ENSMUSG00000032067	Ensembl Gene Model	MGI:1338783	Pts	6-pyruvoyl-tetrahydropterin synthase	protein coding gene	9	-	50432917	50440017	19286
ENSMUSG00000032086	Ensembl Gene Model	MGI:1346542	Bace1	beta-site APP cleaving enzyme 1	protein coding gene	9	+	45749843	45774791	23821
ENSMUSG00000032087	Ensembl Gene Model	MGI:2150309	Dscaml1	DS cell adhesion molecule like 1	protein coding gene	9	+	45338735	45665011	114873
ENSMUSG00000032101	Ensembl Gene Model	MGI:1353582	Ddx25	DEAD box helicase 25	protein coding gene	9	-	35453144	35469766	30959
ENSMUSG00000032120	Ensembl Gene Model	MGI:1919014	C2cd2l	C2 calcium-dependent domain containing 2-like	protein coding gene	9	-	44220534	44231579	71764
ENSMUSG00000032123	Ensembl Gene Model	MGI:1196396	Dpagt1	dolichyl-phosphate (UDP-N-acetylglucosamine) acetylglucosaminephosphotransferase 1 (GlcNAc-1-P transferase)	protein coding gene	9	+	44237316	44245197	13478
ENSMUSG00000032128	Ensembl Gene Model	MGI:1343102	Robo3	roundabout guidance receptor 3	protein coding gene	9	-	37327341	37344730	19649
ENSMUSG00000032131	Ensembl Gene Model	MGI:1890594	Abcg4	ATP binding cassette subfamily G member 4	protein coding gene	9	-	44184485	44199912	192663
ENSMUSG00000032177	Ensembl Gene Model	MGI:99558	Pde4a	phosphodiesterase 4A, cAMP specific	protein coding gene	9	+	21077010	21124544	18577
ENSMUSG00000032232	Ensembl Gene Model	MGI:1915428	Cgnl1	cingulin-like 1	protein coding gene	9	-	71533791	71678884	68178
ENSMUSG00000032245	Ensembl Gene Model	MGI:2159324	Cln6	ceroid-lipofuscinosis, neuronal 6	protein coding gene	9	+	62746067	62759288	76524
ENSMUSG00000032249	Ensembl Gene Model	MGI:108447	Anp32a	acidic (leucine-rich) nuclear phosphoprotein 32 family, member A	protein coding gene	9	+	62248625	62286086	11737
ENSMUSG00000032252	Ensembl Gene Model	MGI:2136405	Glce	glucuronyl C5-epimerase	protein coding gene	9	-	61964526	62029891	93683
ENSMUSG00000032259	Ensembl Gene Model	MGI:94924	Drd2	dopamine receptor D2	protein coding gene	9	+	49251927	49319477	13489
ENSMUSG00000032262	Ensembl Gene Model	MGI:1933331	Elovl4	elongation of very long chain fatty acids (FEN1/Elo2, SUR4/Elo3, yeast)-like 4	protein coding gene	9	-	83660745	83688330	83603
ENSMUSG00000032263	Ensembl Gene Model	MGI:88137	Bckdhb	branched chain ketoacid dehydrogenase E1, beta polypeptide	protein coding gene	9	+	83807198	84006293	12040
ENSMUSG00000032269	Ensembl Gene Model	MGI:96282	Htr3a	5-hydroxytryptamine (serotonin) receptor 3A	protein coding gene	9	-	48810513	48822399	15561
ENSMUSG00000032281	Ensembl Gene Model	MGI:2385656	Acsbg1	acyl-CoA synthetase bubblegum family member 1	protein coding gene	9	-	54512161	54569154	94180
ENSMUSG00000032285	Ensembl Gene Model	MGI:1927638	Dnaja4	DnaJ heat shock protein family (Hsp40) member A4	protein coding gene	9	+	54606157	54623599	58233
ENSMUSG00000032291	Ensembl Gene Model	MGI:88490	Crabp1	cellular retinoic acid binding protein I	protein coding gene	9	+	54672032	54680394	12903
ENSMUSG00000032305	Ensembl Gene Model	MGI:1925573	Fam219b	family with sequence similarity 219, member B	protein coding gene	9	+	57444811	57450467	78323
ENSMUSG00000032307	Ensembl Gene Model	MGI:2388672	Ube2q2	ubiquitin-conjugating enzyme E2Q family member 2	protein coding gene	9	+	55056602	55114813	109161
ENSMUSG00000032313	Ensembl Gene Model	MGI:2142980	Tmem266	transmembrane protein 266	protein coding gene	9	+	55234197	55345629	244886
ENSMUSG00000032323	Ensembl Gene Model	MGI:88582	Cyp11a1	cytochrome P450, family 11, subfamily a, polypeptide 1	protein coding gene	9	+	57913694	57934306	13070
ENSMUSG00000032333	Ensembl Gene Model	MGI:1916356	Stoml1	stomatin-like 1	protein coding gene	9	+	58160447	58169803	69106
ENSMUSG00000032349	Ensembl Gene Model	MGI:1916051	Elovl5	ELOVL family member 5, elongation of long chain fatty acids (yeast)	protein coding gene	9	+	77824647	77891801	68801
ENSMUSG00000032356	Ensembl Gene Model	MGI:99694	Rasgrf1	RAS protein-specific guanine nucleotide-releasing factor 1	protein coding gene	9	+	89791961	89909030	19417
ENSMUSG00000032402	Ensembl Gene Model	MGI:1201674	Smad3	SMAD family member 3	protein coding gene	9	-	63554049	63665276	17127
ENSMUSG00000032449	Ensembl Gene Model	MGI:1924909	Slc25a36	solute carrier family 25, member 36	protein coding gene	9	-	96957014	96993094	192287
ENSMUSG00000032456	Ensembl Gene Model	MGI:1921330	Nmnat3	nicotinamide nucleotide adenylyltransferase 3	protein coding gene	9	+	98169488	98302491	74080
ENSMUSG00000032470	Ensembl Gene Model	MGI:1100856	Mras	muscle and microspikes RAS	protein coding gene	9	-	99267473	99319434	17532
ENSMUSG00000032482	Ensembl Gene Model	MGI:1352747	Cspg5	chondroitin sulfate proteoglycan 5	protein coding gene	9	+	110072851	110091644	29873
ENSMUSG00000032500	Ensembl Gene Model	MGI:3039580	Dclk3	doublecortin-like kinase 3	protein coding gene	9	+	111268149	111318186	245038
ENSMUSG00000032511	Ensembl Gene Model	MGI:98251	Scn5a	sodium channel, voltage-gated, type V, alpha	protein coding gene	9	-	119312474	119408082	20271
ENSMUSG00000032532	Ensembl Gene Model	MGI:88297	Cck	cholecystokinin	protein coding gene	9	-	121318890	121324760	12424
ENSMUSG00000032549	Ensembl Gene Model	MGI:107283	Rab6b	RAB6B, member RAS oncogene family	protein coding gene	9	+	102988986	103062475	270192
ENSMUSG00000032553	Ensembl Gene Model	MGI:102964	Srprb	signal recognition particle receptor, B subunit	protein coding gene	9	-	103065232	103079264	20818
ENSMUSG00000032577	Ensembl Gene Model	MGI:2143163	Mapkapk3	mitogen-activated protein kinase-activated protein kinase 3	protein coding gene	9	-	107132126	107167076	102626
ENSMUSG00000032615	Ensembl Gene Model	MGI:1917127	Nt5m	5',3'-nucleotidase, mitochondrial	protein coding gene	11	+	59738692	59767359	103850
ENSMUSG00000032680	Ensembl Gene Model	MGI:3045333	6820408C15Rik	RIKEN cDNA 6820408C15 gene	protein coding gene	2	+	152257507	152286250	228778
ENSMUSG00000032698	Ensembl Gene Model	MGI:102811	Lmo2	LIM domain only 2	protein coding gene	2	+	103788340	103812223	16909
ENSMUSG00000032715	Ensembl Gene Model	MGI:1345675	Trib3	tribbles pseudokinase 3	protein coding gene	2	-	152179342	152185952	228775
ENSMUSG00000032735	Ensembl Gene Model	MGI:2442582	Ablim3	actin binding LIM protein family, member 3	protein coding gene	18	-	61932463	62044895	319713
ENSMUSG00000032737	Ensembl Gene Model	MGI:1333787	Inppl1	inositol polyphosphate phosphatase-like 1	protein coding gene	7	-	101471839	101487433	16332
ENSMUSG00000032741	Ensembl Gene Model	MGI:2182472	Tpcn1	two pore channel 1	protein coding gene	5	-	120672222	120726731	252972
ENSMUSG00000032773	Ensembl Gene Model	MGI:88396	Chrm1	cholinergic receptor, muscarinic 1, CNS	protein coding gene	19	+	8641369	8660970	12669
ENSMUSG00000032788	Ensembl Gene Model	MGI:1351869	Pdxk	pyridoxal (pyridoxine, vitamin B6) kinase	protein coding gene	10	-	78272581	78300782	216134
ENSMUSG00000032796	Ensembl Gene Model	MGI:99892	Lama1	laminin, alpha 1	protein coding gene	17	+	68004254	68129642	16772
ENSMUSG00000032803	Ensembl Gene Model	MGI:2448759	Cdv3	carnitine deficiency-associated gene expressed in ventricle 3	protein coding gene	9	-	103230301	103243034	321022
ENSMUSG00000032816	Ensembl Gene Model	MGI:1858497	Igdcc4	immunoglobulin superfamily, DCC subclass, member 4	protein coding gene	9	+	65008768	65045222	56741
ENSMUSG00000032867	Ensembl Gene Model	MGI:1923041	Fbxw8	F-box and WD-40 domain protein 8	protein coding gene	5	-	118203046	118293523	231672
ENSMUSG00000032890	Ensembl Gene Model	MGI:2443331	Rims3	regulating synaptic membrane exocytosis 3	protein coding gene	4	+	120712013	120753776	242662
ENSMUSG00000032902	Ensembl Gene Model	MGI:106013	Slc16a1	solute carrier family 16 (monocarboxylic acid transporters), member 1	protein coding gene	3	+	104545984	104565778	20501
ENSMUSG00000032936	Ensembl Gene Model	MGI:2384296	Camkv	CaM kinase-like vesicle-associated	protein coding gene	9	+	107812878	107826890	235604
ENSMUSG00000032940	Ensembl Gene Model	MGI:2447622	Rbm11	RNA binding motif protein 11	protein coding gene	16	+	75389732	75399713	224344
ENSMUSG00000032946	Ensembl Gene Model	MGI:1333849	Rasgrp2	RAS, guanyl releasing protein 2	protein coding gene	19	+	6449370	6465246	19395
ENSMUSG00000032997	Ensembl Gene Model	MGI:106576	Chpf	chondroitin polymerizing factor	protein coding gene	1	-	75451213	75455951	74241
ENSMUSG00000033007	Ensembl Gene Model	MGI:2652846	Asic4	acid-sensing (proton-gated) ion channel family member 4	protein coding gene	1	+	75427080	75450987	241118
ENSMUSG00000033039	Ensembl Gene Model	MGI:105870	Micall1	microtubule associated monooxygenase, calponin and LIM domain containing -like 1	protein coding gene	15	+	78993098	79021100	27008
ENSMUSG00000033059	Ensembl Gene Model	MGI:97828	Pygb	brain glycogen phosphorylase	protein coding gene	2	+	150628716	150673668	110078
ENSMUSG00000033065	Ensembl Gene Model	MGI:97548	Pfkm	phosphofructokinase, muscle	protein coding gene	15	+	97990470	98030328	18642
ENSMUSG00000033066	Ensembl Gene Model	MGI:1202388	Gas7	growth arrest specific 7	protein coding gene	11	+	67345917	67575800	14457
ENSMUSG00000033174	Ensembl Gene Model	MGI:1346042	Mgll	monoglyceride lipase	protein coding gene	6	+	88701394	88805342	23945
ENSMUSG00000033233	Ensembl Gene Model	MGI:1918187	Trim45	tripartite motif-containing 45	protein coding gene	3	+	100829518	100844236	229644
ENSMUSG00000033256	Ensembl Gene Model	MGI:3613669	Shf	Src homology 2 domain containing F	protein coding gene	2	-	122179373	122199643	435684
ENSMUSG00000033278	Ensembl Gene Model	MGI:102694	Ptprm	protein tyrosine phosphatase, receptor type, M	protein coding gene	17	-	66973942	67661452	19274
ENSMUSG00000033295	Ensembl Gene Model	MGI:102695	Ptprf	protein tyrosine phosphatase, receptor type, F	protein coding gene	4	-	118065410	118148602	19268
ENSMUSG00000033307	Ensembl Gene Model	MGI:96982	Mif	macrophage migration inhibitory factor (glycosylation-inhibiting factor)	protein coding gene	10	-	75695187	75696074	17319
ENSMUSG00000033335	Ensembl Gene Model	MGI:109547	Dnm2	dynamin 2	protein coding gene	9	+	21336204	21419055	13430
ENSMUSG00000033423	Ensembl Gene Model	MGI:2153887	Eri3	exoribonuclease 3	protein coding gene	4	+	117407562	117531494	140546
ENSMUSG00000033453	Ensembl Gene Model	MGI:2449569	Adamts15	a disintegrin-like and metallopeptidase (reprolysin type) with thrombospondin type 1 motif, 15	protein coding gene	9	-	30810451	30833748	235130
ENSMUSG00000033530	Ensembl Gene Model	MGI:2144724	Ttc7b	tetratricopeptide repeat domain 7B	protein coding gene	12	-	100267029	100487085	104718
ENSMUSG00000033595	Ensembl Gene Model	MGI:2182619	Lgi3	leucine-rich repeat LGI family, member 3	protein coding gene	14	+	70768125	70775764	213469
ENSMUSG00000033701	Ensembl Gene Model	MGI:1919732	Acbd6	acyl-Coenzyme A binding domain containing 6	protein coding gene	1	+	155433845	155564120	72482
ENSMUSG00000033706	Ensembl Gene Model	MGI:108048	Smyd5	SET and MYND domain containing 5	protein coding gene	6	+	85408971	85423417	232187
ENSMUSG00000033717	Ensembl Gene Model	MGI:87934	Adra2a	adrenergic receptor, alpha 2a	protein coding gene	19	+	54033690	54037413	11551
ENSMUSG00000033720	Ensembl Gene Model	MGI:2137681	Sfxn5	sideroflexin 5	protein coding gene	6	-	85190031	85310404	94282
ENSMUSG00000033726	Ensembl Gene Model	MGI:95387	Emx1	empty spiracles homeobox 1	protein coding gene	6	+	85164913	85181445	13796
ENSMUSG00000033763	Ensembl Gene Model	MGI:3039591	Mtss2	MTSS I-BAR domain containing 2	protein coding gene	8	+	111448108	111468032	244654
ENSMUSG00000033809	Ensembl Gene Model	MGI:1098592	Alg3	asparagine-linked glycosylation 3 (alpha-1,3-mannosyltransferase)	protein coding gene	16	-	20424208	20429515	208624
ENSMUSG00000033813	Ensembl Gene Model	MGI:1196624	Tcea1	transcription elongation factor A (SII) 1	protein coding gene	1	+	4928037	4968132	21399
ENSMUSG00000033906	Ensembl Gene Model	MGI:1915336	Zdhhc15	zinc finger, DHHC domain containing 15	protein coding gene	X	-	103580575	103714670	108672
ENSMUSG00000034009	Ensembl Gene Model	MGI:2682211	Rxfp1	relaxin/insulin-like family peptide receptor 1	protein coding gene	3	-	79548918	79645187	381489
ENSMUSG00000034037	Ensembl Gene Model	MGI:2443369	Fgd5	FYVE, RhoGEF and PH domain containing 5	protein coding gene	6	+	91955859	92052985	232237
ENSMUSG00000034064	Ensembl Gene Model	MGI:2444232	Poglut1	protein O-glucosyltransferase 1	protein coding gene	16	-	38345499	38370620	224143
ENSMUSG00000034088	Ensembl Gene Model	MGI:99256	Hdlbp	high density lipoprotein (HDL) binding protein	protein coding gene	1	-	93333662	93406537	110611
ENSMUSG00000034164	Ensembl Gene Model	MGI:2155091	Emid1	EMI domain containing 1	protein coding gene	11	-	5056265	5102257	140703
ENSMUSG00000034220	Ensembl Gene Model	MGI:1194891	Gpc1	glypican 1	protein coding gene	1	+	92759367	92787933	14733
ENSMUSG00000034245	Ensembl Gene Model	MGI:2385252	Hdac11	histone deacetylase 11	protein coding gene	6	+	91133652	91151674	232232
ENSMUSG00000034254	Ensembl Gene Model	MGI:1932075	Agpat1	1-acylglycerol-3-phosphate O-acyltransferase 1 (lysophosphatidic acid acyltransferase, alpha)	protein coding gene	17	+	34823236	34832423	55979
ENSMUSG00000034324	Ensembl Gene Model	MGI:2443061	Tmem132c	transmembrane protein 132C	protein coding gene	5	+	127318890	127642854	208213
ENSMUSG00000034343	Ensembl Gene Model	MGI:1915171	Ube2f	ubiquitin-conjugating enzyme E2F (putative)	protein coding gene	1	+	91177412	91214243	67921
ENSMUSG00000034401	Ensembl Gene Model	MGI:1915196	Spata6	spermatogenesis associated 6	protein coding gene	4	+	111577151	111686339	67946
ENSMUSG00000034413	Ensembl Gene Model	MGI:3643092	Neurl1b	neuralized E3 ubiquitin protein ligase 1B	protein coding gene	17	+	26633833	26665295	240055
ENSMUSG00000034449	Ensembl Gene Model	MGI:2652816	Dhrs11	dehydrogenase/reductase (SDR family) member 11	protein coding gene	11	-	84711682	84719820	192970
ENSMUSG00000034471	Ensembl Gene Model	MGI:2157062	Caskin2	CASK-interacting protein 2	protein coding gene	11	-	115690009	115704465	140721
ENSMUSG00000034522	Ensembl Gene Model	MGI:2682318	Zfp395	zinc finger protein 395	protein coding gene	14	+	65595838	65636379	380912
ENSMUSG00000034570	Ensembl Gene Model	MGI:2158663	Inpp5j	inositol polyphosphate 5-phosphatase J	protein coding gene	11	-	3444375	3454821	170835
ENSMUSG00000034620	Ensembl Gene Model	MGI:2384919	Rxylt1	ribitol xylosyltransferase 1	protein coding gene	10	-	121916844	121933271	216395
ENSMUSG00000034659	Ensembl Gene Model	MGI:1915789	Tmem109	transmembrane protein 109	protein coding gene	19	-	10848021	10859107	68539
ENSMUSG00000034667	Ensembl Gene Model	MGI:1920442	Xpot	exportin, tRNA (nuclear export receptor for tRNAs)	protein coding gene	10	-	121423285	121462237	73192
ENSMUSG00000034706	Ensembl Gene Model	MGI:2685574	Dnai2	dynein axonemal intermediate chain 2	protein coding gene	11	+	114618234	114648715	432611
ENSMUSG00000034730	Ensembl Gene Model	MGI:1933736	Adgrb1	adhesion G protein-coupled receptor B1	protein coding gene	15	+	74388045	74461314	107831
ENSMUSG00000034744	Ensembl Gene Model	MGI:1860418	Nagk	N-acetylglucosamine kinase	protein coding gene	6	+	83770810	83779538	56174
ENSMUSG00000034793	Ensembl Gene Model	MGI:1915651	G6pc3	glucose 6 phosphatase, catalytic, 3	protein coding gene	11	+	102080525	102084907	68401
ENSMUSG00000034813	Ensembl Gene Model	MGI:1921303	Grip1	glutamate receptor interacting protein 1	protein coding gene	10	+	119289810	119923172	74053
ENSMUSG00000034853	Ensembl Gene Model	MGI:1913736	Acot11	acyl-CoA thioesterase 11	protein coding gene	4	-	106601752	106662195	329910
ENSMUSG00000034854	Ensembl Gene Model	MGI:3604804	Mfsd12	major facilitator superfamily domain containing 12	protein coding gene	10	+	81193325	81202059	73822
ENSMUSG00000034867	Ensembl Gene Model	MGI:2444103	Ankrd27	ankyrin repeat domain 27 (VPS9 domain)	protein coding gene	7	+	35285669	35338651	245886
ENSMUSG00000034902	Ensembl Gene Model	MGI:1298224	Pip5k1c	phosphatidylinositol-4-phosphate 5-kinase, type 1 gamma	protein coding gene	10	+	81128797	81155807	18717
ENSMUSG00000034936	Ensembl Gene Model	MGI:1933155	Arl4d	ADP-ribosylation factor-like 4D	protein coding gene	11	+	101556367	101558658	80981
ENSMUSG00000034949	Ensembl Gene Model	MGI:2143792	Zfr2	zinc finger RNA binding protein 2	protein coding gene	10	+	81068989	81087957	103406
ENSMUSG00000034957	Ensembl Gene Model	MGI:99480	Cebpa	CCAAT/enhancer binding protein (C/EBP), alpha	protein coding gene	7	+	34818718	34821353	12606
ENSMUSG00000034987	Ensembl Gene Model	MGI:108482	Hrh2	histamine receptor H2	protein coding gene	13	+	54346148	54390199	15466
ENSMUSG00000035049	Ensembl Gene Model	MGI:2147437	Rrp12	ribosomal RNA processing 12 homolog	protein coding gene	19	-	41851290	41884612	107094
ENSMUSG00000035095	Ensembl Gene Model	MGI:3606565	Fam167a	family with sequence similarity 167, member A	protein coding gene	14	+	63673843	63702947	219148
ENSMUSG00000035104	Ensembl Gene Model	MGI:2385247	Eva1a	eva-1 homolog A (C. elegans)	protein coding gene	6	+	82018029	82070080	232146
ENSMUSG00000035105	Ensembl Gene Model	MGI:1932288	Egln3	egl-9 family hypoxia-inducible factor 3	protein coding gene	12	-	54225767	54250646	112407
ENSMUSG00000035198	Ensembl Gene Model	MGI:101834	Tubg1	tubulin, gamma 1	protein coding gene	11	+	101010764	101017245	103733
ENSMUSG00000035202	Ensembl Gene Model	MGI:2142973	Lars2	leucyl-tRNA synthetase, mitochondrial	protein coding gene	9	+	123195992	123291731	102436
ENSMUSG00000035277	Ensembl Gene Model	MGI:1097716	Arx	aristaless related homeobox	protein coding gene	X	+	92330113	92341963	11878
ENSMUSG00000035278	Ensembl Gene Model	MGI:1925920	Plekhj1	pleckstrin homology domain containing, family J member 1	protein coding gene	10	-	80631933	80634460	78670
ENSMUSG00000035283	Ensembl Gene Model	MGI:87937	Adrb1	adrenergic receptor, beta 1	protein coding gene	19	+	56710549	56713582	11554
ENSMUSG00000035311	Ensembl Gene Model	MGI:3643902	Gnptab	N-acetylglucosamine-1-phosphate transferase, alpha and beta subunits	protein coding gene	10	+	88214996	88283186	432486
ENSMUSG00000035325	Ensembl Gene Model	MGI:1916412	Sec31a	Sec31 homolog A (S. cerevisiae)	protein coding gene	5	-	100509508	100564093	69162
ENSMUSG00000035357	Ensembl Gene Model	MGI:1933157	Pdzrn3	PDZ domain containing RING finger 3	protein coding gene	6	-	101126570	101354858	55983
ENSMUSG00000035372	Ensembl Gene Model	MGI:1919306	1810055G02Rik	RIKEN cDNA 1810055G02 gene	protein coding gene	19	+	3758293	3767881	72056
ENSMUSG00000035397	Ensembl Gene Model	MGI:2153049	Klf16	Kruppel-like factor 16	protein coding gene	10	-	80402955	80413130	118445
ENSMUSG00000035443	Ensembl Gene Model	MGI:1925112	Thyn1	thymocyte nuclear protein 1	protein coding gene	9	+	26911006	26918632	77862
ENSMUSG00000035476	Ensembl Gene Model	MGI:1913974	Tab3	TGF-beta activated kinase 1/MAP3K7 binding protein 3	protein coding gene	X	+	84617628	84678075	66724
ENSMUSG00000035504	Ensembl Gene Model	MGI:1917585	Reep6	receptor accessory protein 6	protein coding gene	10	+	80165831	80172275	70335
ENSMUSG00000035547	Ensembl Gene Model	MGI:1100859	Capn5	calpain 5	protein coding gene	7	-	97770766	97827481	12337
ENSMUSG00000035551	Ensembl Gene Model	MGI:1933198	Igfbpl1	insulin-like growth factor binding protein-like 1	protein coding gene	4	-	45809507	45826827	75426
ENSMUSG00000035596	Ensembl Gene Model	MGI:1924832	Mboat7	membrane bound O-acyltransferase domain containing 7	protein coding gene	7	-	3680788	3696188	77582
ENSMUSG00000035678	Ensembl Gene Model	MGI:1101058	Tnfsf9	tumor necrosis factor (ligand) superfamily, member 9	protein coding gene	17	+	57412325	57414757	21950
ENSMUSG00000035681	Ensembl Gene Model	MGI:96668	Kcnc2	potassium voltage gated channel, Shaw-related subfamily, member 2	protein coding gene	10	+	112107026	112302929	268345
ENSMUSG00000035686	Ensembl Gene Model	MGI:109126	Thrsp	thyroid hormone responsive	protein coding gene	7	-	97062140	97066757	21835
ENSMUSG00000035776	Ensembl Gene Model	MGI:2177151	Cd99l2	CD99 antigen-like 2	protein coding gene	X	-	70463666	70536455	171486
ENSMUSG00000035781	Ensembl Gene Model	MGI:1924814	R3hdm4	R3H domain containing 4	protein coding gene	10	-	79745886	79752764	109284
ENSMUSG00000035835	Ensembl Gene Model	MGI:2388640	Plppr3	phospholipid phosphatase related 3	protein coding gene	10	-	79696309	79710468	216152
ENSMUSG00000035864	Ensembl Gene Model	MGI:99667	Syt1	synaptotagmin I	protein coding gene	10	-	108333511	108846843	20979
ENSMUSG00000035877	Ensembl Gene Model	MGI:2444772	Zhx3	zinc fingers and homeoboxes 3	protein coding gene	2	-	160612367	160714910	320799
ENSMUSG00000035934	Ensembl Gene Model	MGI:2445415	Pknox2	Pbx/knotted 1 homeobox 2	protein coding gene	9	-	36802275	37058638	208076
ENSMUSG00000035958	Ensembl Gene Model	MGI:1860486	Tdp2	tyrosyl-DNA phosphodiesterase 2	protein coding gene	13	+	25015662	25026136	56196
ENSMUSG00000035964	Ensembl Gene Model	MGI:1915187	Tmem59l	transmembrane protein 59-like	protein coding gene	8	-	70936517	70940008	67937
ENSMUSG00000036062	Ensembl Gene Model	MGI:2140712	Phf24	PHD finger protein 24	protein coding gene	4	+	42916660	42944752	230085
ENSMUSG00000036067	Ensembl Gene Model	MGI:2443286	Slc2a6	solute carrier family 2 (facilitated glucose transporter), member 6	protein coding gene	2	-	26911375	26918010	227659
ENSMUSG00000036106	Ensembl Gene Model	MGI:1924714	Prr5	proline rich 5 (renal)	protein coding gene	15	+	84553821	84587874	109270
ENSMUSG00000036111	Ensembl Gene Model	MGI:102812	Lmo1	LIM domain only 1	protein coding gene	7	-	108737779	108774414	109594
ENSMUSG00000036206	Ensembl Gene Model	MGI:2138297	Sh3bp4	SH3-domain binding protein 4	protein coding gene	1	+	88998137	89082790	98402
ENSMUSG00000036323	Ensembl Gene Model	MGI:1333795	Srp72	signal recognition particle 72	protein coding gene	5	+	77122548	77147782	66661
ENSMUSG00000036327	Ensembl Gene Model	MGI:2387194	Qsox2	quiescin Q6 sulfhydryl oxidase 2	protein coding gene	2	-	26099136	26127411	227638
ENSMUSG00000036356	Ensembl Gene Model	MGI:2442354	Csgalnact1	chondroitin sulfate N-acetylgalactosaminyltransferase 1	protein coding gene	8	-	68809433	69187798	234356
ENSMUSG00000036432	Ensembl Gene Model	MGI:108062	Siah2	siah E3 ubiquitin protein ligase 2	protein coding gene	3	-	58582359	58599821	20439
ENSMUSG00000036466	Ensembl Gene Model	MGI:1920951	Megf11	multiple EGF-like-domains 11	protein coding gene	9	+	64292908	64616487	214058
ENSMUSG00000036528	Ensembl Gene Model	MGI:894649	Ppfibp2	PTPRF interacting protein, binding protein 2 (liprin beta 2)	protein coding gene	7	+	107194414	107347790	19024
ENSMUSG00000036545	Ensembl Gene Model	MGI:1347356	Adamts2	a disintegrin-like and metallopeptidase (reprolysin type) with thrombospondin type 1 motif, 2	protein coding gene	11	+	50492912	50698400	216725
ENSMUSG00000036585	Ensembl Gene Model	MGI:95515	Fgf1	fibroblast growth factor 1	protein coding gene	18	-	38971726	39062525	14164
ENSMUSG00000036606	Ensembl Gene Model	MGI:2154239	Plxnb2	plexin B2	protein coding gene	15	-	89039752	89064991	140570
ENSMUSG00000036712	Ensembl Gene Model	MGI:1921506	Cyld	CYLD lysine 63 deubiquitinase	protein coding gene	8	+	89423656	89478573	74256
ENSMUSG00000036775	Ensembl Gene Model	MGI:1347059	Decr2	2-4-dienoyl-Coenzyme A reductase 2, peroxisomal	protein coding gene	17	-	26300182	26309296	26378
ENSMUSG00000036820	Ensembl Gene Model	MGI:2443978	Amdhd2	amidohydrolase domain containing 2	protein coding gene	17	-	24374807	24382740	245847
ENSMUSG00000036860	Ensembl Gene Model	MGI:1914462	Mrpl55	mitochondrial ribosomal protein L55	protein coding gene	11	+	59093312	59096960	67212
ENSMUSG00000036880	Ensembl Gene Model	MGI:1098623	Acaa2	acetyl-Coenzyme A acyltransferase 2 (mitochondrial 3-oxoacyl-Coenzyme A thiolase)	protein coding gene	18	+	74912283	74939278	52538
ENSMUSG00000036893	Ensembl Gene Model	MGI:1924933	Ehmt1	euchromatic histone methyltransferase 1	protein coding gene	2	-	24680781	24809658	77683
ENSMUSG00000036913	Ensembl Gene Model	MGI:3045323	Trim67	tripartite motif-containing 67	protein coding gene	8	+	125519831	125561452	330863
ENSMUSG00000036948	Ensembl Gene Model	MGI:2385896	Trappc14	trafficking protein particle complex 14	protein coding gene	5	-	138257918	138262295	231807
ENSMUSG00000036975	Ensembl Gene Model	MGI:1913593	Tmem177	transmembrane protein 177	protein coding gene	1	-	119835620	119840913	66343
ENSMUSG00000036980	Ensembl Gene Model	MGI:109129	Taf6	TATA-box binding protein associated factor 6	protein coding gene	5	-	138176879	138185713	21343
ENSMUSG00000036992	Ensembl Gene Model	MGI:1929619	Nxt1	NTF2-related export protein 1	protein coding gene	2	+	148514535	148517946	56488
ENSMUSG00000037031	Ensembl Gene Model	MGI:1917673	Tspan15	tetraspanin 15	protein coding gene	10	-	62021175	62067030	70423
ENSMUSG00000037103	Ensembl Gene Model	MGI:2684420	Dcaf15	DDB1 and CUL4 associated factor 15	protein coding gene	8	-	84823701	84831397	212123
ENSMUSG00000037111	Ensembl Gene Model	MGI:1920501	Setd7	SET domain containing (lysine methyltransferase) 7	protein coding gene	3	-	51422740	51468300	73251
ENSMUSG00000037126	Ensembl Gene Model	MGI:1920978	Psd	pleckstrin and Sec7 domain containing	protein coding gene	19	-	46300526	46315595	73728
ENSMUSG00000037151	Ensembl Gene Model	MGI:2387182	Lrrc20	leucine rich repeat containing 20	protein coding gene	10	+	61311580	61418570	216011
ENSMUSG00000037171	Ensembl Gene Model	MGI:97359	Nodal	nodal	protein coding gene	10	+	61253751	61261117	18119
ENSMUSG00000037242	Ensembl Gene Model	MGI:1352754	Clic4	chloride intracellular channel 4 (mitochondrial)	protein coding gene	4	-	134941280	135000071	29876
ENSMUSG00000037278	Ensembl Gene Model	MGI:1916321	Tmem97	transmembrane protein 97	protein coding gene	11	-	78432643	78441561	69071
ENSMUSG00000037306	Ensembl Gene Model	MGI:2446214	Man1c1	mannosidase, alpha, class 1C, member 1	protein coding gene	4	-	134289001	134431601	230815
ENSMUSG00000037318	Ensembl Gene Model	MGI:2441706	Traf3ip3	TRAF3 interacting protein 3	protein coding gene	1	-	192857812	192883854	215243
ENSMUSG00000037321	Ensembl Gene Model	MGI:98483	Tap1	transporter 1, ATP-binding cassette, sub-family B (MDR/TAP)	protein coding gene	17	+	34406530	34416199	21354
ENSMUSG00000037348	Ensembl Gene Model	MGI:1919154	Paqr7	progestin and adipoQ receptor family member VII	protein coding gene	4	+	134224072	134237548	71904
ENSMUSG00000037353	Ensembl Gene Model	MGI:1915864	Letmd1	LETM1 domain containing 1	protein coding gene	15	+	100366904	100377045	68614
ENSMUSG00000037362	Ensembl Gene Model	MGI:109185	Ccn3	cellular communication network factor 3	protein coding gene	15	+	54609306	54617158	18133
ENSMUSG00000037366	Ensembl Gene Model	MGI:2140321	Pafah2	platelet-activating factor acetylhydrolase 2	protein coding gene	4	+	134123631	134154723	100163
ENSMUSG00000037432	Ensembl Gene Model	MGI:3616091	Fer1l5	fer-1-like 5 (C. elegans)	protein coding gene	1	+	36411372	36461191	100534273
ENSMUSG00000037509	Ensembl Gene Model	MGI:2442507	Arhgef4	Rho guanine nucleotide exchange factor (GEF) 4	protein coding gene	1	+	34717051	34851835	226970
ENSMUSG00000037553	Ensembl Gene Model	MGI:3527792	Zdhhc18	zinc finger, DHHC domain containing 18	protein coding gene	4	-	133331969	133360801	503610
ENSMUSG00000037579	Ensembl Gene Model	MGI:1341723	Kcnh3	potassium voltage-gated channel, subfamily H (eag-related), member 3	protein coding gene	15	+	99122742	99140698	16512
ENSMUSG00000037664	Ensembl Gene Model	MGI:104564	Cdkn1c	cyclin-dependent kinase inhibitor 1C (P57)	protein coding gene	7	-	143012076	143014787	12577
ENSMUSG00000037697	Ensembl Gene Model	MGI:2150302	Ddhd1	DDHD domain containing 1	protein coding gene	14	-	45830628	45895600	114874
ENSMUSG00000037771	Ensembl Gene Model	MGI:1194488	Slc32a1	solute carrier family 32 (GABA vesicular transporter), member 1	protein coding gene	2	+	158452687	158457668	22348
ENSMUSG00000037788	Ensembl Gene Model	MGI:2141658	Vopp1	vesicular, overexpressed in cancer, prosurvival protein 1	protein coding gene	6	-	57729249	57804968	232023
ENSMUSG00000037818	Ensembl Gene Model	MGI:1915468	Abhd18	abhydrolase domain containing 18	protein coding gene	3	+	40825532	40892573	269423
ENSMUSG00000037824	Ensembl Gene Model	MGI:1196325	Tspan14	tetraspanin 14	protein coding gene	14	-	40628402	40688764	52588
ENSMUSG00000037868	Ensembl Gene Model	MGI:95296	Egr2	early growth response 2	protein coding gene	10	+	67371305	67378018	13654
ENSMUSG00000037872	Ensembl Gene Model	MGI:1097689	Ackr1	atypical chemokine receptor 1 (Duffy blood group)	protein coding gene	1	-	173159453	173161070	13349
ENSMUSG00000037902	Ensembl Gene Model	MGI:108563	Sirpa	signal-regulatory protein alpha	protein coding gene	2	+	129434755	129474148	19261
ENSMUSG00000037949	Ensembl Gene Model	MGI:2143103	Ano10	anoctamin 10	protein coding gene	9	-	122004940	122123489	102566
ENSMUSG00000037992	Ensembl Gene Model	MGI:97856	Rara	retinoic acid receptor, alpha	protein coding gene	11	+	98818644	98865768	19401
ENSMUSG00000038026	Ensembl Gene Model	MGI:108007	Kcnj9	potassium inwardly-rectifying channel, subfamily J, member 9	protein coding gene	1	-	172148075	172156889	16524
ENSMUSG00000038028	Ensembl Gene Model	MGI:2442752	Tigar	Trp53 induced glycolysis regulatory phosphatase	protein coding gene	6	-	127062079	127086520	319801
ENSMUSG00000038034	Ensembl Gene Model	MGI:2154090	Igsf8	immunoglobulin superfamily, member 8	protein coding gene	1	+	172139934	172147410	140559
ENSMUSG00000038074	Ensembl Gene Model	MGI:2387639	Fkbp14	FK506 binding protein 14	protein coding gene	6	-	54554589	54574293	231997
ENSMUSG00000038112	Ensembl Gene Model	MGI:2143322	AW551984	expressed sequence AW551984	protein coding gene	9	-	39498692	39515699	244810
ENSMUSG00000038178	Ensembl Gene Model	MGI:2442746	Slc43a2	solute carrier family 43, member 2	protein coding gene	11	+	75422520	75468401	215113
ENSMUSG00000038233	Ensembl Gene Model	MGI:3041196	Gask1a	golgi associated kinase 1A	protein coding gene	9	+	121780054	121809275	245050
ENSMUSG00000038292	Ensembl Gene Model	MGI:2687329	Kash5	KASH domain containing 5	protein coding gene	7	-	44833048	44854316	384619
ENSMUSG00000038305	Ensembl Gene Model	MGI:1914448	Spats2l	spermatogenesis associated, serine-rich 2-like	protein coding gene	1	+	57813321	57987553	67198
ENSMUSG00000038319	Ensembl Gene Model	MGI:1341722	Kcnh2	potassium voltage-gated channel, subfamily H (eag-related), member 2	protein coding gene	5	-	24524587	24556602	16511
ENSMUSG00000038351	Ensembl Gene Model	MGI:2144695	Sgsm2	small G protein signaling modulator 2	protein coding gene	11	-	74740087	74787886	97761
ENSMUSG00000038375	Ensembl Gene Model	MGI:1915978	Trp53inp2	transformation related protein 53 inducible nuclear protein 2	protein coding gene	2	+	155223574	155231767	68728
ENSMUSG00000038383	Ensembl Gene Model	MGI:3039607	Pigu	phosphatidylinositol glycan anchor biosynthesis, class U	protein coding gene	2	-	155120163	155199344	228812
ENSMUSG00000038388	Ensembl Gene Model	MGI:1927340	Pals2	protein associated with LIN7 2, MAGUK family member	protein coding gene	6	+	50087221	50175919	56524
ENSMUSG00000038393	Ensembl Gene Model	MGI:1889549	Txnip	thioredoxin interacting protein	protein coding gene	3	+	96465273	96469173	56338
ENSMUSG00000038418	Ensembl Gene Model	MGI:95295	Egr1	early growth response 1	protein coding gene	18	+	34994260	34998009	13653
ENSMUSG00000038429	Ensembl Gene Model	MGI:1347343	Usp5	ubiquitin specific peptidase 5 (isopeptidase T)	protein coding gene	6	-	124791982	124806447	22225
ENSMUSG00000038459	Ensembl Gene Model	MGI:1917428	Abhd17c	abhydrolase domain containing 17C	protein coding gene	7	-	83758564	83801101	70178
ENSMUSG00000038486	Ensembl Gene Model	MGI:1927139	Sv2a	synaptic vesicle glycoprotein 2 a	protein coding gene	3	+	96088543	96102499	64051
ENSMUSG00000038539	Ensembl Gene Model	MGI:2141857	Atf5	activating transcription factor 5	protein coding gene	7	-	44461680	44466082	107503
ENSMUSG00000038546	Ensembl Gene Model	MGI:1928741	Ranbp9	RAN binding protein 9	protein coding gene	13	-	43556151	43634758	56705
ENSMUSG00000038550	Ensembl Gene Model	MGI:2684975	Ciart	circadian associated repressor of transcription	protein coding gene	3	-	95785815	95789563	229599
ENSMUSG00000038552	Ensembl Gene Model	MGI:1917195	Fndc4	fibronectin type III domain containing 4	protein coding gene	5	-	31449586	31453279	64339
ENSMUSG00000038615	Ensembl Gene Model	MGI:99421	Nfe2l1	nuclear factor, erythroid derived 2,-like 1	protein coding gene	11	-	96708240	96720794	18023
ENSMUSG00000038633	Ensembl Gene Model	MGI:1097711	Degs1	delta(4)-desaturase, sphingolipid 1	protein coding gene	1	-	182103529	182110366	13244
ENSMUSG00000038702	Ensembl Gene Model	MGI:2442948	Dsel	dermatan sulfate epimerase-like	protein coding gene	1	-	111786432	111792648	319901
ENSMUSG00000038760	Ensembl Gene Model	MGI:98824	Trhr	thyrotropin releasing hormone receptor	protein coding gene	15	+	44059531	44099308	22045
ENSMUSG00000038776	Ensembl Gene Model	MGI:95405	Ephx1	epoxide hydrolase 1, microsomal	protein coding gene	1	-	180817121	180845134	13849
ENSMUSG00000038886	Ensembl Gene Model	MGI:2150656	Man2a2	mannosidase 2, alpha 2	protein coding gene	7	-	79998845	80021123	140481
ENSMUSG00000038954	Ensembl Gene Model	MGI:1923723	Supt3	SPT3, SAGA and STAGA complex component	protein coding gene	17	+	45088039	45430177	109115
ENSMUSG00000038967	Ensembl Gene Model	MGI:1343087	Pdk2	pyruvate dehydrogenase kinase, isoenzyme 2	protein coding gene	11	-	94917084	94932180	18604
ENSMUSG00000038975	Ensembl Gene Model	MGI:99537	Rabggtb	Rab geranylgeranyl transferase, b subunit	protein coding gene	3	-	153612926	153618603	19352
ENSMUSG00000038990	Ensembl Gene Model	MGI:2182335	Cables2	CDK5 and Abl enzyme substrate 2	protein coding gene	2	-	179900332	179915283	252966
ENSMUSG00000038991	Ensembl Gene Model	MGI:2145316	Txndc5	thioredoxin domain containing 5	protein coding gene	13	-	38684242	38712800	105245
ENSMUSG00000039047	Ensembl Gene Model	MGI:1913863	Pigk	phosphatidylinositol glycan anchor biosynthesis, class K	protein coding gene	3	+	152419718	152548705	329777
ENSMUSG00000039058	Ensembl Gene Model	MGI:2677491	Ak5	adenylate kinase 5	protein coding gene	3	-	152168452	152373997	229949
ENSMUSG00000039059	Ensembl Gene Model	MGI:2139279	Hrh3	histamine receptor H3	protein coding gene	2	-	179741258	179746281	99296
ENSMUSG00000039126	Ensembl Gene Model	MGI:1925004	Prune2	prune homolog 2	protein coding gene	19	+	16933482	17201296	353211
ENSMUSG00000039137	Ensembl Gene Model	MGI:2682003	Whrn	whirlin	protein coding gene	4	-	63333147	63414228	73750
ENSMUSG00000039158	Ensembl Gene Model	MGI:2140340	Akna	AT-hook transcription factor	protein coding gene	4	-	63285362	63321591	100182
ENSMUSG00000039232	Ensembl Gene Model	MGI:1921982	Stx11	syntaxin 11	protein coding gene	10	-	12813953	12840042	74732
ENSMUSG00000039252	Ensembl Gene Model	MGI:2180196	Lgi2	leucine-rich repeat LGI family, member 2	protein coding gene	5	-	52690859	52723689	246316
ENSMUSG00000039253	Ensembl Gene Model	MGI:2679256	Fn3krp	fructosamine 3 kinase related protein	protein coding gene	11	+	121312227	121322114	238024
ENSMUSG00000039257	Ensembl Gene Model	MGI:1914525	Vstm2b	V-set and transmembrane domain containing 2B	protein coding gene	7	+	40547334	40579468	58188
ENSMUSG00000039275	Ensembl Gene Model	MGI:1916087	Foxk2	forkhead box K2	protein coding gene	11	+	121150816	121200722	68837
ENSMUSG00000039313	Ensembl Gene Model	MGI:2667167	Minar1	membrane integral NOTCH2 associated receptor 1	protein coding gene	9	-	89469269	89505178	209743
ENSMUSG00000039316	Ensembl Gene Model	MGI:1923688	Rftn1	raftlin lipid raft linker 1	protein coding gene	17	-	50300287	50497525	76438
ENSMUSG00000039384	Ensembl Gene Model	MGI:1927070	Dusp10	dual specificity phosphatase 10	protein coding gene	1	+	183766575	183807833	63953
ENSMUSG00000039419	Ensembl Gene Model	MGI:1914047	Cntnap2	contactin associated protein-like 2	protein coding gene	6	+	45036995	47278330	66797
ENSMUSG00000039450	Ensembl Gene Model	MGI:1915130	Dcxr	dicarbonyl L-xylulose reductase	protein coding gene	11	-	120616225	120618107	67880
ENSMUSG00000039474	Ensembl Gene Model	MGI:1328355	Wfs1	wolframin ER transmembrane glycoprotein	protein coding gene	5	-	37123448	37146326	22393
ENSMUSG00000039533	Ensembl Gene Model	MGI:1922354	Mmd2	monocyte to macrophage differentiation-associated 2	protein coding gene	5	-	142549229	142594886	75104
ENSMUSG00000039546	Ensembl Gene Model	MGI:2685419	Ajap1	adherens junction associated protein 1	protein coding gene	4	-	153457678	153567268	230959
ENSMUSG00000039607	Ensembl Gene Model	MGI:2444477	Rbms3	RNA binding motif, single stranded interacting protein	protein coding gene	9	-	116401814	117701749	207181
ENSMUSG00000039621	Ensembl Gene Model	MGI:3040696	Prex1	phosphatidylinositol-3,4,5-trisphosphate-dependent Rac exchange factor 1	protein coding gene	2	-	166408265	166555752	277360
ENSMUSG00000039648	Ensembl Gene Model	MGI:1917516	Kyat1	kynurenine aminotransferase 1	protein coding gene	2	-	30075136	30095859	70266
ENSMUSG00000039660	Ensembl Gene Model	MGI:106544	Spout1	SPOUT domain containing methyltransferase 1	protein coding gene	2	-	30063465	30068471	227695
ENSMUSG00000039682	Ensembl Gene Model	MGI:1914238	Lap3	leucine aminopeptidase 3	protein coding gene	5	+	45650716	45670033	66988
ENSMUSG00000039693	Ensembl Gene Model	MGI:1913915	Msantd3	Myb/SANT-like DNA-binding domain containing 3	protein coding gene	4	+	48539935	48561919	66665
ENSMUSG00000039697	Ensembl Gene Model	MGI:2444847	Ncoa7	nuclear receptor coactivator 7	protein coding gene	10	-	30521578	30683401	211329
ENSMUSG00000039706	Ensembl Gene Model	MGI:894670	Ldb2	LIM domain binding 2	protein coding gene	5	-	44629474	44957022	16826
ENSMUSG00000039714	Ensembl Gene Model	MGI:2384571	Cplx3	complexin 3	protein coding gene	9	-	57507275	57513564	235415
ENSMUSG00000039770	Ensembl Gene Model	MGI:1916937	Ypel5	yippee like 5	protein coding gene	17	+	73143623	73157439	383295
ENSMUSG00000039844	Ensembl Gene Model	MGI:104580	Rapgef1	Rap guanine nucleotide exchange factor (GEF) 1	protein coding gene	2	+	29509732	29630376	107746
ENSMUSG00000039917	Ensembl Gene Model	MGI:1915612	Rhbdd2	rhomboid domain containing 2	protein coding gene	5	+	135661508	135675230	215160
ENSMUSG00000040007	Ensembl Gene Model	MGI:2139371	Bahd1	bromo adjacent homology domain containing 1	protein coding gene	2	+	118730858	118755009	228536
ENSMUSG00000040010	Ensembl Gene Model	MGI:1298205	Slc7a5	solute carrier family 7 (cationic amino acid transporter, y+ system), member 5	protein coding gene	8	-	122607885	122634425	20539
ENSMUSG00000040035	Ensembl Gene Model	MGI:2388733	Disp2	dispatched RND tramsporter family member 2	protein coding gene	2	+	118610183	118625656	214240
ENSMUSG00000040102	Ensembl Gene Model	MGI:2444786	Klhl42	kelch-like 42	protein coding gene	6	+	146992877	147014276	232539
ENSMUSG00000040105	Ensembl Gene Model	MGI:1921661	Plpp6	phospholipid phosphatase 6	protein coding gene	19	+	28941353	28944211	74411
ENSMUSG00000040111	Ensembl Gene Model	MGI:1925037	Gramd1b	GRAM domain containing 1B	protein coding gene	9	-	40204529	40442679	235283
ENSMUSG00000040183	Ensembl Gene Model	MGI:2154278	Ankrd6	ankyrin repeat domain 6	protein coding gene	4	-	32804035	32950841	140577
ENSMUSG00000040234	Ensembl Gene Model	MGI:1914873	Tm7sf3	transmembrane 7 superfamily member 3	protein coding gene	6	-	146503774	146536103	67623
ENSMUSG00000040269	Ensembl Gene Model	MGI:1913480	Mrps28	mitochondrial ribosomal protein S28	protein coding gene	3	-	8867206	8988917	66230
ENSMUSG00000040282	Ensembl Gene Model	MGI:3026886	Cdin1	CDAN1 interacting nuclease 1	protein coding gene	2	+	115412197	115609249	399568
ENSMUSG00000040331	Ensembl Gene Model	MGI:1915122	Nsmce4a	NSE4 homolog A, SMC5-SMC6 complex component	protein coding gene	7	-	130134256	130149111	67872
ENSMUSG00000040354	Ensembl Gene Model	MGI:1345633	Mars1	methionine-tRNA synthetase 1	protein coding gene	10	-	127132090	127147655	216443
ENSMUSG00000040363	Ensembl Gene Model	MGI:1918708	Bcor	BCL6 interacting corepressor	protein coding gene	X	-	11902979	12026594	71458
ENSMUSG00000040373	Ensembl Gene Model	MGI:2157946	Cacng5	calcium channel, voltage-dependent, gamma subunit 5	protein coding gene	11	-	107765431	107805881	140723
ENSMUSG00000040410	Ensembl Gene Model	MGI:2140367	Fbxl4	F-box and leucine-rich repeat protein 4	protein coding gene	4	+	22357543	22434091	269514
ENSMUSG00000040447	Ensembl Gene Model	MGI:2384936	Spns2	spinster homolog 2	protein coding gene	11	-	72342464	72380730	216892
ENSMUSG00000040479	Ensembl Gene Model	MGI:1278339	Dgkz	diacylglycerol kinase zeta	protein coding gene	2	-	91763169	91806209	104418
ENSMUSG00000040495	Ensembl Gene Model	MGI:88399	Chrm4	cholinergic receptor, muscarinic 4	protein coding gene	2	+	91757594	91759033	12672
ENSMUSG00000040557	Ensembl Gene Model	MGI:1933146	Mettl27	methyltransferase like 27	protein coding gene	5	+	134961222	134971491	79565
ENSMUSG00000040606	Ensembl Gene Model	MGI:1918779	Kazn	kazrin, periplakin interacting protein	protein coding gene	4	-	141829701	142205056	71529
ENSMUSG00000040631	Ensembl Gene Model	MGI:2148865	Dok4	docking protein 4	protein coding gene	8	-	95590456	95602940	114255
ENSMUSG00000040669	Ensembl Gene Model	MGI:103248	Phc1	polyhomeotic 1	protein coding gene	6	-	122294690	122317520	13619
ENSMUSG00000040697	Ensembl Gene Model	MGI:2442146	Dnajc16	DnaJ heat shock protein family (Hsp40) member C16	protein coding gene	4	-	141487500	141518242	214063
ENSMUSG00000040711	Ensembl Gene Model	MGI:2442062	Sh3pxd2b	SH3 and PX domains 2B	protein coding gene	11	+	32297820	32378173	268396
ENSMUSG00000040713	Ensembl Gene Model	MGI:1344382	Creg1	cellular repressor of E1A-stimulated genes 1	protein coding gene	1	+	165591327	165602878	433375
ENSMUSG00000040759	Ensembl Gene Model	MGI:2447164	Cmtm5	CKLF-like MARVEL transmembrane domain containing 5	protein coding gene	14	+	55173927	55176734	67272
ENSMUSG00000040797	Ensembl Gene Model	MGI:2677208	Iqsec3	IQ motif and Sec7 domain 3	protein coding gene	6	-	121349892	121450637	243621
ENSMUSG00000040848	Ensembl Gene Model	MGI:1917362	Sft2d2	SFT2 domain containing 2	protein coding gene	1	-	165001906	165022007	108735
ENSMUSG00000040907	Ensembl Gene Model	MGI:88107	Atp1a3	ATPase, Na+/K+ transporting, alpha 3 polypeptide	protein coding gene	7	-	24677592	24705383	232975
ENSMUSG00000040972	Ensembl Gene Model	MGI:2681842	Igsf21	immunoglobulin superfamily, member 21	protein coding gene	4	-	139754157	139974095	230868
ENSMUSG00000040997	Ensembl Gene Model	MGI:1915938	Abhd4	abhydrolase domain containing 4	protein coding gene	14	+	54491586	54506626	105501
ENSMUSG00000041000	Ensembl Gene Model	MGI:1914775	Trim62	tripartite motif-containing 62	protein coding gene	4	+	128777837	128805119	67525
ENSMUSG00000041028	Ensembl Gene Model	MGI:1913342	Ghitm	growth hormone inducible transmembrane protein	protein coding gene	14	-	36842401	36857279	66092
ENSMUSG00000041078	Ensembl Gene Model	MGI:95812	Grid1	glutamate receptor, ionotropic, delta 1	protein coding gene	14	+	34542065	35305336	14803
ENSMUSG00000041132	Ensembl Gene Model	MGI:2140872	N4bp2l1	NEDD4 binding protein 2-like 1	protein coding gene	5	-	150495108	150518288	100637
ENSMUSG00000041205	Ensembl Gene Model	MGI:3607784	Map6d1	MAP6 domain containing 1	protein coding gene	16	-	20052059	20060108	208158
ENSMUSG00000041329	Ensembl Gene Model	MGI:88109	Atp1b2	ATPase, Na+/K+ transporting, beta 2 polypeptide	protein coding gene	11	-	69490562	69496768	11932
ENSMUSG00000041351	Ensembl Gene Model	MGI:109338	Rap1gap	Rap1 GTPase-activating protein	protein coding gene	4	+	137392037	137457172	110351
ENSMUSG00000041380	Ensembl Gene Model	MGI:96281	Htr2c	5-hydroxytryptamine (serotonin) receptor 2C	protein coding gene	X	+	145745509	145980273	15560
ENSMUSG00000041426	Ensembl Gene Model	MGI:1923792	Hibch	3-hydroxyisobutyryl-Coenzyme A hydrolase	protein coding gene	1	+	52884197	52960145	227095
ENSMUSG00000041468	Ensembl Gene Model	MGI:101909	Gpr12	G-protein coupled receptor 12	protein coding gene	5	-	146519208	146522049	14738
ENSMUSG00000041482	Ensembl Gene Model	MGI:1918781	Piezo2	piezo-type mechanosensitive ion channel component 2	protein coding gene	18	-	63143284	63520254	667742
ENSMUSG00000041544	Ensembl Gene Model	MGI:2444403	Disp3	dispatched RND transporter family member 3	protein coding gene	4	-	148324721	148372422	242748
ENSMUSG00000041556	Ensembl Gene Model	MGI:2446216	Fbxo2	F-box protein 2	protein coding gene	4	+	148245078	148250881	230904
ENSMUSG00000041565	Ensembl Gene Model	MGI:2444889	L3mbtl4	L3MBTL4 histone methyl-lysine binding protein	protein coding gene	17	+	68580792	69087081	320858
ENSMUSG00000041608	Ensembl Gene Model	MGI:1321386	Entpd3	ectonucleoside triphosphate diphosphohydrolase 3	protein coding gene	9	+	120368884	120397393	215446
ENSMUSG00000041650	Ensembl Gene Model	MGI:97499	Pcca	propionyl-Coenzyme A carboxylase, alpha polypeptide	protein coding gene	14	+	122771736	123128512	110821
ENSMUSG00000041654	Ensembl Gene Model	MGI:1917056	Slc39a11	solute carrier family 39 (metal ion transporter), member 11	protein coding gene	11	-	113135679	113540905	69806
ENSMUSG00000041708	Ensembl Gene Model	MGI:106316	Mpped1	metallophosphoesterase domain containing 1	protein coding gene	15	+	83663668	83742695	223726
ENSMUSG00000041712	Ensembl Gene Model	MGI:1913872	Ubr7	ubiquitin protein ligase E3 component n-recognin 7 (putative)	protein coding gene	12	+	102724234	102743960	66622
ENSMUSG00000041729	Ensembl Gene Model	MGI:2444283	Coro2b	coronin, actin binding protein, 2B	protein coding gene	9	-	62326774	62444326	235431
ENSMUSG00000041828	Ensembl Gene Model	MGI:2386846	Abca8a	ATP-binding cassette, sub-family A (ABC1), member 8a	protein coding gene	11	-	109916460	109986804	217258
ENSMUSG00000041870	Ensembl Gene Model	MGI:1915670	Ankrd13a	ankyrin repeat domain 13a	protein coding gene	5	+	114913009	114943882	68420
ENSMUSG00000041889	Ensembl Gene Model	MGI:1924802	Shisa4	shisa family member 4	protein coding gene	1	-	135299194	135302801	77552
ENSMUSG00000041895	Ensembl Gene Model	MGI:1261864	Wipi1	WD repeat domain, phosphoinositide interacting 1	protein coding gene	11	-	109464347	109502215	52639
ENSMUSG00000041911	Ensembl Gene Model	MGI:94901	Dlx1	distal-less homeobox 1	protein coding gene	2	+	71358457	71364325	13390
ENSMUSG00000041945	Ensembl Gene Model	MGI:2443548	Mfsd9	major facilitator superfamily domain containing 9	protein coding gene	1	-	40811200	40829817	211798
ENSMUSG00000041995	Ensembl Gene Model	MGI:1919364	Zbed3	zinc finger, BED type containing 3	protein coding gene	13	+	95460120	95474349	72114
ENSMUSG00000042099	Ensembl Gene Model	MGI:1098615	Kank3	KN motif and ankyrin repeat domains 3	protein coding gene	17	+	34029497	34041894	80880
ENSMUSG00000042121	Ensembl Gene Model	MGI:2686240	Ssh1	slingshot protein phosphatase 1	protein coding gene	5	-	114075155	114131864	231637
ENSMUSG00000042129	Ensembl Gene Model	MGI:2386853	Rassf4	Ras association (RalGDS/AF-6) domain family member 4	protein coding gene	6	-	116609969	116650797	213391
ENSMUSG00000042148	Ensembl Gene Model	MGI:1917633	Cox10	heme A:farnesyltransferase cytochrome c oxidase assembly factor 10	protein coding gene	11	-	63853453	63970294	70383
ENSMUSG00000042155	Ensembl Gene Model	MGI:2683536	Klhl23	kelch-like 23	protein coding gene	2	+	69652288	69666995	277396
ENSMUSG00000042167	Ensembl Gene Model	MGI:2140950	Tent2	terminal nucleotidyltransferase 2	protein coding gene	13	-	93282790	93328893	100715
ENSMUSG00000042178	Ensembl Gene Model	MGI:2384586	Armc5	armadillo repeat containing 5	protein coding gene	7	+	127836514	127844272	233912
ENSMUSG00000042182	Ensembl Gene Model	MGI:2444572	Bend6	BEN domain containing 6	protein coding gene	1	-	33891133	33946897	320705
ENSMUSG00000042195	Ensembl Gene Model	MGI:1919272	Slc35f2	solute carrier family 35, member F2	protein coding gene	9	+	53678822	53725438	72022
ENSMUSG00000042210	Ensembl Gene Model	MGI:1915894	Abhd14a	abhydrolase domain containing 14A	protein coding gene	9	-	106317250	106324877	68644
ENSMUSG00000042215	Ensembl Gene Model	MGI:1891254	Bag2	BCL2-associated athanogene 2	protein coding gene	1	-	33784565	33796831	213539
ENSMUSG00000042389	Ensembl Gene Model	MGI:2141599	Tsen2	tRNA splicing endonuclease subunit 2	protein coding gene	6	+	115521587	115555311	381802
ENSMUSG00000042406	Ensembl Gene Model	MGI:88096	Atf4	activating transcription factor 4	protein coding gene	15	+	80139385	80141742	11911
ENSMUSG00000042417	Ensembl Gene Model	MGI:2145534	Ccno	cyclin O	protein coding gene	13	+	113124336	113127311	218630
ENSMUSG00000042498	Ensembl Gene Model	MGI:2147848	Radx	RPA1 related single stranded DNA binding protein, X-linked	protein coding gene	X	+	138381116	138455331	102871
ENSMUSG00000042502	Ensembl Gene Model	MGI:1917483	Cd2bp2	CD2 cytoplasmic tail binding protein 2	protein coding gene	7	-	126790832	126795222	70233
ENSMUSG00000042506	Ensembl Gene Model	MGI:2144157	Usp22	ubiquitin specific peptidase 22	protein coding gene	11	-	61042611	61065881	216825
ENSMUSG00000042514	Ensembl Gene Model	MGI:1921249	Klhl14	kelch-like 14	protein coding gene	18	-	21683434	21787775	225266
ENSMUSG00000042535	Ensembl Gene Model	MGI:109443	Gtpbp1	GTP binding protein 1	protein coding gene	15	+	79575046	79605680	14904
ENSMUSG00000042572	Ensembl Gene Model	MGI:1917343	Ube2q1	ubiquitin-conjugating enzyme E2Q family member 1	protein coding gene	3	+	89680923	89691307	70093
ENSMUSG00000042589	Ensembl Gene Model	MGI:107321	Cux2	cut-like homeobox 2	protein coding gene	5	-	121996025	122188522	13048
ENSMUSG00000042594	Ensembl Gene Model	MGI:893598	Sh2b3	SH2B adaptor protein 3	protein coding gene	5	-	121953551	121975709	16923
ENSMUSG00000042605	Ensembl Gene Model	MGI:1277223	Atxn2	ataxin 2	protein coding gene	5	+	121849672	121954372	20239
ENSMUSG00000042608	Ensembl Gene Model	MGI:1921428	Stk40	serine/threonine kinase 40	protein coding gene	4	+	125997750	126034822	74178
ENSMUSG00000042613	Ensembl Gene Model	MGI:2441670	Pbxip1	pre B cell leukemia transcription factor interacting protein 1	protein coding gene	3	+	89344013	89358259	229534
ENSMUSG00000042644	Ensembl Gene Model	MGI:96624	Itpr3	inositol 1,4,5-triphosphate receptor 3	protein coding gene	17	+	27276278	27341197	16440
ENSMUSG00000042647	Ensembl Gene Model	MGI:2443320	Acad12	acyl-Coenzyme A dehydrogenase family, member 12	protein coding gene	5	-	121736340	121757001	338350
ENSMUSG00000042659	Ensembl Gene Model	MGI:1913662	Arrdc4	arrestin domain containing 4	protein coding gene	7	-	68386742	68398986	66412
ENSMUSG00000042671	Ensembl Gene Model	MGI:108408	Rgs8	regulator of G-protein signaling 8	protein coding gene	1	+	153528612	153573415	67792
ENSMUSG00000042705	Ensembl Gene Model	MGI:1916706	Commd10	COMM domain containing 10	protein coding gene	18	+	47091886	47221062	69456
ENSMUSG00000042743	Ensembl Gene Model	MGI:2444615	Sgtb	small glutamine-rich tetratricopeptide repeat (TPR)-containing, beta	protein coding gene	13	+	104246249	104278243	218544
ENSMUSG00000042747	Ensembl Gene Model	MGI:1913309	Krtcap2	keratinocyte associated protein 2	protein coding gene	3	+	89153201	89157036	66059
ENSMUSG00000042763	Ensembl Gene Model	MGI:2684896	Maneal	mannosidase, endo-alpha-like	protein coding gene	4	-	124749032	124755964	215090
ENSMUSG00000042797	Ensembl Gene Model	MGI:1913583	Aqp11	aquaporin 11	protein coding gene	7	-	97375586	97387454	66333
ENSMUSG00000042826	Ensembl Gene Model	MGI:109167	Fgf11	fibroblast growth factor 11	protein coding gene	11	-	69686894	69692683	14166
ENSMUSG00000042870	Ensembl Gene Model	MGI:1338026	Tom1	target of myb1 trafficking protein	protein coding gene	8	+	75760333	75796749	21968
ENSMUSG00000042901	Ensembl Gene Model	MGI:1919737	Aida	axin interactor, dorsalization associated	protein coding gene	1	+	183078604	183105356	108909
ENSMUSG00000043067	Ensembl Gene Model	MGI:1915685	Dpy19l1	dpy-19-like 1 (C. elegans)	protein coding gene	9	-	24323074	24414436	244745
ENSMUSG00000043262	Ensembl Gene Model	MGI:1860490	Uevld	UEV and lactate/malate dehyrogenase domains	protein coding gene	7	-	46572964	46608275	54122
ENSMUSG00000043289	Ensembl Gene Model	MGI:1922283	Mei4	meiotic double-stranded break formation protein 4	protein coding gene	9	+	81745723	82088060	75033
ENSMUSG00000043439	Ensembl Gene Model	MGI:2143991	Epop	elongin BC and polycomb repressive complex 2 associated protein	protein coding gene	11	-	97518215	97520528	103551
ENSMUSG00000043460	Ensembl Gene Model	MGI:3608416	Elfn2	leucine rich repeat and fibronectin type III, extracellular 2	protein coding gene	15	-	78551531	78602971	207393
ENSMUSG00000043510	Ensembl Gene Model	MGI:2141135	Hscb	HscB iron-sulfur cluster co-chaperone	protein coding gene	5	-	110976936	110987643	100900
ENSMUSG00000043557	Ensembl Gene Model	MGI:1922012	Mdga1	MAM domain containing glycosylphosphatidylinositol anchor 1	protein coding gene	17	-	30046930	30107557	74762
ENSMUSG00000043629	Ensembl Gene Model	MGI:1914330	1700019D03Rik	RIKEN cDNA 1700019D03 gene	protein coding gene	1	-	52961483	53031816	67080
ENSMUSG00000043648	Ensembl Gene Model	MGI:2687283	Pld6	phospholipase D family, member 6	protein coding gene	11	-	59674723	59678471	194908
ENSMUSG00000043668	Ensembl Gene Model	MGI:3039593	Tox3	TOX high mobility group box family member 3	protein coding gene	8	-	90973668	91074971	244579
ENSMUSG00000043811	Ensembl Gene Model	MGI:2136886	Rtn4r	reticulon 4 receptor	protein coding gene	16	+	17945506	17970272	65079
ENSMUSG00000043843	Ensembl Gene Model	MGI:3607779	Tmem145	transmembrane protein 145	protein coding gene	7	+	25005531	25015620	330485
ENSMUSG00000043857	Ensembl Gene Model	MGI:3606200	Mgat5b	mannoside acetylglucosaminyltransferase 5, isoenzyme B	protein coding gene	11	+	116809689	116877774	268510
ENSMUSG00000043885	Ensembl Gene Model	MGI:2442595	Slc36a4	solute carrier family 36 (proton/amino acid symporter), member 4	protein coding gene	9	+	15621034	15653684	234967
ENSMUSG00000043895	Ensembl Gene Model	MGI:99569	S1pr2	sphingosine-1-phosphate receptor 2	protein coding gene	9	-	20877248	20888089	14739
ENSMUSG00000043964	Ensembl Gene Model	MGI:3039586	Orai3	ORAI calcium release-activated calcium modulator 3	protein coding gene	7	+	127368987	127374322	269999
ENSMUSG00000044024	Ensembl Gene Model	MGI:1918044	Rell2	RELT-like 2	protein coding gene	18	+	38088132	38092232	225392
ENSMUSG00000044037	Ensembl Gene Model	MGI:2447532	Als2cl	ALS2 C-terminal like	protein coding gene	9	+	110709203	110729598	235633
ENSMUSG00000044197	Ensembl Gene Model	MGI:1933113	Gpr146	G protein-coupled receptor 146	protein coding gene	5	+	139363452	139382170	80290
ENSMUSG00000044328	Ensembl Gene Model	MGI:1915125	Trp53i13	transformation related protein 53 inducible protein 13	protein coding gene	11	-	77398925	77404214	216964
ENSMUSG00000044337	Ensembl Gene Model	MGI:109562	Ackr3	atypical chemokine receptor 3	protein coding gene	1	+	90131702	90143446	12778
ENSMUSG00000044352	Ensembl Gene Model	MGI:2687280	Sowaha	sosondowah ankyrin repeat domain family member A	protein coding gene	11	-	53367405	53371022	237761
ENSMUSG00000044408	Ensembl Gene Model	MGI:1913399	Sptssa	serine palmitoyltransferase, small subunit A	protein coding gene	12	-	54692177	54703358	104725
ENSMUSG00000044548	Ensembl Gene Model	MGI:1891740	Dact1	dishevelled-binding antagonist of beta-catenin 1	protein coding gene	12	+	71356658	71366881	59036
ENSMUSG00000044576	Ensembl Gene Model	MGI:2685290	Garem2	GRB2 associated regulator of MAPK1 subtype 2	protein coding gene	5	+	30310194	30323378	242915
ENSMUSG00000044628	Ensembl Gene Model	MGI:1916096	Rnf208	ring finger protein 208	protein coding gene	2	+	25132941	25134273	68846
ENSMUSG00000044646	Ensembl Gene Model	MGI:2443302	Zbtb7c	zinc finger and BTB domain containing 7C	protein coding gene	18	+	75953249	76281635	207259
ENSMUSG00000044674	Ensembl Gene Model	MGI:1196625	Fzd1	frizzled class receptor 1	protein coding gene	5	-	4803839	4808035	14362
ENSMUSG00000044847	Ensembl Gene Model	MGI:1919540	Lsm11	U7 snRNP-specific Sm-like protein LSM11	protein coding gene	11	-	45819096	45835762	72290
ENSMUSG00000044912	Ensembl Gene Model	MGI:2673872	Syt16	synaptotagmin XVI	protein coding gene	12	+	74044490	74314690	238266
ENSMUSG00000044934	Ensembl Gene Model	MGI:2442266	Zfp367	zinc finger protein 367	protein coding gene	13	-	64280836	64301013	238673
ENSMUSG00000044968	Ensembl Gene Model	MGI:2140885	Napepld	N-acyl phosphatidylethanolamine phospholipase D	protein coding gene	5	-	21867899	21906394	242864
ENSMUSG00000045005	Ensembl Gene Model	MGI:108571	Fzd5	frizzled class receptor 5	protein coding gene	1	-	64769717	64776909	14367
ENSMUSG00000045007	Ensembl Gene Model	MGI:2144208	Tubg2	tubulin, gamma 2	protein coding gene	11	+	101046733	101052613	103768
ENSMUSG00000045092	Ensembl Gene Model	MGI:1096355	S1pr1	sphingosine-1-phosphate receptor 1	protein coding gene	3	-	115504082	115508704	13609
ENSMUSG00000045114	Ensembl Gene Model	MGI:1916267	Prrt2	proline-rich transmembrane protein 2	protein coding gene	7	-	126616703	126620383	69017
ENSMUSG00000045216	Ensembl Gene Model	MGI:1354958	Hs6st1	heparan sulfate 6-O-sulfotransferase 1	protein coding gene	1	+	36107481	36145527	50785
ENSMUSG00000045287	Ensembl Gene Model	MGI:2661375	Rtn4rl1	reticulon 4 receptor-like 1	protein coding gene	11	+	75084819	75158595	237847
ENSMUSG00000045312	Ensembl Gene Model	MGI:2145236	Lhfpl2	lipoma HMGIC fusion partner-like 2	protein coding gene	13	+	94194304	94331917	218454
ENSMUSG00000045318	Ensembl Gene Model	MGI:87936	Adra2c	adrenergic receptor, alpha 2c	protein coding gene	5	+	35435910	35439107	11553
ENSMUSG00000045362	Ensembl Gene Model	MGI:2651928	Tnfrsf26	tumor necrosis factor receptor superfamily, member 26	protein coding gene	7	-	143161422	143181690	244237
ENSMUSG00000045594	Ensembl Gene Model	MGI:88151	Glb1	galactosidase, beta 1	protein coding gene	9	+	114230146	114303447	12091
ENSMUSG00000045664	Ensembl Gene Model	MGI:1929744	Cdc42ep2	CDC42 effector protein (Rho GTPase binding) 2	protein coding gene	19	-	5967584	5974844	104252
ENSMUSG00000045725	Ensembl Gene Model	MGI:1925254	Prr15	proline rich 15	protein coding gene	6	+	54302820	54307186	78004
ENSMUSG00000045731	Ensembl Gene Model	MGI:105308	Pnoc	prepronociceptin	protein coding gene	14	-	65638122	65662921	18155
ENSMUSG00000045733	Ensembl Gene Model	MGI:3582583	Sprn	shadow of prion protein	protein coding gene	7	-	139730541	139734572	212518
ENSMUSG00000045912	Ensembl Gene Model	MGI:2685084	C2cd4c	C2 calcium-dependent domain containing 4C	protein coding gene	10	-	79442688	79449859	237397
ENSMUSG00000045917	Ensembl Gene Model	MGI:1913920	Tmem268	transmembrane protein 268	protein coding gene	4	+	63477018	63504594	230279
ENSMUSG00000045980	Ensembl Gene Model	MGI:2444222	Tmem104	transmembrane protein 104	protein coding gene	11	+	115078313	115137849	320534
ENSMUSG00000045994	Ensembl Gene Model	MGI:1924148	B3gat1	beta-1,3-glucuronyltransferase 1 (glucuronosyltransferase P)	protein coding gene	9	+	26644813	26672646	76898
ENSMUSG00000046027	Ensembl Gene Model	MGI:2156765	Stard5	StAR-related lipid transfer (START) domain containing 5	protein coding gene	7	+	83281225	83291536	170460
ENSMUSG00000046093	Ensembl Gene Model	MGI:2157521	Hpcal4	hippocalcin-like 4	protein coding gene	4	+	123077297	123088492	170638
ENSMUSG00000046178	Ensembl Gene Model	MGI:107492	Nxph1	neurexophilin 1	protein coding gene	6	+	8948431	9249032	18231
[truncated: 351 more rows]

## Sheet: Genes Removed From Signatures
Removed from:	Narrow Signature - Up	Narrow Signature - Down	Broad Signature - Up	Broad Signature - Down
[truncated: 34 more rows]
