# Supplementary material for: Identification of a transcriptional signature found in multiple models of ASD and related disorders
Source: HighWire-hosted journal article supplement (doi:10.1101/gr.276591.122), 2022-09-01
Supplement: Supplemental_Table_S3.xlsx [file Supplemental_Table_S3.xlsx]

## Sheet: Legend
Supplemental_Table_S3
Raw PANTHER (Mi et al., 2021) results; run on up- and down-regulated broad signatures.

## Sheet: Broad Signature - Down
Analysis Type:	PANTHER Overrepresentation Test (Released 20220202)
Annotation Version and Release Date:	GO Ontology database DOI: 10.5281/zenodo.6399963 Released 2022-03-22
Analyzed List:	Broad Down Regulated Signature Genes
Reference List:	ALCM_vLucif_limmaDEAnalysis_backgroundMin5_ensembl.txt (Mus musculus)
Test Type:	FISHER
Correction:	FDR
GO biological process complete	ALCM_vLucif_limmaDEAnalysis_backgroundMin5_ensembl.txt - REFLIST (14569)	Broad Down Regulated Signature Genes (1490)	Broad Down Regulated Signature Genes (expected)	Broad Down Regulated Signature Genes (over/under)	Broad Down Regulated Signature Genes (fold Enrichment)	Broad Down Regulated Signature Genes (raw P-value)	Broad Down Regulated Signature Genes (FDR)
neutral amino acid transport (GO:0015804)	30	15	3.07	+	4.89	7.14e-06	0.00596
sodium ion transmembrane transport (GO:0035725)	70	21	7.16	+	2.93	6.95e-05	0.0243
amino acid transport (GO:0006865)	98	27	10.02	+	2.69	2.95e-05	0.013
response to calcium ion (GO:0051592)	107	29	10.94	+	2.65	1.79e-05	0.0107
neurotransmitter transport (GO:0006836)	113	27	11.56	+	2.34	0.000207	0.0487
alpha-amino acid metabolic process (GO:1901605)	147	34	15.03	+	2.26	7.78e-05	0.0266
memory (GO:0007613)	147	34	15.03	+	2.26	7.78e-05	0.026
organic anion transport (GO:0015711)	210	47	21.48	+	2.19	6.04e-06	0.00534
cellular amino acid metabolic process (GO:0006520)	216	48	22.09	+	2.17	5.13e-06	0.00593
regulation of nervous system process (GO:0031644)	156	34	15.95	+	2.13	0.000203	0.0485
carboxylic acid transport (GO:0046942)	167	36	17.08	+	2.11	0.000133	0.037
regulation of synaptic plasticity (GO:0048167)	209	45	21.37	+	2.11	2.52e-05	0.0115
carboxylic acid catabolic process (GO:0046395)	163	35	16.67	+	2.1	0.000179	0.0472
response to metal ion (GO:0010038)	234	50	23.93	+	2.09	1.06e-05	0.00755
organic acid catabolic process (GO:0016054)	164	35	16.77	+	2.09	0.000192	0.0466
small molecule catabolic process (GO:0044282)	252	52	25.77	+	2.02	1.39e-05	0.0095
oxoacid metabolic process (GO:0043436)	614	122	62.79	+	1.94	1.69e-10	1.27e-06
learning or memory (GO:0007611)	277	55	28.33	+	1.94	2.11e-05	0.0106
carboxylic acid metabolic process (GO:0019752)	606	119	61.98	+	1.92	4.75e-10	1.78e-06
cognition (GO:0050890)	306	60	31.3	+	1.92	1.45e-05	0.00951
organic acid metabolic process (GO:0006082)	630	123	64.43	+	1.91	2.94e-10	1.47e-06
anion transport (GO:0006820)	297	55	30.37	+	1.81	0.000121	0.0357
response to inorganic substance (GO:0010035)	374	69	38.25	+	1.8	1.91e-05	0.0106
carbohydrate metabolic process (GO:0005975)	344	62	35.18	+	1.76	8.54e-05	0.0267
monocarboxylic acid metabolic process (GO:0032787)	363	64	37.12	+	1.72	0.000126	0.0364
regulation of ion transport (GO:0043269)	587	103	60.03	+	1.72	1.14e-06	0.00171
small molecule metabolic process (GO:0044281)	1210	212	123.75	+	1.71	6.77e-13	1.02e-08
modulation of chemical synaptic transmission (GO:0050804)	458	79	46.84	+	1.69	3.88e-05	0.0158
regulation of trans-synaptic signaling (GO:0099177)	459	79	46.94	+	1.68	3.96e-05	0.0157
metal ion transport (GO:0030001)	470	80	48.07	+	1.66	4.83e-05	0.0182
cation transmembrane transport (GO:0098655)	400	68	40.91	+	1.66	0.000184	0.0453
ion transmembrane transport (GO:0034220)	521	88	53.28	+	1.65	2.41e-05	0.0113
cation transport (GO:0006812)	583	98	59.62	+	1.64	1.02e-05	0.00766
behavior (GO:0007610)	594	98	60.75	+	1.61	2.19e-05	0.0106
cellular lipid metabolic process (GO:0044255)	707	113	72.31	+	1.56	1.83e-05	0.0106
lipid metabolic process (GO:0006629)	909	145	92.97	+	1.56	9.1e-07	0.00152
ion transport (GO:0006811)	855	131	87.44	+	1.5	2.01e-05	0.0108
transmembrane transport (GO:0055085)	771	117	78.85	+	1.48	8.2e-05	0.0262
regulation of transport (GO:0051049)	1507	208	154.12	+	1.35	3.35e-05	0.014
nervous system development (GO:0007399)	1637	220	167.42	+	1.31	8.86e-05	0.0272
regulation of localization (GO:0032879)	2376	304	243	+	1.25	8.03e-05	0.0262
regulation of biological quality (GO:0065008)	3038	375	310.7	+	1.21	0.000149	0.0399
regulation of nucleobase-containing compound metabolic process (GO:0019219)	3014	247	308.25	-	0.8	0.000132	0.0375
regulation of gene expression (GO:0010468)	3598	287	367.97	-	0.78	2.16e-06	0.00295
organelle organization (GO:0006996)	2762	220	282.48	-	0.78	5.65e-05	0.0207
gene expression (GO:0010467)	1659	119	169.67	-	0.7	4.45e-05	0.0171
nucleic acid metabolic process (GO:0090304)	1619	100	165.58	-	0.6	4.36e-08	0.000109
RNA metabolic process (GO:0016070)	1104	66	112.91	-	0.58	2.93e-06	0.00368
organelle assembly (GO:0070925)	661	36	67.6	-	0.53	5.69e-05	0.0204
chromosome organization (GO:0051276)	718	39	73.43	-	0.53	2.11e-05	0.0109
microtubule-based process (GO:0007017)	670	29	68.52	-	0.42	2.27e-07	0.000488
microtubule cytoskeleton organization (GO:0000226)	456	18	46.64	-	0.39	5.57e-06	0.00523
RNA processing (GO:0006396)	698	26	71.39	-	0.36	2.5e-09	7.53e-06
mRNA metabolic process (GO:0016071)	501	18	51.24	-	0.35	2.94e-07	0.000552
mRNA processing (GO:0006397)	370	13	37.84	-	0.34	1.02e-05	0.00804
ribonucleoprotein complex biogenesis (GO:0022613)	362	12	37.02	-	0.32	5.33e-06	0.00535
ribosome biogenesis (GO:0042254)	259	8	26.49	-	0.3	0.000104	0.0312
sensory perception of smell (GO:0007608)	248	6	25.36	-	0.24	1.59e-05	0.00996
mRNA splicing, via spliceosome (GO:0000398)	183	4	18.72	-	0.21	0.000181	0.0468
RNA splicing, via transesterification reactions with bulged adenosine as nucleophile (GO:0000377)	183	4	18.72	-	0.21	0.000181	0.046
RNA splicing, via transesterification reactions (GO:0000375)	183	4	18.72	-	0.21	0.000181	0.0453
regulation of mRNA catabolic process (GO:0061013)	145	2	14.83	-	0.13	0.000147	0.0403
regulation of RNA stability (GO:0043487)	142	1	14.52	-	0.07	2.95e-05	0.0127
regulation of mRNA stability (GO:0043488)	131	0	13.4	-	< 0.01	5.27e-06	0.00566

## Sheet: Broad Signature - Up
Analysis Type:	PANTHER Overrepresentation Test (Released 20220202)
Annotation Version and Release Date:	GO Ontology database DOI: 10.5281/zenodo.6399963 Released 2022-03-22
Analyzed List:	Broad Up Regulated Signature Genes
Reference List:	ALCM_vLucif_limmaDEAnalysis_backgroundMin5_ensembl.txt (Mus musculus)
Test Type:	FISHER
Correction:	FDR
GO biological process complete	ALCM_vLucif_limmaDEAnalysis_backgroundMin5_ensembl.txt - REFLIST (14569)	Broad Up Regulated Signature Genes (1068)	Broad Up Regulated Signature Genes (expected)	Broad Up Regulated Signature Genes (over/under)	Broad Up Regulated Signature Genes (fold Enrichment)	Broad Up Regulated Signature Genes (raw P-value)	Broad Up Regulated Signature Genes (FDR)
regulation of attachment of spindle microtubules to kinetochore (GO:0051988)	17	8	1.25	+	6.42	0.000175	0.0243
positive regulation of chromosome segregation (GO:0051984)	25	9	1.83	+	4.91	0.000345	0.0429
chromosome condensation (GO:0030261)	25	9	1.83	+	4.91	0.000345	0.0425
sister chromatid segregation (GO:0000819)	114	33	8.36	+	3.95	8.58e-10	9.22e-07
mitotic metaphase plate congression (GO:0007080)	42	12	3.08	+	3.9	0.000228	0.0298
mitotic sister chromatid segregation (GO:0000070)	97	27	7.11	+	3.8	5.74e-08	3.32e-05
regulation of mitotic sister chromatid segregation (GO:0033047)	47	13	3.45	+	3.77	0.000166	0.0233
regulation of cell cycle checkpoint (GO:1901976)	45	12	3.3	+	3.64	0.000389	0.0468
positive regulation of histone methylation (GO:0031062)	49	13	3.59	+	3.62	0.000235	0.0304
spindle localization (GO:0051653)	53	14	3.89	+	3.6	0.000142	0.0205
metaphase plate congression (GO:0051310)	53	14	3.89	+	3.6	0.000142	0.0203
establishment of chromosome localization (GO:0051303)	69	18	5.06	+	3.56	1.93e-05	0.00419
chromosome localization (GO:0050000)	71	18	5.2	+	3.46	2.66e-05	0.00534
regulation of chromosome segregation (GO:0051983)	108	27	7.92	+	3.41	3.6e-07	0.000146
mitotic nuclear division (GO:0140014)	140	34	10.26	+	3.31	2.09e-08	1.65e-05
mitotic spindle organization (GO:0007052)	77	18	5.64	+	3.19	6.62e-05	0.0114
regulation of mitotic metaphase/anaphase transition (GO:0030071)	77	18	5.64	+	3.19	6.62e-05	0.0113
microtubule cytoskeleton organization involved in mitosis (GO:1902850)	107	25	7.84	+	3.19	2.76e-06	0.000863
regulation of chromosome separation (GO:1905818)	91	21	6.67	+	3.15	1.99e-05	0.00427
regulation of mitotic sister chromatid separation (GO:0010965)	79	18	5.79	+	3.11	8.78e-05	0.014
regulation of sister chromatid segregation (GO:0033045)	88	20	6.45	+	3.1	3.75e-05	0.00704
regulation of metaphase/anaphase transition of cell cycle (GO:1902099)	80	18	5.86	+	3.07	0.000101	0.0155
mitotic DNA damage checkpoint signaling (GO:0044773)	68	15	4.98	+	3.01	0.000447	0.0494
nuclear chromosome segregation (GO:0098813)	182	40	13.34	+	3	1.37e-08	1.14e-05
centrosome cycle (GO:0007098)	73	16	5.35	+	2.99	0.000311	0.039
mitotic cell cycle checkpoint signaling (GO:0007093)	112	24	8.21	+	2.92	1.52e-05	0.00352
cell cycle checkpoint signaling (GO:0000075)	132	27	9.68	+	2.79	9.57e-06	0.00236
regulation of G2/M transition of mitotic cell cycle (GO:0010389)	93	19	6.82	+	2.79	0.000196	0.0265
DNA damage checkpoint signaling (GO:0000077)	84	17	6.16	+	2.76	0.000458	0.0503
microtubule organizing center organization (GO:0031023)	84	17	6.16	+	2.76	0.000458	0.0499
DNA integrity checkpoint signaling (GO:0031570)	91	18	6.67	+	2.7	0.000401	0.0471
negative regulation of mitotic cell cycle phase transition (GO:1901991)	142	28	10.41	+	2.69	1.75e-05	0.00393
regulation of cell cycle G2/M phase transition (GO:1902749)	104	20	7.62	+	2.62	0.000421	0.049
nuclear division (GO:0000280)	250	48	18.33	+	2.62	3.47e-08	2.48e-05
mitotic cell cycle process (GO:1903047)	430	81	31.52	+	2.57	7.31e-13	2.75e-09
chromosome segregation (GO:0007059)	235	44	17.23	+	2.55	2.03e-07	8.73e-05
negative regulation of mitotic cell cycle (GO:0045930)	187	35	13.71	+	2.55	2.99e-06	0.000898
spindle organization (GO:0007051)	133	24	9.75	+	2.46	0.000178	0.0245
mitotic cell cycle (GO:0000278)	494	89	36.21	+	2.46	4.97e-13	3.74e-09
organelle fission (GO:0048285)	273	48	20.01	+	2.4	2.57e-07	0.000107
negative regulation of cell cycle phase transition (GO:1901988)	192	33	14.07	+	2.34	4.25e-05	0.00779
positive regulation of cell cycle process (GO:0090068)	210	36	15.39	+	2.34	1.61e-05	0.00368
regulation of chromosome organization (GO:0033044)	205	35	15.03	+	2.33	2.31e-05	0.00477
regulation of mitotic cell cycle phase transition (GO:1901990)	297	50	21.77	+	2.3	4.52e-07	0.000179
chromatin remodeling (GO:0006338)	197	32	14.44	+	2.22	0.0001	0.0155
cell cycle process (GO:0022402)	669	107	49.04	+	2.18	1.61e-12	4.84e-09
regulation of mitotic cell cycle (GO:0007346)	430	68	31.52	+	2.16	3.59e-08	2.45e-05
negative regulation of cell cycle process (GO:0010948)	228	36	16.71	+	2.15	6.42e-05	0.0112
cell division (GO:0051301)	438	69	32.11	+	2.15	3.02e-08	2.27e-05
negative regulation of cell cycle (GO:0045786)	294	46	21.55	+	2.13	9.47e-06	0.00241
positive regulation of cell cycle (GO:0045787)	288	45	21.11	+	2.13	1.29e-05	0.00302
regulation of cell cycle phase transition (GO:1901987)	377	57	27.64	+	2.06	1.67e-06	0.000546
regulation of mRNA metabolic process (GO:1903311)	250	37	18.33	+	2.02	0.0002	0.0269
chromosome organization (GO:0051276)	718	106	52.63	+	2.01	1.52e-10	2.07e-07
microtubule cytoskeleton organization (GO:0000226)	456	66	33.43	+	1.97	1.36e-06	0.000474
establishment of organelle localization (GO:0051656)	325	47	23.82	+	1.97	4.05e-05	0.00751
histone modification (GO:0016570)	333	47	24.41	+	1.93	7.49e-05	0.0125
regulation of cell cycle process (GO:0010564)	610	86	44.72	+	1.92	7.84e-08	3.93e-05
cell cycle (GO:0007049)	1006	141	73.75	+	1.91	3.45e-12	7.42e-09
regulation of cell cycle (GO:0051726)	894	124	65.54	+	1.89	1.29e-10	1.94e-07
mRNA processing (GO:0006397)	370	50	27.12	+	1.84	0.000114	0.0169
chromatin organization (GO:0006325)	449	60	32.91	+	1.82	3.32e-05	0.00649
DNA repair (GO:0006281)	400	53	29.32	+	1.81	0.000133	0.0195
regulation of DNA metabolic process (GO:0051052)	474	62	34.75	+	1.78	5.2e-05	0.00931
cellular response to DNA damage stimulus (GO:0006974)	602	78	44.13	+	1.77	5.49e-06	0.00147
microtubule-based process (GO:0007017)	670	86	49.12	+	1.75	2.65e-06	0.000847
cytoskeleton organization (GO:0007010)	977	116	71.62	+	1.62	1.46e-06	0.000487
negative regulation of transcription by RNA polymerase II (GO:0000122)	737	84	54.03	+	1.55	0.000203	0.027
negative regulation of nucleobase-containing compound metabolic process (GO:0045934)	1172	127	85.92	+	1.48	2.63e-05	0.00534
negative regulation of RNA metabolic process (GO:0051253)	1067	115	78.22	+	1.47	9.15e-05	0.0145
regulation of transcription by RNA polymerase II (GO:0006357)	1931	207	141.55	+	1.46	7.74e-08	4.01e-05
negative regulation of macromolecule biosynthetic process (GO:0010558)	1150	123	84.3	+	1.46	7.59e-05	0.0125
regulation of nucleobase-containing compound metabolic process (GO:0019219)	3014	321	220.95	+	1.45	4.48e-12	8.41e-09
negative regulation of transcription, DNA-templated (GO:0045892)	970	103	71.11	+	1.45	0.000424	0.0491
negative regulation of nucleic acid-templated transcription (GO:1903507)	974	103	71.4	+	1.44	0.000437	0.0497
negative regulation of RNA biosynthetic process (GO:1902679)	975	103	71.47	+	1.44	0.000441	0.0491
nucleic acid metabolic process (GO:0090304)	1619	171	118.68	+	1.44	3.4e-06	0.001
regulation of RNA metabolic process (GO:0051252)	2750	289	201.59	+	1.43	3.52e-10	4.07e-07
cellular response to stress (GO:0033554)	1259	132	92.29	+	1.43	9.18e-05	0.0144
negative regulation of nitrogen compound metabolic process (GO:0051172)	1835	192	134.52	+	1.43	1.36e-06	0.000465
negative regulation of cellular biosynthetic process (GO:0031327)	1200	123	87.97	+	1.4	0.000397	0.047
regulation of transcription, DNA-templated (GO:0006355)	2502	255	183.41	+	1.39	9.23e-08	4.48e-05
regulation of nucleic acid-templated transcription (GO:1903506)	2506	255	183.71	+	1.39	9.56e-08	4.49e-05
regulation of RNA biosynthetic process (GO:2001141)	2514	255	184.29	+	1.38	1.24e-07	5.67e-05
organelle organization (GO:0006996)	2762	279	202.47	+	1.38	3.7e-08	2.42e-05
negative regulation of cellular metabolic process (GO:0031324)	1955	197	143.31	+	1.37	9.47e-06	0.00237
regulation of nitrogen compound metabolic process (GO:0051171)	4290	432	314.48	+	1.37	1.56e-13	2.35e-09
negative regulation of macromolecule metabolic process (GO:0010605)	2105	211	154.31	+	1.37	5.11e-06	0.0014
regulation of macromolecule biosynthetic process (GO:0010556)	2895	289	212.22	+	1.36	5.1e-08	3.19e-05
regulation of primary metabolic process (GO:0080090)	4423	440	324.23	+	1.36	5.26e-13	2.64e-09
positive regulation of nitrogen compound metabolic process (GO:0051173)	2448	241	179.45	+	1.34	2.99e-06	0.000917
positive regulation of nucleobase-containing compound metabolic process (GO:0045935)	1551	152	113.7	+	1.34	0.000437	0.049
regulation of macromolecule metabolic process (GO:0060255)	4673	457	342.56	+	1.33	1.81e-12	4.55e-09
regulation of cellular metabolic process (GO:0031323)	4569	446	334.94	+	1.33	5.85e-12	9.78e-09
regulation of gene expression (GO:0010468)	3598	351	263.76	+	1.33	7.51e-09	6.64e-06
negative regulation of metabolic process (GO:0009892)	2298	223	168.46	+	1.32	2.3e-05	0.0048
regulation of cellular biosynthetic process (GO:0031326)	3041	294	222.92	+	1.32	6.86e-07	0.000258
positive regulation of cellular metabolic process (GO:0031325)	2629	252	192.72	+	1.31	1.17e-05	0.00283
regulation of biosynthetic process (GO:0009889)	3113	298	228.2	+	1.31	1.25e-06	0.000449
cellular localization (GO:0051641)	1938	184	142.07	+	1.3	0.000429	0.0492
positive regulation of macromolecule metabolic process (GO:0010604)	2724	256	199.69	+	1.28	3.74e-05	0.00711
regulation of metabolic process (GO:0019222)	5100	479	373.86	+	1.28	1.87e-10	2.35e-07
cellular component organization or biogenesis (GO:0071840)	4458	413	326.8	+	1.26	7.22e-08	3.88e-05
cellular component organization (GO:0016043)	4281	396	313.82	+	1.26	1.97e-07	8.69e-05
positive regulation of metabolic process (GO:0009893)	2997	272	219.7	+	1.24	0.000209	0.0275
negative regulation of cellular process (GO:0048523)	3917	347	287.14	+	1.21	0.000103	0.0156
positive regulation of cellular process (GO:0048522)	4569	402	334.94	+	1.2	2.77e-05	0.00548
negative regulation of biological process (GO:0048519)	4256	374	311.99	+	1.2	7.47e-05	0.0126
macromolecule metabolic process (GO:0043170)	4468	387	327.53	+	1.18	0.000186	0.0254
regulation of cellular process (GO:0050794)	8237	703	603.82	+	1.16	2.37e-09	2.37e-06
positive regulation of biological process (GO:0048518)	4935	421	361.77	+	1.16	0.000269	0.0343
regulation of biological process (GO:0050789)	8601	720	630.51	+	1.14	5.44e-08	3.27e-05
biological regulation (GO:0065007)	9035	750	662.32	+	1.13	6.16e-08	3.43e-05
ion transport (GO:0006811)	855	36	62.68	-	0.57	0.000361	0.0441
lipid metabolic process (GO:0006629)	909	37	66.64	-	0.56	0.000108	0.0163
carbohydrate derivative metabolic process (GO:1901135)	748	30	54.83	-	0.55	0.000437	0.0494
organonitrogen compound biosynthetic process (GO:1901566)	1052	38	77.12	-	0.49	1.06e-06	0.000389
G protein-coupled receptor signaling pathway (GO:0007186)	700	25	51.31	-	0.49	8.09e-05	0.0132
small molecule metabolic process (GO:0044281)	1210	39	88.7	-	0.44	3.81e-09	3.58e-06
cellular amide metabolic process (GO:0043603)	644	20	47.21	-	0.42	1.86e-05	0.00411
nucleobase-containing small molecule metabolic process (GO:0055086)	412	12	30.2	-	0.4	0.000393	0.0469
organic acid metabolic process (GO:0006082)	630	18	46.18	-	0.39	4.84e-06	0.00135
carboxylic acid metabolic process (GO:0019752)	606	17	44.42	-	0.38	6.75e-06	0.00175
oxoacid metabolic process (GO:0043436)	614	17	45.01	-	0.38	3.69e-06	0.00107
nucleotide metabolic process (GO:0009117)	357	9	26.17	-	0.34	0.000311	0.0392
nucleoside phosphate metabolic process (GO:0006753)	364	9	26.68	-	0.34	0.000164	0.0233
purine-containing compound metabolic process (GO:0072521)	306	7	22.43	-	0.31	0.000386	0.0468
monocarboxylic acid metabolic process (GO:0032787)	363	7	26.61	-	0.26	2.28e-05	0.00483
purine nucleotide metabolic process (GO:0006163)	286	5	20.97	-	0.24	8.71e-05	0.0141
ribose phosphate metabolic process (GO:0019693)	301	5	22.07	-	0.23	4.62e-05	0.00836
purine ribonucleotide metabolic process (GO:0009150)	274	4	20.09	-	0.2	3.62e-05	0.00698
ribonucleotide metabolic process (GO:0009259)	292	4	21.41	-	0.19	1.27e-05	0.00303
generation of precursor metabolites and energy (GO:0006091)	284	3	20.82	-	0.14	4.59e-06	0.0013
lipid catabolic process (GO:0016042)	202	2	14.81	-	0.14	0.000119	0.0176
energy derivation by oxidation of organic compounds (GO:0015980)	215	2	15.76	-	0.13	5.84e-05	0.0103
sensory perception of smell (GO:0007608)	248	2	18.18	-	0.11	6.16e-06	0.00162
sensory perception of chemical stimulus (GO:0007606)	282	2	20.67	-	0.1	6.42e-07	0.000248
cellular respiration (GO:0045333)	163	1	11.95	-	0.08	0.000239	0.0307
