# Supplementary material for: Identification of a transcriptional signature found in multiple models of ASD and related disorders
Source: HighWire-hosted journal article supplement (doi:10.1101/gr.276591.122), 2022-09-01
Supplement: Supplemental_Table_S5.xlsx [file Supplemental_Table_S5.xlsx]

## Sheet: Legend
Supplemental_Table_S5
All sheets: Raw GeneWalk (Ietswaart et al., 2021) results for genes down-regulated upon loss of one of 5 ASD-linked chromatin modifiers reported here

## Sheet: Nsd1_down
	mgi_id	hgnc_symbol	hgnc_id	go_name	go_id	go_domain	ncon_gene	ncon_go	global_padj	gene_padj	pval	sim	sem_sim	cilow_global_padj	ciupp_global_padj	cilow_gene_padj	ciupp_gene_padj	cilow_pval	ciupp_pval
0	2385067	LIMS2	16084	cell-cell junction	GO:0005911	cellular component	11	25	0.0639	0.0401	0.0122	0.881	0.0114	0.0632	0.0646	0.0269	0.0599	0.00963	0.0153
1	2385067	LIMS2	16084	focal adhesion	GO:0005925	cellular component	11	30	0.0639	0.0431	0.0192	0.825	0.000846	0.0632	0.0646	0.0333	0.0559	0.0188	0.0195
2	2385067	LIMS2	16084	cell-cell adhesion	GO:0098609	biological process	11	28	0.0657	0.0401	0.0195	0.825	0.027	0.0631	0.0684	0.0269	0.0599	0.0115	0.0331
3	2385067	LIMS2	16084	positive regulation of integrin-mediated signaling pathway	GO:2001046	biological process	11	4	0.0706	0.0487	0.0303	0.773	0.0146	0.0638	0.0781	0.0472	0.0502	0.0222	0.0414
4	2385067	LIMS2	16084	cell-cell junction organization	GO:0045216	biological process	11	10	0.0757	0.0456	0.0265	0.79	0.0481	0.0636	0.09	0.0262	0.0793	0.00998	0.0705
5	2385067	LIMS2	16084	positive regulation of substrate adhesion-dependent cell spreading	GO:1900026	biological process	11	8	0.0859	0.0569	0.0459	0.722	0.0294	0.0645	0.114	0.0353	0.0917	0.0259	0.0811
6	2385067	LIMS2	16084	cytoplasm	GO:0005737	cellular component	11	202	0.199	0.177	0.177	0.525	0.0141	0.172	0.231	0.147	0.214	0.147	0.214
7	2136018	WNT16	16267	cytokine activity	GO:0005125	molecular function	28	7	0.0639	0.0543	0.0075	0.929	0.00266	0.0632	0.0646	0.0415	0.071	0.00685	0.00822
8	2136018	WNT16	16267	positive regulation of phosphatidylinositol 3-kinase signaling	GO:0014068	biological process	28	8	0.0639	0.0543	0.0096	0.908	0.00783	0.0632	0.0646	0.0415	0.071	0.00798	0.0115
9	2136018	WNT16	16267	canonical Wnt signaling pathway	GO:0060070	biological process	28	27	0.0642	0.0566	0.0191	0.825	0.00798	0.0641	0.0643	0.0444	0.0722	0.0161	0.0226
10	2136018	WNT16	16267	frizzled binding	GO:0005109	molecular function	28	3	0.0643	0.0543	0.0179	0.834	0.0179	0.0642	0.0644	0.0415	0.071	0.0126	0.0253
11	2136018	WNT16	16267	replicative senescence	GO:0090399	biological process	28	2	0.066	0.0545	0.0193	0.826	0.0281	0.0624	0.0697	0.0413	0.0717	0.0111	0.0336
12	2136018	WNT16	16267	keratinocyte differentiation	GO:0030216	biological process	28	6	0.0703	0.0607	0.0294	0.776	0.015	0.0621	0.0797	0.0459	0.0804	0.0214	0.0405
13	2136018	WNT16	16267	keratinocyte proliferation	GO:0043616	biological process	28	2	0.0715	0.0624	0.0309	0.77	0.0208	0.0608	0.084	0.047	0.0829	0.02	0.0477
14	2136018	WNT16	16267	extracellular space	GO:0005615	cellular component	28	54	0.0757	0.0692	0.0367	0.752	0.00505	0.0726	0.0789	0.0664	0.0721	0.0331	0.0407
15	2136018	WNT16	16267	positive regulation of JNK cascade	GO:0046330	biological process	28	7	0.0847	0.0701	0.0432	0.729	0.0348	0.0637	0.113	0.0464	0.106	0.0213	0.0874
16	2136018	WNT16	16267	neuron differentiation	GO:0030182	biological process	28	24	0.0849	0.0736	0.0462	0.723	0.0188	0.0704	0.102	0.0674	0.0803	0.0316	0.0676
17	2136018	WNT16	16267	oxidative stress-induced premature senescence	GO:0090403	biological process	28	2	0.0873	0.0742	0.0499	0.715	0.00943	0.0784	0.0972	0.0691	0.0797	0.0415	0.06
18	2136018	WNT16	16267	positive regulation of gene expression	GO:0010628	biological process	28	30	0.113	0.0934	0.0782	0.654	0.0193	0.093	0.137	0.0681	0.128	0.0566	0.108
19	2136018	WNT16	16267	negative regulation of cell death	GO:0060548	biological process	28	10	0.132	0.109	0.0988	0.619	0.0265	0.0998	0.174	0.0728	0.162	0.0653	0.149
20	2136018	WNT16	16267	cytoplasm	GO:0005737	cellular component	28	202	0.152	0.133	0.124	0.586	0.00863	0.139	0.166	0.119	0.149	0.109	0.141
21	2136018	WNT16	16267	cell fate commitment	GO:0045165	biological process	28	40	0.172	0.149	0.14	0.557	0.0576	0.0949	0.313	0.0726	0.306	0.0604	0.322
22	103017	FCGRT	3621	beta-2-microglobulin binding	GO:0030881	molecular function	11	2	0.0639	0.0228	0.00472	0.95	0.00652	0.0632	0.0646	0.0147	0.0352	0.00308	0.00725
23	103017	FCGRT	3621	external side of plasma membrane	GO:0009897	cellular component	11	10	0.0639	0.0254	0.0104	0.89	0.0219	0.0632	0.0646	0.0168	0.0383	0.00579	0.0187
24	103017	FCGRT	3621	IgG binding	GO:0019864	molecular function	11	2	0.0639	0.0284	0.0126	0.877	0.0187	0.0632	0.0646	0.0227	0.0355	0.00874	0.0181
25	103017	FCGRT	3621	extracellular space	GO:0005615	cellular component	11	54	0.0695	0.0402	0.0268	0.787	0.0208	0.0614	0.0787	0.0258	0.0626	0.0172	0.0417
26	103017	FCGRT	3621	immune response	GO:0006955	biological process	11	14	0.0832	0.0484	0.0446	0.727	0.0201	0.0688	0.101	0.0359	0.0652	0.0298	0.0667
27	103017	FCGRT	3621	protein binding	GO:0005515	molecular function	11	831	0.0866	0.0526	0.0495	0.716	0.00052	0.086	0.0872	0.0468	0.0591	0.049	0.0499
28	1351326	NRK	25391	MAPK cascade	GO:0000165	biological process	9	10	0.0639	0.0328	0.00818	0.922	0.00537	0.0632	0.0646	0.0251	0.0429	0.00689	0.00971
29	1351326	NRK	25391	stress-activated protein kinase signaling cascade	GO:0031098	biological process	9	4	0.0639	0.0328	0.0173	0.838	0.0118	0.0632	0.0646	0.0251	0.0429	0.0138	0.0216
30	1351326	NRK	25391	actin cytoskeleton reorganization	GO:0031532	biological process	9	3	0.0639	0.0328	0.0177	0.834	0.00496	0.0632	0.0646	0.0251	0.0429	0.016	0.0195
31	1351326	NRK	25391	activation of protein kinase activity	GO:0032147	biological process	9	15	0.0642	0.0328	0.0194	0.824	0.0103	0.0641	0.0643	0.0251	0.0429	0.0157	0.0239
32	1351326	NRK	25391	protein serine/threonine kinase activity	GO:0004674	molecular function	9	43	0.0671	0.034	0.0216	0.813	0.0266	0.0638	0.0707	0.025	0.0464	0.0127	0.0369
33	1351326	NRK	25391	cytoplasm	GO:0005737	cellular component	9	202	0.18	0.162	0.155	0.548	0.0116	0.159	0.203	0.145	0.179	0.133	0.182
34	1351326	NRK	25391	neuron projection morphogenesis	GO:0048812	biological process	9	8	0.185	0.162	0.162	0.542	0.00787	0.17	0.201	0.145	0.179	0.145	0.179
35	2685565	NUP62CL	25960	RNA export from nucleus	GO:0006405	biological process	6	7	0.119	0.215	0.0824	0.643	0.0414	0.077	0.184	0.169	0.272	0.0401	0.169
36	2685565	NUP62CL	25960	phospholipid binding	GO:0005543	molecular function	6	17	0.125	0.215	0.0922	0.631	0.0106	0.111	0.139	0.169	0.272	0.0774	0.11
37	2685565	NUP62CL	25960	protein import into nucleus	GO:0006606	biological process	6	10	0.125	0.215	0.0919	0.632	0.0153	0.105	0.148	0.169	0.272	0.0714	0.118
38	2685565	NUP62CL	25960	structural constituent of nuclear pore	GO:0017056	molecular function	6	2	0.194	0.257	0.171	0.53	0.0203	0.157	0.239	0.196	0.337	0.13	0.224
39	2685565	NUP62CL	25960	protein binding	GO:0005515	molecular function	6	831	0.415	0.436	0.41	0.342	3.95e-05	0.414	0.415	0.386	0.491	0.41	0.41
40	2685565	NUP62CL	25960	nuclear pore central transport channel	GO:0044613	cellular component	6	2	0.448	0.474	0.442	0.314	0.0441	0.318	0.631	0.357	0.629	0.311	0.629
41	2387586	TNS2	19737	kinase binding	GO:0019900	molecular function	25	11	0.0639	0.0233	0.00752	0.92	0.0196	0.0632	0.0646	0.022	0.0247	0.00434	0.013
42	2387586	TNS2	19737	peptidyl-tyrosine dephosphorylation	GO:0035335	biological process	25	5	0.0639	0.0233	0.0101	0.902	0.011	0.0632	0.0646	0.022	0.0247	0.00793	0.0128
43	2387586	TNS2	19737	protein tyrosine phosphatase activity	GO:0004725	molecular function	25	13	0.0639	0.0233	0.0129	0.875	0.00884	0.0632	0.0646	0.022	0.0247	0.011	0.0151
44	2387586	TNS2	19737	negative regulation of cell population proliferation	GO:0008285	biological process	25	45	0.0639	0.0233	0.014	0.863	0.0109	0.0632	0.0646	0.022	0.0247	0.0115	0.0171
45	2387586	TNS2	19737	focal adhesion	GO:0005925	cellular component	25	30	0.0639	0.0233	0.0162	0.844	0.00292	0.0632	0.0646	0.022	0.0247	0.0154	0.0171
46	2387586	TNS2	19737	negative regulation of insulin receptor signaling pathway	GO:0046627	biological process	25	7	0.0639	0.0238	0.0132	0.872	0.0209	0.0632	0.0646	0.0215	0.0264	0.00884	0.0197
47	2387586	TNS2	19737	identical protein binding	GO:0042802	molecular function	25	79	0.0697	0.034	0.0298	0.775	0.00519	0.0672	0.0724	0.0305	0.0379	0.0267	0.0332
48	2387586	TNS2	19737	protein binding	GO:0005515	molecular function	25	831	0.0782	0.0399	0.0399	0.742	0.00395	0.0758	0.0807	0.0369	0.0431	0.0369	0.0431
49	1919598	AIF1L	28904	actin filament binding	GO:0051015	molecular function	9	16	0.0655	0.069	0.0236	0.801	0.00643	0.0634	0.0677	0.0516	0.0923	0.0205	0.0271
50	1919598	AIF1L	28904	ruffle membrane	GO:0032587	cellular component	9	7	0.0682	0.069	0.0279	0.782	0.00291	0.0675	0.069	0.0516	0.0923	0.0262	0.0297
51	1919598	AIF1L	28904	actin cytoskeleton	GO:0015629	cellular component	9	18	0.0696	0.069	0.026	0.791	0.0216	0.0643	0.0755	0.0516	0.0923	0.0165	0.0412
52	1919598	AIF1L	28904	focal adhesion	GO:0005925	cellular component	9	30	0.0727	0.069	0.033	0.764	0.011	0.0668	0.0792	0.0516	0.0923	0.0262	0.0415
53	1919598	AIF1L	28904	actin filament bundle assembly	GO:0051017	biological process	9	10	0.0845	0.0697	0.0459	0.724	0.0171	0.0715	0.0998	0.0512	0.0949	0.0328	0.0641
54	1919598	AIF1L	28904	ruffle assembly	GO:0097178	biological process	9	3	0.0852	0.0697	0.0471	0.721	0.013	0.0747	0.0971	0.0512	0.0949	0.0365	0.0609
55	1919598	AIF1L	28904	actin filament	GO:0005884	cellular component	9	6	0.106	0.0847	0.0699	0.669	0.0274	0.0798	0.142	0.0585	0.123	0.0433	0.113
56	1919598	AIF1L	28904	calcium ion binding	GO:0005509	molecular function	9	19	0.108	0.086	0.0725	0.664	0.0231	0.0844	0.139	0.0604	0.123	0.0487	0.108
57	1919598	AIF1L	28904	extracellular exosome	GO:0070062	cellular component	9	162	0.138	0.108	0.108	0.608	0.0164	0.115	0.165	0.0835	0.139	0.0835	0.139
58	98476	TAC3	11521	positive regulation of blood pressure	GO:0045777	biological process	10	5	0.0639	0.0373	0.0186	0.828	0.00557	0.0632	0.0646	0.0332	0.0419	0.0166	0.0209
59	98476	TAC3	11521	protein binding	GO:0005515	molecular function	10	831	0.0873	0.0501	0.0501	0.714	0.00286	0.0853	0.0893	0.0474	0.053	0.0474	0.053
60	1916207	PAQR6	30132	signaling receptor activity	GO:0038023	molecular function	4	35	0.0639	0.0247	0.0123	0.88	0.0092	0.0632	0.0646	0.0206	0.0296	0.0103	0.0148
61	1916207	PAQR6	30132	protein binding	GO:0005515	molecular function	4	831	0.12	0.0864	0.0864	0.641	0.00535	0.113	0.126	0.0789	0.0946	0.0789	0.0946
62	1919143	NOXO1	19404	enzyme binding	GO:0019899	molecular function	8	49	0.0738	0.194	0.0349	0.757	0.00745	0.0701	0.0778	0.111	0.338	0.0298	0.0408
63	1919143	NOXO1	19404	superoxide metabolic process	GO:0006801	biological process	8	5	0.108	0.215	0.0714	0.665	0.0322	0.0766	0.152	0.111	0.416	0.0402	0.127
64	1919143	NOXO1	19404	extracellular matrix disassembly	GO:0022617	biological process	8	8	0.108	0.215	0.0653	0.671	0.0534	0.0657	0.179	0.111	0.416	0.0238	0.179
65	1919143	NOXO1	19404	molecular adaptor activity	GO:0060090	molecular function	8	12	0.223	0.316	0.204	0.498	0.0215	0.18	0.278	0.297	0.337	0.157	0.266
66	1919143	NOXO1	19404	superoxide-generating NADPH oxidase activator activity	GO:0016176	molecular function	8	3	0.26	0.328	0.244	0.461	0.0293	0.195	0.346	0.304	0.354	0.176	0.338
67	1919143	NOXO1	19404	cytoplasm	GO:0005737	cellular component	8	202	0.291	0.323	0.279	0.434	0.0176	0.245	0.346	0.291	0.357	0.229	0.339
68	1919143	NOXO1	19404	protein binding	GO:0005515	molecular function	8	831	0.304	0.323	0.294	0.423	0.00787	0.282	0.329	0.291	0.357	0.27	0.319
69	1919143	NOXO1	19404	NADPH oxidase complex	GO:0043020	cellular component	8	3	0.305	0.324	0.293	0.422	0.0209	0.25	0.371	0.29	0.361	0.236	0.365
70	1347356	ADAMTS2	218	metalloendopeptidase activity	GO:0004222	molecular function	5	9	0.0658	0.0318	0.0197	0.823	0.0229	0.0618	0.07	0.0106	0.095	0.0124	0.0313
71	1347356	ADAMTS2	218	extracellular matrix organization	GO:0030198	biological process	5	17	0.0775	0.0341	0.0292	0.776	0.0512	0.0554	0.108	0.01	0.116	0.0107	0.0803
72	1347356	ADAMTS2	218	extracellular matrix	GO:0031012	cellular component	5	21	0.0867	0.0364	0.0255	0.787	0.0874	0.0474	0.158	0.00947	0.14	0.00497	0.13
73	1306803	LHX6	21735	RNA polymerase II transcription regulatory region sequence-specific DNA binding	GO:0000977	molecular function	11	14	0.0639	0.0288	0.015	0.855	0.00437	0.0632	0.0646	0.0258	0.0322	0.0138	0.0162
74	1306803	LHX6	21735	DNA-binding transcription factor activity, RNA polymerase II-specific	GO:0000981	molecular function	11	47	0.0639	0.0288	0.0152	0.854	0.00942	0.0632	0.0646	0.0258	0.0322	0.0127	0.0181
75	1306803	LHX6	21735	sequence-specific double-stranded DNA binding	GO:1990837	molecular function	11	31	0.0639	0.0288	0.0153	0.852	0.00675	0.0632	0.0646	0.0258	0.0322	0.0136	0.0173
76	1306803	LHX6	21735	neuron differentiation	GO:0030182	biological process	11	24	0.0639	0.0288	0.0162	0.846	0.0058	0.0632	0.0646	0.0258	0.0322	0.0145	0.0181
77	1306803	LHX6	21735	regulation of transcription by RNA polymerase II	GO:0006357	biological process	11	76	0.0639	0.0288	0.0174	0.836	0.00627	0.0632	0.0646	0.0258	0.0322	0.0153	0.0198
78	1306803	LHX6	21735	forebrain neuron development	GO:0021884	biological process	11	5	0.0707	0.0408	0.0306	0.772	0.00747	0.0666	0.075	0.0348	0.048	0.0261	0.036
79	1306803	LHX6	21735	nucleus	GO:0005634	cellular component	11	200	0.0904	0.0575	0.0536	0.706	0.00451	0.087	0.094	0.0518	0.0639	0.0492	0.0585
80	1306803	LHX6	21735	protein binding	GO:0005515	molecular function	11	831	0.0942	0.0575	0.0575	0.697	0.00562	0.0898	0.0987	0.0518	0.0639	0.0518	0.0639
81	1100883	CELSR1	1850	cell-cell adhesion	GO:0098609	biological process	4	28	0.0828	0.116	0.0388	0.742	0.0379	0.0634	0.108	0.0536	0.252	0.0179	0.084
82	1100883	CELSR1	1850	plasma membrane	GO:0005886	cellular component	4	175	0.174	0.224	0.149	0.555	0.0179	0.145	0.21	0.173	0.288	0.116	0.192
83	1100883	CELSR1	1850	nucleoplasm	GO:0005654	cellular component	4	161	0.364	0.357	0.357	0.377	0.0139	0.321	0.413	0.312	0.408	0.312	0.408
84	1889206	SKAP2	15687	plasma membrane	GO:0005886	cellular component	6	175	0.104	0.118	0.0687	0.673	0.00776	0.0968	0.112	0.109	0.128	0.06	0.0785
85	1889206	SKAP2	15687	protein binding	GO:0005515	molecular function	6	831	0.117	0.118	0.0832	0.646	0.00998	0.106	0.129	0.109	0.128	0.0702	0.0985
86	1889206	SKAP2	15687	cytosol	GO:0005829	cellular component	6	164	0.141	0.118	0.111	0.603	0.00804	0.13	0.152	0.109	0.128	0.0983	0.126
87	1889206	SKAP2	15687	cytoplasm	GO:0005737	cellular component	6	202	0.143	0.118	0.114	0.6	0.00733	0.133	0.154	0.109	0.128	0.102	0.127
88	1889206	SKAP2	15687	nucleoplasm	GO:0005654	cellular component	6	161	0.143	0.118	0.114	0.6	0.00714	0.134	0.153	0.109	0.128	0.102	0.127
89	107555	SEMA5B	10737	positive regulation of cell migration	GO:0030335	biological process	10	37	0.0639	0.0859	0.0144	0.86	0.00727	0.0632	0.0646	0.0624	0.118	0.0126	0.0164
90	107555	SEMA5B	10737	integral component of membrane	GO:0016021	cellular component	10	33	0.0727	0.0859	0.0329	0.764	0.0111	0.0662	0.0799	0.0624	0.118	0.026	0.0415
91	107555	SEMA5B	10737	semaphorin receptor binding	GO:0030215	molecular function	10	5	0.0785	0.0859	0.0394	0.742	0.0177	0.0677	0.0909	0.0624	0.118	0.0273	0.0568
92	107555	SEMA5B	10737	chemorepellent activity	GO:0045499	molecular function	10	5	0.0794	0.0859	0.0408	0.739	0.0116	0.072	0.0875	0.0624	0.118	0.0322	0.0518
93	107555	SEMA5B	10737	negative regulation of axon extension involved in axon guidance	GO:0048843	biological process	10	7	0.0808	0.0868	0.0409	0.737	0.0246	0.064	0.102	0.0619	0.122	0.0251	0.0665
94	107555	SEMA5B	10737	semaphorin-plexin signaling pathway	GO:0071526	biological process	10	10	0.126	0.113	0.0938	0.628	0.0172	0.105	0.153	0.0849	0.15	0.0711	0.124
95	107555	SEMA5B	10737	axon extension	GO:0048675	biological process	10	5	0.131	0.118	0.0983	0.62	0.0251	0.101	0.171	0.0904	0.153	0.0664	0.145
96	107555	SEMA5B	10737	axon guidance	GO:0007411	biological process	10	36	0.133	0.113	0.0986	0.617	0.0422	0.0849	0.209	0.0706	0.18	0.0511	0.19
97	107555	SEMA5B	10737	neural crest cell migration	GO:0001755	biological process	10	9	0.137	0.12	0.105	0.611	0.0187	0.112	0.166	0.091	0.158	0.0781	0.142
98	97531	PDGFRB	8804	vascular endothelial growth factor binding	GO:0038085	molecular function	76	2	0.0639	0.0282	0.00597	0.94	0.00682	0.0632	0.0646	0.0278	0.0287	0.00431	0.00826
99	97531	PDGFRB	8804	platelet-derived growth factor binding	GO:0048407	molecular function	76	2	0.0639	0.0282	0.00616	0.938	0.00759	0.0632	0.0646	0.0278	0.0287	0.00433	0.00877
100	97531	PDGFRB	8804	platelet-derived growth factor receptor binding	GO:0005161	molecular function	76	2	0.0639	0.0282	0.00654	0.937	0.00277	0.0632	0.0646	0.0278	0.0287	0.00567	0.00754
101	97531	PDGFRB	8804	positive regulation of cell proliferation by VEGF-activated platelet derived growth factor receptor signaling pathway	GO:0038091	biological process	76	3	0.0639	0.0282	0.00669	0.935	0.00598	0.0632	0.0646	0.0278	0.0287	0.0052	0.00861
102	97531	PDGFRB	8804	positive regulation of phospholipase C activity	GO:0010863	biological process	76	5	0.0639	0.0282	0.00738	0.93	0.00252	0.0632	0.0646	0.0278	0.0287	0.00666	0.00818
103	97531	PDGFRB	8804	platelet-derived growth factor receptor signaling pathway	GO:0048008	biological process	76	5	0.0639	0.0282	0.00812	0.924	0.00208	0.0632	0.0646	0.0278	0.0287	0.00763	0.00864
104	97531	PDGFRB	8804	platelet-derived growth factor receptor-beta signaling pathway	GO:0035791	biological process	76	4	0.0639	0.0282	0.00911	0.914	0.00146	0.0632	0.0646	0.0278	0.0287	0.00878	0.00946
105	97531	PDGFRB	8804	positive regulation of cell migration	GO:0030335	biological process	76	37	0.0639	0.0282	0.00875	0.914	0.0134	0.0632	0.0646	0.0278	0.0287	0.00607	0.0126
106	97531	PDGFRB	8804	positive regulation of smooth muscle cell migration	GO:0014911	biological process	76	5	0.0639	0.0282	0.00938	0.911	0.00106	0.0632	0.0646	0.0278	0.0287	0.00915	0.00961
107	97531	PDGFRB	8804	platelet-derived growth factor beta-receptor activity	GO:0005019	molecular function	76	2	0.0639	0.0282	0.00966	0.908	0.00429	0.0632	0.0646	0.0278	0.0287	0.00873	0.0107
108	97531	PDGFRB	8804	signaling receptor binding	GO:0005102	molecular function	76	73	0.0639	0.0282	0.00966	0.906	0.0105	0.0632	0.0646	0.0278	0.0287	0.00731	0.0128
109	97531	PDGFRB	8804	transmembrane receptor protein tyrosine kinase signaling pathway	GO:0007169	biological process	76	27	0.0639	0.0282	0.00979	0.904	0.0137	0.0632	0.0646	0.0278	0.0287	0.00718	0.0133
110	97531	PDGFRB	8804	protein tyrosine kinase activity	GO:0004713	molecular function	76	8	0.0639	0.0282	0.0106	0.898	0.00102	0.0632	0.0646	0.0278	0.0287	0.0104	0.0109
111	97531	PDGFRB	8804	growth factor binding	GO:0019838	molecular function	76	22	0.0639	0.0286	0.0127	0.876	0.0165	0.0632	0.0646	0.0277	0.0295	0.00935	0.0173
112	97531	PDGFRB	8804	receptor complex	GO:0043235	cellular component	76	34	0.0639	0.0286	0.013	0.873	0.0187	0.0632	0.0646	0.0277	0.0295	0.009	0.0187
113	97531	PDGFRB	8804	positive regulation of smooth muscle cell proliferation	GO:0048661	biological process	76	5	0.0639	0.0287	0.0115	0.889	0.00522	0.0632	0.0646	0.0282	0.0291	0.0103	0.0129
114	97531	PDGFRB	8804	intrinsic component of plasma membrane	GO:0031226	cellular component	76	10	0.0639	0.0289	0.0132	0.872	0.00434	0.0632	0.0646	0.0285	0.0294	0.0121	0.0143
115	97531	PDGFRB	8804	positive regulation of ERK1 and ERK2 cascade	GO:0070374	biological process	76	15	0.0639	0.0307	0.0145	0.861	0.015	0.0632	0.0646	0.0265	0.0355	0.0109	0.0193
116	97531	PDGFRB	8804	transmembrane receptor protein tyrosine kinase activity	GO:0004714	molecular function	76	23	0.0639	0.0308	0.0141	0.863	0.0155	0.0632	0.0646	0.0275	0.0344	0.0106	0.0188
117	97531	PDGFRB	8804	peptidyl-tyrosine phosphorylation	GO:0018108	biological process	76	10	0.0639	0.0312	0.0149	0.855	0.00974	0.0632	0.0646	0.0285	0.0341	0.0125	0.0178
118	97531	PDGFRB	8804	protein autophosphorylation	GO:0046777	biological process	76	15	0.0644	0.0336	0.0192	0.825	0.0122	0.0638	0.0651	0.0293	0.0386	0.0151	0.0245
119	97531	PDGFRB	8804	integral component of plasma membrane	GO:0005887	cellular component	76	76	0.0648	0.0351	0.0226	0.805	0.00477	0.0636	0.0661	0.032	0.0385	0.0204	0.0251
120	97531	PDGFRB	8804	focal adhesion	GO:0005925	cellular component	76	30	0.0659	0.0344	0.0215	0.812	0.0187	0.0616	0.0706	0.0319	0.037	0.0145	0.032
121	97531	PDGFRB	8804	phosphatidylinositol-mediated signaling	GO:0048015	biological process	76	6	0.0674	0.0359	0.0219	0.811	0.0256	0.0635	0.0716	0.0283	0.0457	0.013	0.0369
122	97531	PDGFRB	8804	intracellular membrane-bounded organelle	GO:0043231	cellular component	76	80	0.0689	0.039	0.0279	0.782	0.0162	0.0616	0.0771	0.0344	0.0441	0.0197	0.0394
123	97531	PDGFRB	8804	positive regulation of phosphatidylinositol 3-kinase activity	GO:0043552	biological process	76	5	0.0699	0.0376	0.0243	0.797	0.0283	0.0593	0.0824	0.0268	0.0528	0.0134	0.0442
124	97531	PDGFRB	8804	cell migration	GO:0016477	biological process	76	50	0.071	0.0412	0.0312	0.77	0.00594	0.0675	0.0747	0.0368	0.0461	0.0274	0.0355
125	97531	PDGFRB	8804	enzyme binding	GO:0019899	molecular function	76	49	0.0711	0.041	0.0312	0.77	0.00701	0.067	0.0755	0.0354	0.0476	0.0267	0.0363
126	97531	PDGFRB	8804	Golgi apparatus	GO:0005794	cellular component	76	55	0.0715	0.0412	0.0321	0.767	0.00273	0.0692	0.0738	0.0368	0.0461	0.0302	0.0341
127	97531	PDGFRB	8804	multicellular organism development	GO:0007275	biological process	76	17	0.0717	0.0386	0.0285	0.78	0.0235	0.063	0.0816	0.0295	0.0504	0.0173	0.0469
128	97531	PDGFRB	8804	cell chemotaxis	GO:0060326	biological process	76	22	0.0745	0.0429	0.0353	0.756	0.00572	0.0701	0.0791	0.0364	0.0506	0.0313	0.0399
129	97531	PDGFRB	8804	positive regulation of phosphoprotein phosphatase activity	GO:0032516	biological process	76	7	0.0754	0.0435	0.036	0.753	0.0103	0.0686	0.0827	0.0364	0.0521	0.0289	0.0447
130	97531	PDGFRB	8804	positive regulation of cell population proliferation	GO:0008284	biological process	76	46	0.0759	0.0438	0.0351	0.755	0.0235	0.0638	0.0904	0.035	0.0548	0.0215	0.0575
131	97531	PDGFRB	8804	positive regulation of kinase activity	GO:0033674	biological process	76	17	0.0792	0.0471	0.0394	0.742	0.0209	0.065	0.0964	0.034	0.0652	0.0258	0.06
132	97531	PDGFRB	8804	signal transduction	GO:0007165	biological process	76	62	0.0816	0.0487	0.0401	0.737	0.0362	0.0577	0.115	0.0293	0.0809	0.0199	0.0807
133	97531	PDGFRB	8804	protein kinase binding	GO:0019901	molecular function	76	38	0.0836	0.0504	0.0455	0.726	0.0137	0.0729	0.0959	0.0396	0.0642	0.0348	0.0594
134	97531	PDGFRB	8804	phosphatidylinositol metabolic process	GO:0046488	biological process	76	12	0.092	0.0589	0.0531	0.704	0.0307	0.0676	0.125	0.0352	0.0985	0.0297	0.0949
135	97531	PDGFRB	8804	protein binding	GO:0005515	molecular function	76	831	0.106	0.0741	0.071	0.669	0.00614	0.1	0.112	0.0678	0.0811	0.0638	0.0789
136	97531	PDGFRB	8804	membrane	GO:0016020	cellular component	76	157	0.123	0.0912	0.0905	0.634	0.00758	0.115	0.133	0.0815	0.102	0.0797	0.103
137	1858193	FOLH1	3788	metallocarboxypeptidase activity	GO:0004181	molecular function	13	7	0.0639	0.047	0.0143	0.861	0.0064	0.0632	0.0646	0.04	0.0552	0.0127	0.0161
138	1858193	FOLH1	3788	proteolysis	GO:0006508	biological process	13	19	0.0639	0.047	0.0146	0.859	0.0149	0.0632	0.0646	0.04	0.0552	0.011	0.0192
139	1858193	FOLH1	3788	carboxypeptidase activity	GO:0004180	molecular function	13	5	0.0639	0.047	0.0146	0.859	0.0107	0.0632	0.0646	0.04	0.0552	0.012	0.0178
140	1858193	FOLH1	3788	Ac-Asp-Glu binding	GO:1904492	molecular function	13	3	0.102	0.129	0.0658	0.679	0.0103	0.0915	0.113	0.0949	0.176	0.0548	0.079
141	1858193	FOLH1	3788	tetrahydrofolyl-poly(glutamate) polymer binding	GO:1904493	molecular function	13	2	0.128	0.145	0.0948	0.626	0.024	0.0995	0.164	0.0923	0.227	0.0635	0.142
142	1858193	FOLH1	3788	C-terminal protein deglutamylation	GO:0035609	biological process	13	3	0.143	0.149	0.109	0.6	0.0464	0.0886	0.232	0.0909	0.243	0.0538	0.222
143	1858193	FOLH1	3788	extracellular exosome	GO:0070062	cellular component	13	162	0.157	0.162	0.13	0.579	0.00721	0.147	0.168	0.124	0.212	0.117	0.144
144	1858193	FOLH1	3788	plasma membrane	GO:0005886	cellular component	13	175	0.171	0.166	0.145	0.559	0.02	0.139	0.21	0.122	0.226	0.11	0.192
145	1858193	FOLH1	3788	cell surface	GO:0009986	cellular component	13	30	0.192	0.169	0.169	0.533	0.0222	0.153	0.242	0.126	0.226	0.126	0.226
146	98961	WNT7A	12786	cytokine activity	GO:0005125	molecular function	46	7	0.0639	0.0611	0.00568	0.939	0.0109	0.0632	0.0646	0.0427	0.0875	0.00333	0.0097
147	98961	WNT7A	12786	receptor ligand activity	GO:0048018	molecular function	46	12	0.0639	0.0611	0.00613	0.939	0.00601	0.0632	0.0646	0.0427	0.0875	0.00463	0.00813
148	98961	WNT7A	12786	signaling receptor binding	GO:0005102	molecular function	46	73	0.0639	0.0611	0.00712	0.917	0.0235	0.0632	0.0646	0.0427	0.0875	0.003	0.0169
149	98961	WNT7A	12786	positive regulation of epithelial cell proliferation involved in wound healing	GO:0060054	biological process	46	2	0.0639	0.0611	0.0131	0.873	0.00834	0.0632	0.0646	0.0427	0.0875	0.0112	0.0153
150	98961	WNT7A	12786	frizzled binding	GO:0005109	molecular function	46	3	0.0639	0.0611	0.0173	0.837	0.0071	0.0632	0.0646	0.0427	0.0875	0.0151	0.0199
151	98961	WNT7A	12786	canonical Wnt signaling pathway	GO:0060070	biological process	46	27	0.0639	0.0615	0.0182	0.831	0.00525	0.0632	0.0646	0.0433	0.0872	0.0163	0.0203
152	98961	WNT7A	12786	negative regulation of neurogenesis	GO:0050768	biological process	46	10	0.0647	0.0611	0.0174	0.838	0.0189	0.0627	0.0669	0.0427	0.0875	0.0119	0.0254
153	98961	WNT7A	12786	glutamatergic synapse	GO:0098978	cellular component	46	9	0.0652	0.0668	0.0226	0.806	0.00912	0.0632	0.0672	0.0522	0.0855	0.0187	0.0275
154	98961	WNT7A	12786	positive regulation of excitatory synapse assembly	GO:1904891	biological process	46	3	0.0654	0.0611	0.0193	0.825	0.0231	0.0622	0.0689	0.0427	0.0875	0.0122	0.0305
155	98961	WNT7A	12786	wound healing, spreading of epidermal cells	GO:0035313	biological process	46	2	0.0669	0.0611	0.0198	0.823	0.0261	0.0608	0.0735	0.0427	0.0875	0.0115	0.034
156	98961	WNT7A	12786	embryonic axis specification	GO:0000578	biological process	46	9	0.0708	0.0619	0.0256	0.793	0.0303	0.0617	0.0814	0.0434	0.0884	0.0138	0.0477
157	98961	WNT7A	12786	positive regulation of synapse assembly	GO:0051965	biological process	46	7	0.0717	0.0619	0.0276	0.784	0.0259	0.0637	0.0807	0.0434	0.0884	0.016	0.0475
158	98961	WNT7A	12786	chondrocyte differentiation	GO:0002062	biological process	46	4	0.0719	0.0619	0.0257	0.792	0.0363	0.0595	0.0869	0.0433	0.0884	0.0123	0.0539
159	98961	WNT7A	12786	embryonic digit morphogenesis	GO:0042733	biological process	46	2	0.074	0.0668	0.0335	0.761	0.0228	0.0609	0.0899	0.0522	0.0855	0.0208	0.0538
160	98961	WNT7A	12786	Wnt signaling pathway, planar cell polarity pathway	GO:0060071	biological process	46	11	0.0745	0.0648	0.0259	0.789	0.0448	0.0548	0.101	0.0406	0.103	0.0104	0.0646
161	98961	WNT7A	12786	embryonic forelimb morphogenesis	GO:0035115	biological process	46	3	0.079	0.0699	0.0406	0.74	0.00374	0.0757	0.0825	0.0567	0.0862	0.0378	0.0436
162	98961	WNT7A	12786	positive regulation of excitatory postsynaptic potential	GO:2000463	biological process	46	4	0.0794	0.0751	0.0395	0.741	0.0261	0.0627	0.101	0.0605	0.0932	0.0236	0.0662
163	98961	WNT7A	12786	embryonic hindlimb morphogenesis	GO:0035116	biological process	46	3	0.0802	0.0699	0.0418	0.736	0.0078	0.0743	0.0866	0.0567	0.0862	0.0358	0.0488
164	98961	WNT7A	12786	extracellular space	GO:0005615	cellular component	46	54	0.0804	0.0712	0.0423	0.735	0.00582	0.0762	0.0849	0.0591	0.0858	0.0377	0.0475
165	98961	WNT7A	12786	positive regulation of cellular protein metabolic process	GO:0032270	biological process	46	10	0.0891	0.0755	0.052	0.709	0.00905	0.081	0.0979	0.0665	0.0857	0.0438	0.0618
166	98961	WNT7A	12786	positive regulation of transcription, DNA-templated	GO:0045893	biological process	46	49	0.0895	0.0755	0.0526	0.708	0.00633	0.0848	0.0946	0.0653	0.0872	0.0466	0.0593
167	98961	WNT7A	12786	stem cell development	GO:0048864	biological process	46	3	0.0936	0.0801	0.0537	0.701	0.0385	0.0639	0.137	0.051	0.126	0.0262	0.11
168	98961	WNT7A	12786	dendritic spine morphogenesis	GO:0060997	biological process	46	4	0.0941	0.0793	0.0546	0.699	0.04	0.0626	0.141	0.0476	0.132	0.0267	0.112
169	98961	WNT7A	12786	neuron differentiation	GO:0030182	biological process	46	24	0.0942	0.0773	0.0565	0.698	0.0235	0.0743	0.12	0.055	0.109	0.0362	0.0881
170	98961	WNT7A	12786	cellular response to transforming growth factor beta stimulus	GO:0071560	biological process	46	9	0.0944	0.0814	0.0566	0.697	0.0237	0.0752	0.119	0.0611	0.109	0.036	0.0888
171	98961	WNT7A	12786	secondary palate development	GO:0062009	biological process	46	2	0.0963	0.08	0.0601	0.691	0.0104	0.0857	0.108	0.0629	0.102	0.0497	0.0727
172	98961	WNT7A	12786	cartilage condensation	GO:0001502	biological process	46	2	0.1	0.0873	0.0441	0.72	0.081	0.0573	0.175	0.0495	0.154	0.00962	0.202
173	98961	WNT7A	12786	positive regulation of JNK cascade	GO:0046330	biological process	46	7	0.101	0.0872	0.0619	0.683	0.037	0.0705	0.144	0.0602	0.126	0.0306	0.125
174	98961	WNT7A	12786	regulation of presynapse assembly	GO:1905606	biological process	46	7	0.112	0.0962	0.0714	0.66	0.0501	0.0685	0.183	0.0586	0.158	0.0284	0.179
175	98961	WNT7A	12786	positive regulation of transcription by RNA polymerase II	GO:0045944	biological process	46	70	0.125	0.104	0.0917	0.631	0.0205	0.101	0.155	0.0764	0.141	0.0656	0.128
176	98961	WNT7A	12786	protein binding	GO:0005515	molecular function	46	831	0.14	0.118	0.109	0.605	0.019	0.114	0.171	0.0909	0.153	0.0807	0.148
177	98961	WNT7A	12786	cell proliferation in forebrain	GO:0021846	biological process	46	4	0.149	0.124	0.118	0.591	0.0314	0.107	0.206	0.0803	0.193	0.0747	0.187
178	98961	WNT7A	12786	cell fate commitment	GO:0045165	biological process	46	40	0.18	0.155	0.148	0.547	0.0566	0.1	0.325	0.0725	0.33	0.0638	0.343
179	1889549	TXNIP	16952	keratinocyte differentiation	GO:0030216	biological process	14	6	0.0639	0.0475	0.00922	0.909	0.0149	0.0632	0.0646	0.0374	0.0602	0.00648	0.0131
180	1889549	TXNIP	16952	ubiquitin protein ligase binding	GO:0031625	molecular function	14	24	0.0644	0.0494	0.0205	0.817	0.0101	0.0632	0.0657	0.0362	0.0675	0.0166	0.0253
181	1889549	TXNIP	16952	cellular response to tumor cell	GO:0071228	biological process	14	4	0.0682	0.0494	0.0246	0.796	0.021	0.0597	0.078	0.0362	0.0675	0.0157	0.0385
182	1889549	TXNIP	16952	negative regulation of cell division	GO:0051782	biological process	14	9	0.0747	0.0508	0.0313	0.769	0.0269	0.0645	0.0866	0.0375	0.0688	0.0178	0.0553
183	1889549	TXNIP	16952	cytoplasm	GO:0005737	cellular component	14	202	0.0821	0.0594	0.044	0.73	0.0117	0.0734	0.0919	0.0495	0.0712	0.0349	0.0556
184	1889549	TXNIP	16952	protein binding	GO:0005515	molecular function	14	831	0.0911	0.0637	0.0537	0.705	0.0154	0.0787	0.106	0.0491	0.0827	0.04	0.072
185	1889549	TXNIP	16952	protein transport	GO:0015031	biological process	14	27	0.415	0.406	0.406	0.332	0.0617	0.255	0.676	0.244	0.677	0.244	0.677
186	2682318	ZNF395	18737	DNA-binding transcription factor activity	GO:0003700	molecular function	14	23	0.0639	0.036	0.0121	0.883	0.00711	0.0632	0.0646	0.0299	0.0433	0.0106	0.0138
187	2682318	ZNF395	18737	DNA binding	GO:0003677	molecular function	14	31	0.0639	0.036	0.0138	0.866	0.00312	0.0632	0.0646	0.0299	0.0433	0.013	0.0147
188	2682318	ZNF395	18737	DNA-binding transcription activator activity, RNA polymerase II-specific	GO:0001228	molecular function	14	16	0.0639	0.036	0.0154	0.852	0.0127	0.0632	0.0646	0.0299	0.0433	0.0121	0.0196
189	2682318	ZNF395	18737	regulation of transcription by RNA polymerase II	GO:0006357	biological process	14	76	0.064	0.036	0.0196	0.822	0.00406	0.0631	0.0649	0.0299	0.0433	0.018	0.0214
190	2682318	ZNF395	18737	RNA polymerase II cis-regulatory region sequence-specific DNA binding	GO:0000978	molecular function	14	56	0.0641	0.036	0.0193	0.824	0.00569	0.0631	0.065	0.0299	0.0433	0.0171	0.0217
191	2682318	ZNF395	18737	cis-regulatory region sequence-specific DNA binding	GO:0000987	molecular function	14	6	0.0645	0.036	0.0203	0.818	0.00947	0.0628	0.0663	0.0299	0.0433	0.0166	0.0248
192	2682318	ZNF395	18737	nuclear speck	GO:0016607	cellular component	14	17	0.0647	0.036	0.0188	0.828	0.0166	0.0627	0.0667	0.0299	0.0433	0.0135	0.0262
193	2682318	ZNF395	18737	positive regulation of transcription by RNA polymerase II	GO:0045944	biological process	14	70	0.0732	0.0501	0.0334	0.761	0.0186	0.0631	0.085	0.0339	0.074	0.0226	0.0493
194	2682318	ZNF395	18737	nucleus	GO:0005634	cellular component	14	200	0.0985	0.0828	0.0621	0.686	0.0142	0.0856	0.113	0.0641	0.107	0.0481	0.0801
195	2682318	ZNF395	18737	nucleoplasm	GO:0005654	cellular component	14	161	0.115	0.0967	0.0806	0.651	0.0113	0.102	0.128	0.08	0.117	0.0666	0.0975
196	2682318	ZNF395	18737	cytosol	GO:0005829	cellular component	14	164	0.137	0.11	0.107	0.61	0.00435	0.132	0.143	0.104	0.117	0.0998	0.114
197	2682318	ZNF395	18737	cytoplasm	GO:0005737	cellular component	14	202	0.14	0.11	0.11	0.606	0.00377	0.135	0.145	0.104	0.117	0.104	0.117
198	1334446	RBPMS	19097	nucleoplasm	GO:0005654	cellular component	30	161	0.0639	0.0278	0.0136	0.868	0.0138	0.0632	0.0646	0.0211	0.0368	0.0106	0.0175
199	1334446	RBPMS	19097	RNA binding	GO:0003723	molecular function	30	82	0.0639	0.0278	0.0146	0.858	0.00277	0.0632	0.0646	0.0211	0.0368	0.0139	0.0154
200	1334446	RBPMS	19097	protein homodimerization activity	GO:0042803	molecular function	30	34	0.0639	0.0278	0.0149	0.856	0.0128	0.0632	0.0646	0.0211	0.0368	0.0117	0.0191
201	1334446	RBPMS	19097	mRNA binding	GO:0003729	molecular function	30	17	0.0639	0.0278	0.0168	0.84	0.00456	0.0632	0.0646	0.0211	0.0368	0.0155	0.0183
202	1334446	RBPMS	19097	transcription coactivator activity	GO:0003713	molecular function	30	7	0.0641	0.0278	0.0108	0.89	0.0312	0.0631	0.0651	0.0211	0.0368	0.00555	0.0209
203	1334446	RBPMS	19097	protein binding	GO:0005515	molecular function	30	831	0.0642	0.0278	0.0176	0.835	0.0105	0.0631	0.0653	0.0211	0.0368	0.0142	0.0218
204	1334446	RBPMS	19097	poly(A) binding	GO:0008143	molecular function	30	2	0.0647	0.0278	0.0171	0.84	0.0266	0.0627	0.0669	0.0211	0.0368	0.0101	0.029
205	1334446	RBPMS	19097	cytosol	GO:0005829	cellular component	30	164	0.0655	0.0278	0.0195	0.823	0.0183	0.062	0.0692	0.0211	0.0368	0.0133	0.0285
206	1334446	RBPMS	19097	positive regulation of SMAD protein signal transduction	GO:0060391	biological process	30	3	0.0657	0.0318	0.0197	0.823	0.0184	0.0629	0.0687	0.0258	0.0392	0.0135	0.0287
207	1334446	RBPMS	19097	cytoplasmic stress granule	GO:0010494	cellular component	30	2	0.0668	0.0287	0.02	0.822	0.034	0.0628	0.0711	0.0219	0.0376	0.0101	0.0395
208	1334446	RBPMS	19097	positive regulation of pathway-restricted SMAD protein phosphorylation	GO:0010862	biological process	30	4	0.0702	0.0328	0.0291	0.778	0.0125	0.0649	0.0759	0.0266	0.0404	0.0222	0.0381
209	1334446	RBPMS	19097	response to oxidative stress	GO:0006979	biological process	30	12	0.0919	0.0534	0.0534	0.703	0.0324	0.0659	0.128	0.0296	0.0961	0.0296	0.0961
210	1315215	DHRS3	17693	retinol dehydrogenase activity	GO:0004745	molecular function	13	2	0.0639	0.0257	0.00514	0.943	0.0105	0.0632	0.0646	0.0133	0.0496	0.00266	0.00992
211	1315215	DHRS3	17693	retinoid metabolic process	GO:0001523	biological process	13	7	0.0681	0.0416	0.0188	0.829	0.0397	0.0597	0.0776	0.023	0.0754	0.00836	0.0424
212	1315215	DHRS3	17693	lipid droplet	GO:0005811	cellular component	13	8	0.086	0.0719	0.0459	0.722	0.0335	0.0623	0.119	0.0422	0.122	0.0242	0.0871
213	1315215	DHRS3	17693	regulation of retinoic acid receptor signaling pathway	GO:0048385	biological process	13	4	0.151	0.129	0.119	0.589	0.0352	0.104	0.218	0.0665	0.248	0.0705	0.202
214	1315215	DHRS3	17693	oxidoreductase activity, acting on the CH-OH group of donors, NAD or NADP as acceptor	GO:0016616	molecular function	13	348	0.2	0.175	0.156	0.509	0.118	0.0666	0.599	0.0505	0.606	0.0408	0.599
215	103270	TFEB	11753	cellular response to amino acid starvation	GO:0034198	biological process	25	6	0.0662	0.145	0.0245	0.797	0.00572	0.0643	0.0681	0.133	0.159	0.0216	0.0277
216	103270	TFEB	11753	enzyme binding	GO:0019899	molecular function	25	49	0.0718	0.145	0.0318	0.767	0.0141	0.0652	0.0791	0.133	0.159	0.0235	0.0431
217	103270	TFEB	11753	positive regulation of autophagy	GO:0010508	biological process	25	11	0.0724	0.149	0.0331	0.763	0.00289	0.0698	0.075	0.13	0.171	0.031	0.0353
218	103270	TFEB	11753	cellular response to starvation	GO:0009267	biological process	25	28	0.0737	0.145	0.0308	0.771	0.0263	0.0642	0.0845	0.133	0.159	0.0176	0.0538
219	103270	TFEB	11753	DNA-binding transcription factor activity	GO:0003700	molecular function	25	23	0.0914	0.157	0.0517	0.707	0.0357	0.0642	0.13	0.123	0.2	0.0264	0.101
220	103270	TFEB	11753	regulation of gene expression	GO:0010468	biological process	25	31	0.103	0.157	0.0672	0.676	0.0047	0.0981	0.107	0.123	0.2	0.0618	0.073
221	103270	TFEB	11753	transcription regulatory region sequence-specific DNA binding	GO:0000976	molecular function	25	21	0.119	0.157	0.0853	0.643	0.0115	0.104	0.135	0.123	0.2	0.0702	0.104
222	103270	TFEB	11753	positive regulation of transcription by RNA polymerase II	GO:0045944	biological process	25	70	0.121	0.157	0.0875	0.639	0.00735	0.111	0.131	0.123	0.2	0.0774	0.0989
223	103270	TFEB	11753	DNA-binding transcription factor activity, RNA polymerase II-specific	GO:0000981	molecular function	25	47	0.121	0.157	0.0877	0.639	0.00786	0.111	0.131	0.123	0.2	0.0769	0.1
224	103270	TFEB	11753	sequence-specific double-stranded DNA binding	GO:1990837	molecular function	25	31	0.125	0.158	0.0918	0.632	0.0156	0.105	0.148	0.123	0.204	0.0709	0.119
225	103270	TFEB	11753	positive regulation of transcription, DNA-templated	GO:0045893	biological process	25	49	0.129	0.157	0.0971	0.624	0.0119	0.114	0.146	0.123	0.2	0.0799	0.118
226	103270	TFEB	11753	RNA polymerase II cis-regulatory region sequence-specific DNA binding	GO:0000978	molecular function	25	56	0.139	0.158	0.108	0.608	0.0107	0.125	0.154	0.123	0.204	0.0914	0.128
227	103270	TFEB	11753	nucleus	GO:0005634	cellular component	25	200	0.139	0.161	0.109	0.606	0.0222	0.11	0.177	0.121	0.214	0.0771	0.153
228	103270	TFEB	11753	regulation of transcription by RNA polymerase II	GO:0006357	biological process	25	76	0.143	0.161	0.114	0.6	0.0158	0.122	0.168	0.121	0.214	0.0895	0.144
229	103270	TFEB	11753	cytosol	GO:0005829	cellular component	25	164	0.162	0.177	0.134	0.571	0.0252	0.124	0.211	0.136	0.233	0.0928	0.194
230	103270	TFEB	11753	cytoplasm	GO:0005737	cellular component	25	202	0.171	0.182	0.144	0.559	0.0326	0.121	0.242	0.136	0.244	0.0892	0.231
231	103270	TFEB	11753	protein binding	GO:0005515	molecular function	25	831	0.172	0.18	0.147	0.558	0.0134	0.149	0.198	0.139	0.232	0.121	0.177
232	103270	TFEB	11753	lysosome organization	GO:0007040	biological process	25	3	0.214	0.268	0.161	0.504	0.11	0.0717	0.639	0.138	0.522	0.032	0.808
233	103270	TFEB	11753	lysosome localization	GO:0032418	biological process	25	5	0.287	0.281	0.272	0.437	0.0348	0.205	0.401	0.196	0.404	0.185	0.4
234	103270	TFEB	11753	lysosomal membrane	GO:0005765	cellular component	25	22	0.288	0.296	0.276	0.437	0.00879	0.264	0.314	0.285	0.307	0.251	0.304
235	96282	HTR3A	5297	ion transmembrane transport	GO:0034220	biological process	47	11	0.0639	0.0198	0.00271	0.966	0.00274	0.0632	0.0646	0.0172	0.0228	0.00201	0.00364
236	96282	HTR3A	5297	serotonin-gated cation-selective channel activity	GO:0022850	molecular function	47	3	0.0639	0.0198	0.00804	0.924	0.00516	0.0632	0.0646	0.0172	0.0228	0.00687	0.00942
237	96282	HTR3A	5297	serotonin-activated cation-selective channel complex	GO:1904602	cellular component	47	3	0.0639	0.0198	0.00811	0.922	0.00655	0.0632	0.0646	0.0172	0.0228	0.00654	0.01
238	96282	HTR3A	5297	neurotransmitter receptor activity	GO:0030594	molecular function	47	15	0.0639	0.0198	0.0098	0.907	0.00481	0.0632	0.0646	0.0172	0.0228	0.00877	0.011
239	96282	HTR3A	5297	serotonin binding	GO:0051378	molecular function	47	7	0.0639	0.0198	0.00944	0.897	0.0222	0.0632	0.0646	0.0172	0.0228	0.00479	0.0186
240	96282	HTR3A	5297	integral component of plasma membrane	GO:0005887	cellular component	47	76	0.0639	0.0198	0.0112	0.891	0.0113	0.0632	0.0646	0.0172	0.0228	0.00891	0.0141
241	96282	HTR3A	5297	chemical synaptic transmission	GO:0007268	biological process	47	23	0.0639	0.0198	0.0118	0.886	0.00641	0.0632	0.0646	0.0172	0.0228	0.0104	0.0134
242	96282	HTR3A	5297	synapse	GO:0045202	cellular component	47	29	0.0639	0.0198	0.0122	0.883	0.00115	0.0632	0.0646	0.0172	0.0228	0.0119	0.0124
243	96282	HTR3A	5297	neuron projection	GO:0043005	cellular component	47	35	0.0639	0.0198	0.013	0.874	0.00566	0.0632	0.0646	0.0172	0.0228	0.0117	0.0144
244	96282	HTR3A	5297	cleavage furrow	GO:0032154	cellular component	47	6	0.0639	0.0205	0.0144	0.86	0.0117	0.0632	0.0646	0.0174	0.0242	0.0117	0.0178
245	96282	HTR3A	5297	nervous system process	GO:0050877	biological process	47	19	0.0639	0.0231	0.0181	0.831	0.00283	0.0632	0.0646	0.0217	0.0245	0.017	0.0193
246	96282	HTR3A	5297	regulation of membrane potential	GO:0042391	biological process	47	31	0.0665	0.0288	0.0247	0.796	0.00906	0.0642	0.0689	0.0237	0.035	0.0203	0.03
247	96282	HTR3A	5297	signal transduction	GO:0007165	biological process	47	62	0.0849	0.048	0.0454	0.725	0.025	0.0682	0.106	0.0296	0.0779	0.0274	0.0754
248	96282	HTR3A	5297	protein binding	GO:0005515	molecular function	47	831	0.106	0.0704	0.0704	0.669	0.0147	0.0916	0.122	0.0547	0.0908	0.0547	0.0908
249	1330223	PAPSS2	8604	3'-phosphoadenosine 5'-phosphosulfate biosynthetic process	GO:0050428	biological process	18	5	0.0645	0.0388	0.0214	0.812	0.00559	0.0632	0.0657	0.0318	0.0474	0.019	0.024
250	1330223	PAPSS2	8604	sulfate assimilation	GO:0000103	biological process	18	4	0.0669	0.0388	0.0222	0.808	0.0195	0.0608	0.0735	0.0318	0.0474	0.0147	0.0337
251	1330223	PAPSS2	8604	adenylylsulfate kinase activity	GO:0004020	molecular function	18	3	0.067	0.0388	0.0265	0.788	0.00616	0.0644	0.0697	0.0318	0.0474	0.0232	0.0303
252	1330223	PAPSS2	8604	protein binding	GO:0005515	molecular function	18	831	0.116	0.0807	0.0807	0.649	0.0257	0.089	0.151	0.0519	0.125	0.0519	0.125
253	97770	PRODH	9453	proline catabolic process to glutamate	GO:0010133	biological process	14	3	0.0639	0.0395	0.0107	0.895	0.0173	0.0632	0.0646	0.0336	0.0464	0.00753	0.0152
254	97770	PRODH	9453	FAD binding	GO:0071949	molecular function	14	2	0.0639	0.0395	0.012	0.883	0.0119	0.0632	0.0646	0.0336	0.0464	0.00942	0.0152
255	97770	PRODH	9453	mitochondrion	GO:0005739	cellular component	14	93	0.0762	0.0644	0.0322	0.764	0.0359	0.0575	0.101	0.0334	0.124	0.0155	0.0669
256	97770	PRODH	9453	proline dehydrogenase activity	GO:0004657	molecular function	14	2	0.0943	0.0785	0.0546	0.7	0.0346	0.0665	0.134	0.0449	0.137	0.0284	0.105
257	97770	PRODH	9453	intracellular membrane-bounded organelle	GO:0043231	cellular component	14	80	0.107	0.0796	0.0691	0.667	0.0431	0.0689	0.167	0.0444	0.143	0.033	0.144
258	97770	PRODH	9453	nucleoplasm	GO:0005654	cellular component	14	161	0.112	0.089	0.0757	0.657	0.0316	0.0801	0.156	0.0577	0.137	0.0444	0.129
259	97770	PRODH	9453	positive regulation of cell death	GO:0010942	biological process	14	8	0.127	0.112	0.0886	0.626	0.0628	0.0659	0.245	0.0472	0.268	0.0335	0.234
260	1338013	CBFA2T3	1537	response to hypoxia	GO:0001666	biological process	30	15	0.0639	0.0304	0.00732	0.906	0.0324	0.0632	0.0646	0.0277	0.0334	0.0024	0.0224
261	1338013	CBFA2T3	1537	negative regulation of transcription, DNA-templated	GO:0045892	biological process	30	44	0.0639	0.0305	0.0105	0.894	0.0222	0.0632	0.0646	0.0279	0.0334	0.00667	0.0166
262	1338013	CBFA2T3	1537	transcription corepressor activity	GO:0003714	molecular function	30	7	0.0639	0.0305	0.0146	0.859	0.02	0.0632	0.0646	0.0279	0.0334	0.00986	0.0215
263	1338013	CBFA2T3	1537	nucleus	GO:0005634	cellular component	30	200	0.0642	0.0305	0.016	0.848	0.0174	0.0631	0.0653	0.0279	0.0334	0.0113	0.0225
264	1338013	CBFA2T3	1537	nucleoplasm	GO:0005654	cellular component	30	161	0.065	0.0305	0.019	0.826	0.016	0.0624	0.0677	0.0279	0.0334	0.0136	0.0265
265	1338013	CBFA2T3	1537	protein binding	GO:0005515	molecular function	30	831	0.0652	0.0305	0.0193	0.824	0.0157	0.0623	0.0682	0.0279	0.0334	0.0139	0.0269
266	1338013	CBFA2T3	1537	regulation of aerobic respiration	GO:1903715	biological process	30	2	0.069	0.0378	0.0274	0.784	0.0194	0.0608	0.0783	0.0282	0.0506	0.0182	0.0414
267	1338013	CBFA2T3	1537	granulocyte differentiation	GO:0030851	biological process	30	5	0.0702	0.0366	0.0265	0.788	0.0281	0.0588	0.0838	0.0254	0.0528	0.0147	0.0477
268	1338013	CBFA2T3	1537	positive regulation of proteasomal ubiquitin-dependent protein catabolic process	GO:0032436	biological process	30	11	0.0702	0.0358	0.0159	0.849	0.0504	0.059	0.0835	0.0281	0.0455	0.00568	0.0446
269	1338013	CBFA2T3	1537	negative regulation of cell population proliferation	GO:0008285	biological process	30	45	0.0754	0.0421	0.0355	0.755	0.0143	0.067	0.0849	0.0359	0.0493	0.0263	0.048
270	1338013	CBFA2T3	1537	negative regulation of glycolytic process	GO:0045820	biological process	30	9	0.0893	0.054	0.0505	0.711	0.0284	0.0681	0.117	0.035	0.0833	0.0294	0.0867
271	1914235	RASSF7	1166	protein binding	GO:0005515	molecular function	5	831	0.145	0.137	0.116	0.597	0.00418	0.139	0.153	0.109	0.171	0.109	0.124
272	1914235	RASSF7	1166	centriolar satellite	GO:0034451	cellular component	5	8	0.162	0.137	0.136	0.571	0.0165	0.137	0.193	0.109	0.171	0.107	0.172
273	1923737	PPP1R3G	14945	regulation of glycogen biosynthetic process	GO:0005979	biological process	5	6	0.0639	0.019	0.00902	0.913	0.0124	0.0632	0.0646	0.0127	0.0282	0.00668	0.0122
274	1923737	PPP1R3G	14945	glycogen binding	GO:2001069	molecular function	5	3	0.0653	0.0252	0.0203	0.819	0.0191	0.0622	0.0685	0.0195	0.0325	0.0138	0.03
275	1923737	PPP1R3G	14945	protein phosphatase 1 binding	GO:0008157	molecular function	5	3	0.0671	0.0202	0.0116	0.877	0.0482	0.0607	0.0742	0.012	0.0342	0.00401	0.0338
276	1923737	PPP1R3G	14945	protein phosphatase type 1 complex	GO:0000164	cellular component	5	3	0.0689	0.0306	0.0252	0.794	0.0205	0.0609	0.0779	0.0238	0.0393	0.0163	0.039
277	98927	VCL	12665	dystroglycan binding	GO:0002162	molecular function	63	2	0.0639	0.0285	0.00557	0.942	0.00804	0.0632	0.0646	0.0215	0.0379	0.00364	0.00854
278	98927	VCL	12665	alpha-catenin binding	GO:0045294	molecular function	63	2	0.0639	0.0285	0.00554	0.942	0.00925	0.0632	0.0646	0.0215	0.0379	0.00349	0.00879
279	98927	VCL	12665	adherens junction	GO:0005912	cellular component	63	14	0.0639	0.0285	0.00883	0.914	0.00978	0.0632	0.0646	0.0215	0.0379	0.00655	0.0119
280	98927	VCL	12665	actin binding	GO:0003779	molecular function	63	9	0.0639	0.0285	0.00915	0.913	0.00835	0.0632	0.0646	0.0215	0.0379	0.00744	0.0112
281	98927	VCL	12665	cell-cell junction	GO:0005911	cellular component	63	25	0.0639	0.0285	0.00859	0.908	0.0186	0.0632	0.0646	0.0215	0.0379	0.00451	0.0163
282	98927	VCL	12665	focal adhesion	GO:0005925	cellular component	63	30	0.0639	0.0285	0.0119	0.883	0.0153	0.0632	0.0646	0.0215	0.0379	0.00858	0.0164
283	98927	VCL	12665	cell-cell contact zone	GO:0044291	cellular component	63	8	0.0639	0.0285	0.0121	0.882	0.0118	0.0632	0.0646	0.0215	0.0379	0.0097	0.0152
284	98927	VCL	12665	regulation of protein localization to adherens junction	GO:1904702	biological process	63	4	0.0639	0.0285	0.0145	0.86	0.0113	0.0632	0.0646	0.0215	0.0379	0.0119	0.0177
285	98927	VCL	12665	regulation of focal adhesion assembly	GO:0051893	biological process	63	6	0.0639	0.0285	0.0148	0.857	0.00877	0.0632	0.0646	0.0215	0.0379	0.0126	0.0173
286	98927	VCL	12665	apical junction assembly	GO:0043297	biological process	63	2	0.0639	0.0288	0.0131	0.868	0.0253	0.0632	0.0646	0.0217	0.0383	0.00763	0.0225
287	98927	VCL	12665	cadherin binding	GO:0045296	molecular function	63	25	0.0639	0.031	0.0182	0.831	0.00869	0.0632	0.0646	0.0262	0.0366	0.0153	0.0216
288	98927	VCL	12665	extracellular vesicle	GO:1903561	cellular component	63	18	0.0654	0.033	0.0195	0.824	0.0214	0.062	0.0689	0.0289	0.0376	0.0126	0.0302
289	98927	VCL	12665	adherens junction assembly	GO:0034333	biological process	63	5	0.0658	0.0324	0.0177	0.836	0.0292	0.0628	0.0689	0.02	0.0523	0.00986	0.0317
290	98927	VCL	12665	epithelial cell-cell adhesion	GO:0090136	biological process	63	7	0.0689	0.0356	0.0216	0.813	0.0357	0.0614	0.0773	0.0204	0.0622	0.0105	0.0445
291	98927	VCL	12665	protein localization to cell surface	GO:0034394	biological process	63	4	0.0704	0.0343	0.017	0.839	0.0498	0.0588	0.0843	0.0185	0.0636	0.00594	0.0485
292	98927	VCL	12665	platelet aggregation	GO:0070527	biological process	63	3	0.0708	0.0383	0.0259	0.792	0.028	0.0644	0.0777	0.0219	0.067	0.0146	0.0462
293	98927	VCL	12665	costamere	GO:0043034	cellular component	63	2	0.0748	0.0402	0.0289	0.776	0.0395	0.0555	0.101	0.0206	0.0785	0.0129	0.0645
294	98927	VCL	12665	extracellular exosome	GO:0070062	cellular component	63	162	0.0777	0.0487	0.0384	0.746	0.0134	0.0686	0.0879	0.0341	0.0697	0.029	0.0507
295	98927	VCL	12665	regulation of establishment of endothelial barrier	GO:1903140	biological process	63	4	0.0782	0.0413	0.0299	0.773	0.049	0.0571	0.107	0.0194	0.0875	0.0113	0.079
296	98927	VCL	12665	ubiquitin protein ligase binding	GO:0031625	molecular function	63	24	0.0851	0.0544	0.0471	0.722	0.0121	0.0752	0.0964	0.0383	0.0771	0.0372	0.0598
297	98927	VCL	12665	protein binding	GO:0005515	molecular function	63	831	0.0991	0.0656	0.0627	0.684	0.0204	0.0795	0.123	0.0429	0.1	0.0429	0.0917
298	98927	VCL	12665	morphogenesis of an epithelium	GO:0002009	biological process	63	25	0.119	0.0827	0.0739	0.647	0.0763	0.055	0.258	0.0262	0.261	0.0216	0.253
299	98927	VCL	12665	protein-containing complex	GO:0032991	cellular component	63	373	0.185	0.142	0.138	0.539	0.0963	0.0699	0.49	0.0351	0.578	0.0321	0.594
300	2447164	CMTM5	19176	integral component of membrane	GO:0016021	cellular component	14	33	0.0639	0.0239	0.0142	0.862	0.00235	0.0632	0.0646	0.0197	0.0289	0.0136	0.0148
301	2447164	CMTM5	19176	protein binding	GO:0005515	molecular function	14	831	0.0659	0.0239	0.0239	0.799	0.00887	0.0626	0.0694	0.0197	0.0289	0.0197	0.0289
302	1346872	MAP3K1	6848	protein kinase binding	GO:0019901	molecular function	27	38	0.0639	0.0211	0.00576	0.939	0.0104	0.0632	0.0646	0.0174	0.0257	0.00363	0.00914
303	1346872	MAP3K1	6848	protein serine/threonine kinase activity	GO:0004674	molecular function	27	43	0.0639	0.0227	0.0127	0.876	0.0114	0.0632	0.0646	0.0181	0.0285	0.0102	0.0157
304	1346872	MAP3K1	6848	protein kinase activity	GO:0004672	molecular function	27	32	0.0639	0.0227	0.0146	0.859	0.00559	0.0632	0.0646	0.0181	0.0285	0.0131	0.0162
305	1346872	MAP3K1	6848	protein binding	GO:0005515	molecular function	27	831	0.0689	0.0307	0.0285	0.78	0.00239	0.0677	0.0701	0.0261	0.0362	0.0272	0.03
306	1346872	MAP3K1	6848	cellular response to mechanical stimulus	GO:0071260	biological process	27	7	0.0846	0.0381	0.0328	0.756	0.0686	0.0485	0.148	0.012	0.121	0.00898	0.12
307	1918781	PIEZO2	26270	cation channel activity	GO:0005261	molecular function	7	15	0.0723	0.115	0.0329	0.764	0.00388	0.0694	0.0753	0.0845	0.157	0.0302	0.0358
308	1918781	PIEZO2	26270	regulation of membrane potential	GO:0042391	biological process	7	31	0.0858	0.115	0.0483	0.719	0.00551	0.081	0.0909	0.0845	0.157	0.0434	0.0538
309	1918781	PIEZO2	26270	mechanosensitive ion channel activity	GO:0008381	molecular function	7	6	0.0869	0.115	0.0488	0.717	0.0169	0.0733	0.103	0.0845	0.157	0.0352	0.0676
310	1918781	PIEZO2	26270	cellular response to mechanical stimulus	GO:0071260	biological process	7	7	0.136	0.164	0.101	0.612	0.0476	0.0817	0.225	0.086	0.311	0.0472	0.215
311	1918781	PIEZO2	26270	plasma membrane	GO:0005886	cellular component	7	175	0.198	0.238	0.176	0.526	0.00599	0.185	0.211	0.212	0.267	0.163	0.191
312	1918781	PIEZO2	26270	detection of mechanical stimulus	GO:0050982	biological process	7	8	0.231	0.247	0.21	0.488	0.0429	0.15	0.356	0.178	0.343	0.126	0.352
313	1918781	PIEZO2	26270	membrane	GO:0016020	cellular component	7	157	0.246	0.243	0.23	0.475	0.000822	0.244	0.248	0.218	0.27	0.228	0.233
314	109169	EPAS1	3374	transcription factor binding	GO:0008134	molecular function	27	13	0.0639	0.0202	0.00481	0.946	0.0105	0.0632	0.0646	0.0144	0.0285	0.00275	0.00844
315	109169	EPAS1	3374	histone acetyltransferase binding	GO:0035035	molecular function	27	2	0.0639	0.0202	0.00584	0.932	0.0156	0.0632	0.0646	0.0144	0.0285	0.00244	0.014
316	109169	EPAS1	3374	DNA-binding transcription factor activity, RNA polymerase II-specific	GO:0000981	molecular function	27	47	0.0639	0.0202	0.00954	0.904	0.0171	0.0632	0.0646	0.0144	0.0285	0.00613	0.0149
317	109169	EPAS1	3374	RNA polymerase II transcription regulatory region sequence-specific DNA binding	GO:0000977	molecular function	27	14	0.0639	0.0202	0.0101	0.9	0.0163	0.0632	0.0646	0.0144	0.0285	0.00686	0.0147
318	109169	EPAS1	3374	sequence-specific DNA binding	GO:0043565	molecular function	27	14	0.0639	0.0202	0.0104	0.892	0.0207	0.0632	0.0646	0.0144	0.0285	0.00614	0.0177
319	109169	EPAS1	3374	protein heterodimerization activity	GO:0046982	molecular function	27	16	0.0639	0.0202	0.0116	0.887	0.0124	0.0632	0.0646	0.0144	0.0285	0.00908	0.0148
320	109169	EPAS1	3374	DNA binding	GO:0003677	molecular function	27	31	0.0639	0.0202	0.012	0.881	0.017	0.0632	0.0646	0.0144	0.0285	0.00841	0.017
321	109169	EPAS1	3374	transcription regulator complex	GO:0005667	cellular component	27	14	0.0639	0.0202	0.0129	0.874	0.00322	0.0632	0.0646	0.0144	0.0285	0.0123	0.0137
322	109169	EPAS1	3374	regulation of protein neddylation	GO:2000434	biological process	27	4	0.064	0.0215	0.0136	0.868	0.0238	0.0631	0.0649	0.0137	0.0338	0.00846	0.0218
323	109169	EPAS1	3374	regulation of transcription by RNA polymerase II	GO:0006357	biological process	27	76	0.0648	0.0227	0.0183	0.832	0.0231	0.0626	0.0671	0.0137	0.0379	0.0117	0.0288
324	109169	EPAS1	3374	protein binding	GO:0005515	molecular function	27	831	0.0669	0.0285	0.0263	0.789	0.00607	0.0642	0.0698	0.0217	0.0376	0.023	0.0301
325	109169	EPAS1	3374	positive regulation of transcription by RNA polymerase II	GO:0045944	biological process	27	70	0.0674	0.0236	0.0204	0.82	0.0286	0.0603	0.0752	0.0129	0.0432	0.0112	0.037
326	109169	EPAS1	3374	response to hypoxia	GO:0001666	biological process	27	15	0.0679	0.0236	0.0206	0.819	0.0313	0.0598	0.0771	0.0129	0.0432	0.0108	0.0393
327	109169	EPAS1	3374	cellular response to hypoxia	GO:0071456	biological process	27	11	0.0723	0.0261	0.024	0.799	0.0429	0.0563	0.0929	0.0117	0.058	0.00999	0.0576
328	1915077	ALDH6A1	7179	malonate-semialdehyde dehydrogenase (acetylating) activity	GO:0018478	molecular function	39	2	0.0639	0.0194	0.0071	0.93	0.00858	0.0632	0.0646	0.0189	0.02	0.00517	0.00975
329	1915077	ALDH6A1	7179	methylmalonate-semialdehyde dehydrogenase (acylating) activity	GO:0004491	molecular function	39	2	0.0639	0.0194	0.00726	0.929	0.00787	0.0632	0.0646	0.0189	0.02	0.00535	0.00984
330	1915077	ALDH6A1	7179	thymine catabolic process	GO:0006210	biological process	39	3	0.0639	0.0201	0.0119	0.886	0.00396	0.0632	0.0646	0.0191	0.0211	0.0109	0.0129
331	1915077	ALDH6A1	7179	valine catabolic process	GO:0006574	biological process	39	4	0.0639	0.0201	0.0129	0.875	0.00404	0.0632	0.0646	0.0191	0.0211	0.012	0.0138
332	1915077	ALDH6A1	7179	mitochondrion	GO:0005739	cellular component	39	93	0.0639	0.0201	0.0143	0.862	0.00318	0.0632	0.0646	0.0191	0.0211	0.0134	0.0151
333	1915077	ALDH6A1	7179	RNA binding	GO:0003723	molecular function	39	82	0.0667	0.03	0.0257	0.791	0.00211	0.0652	0.0681	0.0286	0.0315	0.0245	0.027
334	1915077	ALDH6A1	7179	nucleoplasm	GO:0005654	cellular component	39	161	0.0883	0.0512	0.0512	0.712	0.00409	0.0853	0.0914	0.0473	0.0554	0.0473	0.0554
335	1276545	NSD1	14234	transcription coregulator activity	GO:0003712	molecular function	18	7	0.0639	0.0446	0.00706	0.928	0.0126	0.0632	0.0646	0.0404	0.0492	0.00467	0.0107
336	1276545	NSD1	14234	regulation of histone H3-K36 methylation	GO:0000414	biological process	18	5	0.0639	0.0446	0.00988	0.906	0.00498	0.0632	0.0646	0.0404	0.0492	0.00879	0.0111
337	1276545	NSD1	14234	histone methyltransferase activity (H3-K36 specific)	GO:0046975	molecular function	18	2	0.0639	0.0446	0.0128	0.874	0.0184	0.0632	0.0646	0.0404	0.0492	0.00891	0.0184
338	1276545	NSD1	14234	RNA polymerase II cis-regulatory region sequence-specific DNA binding	GO:0000978	molecular function	18	56	0.0642	0.0454	0.0204	0.817	0.00473	0.0632	0.0653	0.0417	0.0493	0.0185	0.0225
339	1276545	NSD1	14234	regulation of transcription, DNA-templated	GO:0006355	biological process	18	36	0.0653	0.0454	0.0238	0.8	0.00215	0.064	0.0665	0.0417	0.0493	0.0227	0.0249
340	1276545	NSD1	14234	regulation of peptidyl-serine phosphorylation	GO:0033135	biological process	18	5	0.0658	0.0463	0.0223	0.808	0.0117	0.0631	0.0687	0.041	0.0523	0.0174	0.0285
341	1276545	NSD1	14234	androgen receptor binding	GO:0050681	molecular function	18	3	0.0669	0.046	0.0256	0.792	0.00816	0.0638	0.0701	0.0424	0.0499	0.0215	0.0304
342	1276545	NSD1	14234	regulation of RNA polymerase II regulatory region sequence-specific DNA binding	GO:1903025	biological process	18	4	0.0678	0.0463	0.0248	0.795	0.0173	0.0638	0.0721	0.041	0.0523	0.0172	0.0359
343	1276545	NSD1	14234	positive regulation of transcription, DNA-templated	GO:0045893	biological process	18	49	0.0782	0.0565	0.0391	0.743	0.0132	0.069	0.0885	0.0429	0.0745	0.0297	0.0516
344	1276545	NSD1	14234	nucleus	GO:0005634	cellular component	18	200	0.0989	0.0779	0.0629	0.685	0.00603	0.0936	0.104	0.0732	0.083	0.0564	0.0702
345	1276545	NSD1	14234	chromatin	GO:0000785	cellular component	18	17	0.104	0.083	0.0681	0.674	0.00915	0.0934	0.115	0.0745	0.0926	0.0579	0.0799
346	1276545	NSD1	14234	zinc ion binding	GO:0008270	molecular function	18	15	0.116	0.0884	0.0816	0.649	0.00811	0.105	0.127	0.0771	0.102	0.0712	0.0937
347	1276545	NSD1	14234	protein binding	GO:0005515	molecular function	18	831	0.156	0.129	0.129	0.581	0.00534	0.149	0.164	0.119	0.139	0.119	0.139
348	2446107	PDE2A	8777	3',5'-cyclic-AMP phosphodiesterase activity	GO:0004115	molecular function	54	3	0.0784	0.288	0.0389	0.744	0.018	0.066	0.093	0.16	0.518	0.027	0.0562
349	2446107	PDE2A	8777	cGMP-stimulated cyclic-nucleotide phosphodiesterase activity	GO:0004118	molecular function	54	2	0.0805	0.288	0.0411	0.737	0.0204	0.066	0.0982	0.16	0.518	0.0273	0.0619
350	2446107	PDE2A	8777	3',5'-cyclic-GMP phosphodiesterase activity	GO:0047555	molecular function	54	5	0.0823	0.288	0.0434	0.731	0.0175	0.0691	0.0979	0.16	0.518	0.0307	0.0613
351	2446107	PDE2A	8777	3',5'-cyclic-nucleotide phosphodiesterase activity	GO:0004114	molecular function	54	10	0.0883	0.288	0.0483	0.715	0.0331	0.064	0.122	0.16	0.518	0.0257	0.0908
352	2446107	PDE2A	8777	regulation of cAMP-mediated signaling	GO:0043949	biological process	54	5	0.0944	0.288	0.0561	0.698	0.0262	0.0728	0.122	0.16	0.518	0.0339	0.0929
353	2446107	PDE2A	8777	adenylate cyclase-inhibiting G protein-coupled receptor signaling pathway	GO:0007193	biological process	54	10	0.103	0.288	0.0627	0.68	0.0417	0.0685	0.155	0.16	0.518	0.0285	0.138
354	2446107	PDE2A	8777	synaptic membrane	GO:0097060	cellular component	54	10	0.107	0.315	0.072	0.667	0.00135	0.105	0.108	0.208	0.476	0.0703	0.0737
355	2446107	PDE2A	8777	regulation of cGMP-mediated signaling	GO:0010752	biological process	54	5	0.111	0.29	0.0744	0.659	0.0333	0.0782	0.158	0.163	0.515	0.0408	0.136
356	2446107	PDE2A	8777	cGMP catabolic process	GO:0046069	biological process	54	5	0.122	0.315	0.0889	0.636	0.0139	0.105	0.142	0.208	0.476	0.0706	0.112
357	2446107	PDE2A	8777	signal transduction	GO:0007165	biological process	54	62	0.123	0.288	0.0838	0.636	0.0572	0.0686	0.222	0.16	0.518	0.0325	0.216
358	2446107	PDE2A	8777	negative regulation of cGMP-mediated signaling	GO:0010754	biological process	54	3	0.133	0.317	0.1	0.616	0.0315	0.0951	0.187	0.208	0.483	0.0615	0.164
359	2446107	PDE2A	8777	cAMP-mediated signaling	GO:0019933	biological process	54	2	0.134	0.288	0.0931	0.617	0.0666	0.0679	0.264	0.16	0.518	0.0318	0.273
360	2446107	PDE2A	8777	cGMP-mediated signaling	GO:0019934	biological process	54	6	0.152	0.29	0.11	0.589	0.0739	0.0712	0.322	0.16	0.526	0.0335	0.36
361	2446107	PDE2A	8777	mitochondrial outer membrane	GO:0005741	cellular component	54	10	0.168	0.317	0.139	0.563	0.0382	0.112	0.252	0.208	0.483	0.0784	0.247
362	2446107	PDE2A	8777	negative regulation of cAMP-mediated signaling	GO:0043951	biological process	54	4	0.175	0.342	0.149	0.554	0.023	0.137	0.223	0.26	0.449	0.108	0.206
363	2446107	PDE2A	8777	cellular response to transforming growth factor beta stimulus	GO:0071560	biological process	54	9	0.203	0.349	0.182	0.52	0.00758	0.188	0.219	0.276	0.441	0.165	0.202
364	2446107	PDE2A	8777	magnesium ion binding	GO:0000287	molecular function	54	10	0.207	0.316	0.172	0.512	0.0765	0.0932	0.459	0.206	0.484	0.0575	0.512
365	2446107	PDE2A	8777	TPR domain binding	GO:0030911	molecular function	54	2	0.214	0.367	0.19	0.508	0.0405	0.141	0.324	0.326	0.414	0.11	0.327
366	2446107	PDE2A	8777	plasma membrane	GO:0005886	cellular component	54	175	0.218	0.36	0.198	0.504	0.00855	0.199	0.238	0.304	0.428	0.178	0.221
367	2446107	PDE2A	8777	phosphate ion binding	GO:0042301	molecular function	54	2	0.218	0.338	0.198	0.502	0.0275	0.164	0.29	0.25	0.455	0.138	0.283
368	2446107	PDE2A	8777	cellular response to cGMP	GO:0071321	biological process	54	6	0.222	0.325	0.2	0.498	0.0411	0.145	0.34	0.223	0.472	0.117	0.342
369	2446107	PDE2A	8777	cellular response to 2,3,7,8-tetrachlorodibenzodioxine	GO:1904613	biological process	54	3	0.228	0.329	0.198	0.488	0.0731	0.109	0.476	0.208	0.52	0.0776	0.506
370	2446107	PDE2A	8777	cGMP binding	GO:0030553	molecular function	54	4	0.229	0.349	0.212	0.492	0.0102	0.206	0.255	0.276	0.441	0.186	0.24
371	2446107	PDE2A	8777	mitochondrial inner membrane	GO:0005743	cellular component	54	17	0.231	0.348	0.213	0.49	0.019	0.19	0.281	0.275	0.442	0.168	0.27
372	2446107	PDE2A	8777	cellular response to cAMP	GO:0071320	biological process	54	9	0.233	0.334	0.207	0.483	0.0639	0.122	0.446	0.224	0.499	0.0923	0.465
373	2446107	PDE2A	8777	cAMP binding	GO:0030552	molecular function	54	4	0.239	0.348	0.222	0.481	0.0204	0.194	0.296	0.275	0.442	0.172	0.286
374	2446107	PDE2A	8777	positive regulation of gene expression	GO:0010628	biological process	54	30	0.242	0.35	0.215	0.471	0.0771	0.115	0.511	0.218	0.564	0.0883	0.523
375	2446107	PDE2A	8777	negative regulation of vascular permeability	GO:0043116	biological process	54	3	0.251	0.327	0.228	0.467	0.0568	0.14	0.447	0.223	0.479	0.112	0.464
376	2446107	PDE2A	8777	positive regulation of vascular permeability	GO:0043117	biological process	54	3	0.261	0.327	0.238	0.458	0.0589	0.144	0.473	0.223	0.479	0.115	0.492
377	2446107	PDE2A	8777	perinuclear region of cytoplasm	GO:0048471	cellular component	54	35	0.287	0.36	0.274	0.437	0.021	0.233	0.353	0.304	0.428	0.216	0.347
378	2446107	PDE2A	8777	cytoplasm	GO:0005737	cellular component	54	202	0.299	0.382	0.288	0.428	0.00329	0.29	0.309	0.359	0.407	0.278	0.299
379	2446107	PDE2A	8777	protein binding	GO:0005515	molecular function	54	831	0.308	0.389	0.297	0.42	0.0169	0.263	0.36	0.375	0.404	0.249	0.353
380	2446107	PDE2A	8777	cytosol	GO:0005829	cellular component	54	164	0.311	0.386	0.301	0.418	0.00922	0.286	0.339	0.368	0.405	0.273	0.331
381	2446107	PDE2A	8777	zinc ion binding	GO:0008270	molecular function	54	15	0.329	0.382	0.319	0.404	0.0141	0.288	0.375	0.347	0.42	0.276	0.369
382	2446107	PDE2A	8777	protein homodimerization activity	GO:0042803	molecular function	54	34	0.33	0.386	0.321	0.403	0.00432	0.318	0.344	0.368	0.405	0.307	0.336
383	2446107	PDE2A	8777	negative regulation of transcription by RNA polymerase II	GO:0000122	biological process	54	57	0.335	0.384	0.325	0.398	0.0289	0.257	0.436	0.32	0.462	0.243	0.434
384	2446107	PDE2A	8777	mitochondrial matrix	GO:0005759	cellular component	54	12	0.347	0.394	0.338	0.39	0.0157	0.301	0.399	0.381	0.408	0.29	0.394
385	2446107	PDE2A	8777	nucleus	GO:0005634	cellular component	54	200	0.372	0.399	0.365	0.371	0.00962	0.342	0.404	0.385	0.414	0.333	0.4
386	2446107	PDE2A	8777	cellular response to macrophage colony-stimulating factor stimulus	GO:0036006	biological process	54	3	0.475	0.5	0.469	0.297	0.0454	0.326	0.692	0.372	0.672	0.317	0.696
387	2446107	PDE2A	8777	regulation of mitochondrion organization	GO:0010821	biological process	54	14	0.542	0.544	0.538	0.254	0.0472	0.387	0.758	0.386	0.765	0.382	0.759
388	1929518	ZIC5	20322	sequence-specific double-stranded DNA binding	GO:1990837	molecular function	7	31	0.0639	0.0352	0.0134	0.87	0.014	0.0632	0.0646	0.0213	0.0583	0.0104	0.0173
389	1929518	ZIC5	20322	DNA-binding transcription factor activity, RNA polymerase II-specific	GO:0000981	molecular function	7	47	0.0667	0.0352	0.0188	0.829	0.0287	0.0609	0.0729	0.0213	0.0583	0.0104	0.0339
390	1929518	ZIC5	20322	RNA polymerase II cis-regulatory region sequence-specific DNA binding	GO:0000978	molecular function	7	56	0.0681	0.0352	0.0209	0.817	0.0318	0.0597	0.0776	0.0213	0.0583	0.0109	0.0403
391	1929518	ZIC5	20322	regulation of transcription by RNA polymerase II	GO:0006357	biological process	7	76	0.0697	0.0352	0.0251	0.794	0.0299	0.0584	0.0832	0.0213	0.0583	0.0134	0.047
392	1929518	ZIC5	20322	central nervous system development	GO:0007417	biological process	7	9	0.0763	0.0446	0.0372	0.75	0.0138	0.0682	0.0853	0.0335	0.0593	0.0279	0.0494
393	1929518	ZIC5	20322	nucleus	GO:0005634	cellular component	7	200	0.11	0.0745	0.0745	0.661	0.0182	0.0914	0.132	0.0545	0.102	0.0545	0.102
394	1888513	FZD2	4040	Wnt-protein binding	GO:0017147	molecular function	28	6	0.0639	0.0359	0.00413	0.955	0.00469	0.0632	0.0646	0.0321	0.0402	0.00293	0.0058
395	1888513	FZD2	4040	PDZ domain binding	GO:0030165	molecular function	28	8	0.0639	0.0359	0.0103	0.9	0.0105	0.0632	0.0646	0.0321	0.0402	0.00799	0.0133
396	1888513	FZD2	4040	Wnt-activated receptor activity	GO:0042813	molecular function	28	5	0.0639	0.0359	0.0118	0.887	0.000748	0.0632	0.0646	0.0321	0.0402	0.0116	0.012
397	1888513	FZD2	4040	canonical Wnt signaling pathway	GO:0060070	biological process	28	27	0.0639	0.0359	0.0131	0.872	0.000903	0.0632	0.0646	0.0321	0.0402	0.0129	0.0133
398	1888513	FZD2	4040	integral component of membrane	GO:0016021	cellular component	28	33	0.0645	0.0448	0.0202	0.819	0.0121	0.0639	0.0652	0.0393	0.0509	0.0158	0.0258
399	1888513	FZD2	4040	positive regulation of DNA-binding transcription factor activity	GO:0051091	biological process	28	12	0.0653	0.0379	0.0169	0.842	0.0263	0.0621	0.0686	0.0306	0.0469	0.00996	0.0287
400	1888513	FZD2	4040	non-canonical Wnt signaling pathway	GO:0035567	biological process	28	10	0.0671	0.0463	0.0244	0.797	0.0154	0.0618	0.0728	0.0382	0.056	0.0176	0.034
401	1888513	FZD2	4040	focal adhesion	GO:0005925	cellular component	28	30	0.0779	0.0571	0.0392	0.744	0.00409	0.0745	0.0814	0.0515	0.0634	0.0361	0.0424
402	1888513	FZD2	4040	Wnt signaling pathway	GO:0016055	biological process	28	20	0.0781	0.0559	0.037	0.749	0.024	0.064	0.0954	0.0416	0.0751	0.0225	0.0611
403	1888513	FZD2	4040	plasma membrane	GO:0005886	cellular component	28	175	0.0827	0.0607	0.045	0.727	0.00432	0.0786	0.087	0.0519	0.0709	0.0413	0.0491
404	1888513	FZD2	4040	positive regulation of transcription, DNA-templated	GO:0045893	biological process	28	49	0.1	0.0732	0.0647	0.681	0.00411	0.0972	0.104	0.0714	0.075	0.0602	0.0696
405	1888513	FZD2	4040	protein binding	GO:0005515	molecular function	28	831	0.104	0.0748	0.0685	0.673	0.00145	0.101	0.106	0.0735	0.076	0.0668	0.0703
406	1888513	FZD2	4040	cytoplasm	GO:0005737	cellular component	28	202	0.141	0.111	0.111	0.603	0.0091	0.127	0.156	0.0963	0.128	0.0963	0.128
407	3694646	KCNG2	6249	potassium ion transmembrane transport	GO:0071805	biological process	10	11	0.0641	0.0396	0.0179	0.833	0.011	0.0631	0.0652	0.034	0.0463	0.0143	0.0224
408	3694646	KCNG2	6249	voltage-gated potassium channel activity	GO:0005249	molecular function	10	13	0.0664	0.0396	0.0212	0.814	0.0213	0.0612	0.0721	0.034	0.0463	0.0135	0.0332
409	3694646	KCNG2	6249	integral component of membrane	GO:0016021	cellular component	10	33	0.0686	0.0419	0.028	0.782	0.00491	0.0662	0.071	0.033	0.0531	0.0252	0.0311
410	3694646	KCNG2	6249	voltage-gated potassium channel complex	GO:0008076	cellular component	10	21	0.0751	0.0472	0.034	0.758	0.0271	0.0588	0.096	0.0299	0.0744	0.0195	0.0592
411	3694646	KCNG2	6249	extracellular exosome	GO:0070062	cellular component	10	162	0.12	0.0868	0.0868	0.64	0.00199	0.117	0.123	0.0838	0.0899	0.0838	0.0899
412	98824	TRHR	12299	thyrotropin-releasing hormone receptor activity	GO:0004997	molecular function	4	2	0.0639	0.025	0.00833	0.917	0.0123	0.0632	0.0646	0.0171	0.0365	0.00571	0.0122
413	98824	TRHR	12299	phospholipase C-activating G protein-coupled receptor signaling pathway	GO:0007200	biological process	4	14	0.0647	0.028	0.0186	0.83	0.0227	0.0642	0.0651	0.0181	0.0432	0.0121	0.0288
414	98824	TRHR	12299	protein binding	GO:0005515	molecular function	4	831	0.138	0.106	0.106	0.61	0.0158	0.117	0.162	0.0834	0.136	0.0834	0.136
415	101863	ALDOC	418	glycolytic process	GO:0006096	biological process	29	13	0.0639	0.0341	0.00573	0.941	0.00731	0.0632	0.0646	0.0289	0.0404	0.00384	0.00854
416	101863	ALDOC	418	cytoskeletal protein binding	GO:0008092	molecular function	29	24	0.0639	0.0341	0.00957	0.905	0.0166	0.0632	0.0646	0.0289	0.0404	0.00657	0.0139
417	101863	ALDOC	418	fructose 1,6-bisphosphate metabolic process	GO:0030388	biological process	29	7	0.0639	0.0382	0.0158	0.849	0.0105	0.0632	0.0646	0.0366	0.0399	0.0129	0.0193
418	101863	ALDOC	418	epithelial cell differentiation	GO:0030855	biological process	29	31	0.0677	0.0437	0.0237	0.802	0.0243	0.0611	0.075	0.0339	0.0564	0.0143	0.0393
419	101863	ALDOC	418	fructose-bisphosphate aldolase activity	GO:0004332	molecular function	29	3	0.0686	0.0485	0.0274	0.785	0.0108	0.0645	0.0729	0.0383	0.0613	0.0217	0.0344
420	101863	ALDOC	418	extracellular exosome	GO:0070062	cellular component	29	162	0.0838	0.0618	0.0463	0.724	0.00503	0.0788	0.0891	0.0559	0.0683	0.0419	0.0512
421	101863	ALDOC	418	cytosol	GO:0005829	cellular component	29	164	0.131	0.112	0.0991	0.621	0.00668	0.122	0.14	0.102	0.122	0.0889	0.11
422	101863	ALDOC	418	protein binding	GO:0005515	molecular function	29	831	0.151	0.123	0.123	0.588	0.00666	0.141	0.162	0.111	0.135	0.111	0.135
423	109352	UNG	12572	damaged DNA binding	GO:0003684	molecular function	12	7	0.0639	0.0254	0.0108	0.896	0.00748	0.0632	0.0646	0.0205	0.0315	0.00909	0.0128
424	109352	UNG	12572	uracil DNA N-glycosylase activity	GO:0004844	molecular function	12	5	0.0639	0.0254	0.0118	0.884	0.0154	0.0632	0.0646	0.0205	0.0315	0.0085	0.0162
425	109352	UNG	12572	base-excision repair, AP site formation via deaminated base removal	GO:0097510	biological process	12	2	0.0639	0.0254	0.0124	0.878	0.0129	0.0632	0.0646	0.0205	0.0315	0.0096	0.0161
426	109352	UNG	12572	ribosomal small subunit binding	GO:0043024	molecular function	12	2	0.0645	0.0254	0.0144	0.861	0.0278	0.0628	0.0663	0.0205	0.0315	0.00824	0.025
427	109352	UNG	12572	mitochondrion	GO:0005739	cellular component	12	93	0.0649	0.0269	0.0214	0.812	0.00978	0.063	0.0669	0.0229	0.0316	0.0174	0.0263
428	109352	UNG	12572	nucleus	GO:0005634	cellular component	12	200	0.0652	0.0269	0.0228	0.805	0.00773	0.0629	0.0677	0.0229	0.0316	0.0192	0.0269
429	109352	UNG	12572	protein binding	GO:0005515	molecular function	12	831	0.0843	0.0463	0.0463	0.724	0.0115	0.0765	0.0929	0.037	0.058	0.037	0.058
430	95728	GLI2	4318	DNA-binding transcription factor activity	GO:0003700	molecular function	29	23	0.0639	0.0246	0.00445	0.953	7.41e-05	0.0632	0.0646	0.0215	0.0281	0.00444	0.00446
431	95728	GLI2	4318	promoter-specific chromatin binding	GO:1990841	molecular function	29	3	0.0639	0.0246	0.00705	0.931	0.0069	0.0632	0.0646	0.0215	0.0281	0.00529	0.00939
432	95728	GLI2	4318	regulation of transcription by RNA polymerase II	GO:0006357	biological process	29	76	0.0639	0.0246	0.00871	0.918	0.00285	0.0632	0.0646	0.0215	0.0281	0.00804	0.00944
433	95728	GLI2	4318	sequence-specific DNA binding	GO:0043565	molecular function	29	14	0.0639	0.0246	0.00838	0.918	0.0117	0.0632	0.0646	0.0215	0.0281	0.00597	0.0118
434	95728	GLI2	4318	DNA-binding transcription factor activity, RNA polymerase II-specific	GO:0000981	molecular function	29	47	0.0639	0.0246	0.00994	0.905	0.0041	0.0632	0.0646	0.0215	0.0281	0.00905	0.0109
435	95728	GLI2	4318	sequence-specific double-stranded DNA binding	GO:1990837	molecular function	29	31	0.0639	0.0246	0.0106	0.899	0.00485	0.0632	0.0646	0.0215	0.0281	0.00952	0.0118
436	95728	GLI2	4318	RNA polymerase II cis-regulatory region sequence-specific DNA binding	GO:0000978	molecular function	29	56	0.0639	0.0246	0.0106	0.898	0.00534	0.0632	0.0646	0.0215	0.0281	0.00936	0.012
437	95728	GLI2	4318	positive regulation of transcription by RNA polymerase II	GO:0045944	biological process	29	70	0.0639	0.0246	0.0123	0.881	0.00405	0.0632	0.0646	0.0215	0.0281	0.0115	0.0132
438	95728	GLI2	4318	negative regulation of transcription by RNA polymerase II	GO:0000122	biological process	29	57	0.0639	0.0246	0.0143	0.862	0.0102	0.0632	0.0646	0.0215	0.0281	0.0119	0.0171
439	95728	GLI2	4318	positive regulation of transcription, DNA-templated	GO:0045893	biological process	29	49	0.0639	0.0246	0.0148	0.858	0.0145	0.0632	0.0646	0.0215	0.0281	0.0113	0.0194
440	95728	GLI2	4318	hair follicle morphogenesis	GO:0031069	biological process	29	3	0.0639	0.0252	0.0124	0.877	0.019	0.0632	0.0646	0.0224	0.0282	0.00829	0.0184
441	95728	GLI2	4318	transcription factor binding	GO:0008134	molecular function	29	13	0.0639	0.0263	0.0154	0.853	0.014	0.0632	0.0646	0.0232	0.0298	0.0119	0.0199
442	95728	GLI2	4318	nucleus	GO:0005634	cellular component	29	200	0.0643	0.0289	0.0207	0.816	0.00358	0.0632	0.0655	0.0279	0.0299	0.0192	0.0223
443	95728	GLI2	4318	positive regulation of DNA replication	GO:0045740	biological process	29	5	0.0664	0.0316	0.0227	0.805	0.014	0.0631	0.0698	0.0264	0.038	0.0169	0.0306
444	95728	GLI2	4318	nucleoplasm	GO:0005654	cellular component	29	161	0.0699	0.0382	0.0297	0.775	0.00454	0.0671	0.0728	0.0348	0.0419	0.0269	0.0328
445	95728	GLI2	4318	zinc ion binding	GO:0008270	molecular function	29	15	0.0746	0.0408	0.0355	0.755	0.00438	0.071	0.0783	0.037	0.0449	0.0324	0.039
446	95728	GLI2	4318	nucleolus	GO:0005730	cellular component	29	26	0.0761	0.0408	0.0372	0.75	0.00399	0.0729	0.0795	0.037	0.0449	0.0343	0.0404
447	95728	GLI2	4318	protein binding	GO:0005515	molecular function	29	831	0.0814	0.0452	0.0436	0.731	0.00325	0.0779	0.0851	0.041	0.0498	0.0409	0.0465
448	95728	GLI2	4318	smoothened signaling pathway	GO:0007224	biological process	29	10	0.0905	0.0538	0.0523	0.708	0.0207	0.0737	0.111	0.0381	0.076	0.0352	0.0779
449	1916960	ARAP1	16925	cytoplasmic vesicle	GO:0031410	cellular component	20	47	0.0743	0.203	0.0348	0.757	0.00836	0.0687	0.0803	0.182	0.226	0.0292	0.0415
450	1916960	ARAP1	16925	positive regulation of GTPase activity	GO:0043547	biological process	20	8	0.093	0.203	0.0564	0.699	0.0112	0.0822	0.105	0.182	0.226	0.0455	0.0699
451	1916960	ARAP1	16925	positive regulation of filopodium assembly	GO:0051491	biological process	20	4	0.0999	0.203	0.0637	0.682	0.0184	0.082	0.122	0.182	0.226	0.0455	0.0892
452	1916960	ARAP1	16925	regulation of cellular component movement	GO:0051270	biological process	20	9	0.113	0.203	0.0778	0.655	0.0215	0.0896	0.142	0.182	0.226	0.0536	0.113
453	1916960	ARAP1	16925	negative regulation of stress fiber assembly	GO:0051497	biological process	20	3	0.113	0.203	0.079	0.654	0.0108	0.1	0.128	0.182	0.226	0.0656	0.0951
454	1916960	ARAP1	16925	intracellular membrane-bounded organelle	GO:0043231	cellular component	20	80	0.13	0.205	0.0984	0.622	0.0146	0.112	0.151	0.184	0.227	0.078	0.124
455	1916960	ARAP1	16925	plasma membrane	GO:0005886	cellular component	20	175	0.138	0.205	0.108	0.609	0.000717	0.137	0.138	0.184	0.227	0.106	0.109
456	1916960	ARAP1	16925	Golgi apparatus	GO:0005794	cellular component	20	55	0.152	0.205	0.124	0.587	0.000527	0.15	0.153	0.185	0.228	0.123	0.125
457	1916960	ARAP1	16925	regulation of cell shape	GO:0008360	biological process	20	23	0.154	0.209	0.126	0.583	0.0167	0.128	0.185	0.181	0.241	0.0989	0.161
458	1916960	ARAP1	16925	GTPase activator activity	GO:0005096	molecular function	20	12	0.194	0.228	0.169	0.529	0.0392	0.13	0.291	0.182	0.287	0.103	0.279
459	1916960	ARAP1	16925	phosphatidylinositol-3,4,5-trisphosphate binding	GO:0005547	molecular function	20	4	0.204	0.235	0.183	0.519	0.0214	0.163	0.256	0.188	0.293	0.137	0.242
460	1916960	ARAP1	16925	protein binding	GO:0005515	molecular function	20	831	0.224	0.254	0.206	0.497	0.00786	0.206	0.243	0.236	0.273	0.186	0.227
461	1916960	ARAP1	16925	cytosol	GO:0005829	cellular component	20	164	0.239	0.257	0.222	0.483	0.00418	0.228	0.25	0.245	0.27	0.211	0.233
462	1916960	ARAP1	16925	nucleoplasm	GO:0005654	cellular component	20	161	0.288	0.29	0.276	0.437	0.00229	0.281	0.295	0.279	0.302	0.269	0.283
463	1916960	ARAP1	16925	trans-Golgi network	GO:0005802	cellular component	20	8	0.324	0.335	0.311	0.405	0.0378	0.226	0.465	0.256	0.437	0.207	0.468
464	2385958	C1QTNF5	14344	plasma membrane	GO:0005886	cellular component	5	175	0.168	0.301	0.142	0.563	0.0166	0.141	0.2	0.241	0.375	0.112	0.18
465	2385958	C1QTNF5	14344	extracellular space	GO:0005615	cellular component	5	54	0.2	0.301	0.178	0.523	0.0212	0.16	0.249	0.241	0.375	0.135	0.234
466	2385958	C1QTNF5	14344	protein binding	GO:0005515	molecular function	5	831	0.249	0.301	0.233	0.472	0.0131	0.217	0.285	0.241	0.375	0.199	0.273
467	2385958	C1QTNF5	14344	cell projection	GO:0042995	cellular component	5	13	0.316	0.305	0.305	0.413	0.0217	0.256	0.39	0.242	0.386	0.242	0.386
468	102896	SULT1A1	11453	flavonol 3-sulfotransferase activity	GO:0047894	molecular function	14	2	0.0639	0.0603	0.016	0.847	0.0182	0.0632	0.0646	0.0376	0.0966	0.0114	0.0226
469	102896	SULT1A1	11453	aryl sulfotransferase activity	GO:0004062	molecular function	14	2	0.0639	0.0603	0.0164	0.845	0.0168	0.0632	0.0646	0.0376	0.0966	0.012	0.0225
470	102896	SULT1A1	11453	steroid sulfotransferase activity	GO:0050294	molecular function	14	2	0.0639	0.0603	0.0168	0.842	0.0168	0.0633	0.0645	0.0376	0.0966	0.0123	0.0231
471	102896	SULT1A1	11453	ethanol catabolic process	GO:0006068	biological process	14	3	0.0729	0.0633	0.028	0.782	0.0346	0.0615	0.0864	0.0378	0.106	0.0138	0.0567
472	102896	SULT1A1	11453	flavonoid metabolic process	GO:0009812	biological process	14	11	0.0745	0.0613	0.0233	0.802	0.0565	0.0555	0.1	0.0375	0.1	0.00736	0.0735
473	102896	SULT1A1	11453	sulfotransferase activity	GO:0008146	molecular function	14	51	0.0818	0.0788	0.0436	0.731	0.0105	0.075	0.0892	0.0659	0.0942	0.0354	0.0538
474	102896	SULT1A1	11453	xenobiotic metabolic process	GO:0006805	biological process	14	33	0.0852	0.0765	0.0454	0.724	0.027	0.0676	0.108	0.0565	0.104	0.0262	0.0786
475	102896	SULT1A1	11453	3'-phosphoadenosine 5'-phosphosulfate metabolic process	GO:0050427	biological process	14	6	0.0865	0.0801	0.0487	0.717	0.0126	0.077	0.0971	0.0693	0.0927	0.0382	0.0621
476	102896	SULT1A1	11453	estrogen metabolic process	GO:0008210	biological process	14	5	0.104	0.104	0.0683	0.673	0.0227	0.0816	0.134	0.0756	0.144	0.0459	0.102
477	102896	SULT1A1	11453	sulfation	GO:0051923	biological process	14	3	0.138	0.154	0.0984	0.61	0.0618	0.0735	0.26	0.0868	0.272	0.0344	0.281
478	102896	SULT1A1	11453	3'-phosphoadenosine 5'-phosphosulfate binding	GO:0050656	molecular function	14	4	0.159	0.16	0.131	0.575	0.0285	0.117	0.217	0.101	0.252	0.0851	0.201
479	102896	SULT1A1	11453	cytoplasm	GO:0005737	cellular component	14	202	0.301	0.306	0.29	0.426	0.00486	0.288	0.315	0.278	0.337	0.275	0.305
480	102896	SULT1A1	11453	protein binding	GO:0005515	molecular function	14	831	0.326	0.324	0.316	0.405	0.0223	0.265	0.401	0.268	0.391	0.251	0.397
481	1926164	NADSYN1	29832	NAD biosynthetic process	GO:0009435	biological process	37	5	0.0639	0.0253	0.00903	0.915	0.00372	0.0632	0.0646	0.0177	0.0362	0.00816	0.01
482	1926164	NADSYN1	29832	'de novo' NAD biosynthetic process	GO:0034627	biological process	37	4	0.0639	0.0253	0.0112	0.892	0.00586	0.0632	0.0646	0.0177	0.0362	0.00994	0.0127
483	1926164	NADSYN1	29832	glutaminase activity	GO:0004359	molecular function	37	2	0.0641	0.0253	0.0164	0.844	0.0166	0.0631	0.0651	0.0177	0.0362	0.012	0.0224
484	1926164	NADSYN1	29832	NAD+ synthase (glutamine-hydrolyzing) activity	GO:0003952	molecular function	37	2	0.0642	0.0253	0.0158	0.849	0.0218	0.0631	0.0653	0.0177	0.0362	0.0104	0.0241
485	1926164	NADSYN1	29832	cytoplasm	GO:0005737	cellular component	37	202	0.075	0.0376	0.0354	0.755	0.0127	0.0667	0.0844	0.0311	0.0454	0.0272	0.0461
486	1926164	NADSYN1	29832	protein binding	GO:0005515	molecular function	37	831	0.0768	0.0391	0.0379	0.747	0.0104	0.0698	0.0846	0.033	0.0464	0.0305	0.0471
487	98933	VIP	12693	negative regulation of smooth muscle cell proliferation	GO:0048662	biological process	28	5	0.0639	0.0769	0.0122	0.881	0.00627	0.0632	0.0646	0.062	0.0954	0.0109	0.0138
488	98933	VIP	12693	neuropeptide hormone activity	GO:0005184	molecular function	28	7	0.0639	0.0769	0.0139	0.865	0.00351	0.0632	0.0646	0.062	0.0954	0.013	0.0149
489	98933	VIP	12693	negative regulation of potassium ion transport	GO:0043267	biological process	28	5	0.0652	0.0769	0.0206	0.817	0.014	0.0623	0.0683	0.062	0.0954	0.0153	0.0276
490	98933	VIP	12693	phospholipase C-activating G protein-coupled receptor signaling pathway	GO:0007200	biological process	28	14	0.0658	0.0769	0.021	0.814	0.0159	0.063	0.0688	0.062	0.0954	0.0151	0.0293
491	98933	VIP	12693	positive regulation of epinephrine secretion	GO:0032812	biological process	28	3	0.068	0.0769	0.0227	0.807	0.0243	0.0616	0.0751	0.062	0.0954	0.0137	0.0375
492	98933	VIP	12693	learning or memory	GO:0007611	biological process	28	6	0.0683	0.0769	0.0279	0.782	0.00841	0.0638	0.0732	0.062	0.0954	0.0232	0.0335
493	98933	VIP	12693	hormone activity	GO:0005179	molecular function	28	17	0.0729	0.0769	0.0328	0.764	0.0131	0.0653	0.0814	0.062	0.0954	0.025	0.0431
494	98933	VIP	12693	regulation of sensory perception of pain	GO:0051930	biological process	28	5	0.0772	0.077	0.0383	0.746	0.00651	0.0722	0.0824	0.0623	0.0952	0.0334	0.0438
495	98933	VIP	12693	positive regulation of endothelial cell proliferation	GO:0001938	biological process	28	9	0.0801	0.0805	0.042	0.736	0.00445	0.0776	0.0827	0.0709	0.0915	0.0385	0.0458
496	98933	VIP	12693	adenylate cyclase-activating G protein-coupled receptor signaling pathway	GO:0007189	biological process	28	17	0.0866	0.0807	0.0494	0.716	0.00233	0.0842	0.089	0.0712	0.0914	0.0472	0.0517
497	98933	VIP	12693	peptide hormone receptor binding	GO:0051428	molecular function	28	6	0.0873	0.0817	0.0482	0.717	0.0249	0.0686	0.111	0.0619	0.108	0.0293	0.0791
498	98933	VIP	12693	neuron projection	GO:0043005	cellular component	28	35	0.0879	0.0818	0.048	0.717	0.029	0.067	0.115	0.0619	0.108	0.027	0.0852
499	98933	VIP	12693	epinephrine secretion	GO:0048242	biological process	28	4	0.0919	0.0849	0.0535	0.704	0.0233	0.0724	0.117	0.0601	0.12	0.0345	0.0831
500	98933	VIP	12693	positive regulation of protein catabolic process	GO:0045732	biological process	28	11	0.114	0.11	0.0775	0.654	0.0282	0.0852	0.151	0.0829	0.145	0.0471	0.128
501	98933	VIP	12693	regulation of protein localization	GO:0032880	biological process	28	8	0.126	0.119	0.0942	0.628	0.0101	0.113	0.142	0.101	0.141	0.0799	0.111
502	98933	VIP	12693	positive regulation of penile erection	GO:0060406	biological process	28	5	0.138	0.128	0.107	0.609	0.0119	0.12	0.158	0.112	0.147	0.0887	0.13
503	98933	VIP	12693	negative regulation of apoptotic process	GO:0043066	biological process	28	33	0.168	0.156	0.142	0.563	0.0187	0.139	0.205	0.124	0.196	0.109	0.185
504	98933	VIP	12693	perikaryon	GO:0043204	cellular component	28	3	0.199	0.189	0.178	0.525	0.00804	0.182	0.217	0.175	0.204	0.16	0.197
505	98933	VIP	12693	protein binding	GO:0005515	molecular function	28	831	0.224	0.206	0.206	0.498	0.00198	0.22	0.228	0.201	0.211	0.201	0.211
506	1343086	PKIG	9019	cAMP-dependent protein kinase inhibitor activity	GO:0004862	molecular function	5	3	0.0799	0.168	0.04	0.74	0.0246	0.0647	0.0987	0.122	0.232	0.0241	0.0664
507	1343086	PKIG	9019	negative regulation of cAMP-dependent protein kinase activity	GO:2000480	biological process	5	3	0.106	0.176	0.0703	0.67	0.0135	0.0928	0.12	0.139	0.223	0.0554	0.0891
508	1343086	PKIG	9019	nucleus	GO:0005634	cellular component	5	200	0.233	0.29	0.216	0.487	0.0164	0.198	0.275	0.241	0.35	0.176	0.264
509	1343086	PKIG	9019	cytoplasm	GO:0005737	cellular component	5	202	0.29	0.29	0.278	0.435	0.0117	0.26	0.325	0.241	0.35	0.245	0.316
510	1343086	PKIG	9019	protein binding	GO:0005515	molecular function	5	831	0.301	0.29	0.29	0.426	0.018	0.255	0.357	0.241	0.35	0.24	0.35
511	97552	PGAM1	8888	glycolytic process	GO:0006096	biological process	21	13	0.0639	0.0966	0.0112	0.891	0.0146	0.0632	0.0646	0.086	0.109	0.00838	0.015
512	97552	PGAM1	8888	respiratory burst	GO:0045730	biological process	21	4	0.0728	0.102	0.0298	0.774	0.0254	0.0622	0.0852	0.0848	0.124	0.0175	0.0507
513	97552	PGAM1	8888	regulation of pentose-phosphate shunt	GO:0043456	biological process	21	8	0.0742	0.102	0.0335	0.761	0.0166	0.0655	0.0842	0.0848	0.124	0.0235	0.0479
514	97552	PGAM1	8888	extracellular exosome	GO:0070062	cellular component	21	162	0.0875	0.104	0.0503	0.714	0.00548	0.0822	0.0931	0.0889	0.122	0.0452	0.0559
515	97552	PGAM1	8888	membrane	GO:0016020	cellular component	21	157	0.0986	0.104	0.0627	0.685	0.00657	0.0917	0.106	0.089	0.122	0.0558	0.0705
516	97552	PGAM1	8888	regulation of glycolytic process	GO:0006110	biological process	21	10	0.0988	0.104	0.0618	0.685	0.0269	0.0743	0.132	0.0889	0.122	0.0382	0.1
517	97552	PGAM1	8888	protein kinase binding	GO:0019901	molecular function	21	38	0.103	0.108	0.0676	0.674	0.0167	0.0871	0.123	0.0984	0.12	0.05	0.0913
518	97552	PGAM1	8888	phosphoglycerate mutase activity	GO:0004619	molecular function	21	4	0.107	0.104	0.0713	0.667	0.0192	0.0866	0.132	0.089	0.122	0.0506	0.101
519	97552	PGAM1	8888	cytosol	GO:0005829	cellular component	21	164	0.123	0.109	0.0898	0.636	0.00285	0.119	0.126	0.099	0.12	0.0857	0.0942
520	97552	PGAM1	8888	cytoplasm	GO:0005737	cellular component	21	202	0.132	0.109	0.101	0.618	0.00528	0.125	0.141	0.099	0.12	0.093	0.11
521	97552	PGAM1	8888	protein binding	GO:0005515	molecular function	21	831	0.155	0.126	0.126	0.582	0.017	0.13	0.184	0.0986	0.162	0.0986	0.162
522	2154433	CBLN4	16231	collagen-containing extracellular matrix	GO:0062023	cellular component	2	28	0.0639	0.0079	0.0079	0.922	0.00986	0.0632	0.0646	0.00572	0.0109	0.00572	0.0109
523	1096863	ENTPD2	3364	nucleoside-diphosphatase activity	GO:0017110	molecular function	15	11	0.0639	0.0413	0.00849	0.919	0.00863	0.0632	0.0646	0.0386	0.0441	0.00675	0.0107
524	1096863	ENTPD2	3364	uridine-diphosphatase activity	GO:0045134	molecular function	15	2	0.0639	0.0413	0.015	0.855	0.00461	0.0632	0.0646	0.0386	0.0441	0.0139	0.0163
525	1096863	ENTPD2	3364	guanosine-diphosphatase activity	GO:0004382	molecular function	15	2	0.0639	0.0413	0.0155	0.851	0.00379	0.0632	0.0646	0.0386	0.0441	0.0145	0.0165
526	1096863	ENTPD2	3364	membrane	GO:0016020	cellular component	15	157	0.12	0.136	0.0867	0.64	0.00204	0.117	0.122	0.129	0.143	0.0836	0.0899
527	1096863	ENTPD2	3364	extracellular exosome	GO:0070062	cellular component	15	162	0.122	0.136	0.0887	0.637	0.000335	0.12	0.123	0.129	0.143	0.0882	0.0893
528	1096863	ENTPD2	3364	nucleoside diphosphate catabolic process	GO:0009134	biological process	15	7	0.139	0.14	0.108	0.607	0.00816	0.126	0.152	0.125	0.157	0.0956	0.123
529	1096863	ENTPD2	3364	plasma membrane	GO:0005886	cellular component	15	175	0.159	0.151	0.132	0.575	0.0102	0.143	0.177	0.131	0.176	0.114	0.154
530	1096863	ENTPD2	3364	protein binding	GO:0005515	molecular function	15	831	0.203	0.181	0.181	0.52	0.0132	0.177	0.232	0.153	0.215	0.153	0.215
531	1913736	ACOT11	18156	fatty acid metabolic process	GO:0006631	biological process	9	20	0.0648	0.0854	0.0198	0.821	0.0136	0.0626	0.067	0.0819	0.089	0.015	0.0263
532	1913736	ACOT11	18156	long-chain fatty acyl-CoA binding	GO:0036042	molecular function	9	4	0.0746	0.0854	0.0356	0.755	0.00393	0.0728	0.0764	0.0819	0.089	0.0328	0.0386
533	1913736	ACOT11	18156	acyl-CoA hydrolase activity	GO:0047617	molecular function	9	8	0.089	0.0854	0.0517	0.71	0.00832	0.0818	0.0967	0.0819	0.089	0.044	0.0608
534	1913736	ACOT11	18156	acyl-CoA metabolic process	GO:0006637	biological process	9	15	0.0921	0.0858	0.0555	0.701	0.0041	0.0875	0.097	0.0817	0.09	0.0513	0.06
535	1913736	ACOT11	18156	extracellular exosome	GO:0070062	cellular component	9	162	0.145	0.137	0.114	0.598	0.0182	0.12	0.174	0.104	0.18	0.0868	0.15
536	1913736	ACOT11	18156	cytosol	GO:0005829	cellular component	9	164	0.204	0.183	0.183	0.518	0.0189	0.168	0.249	0.143	0.234	0.143	0.234
537	107491	NXPH2	8076	signaling receptor binding	GO:0005102	molecular function	4	73	0.0693	0.0247	0.0247	0.796	0.0256	0.0606	0.0792	0.0144	0.0422	0.0144	0.0422
538	2388287	ACSF2	26101	fatty acid metabolic process	GO:0006631	biological process	8	20	0.0639	0.0219	0.013	0.874	0.00511	0.0632	0.0646	0.0201	0.0239	0.0119	0.0143
539	2388287	ACSF2	26101	medium-chain fatty acid-CoA ligase activity	GO:0031956	molecular function	8	5	0.0639	0.0219	0.0146	0.858	0.00474	0.0632	0.0646	0.0201	0.0239	0.0134	0.016
540	2388287	ACSF2	26101	protein binding	GO:0005515	molecular function	8	831	0.114	0.0801	0.0801	0.652	0.0115	0.101	0.129	0.0659	0.0972	0.0659	0.0972
541	1889505	B3GNT2	15629	N-acetyllactosaminide beta-1,3-N-acetylglucosaminyltransferase activity	GO:0008532	molecular function	8	3	0.0639	0.0537	0.00872	0.916	0.00698	0.0632	0.0646	0.0411	0.07	0.00708	0.0107
542	1889505	B3GNT2	15629	acetylglucosaminyltransferase activity	GO:0008375	molecular function	8	40	0.0639	0.0538	0.018	0.832	0.00481	0.0632	0.0646	0.0411	0.0704	0.0163	0.0199
543	1889505	B3GNT2	15629	acetylgalactosaminyltransferase activity	GO:0008376	molecular function	8	15	0.0692	0.0561	0.0285	0.78	0.0082	0.065	0.0737	0.0396	0.0796	0.0238	0.0341
544	1889505	B3GNT2	15629	poly-N-acetyllactosamine biosynthetic process	GO:0030311	biological process	8	5	0.0782	0.0598	0.0367	0.749	0.0309	0.059	0.104	0.0374	0.0956	0.0198	0.068
545	1889505	B3GNT2	15629	Golgi apparatus	GO:0005794	cellular component	8	55	0.0876	0.0703	0.0498	0.714	0.0157	0.0744	0.103	0.0513	0.0963	0.0369	0.0672
546	1889505	B3GNT2	15629	protein glycosylation	GO:0006486	biological process	8	19	0.124	0.107	0.0915	0.632	0.0189	0.101	0.153	0.0782	0.146	0.0671	0.125
547	1889505	B3GNT2	15629	protein binding	GO:0005515	molecular function	8	831	0.205	0.184	0.184	0.517	0.0176	0.171	0.246	0.146	0.232	0.146	0.232
548	2446219	ARHGEF16	15515	receptor tyrosine kinase binding	GO:0030971	molecular function	14	7	0.0639	0.0545	0.0149	0.856	0.0048	0.0632	0.0646	0.0443	0.0669	0.0137	0.0163
549	2446219	ARHGEF16	15515	PDZ domain binding	GO:0030165	molecular function	14	8	0.0642	0.0545	0.017	0.841	0.0209	0.0631	0.0653	0.0443	0.0669	0.0114	0.0253
550	2446219	ARHGEF16	15515	activation of GTPase activity	GO:0090630	biological process	14	6	0.0652	0.0545	0.0208	0.816	0.0146	0.0622	0.0684	0.0443	0.0669	0.0152	0.0283
551	2446219	ARHGEF16	15515	guanyl-nucleotide exchange factor activity	GO:0005085	molecular function	14	10	0.0745	0.0545	0.0352	0.756	0.00964	0.0682	0.0814	0.0443	0.0669	0.0288	0.043
552	2446219	ARHGEF16	15515	cell chemotaxis	GO:0060326	biological process	14	22	0.0761	0.0545	0.0369	0.75	0.0123	0.0689	0.084	0.0443	0.0669	0.0285	0.0478
553	2446219	ARHGEF16	15515	small GTPase binding	GO:0031267	molecular function	14	13	0.0764	0.0545	0.0369	0.75	0.0164	0.0671	0.0869	0.0443	0.0669	0.0262	0.0519
554	2446219	ARHGEF16	15515	cadherin binding	GO:0045296	molecular function	14	25	0.081	0.056	0.0426	0.734	0.00864	0.0756	0.0867	0.0477	0.0657	0.0359	0.0505
555	2446219	ARHGEF16	15515	positive regulation of protein localization to plasma membrane	GO:1903078	biological process	14	10	0.105	0.0783	0.0696	0.671	0.0157	0.0893	0.124	0.0595	0.103	0.0529	0.0917
556	2446219	ARHGEF16	15515	protein binding	GO:0005515	molecular function	14	831	0.162	0.136	0.136	0.572	0.0081	0.149	0.176	0.121	0.152	0.121	0.152
557	102768	MFGE8	7036	extracellular vesicle	GO:1903561	cellular component	12	18	0.0639	0.0447	0.0117	0.886	0.0119	0.0632	0.0646	0.0428	0.0466	0.00916	0.015
558	102768	MFGE8	7036	collagen-containing extracellular matrix	GO:0062023	cellular component	12	28	0.0639	0.0447	0.0153	0.853	0.00488	0.0632	0.0646	0.0428	0.0466	0.014	0.0166
559	102768	MFGE8	7036	phosphatidylserine binding	GO:0001786	molecular function	12	6	0.0734	0.0657	0.0334	0.761	0.0193	0.0631	0.0853	0.0449	0.0962	0.0222	0.0503
560	102768	MFGE8	7036	extracellular exosome	GO:0070062	cellular component	12	162	0.101	0.0783	0.0646	0.681	0.013	0.0877	0.115	0.0637	0.0963	0.0514	0.0814
561	102768	MFGE8	7036	membrane	GO:0016020	cellular component	12	157	0.106	0.0783	0.0715	0.668	0.00654	0.0999	0.113	0.0637	0.0963	0.0638	0.08
562	102768	MFGE8	7036	extracellular space	GO:0005615	cellular component	12	54	0.112	0.0786	0.0775	0.656	0.0137	0.0974	0.128	0.0636	0.097	0.0611	0.0982
563	1201674	SMAD3	6769	DEAD/H-box RNA helicase binding	GO:0017151	molecular function	111	2	0.0639	0.042	0.00621	0.939	0.00414	0.0632	0.0646	0.0409	0.0432	0.00507	0.00762
564	1201674	SMAD3	6769	co-SMAD binding	GO:0070410	molecular function	111	2	0.0639	0.042	0.0101	0.904	0.00331	0.0632	0.0646	0.0409	0.0432	0.00934	0.0109
565	1201674	SMAD3	6769	I-SMAD binding	GO:0070411	molecular function	111	2	0.0639	0.042	0.0103	0.902	0.00507	0.0632	0.0646	0.0409	0.0432	0.00914	0.0115
566	1201674	SMAD3	6769	R-SMAD binding	GO:0070412	molecular function	111	4	0.0639	0.042	0.0103	0.902	0.00207	0.0632	0.0646	0.0409	0.0432	0.00984	0.0108
567	1201674	SMAD3	6769	response to hypoxia	GO:0001666	biological process	111	15	0.0639	0.042	0.0107	0.897	0.00789	0.0632	0.0646	0.0409	0.0432	0.0091	0.0126
568	1201674	SMAD3	6769	regulation of transforming growth factor beta receptor signaling pathway	GO:0017015	biological process	111	7	0.0639	0.042	0.0113	0.891	0.00596	0.0632	0.0646	0.0409	0.0432	0.00991	0.0129
569	1201674	SMAD3	6769	transforming growth factor beta receptor binding	GO:0005160	molecular function	111	5	0.0639	0.042	0.0113	0.89	0.00971	0.0632	0.0646	0.0409	0.0432	0.00925	0.0139
570	1201674	SMAD3	6769	cellular response to transforming growth factor beta stimulus	GO:0071560	biological process	111	9	0.0639	0.042	0.0115	0.886	0.0189	0.0632	0.0646	0.0409	0.0432	0.00779	0.017
571	1201674	SMAD3	6769	negative regulation of transcription by RNA polymerase II	GO:0000122	biological process	111	57	0.0639	0.042	0.0119	0.885	0.00876	0.0632	0.0646	0.0409	0.0432	0.01	0.0141
572	1201674	SMAD3	6769	positive regulation of transcription, DNA-templated	GO:0045893	biological process	111	49	0.0639	0.042	0.0123	0.88	0.00668	0.0632	0.0646	0.0409	0.0432	0.0109	0.014
573	1201674	SMAD3	6769	positive regulation of transcription by RNA polymerase II	GO:0045944	biological process	111	70	0.0639	0.042	0.0133	0.871	0.00752	0.0632	0.0646	0.0409	0.0432	0.0116	0.0153
574	1201674	SMAD3	6769	receptor complex	GO:0043235	cellular component	111	34	0.0639	0.042	0.0136	0.869	0.0168	0.0632	0.0646	0.0409	0.0432	0.0099	0.0185
575	1201674	SMAD3	6769	heteromeric SMAD protein complex	GO:0071144	cellular component	111	3	0.0639	0.042	0.0135	0.868	0.0133	0.0632	0.0646	0.0409	0.0432	0.0105	0.0173
576	1201674	SMAD3	6769	nodal signaling pathway	GO:0038092	biological process	111	3	0.0639	0.042	0.0139	0.866	0.00702	0.0632	0.0646	0.0409	0.0432	0.0122	0.0158
577	1201674	SMAD3	6769	positive regulation of pri-miRNA transcription by RNA polymerase II	GO:1902895	biological process	111	3	0.0639	0.042	0.0139	0.865	0.00905	0.0632	0.0646	0.0409	0.0432	0.0118	0.0164
578	1201674	SMAD3	6769	phosphatase binding	GO:0019902	molecular function	111	5	0.0639	0.042	0.0142	0.862	0.0109	0.0632	0.0646	0.0409	0.0432	0.0116	0.0174
579	1201674	SMAD3	6769	DNA-binding transcription factor activity, RNA polymerase II-specific	GO:0000981	molecular function	111	47	0.0639	0.042	0.0151	0.854	0.0126	0.0632	0.0646	0.0409	0.0432	0.0121	0.0189
580	1201674	SMAD3	6769	RNA polymerase II activating transcription factor binding	GO:0001102	molecular function	111	6	0.0639	0.042	0.0151	0.853	0.00773	0.0632	0.0646	0.0409	0.0432	0.0131	0.0174
581	1201674	SMAD3	6769	mineralocorticoid receptor binding	GO:0031962	molecular function	111	3	0.0639	0.042	0.0163	0.845	0.0126	0.0632	0.0646	0.0409	0.0432	0.0128	0.0208
582	1201674	SMAD3	6769	SMAD protein complex	GO:0071141	cellular component	111	4	0.0639	0.042	0.0172	0.837	0.00927	0.0632	0.0646	0.0409	0.0432	0.0144	0.0207
583	1201674	SMAD3	6769	activin receptor signaling pathway	GO:0032924	biological process	111	4	0.064	0.0423	0.0196	0.822	0.0033	0.0632	0.0648	0.0415	0.0431	0.0184	0.021
584	1201674	SMAD3	6769	DNA-binding transcription activator activity, RNA polymerase II-specific	GO:0001228	molecular function	111	16	0.0642	0.042	0.0172	0.838	0.0136	0.0631	0.0653	0.0409	0.0432	0.0132	0.0225
585	1201674	SMAD3	6769	RNA polymerase II cis-regulatory region sequence-specific DNA binding	GO:0000978	molecular function	111	56	0.0642	0.042	0.0182	0.832	0.0116	0.0631	0.0653	0.0409	0.0432	0.0145	0.0229
586	1201674	SMAD3	6769	regulation of transcription by RNA polymerase II	GO:0006357	biological process	111	76	0.0642	0.0422	0.018	0.832	0.0132	0.0631	0.0653	0.0411	0.0433	0.0139	0.0234
587	1201674	SMAD3	6769	BMP signaling pathway	GO:0030509	biological process	111	21	0.0643	0.0423	0.0191	0.826	0.0136	0.0638	0.0649	0.0415	0.0431	0.0146	0.025
588	1201674	SMAD3	6769	immune response	GO:0006955	biological process	111	14	0.0645	0.042	0.0205	0.817	0.00799	0.0631	0.0659	0.0409	0.0432	0.0173	0.0242
589	1201674	SMAD3	6769	glucocorticoid receptor binding	GO:0035259	molecular function	111	4	0.0645	0.042	0.0188	0.828	0.0137	0.0628	0.0663	0.0409	0.0432	0.0142	0.0248
590	1201674	SMAD3	6769	cis-regulatory region sequence-specific DNA binding	GO:0000987	molecular function	111	6	0.065	0.042	0.0208	0.815	0.013	0.0624	0.0677	0.0409	0.0432	0.0158	0.0274
591	1201674	SMAD3	6769	positive regulation of nitric oxide biosynthetic process	GO:0045429	biological process	111	6	0.0653	0.042	0.0181	0.833	0.0222	0.0622	0.0685	0.0409	0.0432	0.0116	0.0284
592	1201674	SMAD3	6769	ubiquitin protein ligase binding	GO:0031625	molecular function	111	24	0.0655	0.0423	0.0238	0.8	0.00354	0.0645	0.0666	0.0415	0.0431	0.0221	0.0257
593	1201674	SMAD3	6769	negative regulation of cytosolic calcium ion concentration	GO:0051481	biological process	111	4	0.0656	0.0423	0.0212	0.813	0.0172	0.0619	0.0695	0.0415	0.0431	0.0147	0.0305
594	1201674	SMAD3	6769	transcription regulator complex	GO:0005667	cellular component	111	14	0.0657	0.0429	0.0224	0.807	0.0112	0.0642	0.0673	0.0417	0.0442	0.0177	0.0284
595	1201674	SMAD3	6769	transcription factor binding	GO:0008134	molecular function	111	13	0.0657	0.0448	0.0229	0.804	0.0107	0.0623	0.0693	0.0405	0.0495	0.0183	0.0287
596	1201674	SMAD3	6769	DNA-binding transcription factor activity	GO:0003700	molecular function	111	23	0.066	0.0448	0.0212	0.814	0.0183	0.0616	0.0707	0.0396	0.0507	0.0145	0.0311
597	1201674	SMAD3	6769	positive regulation of epithelial to mesenchymal transition	GO:0010718	biological process	111	10	0.0663	0.0431	0.0245	0.797	0.00507	0.0649	0.0678	0.0416	0.0446	0.022	0.0274
598	1201674	SMAD3	6769	activation of cysteine-type endopeptidase activity involved in apoptotic process	GO:0006919	biological process	111	6	0.0668	0.0435	0.0215	0.812	0.0196	0.0619	0.0722	0.0413	0.0459	0.0142	0.0326
599	1201674	SMAD3	6769	extrinsic apoptotic signaling pathway	GO:0097191	biological process	111	8	0.0676	0.0432	0.0205	0.819	0.0364	0.0643	0.0712	0.0416	0.0448	0.00977	0.0428
600	1201674	SMAD3	6769	positive regulation of gene expression	GO:0010628	biological process	111	30	0.0682	0.0431	0.0242	0.799	0.0248	0.0608	0.0764	0.0408	0.0457	0.0144	0.0408
601	1201674	SMAD3	6769	transcription regulatory region sequence-specific DNA binding	GO:0000976	molecular function	111	21	0.0704	0.046	0.0302	0.773	0.0116	0.0645	0.0769	0.0407	0.0519	0.0234	0.039
602	1201674	SMAD3	6769	bHLH transcription factor binding	GO:0043425	molecular function	111	4	0.0706	0.048	0.0292	0.776	0.0194	0.0602	0.0828	0.038	0.0605	0.0194	0.0441
603	1201674	SMAD3	6769	protein kinase binding	GO:0019901	molecular function	111	38	0.0707	0.0467	0.0311	0.77	0.00266	0.0688	0.0726	0.0421	0.0518	0.0293	0.0329
604	1201674	SMAD3	6769	protein binding	GO:0005515	molecular function	111	831	0.0711	0.0472	0.0311	0.77	0.00699	0.0666	0.0759	0.0409	0.0545	0.0267	0.0363
605	1201674	SMAD3	6769	sequence-specific DNA binding	GO:0043565	molecular function	111	14	0.0714	0.0472	0.0318	0.768	0.00523	0.0678	0.0752	0.0409	0.0545	0.0283	0.0357
606	1201674	SMAD3	6769	nucleus	GO:0005634	cellular component	111	200	0.0723	0.0478	0.0326	0.765	0.00903	0.0663	0.0789	0.0403	0.0568	0.0269	0.0395
607	1201674	SMAD3	6769	nuclear inner membrane	GO:0005637	cellular component	111	5	0.0751	0.0508	0.0326	0.763	0.0316	0.0573	0.0984	0.0369	0.0699	0.0171	0.0621
608	1201674	SMAD3	6769	identical protein binding	GO:0042802	molecular function	111	79	0.0753	0.0497	0.0362	0.753	0.0105	0.0679	0.0834	0.0408	0.0606	0.0292	0.0449
609	1201674	SMAD3	6769	chromatin	GO:0000785	cellular component	111	17	0.0753	0.0492	0.0362	0.753	0.013	0.0679	0.0835	0.0459	0.0529	0.0277	0.0473
610	1201674	SMAD3	6769	protein homodimerization activity	GO:0042803	molecular function	111	34	0.076	0.0506	0.037	0.75	0.0104	0.0686	0.0843	0.0416	0.0615	0.0298	0.0458
611	1201674	SMAD3	6769	nucleoplasm	GO:0005654	cellular component	111	161	0.078	0.0513	0.0392	0.744	0.0085	0.0719	0.0846	0.0428	0.0615	0.0331	0.0464
612	1201674	SMAD3	6769	regulation of transforming growth factor beta2 production	GO:0032909	biological process	111	5	0.079	0.0527	0.0403	0.741	0.00772	0.0733	0.085	0.0455	0.0611	0.0346	0.047
613	1201674	SMAD3	6769	negative regulation of fat cell differentiation	GO:0045599	biological process	111	4	0.08	0.0563	0.0385	0.744	0.0283	0.0635	0.101	0.041	0.0773	0.0215	0.0687
614	1201674	SMAD3	6769	cell differentiation	GO:0030154	biological process	111	93	0.081	0.0533	0.0405	0.737	0.0317	0.0606	0.108	0.0364	0.0781	0.0214	0.0766
615	1201674	SMAD3	6769	SMAD protein signal transduction	GO:0060395	biological process	111	3	0.0835	0.0591	0.0397	0.74	0.0369	0.0644	0.108	0.0427	0.0819	0.0186	0.0849
616	1201674	SMAD3	6769	cytoplasm	GO:0005737	cellular component	111	202	0.0851	0.0583	0.0468	0.722	0.0142	0.0738	0.0981	0.0437	0.0776	0.0354	0.0618
617	1201674	SMAD3	6769	transcription coactivator binding	GO:0001223	molecular function	111	3	0.0871	0.0579	0.0491	0.716	0.018	0.0723	0.105	0.0428	0.0783	0.0349	0.069
618	1201674	SMAD3	6769	zinc ion binding	GO:0008270	molecular function	111	15	0.0877	0.0602	0.0507	0.713	0.00408	0.0832	0.0925	0.0503	0.0721	0.0468	0.0548
619	1201674	SMAD3	6769	cytosol	GO:0005829	cellular component	111	164	0.0909	0.0617	0.0539	0.704	0.0119	0.0796	0.104	0.0482	0.0791	0.043	0.0677
620	1201674	SMAD3	6769	cell cycle arrest	GO:0007050	biological process	111	9	0.0909	0.0665	0.0342	0.747	0.0859	0.0453	0.182	0.0278	0.159	0.00722	0.162
621	1201674	SMAD3	6769	ubiquitin binding	GO:0043130	molecular function	111	8	0.0933	0.065	0.0551	0.7	0.0246	0.0733	0.119	0.0448	0.0943	0.0344	0.0881
622	1201674	SMAD3	6769	negative regulation of cell growth	GO:0030308	biological process	111	20	0.0938	0.0649	0.0564	0.698	0.02	0.0764	0.115	0.046	0.0915	0.0385	0.0825
623	1201674	SMAD3	6769	anatomical structure morphogenesis	GO:0009653	biological process	111	94	0.105	0.076	0.0698	0.67	0.014	0.0911	0.122	0.0609	0.0948	0.0546	0.0892
624	1201674	SMAD3	6769	negative regulation of mitotic cell cycle	GO:0045930	biological process	111	15	0.11	0.0816	0.0715	0.662	0.0431	0.071	0.171	0.044	0.152	0.0326	0.157
625	1201674	SMAD3	6769	positive regulation of extracellular matrix assembly	GO:1901203	biological process	111	6	0.115	0.0856	0.0804	0.651	0.0128	0.0997	0.132	0.0712	0.103	0.0647	0.0999
626	1201674	SMAD3	6769	transforming growth factor beta receptor signaling pathway	GO:0007179	biological process	111	10	0.121	0.091	0.0866	0.639	0.0276	0.09	0.162	0.0574	0.144	0.0541	0.139
627	1201674	SMAD3	6769	SMAD protein complex assembly	GO:0007183	biological process	111	2	0.14	0.112	0.11	0.604	0.0184	0.114	0.171	0.0833	0.152	0.0819	0.147
628	1201674	SMAD3	6769	cell-cell junction organization	GO:0045216	biological process	111	10	0.156	0.128	0.128	0.579	0.0256	0.118	0.206	0.0872	0.189	0.0869	0.188
629	1336197	NXPH4	8078	signaling receptor binding	GO:0005102	molecular function	5	73	0.0777	0.0391	0.0391	0.744	0.00579	0.074	0.0816	0.0348	0.0439	0.0348	0.0439
630	105382	LAMA5	6485	cell-cell adhesion	GO:0098609	biological process	25	28	0.0862	0.242	0.045	0.724	0.0334	0.0633	0.117	0.169	0.345	0.0233	0.0869
631	105382	LAMA5	6485	integrin binding	GO:0005178	molecular function	25	13	0.102	0.242	0.0636	0.679	0.036	0.071	0.148	0.169	0.345	0.0322	0.126
632	105382	LAMA5	6485	basement membrane	GO:0005604	cellular component	25	3	0.112	0.249	0.076	0.657	0.0269	0.0834	0.149	0.183	0.34	0.047	0.123
633	105382	LAMA5	6485	cell migration	GO:0016477	biological process	25	50	0.113	0.253	0.0776	0.656	0.0156	0.0959	0.132	0.19	0.338	0.0592	0.102
634	105382	LAMA5	6485	morphogenesis of a polarized epithelium	GO:0001738	biological process	25	2	0.116	0.254	0.0631	0.671	0.0747	0.0636	0.211	0.163	0.398	0.0157	0.253
635	105382	LAMA5	6485	collagen-containing extracellular matrix	GO:0062023	cellular component	25	28	0.134	0.253	0.102	0.616	0.0116	0.119	0.151	0.19	0.338	0.085	0.123
636	105382	LAMA5	6485	axon guidance	GO:0007411	biological process	25	36	0.153	0.266	0.123	0.584	0.0366	0.104	0.226	0.181	0.391	0.0725	0.207
637	105382	LAMA5	6485	extracellular exosome	GO:0070062	cellular component	25	162	0.169	0.266	0.142	0.563	0.0188	0.138	0.206	0.181	0.391	0.109	0.187
638	105382	LAMA5	6485	integrin-mediated signaling pathway	GO:0007229	biological process	25	4	0.201	0.291	0.179	0.521	0.026	0.153	0.264	0.194	0.436	0.128	0.25
639	105382	LAMA5	6485	extracellular space	GO:0005615	cellular component	25	54	0.218	0.295	0.198	0.504	0.00606	0.203	0.233	0.219	0.397	0.184	0.214
640	105382	LAMA5	6485	substrate adhesion-dependent cell spreading	GO:0034446	biological process	25	3	0.227	0.291	0.206	0.492	0.0394	0.152	0.34	0.194	0.436	0.128	0.334
641	105382	LAMA5	6485	tissue development	GO:0009888	biological process	25	31	0.241	0.294	0.217	0.475	0.0647	0.127	0.458	0.196	0.44	0.1	0.468
642	105382	LAMA5	6485	animal organ morphogenesis	GO:0009887	biological process	25	35	0.259	0.308	0.242	0.461	0.035	0.182	0.369	0.204	0.464	0.159	0.368
643	105382	LAMA5	6485	nucleus	GO:0005634	cellular component	25	200	0.269	0.324	0.255	0.453	0.0239	0.212	0.343	0.25	0.42	0.193	0.336
644	105382	LAMA5	6485	laminin-5 complex	GO:0005610	cellular component	25	2	0.304	0.318	0.288	0.42	0.0489	0.189	0.489	0.207	0.488	0.167	0.497
645	105382	LAMA5	6485	laminin-10 complex	GO:0043259	cellular component	25	2	0.306	0.318	0.29	0.418	0.0477	0.192	0.487	0.207	0.488	0.171	0.494
646	105382	LAMA5	6485	extracellular matrix structural constituent	GO:0005201	molecular function	25	8	0.402	0.397	0.396	0.349	0.0263	0.32	0.506	0.311	0.508	0.31	0.505
647	1916168	C16orf74	23362	protein binding	GO:0005515	molecular function	2	831	0.0775	0.0348	0.0348	0.755	0.0357	0.0584	0.103	0.0169	0.0713	0.0169	0.0713
648	1913464	RGCC	20369	positive regulation of cyclin-dependent protein serine/threonine kinase activity	GO:0045737	biological process	38	7	0.0639	0.101	0.0114	0.888	0.0137	0.0632	0.0646	0.0922	0.111	0.00868	0.015
649	1913464	RGCC	20369	negative regulation of fibroblast growth factor production	GO:0090272	biological process	38	3	0.0639	0.101	0.0126	0.877	0.0153	0.0632	0.0646	0.0922	0.111	0.00944	0.0168
650	1913464	RGCC	20369	positive regulation of G1/S transition of mitotic cell cycle	GO:1900087	biological process	38	5	0.0639	0.101	0.0153	0.853	0.0142	0.0632	0.0646	0.0922	0.111	0.0117	0.02
651	1913464	RGCC	20369	mitotic cell cycle arrest	GO:0071850	biological process	38	6	0.0642	0.101	0.0165	0.844	0.0209	0.0631	0.0653	0.0922	0.111	0.0111	0.0246
652	1913464	RGCC	20369	protein kinase activator activity	GO:0030295	molecular function	38	9	0.0666	0.101	0.0246	0.796	0.00823	0.0642	0.0691	0.0922	0.111	0.0206	0.0293
653	1913464	RGCC	20369	positive regulation of cytokine production	GO:0001819	biological process	38	58	0.0683	0.101	0.0221	0.81	0.0259	0.0606	0.0771	0.0922	0.111	0.0128	0.0381
654	1913464	RGCC	20369	negative regulation of mitotic cell cycle phase transition	GO:1901991	biological process	38	8	0.0707	0.101	0.0292	0.777	0.0169	0.0623	0.0803	0.0922	0.111	0.0204	0.0417
655	1913464	RGCC	20369	negative regulation of cytokine production	GO:0001818	biological process	38	53	0.0755	0.101	0.0354	0.755	0.018	0.0645	0.0883	0.0922	0.111	0.0244	0.0512
656	1913464	RGCC	20369	positive regulation of extracellular matrix assembly	GO:1901203	biological process	38	6	0.0777	0.101	0.039	0.744	0.0126	0.0697	0.0867	0.0922	0.111	0.03	0.0507
657	1913464	RGCC	20369	negative regulation of exit from mitosis	GO:0001100	biological process	38	4	0.0813	0.101	0.0434	0.732	0.00525	0.0768	0.0861	0.0922	0.111	0.0391	0.0481
658	1913464	RGCC	20369	protein kinase binding	GO:0019901	molecular function	38	38	0.0825	0.101	0.0441	0.729	0.0138	0.0733	0.0928	0.0922	0.111	0.0334	0.0581
659	1913464	RGCC	20369	positive regulation of DNA-binding transcription factor activity	GO:0051091	biological process	38	12	0.0851	0.105	0.0453	0.724	0.0295	0.0645	0.112	0.0933	0.119	0.0256	0.0801
660	1913464	RGCC	20369	negative regulation of cell population proliferation	GO:0008285	biological process	38	45	0.0867	0.105	0.0471	0.72	0.0274	0.0658	0.114	0.0893	0.125	0.0281	0.079
661	1913464	RGCC	20369	positive regulation of collagen biosynthetic process	GO:0032967	biological process	38	5	0.0889	0.106	0.0481	0.716	0.0353	0.063	0.125	0.0891	0.126	0.0245	0.0943
662	1913464	RGCC	20369	R-SMAD binding	GO:0070412	molecular function	38	4	0.0891	0.104	0.0518	0.71	0.0083	0.082	0.0967	0.0982	0.11	0.0441	0.0609
663	1913464	RGCC	20369	positive regulation of gene expression	GO:0010628	biological process	38	30	0.0896	0.108	0.0516	0.71	0.0186	0.0744	0.108	0.101	0.114	0.0361	0.0739
664	1913464	RGCC	20369	complement activation	GO:0006956	biological process	38	8	0.0901	0.106	0.0508	0.709	0.0323	0.066	0.123	0.0931	0.12	0.0276	0.0936
665	1913464	RGCC	20369	positive regulation of stress fiber assembly	GO:0051496	biological process	38	6	0.0906	0.104	0.0536	0.706	0.00274	0.087	0.0943	0.0982	0.11	0.0509	0.0565
666	1913464	RGCC	20369	positive regulation of extracellular matrix constituent secretion	GO:0003331	biological process	38	4	0.092	0.105	0.0546	0.702	0.0167	0.0783	0.108	0.0933	0.119	0.0401	0.0742
667	1913464	RGCC	20369	negative regulation of endothelial cell proliferation	GO:0001937	biological process	38	7	0.0928	0.105	0.055	0.701	0.0219	0.0742	0.116	0.0893	0.125	0.0367	0.0823
668	1913464	RGCC	20369	negative regulation of blood vessel endothelial cell migration	GO:0043537	biological process	38	5	0.093	0.107	0.0543	0.701	0.0312	0.0673	0.129	0.088	0.13	0.0309	0.0956
669	1913464	RGCC	20369	positive regulation of mitotic nuclear division	GO:0045840	biological process	38	7	0.101	0.115	0.0639	0.681	0.028	0.0751	0.135	0.0966	0.137	0.0392	0.104
670	1913464	RGCC	20369	cellular response to hypoxia	GO:0071456	biological process	38	11	0.104	0.115	0.0683	0.674	0.00277	0.0999	0.107	0.108	0.123	0.0651	0.0717
671	1913464	RGCC	20369	positive regulation of transcription by RNA polymerase II	GO:0045944	biological process	38	70	0.11	0.119	0.0756	0.66	0.008	0.101	0.12	0.11	0.129	0.0659	0.0868
672	1913464	RGCC	20369	positive regulation of endothelial cell apoptotic process	GO:2000353	biological process	38	4	0.117	0.121	0.0827	0.647	0.0172	0.0967	0.141	0.103	0.143	0.0622	0.11
673	1913464	RGCC	20369	positive regulation of cell cycle arrest	GO:0071158	biological process	38	5	0.13	0.129	0.0977	0.623	0.00675	0.122	0.138	0.123	0.136	0.0874	0.109
674	1913464	RGCC	20369	centrosome	GO:0005813	cellular component	38	32	0.131	0.132	0.0993	0.62	0.0181	0.109	0.158	0.109	0.159	0.0746	0.132
675	1913464	RGCC	20369	positive regulation of epithelial to mesenchymal transition	GO:0010718	biological process	38	10	0.143	0.142	0.114	0.6	0.016	0.121	0.17	0.112	0.181	0.0892	0.145
676	1913464	RGCC	20369	negative regulation of angiogenesis	GO:0016525	biological process	38	9	0.147	0.148	0.115	0.594	0.0381	0.0977	0.22	0.098	0.223	0.0659	0.2
677	1913464	RGCC	20369	negative regulation of cell-cell adhesion mediated by cadherin	GO:2000048	biological process	38	3	0.192	0.199	0.17	0.532	0.00243	0.188	0.197	0.193	0.205	0.165	0.176
678	1913464	RGCC	20369	nucleus	GO:0005634	cellular component	38	200	0.202	0.209	0.182	0.521	0.00432	0.193	0.212	0.198	0.219	0.171	0.192
679	1913464	RGCC	20369	protein binding	GO:0005515	molecular function	38	831	0.231	0.229	0.214	0.49	0.00481	0.22	0.243	0.224	0.234	0.201	0.226
680	1913464	RGCC	20369	cytoplasm	GO:0005737	cellular component	38	202	0.233	0.228	0.215	0.488	0.00853	0.214	0.253	0.214	0.242	0.194	0.239
681	1913464	RGCC	20369	nucleoplasm	GO:0005654	cellular component	38	161	0.237	0.23	0.22	0.484	0.00491	0.226	0.248	0.218	0.242	0.207	0.233
682	1913464	RGCC	20369	nucleolus	GO:0005730	cellular component	38	26	0.252	0.236	0.236	0.47	0.00242	0.246	0.257	0.229	0.243	0.229	0.243
683	102709	CAV1	1527	signaling receptor binding	GO:0005102	molecular function	100	73	0.0639	0.0643	0.00475	0.905	0.0396	0.0632	0.0646	0.0346	0.12	0.000558	0.0405
684	102709	CAV1	1527	nitric-oxide synthase binding	GO:0050998	molecular function	100	3	0.0639	0.0798	0.0102	0.899	0.0194	0.0632	0.0646	0.0569	0.112	0.00677	0.0154
685	102709	CAV1	1527	caveola	GO:0005901	cellular component	100	3	0.0639	0.0798	0.0107	0.897	0.00535	0.0632	0.0646	0.0569	0.112	0.00954	0.0121
686	102709	CAV1	1527	apoptotic signaling pathway	GO:0097190	biological process	100	8	0.0639	0.0798	0.00901	0.895	0.0262	0.0632	0.0646	0.0569	0.112	0.00373	0.0218
687	102709	CAV1	1527	caveola assembly	GO:0070836	biological process	100	2	0.0639	0.0798	0.0118	0.883	0.0143	0.0632	0.0646	0.0569	0.112	0.00876	0.016
688	102709	CAV1	1527	receptor internalization involved in canonical Wnt signaling pathway	GO:2000286	biological process	100	2	0.0639	0.0798	0.0131	0.871	0.0188	0.0632	0.0646	0.0569	0.112	0.00898	0.019
689	102709	CAV1	1527	sarcolemma	GO:0042383	cellular component	100	5	0.0639	0.0798	0.0146	0.859	0.012	0.0632	0.0646	0.0569	0.112	0.0117	0.0183
690	102709	CAV1	1527	membrane raft	GO:0045121	cellular component	100	17	0.0642	0.0826	0.0171	0.84	0.0171	0.0631	0.0653	0.0598	0.114	0.0123	0.0237
691	102709	CAV1	1527	negative regulation of peptidyl-tyrosine autophosphorylation	GO:1900085	biological process	100	4	0.0642	0.0798	0.0164	0.844	0.0175	0.0642	0.0643	0.0569	0.112	0.0117	0.0232
692	102709	CAV1	1527	positive regulation of ER-associated ubiquitin-dependent protein catabolic process	GO:1903071	biological process	100	4	0.0646	0.0829	0.0161	0.845	0.032	0.0628	0.0664	0.0601	0.114	0.00831	0.0312
693	102709	CAV1	1527	positive regulation of cell migration	GO:0030335	biological process	100	37	0.0647	0.0798	0.02	0.82	0.0131	0.0632	0.0662	0.0569	0.112	0.0153	0.0261
694	102709	CAV1	1527	regulation of cytosolic calcium ion concentration	GO:0051480	biological process	100	11	0.0648	0.081	0.0197	0.822	0.0145	0.0626	0.0671	0.0582	0.113	0.0146	0.0266
695	102709	CAV1	1527	positive regulation of NF-kappaB transcription factor activity	GO:0051092	biological process	100	5	0.0648	0.08	0.0147	0.854	0.0328	0.0637	0.066	0.0567	0.113	0.00729	0.0296
696	102709	CAV1	1527	ion channel binding	GO:0044325	molecular function	100	10	0.0656	0.0798	0.0182	0.833	0.0257	0.0619	0.0695	0.0569	0.112	0.0108	0.0305
697	102709	CAV1	1527	positive regulation of cholesterol efflux	GO:0010875	biological process	100	5	0.0664	0.0808	0.0151	0.856	0.0356	0.0622	0.0708	0.0562	0.116	0.00738	0.0311
698	102709	CAV1	1527	negative regulation of protein tyrosine kinase activity	GO:0061099	biological process	100	7	0.0678	0.0825	0.0216	0.812	0.024	0.061	0.0752	0.0551	0.124	0.013	0.0359
699	102709	CAV1	1527	negative regulation of anoikis	GO:2000811	biological process	100	3	0.0687	0.0825	0.0137	0.858	0.0491	0.0603	0.0783	0.0551	0.124	0.00441	0.0423
700	102709	CAV1	1527	inward rectifier potassium channel inhibitor activity	GO:0070320	molecular function	100	2	0.0689	0.0808	0.0235	0.803	0.0301	0.0642	0.0738	0.0562	0.116	0.0128	0.0433
701	102709	CAV1	1527	cellular response to exogenous dsRNA	GO:0071360	biological process	100	4	0.069	0.0853	0.028	0.782	0.0095	0.0645	0.0738	0.0608	0.12	0.0227	0.0346
702	102709	CAV1	1527	positive regulation of extrinsic apoptotic signaling pathway	GO:2001238	biological process	100	5	0.0709	0.0858	0.0227	0.808	0.0418	0.0609	0.0825	0.0584	0.126	0.00976	0.0528
703	102709	CAV1	1527	focal adhesion	GO:0005925	cellular component	100	30	0.0734	0.0899	0.0334	0.761	0.0195	0.063	0.0856	0.0721	0.112	0.0221	0.0503
704	102709	CAV1	1527	caveolin-mediated endocytosis	GO:0072584	biological process	100	3	0.0758	0.0926	0.0343	0.758	0.0221	0.0649	0.0885	0.0629	0.136	0.0216	0.0546
705	102709	CAV1	1527	positive regulation of peptidyl-serine phosphorylation	GO:0033138	biological process	100	9	0.0763	0.0889	0.0365	0.751	0.0196	0.0635	0.0917	0.0589	0.134	0.0244	0.0544
706	102709	CAV1	1527	negative regulation of pinocytosis	GO:0048550	biological process	100	4	0.0764	0.09	0.0286	0.781	0.0441	0.0627	0.0929	0.0597	0.136	0.0118	0.0693
707	102709	CAV1	1527	regulation of membrane repolarization during action potential	GO:0098903	biological process	100	4	0.0785	0.092	0.0359	0.752	0.0319	0.063	0.0977	0.068	0.124	0.0185	0.0694
708	102709	CAV1	1527	positive regulation of toll-like receptor 3 signaling pathway	GO:0034141	biological process	100	4	0.0799	0.088	0.0391	0.741	0.0308	0.0599	0.107	0.0572	0.135	0.0213	0.0718
709	102709	CAV1	1527	enzyme binding	GO:0019899	molecular function	100	49	0.0809	0.0919	0.0421	0.735	0.0156	0.0697	0.094	0.0639	0.132	0.0309	0.0575
710	102709	CAV1	1527	positive regulation of intrinsic apoptotic signaling pathway	GO:2001244	biological process	100	12	0.0822	0.095	0.0308	0.771	0.0582	0.0629	0.107	0.0621	0.145	0.0095	0.0996
711	102709	CAV1	1527	regulation of blood coagulation	GO:0030193	biological process	100	12	0.0838	0.0943	0.0435	0.73	0.0253	0.067	0.105	0.0624	0.143	0.0259	0.0731
712	102709	CAV1	1527	endosome	GO:0005768	cellular component	100	27	0.0861	0.095	0.0463	0.722	0.0271	0.0671	0.111	0.0621	0.145	0.027	0.0796
713	102709	CAV1	1527	negative regulation of protein ubiquitination	GO:0031397	biological process	100	9	0.0874	0.0973	0.0461	0.721	0.0351	0.0633	0.121	0.0613	0.154	0.0232	0.0916
714	102709	CAV1	1527	small GTPase binding	GO:0031267	molecular function	100	13	0.0877	0.0993	0.0503	0.713	0.00866	0.0803	0.0959	0.0765	0.129	0.0425	0.0596
715	102709	CAV1	1527	regulation of ruffle assembly	GO:1900027	biological process	100	4	0.0908	0.0973	0.0496	0.712	0.0354	0.0655	0.126	0.0613	0.154	0.0248	0.0991
716	102709	CAV1	1527	cellular response to hyperoxia	GO:0071455	biological process	100	4	0.0915	0.0946	0.0471	0.713	0.057	0.053	0.158	0.0553	0.162	0.0167	0.133
717	102709	CAV1	1527	positive regulation of cell adhesion molecule production	GO:0060355	biological process	100	4	0.0927	0.0977	0.0495	0.711	0.0441	0.0628	0.137	0.0611	0.156	0.0209	0.117
718	102709	CAV1	1527	negative regulation of inward rectifier potassium channel activity	GO:1903609	biological process	100	3	0.0963	0.104	0.06	0.691	0.00319	0.0937	0.099	0.0811	0.133	0.0566	0.0637
719	102709	CAV1	1527	positive regulation of protein binding	GO:0032092	biological process	100	12	0.0968	0.0979	0.0573	0.693	0.0379	0.0657	0.143	0.061	0.157	0.0285	0.115
720	102709	CAV1	1527	integral component of plasma membrane	GO:0005887	cellular component	100	76	0.097	0.103	0.0608	0.689	0.0129	0.0841	0.112	0.0753	0.141	0.0479	0.0771
721	102709	CAV1	1527	negative regulation of peptidyl-serine phosphorylation	GO:0033137	biological process	100	5	0.0978	0.0977	0.0588	0.69	0.0342	0.0689	0.139	0.0611	0.156	0.0313	0.111
722	102709	CAV1	1527	T cell costimulation	GO:0031295	biological process	100	4	0.0986	0.106	0.0627	0.685	0.0108	0.0878	0.111	0.0795	0.141	0.0517	0.076
723	102709	CAV1	1527	negative regulation of potassium ion transmembrane transport	GO:1901380	biological process	100	7	0.0991	0.111	0.0603	0.687	0.0355	0.0702	0.14	0.0841	0.145	0.0311	0.117
724	102709	CAV1	1527	receptor-mediated endocytosis of virus by host cell	GO:0019065	biological process	100	5	0.105	0.108	0.067	0.674	0.0329	0.0746	0.146	0.0682	0.172	0.0368	0.122
725	102709	CAV1	1527	negative regulation of endothelial cell proliferation	GO:0001937	biological process	100	7	0.105	0.108	0.0686	0.671	0.0269	0.0795	0.139	0.0791	0.148	0.0428	0.11
726	102709	CAV1	1527	positive regulation of protein ubiquitination	GO:0031398	biological process	100	10	0.106	0.104	0.0652	0.673	0.0487	0.065	0.172	0.061	0.176	0.027	0.157
727	102709	CAV1	1527	response to estrogen	GO:0043627	biological process	100	3	0.108	0.115	0.0717	0.664	0.0344	0.0753	0.155	0.0773	0.172	0.0399	0.129
728	102709	CAV1	1527	negative regulation of protein binding	GO:0032091	biological process	100	14	0.108	0.105	0.0673	0.668	0.052	0.0647	0.181	0.0612	0.179	0.0265	0.171
729	102709	CAV1	1527	Golgi apparatus	GO:0005794	cellular component	100	55	0.111	0.111	0.0767	0.658	0.0123	0.0969	0.128	0.0818	0.15	0.0621	0.0947
730	102709	CAV1	1527	regulation of entry of bacterium into host cell	GO:2000535	biological process	100	3	0.117	0.117	0.0825	0.647	0.0179	0.0956	0.142	0.0843	0.163	0.0606	0.112
731	102709	CAV1	1527	protein kinase binding	GO:0019901	molecular function	100	38	0.118	0.116	0.084	0.644	0.0248	0.0903	0.155	0.0804	0.167	0.055	0.128
732	102709	CAV1	1527	receptor internalization	GO:0031623	biological process	100	13	0.119	0.117	0.0752	0.649	0.0622	0.0663	0.215	0.0644	0.212	0.024	0.236
733	102709	CAV1	1527	plasma membrane	GO:0005886	cellular component	100	175	0.123	0.123	0.0903	0.635	0.00584	0.114	0.132	0.102	0.148	0.0818	0.0997
734	102709	CAV1	1527	Golgi membrane	GO:0000139	cellular component	100	12	0.126	0.125	0.093	0.63	0.0184	0.103	0.153	0.0909	0.171	0.0686	0.126
735	102709	CAV1	1527	cytoplasmic vesicle	GO:0031410	cellular component	100	47	0.126	0.12	0.09	0.63	0.0439	0.0791	0.2	0.0726	0.199	0.0423	0.191
736	102709	CAV1	1527	ATPase binding	GO:0051117	molecular function	100	11	0.128	0.13	0.0944	0.627	0.0213	0.102	0.16	0.108	0.157	0.0668	0.134
737	102709	CAV1	1527	perinuclear region of cytoplasm	GO:0048471	cellular component	100	35	0.13	0.124	0.0957	0.622	0.0371	0.0872	0.192	0.0788	0.194	0.0513	0.179
738	102709	CAV1	1527	protein-containing complex binding	GO:0044877	molecular function	100	86	0.13	0.127	0.0985	0.622	0.00834	0.118	0.144	0.105	0.154	0.086	0.113
739	102709	CAV1	1527	positive regulation of canonical Wnt signaling pathway	GO:0090263	biological process	100	9	0.132	0.127	0.0987	0.619	0.0324	0.0945	0.185	0.0941	0.17	0.0585	0.166
740	102709	CAV1	1527	identical protein binding	GO:0042802	molecular function	100	79	0.143	0.139	0.113	0.6	0.0129	0.125	0.163	0.12	0.162	0.0933	0.137
741	102709	CAV1	1527	response to progesterone	GO:0032570	biological process	100	4	0.144	0.14	0.115	0.599	0.00602	0.134	0.154	0.12	0.162	0.105	0.126
742	102709	CAV1	1527	membrane	GO:0016020	cellular component	100	157	0.157	0.148	0.13	0.578	0.00778	0.145	0.17	0.13	0.169	0.116	0.146
743	102709	CAV1	1527	negative regulation of transforming growth factor beta receptor signaling pathway	GO:0030512	biological process	100	6	0.168	0.158	0.139	0.563	0.0403	0.109	0.257	0.0979	0.256	0.078	0.247
744	102709	CAV1	1527	protein binding	GO:0005515	molecular function	100	831	0.186	0.176	0.163	0.54	0.00374	0.179	0.193	0.171	0.181	0.155	0.172
745	102709	CAV1	1527	endoplasmic reticulum	GO:0005783	cellular component	100	62	0.19	0.18	0.167	0.535	0.0167	0.159	0.227	0.143	0.225	0.133	0.209
746	102709	CAV1	1527	response to bacterium	GO:0009617	biological process	100	8	0.234	0.227	0.215	0.487	0.0235	0.183	0.298	0.17	0.301	0.16	0.289
747	102709	CAV1	1527	molecular adaptor activity	GO:0060090	molecular function	100	12	0.332	0.327	0.321	0.4	0.0332	0.242	0.455	0.233	0.46	0.226	0.456
748	102709	CAV1	1527	protein-containing complex	GO:0032991	cellular component	100	373	0.392	0.391	0.385	0.357	0.0227	0.322	0.476	0.324	0.472	0.314	0.472
749	102709	CAV1	1527	cell differentiation	GO:0030154	biological process	100	93	0.485	0.485	0.48	0.292	0.0406	0.349	0.673	0.351	0.669	0.341	0.675
750	2442252	LRP4	6696	negative regulation of canonical Wnt signaling pathway	GO:0090090	biological process	9	21	0.186	0.457	0.156	0.539	0.0535	0.107	0.324	0.317	0.658	0.0735	0.33
751	2442252	LRP4	6696	negative regulation of ossification	GO:0030279	biological process	9	4	0.206	0.457	0.18	0.515	0.0494	0.123	0.346	0.317	0.658	0.0918	0.354
752	2442252	LRP4	6696	cell surface	GO:0009986	cellular component	9	30	0.255	0.457	0.239	0.466	0.0283	0.192	0.338	0.317	0.658	0.173	0.33
753	2442252	LRP4	6696	limb development	GO:0060173	biological process	9	5	0.286	0.457	0.27	0.436	0.0427	0.187	0.438	0.317	0.658	0.164	0.444
754	2442252	LRP4	6696	protein binding	GO:0005515	molecular function	9	831	0.312	0.465	0.299	0.414	0.0421	0.212	0.459	0.314	0.69	0.197	0.455
755	2442252	LRP4	6696	amyloid-beta clearance by cellular catabolic process	GO:0150094	biological process	9	3	0.502	0.536	0.496	0.271	0.0682	0.309	0.816	0.354	0.811	0.301	0.819
756	2442252	LRP4	6696	kidney development	GO:0001822	biological process	9	6	0.511	0.534	0.507	0.276	0.0371	0.385	0.678	0.366	0.778	0.379	0.678
757	1929657	HACL1	17856	phytanic acid metabolic process	GO:1903512	biological process	16	3	0.0639	0.178	0.0165	0.843	0.00551	0.0632	0.0646	0.147	0.215	0.0149	0.0184
758	1929657	HACL1	17856	fatty acid metabolic process	GO:0006631	biological process	16	20	0.0771	0.178	0.0385	0.746	0.00446	0.074	0.0803	0.147	0.215	0.0351	0.0422
759	1929657	HACL1	17856	methyl-branched fatty acid metabolic process	GO:0097089	biological process	16	5	0.0788	0.178	0.0382	0.745	0.0215	0.0662	0.0939	0.147	0.215	0.0244	0.06
760	1929657	HACL1	17856	thiamine pyrophosphate binding	GO:0030976	molecular function	16	7	0.1	0.178	0.0638	0.682	0.018	0.0839	0.12	0.147	0.216	0.0463	0.0879
761	1929657	HACL1	17856	peroxisome	GO:0005777	cellular component	16	18	0.13	0.208	0.0987	0.621	0.012	0.114	0.149	0.15	0.287	0.081	0.12
762	1929657	HACL1	17856	fatty acid alpha-oxidation	GO:0001561	biological process	16	3	0.136	0.208	0.105	0.612	0.00154	0.135	0.137	0.15	0.287	0.103	0.108
763	1929657	HACL1	17856	intracellular membrane-bounded organelle	GO:0043231	cellular component	16	80	0.144	0.212	0.115	0.598	0.0132	0.125	0.167	0.15	0.299	0.0936	0.141
764	1929657	HACL1	17856	protein targeting to peroxisome	GO:0006625	biological process	16	6	0.16	0.218	0.133	0.574	0.0181	0.131	0.194	0.149	0.319	0.102	0.173
765	1929657	HACL1	17856	identical protein binding	GO:0042802	molecular function	16	79	0.229	0.307	0.211	0.492	0.0111	0.205	0.256	0.272	0.347	0.184	0.243
766	1929657	HACL1	17856	ATP binding	GO:0005524	molecular function	16	17	0.231	0.27	0.208	0.487	0.0512	0.136	0.393	0.149	0.488	0.107	0.404
767	1929657	HACL1	17856	magnesium ion binding	GO:0000287	molecular function	16	10	0.236	0.27	0.209	0.481	0.0661	0.12	0.464	0.149	0.488	0.0888	0.49
768	1929657	HACL1	17856	protein binding	GO:0005515	molecular function	16	831	0.321	0.371	0.311	0.41	0.0109	0.29	0.355	0.327	0.421	0.278	0.348
769	1929657	HACL1	17856	nucleoplasm	GO:0005654	cellular component	16	161	0.353	0.375	0.345	0.385	0.01	0.323	0.387	0.336	0.417	0.313	0.381
770	1929657	HACL1	17856	carbon-carbon lyase activity	GO:0016830	molecular function	16	17	0.456	0.452	0.452	0.314	0.0122	0.413	0.503	0.408	0.5	0.408	0.5
771	104328	RHBDF1	20561	negative regulation of protein secretion	GO:0050709	biological process	10	17	0.0767	0.177	0.0351	0.754	0.0307	0.0582	0.101	0.144	0.218	0.0189	0.0651
772	104328	RHBDF1	20561	regulation of protein secretion	GO:0050708	biological process	10	16	0.0823	0.177	0.0446	0.728	0.00645	0.0772	0.0878	0.144	0.218	0.0393	0.0507
773	104328	RHBDF1	20561	cell migration	GO:0016477	biological process	10	50	0.106	0.177	0.0705	0.67	0.0045	0.0999	0.111	0.144	0.218	0.0652	0.0762
774	104328	RHBDF1	20561	Golgi membrane	GO:0000139	cellular component	10	12	0.13	0.183	0.0982	0.621	0.0208	0.104	0.164	0.139	0.241	0.0698	0.138
775	104328	RHBDF1	20561	regulation of proteasomal protein catabolic process	GO:0061136	biological process	10	7	0.136	0.214	0.102	0.612	0.0347	0.0953	0.194	0.161	0.283	0.0579	0.181
776	104328	RHBDF1	20561	endoplasmic reticulum membrane	GO:0005789	cellular component	10	22	0.197	0.238	0.175	0.528	0.0117	0.174	0.222	0.203	0.279	0.15	0.204
777	104328	RHBDF1	20561	regulation of epidermal growth factor receptor signaling pathway	GO:0042058	biological process	10	5	0.201	0.239	0.176	0.522	0.037	0.137	0.296	0.16	0.358	0.107	0.292
778	104328	RHBDF1	20561	protein binding	GO:0005515	molecular function	10	831	0.335	0.353	0.326	0.398	0.0201	0.279	0.404	0.309	0.402	0.267	0.398
779	104328	RHBDF1	20561	cell population proliferation	GO:0008283	biological process	10	35	0.406	0.415	0.399	0.344	0.0409	0.291	0.568	0.3	0.574	0.281	0.566
780	106916	MSRA	7377	cellular response to oxidative stress	GO:0034599	biological process	12	9	0.121	0.216	0.0852	0.639	0.0375	0.0822	0.179	0.149	0.313	0.0464	0.157
781	106916	MSRA	7377	extracellular exosome	GO:0070062	cellular component	12	162	0.142	0.216	0.111	0.602	0.022	0.113	0.178	0.149	0.313	0.0795	0.155
782	106916	MSRA	7377	plasma membrane	GO:0005886	cellular component	12	175	0.144	0.216	0.112	0.599	0.0297	0.106	0.196	0.149	0.313	0.0721	0.175
783	106916	MSRA	7377	peptide-methionine (S)-S-oxide reductase activity	GO:0008113	molecular function	12	2	0.146	0.235	0.0977	0.601	0.086	0.0622	0.341	0.154	0.358	0.0244	0.391
784	106916	MSRA	7377	actin cytoskeleton	GO:0015629	cellular component	12	18	0.153	0.216	0.125	0.586	0.00697	0.142	0.164	0.149	0.313	0.113	0.138
785	106916	MSRA	7377	L-methionine-(S)-S-oxide reductase activity	GO:0036456	molecular function	12	2	0.173	0.224	0.141	0.557	0.0491	0.104	0.288	0.152	0.329	0.0679	0.294
786	106916	MSRA	7377	protein binding	GO:0005515	molecular function	12	831	0.195	0.216	0.17	0.529	0.0349	0.136	0.28	0.149	0.313	0.108	0.268
787	106916	MSRA	7377	cytosol	GO:0005829	cellular component	12	164	0.2	0.216	0.177	0.523	0.0311	0.145	0.275	0.149	0.313	0.119	0.262
788	106916	MSRA	7377	cytoplasm	GO:0005737	cellular component	12	202	0.203	0.216	0.18	0.519	0.0303	0.148	0.278	0.149	0.313	0.123	0.265
789	106916	MSRA	7377	nucleoplasm	GO:0005654	cellular component	12	161	0.237	0.234	0.217	0.483	0.0349	0.167	0.335	0.163	0.337	0.145	0.327
790	2146854	FAM234A	14163	extracellular exosome	GO:0070062	cellular component	2	162	0.153	0.178	0.125	0.585	0.00551	0.145	0.161	0.168	0.189	0.115	0.136
791	2146854	FAM234A	14163	cell surface	GO:0009986	cellular component	2	30	0.199	0.178	0.178	0.524	0.00443	0.19	0.209	0.168	0.189	0.168	0.189
792	104564	CDKN1C	1786	positive regulation of transforming growth factor beta receptor signaling pathway	GO:0030511	biological process	18	5	0.0639	0.0298	0.00821	0.919	0.011	0.0632	0.0646	0.0254	0.0349	0.0058	0.0116
793	104564	CDKN1C	1786	negative regulation of cyclin-dependent protein kinase activity	GO:1904030	biological process	18	4	0.0639	0.0298	0.00959	0.909	0.0033	0.0632	0.0646	0.0254	0.0349	0.00883	0.0104
794	104564	CDKN1C	1786	positive regulation of transcription, DNA-templated	GO:0045893	biological process	18	49	0.0639	0.0298	0.0115	0.888	0.0103	0.0632	0.0646	0.0254	0.0349	0.00924	0.0142
795	104564	CDKN1C	1786	negative regulation of transcription, DNA-templated	GO:0045892	biological process	18	44	0.0639	0.0298	0.0119	0.884	0.00948	0.0632	0.0646	0.0254	0.0349	0.00983	0.0144
796	104564	CDKN1C	1786	protein kinase inhibitor activity	GO:0004860	molecular function	18	6	0.0639	0.0298	0.0118	0.883	0.0223	0.0632	0.0646	0.0254	0.0349	0.00741	0.0186
797	104564	CDKN1C	1786	negative regulation of epithelial cell proliferation	GO:0050680	biological process	18	17	0.0639	0.0298	0.0129	0.872	0.0236	0.0632	0.0646	0.0254	0.0349	0.00798	0.021
798	104564	CDKN1C	1786	negative regulation of cyclin-dependent protein serine/threonine kinase activity	GO:0045736	biological process	18	6	0.0639	0.0298	0.0146	0.859	0.0119	0.0632	0.0646	0.0254	0.0349	0.0118	0.0181
799	104564	CDKN1C	1786	negative regulation of kinase activity	GO:0033673	biological process	18	9	0.0645	0.034	0.0194	0.824	0.0123	0.0628	0.0663	0.0296	0.0391	0.015	0.0249
800	104564	CDKN1C	1786	negative regulation of phosphorylation	GO:0042326	biological process	18	7	0.0648	0.034	0.0217	0.81	0.00613	0.0631	0.0664	0.0296	0.0391	0.0191	0.0246
801	104564	CDKN1C	1786	negative regulation of mitotic cell cycle	GO:0045930	biological process	18	15	0.08	0.0554	0.0408	0.738	0.0171	0.0686	0.0934	0.04	0.0766	0.0286	0.0582
802	104564	CDKN1C	1786	nucleus	GO:0005634	cellular component	18	200	0.0936	0.0742	0.0565	0.698	0.0177	0.0785	0.112	0.0563	0.0979	0.0404	0.0791
803	104564	CDKN1C	1786	cytoplasm	GO:0005737	cellular component	18	202	0.123	0.0985	0.0904	0.634	0.0129	0.107	0.141	0.0815	0.119	0.0731	0.112
804	104564	CDKN1C	1786	protein binding	GO:0005515	molecular function	18	831	0.129	0.102	0.0968	0.624	0.0152	0.11	0.151	0.0823	0.127	0.0753	0.125
805	104564	CDKN1C	1786	protein-containing complex binding	GO:0044877	molecular function	18	86	0.15	0.126	0.12	0.59	0.0222	0.118	0.189	0.0983	0.162	0.0855	0.168
806	96763	LDHB	6541	extracellular exosome	GO:0070062	cellular component	38	162	0.0639	0.0209	0.0108	0.895	0.0095	0.0632	0.0646	0.0202	0.0216	0.0087	0.0135
807	96763	LDHB	6541	L-lactate dehydrogenase activity	GO:0004459	molecular function	38	3	0.0639	0.0209	0.0116	0.888	0.00469	0.0632	0.0646	0.0202	0.0216	0.0106	0.0127
808	96763	LDHB	6541	membrane	GO:0016020	cellular component	38	157	0.0639	0.0209	0.0124	0.879	0.0129	0.0632	0.0646	0.0202	0.0216	0.00964	0.0159
809	96763	LDHB	6541	membrane raft	GO:0045121	cellular component	38	17	0.0639	0.0209	0.0131	0.873	0.00561	0.0632	0.0646	0.0202	0.0216	0.0118	0.0145
810	96763	LDHB	6541	identical protein binding	GO:0042802	molecular function	38	79	0.0639	0.0209	0.0139	0.865	0.00456	0.0632	0.0646	0.0202	0.0216	0.0128	0.0152
811	96763	LDHB	6541	cytosol	GO:0005829	cellular component	38	164	0.0647	0.0251	0.0215	0.811	0.00845	0.0642	0.0651	0.0211	0.0298	0.0181	0.0256
812	96763	LDHB	6541	protein binding	GO:0005515	molecular function	38	831	0.0683	0.0275	0.0275	0.784	0.00475	0.0663	0.0704	0.0248	0.0305	0.0248	0.0305
813	1913101	CLDN10	2033	regulation of ion transport	GO:0043269	biological process	6	10	0.064	0.0864	0.0156	0.85	0.0198	0.0632	0.0649	0.0655	0.114	0.0107	0.0229
814	1913101	CLDN10	2033	cell adhesion	GO:0007155	biological process	6	13	0.119	0.16	0.086	0.642	0.0119	0.104	0.137	0.132	0.194	0.0702	0.105
815	1913101	CLDN10	2033	bicellular tight junction	GO:0005923	cellular component	6	5	0.12	0.142	0.0806	0.643	0.0525	0.07	0.205	0.0967	0.209	0.0323	0.201
816	1913101	CLDN10	2033	bicellular tight junction assembly	GO:0070830	biological process	6	2	0.153	0.179	0.124	0.585	0.0208	0.123	0.19	0.151	0.211	0.0909	0.169
817	1913101	CLDN10	2033	plasma membrane	GO:0005886	cellular component	6	175	0.178	0.192	0.154	0.55	0.00422	0.17	0.186	0.186	0.198	0.145	0.163
818	1913101	CLDN10	2033	protein binding	GO:0005515	molecular function	6	831	0.322	0.312	0.312	0.409	0.0111	0.289	0.358	0.278	0.35	0.278	0.35
819	95634	GAD2	4093	protein binding	GO:0005515	molecular function	19	831	0.0655	0.0225	0.0225	0.807	0.0109	0.0627	0.0683	0.0179	0.0284	0.0179	0.0284
820	99403	ADORA2B	264	protein binding	GO:0005515	molecular function	14	831	0.0763	0.0374	0.0374	0.749	0.00541	0.0725	0.0804	0.0335	0.0419	0.0335	0.0419
821	1917271	NT5DC2	25717	5'-nucleotidase activity	GO:0008253	molecular function	4	4	0.0659	0.0161	0.0161	0.849	0.0335	0.0616	0.0705	0.00824	0.0316	0.00824	0.0316
822	2385247	EVA1A	25816	intracellular membrane-bounded organelle	GO:0043231	cellular component	7	80	0.0639	0.0283	0.0142	0.862	0.0152	0.0632	0.0646	0.0219	0.0365	0.0107	0.0189
823	2385247	EVA1A	25816	plasma membrane	GO:0005886	cellular component	7	175	0.0653	0.0298	0.0222	0.808	0.00969	0.0642	0.0665	0.0217	0.041	0.0181	0.0271
824	2385247	EVA1A	25816	protein binding	GO:0005515	molecular function	7	831	0.0711	0.0298	0.0298	0.775	0.0149	0.0646	0.0782	0.0217	0.041	0.0217	0.041
825	109125	TIMP4	11823	negative regulation of endopeptidase activity	GO:0010951	biological process	12	10	0.0639	0.0501	0.0088	0.917	0.00411	0.0632	0.0646	0.0404	0.0622	0.00789	0.00982
826	109125	TIMP4	11823	response to hormone	GO:0009725	biological process	12	24	0.0643	0.0501	0.0165	0.844	0.0275	0.0634	0.0652	0.0404	0.0622	0.00952	0.0285
827	109125	TIMP4	11823	response to organic substance	GO:0010033	biological process	12	56	0.0682	0.0513	0.0276	0.783	0.00676	0.0648	0.0719	0.0422	0.0623	0.0238	0.0319
828	109125	TIMP4	11823	extracellular matrix	GO:0031012	cellular component	12	21	0.0703	0.0513	0.0296	0.775	0.0159	0.0614	0.0805	0.0422	0.0623	0.0211	0.0416
829	109125	TIMP4	11823	protease binding	GO:0002020	molecular function	12	12	0.0711	0.0517	0.031	0.77	0.013	0.0638	0.0792	0.0428	0.0624	0.0234	0.0412
830	109125	TIMP4	11823	negative regulation of membrane protein ectodomain proteolysis	GO:0051045	biological process	12	7	0.0801	0.0521	0.0421	0.735	0.00137	0.0797	0.0805	0.0436	0.0623	0.041	0.0432
831	109125	TIMP4	11823	metalloendopeptidase inhibitor activity	GO:0008191	molecular function	12	5	0.0833	0.0582	0.0398	0.737	0.0432	0.0568	0.122	0.0383	0.0883	0.0172	0.0921
832	109125	TIMP4	11823	response to cytokine	GO:0034097	biological process	12	34	0.0841	0.0543	0.0461	0.724	0.0105	0.0754	0.0938	0.0419	0.0703	0.0376	0.0567
833	109125	TIMP4	11823	extracellular space	GO:0005615	cellular component	12	54	0.0958	0.062	0.0591	0.693	0.0137	0.0838	0.11	0.0463	0.083	0.0457	0.0765
834	96553	IL3RA	6012	external side of plasma membrane	GO:0009897	cellular component	8	10	0.0639	0.0114	0.00308	0.953	0.0177	0.0632	0.0646	0.00637	0.0203	0.000983	0.00965
835	96553	IL3RA	6012	cytokine binding	GO:0019955	molecular function	8	40	0.0639	0.0128	0.00338	0.959	0.0067	0.0632	0.0646	0.00866	0.0188	0.00196	0.00583
836	96553	IL3RA	6012	receptor complex	GO:0043235	cellular component	8	34	0.0642	0.0244	0.016	0.847	0.0232	0.0631	0.0653	0.0182	0.0327	0.0102	0.0252
837	96553	IL3RA	6012	cytokine-mediated signaling pathway	GO:0019221	biological process	8	44	0.0652	0.0251	0.0194	0.824	0.0172	0.0623	0.0682	0.0193	0.0327	0.0136	0.0276
838	96553	IL3RA	6012	cytokine receptor activity	GO:0004896	molecular function	8	45	0.0652	0.0255	0.0201	0.82	0.0159	0.0623	0.0682	0.0198	0.0328	0.0145	0.0279
839	96553	IL3RA	6012	protein binding	GO:0005515	molecular function	8	831	0.12	0.0873	0.0873	0.639	0.00798	0.11	0.131	0.0764	0.0998	0.0764	0.0998
840	2687329	KASH5	26520	nuclear outer membrane	GO:0005640	cellular component	21	3	0.0639	0.0268	0.00682	0.931	0.0112	0.0632	0.0646	0.0202	0.0356	0.0045	0.0103
841	2687329	KASH5	26520	homologous chromosome pairing at meiosis	GO:0007129	biological process	21	2	0.0639	0.0268	0.00935	0.911	0.00377	0.0632	0.0646	0.0202	0.0356	0.00847	0.0103
842	2687329	KASH5	26520	spindle assembly	GO:0051225	biological process	21	8	0.0639	0.0268	0.0107	0.893	0.0172	0.0632	0.0646	0.0202	0.0356	0.00712	0.0161
843	2687329	KASH5	26520	dynein complex binding	GO:0070840	molecular function	21	2	0.0639	0.0268	0.0142	0.862	0.00907	0.0632	0.0646	0.0202	0.0356	0.0121	0.0167
844	2687329	KASH5	26520	telomere localization	GO:0034397	biological process	21	6	0.0639	0.0268	0.0153	0.852	0.00929	0.0632	0.0646	0.0202	0.0356	0.0128	0.0182
845	2687329	KASH5	26520	spindle localization	GO:0051653	biological process	21	5	0.0639	0.0268	0.017	0.839	0.00563	0.0632	0.0646	0.0202	0.0356	0.0152	0.0189
846	2687329	KASH5	26520	meiotic nuclear membrane microtubule tethering complex	GO:0034993	cellular component	21	3	0.064	0.0289	0.0154	0.852	0.0199	0.0632	0.0649	0.0237	0.0352	0.0105	0.0226
847	2687329	KASH5	26520	chromosome localization to nuclear envelope involved in homologous chromosome segregation	GO:0090220	biological process	21	4	0.0665	0.0288	0.0195	0.824	0.0245	0.0621	0.0713	0.0189	0.0438	0.0118	0.0323
848	2687329	KASH5	26520	microtubule cytoskeleton organization involved in homologous chromosome segregation	GO:0090172	biological process	21	3	0.0674	0.0288	0.0212	0.815	0.026	0.0614	0.074	0.0189	0.0438	0.0124	0.0362
849	2687329	KASH5	26520	chromosome, telomeric region	GO:0000781	cellular component	21	9	0.0688	0.0288	0.0208	0.817	0.0314	0.0601	0.0787	0.0189	0.0438	0.0109	0.0398
850	2687329	KASH5	26520	meiotic spindle pole	GO:0090619	cellular component	21	2	0.0689	0.0288	0.0176	0.839	0.0408	0.0601	0.0789	0.0189	0.0438	0.00771	0.0401
851	2687329	KASH5	26520	lateral element	GO:0000800	cellular component	21	2	0.0705	0.0383	0.0302	0.773	0.0138	0.0634	0.0785	0.0346	0.0423	0.0224	0.0408
852	2687329	KASH5	26520	actin filament organization	GO:0007015	biological process	21	23	0.0722	0.0374	0.0323	0.766	0.00906	0.0668	0.0781	0.0313	0.0446	0.0266	0.0393
853	2687329	KASH5	26520	protein binding	GO:0005515	molecular function	21	831	0.131	0.0987	0.0987	0.62	0.0223	0.104	0.165	0.0694	0.14	0.0694	0.14
854	2146430	CBLB	1542	ubiquitin protein ligase activity	GO:0061630	molecular function	22	17	0.0649	0.0829	0.0206	0.817	0.015	0.0631	0.0667	0.0674	0.102	0.0153	0.0279
855	2146430	CBLB	1542	negative regulation of epidermal growth factor-activated receptor activity	GO:0007175	biological process	22	5	0.0672	0.0829	0.0203	0.82	0.0294	0.0604	0.0748	0.0674	0.102	0.0111	0.0372
856	2146430	CBLB	1542	receptor tyrosine kinase binding	GO:0030971	molecular function	22	7	0.0687	0.0929	0.0249	0.796	0.0217	0.0644	0.0734	0.0736	0.117	0.0158	0.0391
857	2146430	CBLB	1542	SH3 domain binding	GO:0017124	molecular function	22	6	0.0856	0.104	0.0435	0.728	0.0362	0.062	0.118	0.073	0.147	0.0212	0.0891
858	2146430	CBLB	1542	membrane raft	GO:0045121	cellular component	22	17	0.0943	0.112	0.0556	0.698	0.0312	0.0691	0.129	0.0738	0.17	0.0306	0.101
859	2146430	CBLB	1542	plasma membrane	GO:0005886	cellular component	22	175	0.114	0.126	0.0796	0.652	0.00372	0.109	0.119	0.104	0.152	0.0747	0.0848
860	2146430	CBLB	1542	protein binding	GO:0005515	molecular function	22	831	0.132	0.127	0.101	0.617	0.0123	0.115	0.152	0.104	0.155	0.0828	0.124
861	2146430	CBLB	1542	cytosol	GO:0005829	cellular component	22	164	0.138	0.127	0.108	0.609	0.00616	0.129	0.147	0.104	0.155	0.0979	0.119
862	2146430	CBLB	1542	nucleoplasm	GO:0005654	cellular component	22	161	0.149	0.13	0.121	0.59	0.0119	0.132	0.169	0.102	0.165	0.101	0.144
863	2146430	CBLB	1542	signal transduction	GO:0007165	biological process	22	62	0.201	0.18	0.176	0.521	0.0426	0.129	0.316	0.105	0.311	0.098	0.317
864	2154244	PLXND1	9107	endothelial cell migration	GO:0043542	biological process	15	5	0.0647	0.118	0.0147	0.85	0.0375	0.0642	0.0651	0.0762	0.184	0.0061	0.0353
865	2154244	PLXND1	9107	regulation of GTPase activity	GO:0043087	biological process	15	9	0.0655	0.118	0.0221	0.809	0.0118	0.062	0.0692	0.0762	0.184	0.0172	0.0283
866	2154244	PLXND1	9107	semaphorin receptor complex	GO:0002116	cellular component	15	4	0.0763	0.118	0.0335	0.761	0.028	0.0633	0.092	0.0762	0.184	0.0186	0.0601
867	2154244	PLXND1	9107	regulation of cell migration	GO:0030334	biological process	15	36	0.0863	0.118	0.0458	0.722	0.0314	0.0651	0.115	0.0762	0.184	0.0246	0.0853
868	2154244	PLXND1	9107	positive regulation of axonogenesis	GO:0050772	biological process	15	9	0.0888	0.118	0.0495	0.713	0.0271	0.0685	0.115	0.0762	0.184	0.029	0.0845
869	2154244	PLXND1	9107	integral component of plasma membrane	GO:0005887	cellular component	15	76	0.107	0.138	0.0727	0.665	0.00359	0.103	0.112	0.12	0.159	0.0683	0.0773
870	2154244	PLXND1	9107	semaphorin receptor activity	GO:0017154	molecular function	15	4	0.115	0.131	0.0795	0.651	0.0289	0.0841	0.157	0.104	0.166	0.0478	0.132
871	2154244	PLXND1	9107	negative regulation of cell adhesion	GO:0007162	biological process	15	12	0.127	0.138	0.0949	0.627	0.00993	0.113	0.143	0.12	0.159	0.0806	0.112
872	2154244	PLXND1	9107	lamellipodium	GO:0030027	cellular component	15	11	0.138	0.142	0.107	0.61	0.00517	0.13	0.146	0.129	0.155	0.0988	0.116
873	2154244	PLXND1	9107	semaphorin-plexin signaling pathway involved in axon guidance	GO:1902287	biological process	15	4	0.149	0.15	0.119	0.59	0.0266	0.112	0.198	0.12	0.186	0.0787	0.181
874	2154244	PLXND1	9107	regulation of cell shape	GO:0008360	biological process	15	23	0.154	0.151	0.127	0.582	0.0122	0.135	0.176	0.13	0.175	0.106	0.152
875	2154244	PLXND1	9107	protein domain specific binding	GO:0019904	molecular function	15	86	0.174	0.168	0.148	0.556	0.0228	0.138	0.22	0.144	0.196	0.107	0.203
876	2154244	PLXND1	9107	protein binding	GO:0005515	molecular function	15	831	0.201	0.185	0.18	0.522	0.00581	0.189	0.214	0.173	0.197	0.167	0.194
877	894286	P4HA2	8547	peptidyl-proline hydroxylation to 4-hydroxy-L-proline	GO:0018401	biological process	18	3	0.0639	0.026	0.0133	0.871	0.00775	0.0632	0.0646	0.0195	0.0346	0.0115	0.0153
878	894286	P4HA2	8547	procollagen-proline 4-dioxygenase activity	GO:0004656	molecular function	18	3	0.0639	0.026	0.0137	0.867	0.00613	0.0632	0.0646	0.0195	0.0346	0.0122	0.0153
879	894286	P4HA2	8547	cytosol	GO:0005829	cellular component	18	164	0.0641	0.0261	0.0188	0.827	0.0107	0.0631	0.0652	0.0195	0.0348	0.0152	0.0233
880	894286	P4HA2	8547	nucleoplasm	GO:0005654	cellular component	18	161	0.0651	0.0261	0.0211	0.814	0.0139	0.0632	0.067	0.0195	0.0348	0.0158	0.0282
881	894286	P4HA2	8547	endoplasmic reticulum	GO:0005783	cellular component	18	62	0.066	0.0263	0.0235	0.801	0.00947	0.0633	0.0688	0.0194	0.0356	0.0192	0.0287
882	894286	P4HA2	8547	intracellular membrane-bounded organelle	GO:0043231	cellular component	18	80	0.0687	0.0276	0.0204	0.819	0.0328	0.0602	0.0784	0.0186	0.0408	0.0104	0.0401
883	95804	GSR	4623	glutathione-disulfide reductase activity	GO:0004362	molecular function	19	4	0.0639	0.0436	0.00989	0.902	0.0145	0.0632	0.0646	0.0361	0.0526	0.00703	0.0139
884	95804	GSR	4623	flavin adenine dinucleotide binding	GO:0050660	molecular function	19	6	0.0639	0.0436	0.0117	0.886	0.00936	0.0632	0.0646	0.0361	0.0526	0.00973	0.0141
885	95804	GSR	4623	cell redox homeostasis	GO:0045454	biological process	19	5	0.0675	0.0459	0.0204	0.82	0.0295	0.0602	0.0758	0.0346	0.061	0.0111	0.0377
886	95804	GSR	4623	glutathione metabolic process	GO:0006749	biological process	19	9	0.0692	0.0479	0.0266	0.787	0.0208	0.0597	0.0803	0.0438	0.0524	0.0171	0.0414
887	95804	GSR	4623	cellular response to oxidative stress	GO:0034599	biological process	19	9	0.0703	0.0486	0.0293	0.776	0.0162	0.0621	0.0797	0.0454	0.0519	0.0207	0.0414
888	95804	GSR	4623	extracellular exosome	GO:0070062	cellular component	19	162	0.084	0.0577	0.0455	0.725	0.0175	0.0716	0.0987	0.0393	0.0846	0.0324	0.0638
889	95804	GSR	4623	mitochondrion	GO:0005739	cellular component	19	93	0.0871	0.0591	0.048	0.717	0.0271	0.0672	0.113	0.0385	0.0907	0.0288	0.0799
890	95804	GSR	4623	cytosol	GO:0005829	cellular component	19	164	0.131	0.098	0.098	0.62	0.0299	0.0961	0.179	0.0616	0.156	0.0616	0.156
891	2149481	CYGB	16505	protein binding	GO:0005515	molecular function	3	831	0.0853	0.0452	0.0452	0.724	0.0311	0.0646	0.113	0.0243	0.0843	0.0243	0.0843
892	1336208	KCNAB3	6230	ion channel binding	GO:0044325	molecular function	13	10	0.0639	0.024	0.00799	0.921	0.00977	0.0632	0.0646	0.0199	0.0289	0.00557	0.0115
893	1336208	KCNAB3	6230	potassium channel regulator activity	GO:0015459	molecular function	13	7	0.0639	0.024	0.00971	0.907	0.00738	0.0632	0.0646	0.0199	0.0289	0.00805	0.0117
894	1336208	KCNAB3	6230	regulation of potassium ion transmembrane transport	GO:1901379	biological process	13	10	0.0639	0.024	0.0139	0.865	0.0179	0.0632	0.0646	0.0199	0.0289	0.00982	0.0196
895	1336208	KCNAB3	6230	aldo-keto reductase (NADP) activity	GO:0004033	molecular function	13	5	0.0679	0.0321	0.0231	0.805	0.0257	0.0603	0.0764	0.0215	0.048	0.0135	0.0394
896	1336208	KCNAB3	6230	voltage-gated potassium channel complex	GO:0008076	cellular component	13	21	0.0679	0.0319	0.0247	0.796	0.0186	0.0606	0.0762	0.023	0.0442	0.0166	0.0367
897	1336208	KCNAB3	6230	protein binding	GO:0005515	molecular function	13	831	0.157	0.13	0.13	0.579	0.00243	0.153	0.16	0.125	0.134	0.125	0.134
898	2448554	NBEAL2	31928	protein localization	GO:0008104	biological process	14	22	0.0863	0.161	0.0482	0.718	0.0203	0.0705	0.106	0.126	0.206	0.0328	0.0708
899	2448554	NBEAL2	31928	protein kinase binding	GO:0019901	molecular function	14	38	0.0886	0.161	0.0501	0.713	0.023	0.0715	0.11	0.126	0.206	0.0324	0.0774
900	2448554	NBEAL2	31928	membrane	GO:0016020	cellular component	14	157	0.111	0.169	0.0768	0.658	0.00671	0.104	0.118	0.142	0.2	0.0685	0.0861
901	2448554	NBEAL2	31928	cytosol	GO:0005829	cellular component	14	164	0.138	0.173	0.107	0.609	0.0141	0.12	0.16	0.139	0.216	0.0864	0.133
902	2448554	NBEAL2	31928	endoplasmic reticulum	GO:0005783	cellular component	14	62	0.173	0.175	0.149	0.556	0.00334	0.168	0.179	0.142	0.215	0.142	0.156
903	2448554	NBEAL2	31928	protein binding	GO:0005515	molecular function	14	831	0.177	0.18	0.152	0.551	0.0199	0.144	0.219	0.138	0.234	0.116	0.2
904	2448554	NBEAL2	31928	platelet formation	GO:0030220	biological process	14	3	0.224	0.222	0.198	0.493	0.0606	0.123	0.41	0.126	0.39	0.0949	0.415
905	1915240	MPC1	21606	mitochondrial pyruvate transmembrane transport	GO:0006850	biological process	5	3	0.0765	0.156	0.0376	0.748	0.0102	0.0703	0.0831	0.114	0.214	0.0304	0.0466
906	1915240	MPC1	21606	integral component of mitochondrial inner membrane	GO:0031305	cellular component	5	10	0.099	0.156	0.0624	0.685	0.017	0.0838	0.117	0.114	0.214	0.0455	0.0856
907	1915240	MPC1	21606	pyruvate transmembrane transporter activity	GO:0050833	molecular function	5	4	0.145	0.184	0.115	0.598	0.0117	0.129	0.163	0.158	0.214	0.0963	0.138
908	1915240	MPC1	21606	mitochondrion	GO:0005739	cellular component	5	93	0.177	0.19	0.152	0.552	0.013	0.155	0.202	0.159	0.228	0.127	0.183
909	1915240	MPC1	21606	protein binding	GO:0005515	molecular function	5	831	0.319	0.309	0.309	0.412	0.0108	0.289	0.352	0.276	0.345	0.276	0.345
910	109562	ACKR3	23692	chemokine-mediated signaling pathway	GO:0070098	biological process	27	13	0.0639	0.0893	0.0134	0.869	0.0152	0.0632	0.0646	0.0761	0.105	0.00996	0.0179
911	109562	ACKR3	23692	scavenger receptor activity	GO:0005044	molecular function	27	2	0.0639	0.0893	0.0157	0.848	0.00736	0.0632	0.0646	0.0761	0.105	0.0138	0.018
912	109562	ACKR3	23692	C-X-C chemokine binding	GO:0019958	molecular function	27	3	0.0639	0.0893	0.0162	0.846	0.0207	0.0633	0.0646	0.0761	0.105	0.0109	0.0241
913	109562	ACKR3	23692	external side of plasma membrane	GO:0009897	cellular component	27	10	0.0643	0.0893	0.0161	0.847	0.0202	0.0642	0.0644	0.0761	0.105	0.0109	0.0237
914	109562	ACKR3	23692	endosome	GO:0005768	cellular component	27	27	0.0731	0.097	0.0338	0.761	0.00669	0.0695	0.0768	0.085	0.111	0.0292	0.039
915	109562	ACKR3	23692	C-C chemokine binding	GO:0019957	molecular function	27	9	0.0763	0.0931	0.035	0.756	0.0221	0.065	0.0896	0.0757	0.115	0.022	0.0557
916	109562	ACKR3	23692	positive regulation of cytosolic calcium ion concentration	GO:0007204	biological process	27	10	0.0815	0.0931	0.0413	0.736	0.0236	0.0666	0.0997	0.0757	0.115	0.0254	0.0672
917	109562	ACKR3	23692	positive regulation of ERK1 and ERK2 cascade	GO:0070374	biological process	27	15	0.083	0.0931	0.0434	0.73	0.024	0.0669	0.103	0.0757	0.115	0.0266	0.0707
918	109562	ACKR3	23692	cell chemotaxis	GO:0060326	biological process	27	22	0.0901	0.097	0.0523	0.708	0.0179	0.0751	0.108	0.085	0.111	0.037	0.0739
919	109562	ACKR3	23692	receptor internalization	GO:0031623	biological process	27	13	0.097	0.101	0.0607	0.689	0.00929	0.0878	0.107	0.0937	0.108	0.0513	0.0718
920	109562	ACKR3	23692	negative regulation of intrinsic apoptotic signaling pathway in response to DNA damage	GO:1902230	biological process	27	6	0.0995	0.107	0.0621	0.684	0.0307	0.0719	0.138	0.0944	0.122	0.0362	0.107
921	109562	ACKR3	23692	C-X-C chemokine receptor activity	GO:0016494	molecular function	27	4	0.103	0.102	0.068	0.674	0.011	0.0916	0.116	0.093	0.111	0.0562	0.0822
922	109562	ACKR3	23692	intracellular membrane-bounded organelle	GO:0043231	cellular component	27	80	0.105	0.105	0.0688	0.671	0.0265	0.0808	0.137	0.0975	0.112	0.0424	0.112
923	109562	ACKR3	23692	clathrin-coated pit	GO:0005905	cellular component	27	3	0.106	0.102	0.0713	0.668	0.0129	0.0925	0.122	0.093	0.111	0.057	0.0891
924	109562	ACKR3	23692	C-C chemokine receptor activity	GO:0016493	molecular function	27	6	0.112	0.105	0.0779	0.655	0.0114	0.0992	0.127	0.0975	0.112	0.0641	0.0946
925	109562	ACKR3	23692	plasma membrane	GO:0005886	cellular component	27	175	0.113	0.105	0.0785	0.655	0.00209	0.111	0.115	0.0975	0.112	0.0757	0.0813
926	109562	ACKR3	23692	immune response	GO:0006955	biological process	27	14	0.121	0.106	0.0875	0.639	0.0106	0.108	0.135	0.0965	0.116	0.0733	0.105
927	109562	ACKR3	23692	cell surface	GO:0009986	cellular component	27	30	0.123	0.105	0.0903	0.635	0.00358	0.119	0.127	0.099	0.112	0.0849	0.096
928	109562	ACKR3	23692	protein binding	GO:0005515	molecular function	27	831	0.187	0.17	0.164	0.539	0.00983	0.168	0.207	0.153	0.189	0.143	0.187
929	109562	ACKR3	23692	calcium-mediated signaling	GO:0019722	biological process	27	15	0.189	0.168	0.165	0.537	0.0236	0.147	0.242	0.126	0.224	0.12	0.227
930	1926079	TSC22D4	21696	protein binding	GO:0005515	molecular function	10	831	0.0682	0.0312	0.025	0.794	0.0208	0.0616	0.0755	0.0208	0.0469	0.016	0.0392
931	1926079	TSC22D4	21696	response to osmotic stress	GO:0006970	biological process	10	12	0.0687	0.029	0.023	0.805	0.0267	0.0606	0.078	0.0201	0.0417	0.0132	0.0401
932	1915372	NKAIN4	16191	regulation of sodium ion transport	GO:0002028	biological process	13	5	0.0639	0.0125	0.00625	0.939	0.00394	0.0632	0.0646	0.0102	0.0154	0.00509	0.00768
933	1915372	NKAIN4	16191	protein binding	GO:0005515	molecular function	13	831	0.0875	0.0503	0.0503	0.713	0.00849	0.0811	0.0945	0.0426	0.0594	0.0426	0.0594
934	3041196	GASK1A	24485	intracellular membrane-bounded organelle	GO:0043231	cellular component	1	80	0.0747	0.031	0.031	0.77	0.0329	0.0608	0.0917	0.0156	0.0615	0.0156	0.0615
935	1277179	PDE9A	8795	sarcolemma	GO:0042383	cellular component	22	5	0.0639	0.0519	0.00903	0.907	0.0214	0.0632	0.0646	0.0333	0.0809	0.00545	0.015
936	1277179	PDE9A	8795	3',5'-cyclic-GMP phosphodiesterase activity	GO:0047555	molecular function	22	5	0.0639	0.0519	0.0158	0.849	0.0161	0.0632	0.0646	0.0333	0.0809	0.0117	0.0214
937	1277179	PDE9A	8795	3',5'-cyclic-nucleotide phosphodiesterase activity	GO:0004114	molecular function	22	10	0.0654	0.0519	0.0185	0.831	0.0297	0.0634	0.0674	0.0333	0.0809	0.0103	0.0333
938	1277179	PDE9A	8795	cGMP metabolic process	GO:0046068	biological process	22	5	0.0655	0.0519	0.021	0.815	0.0156	0.0639	0.0671	0.0333	0.0809	0.0153	0.0288
939	1277179	PDE9A	8795	cGMP catabolic process	GO:0046069	biological process	22	5	0.0724	0.0624	0.0316	0.768	0.018	0.0623	0.084	0.0372	0.105	0.0217	0.046
940	1277179	PDE9A	8795	cGMP-mediated signaling	GO:0019934	biological process	22	6	0.1	0.0781	0.0481	0.712	0.0655	0.0643	0.156	0.0342	0.178	0.0135	0.172
941	1277179	PDE9A	8795	signal transduction	GO:0007165	biological process	22	62	0.1	0.0836	0.0578	0.689	0.0493	0.0637	0.158	0.0418	0.167	0.0225	0.148
942	1277179	PDE9A	8795	plasma membrane	GO:0005886	cellular component	22	175	0.115	0.122	0.0806	0.65	0.0166	0.0973	0.136	0.105	0.143	0.0608	0.107
943	1277179	PDE9A	8795	cytosol	GO:0005829	cellular component	22	164	0.142	0.13	0.111	0.603	0.0118	0.126	0.16	0.107	0.158	0.0931	0.133
944	1277179	PDE9A	8795	protein binding	GO:0005515	molecular function	22	831	0.142	0.13	0.111	0.602	0.0215	0.114	0.178	0.107	0.158	0.0806	0.154
945	1277179	PDE9A	8795	nucleoplasm	GO:0005654	cellular component	22	161	0.164	0.138	0.138	0.569	0.00936	0.149	0.18	0.121	0.157	0.121	0.157
946	94872	DCN	2705	positive regulation of macroautophagy	GO:0016239	biological process	24	13	0.0639	0.0468	0.0105	0.896	0.0176	0.0632	0.0646	0.0392	0.0558	0.00726	0.0152
947	94872	DCN	2705	positive regulation of phosphatidylinositol 3-kinase signaling	GO:0014068	biological process	24	8	0.0639	0.0468	0.0118	0.884	0.0141	0.0632	0.0646	0.0392	0.0558	0.00882	0.0158
948	94872	DCN	2705	collagen-containing extracellular matrix	GO:0062023	cellular component	24	28	0.0639	0.0468	0.0124	0.88	0.00429	0.0632	0.0646	0.0392	0.0558	0.0115	0.0134
949	94872	DCN	2705	positive regulation of autophagy	GO:0010508	biological process	24	11	0.0639	0.0468	0.0187	0.828	0.00477	0.0632	0.0646	0.0392	0.0558	0.0169	0.0206
950	94872	DCN	2705	negative regulation of vascular endothelial growth factor signaling pathway	GO:1900747	biological process	24	4	0.064	0.0468	0.017	0.84	0.0104	0.0632	0.0648	0.0392	0.0558	0.0138	0.0208
951	94872	DCN	2705	negative regulation of endothelial cell migration	GO:0010596	biological process	24	8	0.0665	0.0475	0.0182	0.834	0.029	0.0621	0.0713	0.0389	0.058	0.0101	0.0326
952	94872	DCN	2705	positive regulation of mitochondrial depolarization	GO:0051901	biological process	24	3	0.0867	0.0773	0.0464	0.72	0.0344	0.0627	0.12	0.0549	0.109	0.0241	0.0894
953	94872	DCN	2705	positive regulation of mitochondrial fission	GO:0090141	biological process	24	5	0.0877	0.0775	0.0501	0.714	0.0117	0.0784	0.098	0.0613	0.0978	0.0399	0.0629
954	94872	DCN	2705	extracellular space	GO:0005615	cellular component	24	54	0.0904	0.079	0.0532	0.706	0.0116	0.0811	0.101	0.0648	0.0962	0.0428	0.0661
955	94872	DCN	2705	RNA binding	GO:0003723	molecular function	24	82	0.0909	0.0773	0.0517	0.707	0.0303	0.0684	0.121	0.0549	0.109	0.0288	0.0928
956	94872	DCN	2705	negative regulation of angiogenesis	GO:0016525	biological process	24	9	0.119	0.113	0.083	0.641	0.042	0.0763	0.186	0.0826	0.155	0.0411	0.167
957	94872	DCN	2705	extracellular region	GO:0005576	cellular component	24	16	0.121	0.111	0.0869	0.64	0.0163	0.101	0.144	0.0926	0.134	0.0659	0.115
958	94872	DCN	2705	protein binding	GO:0005515	molecular function	24	831	0.162	0.147	0.136	0.571	0.00531	0.153	0.172	0.136	0.158	0.126	0.147
959	94872	DCN	2705	positive regulation of transcription by RNA polymerase II	GO:0045944	biological process	24	70	0.178	0.159	0.154	0.55	0.016	0.151	0.211	0.133	0.189	0.123	0.192
960	96108	HLF	4977	positive regulation of transcription by RNA polymerase II	GO:0045944	biological process	25	70	0.0639	0.0167	0.00802	0.925	0.0025	0.0632	0.0646	0.0153	0.0182	0.00743	0.00865
961	96108	HLF	4977	DNA-binding transcription factor activity, RNA polymerase II-specific	GO:0000981	molecular function	25	47	0.0639	0.0167	0.00958	0.909	0.00572	0.0632	0.0646	0.0153	0.0182	0.00829	0.0111
962	96108	HLF	4977	RNA polymerase II cis-regulatory region sequence-specific DNA binding	GO:0000978	molecular function	25	56	0.0639	0.0167	0.0118	0.887	0.00509	0.0632	0.0646	0.0153	0.0182	0.0107	0.013
963	96108	HLF	4977	DNA-binding transcription activator activity, RNA polymerase II-specific	GO:0001228	molecular function	25	16	0.0639	0.0167	0.0118	0.886	0.00713	0.0632	0.0646	0.0153	0.0182	0.0104	0.0135
964	96108	HLF	4977	nucleus	GO:0005634	cellular component	25	200	0.0639	0.0167	0.013	0.873	0.00881	0.0632	0.0646	0.0153	0.0182	0.0111	0.0153
965	96108	HLF	4977	nucleoplasm	GO:0005654	cellular component	25	161	0.0639	0.0167	0.014	0.864	0.0096	0.0632	0.0646	0.0153	0.0182	0.0118	0.0166
966	96108	HLF	4977	regulation of transcription by RNA polymerase II	GO:0006357	biological process	25	76	0.0639	0.0167	0.0141	0.863	0.00555	0.0632	0.0646	0.0153	0.0182	0.0127	0.0157
967	96108	HLF	4977	sequence-specific double-stranded DNA binding	GO:1990837	molecular function	25	31	0.0639	0.0167	0.0146	0.859	0.00663	0.0632	0.0646	0.0153	0.0182	0.0129	0.0164
968	96108	HLF	4977	sequence-specific DNA binding	GO:0043565	molecular function	25	14	0.0639	0.0185	0.0185	0.828	0.00362	0.0632	0.0646	0.0171	0.0201	0.0171	0.0201
969	1916801	C1orf198	25900	cytosol	GO:0005829	cellular component	5	164	0.0853	0.0461	0.0461	0.723	0.0242	0.0675	0.108	0.0285	0.0745	0.0285	0.0745
970	1915241	NACC2	23846	histone deacetylase binding	GO:0042826	molecular function	19	8	0.0661	0.208	0.0204	0.818	0.0195	0.0625	0.07	0.16	0.272	0.0136	0.0305
971	1915241	NACC2	23846	positive regulation of intrinsic apoptotic signaling pathway in response to DNA damage	GO:1902231	biological process	19	5	0.0821	0.208	0.043	0.732	0.0213	0.0668	0.101	0.16	0.272	0.0283	0.0654
972	1915241	NACC2	23846	protein homooligomerization	GO:0051260	biological process	19	7	0.0864	0.208	0.0467	0.72	0.03	0.0652	0.115	0.16	0.272	0.026	0.084
973	1915241	NACC2	23846	negative regulation of G1/S transition of mitotic cell cycle by negative regulation of transcription from RNA polymerase II promoter	GO:1900477	biological process	19	3	0.0966	0.208	0.0518	0.702	0.0547	0.0586	0.159	0.16	0.272	0.0187	0.144
974	1915241	NACC2	23846	negative regulation of transcription, DNA-templated	GO:0045892	biological process	19	44	0.0967	0.208	0.0577	0.693	0.0355	0.0673	0.139	0.16	0.272	0.0304	0.11
975	1915241	NACC2	23846	negative regulation of transcription by RNA polymerase II	GO:0000122	biological process	19	57	0.114	0.211	0.0795	0.653	0.00743	0.106	0.122	0.162	0.275	0.07	0.0902
976	1915241	NACC2	23846	DNA-binding transcription repressor activity, RNA polymerase II-specific	GO:0001227	molecular function	19	10	0.125	0.211	0.091	0.632	0.0253	0.0946	0.164	0.162	0.275	0.0598	0.139
977	1915241	NACC2	23846	regulation of transcription by RNA polymerase II	GO:0006357	biological process	19	76	0.136	0.212	0.104	0.612	0.0256	0.103	0.179	0.163	0.276	0.0687	0.158
978	1915241	NACC2	23846	DNA-binding transcription factor activity, RNA polymerase II-specific	GO:0000981	molecular function	19	47	0.14	0.212	0.11	0.604	0.0212	0.112	0.176	0.163	0.276	0.0784	0.155
979	1915241	NACC2	23846	RNA polymerase II cis-regulatory region sequence-specific DNA binding	GO:0000978	molecular function	19	56	0.155	0.212	0.126	0.581	0.0261	0.117	0.206	0.163	0.276	0.0847	0.188
980	1915241	NACC2	23846	nucleus	GO:0005634	cellular component	19	200	0.171	0.216	0.146	0.559	0.0165	0.144	0.204	0.172	0.272	0.115	0.184
981	1915241	NACC2	23846	protein-containing complex binding	GO:0044877	molecular function	19	86	0.179	0.221	0.149	0.549	0.0461	0.111	0.289	0.168	0.289	0.078	0.286
982	1915241	NACC2	23846	chromatin	GO:0000785	cellular component	19	17	0.181	0.216	0.158	0.546	0.00518	0.171	0.192	0.172	0.272	0.147	0.169
983	1915241	NACC2	23846	cellular protein-containing complex localization	GO:0034629	biological process	19	17	0.19	0.225	0.161	0.534	0.0504	0.113	0.318	0.166	0.306	0.0836	0.312
984	1915241	NACC2	23846	nucleolus	GO:0005730	cellular component	19	26	0.202	0.22	0.181	0.52	0.02	0.164	0.249	0.171	0.283	0.139	0.234
985	1915241	NACC2	23846	negative regulation of cell population proliferation	GO:0008285	biological process	19	45	0.207	0.225	0.183	0.514	0.0422	0.134	0.319	0.166	0.306	0.108	0.31
986	1915241	NACC2	23846	protein binding	GO:0005515	molecular function	19	831	0.219	0.22	0.2	0.502	0.0127	0.192	0.25	0.171	0.284	0.17	0.235
987	1915241	NACC2	23846	mitochondrion	GO:0005739	cellular component	19	93	0.219	0.232	0.2	0.503	0.00447	0.209	0.23	0.194	0.278	0.189	0.211
988	1915241	NACC2	23846	protein homodimerization activity	GO:0042803	molecular function	19	34	0.221	0.22	0.202	0.5	0.0159	0.187	0.261	0.171	0.284	0.165	0.248
989	88057	APOE	613	synaptic cleft	GO:0043083	cellular component	137	2	0.0639	0.0977	0.00324	0.962	0.00233	0.0632	0.0646	0.0942	0.101	0.00263	0.00399
990	88057	APOE	613	signaling receptor binding	GO:0005102	molecular function	137	73	0.0639	0.0977	0.00704	0.928	0.011	0.0632	0.0646	0.0942	0.101	0.00429	0.0115
991	88057	APOE	613	extracellular matrix	GO:0031012	cellular component	137	21	0.0639	0.0977	0.00704	0.927	0.0128	0.0632	0.0646	0.0942	0.101	0.00407	0.0122
992	88057	APOE	613	intermediate-density lipoprotein particle clearance	GO:0071831	biological process	137	2	0.0639	0.0977	0.00803	0.92	0.0118	0.0632	0.0646	0.0942	0.101	0.00531	0.0122
993	88057	APOE	613	chylomicron remnant clearance	GO:0034382	biological process	137	2	0.0639	0.0977	0.00821	0.919	0.011	0.0632	0.0646	0.0942	0.101	0.0058	0.0116
994	88057	APOE	613	protein dimerization activity	GO:0046983	molecular function	137	4	0.0639	0.0977	0.00993	0.906	0.00351	0.0632	0.0646	0.0942	0.101	0.00915	0.0108
995	88057	APOE	613	amyloid-beta binding	GO:0001540	molecular function	137	6	0.0639	0.0977	0.011	0.891	0.0178	0.0632	0.0646	0.0942	0.101	0.00774	0.0157
996	88057	APOE	613	positive regulation of cholesterol efflux	GO:0010875	biological process	137	5	0.0639	0.0977	0.0102	0.887	0.0295	0.0632	0.0646	0.0942	0.101	0.0045	0.0231
997	88057	APOE	613	positive regulation of cholesterol esterification	GO:0010873	biological process	137	4	0.0639	0.0977	0.0118	0.886	0.00732	0.0632	0.0646	0.0942	0.101	0.0102	0.0136
998	88057	APOE	613	collagen-containing extracellular matrix	GO:0062023	cellular component	137	28	0.0639	0.0977	0.0115	0.883	0.0209	0.0632	0.0646	0.0942	0.101	0.00719	0.0185
999	88057	APOE	613	AMPA glutamate receptor clustering	GO:0097113	biological process	137	2	0.0639	0.0977	0.013	0.874	0.0101	0.0632	0.0646	0.0942	0.101	0.0107	0.0157
1000	88057	APOE	613	very-low-density lipoprotein particle receptor binding	GO:0070326	molecular function	137	2	0.0639	0.0977	0.0136	0.868	0.0106	0.0632	0.0646	0.0942	0.101	0.0111	0.0165
1001	88057	APOE	613	low-density lipoprotein particle receptor binding	GO:0050750	molecular function	137	2	0.0639	0.0977	0.0139	0.864	0.0133	0.0632	0.0646	0.0942	0.101	0.0109	0.0178
1002	88057	APOE	613	reverse cholesterol transport	GO:0043691	biological process	137	2	0.0639	0.0977	0.0159	0.847	0.00574	0.0632	0.0646	0.0942	0.101	0.0143	0.0176
1003	88057	APOE	613	negative regulation of amyloid-beta formation	GO:1902430	biological process	137	5	0.0645	0.0991	0.019	0.827	0.0176	0.0639	0.0651	0.0936	0.105	0.0134	0.0268
1004	88057	APOE	613	fatty acid homeostasis	GO:0055089	biological process	137	2	0.0647	0.0985	0.0212	0.813	0.00724	0.0634	0.0661	0.094	0.103	0.0183	0.0247
1005	88057	APOE	613	positive regulation of low-density lipoprotein particle receptor catabolic process	GO:0032805	biological process	137	4	0.0647	0.0977	0.0194	0.824	0.0157	0.0626	0.0669	0.0942	0.101	0.0142	0.0267
1006	88057	APOE	613	positive regulation of heparan sulfate proteoglycan binding	GO:1905860	biological process	137	3	0.0648	0.0977	0.0137	0.863	0.0333	0.0626	0.0671	0.0942	0.101	0.00673	0.028
1007	88057	APOE	613	positive regulation of lipid transport across blood-brain barrier	GO:1903002	biological process	137	4	0.0649	0.0977	0.0202	0.82	0.0156	0.0628	0.0671	0.0942	0.101	0.0147	0.0278
1008	88057	APOE	613	cholesterol efflux	GO:0033344	biological process	137	4	0.0653	0.0991	0.0225	0.806	0.0102	0.0628	0.0679	0.0936	0.105	0.0181	0.028
1009	88057	APOE	613	intermediate-density lipoprotein particle	GO:0034363	cellular component	137	2	0.0655	0.103	0.02	0.82	0.0157	0.0621	0.069	0.0907	0.117	0.0143	0.0279
1010	88057	APOE	613	negative regulation of blood coagulation	GO:0030195	biological process	137	12	0.066	0.0991	0.024	0.799	0.00551	0.0642	0.0678	0.0936	0.105	0.0213	0.0271
1011	88057	APOE	613	regulation of amyloid precursor protein catabolic process	GO:1902991	biological process	137	7	0.0666	0.106	0.023	0.804	0.0165	0.061	0.0728	0.0887	0.126	0.0162	0.0327
1012	88057	APOE	613	high-density lipoprotein particle assembly	GO:0034380	biological process	137	2	0.0687	0.107	0.0211	0.816	0.0391	0.0614	0.0769	0.0874	0.132	0.00946	0.0469
1013	88057	APOE	613	regulation of Cdc42 protein signal transduction	GO:0032489	biological process	137	2	0.0691	0.0985	0.021	0.816	0.0325	0.0599	0.0798	0.0941	0.103	0.0107	0.0412
1014	88057	APOE	613	regulation of proteasomal protein catabolic process	GO:0061136	biological process	137	7	0.0693	0.103	0.0261	0.789	0.0258	0.0587	0.0818	0.099	0.107	0.0152	0.0449
1015	88057	APOE	613	very-low-density lipoprotein particle remodeling	GO:0034372	biological process	137	2	0.0704	0.109	0.0274	0.784	0.0211	0.0617	0.0802	0.0858	0.139	0.0176	0.0428
1016	88057	APOE	613	negative regulation of platelet activation	GO:0010544	biological process	137	5	0.0708	0.104	0.0307	0.772	0.00762	0.0665	0.0755	0.0918	0.118	0.026	0.0362
1017	88057	APOE	613	regulation of protein metabolic process	GO:0051246	biological process	137	21	0.0758	0.111	0.0368	0.751	0.0119	0.0689	0.0834	0.0987	0.126	0.0289	0.047
1018	88057	APOE	613	positive regulation of neuron projection development	GO:0010976	biological process	137	9	0.0759	0.11	0.0313	0.769	0.0331	0.063	0.0913	0.0871	0.14	0.0158	0.0622
1019	88057	APOE	613	phospholipid binding	GO:0005543	molecular function	137	17	0.0761	0.112	0.0345	0.756	0.0286	0.0589	0.0983	0.0838	0.15	0.0194	0.0616
1020	88057	APOE	613	positive regulation of membrane protein ectodomain proteolysis	GO:0051044	biological process	137	6	0.0762	0.11	0.0369	0.751	0.0144	0.0666	0.0872	0.0871	0.14	0.0273	0.0497
1021	88057	APOE	613	high-density lipoprotein particle remodeling	GO:0034375	biological process	137	3	0.0781	0.116	0.0378	0.746	0.0262	0.0622	0.0982	0.0913	0.147	0.022	0.065
1022	88057	APOE	613	positive regulation of endocytosis	GO:0045807	biological process	137	11	0.0782	0.112	0.0385	0.745	0.022	0.0645	0.0948	0.0984	0.128	0.0247	0.06
1023	88057	APOE	613	negative regulation of endothelial cell migration	GO:0010596	biological process	137	8	0.0801	0.111	0.0327	0.759	0.0504	0.0528	0.121	0.0846	0.147	0.0121	0.0882
1024	88057	APOE	613	extracellular vesicle	GO:1903561	cellular component	137	18	0.0804	0.116	0.0408	0.737	0.0244	0.0653	0.099	0.0959	0.141	0.0246	0.0677
1025	88057	APOE	613	positive regulation of dendritic spine maintenance	GO:1902952	biological process	137	3	0.0806	0.113	0.0413	0.737	0.0173	0.0685	0.0948	0.09	0.141	0.029	0.059
1026	88057	APOE	613	regulation of amyloid fibril formation	GO:1905906	biological process	137	5	0.0807	0.116	0.0417	0.735	0.0218	0.0651	0.1	0.0893	0.15	0.0271	0.064
1027	88057	APOE	613	very-low-density lipoprotein particle	GO:0034361	cellular component	137	3	0.0812	0.113	0.0416	0.735	0.023	0.0652	0.101	0.0851	0.15	0.0263	0.0658
1028	88057	APOE	613	positive regulation of lipid biosynthetic process	GO:0046889	biological process	137	21	0.0845	0.118	0.0464	0.723	0.0143	0.0743	0.0961	0.0981	0.141	0.0351	0.0612
1029	88057	APOE	613	negative regulation of neuron apoptotic process	GO:0043524	biological process	137	16	0.0851	0.125	0.0473	0.721	0.0127	0.0747	0.097	0.106	0.147	0.037	0.0605
1030	88057	APOE	613	regulation of amyloid-beta clearance	GO:1900221	biological process	137	4	0.0853	0.118	0.0432	0.727	0.0417	0.0571	0.127	0.0941	0.149	0.0194	0.0961
1031	88057	APOE	613	receptor-mediated endocytosis	GO:0006898	biological process	137	11	0.0858	0.12	0.0468	0.72	0.0264	0.0667	0.11	0.0911	0.157	0.0279	0.0787
1032	88057	APOE	613	virion assembly	GO:0019068	biological process	137	2	0.0881	0.118	0.0471	0.717	0.0413	0.0588	0.132	0.0894	0.157	0.0216	0.103
1033	88057	APOE	613	heparin binding	GO:0008201	molecular function	137	11	0.0886	0.115	0.0474	0.717	0.0402	0.0599	0.131	0.084	0.157	0.0223	0.101
1034	88057	APOE	613	lipid binding	GO:0008289	molecular function	137	18	0.0905	0.119	0.0505	0.709	0.0405	0.0603	0.136	0.0911	0.157	0.0241	0.106
1035	88057	APOE	613	heparan sulfate proteoglycan binding	GO:0043395	molecular function	137	3	0.0999	0.125	0.0613	0.683	0.0439	0.0635	0.157	0.0876	0.177	0.0287	0.131
1036	88057	APOE	613	negative regulation of cellular protein metabolic process	GO:0032269	biological process	137	9	0.1	0.132	0.0641	0.682	0.0116	0.0895	0.112	0.123	0.142	0.0519	0.0791
1037	88057	APOE	613	cholesterol catabolic process	GO:0006707	biological process	137	5	0.1	0.124	0.0625	0.682	0.0359	0.0696	0.145	0.0937	0.163	0.0331	0.118
1038	88057	APOE	613	positive regulation of dendritic spine development	GO:0060999	biological process	137	4	0.102	0.131	0.0642	0.679	0.0332	0.0728	0.143	0.104	0.163	0.0351	0.117
1039	88057	APOE	613	low-density lipoprotein particle	GO:0034362	cellular component	137	3	0.102	0.131	0.0658	0.677	0.0227	0.08	0.13	0.105	0.163	0.0438	0.0989
1040	88057	APOE	613	positive regulation of ERK1 and ERK2 cascade	GO:0070374	biological process	137	15	0.105	0.136	0.0683	0.673	0.0215	0.0829	0.132	0.114	0.162	0.047	0.0992
1041	88057	APOE	613	protein-containing complex binding	GO:0044877	molecular function	137	86	0.105	0.136	0.0696	0.671	0.00908	0.0952	0.115	0.116	0.158	0.0594	0.0815
1042	88057	APOE	613	metal chelating activity	GO:0046911	molecular function	137	2	0.105	0.129	0.0653	0.673	0.0486	0.0647	0.17	0.0922	0.182	0.0275	0.155
1043	88057	APOE	613	regulation of cellular response to very-low-density lipoprotein particle stimulus	GO:1905890	biological process	137	5	0.106	0.139	0.0705	0.668	0.0222	0.0853	0.133	0.137	0.14	0.0476	0.104
1044	88057	APOE	613	protein import	GO:0017038	biological process	137	8	0.109	0.139	0.0739	0.663	0.00661	0.101	0.118	0.119	0.163	0.066	0.0828
1045	88057	APOE	613	amyloid precursor protein metabolic process	GO:0042982	biological process	137	4	0.109	0.138	0.0739	0.663	0.0118	0.0952	0.124	0.114	0.167	0.0603	0.0906
1046	88057	APOE	613	negative regulation of protein secretion	GO:0050709	biological process	137	17	0.109	0.14	0.073	0.663	0.0297	0.0797	0.15	0.111	0.177	0.0442	0.121
1047	88057	APOE	613	regulation of behavioral fear response	GO:2000822	biological process	137	6	0.11	0.137	0.0737	0.661	0.0282	0.0809	0.149	0.107	0.175	0.0443	0.122
1048	88057	APOE	613	phospholipid efflux	GO:0033700	biological process	137	2	0.11	0.143	0.0745	0.661	0.0224	0.0878	0.138	0.13	0.157	0.051	0.109
1049	88057	APOE	613	triglyceride-rich lipoprotein particle clearance	GO:0071830	biological process	137	4	0.11	0.138	0.0753	0.66	0.0176	0.0909	0.134	0.114	0.167	0.0553	0.102
1050	88057	APOE	613	positive regulation of phospholipid efflux	GO:1902995	biological process	137	3	0.113	0.138	0.0771	0.654	0.0333	0.0794	0.161	0.107	0.178	0.0425	0.14
1051	88057	APOE	613	chylomicron	GO:0042627	cellular component	137	4	0.113	0.136	0.0792	0.653	0.0162	0.0953	0.135	0.117	0.158	0.0604	0.104
1052	88057	APOE	613	blood microparticle	GO:0072562	cellular component	137	4	0.114	0.139	0.0791	0.652	0.0216	0.0912	0.142	0.124	0.157	0.0546	0.115
1053	88057	APOE	613	negative regulation of long-term synaptic potentiation	GO:1900272	biological process	137	3	0.115	0.148	0.0786	0.652	0.0313	0.0834	0.158	0.135	0.162	0.0461	0.134
1054	88057	APOE	613	negative regulation of neuron projection development	GO:0010977	biological process	137	9	0.117	0.149	0.0796	0.647	0.0435	0.0737	0.184	0.104	0.212	0.0381	0.166
1055	88057	APOE	613	high-density lipoprotein particle	GO:0034364	cellular component	137	5	0.119	0.14	0.086	0.641	0.0155	0.101	0.141	0.121	0.164	0.0664	0.111
1056	88057	APOE	613	extracellular space	GO:0005615	cellular component	137	54	0.12	0.143	0.0864	0.641	0.0121	0.106	0.135	0.13	0.158	0.0704	0.106
1057	88057	APOE	613	Golgi apparatus	GO:0005794	cellular component	137	55	0.12	0.141	0.0866	0.639	0.0251	0.0918	0.158	0.114	0.175	0.0563	0.133
1058	88057	APOE	613	phosphatidylcholine-sterol O-acyltransferase activator activity	GO:0060228	molecular function	137	2	0.123	0.145	0.0896	0.634	0.0217	0.0976	0.154	0.124	0.171	0.0629	0.128
1059	88057	APOE	613	positive regulation by host of viral process	GO:0044794	biological process	137	4	0.125	0.148	0.091	0.631	0.0316	0.0906	0.172	0.122	0.18	0.0537	0.154
1060	88057	APOE	613	NMDA glutamate receptor clustering	GO:0097114	biological process	137	2	0.125	0.147	0.0929	0.631	0.00249	0.123	0.128	0.137	0.159	0.0892	0.0967
1061	88057	APOE	613	cGMP-mediated signaling	GO:0019934	biological process	137	6	0.126	0.15	0.0943	0.628	0.00795	0.115	0.139	0.137	0.165	0.0828	0.107
1062	88057	APOE	613	negative regulation of endothelial cell proliferation	GO:0001937	biological process	137	7	0.129	0.156	0.0968	0.624	0.0151	0.11	0.152	0.138	0.176	0.0758	0.124
1063	88057	APOE	613	lipoprotein particle	GO:1990777	cellular component	137	3	0.133	0.162	0.101	0.617	0.0248	0.102	0.172	0.133	0.199	0.0681	0.148
1064	88057	APOE	613	negative regulation of MAP kinase activity	GO:0043407	biological process	137	6	0.135	0.156	0.104	0.613	0.0105	0.122	0.151	0.149	0.163	0.0884	0.123
1065	88057	APOE	613	negative regulation of blood vessel endothelial cell migration	GO:0043537	biological process	137	5	0.136	0.164	0.104	0.611	0.0274	0.102	0.183	0.13	0.206	0.0688	0.159
1066	88057	APOE	613	cholesterol metabolic process	GO:0008203	biological process	137	8	0.137	0.157	0.105	0.61	0.0295	0.1	0.186	0.125	0.197	0.0657	0.167
1067	88057	APOE	613	long-term memory	GO:0007616	biological process	137	2	0.141	0.162	0.112	0.603	0.014	0.122	0.164	0.137	0.191	0.0903	0.138
1068	88057	APOE	613	glutamatergic synapse	GO:0098978	cellular component	137	9	0.144	0.17	0.114	0.598	0.019	0.118	0.176	0.158	0.184	0.0846	0.154
1069	88057	APOE	613	positive regulation of nitric-oxide synthase activity	GO:0051000	biological process	137	3	0.148	0.172	0.116	0.593	0.0319	0.106	0.206	0.137	0.217	0.0729	0.186
1070	88057	APOE	613	regulation of protein-containing complex assembly	GO:0043254	biological process	137	43	0.151	0.17	0.121	0.588	0.0313	0.108	0.21	0.127	0.226	0.0767	0.19
1071	88057	APOE	613	tau protein binding	GO:0048156	molecular function	137	2	0.157	0.178	0.128	0.578	0.0295	0.116	0.213	0.143	0.221	0.0823	0.2
1072	88057	APOE	613	extracellular region	GO:0005576	cellular component	137	16	0.166	0.185	0.138	0.565	0.037	0.112	0.247	0.132	0.261	0.079	0.239
1073	88057	APOE	613	high-density lipoprotein particle clearance	GO:0034384	biological process	137	2	0.166	0.182	0.141	0.565	0.0164	0.14	0.198	0.15	0.221	0.111	0.178
1074	88057	APOE	613	G protein-coupled receptor signaling pathway	GO:0007186	biological process	137	48	0.167	0.185	0.139	0.564	0.0323	0.118	0.236	0.137	0.25	0.0859	0.225
1075	88057	APOE	613	positive regulation of heparan sulfate binding	GO:1905855	biological process	137	3	0.168	0.185	0.141	0.564	0.0209	0.135	0.209	0.157	0.218	0.106	0.189
1076	88057	APOE	613	very-low-density lipoprotein particle clearance	GO:0034447	biological process	137	2	0.169	0.183	0.143	0.562	0.0161	0.142	0.2	0.151	0.222	0.114	0.18
1077	88057	APOE	613	lipoprotein biosynthetic process	GO:0042158	biological process	137	7	0.183	0.2	0.16	0.543	0.0167	0.154	0.219	0.172	0.233	0.127	0.201
1078	88057	APOE	613	extracellular exosome	GO:0070062	cellular component	137	162	0.193	0.21	0.171	0.531	0.0206	0.157	0.239	0.177	0.249	0.131	0.223
1079	88057	APOE	613	lipoprotein catabolic process	GO:0042159	biological process	137	5	0.198	0.214	0.165	0.523	0.0694	0.0958	0.41	0.115	0.398	0.0607	0.448
1080	88057	APOE	613	triglyceride metabolic process	GO:0006641	biological process	137	6	0.202	0.218	0.182	0.521	0.005	0.192	0.213	0.209	0.227	0.17	0.194
1081	88057	APOE	613	membrane	GO:0016020	cellular component	137	157	0.203	0.218	0.182	0.52	0.0109	0.181	0.226	0.2	0.238	0.158	0.209
1082	88057	APOE	613	long-chain fatty acid transport	GO:0015909	biological process	137	7	0.214	0.224	0.194	0.508	0.00685	0.198	0.23	0.211	0.238	0.177	0.212
1083	88057	APOE	613	negative regulation of cholesterol biosynthetic process	GO:0045541	biological process	137	5	0.219	0.229	0.2	0.503	0.00339	0.211	0.227	0.218	0.242	0.192	0.209
1084	88057	APOE	613	endoplasmic reticulum	GO:0005783	cellular component	137	62	0.223	0.236	0.204	0.497	0.024	0.174	0.286	0.188	0.296	0.15	0.277
1085	88057	APOE	613	nitric oxide mediated signal transduction	GO:0007263	biological process	137	4	0.231	0.244	0.212	0.49	0.0243	0.18	0.297	0.197	0.301	0.156	0.288
1086	88057	APOE	613	identical protein binding	GO:0042802	molecular function	137	79	0.24	0.251	0.223	0.481	0.0174	0.202	0.286	0.215	0.292	0.181	0.275
1087	88057	APOE	613	negative regulation of canonical Wnt signaling pathway	GO:0090090	biological process	137	21	0.246	0.257	0.228	0.474	0.0332	0.176	0.343	0.191	0.346	0.154	0.336
1088	88057	APOE	613	regulation of cholesterol metabolic process	GO:0090181	biological process	137	7	0.246	0.253	0.23	0.475	0.0175	0.206	0.294	0.212	0.303	0.187	0.283
1089	88057	APOE	613	positive regulation of transcription, DNA-templated	GO:0045893	biological process	137	49	0.262	0.273	0.245	0.459	0.0349	0.186	0.367	0.201	0.371	0.167	0.36
1090	88057	APOE	613	protein binding	GO:0005515	molecular function	137	831	0.265	0.273	0.25	0.458	0.00905	0.242	0.289	0.255	0.293	0.225	0.278
1091	88057	APOE	613	lipid transporter activity	GO:0005319	molecular function	137	20	0.277	0.299	0.249	0.439	0.0796	0.127	0.607	0.156	0.572	0.0952	0.652
1092	88057	APOE	613	protein homodimerization activity	GO:0042803	molecular function	137	34	0.288	0.291	0.275	0.437	0.00935	0.263	0.314	0.27	0.315	0.249	0.305
1093	88057	APOE	613	neuron projection development	GO:0031175	biological process	137	12	0.299	0.305	0.282	0.423	0.0531	0.178	0.505	0.19	0.489	0.154	0.518
1094	88057	APOE	613	cholesterol homeostasis	GO:0042632	biological process	137	6	0.307	0.31	0.296	0.421	0.0171	0.261	0.361	0.267	0.359	0.247	0.354
1095	88057	APOE	613	locomotory exploration behavior	GO:0035641	biological process	137	3	0.321	0.327	0.311	0.41	0.00874	0.296	0.348	0.299	0.358	0.284	0.34
1096	88057	APOE	613	response to caloric restriction	GO:0061771	biological process	137	4	0.346	0.35	0.336	0.388	0.0369	0.244	0.49	0.251	0.487	0.229	0.493
1097	88057	APOE	613	nucleus	GO:0005634	cellular component	137	200	0.364	0.369	0.357	0.377	0.0122	0.327	0.405	0.338	0.404	0.318	0.401
1098	88057	APOE	613	antioxidant activity	GO:0016209	molecular function	137	11	0.454	0.453	0.449	0.313	0.0323	0.348	0.591	0.349	0.587	0.34	0.591
1099	1891247	OTOF	8515	presynaptic active zone membrane	GO:0048787	cellular component	8	2	0.0733	0.0877	0.0245	0.798	0.0451	0.0574	0.0936	0.0433	0.178	0.0099	0.0604
1100	1891247	OTOF	8515	synaptic vesicle priming	GO:0016082	biological process	8	3	0.0816	0.102	0.0419	0.734	0.0248	0.0662	0.101	0.0554	0.187	0.0252	0.0697
1101	1891247	OTOF	8515	AP-2 adaptor complex binding	GO:0035612	molecular function	8	3	0.0921	0.0937	0.045	0.716	0.0651	0.05	0.17	0.0407	0.216	0.0138	0.147
1102	1891247	OTOF	8515	synaptic vesicle membrane	GO:0030672	cellular component	8	6	0.122	0.142	0.0883	0.637	0.0215	0.0967	0.153	0.0944	0.214	0.0617	0.126
1103	1891247	OTOF	8515	plasma membrane organization	GO:0007009	biological process	8	12	0.172	0.167	0.144	0.556	0.0426	0.11	0.27	0.0879	0.318	0.08	0.26
1104	1891247	OTOF	8515	calcium ion binding	GO:0005509	molecular function	8	19	0.204	0.178	0.178	0.516	0.0513	0.12	0.347	0.091	0.349	0.091	0.349
1105	94866	DBP	2697	DNA-binding transcription factor activity, RNA polymerase II-specific	GO:0000981	molecular function	28	47	0.0639	0.0155	0.0085	0.919	0.00512	0.0632	0.0646	0.0133	0.0181	0.00737	0.00981
1106	94866	DBP	2697	RNA polymerase II cis-regulatory region sequence-specific DNA binding	GO:0000978	molecular function	28	56	0.0639	0.0155	0.0102	0.902	0.00658	0.0632	0.0646	0.0133	0.0181	0.00878	0.0118
1107	94866	DBP	2697	positive regulation of transcription by RNA polymerase II	GO:0045944	biological process	28	70	0.0639	0.0155	0.0105	0.898	0.0113	0.0632	0.0646	0.0133	0.0181	0.00805	0.0138
1108	94866	DBP	2697	DNA-binding transcription activator activity, RNA polymerase II-specific	GO:0001228	molecular function	28	16	0.0639	0.0155	0.012	0.884	0.00587	0.0632	0.0646	0.0133	0.0181	0.0108	0.0133
1109	94866	DBP	2697	sequence-specific double-stranded DNA binding	GO:1990837	molecular function	28	31	0.0639	0.0155	0.0122	0.881	0.013	0.0632	0.0646	0.0133	0.0181	0.00955	0.0156
1110	94866	DBP	2697	RNA polymerase II transcription regulatory region sequence-specific DNA binding	GO:0000977	molecular function	28	14	0.0639	0.0155	0.0126	0.878	0.00574	0.0632	0.0646	0.0133	0.0181	0.0113	0.014
1111	94866	DBP	2697	nucleus	GO:0005634	cellular component	28	200	0.0639	0.0155	0.0137	0.867	0.0128	0.0632	0.0646	0.0133	0.0181	0.0109	0.0173
1112	94866	DBP	2697	regulation of transcription by RNA polymerase II	GO:0006357	biological process	28	76	0.0639	0.0157	0.0157	0.85	0.00748	0.0632	0.0646	0.0136	0.0181	0.0136	0.0181
1113	2684927	CENPJ	17272	gamma-tubulin binding	GO:0043015	molecular function	39	5	0.0639	0.0588	0.0104	0.889	0.0254	0.0632	0.0646	0.0477	0.0726	0.00543	0.02
1114	2684927	CENPJ	17272	astral microtubule nucleation	GO:0030954	biological process	39	3	0.0639	0.0588	0.0139	0.865	0.00858	0.0632	0.0646	0.0477	0.0726	0.012	0.0163
1115	2684927	CENPJ	17272	regulation of centriole replication	GO:0046599	biological process	39	5	0.0639	0.0588	0.014	0.863	0.0229	0.0632	0.0646	0.0477	0.0726	0.00877	0.0222
1116	2684927	CENPJ	17272	cilium assembly	GO:0060271	biological process	39	10	0.0639	0.0588	0.0151	0.854	0.0127	0.0632	0.0646	0.0477	0.0726	0.012	0.019
1117	2684927	CENPJ	17272	tubulin binding	GO:0015631	molecular function	39	9	0.0648	0.0588	0.0173	0.838	0.0229	0.0626	0.0671	0.0477	0.0726	0.011	0.0272
1118	2684927	CENPJ	17272	centriole replication	GO:0007099	biological process	39	3	0.0657	0.0588	0.0238	0.8	0.00498	0.0647	0.0667	0.0477	0.0726	0.0214	0.0264
1119	2684927	CENPJ	17272	centriole	GO:0005814	cellular component	39	5	0.0664	0.0588	0.0224	0.807	0.0151	0.0623	0.0707	0.0477	0.0726	0.0163	0.0309
1120	2684927	CENPJ	17272	positive regulation of centriole elongation	GO:1903724	biological process	39	3	0.068	0.0588	0.0243	0.798	0.019	0.0642	0.072	0.0477	0.0726	0.0163	0.0362
1121	2684927	CENPJ	17272	centrosome	GO:0005813	cellular component	39	32	0.068	0.0588	0.026	0.79	0.0161	0.061	0.0759	0.0477	0.0726	0.0183	0.0367
1122	2684927	CENPJ	17272	protein kinase binding	GO:0019901	molecular function	39	38	0.0705	0.0635	0.0304	0.773	0.00782	0.0668	0.0744	0.0586	0.0687	0.0257	0.036
1123	2684927	CENPJ	17272	microtubule polymerization	GO:0046785	biological process	39	5	0.0725	0.0637	0.0261	0.791	0.0366	0.0616	0.0853	0.0453	0.0895	0.0124	0.0549
1124	2684927	CENPJ	17272	centriole elongation	GO:0061511	biological process	39	3	0.0743	0.0637	0.0335	0.761	0.0181	0.0641	0.086	0.0453	0.0895	0.0229	0.0491
1125	2684927	CENPJ	17272	positive regulation of receptor signaling pathway via JAK-STAT	GO:0046427	biological process	39	3	0.0817	0.0684	0.0393	0.74	0.0365	0.0586	0.114	0.0427	0.11	0.0192	0.0804
1126	2684927	CENPJ	17272	positive regulation of establishment of protein localization	GO:1904951	biological process	39	6	0.0863	0.0738	0.0481	0.718	0.0184	0.0717	0.104	0.0545	0.1	0.0339	0.0681
1127	2684927	CENPJ	17272	identical protein binding	GO:0042802	molecular function	39	79	0.0969	0.0877	0.0607	0.689	0.00946	0.0879	0.107	0.0773	0.0995	0.0512	0.0721
1128	2684927	CENPJ	17272	transcription coactivator activity	GO:0003713	molecular function	39	7	0.101	0.0929	0.0645	0.68	0.0209	0.0807	0.126	0.07	0.123	0.0446	0.0933
1129	2684927	CENPJ	17272	protein domain specific binding	GO:0019904	molecular function	39	86	0.102	0.0847	0.0652	0.678	0.0291	0.0753	0.139	0.0608	0.118	0.0392	0.108
1130	2684927	CENPJ	17272	cytoplasm	GO:0005737	cellular component	39	202	0.131	0.118	0.0997	0.62	0.00746	0.12	0.143	0.108	0.128	0.0883	0.112
1131	2684927	CENPJ	17272	nucleoplasm	GO:0005654	cellular component	39	161	0.138	0.118	0.107	0.609	0.00735	0.127	0.149	0.109	0.128	0.0957	0.12
1132	2684927	CENPJ	17272	nucleus	GO:0005634	cellular component	39	200	0.138	0.118	0.107	0.609	0.00767	0.127	0.149	0.109	0.128	0.0953	0.121
1133	2684927	CENPJ	17272	protein binding	GO:0005515	molecular function	39	831	0.144	0.119	0.115	0.599	0.00607	0.135	0.153	0.11	0.128	0.105	0.126
1134	2684927	CENPJ	17272	plasma membrane	GO:0005886	cellular component	39	175	0.155	0.128	0.128	0.581	0.0077	0.143	0.168	0.114	0.143	0.114	0.143
1135	1915166	PLPP3	9229	integral component of membrane	GO:0016021	cellular component	41	33	0.0639	0.101	0.0158	0.849	0.00798	0.0632	0.0646	0.0786	0.131	0.0136	0.0184
1136	1915166	PLPP3	9229	sphingosine-1-phosphate phosphatase activity	GO:0042392	molecular function	41	3	0.0639	0.101	0.0148	0.857	0.0174	0.0632	0.0646	0.0786	0.131	0.0107	0.0206
1137	1915166	PLPP3	9229	ceramide-1-phosphate phosphatase activity	GO:0106235	molecular function	41	2	0.0641	0.101	0.0175	0.836	0.0143	0.0639	0.0643	0.0786	0.131	0.0132	0.0232
1138	1915166	PLPP3	9229	phosphatidate phosphatase activity	GO:0008195	molecular function	41	5	0.0644	0.101	0.0186	0.829	0.0173	0.0637	0.0651	0.0786	0.131	0.0132	0.0261
1139	1915166	PLPP3	9229	canonical Wnt signaling pathway involved in positive regulation of cell-cell adhesion	GO:0044329	biological process	41	2	0.0678	0.101	0.0231	0.804	0.0211	0.0618	0.0743	0.0786	0.131	0.0148	0.0362
1140	1915166	PLPP3	9229	canonical Wnt signaling pathway involved in positive regulation of wound healing	GO:0044330	biological process	41	2	0.068	0.101	0.0249	0.795	0.0164	0.0636	0.0727	0.0786	0.131	0.0176	0.0353
1141	1915166	PLPP3	9229	canonical Wnt signaling pathway involved in positive regulation of endothelial cell migration	GO:0044328	biological process	41	2	0.069	0.101	0.0244	0.798	0.0248	0.0608	0.0783	0.0786	0.131	0.0145	0.0411
1142	1915166	PLPP3	9229	lipid phosphatase activity	GO:0042577	molecular function	41	8	0.074	0.102	0.0322	0.766	0.0219	0.0636	0.0861	0.079	0.131	0.0202	0.0512
1143	1915166	PLPP3	9229	phospholipid dephosphorylation	GO:0046839	biological process	41	9	0.0773	0.105	0.0369	0.75	0.0192	0.0657	0.0909	0.0871	0.127	0.0248	0.055
1144	1915166	PLPP3	9229	retrograde vesicle-mediated transport, Golgi to endoplasmic reticulum	GO:0006890	biological process	41	6	0.0779	0.114	0.0375	0.747	0.0261	0.0619	0.098	0.107	0.122	0.0218	0.0642
1145	1915166	PLPP3	9229	endoplasmic reticulum-Golgi intermediate compartment membrane	GO:0033116	cellular component	41	2	0.081	0.113	0.0428	0.733	0.00942	0.0749	0.0877	0.105	0.122	0.0354	0.0517
1146	1915166	PLPP3	9229	integral component of plasma membrane	GO:0005887	cellular component	41	76	0.0823	0.117	0.0433	0.731	0.0219	0.0673	0.101	0.108	0.127	0.0283	0.0663
1147	1915166	PLPP3	9229	phospholipid metabolic process	GO:0006644	biological process	41	29	0.0878	0.118	0.0507	0.713	0.00458	0.0848	0.091	0.111	0.126	0.0464	0.0553
1148	1915166	PLPP3	9229	sphingosine metabolic process	GO:0006670	biological process	41	6	0.0961	0.129	0.0575	0.694	0.0334	0.068	0.136	0.0948	0.176	0.0315	0.105
1149	1915166	PLPP3	9229	canonical Wnt signaling pathway	GO:0060070	biological process	41	27	0.103	0.132	0.066	0.677	0.0241	0.0788	0.133	0.103	0.17	0.0425	0.102
1150	1915166	PLPP3	9229	Golgi apparatus	GO:0005794	cellular component	41	55	0.106	0.134	0.0704	0.669	0.0215	0.0858	0.132	0.101	0.176	0.0487	0.102
1151	1915166	PLPP3	9229	cell-cell adhesion mediated by integrin	GO:0033631	biological process	41	3	0.108	0.134	0.0719	0.665	0.0238	0.0836	0.139	0.101	0.177	0.0479	0.108
1152	1915166	PLPP3	9229	basolateral plasma membrane	GO:0016323	cellular component	41	12	0.108	0.136	0.0717	0.666	0.0265	0.0824	0.141	0.0997	0.185	0.0457	0.113
1153	1915166	PLPP3	9229	homotypic cell-cell adhesion	GO:0034109	biological process	41	6	0.12	0.144	0.0864	0.639	0.0261	0.091	0.159	0.108	0.192	0.0564	0.132
1154	1915166	PLPP3	9229	membrane	GO:0016020	cellular component	41	157	0.138	0.171	0.105	0.609	0.0314	0.0992	0.191	0.122	0.239	0.065	0.17
1155	1915166	PLPP3	9229	membrane raft	GO:0045121	cellular component	41	17	0.165	0.198	0.138	0.568	0.0215	0.132	0.206	0.155	0.252	0.102	0.186
1156	1915166	PLPP3	9229	protein binding	GO:0005515	molecular function	41	831	0.197	0.222	0.174	0.527	0.0278	0.148	0.263	0.173	0.285	0.122	0.248
1157	1915166	PLPP3	9229	ceramide metabolic process	GO:0006672	biological process	41	8	0.205	0.232	0.184	0.518	0.00585	0.193	0.217	0.21	0.256	0.171	0.199
1158	1915166	PLPP3	9229	positive regulation of DNA-binding transcription factor activity	GO:0051091	biological process	41	12	0.209	0.238	0.187	0.514	0.0215	0.167	0.261	0.191	0.297	0.142	0.247
1159	1915166	PLPP3	9229	integrin binding	GO:0005178	molecular function	41	13	0.222	0.254	0.202	0.499	0.0303	0.162	0.303	0.198	0.326	0.14	0.291
1160	1915166	PLPP3	9229	integrin-mediated signaling pathway	GO:0007229	biological process	41	4	0.223	0.254	0.204	0.497	0.0264	0.17	0.293	0.198	0.326	0.148	0.28
1161	1915166	PLPP3	9229	signal transduction	GO:0007165	biological process	41	62	0.241	0.261	0.219	0.478	0.0477	0.148	0.394	0.17	0.401	0.119	0.403
1162	1915166	PLPP3	9229	protein stabilization	GO:0050821	biological process	41	11	0.285	0.303	0.273	0.439	0.0183	0.239	0.341	0.272	0.337	0.223	0.333
1163	1915166	PLPP3	9229	trans-Golgi network	GO:0005802	cellular component	41	8	0.296	0.322	0.283	0.43	0.022	0.241	0.365	0.279	0.373	0.225	0.358
1164	1915166	PLPP3	9229	endoplasmic reticulum exit site	GO:0070971	cellular component	41	2	0.306	0.315	0.294	0.421	0.0227	0.245	0.381	0.256	0.387	0.23	0.376
1165	1915166	PLPP3	9229	negative regulation of protein phosphorylation	GO:0001933	biological process	41	17	0.592	0.589	0.589	0.221	0.0507	0.435	0.805	0.432	0.804	0.432	0.804
1166	1195462	GFRA2	4244	glial cell-derived neurotrophic factor receptor activity	GO:0016167	molecular function	9	2	0.0639	0.0248	0.00917	0.902	0.0208	0.0632	0.0646	0.0174	0.0353	0.00487	0.0173
1167	1195462	GFRA2	4244	signaling receptor activity	GO:0038023	molecular function	9	35	0.0639	0.0249	0.0135	0.868	0.00535	0.0632	0.0646	0.0175	0.0353	0.0123	0.015
1168	1195462	GFRA2	4244	receptor complex	GO:0043235	cellular component	9	34	0.0641	0.0249	0.0155	0.852	0.019	0.0631	0.0651	0.0175	0.0353	0.0108	0.0223
1169	1195462	GFRA2	4244	nervous system development	GO:0007399	biological process	9	4	0.0794	0.047	0.0412	0.738	0.00385	0.077	0.0818	0.0417	0.053	0.0382	0.0445
1170	1195462	GFRA2	4244	external side of plasma membrane	GO:0009897	cellular component	9	10	0.0936	0.0486	0.0358	0.746	0.0786	0.0594	0.148	0.0178	0.133	0.00751	0.171
1171	95523	FGFR2	3689	fibroblast growth factor-activated receptor activity	GO:0005007	molecular function	42	4	0.0639	0.0325	0.00565	0.943	0.00488	0.0632	0.0646	0.0308	0.0342	0.00421	0.0076
1172	95523	FGFR2	3689	transmembrane receptor protein tyrosine kinase signaling pathway	GO:0007169	biological process	42	27	0.0639	0.0325	0.00676	0.934	0.00526	0.0632	0.0646	0.0308	0.0342	0.00548	0.00833
1173	95523	FGFR2	3689	positive regulation of MAPK cascade	GO:0043410	biological process	42	20	0.0639	0.0325	0.00739	0.923	0.0136	0.0632	0.0646	0.0308	0.0342	0.00418	0.013
1174	95523	FGFR2	3689	receptor complex	GO:0043235	cellular component	42	34	0.0639	0.0325	0.0097	0.899	0.0227	0.0632	0.0646	0.0308	0.0342	0.00558	0.0169
1175	95523	FGFR2	3689	peptidyl-tyrosine phosphorylation	GO:0018108	biological process	42	10	0.0639	0.0325	0.0106	0.898	0.00779	0.0632	0.0646	0.0308	0.0342	0.00892	0.0127
1176	95523	FGFR2	3689	transmembrane receptor protein tyrosine kinase activity	GO:0004714	molecular function	42	23	0.0639	0.0325	0.0121	0.884	0.00285	0.0632	0.0646	0.0308	0.0342	0.0114	0.0127
1177	95523	FGFR2	3689	cell cortex	GO:0005938	cellular component	42	8	0.0639	0.0325	0.013	0.875	0.00588	0.0632	0.0646	0.0308	0.0342	0.0117	0.0144
1178	95523	FGFR2	3689	protein autophosphorylation	GO:0046777	biological process	42	15	0.0639	0.0325	0.0137	0.867	0.00539	0.0632	0.0646	0.0308	0.0342	0.0124	0.0151
1179	95523	FGFR2	3689	fibroblast growth factor binding	GO:0017134	molecular function	42	6	0.0639	0.0325	0.015	0.855	0.00897	0.0632	0.0646	0.0308	0.0342	0.0127	0.0177
1180	95523	FGFR2	3689	positive regulation of phospholipase activity	GO:0010518	biological process	42	8	0.0639	0.0325	0.0151	0.854	0.0109	0.0632	0.0646	0.0308	0.0342	0.0123	0.0186
1181	95523	FGFR2	3689	embryonic cranial skeleton morphogenesis	GO:0048701	biological process	42	2	0.0639	0.0326	0.0165	0.843	0.0129	0.0632	0.0646	0.031	0.0343	0.0129	0.0211
1182	95523	FGFR2	3689	collagen-containing extracellular matrix	GO:0062023	cellular component	42	28	0.0642	0.0345	0.0189	0.827	0.0117	0.0641	0.0643	0.0315	0.0378	0.015	0.0238
1183	95523	FGFR2	3689	negative regulation of keratinocyte proliferation	GO:0010839	biological process	42	3	0.0647	0.0357	0.0219	0.81	0.000903	0.064	0.0654	0.0338	0.0377	0.0215	0.0223
1184	95523	FGFR2	3689	fibroblast growth factor receptor signaling pathway	GO:0008543	biological process	42	21	0.0648	0.0349	0.0216	0.811	0.00739	0.0642	0.0654	0.0323	0.0376	0.0185	0.0252
1185	95523	FGFR2	3689	multicellular organism development	GO:0007275	biological process	42	17	0.0716	0.0451	0.0262	0.79	0.0315	0.0612	0.0839	0.031	0.0656	0.0137	0.05
1186	95523	FGFR2	3689	positive regulation of cell population proliferation	GO:0008284	biological process	42	46	0.0745	0.0462	0.0316	0.768	0.0287	0.0631	0.0878	0.0328	0.0653	0.0172	0.0581
1187	95523	FGFR2	3689	integral component of plasma membrane	GO:0005887	cellular component	42	76	0.0794	0.056	0.0406	0.74	0.00885	0.0729	0.0865	0.047	0.0668	0.034	0.0485
1188	95523	FGFR2	3689	positive regulation of kinase activity	GO:0033674	biological process	42	17	0.0873	0.0607	0.0462	0.721	0.0352	0.0624	0.122	0.0339	0.109	0.0234	0.091
1189	95523	FGFR2	3689	cell surface	GO:0009986	cellular component	42	30	0.11	0.0928	0.0753	0.66	0.00269	0.107	0.114	0.0857	0.1	0.0719	0.0789
1190	95523	FGFR2	3689	protein binding	GO:0005515	molecular function	42	831	0.121	0.101	0.0878	0.639	0.0077	0.112	0.131	0.0886	0.115	0.077	0.1
1191	95523	FGFR2	3689	protein homodimerization activity	GO:0042803	molecular function	42	34	0.139	0.118	0.109	0.606	0.00281	0.134	0.144	0.111	0.125	0.105	0.114
1192	95523	FGFR2	3689	cytoplasm	GO:0005737	cellular component	42	202	0.145	0.121	0.116	0.597	0.0108	0.129	0.163	0.108	0.135	0.0982	0.136
1193	95523	FGFR2	3689	nucleus	GO:0005634	cellular component	42	200	0.152	0.126	0.125	0.586	0.00197	0.149	0.156	0.119	0.134	0.121	0.128
1194	104876	HES5	19764	positive regulation of smooth muscle cell proliferation	GO:0048661	biological process	17	5	0.0639	0.0471	0.00825	0.923	0.0031	0.0632	0.0646	0.0399	0.0555	0.00755	0.009
1195	104876	HES5	19764	anterior/posterior pattern specification	GO:0009952	biological process	17	17	0.0648	0.0471	0.0174	0.839	0.0225	0.0626	0.0671	0.0399	0.0555	0.0112	0.027
1196	104876	HES5	19764	sequence-specific double-stranded DNA binding	GO:1990837	molecular function	17	31	0.0654	0.0471	0.0196	0.823	0.02	0.062	0.0691	0.0399	0.0555	0.0129	0.0297
1197	104876	HES5	19764	negative regulation of stem cell differentiation	GO:2000737	biological process	17	7	0.0669	0.0477	0.0259	0.79	0.00469	0.0652	0.0686	0.0414	0.0549	0.0234	0.0288
1198	104876	HES5	19764	DNA-binding transcription factor activity, RNA polymerase II-specific	GO:0000981	molecular function	17	47	0.0684	0.0471	0.0244	0.797	0.0242	0.0602	0.0776	0.0399	0.0555	0.0146	0.0408
1199	104876	HES5	19764	neuronal stem cell population maintenance	GO:0097150	biological process	17	2	0.0699	0.0471	0.0287	0.779	0.0179	0.0625	0.0782	0.0399	0.0555	0.0196	0.042
1200	104876	HES5	19764	RNA polymerase II cis-regulatory region sequence-specific DNA binding	GO:0000978	molecular function	17	56	0.0702	0.0482	0.027	0.785	0.0277	0.0587	0.084	0.0396	0.0587	0.0151	0.0484
1201	104876	HES5	19764	Notch signaling pathway	GO:0007219	biological process	17	15	0.072	0.0486	0.0292	0.777	0.0217	0.0639	0.0812	0.0416	0.0569	0.0184	0.0464
1202	104876	HES5	19764	regulation of transcription by RNA polymerase II	GO:0006357	biological process	17	76	0.0735	0.0482	0.0325	0.764	0.0241	0.0612	0.0883	0.0396	0.0587	0.0197	0.0536
1203	104876	HES5	19764	regulation of neurogenesis	GO:0050767	biological process	17	6	0.0757	0.0486	0.0367	0.751	0.00661	0.0709	0.0809	0.0416	0.0569	0.032	0.042
1204	104876	HES5	19764	cartilage development	GO:0051216	biological process	17	6	0.0793	0.0496	0.0409	0.739	0.00499	0.0751	0.0838	0.044	0.0559	0.0371	0.0451
1205	104876	HES5	19764	positive regulation of cell population proliferation	GO:0008284	biological process	17	46	0.0814	0.054	0.0418	0.734	0.0251	0.0639	0.104	0.0393	0.0743	0.0256	0.0684
1206	104876	HES5	19764	nucleus	GO:0005634	cellular component	17	200	0.117	0.0837	0.0837	0.645	0.00985	0.107	0.129	0.0709	0.0988	0.0709	0.0988
1207	2149635	SLC13A3	14430	dicarboxylic acid transmembrane transporter activity	GO:0005310	molecular function	31	19	0.0639	0.0489	0.0134	0.87	0.0182	0.0632	0.0646	0.0423	0.0565	0.00947	0.019
1208	2149635	SLC13A3	14430	integral component of membrane	GO:0016021	cellular component	31	33	0.0639	0.0489	0.0163	0.844	0.00473	0.0632	0.0646	0.0423	0.0565	0.015	0.0179
1209	2149635	SLC13A3	14430	citrate transport	GO:0015746	biological process	31	6	0.0641	0.0489	0.0182	0.832	0.0122	0.0631	0.0651	0.0423	0.0565	0.0143	0.0231
1210	2149635	SLC13A3	14430	sodium:dicarboxylate symporter activity	GO:0017153	molecular function	31	7	0.0642	0.0489	0.0162	0.846	0.0214	0.063	0.0654	0.0423	0.0565	0.0108	0.0245
1211	2149635	SLC13A3	14430	succinate transmembrane transporter activity	GO:0015141	molecular function	31	7	0.0656	0.0489	0.0203	0.82	0.0193	0.0636	0.0678	0.0423	0.0565	0.0138	0.03
1212	2149635	SLC13A3	14430	alpha-ketoglutarate transmembrane transporter activity	GO:0015139	molecular function	31	5	0.0659	0.0489	0.0226	0.806	0.0143	0.0637	0.068	0.0423	0.0565	0.0167	0.0306
1213	2149635	SLC13A3	14430	citrate transmembrane transporter activity	GO:0015137	molecular function	31	5	0.0659	0.049	0.0234	0.802	0.0137	0.0623	0.0697	0.0424	0.0566	0.0175	0.0313
1214	2149635	SLC13A3	14430	succinate transmembrane transport	GO:0071422	biological process	31	4	0.0673	0.0504	0.026	0.79	0.00462	0.0655	0.069	0.0459	0.0554	0.0234	0.0289
1215	2149635	SLC13A3	14430	dicarboxylic acid transport	GO:0006835	biological process	31	20	0.069	0.0511	0.0281	0.781	0.00855	0.0654	0.0727	0.0453	0.0576	0.0233	0.0339
1216	2149635	SLC13A3	14430	anion transmembrane transport	GO:0098656	biological process	31	51	0.0775	0.0571	0.0386	0.746	0.00562	0.0734	0.0818	0.0495	0.066	0.0345	0.0432
1217	2149635	SLC13A3	14430	glutathione transmembrane transport	GO:0034775	biological process	31	5	0.0803	0.0599	0.0408	0.738	0.0182	0.0682	0.0944	0.0496	0.0724	0.028	0.0595
1218	2149635	SLC13A3	14430	glutathione transmembrane transporter activity	GO:0034634	molecular function	31	5	0.081	0.0616	0.0417	0.735	0.02	0.0685	0.0958	0.0466	0.0816	0.0278	0.0627
1219	2149635	SLC13A3	14430	basolateral plasma membrane	GO:0016323	cellular component	31	12	0.0983	0.0762	0.0619	0.687	0.00893	0.0907	0.107	0.065	0.0894	0.0528	0.0726
1220	2149635	SLC13A3	14430	plasma membrane	GO:0005886	cellular component	31	175	0.121	0.0973	0.0868	0.64	0.0156	0.103	0.141	0.078	0.121	0.067	0.112
1221	2149635	SLC13A3	14430	extracellular exosome	GO:0070062	cellular component	31	162	0.129	0.103	0.0968	0.624	0.0101	0.117	0.143	0.0877	0.122	0.0823	0.114
1222	2149635	SLC13A3	14430	protein binding	GO:0005515	molecular function	31	831	0.179	0.155	0.155	0.548	0.0131	0.156	0.206	0.13	0.186	0.13	0.186
1223	2442987	VWC2	30200	negative regulation of BMP signaling pathway	GO:0030514	biological process	7	10	0.0743	0.0676	0.0341	0.759	0.0171	0.0638	0.0865	0.051	0.0895	0.024	0.0486
1224	2442987	VWC2	30200	AMPA glutamate receptor complex	GO:0032281	cellular component	7	5	0.0808	0.0676	0.0425	0.734	0.00818	0.0759	0.0861	0.051	0.0895	0.0362	0.0499
1225	2442987	VWC2	30200	protein binding	GO:0005515	molecular function	7	831	0.097	0.0676	0.0609	0.689	0.0104	0.0879	0.107	0.051	0.0895	0.0504	0.0737
1226	2442987	VWC2	30200	extracellular space	GO:0005615	cellular component	7	54	0.0998	0.0676	0.0629	0.683	0.0227	0.0796	0.125	0.051	0.0895	0.0412	0.0959
1227	2146046	ADAMTS12	14605	extracellular matrix	GO:0031012	cellular component	19	21	0.0829	0.249	0.0325	0.758	0.0634	0.0496	0.139	0.205	0.303	0.00966	0.109
1228	2146046	ADAMTS12	14605	negative regulation of cellular response to vascular endothelial growth factor stimulus	GO:1902548	biological process	19	5	0.088	0.249	0.0506	0.713	0.00754	0.0816	0.0949	0.205	0.303	0.0438	0.0586
1229	2146046	ADAMTS12	14605	proteoglycan catabolic process	GO:0030167	biological process	19	4	0.112	0.262	0.0725	0.658	0.0528	0.0647	0.193	0.196	0.35	0.0303	0.173
1230	2146046	ADAMTS12	14605	proteolysis involved in cellular protein catabolic process	GO:0051603	biological process	19	14	0.12	0.259	0.0848	0.64	0.0376	0.0807	0.179	0.218	0.309	0.0461	0.156
1231	2146046	ADAMTS12	14605	regulation of inflammatory response	GO:0050727	biological process	19	12	0.137	0.267	0.102	0.608	0.0534	0.0785	0.24	0.204	0.35	0.0466	0.224
1232	2146046	ADAMTS12	14605	extracellular matrix organization	GO:0030198	biological process	19	17	0.148	0.28	0.111	0.593	0.0633	0.0773	0.284	0.218	0.359	0.0418	0.292
1233	2146046	ADAMTS12	14605	negative regulation of hepatocyte growth factor receptor signaling pathway	GO:1902203	biological process	19	3	0.148	0.277	0.119	0.592	0.0143	0.128	0.172	0.252	0.304	0.096	0.148
1234	2146046	ADAMTS12	14605	negative regulation of cellular response to hepatocyte growth factor stimulus	GO:2001113	biological process	19	3	0.155	0.277	0.127	0.583	0.00888	0.142	0.169	0.252	0.304	0.112	0.145
1235	2146046	ADAMTS12	14605	cell migration	GO:0016477	biological process	19	50	0.166	0.278	0.14	0.566	0.0129	0.145	0.19	0.254	0.305	0.117	0.169
1236	2146046	ADAMTS12	14605	metalloendopeptidase activity	GO:0004222	molecular function	19	9	0.172	0.291	0.145	0.558	0.0285	0.128	0.231	0.241	0.351	0.0972	0.216
1237	2146046	ADAMTS12	14605	negative regulation of chondrocyte differentiation	GO:0032331	biological process	19	5	0.18	0.32	0.149	0.548	0.0497	0.107	0.302	0.26	0.393	0.073	0.306
1238	2146046	ADAMTS12	14605	regulation of endothelial tube morphogenesis	GO:1901509	biological process	19	4	0.277	0.37	0.261	0.444	0.0392	0.19	0.403	0.322	0.426	0.171	0.399
1239	2146046	ADAMTS12	14605	cellular response to BMP stimulus	GO:0071773	biological process	19	6	0.329	0.411	0.32	0.404	0.00657	0.309	0.351	0.377	0.447	0.299	0.342
1240	2146046	ADAMTS12	14605	cellular response to interleukin-1	GO:0071347	biological process	19	3	0.38	0.442	0.373	0.364	0.0227	0.312	0.464	0.427	0.458	0.302	0.461
1241	2146046	ADAMTS12	14605	protein binding	GO:0005515	molecular function	19	831	0.392	0.43	0.386	0.356	0.0169	0.338	0.455	0.368	0.502	0.33	0.452
1242	2146046	ADAMTS12	14605	cell-matrix adhesion	GO:0007160	biological process	19	10	0.446	0.474	0.441	0.318	0.0347	0.332	0.6	0.377	0.597	0.324	0.601
1243	2146046	ADAMTS12	14605	cellular response to tumor necrosis factor	GO:0071356	biological process	19	4	0.482	0.489	0.479	0.295	0.0305	0.381	0.61	0.396	0.605	0.376	0.609
1244	1924066	SDCCAG8	10671	establishment of cell polarity	GO:0030010	biological process	20	12	0.0639	0.0262	0.00608	0.932	0.0174	0.0632	0.0646	0.0225	0.0306	0.00315	0.0117
1245	1924066	SDCCAG8	10671	neuron migration	GO:0001764	biological process	20	11	0.0639	0.0262	0.00856	0.912	0.0176	0.0632	0.0646	0.0225	0.0306	0.00531	0.0138
1246	1924066	SDCCAG8	10671	microtubule organizing center organization	GO:0031023	biological process	20	10	0.0639	0.0262	0.012	0.883	0.0101	0.0632	0.0646	0.0225	0.0306	0.00988	0.0147
1247	1924066	SDCCAG8	10671	regulation of cilium assembly	GO:1902017	biological process	20	7	0.0639	0.0262	0.0123	0.881	0.00456	0.0632	0.0646	0.0225	0.0306	0.0114	0.0134
1248	1924066	SDCCAG8	10671	cell-cell junction	GO:0005911	cellular component	20	25	0.0639	0.0262	0.0152	0.853	0.0115	0.0632	0.0646	0.0225	0.0306	0.0123	0.0189
1249	1924066	SDCCAG8	10671	centriole	GO:0005814	cellular component	20	5	0.0643	0.028	0.0213	0.812	0.00303	0.0641	0.0646	0.0261	0.03	0.02	0.0226
1250	1924066	SDCCAG8	10671	centrosome	GO:0005813	cellular component	20	32	0.0644	0.028	0.0214	0.812	0.00482	0.0639	0.0649	0.0261	0.03	0.0194	0.0237
1251	1924066	SDCCAG8	10671	tube formation	GO:0035148	biological process	20	7	0.0913	0.0587	0.0522	0.706	0.0317	0.0659	0.127	0.0329	0.105	0.0293	0.0932
1252	1924066	SDCCAG8	10671	protein binding	GO:0005515	molecular function	20	831	0.155	0.128	0.128	0.581	0.00477	0.147	0.164	0.119	0.137	0.119	0.137
1253	95627	SLC6A1	11042	gamma-aminobutyric acid:sodium symporter activity	GO:0005332	molecular function	28	5	0.0639	0.0534	0.0131	0.871	0.0213	0.0632	0.0646	0.0471	0.0604	0.00863	0.02
1254	95627	SLC6A1	11042	sodium ion import across plasma membrane	GO:0098719	biological process	28	4	0.0639	0.0534	0.0134	0.869	0.0123	0.0632	0.0646	0.0471	0.0604	0.0107	0.0169
1255	95627	SLC6A1	11042	sodium ion transmembrane transport	GO:0035725	biological process	28	10	0.0641	0.0534	0.0195	0.823	0.0069	0.0632	0.0651	0.0471	0.0604	0.0168	0.0225
1256	95627	SLC6A1	11042	gamma-aminobutyric acid import	GO:0051939	biological process	28	4	0.0642	0.0534	0.0193	0.824	0.00754	0.0641	0.0643	0.0471	0.0604	0.0165	0.0226
1257	95627	SLC6A1	11042	chloride transmembrane transport	GO:1902476	biological process	28	5	0.0646	0.0534	0.0216	0.811	0.000785	0.0639	0.0653	0.0471	0.0604	0.0212	0.0219
1258	95627	SLC6A1	11042	inorganic anion import across plasma membrane	GO:0098658	biological process	28	4	0.0695	0.0551	0.0289	0.778	0.0134	0.0634	0.0762	0.046	0.066	0.0216	0.0385
1259	95627	SLC6A1	11042	sodium:chloride symporter activity	GO:0015378	molecular function	28	7	0.0718	0.0551	0.0319	0.767	0.013	0.0655	0.0788	0.046	0.066	0.0243	0.042
1260	95627	SLC6A1	11042	integral component of plasma membrane	GO:0005887	cellular component	28	76	0.0719	0.0551	0.032	0.767	0.00978	0.0668	0.0773	0.046	0.066	0.0259	0.0395
1261	95627	SLC6A1	11042	neuron projection	GO:0043005	cellular component	28	35	0.0764	0.0562	0.0375	0.749	0.013	0.0685	0.0851	0.0461	0.0686	0.0287	0.0489
1262	95627	SLC6A1	11042	axon	GO:0030424	cellular component	28	19	0.0802	0.0618	0.0421	0.735	0.00938	0.0732	0.0878	0.051	0.0748	0.0349	0.0506
1263	95627	SLC6A1	11042	plasma membrane	GO:0005886	cellular component	28	175	0.118	0.108	0.0845	0.644	0.0152	0.101	0.138	0.0835	0.139	0.0656	0.109
1264	95627	SLC6A1	11042	cell surface	GO:0009986	cellular component	28	30	0.146	0.134	0.115	0.597	0.02	0.119	0.179	0.0992	0.182	0.0851	0.156
1265	95627	SLC6A1	11042	protein binding	GO:0005515	molecular function	28	831	0.189	0.171	0.166	0.536	0.0149	0.162	0.221	0.145	0.202	0.136	0.203
1266	95627	SLC6A1	11042	response to inorganic substance	GO:0010035	biological process	28	31	0.224	0.209	0.204	0.497	0.0271	0.169	0.296	0.152	0.288	0.147	0.284
1267	1096355	S1PR1	3165	intrinsic component of plasma membrane	GO:0031226	cellular component	20	10	0.0643	0.133	0.018	0.833	0.013	0.0642	0.0644	0.0993	0.179	0.0139	0.0233
1268	1096355	S1PR1	3165	sphingosine-1-phosphate receptor signaling pathway	GO:0003376	biological process	20	4	0.0647	0.133	0.0201	0.82	0.0168	0.0639	0.0656	0.0993	0.179	0.0144	0.028
1269	1096355	S1PR1	3165	adenylate cyclase-activating G protein-coupled receptor signaling pathway	GO:0007189	biological process	20	17	0.0877	0.183	0.0502	0.714	0.0107	0.0778	0.0988	0.175	0.191	0.0407	0.0619
1270	1096355	S1PR1	3165	intracellular membrane-bounded organelle	GO:0043231	cellular component	20	80	0.1	0.197	0.064	0.682	0.0157	0.0862	0.117	0.177	0.219	0.0485	0.0843
1271	1096355	S1PR1	3165	plasma membrane	GO:0005886	cellular component	20	175	0.138	0.263	0.108	0.609	0.0109	0.124	0.154	0.242	0.286	0.0907	0.128
1272	1096355	S1PR1	3165	G protein-coupled receptor activity	GO:0004930	molecular function	20	56	0.165	0.287	0.136	0.567	0.038	0.11	0.247	0.215	0.383	0.0765	0.241
1273	1096355	S1PR1	3165	G protein-coupled receptor binding	GO:0001664	molecular function	20	47	0.207	0.324	0.186	0.515	0.0179	0.173	0.248	0.283	0.371	0.148	0.234
1274	1096355	S1PR1	3165	protein binding	GO:0005515	molecular function	20	831	0.216	0.324	0.196	0.505	0.0204	0.176	0.267	0.283	0.371	0.151	0.255
1275	1096355	S1PR1	3165	sphingosine-1-phosphate receptor activity	GO:0038036	molecular function	20	3	0.256	0.326	0.24	0.466	0.00632	0.24	0.272	0.287	0.369	0.223	0.259
1276	1096355	S1PR1	3165	cytoplasm	GO:0005737	cellular component	20	202	0.274	0.327	0.261	0.449	0.00914	0.251	0.3	0.286	0.374	0.236	0.289
1277	1096355	S1PR1	3165	nucleoplasm	GO:0005654	cellular component	20	161	0.302	0.336	0.29	0.425	0.0162	0.258	0.353	0.293	0.385	0.243	0.347
1278	1096355	S1PR1	3165	angiogenesis	GO:0001525	biological process	20	10	0.339	0.358	0.33	0.396	0.0124	0.302	0.38	0.34	0.377	0.291	0.374
1279	1096355	S1PR1	3165	regulation of metabolic process	GO:0019222	biological process	20	24	0.407	0.405	0.401	0.346	0.0212	0.34	0.487	0.341	0.482	0.332	0.484
1280	99517	HSPA1B	5233	misfolded protein binding	GO:0051787	molecular function	106	2	0.0639	0.048	0.00251	0.968	0.00315	0.0632	0.0646	0.0419	0.0551	0.00179	0.00353
1281	99517	HSPA1B	5233	unfolded protein binding	GO:0051082	molecular function	106	4	0.0639	0.048	0.00372	0.958	0.00407	0.0632	0.0646	0.0419	0.0551	0.00256	0.00541
1282	99517	HSPA1B	5233	aggresome	GO:0016235	cellular component	106	2	0.0639	0.048	0.00815	0.923	0.0022	0.0632	0.0646	0.0419	0.0551	0.00765	0.00868
1283	99517	HSPA1B	5233	positive regulation of microtubule nucleation	GO:0090063	biological process	106	4	0.0639	0.048	0.011	0.895	0.0062	0.0632	0.0646	0.0419	0.0551	0.00951	0.0126
1284	99517	HSPA1B	5233	protein N-terminus binding	GO:0047485	molecular function	106	6	0.0639	0.048	0.0112	0.889	0.0164	0.0632	0.0646	0.0419	0.0551	0.00772	0.0161
1285	99517	HSPA1B	5233	C3HC4-type RING finger domain binding	GO:0055131	molecular function	106	3	0.0639	0.048	0.0115	0.886	0.0216	0.0632	0.0646	0.0419	0.0551	0.00751	0.0177
1286	99517	HSPA1B	5233	chaperone cofactor-dependent protein refolding	GO:0051085	biological process	106	4	0.0639	0.048	0.0122	0.88	0.0168	0.0632	0.0646	0.0419	0.0551	0.00876	0.0171
1287	99517	HSPA1B	5233	cellular response to heat	GO:0034605	biological process	106	8	0.0639	0.048	0.0124	0.878	0.0167	0.0632	0.0646	0.0419	0.0551	0.00871	0.0175
1288	99517	HSPA1B	5233	regulation of protein ubiquitination	GO:0031396	biological process	106	9	0.0639	0.048	0.0128	0.875	0.00924	0.0632	0.0646	0.0419	0.0551	0.0107	0.0153
1289	99517	HSPA1B	5233	positive regulation of NF-kappaB transcription factor activity	GO:0051092	biological process	106	5	0.0639	0.048	0.0129	0.875	0.00289	0.0632	0.0646	0.0419	0.0551	0.0123	0.0135
1290	99517	HSPA1B	5233	negative regulation of protein ubiquitination	GO:0031397	biological process	106	9	0.0639	0.048	0.0134	0.87	0.0104	0.0632	0.0646	0.0419	0.0551	0.011	0.0163
1291	99517	HSPA1B	5233	heat shock protein binding	GO:0031072	molecular function	106	8	0.0639	0.048	0.0139	0.864	0.0171	0.0632	0.0646	0.0419	0.0551	0.01	0.0192
1292	99517	HSPA1B	5233	histone deacetylase binding	GO:0042826	molecular function	106	8	0.0639	0.048	0.0147	0.858	0.00756	0.0632	0.0646	0.0419	0.0551	0.0128	0.0168
1293	99517	HSPA1B	5233	regulation of mitotic spindle assembly	GO:1901673	biological process	106	4	0.0642	0.0493	0.0172	0.838	0.0135	0.0631	0.0653	0.0426	0.057	0.0132	0.0225
1294	99517	HSPA1B	5233	positive regulation of nucleotide-binding oligomerization domain containing 2 signaling pathway	GO:0070434	biological process	106	3	0.0642	0.05	0.0163	0.845	0.0168	0.0641	0.0643	0.0406	0.0616	0.0118	0.0227
1295	99517	HSPA1B	5233	RNA binding	GO:0003723	molecular function	106	82	0.0643	0.0491	0.0201	0.819	0.00825	0.063	0.0656	0.0412	0.0585	0.0169	0.0239
1296	99517	HSPA1B	5233	positive regulation of gene expression	GO:0010628	biological process	106	30	0.0644	0.0493	0.0173	0.837	0.0185	0.063	0.0658	0.0426	0.057	0.0121	0.0249
1297	99517	HSPA1B	5233	focal adhesion	GO:0005925	cellular component	106	30	0.0646	0.048	0.0176	0.837	0.0177	0.0627	0.0666	0.0419	0.0551	0.0123	0.025
1298	99517	HSPA1B	5233	cellular heat acclimation	GO:0070370	biological process	106	3	0.0646	0.048	0.0179	0.834	0.0171	0.0627	0.0666	0.0419	0.0551	0.0127	0.0252
1299	99517	HSPA1B	5233	positive regulation of interleukin-8 production	GO:0032757	biological process	106	4	0.0654	0.0504	0.0232	0.803	0.00693	0.0632	0.0677	0.0422	0.0601	0.02	0.0268
1300	99517	HSPA1B	5233	protein refolding	GO:0042026	biological process	106	3	0.0656	0.05	0.0196	0.823	0.0164	0.063	0.0682	0.0406	0.0616	0.0139	0.0276
1301	99517	HSPA1B	5233	centrosome	GO:0005813	cellular component	106	32	0.0657	0.0493	0.0187	0.829	0.0222	0.0619	0.0697	0.0426	0.057	0.0119	0.0293
1302	99517	HSPA1B	5233	enzyme binding	GO:0019899	molecular function	106	49	0.0657	0.05	0.0177	0.837	0.024	0.0629	0.0687	0.0406	0.0616	0.0109	0.0286
1303	99517	HSPA1B	5233	COP9 signalosome	GO:0008180	cellular component	106	7	0.0667	0.0513	0.0252	0.794	0.00535	0.065	0.0685	0.0418	0.0629	0.0224	0.0282
1304	99517	HSPA1B	5233	positive regulation of tumor necrosis factor-mediated signaling pathway	GO:1903265	biological process	106	3	0.0669	0.0514	0.0182	0.833	0.0288	0.0618	0.0725	0.0396	0.0667	0.0101	0.0328
1305	99517	HSPA1B	5233	vesicle	GO:0031982	cellular component	106	13	0.0677	0.0528	0.0238	0.8	0.0186	0.062	0.0739	0.0409	0.0682	0.016	0.0355
1306	99517	HSPA1B	5233	inclusion body	GO:0016234	cellular component	106	18	0.0679	0.0515	0.0139	0.859	0.0459	0.061	0.0756	0.0396	0.067	0.0049	0.0391
1307	99517	HSPA1B	5233	ubiquitin protein ligase binding	GO:0031625	molecular function	106	24	0.0687	0.0534	0.0286	0.779	0.00341	0.0673	0.0702	0.0465	0.0614	0.0266	0.0307
1308	99517	HSPA1B	5233	negative regulation of inclusion body assembly	GO:0090084	biological process	106	7	0.069	0.0527	0.0283	0.781	0.00653	0.0661	0.072	0.041	0.0678	0.0246	0.0325
1309	99517	HSPA1B	5233	negative regulation of extrinsic apoptotic signaling pathway in absence of ligand	GO:2001240	biological process	106	7	0.0691	0.0528	0.025	0.795	0.0228	0.0628	0.076	0.0409	0.0682	0.0155	0.0404
1310	99517	HSPA1B	5233	negative regulation of cell death	GO:0060548	biological process	106	10	0.0703	0.0577	0.0303	0.773	0.014	0.0635	0.0779	0.0519	0.0641	0.0225	0.0408
1311	99517	HSPA1B	5233	negative regulation of apoptotic process	GO:0043066	biological process	106	33	0.0713	0.0541	0.0288	0.779	0.0211	0.0633	0.0803	0.0408	0.0716	0.0185	0.0451
1312	99517	HSPA1B	5233	ribonucleoprotein complex	GO:1990904	cellular component	106	26	0.0716	0.0549	0.0294	0.776	0.0228	0.0601	0.0854	0.0397	0.0759	0.0182	0.0474
1313	99517	HSPA1B	5233	blood microparticle	GO:0072562	cellular component	106	4	0.074	0.0561	0.0332	0.762	0.0177	0.0643	0.0851	0.0409	0.0769	0.0228	0.0483
1314	99517	HSPA1B	5233	nuclear speck	GO:0016607	cellular component	106	17	0.0742	0.0615	0.0337	0.759	0.0245	0.0603	0.0913	0.0505	0.0748	0.0204	0.0559
1315	99517	HSPA1B	5233	centriole	GO:0005814	cellular component	106	5	0.0777	0.0628	0.0392	0.744	0.00383	0.0757	0.0797	0.0565	0.0699	0.0363	0.0423
1316	99517	HSPA1B	5233	positive regulation of proteasomal ubiquitin-dependent protein catabolic process	GO:0032436	biological process	106	11	0.0805	0.062	0.0401	0.74	0.0236	0.0655	0.0988	0.0404	0.0951	0.0247	0.065
1317	99517	HSPA1B	5233	positive regulation of erythrocyte differentiation	GO:0045648	biological process	106	3	0.0807	0.0621	0.0378	0.745	0.0352	0.0605	0.108	0.0392	0.0984	0.0186	0.0767
1318	99517	HSPA1B	5233	mRNA catabolic process	GO:0006402	biological process	106	9	0.0855	0.0655	0.045	0.725	0.0299	0.0652	0.112	0.0413	0.104	0.0248	0.0814
1319	99517	HSPA1B	5233	extracellular exosome	GO:0070062	cellular component	106	162	0.0866	0.0716	0.0492	0.716	0.00987	0.0774	0.0968	0.061	0.0839	0.0406	0.0596
1320	99517	HSPA1B	5233	protein stabilization	GO:0050821	biological process	106	11	0.0909	0.074	0.0534	0.706	0.0171	0.0776	0.107	0.0567	0.0966	0.0385	0.074
1321	99517	HSPA1B	5233	perinuclear region of cytoplasm	GO:0048471	cellular component	106	35	0.0934	0.0755	0.0549	0.7	0.028	0.0703	0.124	0.0501	0.114	0.032	0.0942
1322	99517	HSPA1B	5233	protein folding chaperone	GO:0044183	molecular function	106	2	0.0957	0.0789	0.0586	0.693	0.0208	0.0765	0.12	0.0589	0.106	0.0401	0.0856
1323	99517	HSPA1B	5233	cytosol	GO:0005829	cellular component	106	164	0.102	0.0869	0.0661	0.678	0.00951	0.0916	0.113	0.0735	0.103	0.0559	0.078
1324	99517	HSPA1B	5233	cytoplasm	GO:0005737	cellular component	106	202	0.103	0.0872	0.0676	0.675	0.0121	0.0902	0.118	0.0735	0.104	0.0547	0.0837
1325	99517	HSPA1B	5233	nucleus	GO:0005634	cellular component	106	200	0.104	0.0876	0.0683	0.674	0.00733	0.0954	0.112	0.0743	0.103	0.0601	0.0776
1326	99517	HSPA1B	5233	negative regulation of cell growth	GO:0030308	biological process	106	20	0.114	0.095	0.0794	0.652	0.0174	0.0939	0.138	0.0714	0.126	0.059	0.107
1327	99517	HSPA1B	5233	signaling receptor binding	GO:0005102	molecular function	106	73	0.115	0.0944	0.0782	0.652	0.0345	0.0811	0.163	0.0614	0.145	0.0424	0.145
1328	99517	HSPA1B	5233	protein binding	GO:0005515	molecular function	106	831	0.116	0.0977	0.0824	0.647	0.00547	0.11	0.123	0.0931	0.103	0.0751	0.0905
1329	99517	HSPA1B	5233	cellular response to unfolded protein	GO:0034620	biological process	106	5	0.119	0.101	0.0839	0.644	0.026	0.0896	0.157	0.0733	0.139	0.0536	0.131
1330	99517	HSPA1B	5233	ATP binding	GO:0005524	molecular function	106	17	0.119	0.0987	0.0851	0.642	0.023	0.0929	0.152	0.0727	0.134	0.0578	0.125
1331	99517	HSPA1B	5233	protein-containing complex	GO:0032991	cellular component	106	373	0.13	0.111	0.0973	0.623	0.019	0.106	0.158	0.0898	0.137	0.0712	0.133
1332	99517	HSPA1B	5233	plasma membrane	GO:0005886	cellular component	106	175	0.132	0.112	0.101	0.619	0.00463	0.125	0.139	0.101	0.125	0.0933	0.108
1333	99517	HSPA1B	5233	ATP metabolic process	GO:0046034	biological process	106	10	0.135	0.113	0.104	0.613	0.0175	0.112	0.163	0.0893	0.143	0.0786	0.138
1334	99517	HSPA1B	5233	negative regulation of cell population proliferation	GO:0008285	biological process	106	45	0.135	0.114	0.104	0.612	0.0222	0.107	0.172	0.0859	0.152	0.0735	0.148
1335	99517	HSPA1B	5233	G protein-coupled receptor binding	GO:0001664	molecular function	106	47	0.168	0.148	0.142	0.564	0.0131	0.147	0.191	0.124	0.176	0.118	0.17
1336	99517	HSPA1B	5233	ATPase activity	GO:0016887	molecular function	106	29	0.258	0.247	0.243	0.464	0.00804	0.237	0.28	0.225	0.27	0.221	0.267
1337	99517	HSPA1B	5233	vesicle-mediated transport	GO:0016192	biological process	106	32	0.281	0.268	0.268	0.444	0.000927	0.279	0.282	0.265	0.271	0.265	0.271
1338	1913764	ASRGL1	16448	asparagine catabolic process via L-aspartate	GO:0033345	biological process	9	2	0.0639	0.0246	0.011	0.893	0.0118	0.0632	0.0646	0.0208	0.0291	0.0085	0.0142
1339	1913764	ASRGL1	16448	beta-aspartyl-peptidase activity	GO:0008798	molecular function	9	3	0.0639	0.0246	0.0109	0.891	0.0205	0.0632	0.0646	0.0208	0.0291	0.00684	0.0172
1340	1913764	ASRGL1	16448	asparaginase activity	GO:0004067	molecular function	9	2	0.0639	0.027	0.0162	0.845	0.00592	0.0632	0.0646	0.0243	0.03	0.0146	0.018
1341	1913764	ASRGL1	16448	nucleus	GO:0005634	cellular component	9	200	0.0851	0.0551	0.0477	0.72	0.00202	0.083	0.0872	0.0473	0.0641	0.0458	0.0496
1342	1913764	ASRGL1	16448	cytoplasm	GO:0005737	cellular component	9	202	0.0916	0.0551	0.0548	0.703	0.00833	0.0832	0.101	0.0473	0.0641	0.0467	0.0643
1343	1298407	TSPAN7	11854	integral component of plasma membrane	GO:0005887	cellular component	7	76	0.0639	0.0391	0.0195	0.823	0.00106	0.0632	0.0646	0.0383	0.0399	0.0191	0.0199
1344	1298407	TSPAN7	11854	protein binding	GO:0005515	molecular function	7	831	0.0989	0.0625	0.0625	0.685	0.0163	0.0845	0.116	0.0467	0.0835	0.0467	0.0835
1345	2685341	GPR139	19995	G protein-coupled receptor signaling pathway	GO:0007186	biological process	1	48	0.0639	0.0102	0.0102	0.889	0.0245	0.0632	0.0646	0.00514	0.0203	0.00514	0.0203
1346	2449569	ADAMTS15	16305	extracellular matrix	GO:0031012	cellular component	5	21	0.111	0.13	0.0719	0.659	0.0524	0.0641	0.191	0.0621	0.272	0.0305	0.17
1347	2449569	ADAMTS15	16305	metalloendopeptidase activity	GO:0004222	molecular function	5	9	0.137	0.153	0.096	0.612	0.0659	0.0704	0.267	0.0699	0.335	0.0314	0.294
1348	2449569	ADAMTS15	16305	extracellular matrix organization	GO:0030198	biological process	5	17	0.179	0.155	0.149	0.547	0.0541	0.102	0.314	0.0696	0.346	0.0682	0.323
1349	1930182	NME3	7851	nucleoside diphosphate kinase activity	GO:0004550	molecular function	53	3	0.0639	0.022	0.0183	0.83	0.00372	0.0632	0.0646	0.0163	0.0297	0.0169	0.0198
1350	1930182	NME3	7851	protein binding	GO:0005515	molecular function	53	831	0.0654	0.022	0.018	0.834	0.0286	0.062	0.069	0.0163	0.0297	0.0102	0.0318
1351	1340055	SEMA4F	10734	positive regulation of cell migration	GO:0030335	biological process	12	37	0.0639	0.133	0.0147	0.857	0.00598	0.0632	0.0646	0.116	0.152	0.0132	0.0164
1352	1340055	SEMA4F	10734	chemorepellent activity	GO:0045499	molecular function	12	5	0.0805	0.134	0.0424	0.734	0.00427	0.0784	0.0827	0.115	0.156	0.0389	0.0461
1353	1340055	SEMA4F	10734	semaphorin receptor binding	GO:0030215	molecular function	12	5	0.0816	0.134	0.0436	0.731	0.00783	0.0762	0.0874	0.115	0.156	0.0374	0.0509
1354	1340055	SEMA4F	10734	negative regulation of axon extension involved in axon guidance	GO:0048843	biological process	12	7	0.085	0.134	0.0458	0.723	0.0249	0.0666	0.108	0.115	0.156	0.0281	0.0745
1355	1340055	SEMA4F	10734	integral component of plasma membrane	GO:0005887	cellular component	12	76	0.0999	0.14	0.0642	0.682	0.0045	0.0954	0.105	0.125	0.156	0.0593	0.0695
1356	1340055	SEMA4F	10734	semaphorin-plexin signaling pathway	GO:0071526	biological process	12	10	0.142	0.173	0.113	0.601	0.0134	0.123	0.164	0.145	0.207	0.0915	0.138
1357	1340055	SEMA4F	10734	neural crest cell migration	GO:0001755	biological process	12	9	0.159	0.19	0.133	0.575	0.00909	0.145	0.175	0.182	0.198	0.116	0.151
1358	1340055	SEMA4F	10734	axon guidance	GO:0007411	biological process	12	36	0.161	0.18	0.131	0.572	0.0438	0.101	0.257	0.13	0.251	0.0686	0.25
1359	1340055	SEMA4F	10734	extracellular space	GO:0005615	cellular component	12	54	0.173	0.196	0.147	0.557	0.0142	0.15	0.199	0.19	0.203	0.121	0.18
1360	1340055	SEMA4F	10734	endoplasmic reticulum	GO:0005783	cellular component	12	62	0.231	0.223	0.214	0.49	0.00925	0.21	0.254	0.202	0.247	0.191	0.239
1361	1340055	SEMA4F	10734	negative chemotaxis	GO:0050919	biological process	12	13	0.236	0.223	0.219	0.485	0.00836	0.216	0.257	0.202	0.247	0.197	0.242
1362	97496	PBX3	8634	DNA-binding transcription factor activity, RNA polymerase II-specific	GO:0000981	molecular function	16	47	0.0639	0.0268	0.0134	0.87	0.0162	0.0632	0.0646	0.0257	0.028	0.00982	0.0182
1363	97496	PBX3	8634	eye development	GO:0001654	biological process	16	10	0.0639	0.0268	0.0141	0.863	0.0132	0.0632	0.0646	0.0257	0.028	0.0111	0.018
1364	97496	PBX3	8634	RNA polymerase II cis-regulatory region sequence-specific DNA binding	GO:0000978	molecular function	16	56	0.0639	0.0268	0.0143	0.862	0.0176	0.0632	0.0646	0.0257	0.028	0.0102	0.02
1365	97496	PBX3	8634	embryonic organ development	GO:0048568	biological process	16	13	0.0639	0.0268	0.0157	0.849	0.0102	0.0632	0.0646	0.0257	0.028	0.0129	0.019
1366	97496	PBX3	8634	brain development	GO:0007420	biological process	16	11	0.0644	0.0268	0.0206	0.816	0.0072	0.0637	0.0651	0.0257	0.028	0.0178	0.024
1367	97496	PBX3	8634	animal organ morphogenesis	GO:0009887	biological process	16	35	0.0656	0.0268	0.0242	0.798	0.00171	0.0649	0.0664	0.0257	0.028	0.0233	0.0252
1368	97496	PBX3	8634	regulation of transcription by RNA polymerase II	GO:0006357	biological process	16	76	0.068	0.0295	0.0255	0.793	0.0179	0.0621	0.0745	0.0245	0.0355	0.0174	0.0374
1369	97496	PBX3	8634	neuron development	GO:0048666	biological process	16	14	0.0689	0.0301	0.0197	0.823	0.0417	0.0608	0.0781	0.0231	0.0392	0.0083	0.0469
1370	2153887	ERI3	17276	3'-5'-exoribonuclease activity	GO:0000175	molecular function	6	6	0.077	0.0496	0.0369	0.749	0.022	0.0624	0.0949	0.0324	0.0759	0.0237	0.0577
1371	2153887	ERI3	17276	RNA binding	GO:0003723	molecular function	6	82	0.0772	0.0496	0.0308	0.771	0.0416	0.0602	0.0991	0.0324	0.0759	0.0133	0.0711
1372	2153887	ERI3	17276	DNA catabolic process, exonucleolytic	GO:0000738	biological process	6	3	0.0831	0.0496	0.0441	0.728	0.024	0.0656	0.105	0.0324	0.0759	0.0276	0.0704
1373	2153887	ERI3	17276	exonucleolytic trimming to generate mature 3'-end of 5.8S rRNA from tricistronic rRNA transcript (SSU-rRNA, 5.8S rRNA, LSU-rRNA)	GO:0000467	biological process	6	3	0.0878	0.0501	0.0495	0.714	0.0222	0.0709	0.109	0.0326	0.0769	0.032	0.0765
1374	1353495	SLC25A4	10990	membrane	GO:0016020	cellular component	23	157	0.0639	0.0412	0.0142	0.862	0.0158	0.0632	0.0646	0.0267	0.0636	0.0105	0.0192
1375	1353495	SLC25A4	10990	mitochondrion	GO:0005739	cellular component	23	93	0.0665	0.0412	0.0202	0.821	0.0229	0.0621	0.0713	0.0267	0.0636	0.0126	0.0323
1376	1353495	SLC25A4	10990	protein binding	GO:0005515	molecular function	23	831	0.0698	0.0412	0.0272	0.785	0.0194	0.0628	0.0776	0.0267	0.0636	0.018	0.0412
1377	1353495	SLC25A4	10990	negative regulation of necroptotic process	GO:0060546	biological process	23	3	0.11	0.0876	0.0685	0.666	0.0492	0.068	0.177	0.0365	0.21	0.0273	0.172
1378	1353495	SLC25A4	10990	ADP transport	GO:0015866	biological process	23	6	0.222	0.202	0.202	0.498	0.026	0.17	0.291	0.145	0.283	0.145	0.283
1379	98483	TAP1	43	ABC-type peptide antigen transporter activity	GO:0015433	molecular function	28	2	0.0639	0.102	0.00982	0.898	0.0242	0.0632	0.0646	0.0617	0.17	0.00559	0.0173
1380	98483	TAP1	43	peptide transmembrane transporter activity	GO:1904680	molecular function	28	11	0.0645	0.102	0.0166	0.843	0.0187	0.0629	0.0661	0.0617	0.17	0.0115	0.0241
1381	98483	TAP1	43	ATPase-coupled transmembrane transporter activity	GO:0042626	molecular function	28	17	0.0686	0.102	0.0218	0.812	0.0352	0.0593	0.0794	0.0617	0.17	0.0107	0.0445
1382	98483	TAP1	43	integral component of membrane	GO:0016021	cellular component	28	33	0.0699	0.103	0.0293	0.777	0.00834	0.0662	0.0738	0.0629	0.17	0.0245	0.0351
1383	98483	TAP1	43	cytosol to endoplasmic reticulum transport	GO:0046967	biological process	28	7	0.0713	0.102	0.0262	0.79	0.0342	0.0617	0.0824	0.0617	0.17	0.0131	0.0527
1384	98483	TAP1	43	ABC-type peptide transporter activity	GO:0015440	molecular function	28	9	0.0715	0.103	0.0294	0.776	0.025	0.0607	0.0843	0.0627	0.17	0.0174	0.0496
1385	98483	TAP1	43	peptide antigen binding	GO:0042605	molecular function	28	3	0.0766	0.102	0.0246	0.796	0.0572	0.0534	0.11	0.0617	0.17	0.00794	0.0761
1386	98483	TAP1	43	peptide transport	GO:0015833	biological process	28	15	0.0811	0.103	0.0394	0.739	0.0378	0.0575	0.114	0.0629	0.17	0.0189	0.0821
1387	98483	TAP1	43	transmembrane transport	GO:0055085	biological process	28	18	0.0963	0.109	0.0591	0.692	0.0218	0.0778	0.119	0.0676	0.175	0.0399	0.0877
1388	98483	TAP1	43	TAP complex	GO:0042825	cellular component	28	3	0.097	0.12	0.0563	0.694	0.0444	0.0638	0.148	0.0729	0.197	0.024	0.132
1389	98483	TAP1	43	MHC class I peptide loading complex	GO:0042824	cellular component	28	4	0.104	0.12	0.066	0.675	0.0343	0.0733	0.146	0.0729	0.197	0.0357	0.122
1390	98483	TAP1	43	TAP1 binding	GO:0046978	molecular function	28	3	0.105	0.111	0.0692	0.671	0.0182	0.0877	0.126	0.0707	0.174	0.0503	0.0951
1391	98483	TAP1	43	TAP2 binding	GO:0046979	molecular function	28	3	0.106	0.111	0.0701	0.67	0.0193	0.0874	0.128	0.0707	0.174	0.05	0.0982
1392	98483	TAP1	43	MHC class Ib protein binding	GO:0023029	molecular function	28	4	0.108	0.118	0.0661	0.668	0.0592	0.0589	0.197	0.0632	0.221	0.0249	0.175
1393	98483	TAP1	43	MHC class I protein binding	GO:0042288	molecular function	28	4	0.111	0.118	0.0711	0.66	0.0549	0.0633	0.195	0.0632	0.221	0.0291	0.174
1394	98483	TAP1	43	ADP binding	GO:0043531	molecular function	28	4	0.111	0.116	0.0761	0.658	0.0235	0.0875	0.142	0.0708	0.19	0.0513	0.113
1395	98483	TAP1	43	antigen processing and presentation of endogenous peptide antigen via MHC class I	GO:0019885	biological process	28	5	0.125	0.124	0.0833	0.634	0.0668	0.0626	0.247	0.0606	0.254	0.0296	0.235
1396	98483	TAP1	43	endoplasmic reticulum	GO:0005783	cellular component	28	62	0.128	0.129	0.0947	0.625	0.0296	0.0943	0.175	0.0766	0.218	0.0588	0.152
1397	98483	TAP1	43	membrane	GO:0016020	cellular component	28	157	0.141	0.141	0.11	0.605	0.0151	0.12	0.164	0.0954	0.208	0.0865	0.14
1398	98483	TAP1	43	integral component of endoplasmic reticulum membrane	GO:0030176	cellular component	28	11	0.145	0.141	0.115	0.597	0.0231	0.114	0.184	0.0939	0.213	0.0798	0.164
1399	98483	TAP1	43	ATP binding	GO:0005524	molecular function	28	17	0.182	0.168	0.156	0.545	0.0346	0.128	0.26	0.108	0.261	0.0974	0.249
1400	98483	TAP1	43	protein binding	GO:0005515	molecular function	28	831	0.196	0.185	0.174	0.528	0.0135	0.17	0.225	0.143	0.238	0.146	0.207
1401	98483	TAP1	43	centriolar satellite	GO:0034451	cellular component	28	8	0.249	0.232	0.228	0.468	0.054	0.147	0.421	0.129	0.417	0.124	0.42
1402	1929076	HTRA1	9476	collagen-containing extracellular matrix	GO:0062023	cellular component	6	28	0.0639	0.0679	0.0136	0.868	0.00533	0.0632	0.0646	0.0617	0.0748	0.0123	0.015
1403	1929076	HTRA1	9476	extracellular exosome	GO:0070062	cellular component	6	162	0.102	0.114	0.0666	0.677	0.0145	0.0879	0.119	0.0988	0.13	0.0517	0.0856
1404	1929076	HTRA1	9476	plasma membrane	GO:0005886	cellular component	6	175	0.114	0.114	0.0801	0.652	0.00614	0.108	0.121	0.0988	0.13	0.0721	0.0889
1405	1929076	HTRA1	9476	identical protein binding	GO:0042802	molecular function	6	79	0.126	0.114	0.0937	0.629	0.0109	0.113	0.141	0.0988	0.13	0.0782	0.112
1406	1929076	HTRA1	9476	protein binding	GO:0005515	molecular function	6	831	0.149	0.12	0.12	0.591	0.0104	0.134	0.165	0.103	0.141	0.103	0.141
1407	1915144	DENND10	31793	late endosome	GO:0005770	cellular component	7	9	0.0664	0.12	0.0243	0.798	0.0109	0.0632	0.0696	0.0817	0.177	0.0193	0.0306
1408	1915144	DENND10	31793	protein transport	GO:0015031	biological process	7	27	0.0891	0.122	0.0508	0.711	0.0212	0.0727	0.109	0.0809	0.185	0.0342	0.0754
1409	1915144	DENND10	31793	endosome transport via multivesicular body sorting pathway	GO:0032509	biological process	7	5	0.0997	0.122	0.0631	0.683	0.0199	0.082	0.121	0.0809	0.185	0.0441	0.0904
1410	1915144	DENND10	31793	small GTPase binding	GO:0031267	molecular function	7	13	0.129	0.131	0.0949	0.624	0.0342	0.0908	0.184	0.084	0.205	0.0543	0.166
1411	1915144	DENND10	31793	regulation of early endosome to late endosome transport	GO:2000641	biological process	7	6	0.147	0.145	0.117	0.595	0.0139	0.128	0.169	0.112	0.188	0.0947	0.145
1412	1915144	DENND10	31793	guanyl-nucleotide exchange factor activity	GO:0005085	molecular function	7	10	0.19	0.166	0.166	0.536	0.0219	0.152	0.237	0.123	0.224	0.123	0.224
1413	1201606	HS3ST1	5194	[heparan sulfate]-glucosamine 3-sulfotransferase 1 activity	GO:0008467	molecular function	5	2	0.0639	0.00889	0.00889	0.914	0.0116	0.0632	0.0646	0.00661	0.012	0.00661	0.012
1414	2140300	MYORG	19918	skeletal muscle fiber development	GO:0048741	biological process	2	3	0.151	0.074	0.074	0.566	0.199	0.0284	0.807	0.00689	0.795	0.00689	0.795
1415	1932535	GLIS2	29450	DNA-binding transcription factor activity, RNA polymerase II-specific	GO:0000981	molecular function	17	47	0.0639	0.0218	0.00927	0.9	0.0246	0.0632	0.0646	0.0187	0.0253	0.00469	0.0183
1416	1932535	GLIS2	29450	sequence-specific double-stranded DNA binding	GO:1990837	molecular function	17	31	0.0639	0.0218	0.0102	0.897	0.0199	0.0632	0.0646	0.0187	0.0253	0.00633	0.0163
1417	1932535	GLIS2	29450	central nervous system development	GO:0007417	biological process	17	9	0.0639	0.0219	0.0152	0.853	0.0066	0.0632	0.0646	0.0189	0.0252	0.0135	0.0171
1418	1932535	GLIS2	29450	positive regulation of transcription by RNA polymerase II	GO:0045944	biological process	17	70	0.0639	0.0219	0.0152	0.853	0.0116	0.0632	0.0646	0.0189	0.0252	0.0124	0.0187
1419	1932535	GLIS2	29450	negative regulation of transcription by RNA polymerase II	GO:0000122	biological process	17	57	0.0639	0.0219	0.0156	0.85	0.0122	0.0632	0.0646	0.0189	0.0252	0.0124	0.0197
1420	1932535	GLIS2	29450	nucleus	GO:0005634	cellular component	17	200	0.0639	0.0219	0.0175	0.836	0.00776	0.0632	0.0646	0.0189	0.0252	0.015	0.0204
1421	1932535	GLIS2	29450	RNA polymerase II cis-regulatory region sequence-specific DNA binding	GO:0000978	molecular function	17	56	0.064	0.0218	0.0109	0.885	0.0307	0.0632	0.0648	0.0187	0.0253	0.00522	0.0226
1422	1932535	GLIS2	29450	regulation of transcription by RNA polymerase II	GO:0006357	biological process	17	76	0.0642	0.0218	0.0134	0.866	0.0299	0.0631	0.0653	0.0187	0.0253	0.00708	0.0254
1423	1932535	GLIS2	29450	nucleoplasm	GO:0005654	cellular component	17	161	0.0643	0.0229	0.0209	0.815	0.00601	0.063	0.0656	0.0216	0.0242	0.0185	0.0236
1424	1932535	GLIS2	29450	protein binding	GO:0005515	molecular function	17	831	0.065	0.0236	0.0234	0.801	0.000736	0.0644	0.0656	0.0234	0.0238	0.023	0.0238
1425	108476	FZD3	4041	Wnt-protein binding	GO:0017147	molecular function	21	6	0.0639	0.0223	0.00313	0.962	0.00559	0.0632	0.0646	0.0172	0.0291	0.00185	0.0053
1426	108476	FZD3	4041	Wnt-activated receptor activity	GO:0042813	molecular function	21	5	0.0639	0.0255	0.00972	0.908	0.00217	0.0632	0.0646	0.023	0.0282	0.00921	0.0103
1427	108476	FZD3	4041	PDZ domain binding	GO:0030165	molecular function	21	8	0.0639	0.0255	0.0103	0.901	0.00738	0.0632	0.0646	0.023	0.0282	0.00862	0.0123
1428	108476	FZD3	4041	canonical Wnt signaling pathway	GO:0060070	biological process	21	27	0.0639	0.0255	0.0118	0.887	0.00276	0.0632	0.0646	0.023	0.0282	0.0111	0.0124
1429	108476	FZD3	4041	integral component of membrane	GO:0016021	cellular component	21	33	0.0639	0.0284	0.0166	0.842	0.0087	0.0632	0.0646	0.0228	0.0353	0.0141	0.0196
1430	108476	FZD3	4041	non-canonical Wnt signaling pathway	GO:0035567	biological process	21	10	0.0648	0.0297	0.0198	0.822	0.0142	0.0626	0.0671	0.0222	0.0397	0.0148	0.0265
1431	108476	FZD3	4041	plasma membrane	GO:0005886	cellular component	21	175	0.0758	0.0474	0.0369	0.751	0.00424	0.0735	0.0782	0.0434	0.0518	0.0337	0.0403
1432	108476	FZD3	4041	protein binding	GO:0005515	molecular function	21	831	0.0979	0.0697	0.0619	0.687	0.00251	0.0963	0.0996	0.0666	0.0729	0.0592	0.0648
1433	108476	FZD3	4041	cytoplasm	GO:0005737	cellular component	21	202	0.133	0.102	0.102	0.617	0.00575	0.124	0.142	0.0927	0.112	0.0927	0.112
1434	2442895	EML6	35412	microtubule binding	GO:0008017	molecular function	2	14	0.0639	0.00549	0.00549	0.94	0.012	0.0632	0.0646	0.00312	0.00966	0.00312	0.00966
1435	98931	EZR	12691	cell adhesion molecule binding	GO:0050839	molecular function	96	6	0.0639	0.0862	0.00365	0.953	0.0134	0.0632	0.0646	0.0669	0.111	0.00157	0.00849
1436	98931	EZR	12691	protein kinase A binding	GO:0051018	molecular function	96	4	0.0639	0.0862	0.00568	0.942	0.00632	0.0632	0.0646	0.0669	0.111	0.00413	0.00781
1437	98931	EZR	12691	protein kinase A catalytic subunit binding	GO:0034236	molecular function	96	4	0.0639	0.0862	0.00617	0.939	0.00475	0.0632	0.0646	0.0669	0.111	0.00476	0.008
1438	98931	EZR	12691	cytoplasmic side of apical plasma membrane	GO:0098592	cellular component	96	3	0.0639	0.0862	0.00877	0.917	0.000684	0.0632	0.0646	0.0669	0.111	0.0086	0.00895
1439	98931	EZR	12691	S100 protein binding	GO:0044548	molecular function	96	3	0.0639	0.0862	0.00922	0.912	0.00478	0.0632	0.0646	0.0669	0.111	0.00818	0.0104
1440	98931	EZR	12691	microvillus	GO:0005902	cellular component	96	8	0.0639	0.0862	0.00932	0.891	0.03	0.0632	0.0646	0.0669	0.111	0.00368	0.0236
1441	98931	EZR	12691	cortical microtubule organization	GO:0043622	biological process	96	3	0.0639	0.0862	0.0145	0.859	0.00203	0.0632	0.0646	0.0669	0.111	0.014	0.0151
1442	98931	EZR	12691	actin filament binding	GO:0051015	molecular function	96	16	0.0639	0.0862	0.0157	0.849	0.0205	0.0632	0.0646	0.0669	0.111	0.0106	0.0233
1443	98931	EZR	12691	positive regulation of cellular protein catabolic process	GO:1903364	biological process	96	8	0.0639	0.0862	0.0174	0.837	0.0126	0.0632	0.0646	0.0669	0.111	0.0137	0.0222
1444	98931	EZR	12691	actin binding	GO:0003779	molecular function	96	9	0.0648	0.0862	0.013	0.867	0.0345	0.0626	0.067	0.0669	0.111	0.00604	0.0282
1445	98931	EZR	12691	phosphatidylinositol-mediated signaling	GO:0048015	biological process	96	6	0.0648	0.0862	0.0161	0.847	0.0282	0.0626	0.0671	0.0669	0.111	0.00909	0.0283
1446	98931	EZR	12691	focal adhesion	GO:0005925	cellular component	96	30	0.0654	0.0879	0.0205	0.817	0.0169	0.0621	0.0689	0.0656	0.118	0.0143	0.0293
1447	98931	EZR	12691	vesicle	GO:0031982	cellular component	96	13	0.0655	0.0892	0.0173	0.839	0.0228	0.0631	0.0679	0.0719	0.111	0.0109	0.0274
1448	98931	EZR	12691	cadherin binding	GO:0045296	molecular function	96	25	0.0655	0.0862	0.0191	0.827	0.0214	0.062	0.0692	0.0669	0.111	0.0124	0.0294
1449	98931	EZR	12691	actin cytoskeleton	GO:0015629	cellular component	96	18	0.0656	0.0862	0.0224	0.807	0.0121	0.0619	0.0695	0.0669	0.111	0.0174	0.029
1450	98931	EZR	12691	plasma membrane raft	GO:0044853	cellular component	96	6	0.0672	0.088	0.0199	0.822	0.0294	0.0605	0.0747	0.0656	0.118	0.0108	0.0366
1451	98931	EZR	12691	positive regulation of early endosome to late endosome transport	GO:2000643	biological process	96	3	0.0675	0.0908	0.0248	0.796	0.0151	0.0622	0.0733	0.0742	0.111	0.0179	0.0342
1452	98931	EZR	12691	protein kinase A regulatory subunit binding	GO:0034237	molecular function	96	4	0.0678	0.088	0.0237	0.801	0.0231	0.0605	0.076	0.0656	0.118	0.0145	0.0387
1453	98931	EZR	12691	microtubule binding	GO:0008017	molecular function	96	14	0.0697	0.088	0.0289	0.778	0.015	0.0631	0.0769	0.0656	0.118	0.021	0.0399
1454	98931	EZR	12691	sphingosine-1-phosphate receptor signaling pathway	GO:0003376	biological process	96	4	0.072	0.0909	0.0297	0.775	0.0273	0.0593	0.0874	0.0636	0.13	0.0168	0.0523
1455	98931	EZR	12691	protein kinase A signaling	GO:0010737	biological process	96	2	0.0726	0.0913	0.0261	0.789	0.0387	0.0562	0.0937	0.0634	0.132	0.0117	0.058
1456	98931	EZR	12691	leukocyte cell-cell adhesion	GO:0007159	biological process	96	5	0.0728	0.0934	0.0329	0.763	0.016	0.0649	0.0817	0.0723	0.121	0.0235	0.0461
1457	98931	EZR	12691	negative regulation of interleukin-2 production	GO:0032703	biological process	96	3	0.0748	0.0916	0.0333	0.76	0.0315	0.057	0.0984	0.0639	0.131	0.0175	0.0633
1458	98931	EZR	12691	immunological synapse	GO:0001772	cellular component	96	3	0.075	0.0941	0.035	0.756	0.0205	0.0643	0.0876	0.0706	0.125	0.0227	0.0539
1459	98931	EZR	12691	astral microtubule organization	GO:0030953	biological process	96	5	0.0764	0.0989	0.0372	0.749	0.0121	0.0685	0.0852	0.0784	0.125	0.029	0.0477
1460	98931	EZR	12691	endosome	GO:0005768	cellular component	96	27	0.0772	0.105	0.0352	0.754	0.0309	0.059	0.101	0.0784	0.14	0.0189	0.0658
1461	98931	EZR	12691	filopodium	GO:0030175	cellular component	96	9	0.0774	0.0957	0.0379	0.747	0.0179	0.0663	0.0903	0.0705	0.13	0.0263	0.0546
1462	98931	EZR	12691	positive regulation of protein secretion	GO:0050714	biological process	96	16	0.0798	0.106	0.04	0.74	0.0233	0.0646	0.0986	0.0793	0.142	0.0251	0.0638
1463	98931	EZR	12691	microvillus assembly	GO:0030033	biological process	96	4	0.0872	0.101	0.0454	0.723	0.0378	0.0635	0.12	0.0706	0.146	0.0213	0.0966
1464	98931	EZR	12691	membrane to membrane docking	GO:0022614	biological process	96	2	0.09	0.115	0.0523	0.708	0.0165	0.0768	0.105	0.0892	0.148	0.0382	0.0716
1465	98931	EZR	12691	actin cytoskeleton reorganization	GO:0031532	biological process	96	3	0.09	0.111	0.053	0.707	0.00881	0.0831	0.0974	0.0931	0.133	0.0449	0.0626
1466	98931	EZR	12691	RNA binding	GO:0003723	molecular function	96	82	0.0921	0.109	0.0544	0.703	0.0214	0.0752	0.113	0.0854	0.14	0.036	0.0821
1467	98931	EZR	12691	negative regulation of T cell receptor signaling pathway	GO:0050860	biological process	96	4	0.102	0.123	0.0627	0.68	0.0426	0.0665	0.157	0.0772	0.197	0.0291	0.135
1468	98931	EZR	12691	ruffle	GO:0001726	cellular component	96	3	0.103	0.125	0.0677	0.675	0.0116	0.0923	0.116	0.104	0.151	0.055	0.0833
1469	98931	EZR	12691	positive regulation of gene expression	GO:0010628	biological process	96	30	0.106	0.121	0.0671	0.671	0.0414	0.0706	0.16	0.0831	0.175	0.0311	0.145
1470	98931	EZR	12691	apical plasma membrane	GO:0016324	cellular component	96	10	0.108	0.124	0.0687	0.666	0.0502	0.0646	0.181	0.0782	0.196	0.0299	0.158
1471	98931	EZR	12691	protein localization to plasma membrane	GO:0072659	biological process	96	14	0.109	0.128	0.0697	0.666	0.0416	0.0719	0.164	0.0793	0.205	0.0325	0.15
1472	98931	EZR	12691	cell periphery	GO:0071944	cellular component	96	7	0.109	0.134	0.0704	0.664	0.0463	0.0667	0.177	0.0933	0.191	0.0326	0.152
1473	98931	EZR	12691	extracellular exosome	GO:0070062	cellular component	96	162	0.113	0.133	0.0787	0.654	0.0101	0.101	0.126	0.129	0.138	0.0663	0.0935
1474	98931	EZR	12691	filopodium assembly	GO:0046847	biological process	96	3	0.114	0.131	0.0765	0.654	0.0364	0.078	0.165	0.0932	0.184	0.0409	0.143
1475	98931	EZR	12691	ATPase binding	GO:0051117	molecular function	96	11	0.119	0.137	0.0844	0.644	0.0201	0.0967	0.146	0.11	0.171	0.0605	0.118
1476	98931	EZR	12691	regulation of organelle assembly	GO:1902115	biological process	96	20	0.119	0.143	0.0852	0.641	0.0244	0.0919	0.155	0.112	0.181	0.0573	0.127
1477	98931	EZR	12691	perinuclear region of cytoplasm	GO:0048471	cellular component	96	35	0.128	0.147	0.0948	0.626	0.0277	0.0948	0.172	0.12	0.181	0.06	0.15
1478	98931	EZR	12691	identical protein binding	GO:0042802	molecular function	96	79	0.132	0.15	0.101	0.618	0.0102	0.119	0.146	0.138	0.162	0.0852	0.119
1479	98931	EZR	12691	actin filament bundle assembly	GO:0051017	biological process	96	10	0.133	0.151	0.102	0.617	0.00888	0.12	0.148	0.131	0.175	0.0884	0.118
1480	98931	EZR	12691	membrane	GO:0016020	cellular component	96	157	0.134	0.15	0.103	0.616	0.00242	0.132	0.136	0.134	0.169	0.0989	0.107
1481	98931	EZR	12691	plasma membrane	GO:0005886	cellular component	96	175	0.134	0.153	0.103	0.615	0.00456	0.128	0.141	0.133	0.175	0.0959	0.111
1482	98931	EZR	12691	negative regulation of ERK1 and ERK2 cascade	GO:0070373	biological process	96	6	0.136	0.155	0.105	0.611	0.0169	0.114	0.163	0.128	0.189	0.081	0.137
1483	98931	EZR	12691	extracellular space	GO:0005615	cellular component	96	54	0.138	0.153	0.108	0.609	0.00908	0.126	0.151	0.146	0.162	0.0931	0.124
1484	98931	EZR	12691	positive regulation of protein localization to early endosome	GO:1902966	biological process	96	3	0.143	0.159	0.111	0.601	0.0296	0.106	0.194	0.123	0.205	0.0717	0.173
1485	98931	EZR	12691	regulation of cell shape	GO:0008360	biological process	96	23	0.145	0.158	0.115	0.597	0.0198	0.117	0.179	0.13	0.194	0.0855	0.154
1486	98931	EZR	12691	cellular protein-containing complex localization	GO:0034629	biological process	96	17	0.145	0.158	0.11	0.597	0.0492	0.0871	0.243	0.101	0.247	0.0501	0.243
1487	98931	EZR	12691	actin filament	GO:0005884	cellular component	96	6	0.149	0.164	0.12	0.591	0.0198	0.121	0.183	0.13	0.206	0.0882	0.163
1488	98931	EZR	12691	negative regulation of p38MAPK cascade	GO:1903753	biological process	96	3	0.152	0.165	0.123	0.587	0.0202	0.123	0.188	0.132	0.205	0.0905	0.166
1489	98931	EZR	12691	protein localization to cell cortex	GO:0072697	biological process	96	11	0.155	0.164	0.123	0.582	0.0426	0.0996	0.241	0.113	0.239	0.0632	0.239
1490	98931	EZR	12691	establishment of centrosome localization	GO:0051660	biological process	96	4	0.167	0.172	0.14	0.565	0.0201	0.135	0.206	0.134	0.222	0.105	0.188
1491	98931	EZR	12691	protein binding	GO:0005515	molecular function	96	831	0.183	0.19	0.159	0.544	0.00187	0.179	0.186	0.181	0.2	0.155	0.163
1492	98931	EZR	12691	apical part of cell	GO:0045177	cellular component	96	3	0.185	0.192	0.161	0.542	0.018	0.153	0.223	0.165	0.223	0.126	0.205
1493	98931	EZR	12691	protein domain specific binding	GO:0019904	molecular function	96	86	0.199	0.204	0.178	0.524	0.00885	0.181	0.219	0.196	0.213	0.158	0.201
1494	98931	EZR	12691	cytosol	GO:0005829	cellular component	96	164	0.202	0.204	0.181	0.521	0.00416	0.193	0.211	0.202	0.207	0.171	0.191
1495	98931	EZR	12691	establishment of endothelial barrier	GO:0061028	biological process	96	5	0.209	0.22	0.178	0.509	0.0728	0.102	0.427	0.117	0.416	0.0743	0.428
1496	98931	EZR	12691	cytoplasm	GO:0005737	cellular component	96	202	0.215	0.213	0.195	0.507	0.0074	0.198	0.232	0.202	0.224	0.177	0.215
1497	98931	EZR	12691	cell projection	GO:0042995	cellular component	96	13	0.215	0.213	0.194	0.506	0.0276	0.162	0.287	0.162	0.28	0.137	0.275
1498	98931	EZR	12691	extrinsic component of membrane	GO:0019898	cellular component	96	10	0.223	0.219	0.205	0.498	0.00251	0.217	0.23	0.211	0.227	0.199	0.211
1499	98931	EZR	12691	fibrillar center	GO:0001650	cellular component	96	7	0.244	0.236	0.228	0.478	0.00691	0.227	0.261	0.215	0.259	0.21	0.247
1500	98931	EZR	12691	negative regulation of transcription by RNA polymerase II	GO:0000122	biological process	96	57	0.245	0.241	0.228	0.476	0.0245	0.192	0.313	0.19	0.305	0.171	0.303
1501	98931	EZR	12691	protein-containing complex	GO:0032991	cellular component	96	373	0.249	0.247	0.229	0.47	0.0442	0.16	0.388	0.16	0.381	0.136	0.387
1502	98931	EZR	12691	cellular response to cAMP	GO:0071320	biological process	96	9	0.319	0.313	0.308	0.412	0.0187	0.268	0.379	0.262	0.374	0.254	0.373
1503	96274	HTR1B	5287	adenylate cyclase-inhibiting serotonin receptor signaling pathway	GO:0007198	biological process	18	3	0.0639	0.0212	0.00595	0.942	0.00188	0.0632	0.0646	0.0207	0.0218	0.00538	0.00659
1504	96274	HTR1B	5287	neurotransmitter receptor activity	GO:0030594	molecular function	18	15	0.0639	0.0212	0.0061	0.94	0.00435	0.0632	0.0646	0.0207	0.0218	0.00483	0.00772
1505	96274	HTR1B	5287	G protein-coupled receptor signaling pathway, coupled to cyclic nucleotide second messenger	GO:0007187	biological process	18	8	0.0639	0.0212	0.00628	0.937	0.00743	0.0632	0.0646	0.0207	0.0218	0.00462	0.00854
1506	96274	HTR1B	5287	chemical synaptic transmission	GO:0007268	biological process	18	23	0.0639	0.0212	0.00885	0.916	0.00475	0.0632	0.0646	0.0207	0.0218	0.00776	0.0101
1507	96274	HTR1B	5287	G protein-coupled serotonin receptor activity	GO:0004993	molecular function	18	10	0.0639	0.0212	0.00944	0.909	0.00779	0.0632	0.0646	0.0207	0.0218	0.00767	0.0116
1508	96274	HTR1B	5287	adenylate cyclase-inhibiting G protein-coupled receptor signaling pathway	GO:0007193	biological process	18	10	0.0639	0.0214	0.0108	0.895	0.00772	0.0632	0.0646	0.0206	0.0224	0.00928	0.0127
1509	96274	HTR1B	5287	cellular response to alkaloid	GO:0071312	biological process	18	9	0.0639	0.0214	0.0121	0.882	0.0108	0.0632	0.0646	0.0206	0.0224	0.00974	0.015
1510	96274	HTR1B	5287	cellular response to drug	GO:0035690	biological process	18	6	0.0639	0.0222	0.0132	0.872	0.00724	0.0632	0.0646	0.0213	0.0232	0.0115	0.015
1511	96274	HTR1B	5287	integral component of plasma membrane	GO:0005887	cellular component	18	76	0.0639	0.0222	0.0164	0.843	0.00739	0.0632	0.0646	0.0213	0.0232	0.0143	0.0188
1512	96274	HTR1B	5287	positive regulation of vascular associated smooth muscle cell proliferation	GO:1904707	biological process	18	5	0.0639	0.0224	0.0173	0.836	0.00227	0.0632	0.0646	0.0213	0.0235	0.0164	0.0181
1513	96274	HTR1B	5287	serotonin binding	GO:0051378	molecular function	18	7	0.0639	0.0225	0.0176	0.835	0.00632	0.0632	0.0646	0.0214	0.0237	0.0155	0.02
1514	96274	HTR1B	5287	dendrite	GO:0030425	cellular component	18	24	0.0647	0.0243	0.0202	0.819	0.0103	0.0627	0.0669	0.02	0.0295	0.0163	0.0251
1515	96274	HTR1B	5287	plasma membrane	GO:0005886	cellular component	18	175	0.083	0.0484	0.045	0.727	0.0085	0.0772	0.0893	0.041	0.0573	0.038	0.0532
1516	96274	HTR1B	5287	protein binding	GO:0005515	molecular function	18	831	0.128	0.0952	0.0952	0.627	0.0106	0.115	0.142	0.08	0.113	0.08	0.113
1517	109292	RAD50	9816	double-strand break repair	GO:0006302	biological process	53	8	0.0639	0.038	0.00493	0.944	0.0125	0.0632	0.0646	0.0284	0.051	0.00266	0.00916
1518	109292	RAD50	9816	site of double-strand break	GO:0035861	cellular component	53	8	0.0639	0.038	0.00631	0.938	0.00496	0.0632	0.0646	0.0284	0.051	0.00485	0.00821
1519	109292	RAD50	9816	G-quadruplex DNA binding	GO:0051880	molecular function	53	3	0.0639	0.038	0.00897	0.908	0.0158	0.0632	0.0646	0.0284	0.051	0.00548	0.0147
1520	109292	RAD50	9816	3'-5' exonuclease activity	GO:0008408	molecular function	53	6	0.0639	0.038	0.0104	0.894	0.0252	0.0632	0.0646	0.0284	0.051	0.00603	0.0179
1521	109292	RAD50	9816	telomeric 3' overhang formation	GO:0031860	biological process	53	2	0.0639	0.038	0.013	0.872	0.0149	0.0632	0.0646	0.0284	0.051	0.0097	0.0175
1522	109292	RAD50	9816	telomere maintenance via recombination	GO:0000722	biological process	53	4	0.0639	0.038	0.014	0.864	0.00421	0.0632	0.0646	0.0284	0.051	0.0129	0.0152
1523	109292	RAD50	9816	DNA repair	GO:0006281	biological process	53	23	0.0639	0.038	0.0148	0.857	0.00522	0.0632	0.0646	0.0284	0.051	0.0135	0.0162
1524	109292	RAD50	9816	single-stranded telomeric DNA binding	GO:0043047	molecular function	53	5	0.0639	0.038	0.0157	0.849	0.00857	0.0632	0.0646	0.0284	0.051	0.0134	0.0185
1525	109292	RAD50	9816	DNA duplex unwinding	GO:0032508	biological process	53	4	0.064	0.038	0.0129	0.873	0.0261	0.0631	0.0649	0.0284	0.051	0.00763	0.022
1526	109292	RAD50	9816	Mre11 complex	GO:0030870	cellular component	53	2	0.0647	0.038	0.0137	0.866	0.0309	0.0627	0.0667	0.0284	0.051	0.0073	0.0257
1527	109292	RAD50	9816	condensed nuclear chromosome	GO:0000794	cellular component	53	3	0.0647	0.038	0.0101	0.886	0.0396	0.0626	0.0669	0.0284	0.051	0.00366	0.0278
1528	109292	RAD50	9816	DNA binding	GO:0003677	molecular function	53	31	0.0655	0.0382	0.0213	0.814	0.0167	0.0632	0.0678	0.0286	0.051	0.0152	0.0299
1529	109292	RAD50	9816	chromosome, telomeric region	GO:0000781	cellular component	53	9	0.0659	0.039	0.0154	0.855	0.0356	0.0616	0.0705	0.0277	0.0549	0.00753	0.0314
1530	109292	RAD50	9816	double-stranded telomeric DNA binding	GO:0003691	molecular function	53	3	0.0672	0.039	0.0228	0.805	0.022	0.0604	0.0748	0.0277	0.0549	0.0142	0.0366
1531	109292	RAD50	9816	telomere maintenance via telomerase	GO:0007004	biological process	53	3	0.0674	0.039	0.0238	0.8	0.0198	0.0611	0.0743	0.0277	0.0549	0.0155	0.0364
1532	109292	RAD50	9816	nucleic acid phosphodiester bond hydrolysis	GO:0090305	biological process	53	10	0.0676	0.0395	0.026	0.79	0.0141	0.0617	0.074	0.0284	0.0551	0.0192	0.0353
1533	109292	RAD50	9816	single-stranded DNA endodeoxyribonuclease activity	GO:0000014	molecular function	53	4	0.0685	0.0396	0.0224	0.808	0.0319	0.0594	0.0789	0.0273	0.0576	0.0117	0.0432
1534	109292	RAD50	9816	DNA helicase activity	GO:0003678	molecular function	53	10	0.0685	0.0396	0.0261	0.79	0.021	0.0602	0.0779	0.0273	0.0576	0.0167	0.0407
1535	109292	RAD50	9816	positive regulation of telomere maintenance	GO:0032206	biological process	53	12	0.0689	0.0429	0.0268	0.787	0.0148	0.0627	0.0757	0.0323	0.0571	0.0195	0.0369
1536	109292	RAD50	9816	positive regulation of protein autophosphorylation	GO:0031954	biological process	53	4	0.0702	0.0439	0.027	0.786	0.0228	0.0607	0.081	0.0324	0.0595	0.0167	0.0436
1537	109292	RAD50	9816	cellular response to DNA damage stimulus	GO:0006974	biological process	53	21	0.0716	0.0465	0.031	0.77	0.0171	0.0618	0.083	0.0369	0.0586	0.0217	0.0444
1538	109292	RAD50	9816	DNA recombination	GO:0006310	biological process	53	13	0.0722	0.0411	0.0287	0.778	0.032	0.057	0.0913	0.0263	0.0644	0.0148	0.0555
1539	109292	RAD50	9816	regulation of mitotic recombination	GO:0000019	biological process	53	6	0.0725	0.0427	0.0318	0.767	0.021	0.0616	0.0854	0.0293	0.0622	0.0205	0.0493
1540	109292	RAD50	9816	negative regulation of telomere capping	GO:1904354	biological process	53	4	0.0753	0.0459	0.0345	0.758	0.0216	0.0649	0.0874	0.0316	0.0668	0.0219	0.0544
1541	109292	RAD50	9816	chromosome organization involved in meiotic cell cycle	GO:0070192	biological process	53	17	0.078	0.0476	0.0385	0.745	0.021	0.0646	0.0942	0.0346	0.0654	0.0252	0.0588
1542	109292	RAD50	9816	positive regulation of kinase activity	GO:0033674	biological process	53	17	0.0971	0.0687	0.0602	0.689	0.0193	0.0794	0.119	0.0497	0.095	0.0426	0.0852
1543	109292	RAD50	9816	identical protein binding	GO:0042802	molecular function	53	79	0.129	0.105	0.0962	0.625	0.0102	0.116	0.142	0.091	0.122	0.0814	0.114
1544	109292	RAD50	9816	protein binding	GO:0005515	molecular function	53	831	0.141	0.116	0.11	0.605	0.0184	0.116	0.17	0.09	0.15	0.083	0.145
1545	109292	RAD50	9816	membrane	GO:0016020	cellular component	53	157	0.162	0.139	0.136	0.571	0.00802	0.15	0.177	0.127	0.153	0.122	0.153
1546	109292	RAD50	9816	protein-macromolecule adaptor activity	GO:0030674	molecular function	53	16	0.185	0.165	0.118	0.546	0.128	0.0578	0.594	0.0454	0.599	0.0178	0.785
1547	1914862	METTL9	24586	protein binding	GO:0005515	molecular function	2	831	0.0987	0.0626	0.0626	0.686	0.00862	0.0911	0.107	0.0535	0.0732	0.0535	0.0732
1548	2442218	N4BP3	29852	cytoplasmic vesicle	GO:0031410	cellular component	4	47	0.0766	0.0742	0.0375	0.749	0.00778	0.0711	0.0825	0.0649	0.0849	0.0321	0.0439
1549	2442218	N4BP3	29852	protein binding	GO:0005515	molecular function	4	831	0.121	0.0884	0.0884	0.638	0.00734	0.113	0.13	0.0781	0.1	0.0781	0.1
1550	1933113	GPR146	21718	plasma membrane	GO:0005886	cellular component	1	175	0.154	0.126	0.126	0.584	0.0108	0.137	0.172	0.107	0.147	0.107	0.147
1551	1933198	IGFBPL1	20081	regulation of signal transduction	GO:0009966	biological process	3	78	0.124	0.162	0.0916	0.633	0.00367	0.121	0.128	0.131	0.202	0.0862	0.0974
1552	1933198	IGFBPL1	20081	cellular response to tumor cell	GO:0071228	biological process	3	4	0.136	0.162	0.105	0.612	0.0166	0.114	0.162	0.131	0.202	0.081	0.136
1553	1933198	IGFBPL1	20081	extracellular space	GO:0005615	cellular component	3	54	0.23	0.212	0.212	0.491	0.0156	0.196	0.27	0.175	0.257	0.175	0.257
1554	1921461	C15orf39	24497	cytosol	GO:0005829	cellular component	3	164	0.11	0.0758	0.0758	0.659	0.00534	0.104	0.117	0.0692	0.083	0.0692	0.083
1555	1917587	IYD	21071	cytoplasmic vesicle membrane	GO:0030659	cellular component	10	15	0.114	0.402	0.0787	0.653	0.0211	0.0916	0.141	0.319	0.507	0.0554	0.112
1556	1917587	IYD	21071	FMN binding	GO:0010181	molecular function	10	4	0.161	0.402	0.134	0.573	0.0126	0.141	0.184	0.319	0.507	0.111	0.161
1557	1917587	IYD	21071	oxidoreductase activity	GO:0016491	molecular function	10	90	0.171	0.402	0.146	0.56	0.00495	0.163	0.18	0.319	0.507	0.136	0.156
1558	1917587	IYD	21071	integral component of plasma membrane	GO:0005887	cellular component	10	76	0.202	0.408	0.18	0.522	0.0142	0.174	0.234	0.315	0.53	0.15	0.217
1559	1917587	IYD	21071	tyrosine metabolic process	GO:0006570	biological process	10	10	0.25	0.408	0.231	0.468	0.0472	0.157	0.401	0.315	0.53	0.133	0.401
1560	1917587	IYD	21071	plasma membrane	GO:0005886	cellular component	10	175	0.313	0.433	0.302	0.416	0.0215	0.256	0.382	0.36	0.521	0.242	0.376
1561	1917587	IYD	21071	protein binding	GO:0005515	molecular function	10	831	0.363	0.433	0.356	0.377	0.0199	0.305	0.433	0.36	0.521	0.295	0.429
1562	1917587	IYD	21071	thyroid hormone metabolic process	GO:0042403	biological process	10	6	0.376	0.433	0.369	0.368	0.0132	0.334	0.423	0.36	0.521	0.325	0.419
1563	1917587	IYD	21071	nucleoplasm	GO:0005654	cellular component	10	161	0.415	0.433	0.41	0.341	0.016	0.363	0.475	0.36	0.521	0.356	0.472
1564	1917587	IYD	21071	iodide peroxidase activity	GO:0004447	molecular function	10	2	0.451	0.448	0.446	0.315	0.0312	0.352	0.577	0.349	0.575	0.346	0.575
1565	108481	ANXA11	535	S100 protein binding	GO:0044548	molecular function	23	3	0.0739	0.331	0.0338	0.76	0.0138	0.0657	0.083	0.26	0.42	0.0254	0.0451
1566	108481	ANXA11	535	phagocytosis	GO:0006909	biological process	23	3	0.0853	0.331	0.047	0.722	0.0147	0.0746	0.0976	0.26	0.42	0.0351	0.0631
1567	108481	ANXA11	535	calcium-dependent protein binding	GO:0048306	molecular function	23	7	0.0978	0.331	0.0616	0.688	0.00485	0.0941	0.102	0.26	0.42	0.0565	0.0672
1568	108481	ANXA11	535	MHC class II protein complex binding	GO:0023026	molecular function	23	3	0.15	0.331	0.121	0.59	0.0106	0.134	0.167	0.26	0.42	0.104	0.142
1569	108481	ANXA11	535	collagen-containing extracellular matrix	GO:0062023	cellular component	23	28	0.167	0.331	0.138	0.565	0.0353	0.115	0.241	0.26	0.42	0.0812	0.233
1570	108481	ANXA11	535	extracellular exosome	GO:0070062	cellular component	23	162	0.167	0.331	0.141	0.565	0.0128	0.146	0.192	0.26	0.42	0.118	0.169
1571	108481	ANXA11	535	spindle	GO:0005819	cellular component	23	5	0.167	0.331	0.14	0.565	0.0234	0.131	0.213	0.26	0.42	0.0991	0.197
1572	108481	ANXA11	535	membrane	GO:0016020	cellular component	23	157	0.188	0.331	0.165	0.537	0.0136	0.162	0.218	0.26	0.42	0.137	0.199
1573	108481	ANXA11	535	calcium ion binding	GO:0005509	molecular function	23	19	0.203	0.331	0.182	0.52	0.0136	0.175	0.234	0.26	0.42	0.152	0.216
1574	108481	ANXA11	535	RNA binding	GO:0003723	molecular function	23	82	0.214	0.331	0.195	0.507	0.0142	0.185	0.247	0.26	0.42	0.163	0.233
1575	108481	ANXA11	535	phagocytic vesicle	GO:0045335	cellular component	23	8	0.217	0.332	0.198	0.504	0.00701	0.203	0.233	0.26	0.422	0.182	0.217
1576	108481	ANXA11	535	cytokinetic process	GO:0032506	biological process	23	15	0.259	0.333	0.243	0.463	0.0255	0.2	0.335	0.261	0.427	0.18	0.328
1577	108481	ANXA11	535	azurophil granule	GO:0042582	cellular component	23	4	0.26	0.333	0.244	0.461	0.0311	0.19	0.358	0.261	0.427	0.168	0.354
1578	108481	ANXA11	535	cytosol	GO:0005829	cellular component	23	164	0.275	0.333	0.26	0.448	0.0251	0.213	0.354	0.261	0.427	0.195	0.348
1579	108481	ANXA11	535	specific granule	GO:0042581	cellular component	23	2	0.279	0.335	0.264	0.443	0.0339	0.198	0.392	0.261	0.429	0.178	0.391
1580	108481	ANXA11	535	protein binding	GO:0005515	molecular function	23	831	0.281	0.333	0.266	0.442	0.0323	0.203	0.388	0.261	0.427	0.182	0.387
1581	108481	ANXA11	535	cytoplasm	GO:0005737	cellular component	23	202	0.293	0.333	0.28	0.432	0.0279	0.222	0.386	0.261	0.427	0.205	0.383
1582	108481	ANXA11	535	nucleoplasm	GO:0005654	cellular component	23	161	0.325	0.34	0.314	0.406	0.026	0.253	0.417	0.261	0.444	0.239	0.414
1583	108481	ANXA11	535	midbody	GO:0030496	cellular component	23	7	0.328	0.346	0.317	0.403	0.028	0.252	0.426	0.258	0.465	0.239	0.422
1584	108481	ANXA11	535	response to calcium ion	GO:0051592	biological process	23	5	0.35	0.38	0.339	0.381	0.0553	0.217	0.565	0.244	0.591	0.204	0.563
1585	108481	ANXA11	535	nuclear envelope	GO:0005635	cellular component	23	8	0.356	0.371	0.348	0.383	0.0148	0.312	0.405	0.334	0.412	0.301	0.401
1586	97173	MT3	7408	negative regulation of necrotic cell death	GO:0060547	biological process	48	4	0.0639	0.134	0.0122	0.882	0.00264	0.0632	0.0646	0.0812	0.22	0.0117	0.0128
1587	97173	MT3	7408	positive regulation of necrotic cell death	GO:0010940	biological process	48	4	0.0639	0.134	0.0131	0.872	0.0139	0.0632	0.0646	0.0812	0.22	0.00997	0.0171
1588	97173	MT3	7408	protein kinase B signaling	GO:0043491	biological process	48	2	0.0639	0.134	0.0151	0.854	0.0107	0.0632	0.0646	0.0812	0.22	0.0125	0.0183
1589	97173	MT3	7408	removal of superoxide radicals	GO:0019430	biological process	48	3	0.0639	0.134	0.0167	0.842	0.0164	0.0632	0.0646	0.0812	0.22	0.0123	0.0227
1590	97173	MT3	7408	ERK1 and ERK2 cascade	GO:0070371	biological process	48	3	0.0673	0.134	0.026	0.79	0.00787	0.0651	0.0695	0.0812	0.22	0.022	0.0307
1591	97173	MT3	7408	negative regulation of cysteine-type endopeptidase activity involved in apoptotic process	GO:0043154	biological process	48	8	0.0695	0.134	0.0258	0.791	0.0213	0.0634	0.0762	0.0812	0.22	0.0164	0.0407
1592	97173	MT3	7408	activation of protein kinase B activity	GO:0032148	biological process	48	3	0.0725	0.134	0.0323	0.765	0.0129	0.0651	0.0807	0.0812	0.22	0.0247	0.0423
1593	97173	MT3	7408	metal ion binding	GO:0046872	molecular function	48	9	0.0746	0.135	0.028	0.783	0.0392	0.0611	0.091	0.081	0.224	0.0126	0.0622
1594	97173	MT3	7408	cellular response to hypoxia	GO:0071456	biological process	48	11	0.0805	0.139	0.0402	0.739	0.0245	0.0647	0.1	0.0823	0.234	0.0245	0.066
1595	97173	MT3	7408	positive regulation of protein phosphorylation	GO:0001934	biological process	48	23	0.0823	0.139	0.0438	0.73	0.0115	0.0734	0.0922	0.0823	0.234	0.0348	0.055
1596	97173	MT3	7408	protein kinase activator activity	GO:0030295	molecular function	48	9	0.083	0.136	0.0411	0.734	0.0396	0.0566	0.122	0.0807	0.228	0.0192	0.0877
1597	97173	MT3	7408	cellular zinc ion homeostasis	GO:0006882	biological process	48	7	0.0861	0.14	0.0477	0.719	0.0195	0.0709	0.105	0.0821	0.239	0.0323	0.0704
1598	97173	MT3	7408	inclusion body	GO:0016234	cellular component	48	18	0.0873	0.141	0.0461	0.721	0.0345	0.0633	0.12	0.082	0.242	0.0236	0.0902
1599	97173	MT3	7408	cellular response to cadmium ion	GO:0071276	biological process	48	5	0.0918	0.14	0.0545	0.703	0.0171	0.0769	0.11	0.0821	0.239	0.0392	0.0757
1600	97173	MT3	7408	cadmium ion homeostasis	GO:0055073	biological process	48	4	0.092	0.141	0.0544	0.703	0.0202	0.0751	0.113	0.082	0.242	0.037	0.0801
1601	97173	MT3	7408	positive regulation of gene expression	GO:0010628	biological process	48	30	0.093	0.144	0.0491	0.71	0.0515	0.0582	0.149	0.0826	0.251	0.0187	0.129
1602	97173	MT3	7408	zinc ion homeostasis	GO:0055069	biological process	48	5	0.0933	0.148	0.0565	0.698	0.0161	0.0789	0.11	0.0914	0.238	0.0421	0.0757
1603	97173	MT3	7408	negative regulation of axon extension	GO:0030517	biological process	48	7	0.0942	0.141	0.0562	0.698	0.0232	0.0741	0.12	0.082	0.242	0.0365	0.0866
1604	97173	MT3	7408	cellular response to oxidative stress	GO:0034599	biological process	48	9	0.103	0.141	0.0639	0.677	0.0433	0.0661	0.161	0.082	0.242	0.0294	0.139
1605	97173	MT3	7408	positive regulation of cell death	GO:0010942	biological process	48	8	0.109	0.146	0.0602	0.68	0.063	0.0642	0.183	0.0826	0.257	0.0181	0.2
1606	97173	MT3	7408	positive regulation of transcription from RNA polymerase II promoter in response to oxidative stress	GO:0036091	biological process	48	6	0.114	0.151	0.0794	0.652	0.0224	0.0898	0.146	0.0914	0.249	0.0537	0.117
1607	97173	MT3	7408	negative regulation of apoptotic process	GO:0043066	biological process	48	33	0.118	0.149	0.0787	0.647	0.0494	0.071	0.194	0.0827	0.269	0.0326	0.19
1608	97173	MT3	7408	cellular response to zinc ion	GO:0071294	biological process	48	4	0.119	0.151	0.0839	0.643	0.0274	0.0882	0.159	0.0914	0.249	0.0522	0.135
1609	97173	MT3	7408	positive regulation of ERK1 and ERK2 cascade	GO:0070374	biological process	48	15	0.122	0.154	0.0875	0.636	0.033	0.0863	0.173	0.0915	0.261	0.0506	0.152
1610	97173	MT3	7408	detoxification of copper ion	GO:0010273	biological process	48	4	0.125	0.158	0.0902	0.631	0.0369	0.0843	0.185	0.0906	0.276	0.0501	0.162
1611	97173	MT3	7408	cellular response to copper ion	GO:0071280	biological process	48	4	0.127	0.152	0.0941	0.627	0.0265	0.0953	0.169	0.0918	0.25	0.0604	0.147
1612	97173	MT3	7408	negative regulation of reactive oxygen species metabolic process	GO:2000378	biological process	48	9	0.146	0.168	0.114	0.594	0.043	0.0924	0.232	0.0906	0.313	0.0584	0.223
1613	97173	MT3	7408	cellular response to nitric oxide	GO:0071732	biological process	48	5	0.148	0.173	0.115	0.592	0.0425	0.0938	0.232	0.101	0.296	0.0617	0.216
1614	97173	MT3	7408	positive regulation of vascular endothelial growth factor receptor signaling pathway	GO:0030949	biological process	48	3	0.148	0.169	0.117	0.592	0.0335	0.104	0.211	0.11	0.26	0.0711	0.193
1615	97173	MT3	7408	positive regulation of transcription, DNA-templated	GO:0045893	biological process	48	49	0.149	0.18	0.12	0.592	0.00703	0.138	0.16	0.154	0.212	0.108	0.133
1616	97173	MT3	7408	negative regulation of cell growth	GO:0030308	biological process	48	20	0.155	0.189	0.127	0.581	0.0264	0.118	0.205	0.132	0.27	0.0868	0.185
1617	97173	MT3	7408	histone modification	GO:0016570	biological process	48	15	0.159	0.183	0.131	0.576	0.0233	0.124	0.204	0.123	0.272	0.0921	0.186
1618	97173	MT3	7408	negative regulation of cysteine-type endopeptidase activity	GO:2000117	biological process	48	5	0.159	0.174	0.123	0.575	0.0622	0.0825	0.307	0.0905	0.333	0.0459	0.331
1619	97173	MT3	7408	response to hypoxia	GO:0001666	biological process	48	15	0.168	0.189	0.142	0.564	0.0201	0.137	0.206	0.153	0.234	0.107	0.187
1620	97173	MT3	7408	cysteine-type endopeptidase inhibitor activity involved in apoptotic process	GO:0043027	molecular function	48	3	0.183	0.199	0.158	0.543	0.0322	0.13	0.257	0.135	0.293	0.102	0.245
1621	97173	MT3	7408	cadmium ion binding	GO:0046870	molecular function	48	3	0.185	0.194	0.156	0.54	0.0545	0.105	0.326	0.107	0.352	0.0739	0.327
1622	97173	MT3	7408	negative regulation of oxidoreductase activity	GO:0051354	biological process	48	18	0.193	0.211	0.129	0.531	0.128	0.0588	0.634	0.0739	0.605	0.0201	0.826
1623	97173	MT3	7408	protein stabilization	GO:0050821	biological process	48	11	0.205	0.214	0.183	0.518	0.0202	0.166	0.252	0.162	0.282	0.141	0.238
1624	97173	MT3	7408	copper ion binding	GO:0005507	molecular function	48	7	0.229	0.23	0.205	0.489	0.0566	0.13	0.402	0.129	0.41	0.104	0.403
1625	97173	MT3	7408	nucleus	GO:0005634	cellular component	48	200	0.231	0.244	0.213	0.49	0.00989	0.209	0.256	0.229	0.261	0.189	0.241
1626	97173	MT3	7408	cytoplasm	GO:0005737	cellular component	48	202	0.243	0.252	0.227	0.478	0.00624	0.229	0.258	0.233	0.274	0.211	0.245
1627	97173	MT3	7408	perinuclear region of cytoplasm	GO:0048471	cellular component	48	35	0.255	0.257	0.239	0.465	0.0242	0.199	0.328	0.196	0.337	0.178	0.321
1628	97173	MT3	7408	zinc ion binding	GO:0008270	molecular function	48	15	0.276	0.275	0.262	0.448	0.0154	0.236	0.321	0.232	0.325	0.219	0.313
1629	97173	MT3	7408	protein binding	GO:0005515	molecular function	48	831	0.316	0.318	0.305	0.414	0.0157	0.272	0.366	0.288	0.35	0.259	0.36
1630	1343139	IKZF4	13179	DNA-binding transcription factor activity	GO:0003700	molecular function	12	23	0.0745	0.0942	0.0338	0.76	0.0216	0.0614	0.0904	0.0645	0.138	0.0217	0.0528
1631	1343139	IKZF4	13179	protein homooligomerization	GO:0051260	biological process	12	7	0.0801	0.0942	0.0415	0.737	0.0134	0.0712	0.0902	0.0645	0.138	0.0318	0.0541
1632	1343139	IKZF4	13179	RNA polymerase II cis-regulatory region sequence-specific DNA binding	GO:0000978	molecular function	12	56	0.0809	0.0942	0.0401	0.739	0.0253	0.0652	0.1	0.0645	0.138	0.0238	0.0676
1633	1343139	IKZF4	13179	regulation of transcription by RNA polymerase II	GO:0006357	biological process	12	76	0.0832	0.0942	0.0438	0.729	0.0251	0.065	0.106	0.0645	0.138	0.0269	0.0714
1634	1343139	IKZF4	13179	nucleoplasm	GO:0005654	cellular component	12	161	0.103	0.0942	0.0671	0.676	0.017	0.0856	0.123	0.0645	0.138	0.0498	0.0903
1635	1343139	IKZF4	13179	protein binding	GO:0005515	molecular function	12	831	0.107	0.0942	0.0722	0.665	0.0192	0.0873	0.132	0.0645	0.138	0.0517	0.101
1636	1343139	IKZF4	13179	nuclear body	GO:0016604	cellular component	12	27	0.108	0.0984	0.073	0.664	0.0137	0.0931	0.125	0.072	0.134	0.0576	0.0926
1637	1343139	IKZF4	13179	protein domain specific binding	GO:0019904	molecular function	12	86	0.118	0.1	0.0828	0.645	0.0311	0.0844	0.164	0.0678	0.148	0.0482	0.142
1638	1343139	IKZF4	13179	zinc ion binding	GO:0008270	molecular function	12	15	0.128	0.107	0.0955	0.626	0.017	0.107	0.152	0.0853	0.133	0.0723	0.126
1639	1343139	IKZF4	13179	protein-containing complex	GO:0032991	cellular component	12	373	0.152	0.128	0.119	0.586	0.0486	0.0908	0.254	0.0689	0.238	0.0548	0.256
1640	1915110	S100A16	20441	calcium-dependent protein binding	GO:0048306	molecular function	20	7	0.064	0.103	0.015	0.856	0.0166	0.0632	0.0648	0.083	0.129	0.0109	0.0205
1641	1915110	S100A16	20441	extracellular exosome	GO:0070062	cellular component	20	162	0.0923	0.103	0.0556	0.701	0.00578	0.0868	0.0981	0.083	0.129	0.0499	0.0619
1642	1915110	S100A16	20441	RNA binding	GO:0003723	molecular function	20	82	0.094	0.103	0.0571	0.697	0.0184	0.0773	0.114	0.083	0.129	0.0409	0.0798
1643	1915110	S100A16	20441	nucleolus	GO:0005730	cellular component	20	26	0.106	0.103	0.0707	0.669	0.0103	0.0962	0.117	0.083	0.129	0.0591	0.0847
1644	1915110	S100A16	20441	protein binding	GO:0005515	molecular function	20	831	0.108	0.103	0.0725	0.665	0.0133	0.0931	0.125	0.083	0.129	0.0576	0.0912
1645	1915110	S100A16	20441	cytosol	GO:0005829	cellular component	20	164	0.108	0.103	0.0728	0.665	0.00972	0.0981	0.119	0.083	0.129	0.0615	0.0863
1646	1915110	S100A16	20441	nucleus	GO:0005634	cellular component	20	200	0.111	0.103	0.076	0.659	0.0107	0.0996	0.123	0.083	0.129	0.0632	0.0914
1647	1915110	S100A16	20441	protein homodimerization activity	GO:0042803	molecular function	20	34	0.112	0.103	0.0778	0.656	0.00984	0.102	0.124	0.083	0.129	0.0657	0.092
1648	1915110	S100A16	20441	cytoplasm	GO:0005737	cellular component	20	202	0.115	0.103	0.0809	0.65	0.0145	0.099	0.134	0.083	0.129	0.0632	0.104
1649	1915110	S100A16	20441	plasma membrane	GO:0005886	cellular component	20	175	0.121	0.103	0.0877	0.638	0.0175	0.1	0.147	0.083	0.129	0.0658	0.117
1650	1915110	S100A16	20441	calcium ion binding	GO:0005509	molecular function	20	19	0.133	0.11	0.1	0.617	0.0268	0.0996	0.177	0.0786	0.153	0.0663	0.152
1651	1915110	S100A16	20441	extracellular space	GO:0005615	cellular component	20	54	0.149	0.125	0.121	0.59	0.0102	0.134	0.166	0.107	0.145	0.104	0.141
1652	893598	SH2B3	29605	transmembrane receptor protein tyrosine kinase adaptor activity	GO:0005068	molecular function	11	3	0.0694	0.0652	0.0197	0.823	0.0409	0.0597	0.0807	0.0419	0.101	0.00856	0.0454
1653	893598	SH2B3	29605	intracellular signal transduction	GO:0035556	biological process	11	41	0.0697	0.0652	0.0294	0.777	0.00656	0.066	0.0736	0.0419	0.101	0.0255	0.0339
1654	893598	SH2B3	29605	negative regulation of receptor signaling pathway via JAK-STAT	GO:0046426	biological process	11	4	0.0737	0.0652	0.0264	0.791	0.0407	0.0633	0.0859	0.0419	0.101	0.0117	0.06
1655	893598	SH2B3	29605	erythrocyte development	GO:0048821	biological process	11	4	0.0831	0.0738	0.0455	0.726	0.00214	0.0819	0.0844	0.0587	0.0929	0.0436	0.0475
1656	893598	SH2B3	29605	negative regulation of response to cytokine stimulus	GO:0060761	biological process	11	7	0.0856	0.0685	0.0442	0.726	0.0344	0.0623	0.118	0.0407	0.115	0.0226	0.0866
1657	893598	SH2B3	29605	thrombopoietin-mediated signaling pathway	GO:0038163	biological process	11	2	0.0924	0.0775	0.052	0.706	0.0345	0.0673	0.127	0.0433	0.139	0.0264	0.103
1658	893598	SH2B3	29605	plasma membrane	GO:0005886	cellular component	11	175	0.167	0.161	0.141	0.565	0.0114	0.148	0.188	0.137	0.19	0.12	0.166
1659	893598	SH2B3	29605	protein binding	GO:0005515	molecular function	11	831	0.221	0.202	0.202	0.5	0.0143	0.191	0.256	0.169	0.241	0.169	0.241
1660	1859544	SYT6	18638	SNARE binding	GO:0000149	molecular function	15	4	0.0639	0.0128	0.000986	0.981	0.00267	0.0632	0.0646	0.00728	0.0226	0.00056	0.00174
1661	1859544	SYT6	18638	clathrin binding	GO:0030276	molecular function	15	7	0.0639	0.0346	0.00804	0.919	0.0145	0.0632	0.0646	0.0321	0.0373	0.00532	0.0121
1662	1859544	SYT6	18638	exocytic vesicle	GO:0070382	cellular component	15	8	0.0639	0.0346	0.0119	0.884	0.0131	0.0632	0.0646	0.0321	0.0373	0.00913	0.0156
1663	1859544	SYT6	18638	syntaxin binding	GO:0019905	molecular function	15	6	0.0639	0.0346	0.0122	0.881	0.00657	0.0632	0.0646	0.0321	0.0373	0.0108	0.0139
1664	1859544	SYT6	18638	vesicle-mediated transport	GO:0016192	biological process	15	32	0.0641	0.0349	0.0197	0.822	0.00479	0.0631	0.065	0.0325	0.0376	0.0178	0.0218
1665	1859544	SYT6	18638	calcium-ion regulated exocytosis	GO:0017156	biological process	15	9	0.0641	0.0349	0.0169	0.84	0.0117	0.0638	0.0644	0.0325	0.0376	0.0135	0.0212
1666	1859544	SYT6	18638	regulation of dopamine secretion	GO:0014059	biological process	15	6	0.0642	0.0349	0.0199	0.82	0.00468	0.064	0.0644	0.0325	0.0376	0.0181	0.022
1667	1859544	SYT6	18638	cellular response to calcium ion	GO:0071277	biological process	15	5	0.068	0.0402	0.0203	0.82	0.0331	0.0597	0.0775	0.028	0.0577	0.0103	0.0402
1668	1859544	SYT6	18638	acrosomal vesicle exocytosis	GO:0060478	biological process	15	3	0.0695	0.0407	0.0281	0.781	0.0137	0.0629	0.0768	0.0339	0.049	0.0208	0.0378
1669	1859544	SYT6	18638	phosphatidylserine binding	GO:0001786	molecular function	15	6	0.0852	0.0601	0.0458	0.723	0.0265	0.0663	0.109	0.0398	0.0906	0.0277	0.0758
1670	1859544	SYT6	18638	plasma membrane	GO:0005886	cellular component	15	175	0.105	0.0769	0.0688	0.672	0.0243	0.0824	0.134	0.0564	0.105	0.0452	0.105
1671	1859544	SYT6	18638	regulation of calcium ion-dependent exocytosis	GO:0017158	biological process	15	8	0.111	0.0828	0.0764	0.658	0.00668	0.104	0.118	0.0739	0.0927	0.0682	0.0856
1672	1859544	SYT6	18638	calcium ion binding	GO:0005509	molecular function	15	19	0.14	0.113	0.109	0.605	0.02	0.112	0.173	0.0884	0.145	0.0798	0.149
1673	96281	HTR2C	5295	Gq/11-coupled serotonin receptor activity	GO:0001587	molecular function	46	2	0.0639	0.0249	0.00615	0.939	0.00481	0.0632	0.0646	0.0221	0.028	0.00487	0.00777
1674	96281	HTR2C	5295	phospholipase C-activating serotonin receptor signaling pathway	GO:0007208	biological process	46	3	0.0639	0.0249	0.00659	0.936	0.00563	0.0632	0.0646	0.0221	0.028	0.00519	0.00837
1675	96281	HTR2C	5295	G protein-coupled receptor signaling pathway, coupled to cyclic nucleotide second messenger	GO:0007187	biological process	46	8	0.0639	0.0249	0.00829	0.918	0.011	0.0632	0.0646	0.0221	0.028	0.00584	0.0118
1676	96281	HTR2C	5295	integral component of plasma membrane	GO:0005887	cellular component	46	76	0.0639	0.0249	0.0101	0.904	0.00515	0.0632	0.0646	0.0221	0.028	0.00893	0.0113
1677	96281	HTR2C	5295	neurotransmitter receptor activity	GO:0030594	molecular function	46	15	0.0639	0.0249	0.0103	0.902	0.00127	0.0632	0.0646	0.0221	0.028	0.01	0.0106
1678	96281	HTR2C	5295	G protein-coupled serotonin receptor activity	GO:0004993	molecular function	46	10	0.0639	0.0249	0.0105	0.899	0.00375	0.0632	0.0646	0.0221	0.028	0.00965	0.0115
1679	96281	HTR2C	5295	chemical synaptic transmission	GO:0007268	biological process	46	23	0.0639	0.0249	0.0122	0.882	0.00649	0.0632	0.0646	0.0221	0.028	0.0108	0.0138
1680	96281	HTR2C	5295	phospholipase C-activating G protein-coupled receptor signaling pathway	GO:0007200	biological process	46	14	0.0639	0.0249	0.0122	0.881	0.00609	0.0632	0.0646	0.0221	0.028	0.0109	0.0137
1681	96281	HTR2C	5295	G protein-coupled serotonin receptor signaling pathway	GO:0098664	biological process	46	5	0.0639	0.0249	0.0126	0.878	0.0105	0.0632	0.0646	0.0221	0.028	0.0103	0.0152
1682	96281	HTR2C	5295	dendrite	GO:0030425	cellular component	46	24	0.0639	0.0249	0.0128	0.875	0.014	0.0632	0.0646	0.0221	0.028	0.00975	0.0167
1683	96281	HTR2C	5295	G protein-coupled serotonin receptor complex	GO:0098666	cellular component	46	2	0.0639	0.0249	0.0133	0.871	0.00398	0.0632	0.0646	0.0221	0.028	0.0124	0.0143
1684	96281	HTR2C	5295	serotonin binding	GO:0051378	molecular function	46	7	0.0639	0.0249	0.0149	0.856	0.00532	0.0632	0.0646	0.0221	0.028	0.0135	0.0164
1685	96281	HTR2C	5295	1-(4-iodo-2,5-dimethoxyphenyl)propan-2-amine binding	GO:0071886	molecular function	46	3	0.0639	0.0249	0.0154	0.851	0.00682	0.0632	0.0646	0.0221	0.028	0.0136	0.0175
1686	96281	HTR2C	5295	plasma membrane	GO:0005886	cellular component	46	175	0.064	0.0274	0.0188	0.827	0.00686	0.0632	0.0648	0.0257	0.0292	0.0163	0.0217
1687	96281	HTR2C	5295	release of sequestered calcium ion into cytosol	GO:0051209	biological process	46	8	0.0641	0.027	0.0189	0.827	0.00766	0.0631	0.0651	0.0255	0.0285	0.0161	0.0222
1688	96281	HTR2C	5295	response to drug	GO:0042493	biological process	46	14	0.0648	0.0282	0.0205	0.817	0.0112	0.0634	0.0661	0.0239	0.0333	0.0162	0.0259
1689	96281	HTR2C	5295	cGMP-mediated signaling	GO:0019934	biological process	46	6	0.0652	0.0268	0.0189	0.828	0.0177	0.0634	0.067	0.0209	0.0344	0.0132	0.027
1690	96281	HTR2C	5295	positive regulation of phosphatidylinositol biosynthetic process	GO:0010513	biological process	46	4	0.072	0.0361	0.0316	0.768	0.0125	0.0652	0.0795	0.0301	0.0433	0.0243	0.0412
1691	96281	HTR2C	5295	cellular calcium ion homeostasis	GO:0006874	biological process	46	12	0.0727	0.0366	0.033	0.764	0.00656	0.0685	0.0771	0.0307	0.0436	0.0286	0.0381
1692	96281	HTR2C	5295	positive regulation of ERK1 and ERK2 cascade	GO:0070374	biological process	46	15	0.0744	0.0377	0.0342	0.759	0.0171	0.064	0.0865	0.0291	0.049	0.024	0.0487
1693	96281	HTR2C	5295	identical protein binding	GO:0042802	molecular function	46	79	0.076	0.0384	0.0369	0.751	0.00374	0.0732	0.0789	0.0346	0.0426	0.0342	0.0399
1694	96281	HTR2C	5295	protein binding	GO:0005515	molecular function	46	831	0.0777	0.0405	0.0393	0.744	0.00458	0.0759	0.0796	0.0366	0.0449	0.0359	0.043
1695	101834	TUBG1	12417	structural constituent of cytoskeleton	GO:0005200	molecular function	46	8	0.0639	0.0222	0.00498	0.949	0.0036	0.0632	0.0646	0.0196	0.0251	0.00402	0.00617
1696	101834	TUBG1	12417	microtubule nucleation	GO:0007020	biological process	46	6	0.0639	0.0222	0.00927	0.911	0.00669	0.0632	0.0646	0.0196	0.0251	0.00787	0.0109
1697	101834	TUBG1	12417	centrosome	GO:0005813	cellular component	46	32	0.0639	0.0222	0.0096	0.908	0.0057	0.0632	0.0646	0.0196	0.0251	0.00831	0.0111
1698	101834	TUBG1	12417	mitotic cell cycle	GO:0000278	biological process	46	11	0.0639	0.0222	0.00906	0.906	0.0172	0.0632	0.0646	0.0196	0.0251	0.00522	0.0157
1699	101834	TUBG1	12417	spindle	GO:0005819	cellular component	46	5	0.0639	0.0222	0.0107	0.897	0.0098	0.0632	0.0646	0.0196	0.0251	0.00876	0.013
1700	101834	TUBG1	12417	microtubule	GO:0005874	cellular component	46	19	0.0639	0.0222	0.0109	0.896	0.0022	0.0632	0.0646	0.0196	0.0251	0.0103	0.0114
1701	101834	TUBG1	12417	polar microtubule	GO:0005827	cellular component	46	3	0.0639	0.0222	0.0109	0.895	0.00788	0.0632	0.0646	0.0196	0.0251	0.00918	0.013
1702	101834	TUBG1	12417	microtubule cytoskeleton organization	GO:0000226	biological process	46	26	0.0639	0.0222	0.0111	0.894	0.0022	0.0632	0.0646	0.0196	0.0251	0.0106	0.0116
1703	101834	TUBG1	12417	mitotic spindle microtubule	GO:1990498	cellular component	46	4	0.0639	0.0222	0.0115	0.888	0.00823	0.0632	0.0646	0.0196	0.0251	0.00972	0.0137
1704	101834	TUBG1	12417	mitotic sister chromatid segregation	GO:0000070	biological process	46	3	0.0639	0.0222	0.0132	0.872	0.00419	0.0632	0.0646	0.0196	0.0251	0.0123	0.0142
1705	101834	TUBG1	12417	GTP binding	GO:0005525	molecular function	46	13	0.0639	0.0222	0.014	0.864	0.00869	0.0632	0.0646	0.0196	0.0251	0.012	0.0164
1706	101834	TUBG1	12417	mitotic spindle organization	GO:0007052	biological process	46	8	0.0639	0.0222	0.0144	0.86	0.00598	0.0632	0.0646	0.0196	0.0251	0.0129	0.0161
1707	101834	TUBG1	12417	gamma-tubulin complex	GO:0000930	cellular component	46	6	0.0639	0.0226	0.0106	0.892	0.0252	0.0632	0.0646	0.0193	0.0265	0.0061	0.0184
1708	101834	TUBG1	12417	identical protein binding	GO:0042802	molecular function	46	79	0.0647	0.0265	0.0197	0.822	0.0139	0.0635	0.0659	0.0203	0.0345	0.0149	0.026
1709	101834	TUBG1	12417	meiotic spindle organization	GO:0000212	biological process	46	5	0.0665	0.0285	0.0239	0.8	0.016	0.0619	0.0715	0.0211	0.0385	0.017	0.0336
1710	101834	TUBG1	12417	cytoplasm	GO:0005737	cellular component	46	202	0.0683	0.0302	0.0261	0.79	0.0165	0.0643	0.0726	0.0218	0.0419	0.0184	0.0371
1711	101834	TUBG1	12417	nucleus	GO:0005634	cellular component	46	200	0.0699	0.0315	0.0284	0.78	0.0169	0.0635	0.0769	0.0225	0.0442	0.0198	0.0408
1712	101834	TUBG1	12417	recycling endosome	GO:0055037	cellular component	46	10	0.0699	0.0315	0.0288	0.779	0.0138	0.0629	0.0777	0.0237	0.0419	0.0214	0.0387
1713	101834	TUBG1	12417	protein binding	GO:0005515	molecular function	46	831	0.0758	0.0362	0.0358	0.753	0.0196	0.0653	0.0879	0.0244	0.0537	0.0237	0.0543
1714	2136878	B3GALT5	920	N-acetyllactosaminide beta-1,3-N-acetylglucosaminyltransferase activity	GO:0008532	molecular function	16	3	0.0639	0.0382	0.00861	0.919	0.00177	0.0632	0.0646	0.0275	0.0531	0.00818	0.00905
1715	2136878	B3GALT5	920	poly-N-acetyllactosamine biosynthetic process	GO:0030311	biological process	16	5	0.0644	0.0382	0.0183	0.83	0.0135	0.063	0.0658	0.0275	0.0531	0.0139	0.0241
1716	2136878	B3GALT5	920	acetylgalactosaminyltransferase activity	GO:0008376	molecular function	16	15	0.0653	0.0382	0.0208	0.816	0.016	0.0623	0.0684	0.0275	0.0531	0.015	0.0289
1717	2136878	B3GALT5	920	acetylglucosaminyltransferase activity	GO:0008375	molecular function	16	40	0.0658	0.0382	0.0208	0.816	0.0194	0.0617	0.0701	0.0275	0.0531	0.0139	0.0313
1718	2136878	B3GALT5	920	Golgi apparatus	GO:0005794	cellular component	16	55	0.0686	0.0398	0.027	0.786	0.0159	0.0626	0.0753	0.027	0.0587	0.0192	0.0379
1719	2136878	B3GALT5	920	endoplasmic reticulum	GO:0005783	cellular component	16	62	0.0729	0.0405	0.032	0.767	0.0201	0.0634	0.0839	0.0273	0.0601	0.0208	0.0491
1720	2136878	B3GALT5	920	protein glycosylation	GO:0006486	biological process	16	19	0.077	0.0464	0.0357	0.752	0.0287	0.0595	0.0998	0.029	0.0743	0.02	0.0637
1721	2136878	B3GALT5	920	protein binding	GO:0005515	molecular function	16	831	0.124	0.0896	0.0896	0.634	0.0293	0.0916	0.168	0.0548	0.147	0.0548	0.147
1722	98370	SOX8	11203	regulation of transcription by RNA polymerase II	GO:0006357	biological process	12	76	0.0643	0.0402	0.0181	0.833	0.0166	0.0642	0.0644	0.0263	0.0615	0.013	0.025
1723	98370	SOX8	11203	DNA-binding transcription factor activity, RNA polymerase II-specific	GO:0000981	molecular function	12	47	0.0653	0.0402	0.0224	0.807	0.00884	0.0641	0.0664	0.0263	0.0615	0.0187	0.027
1724	98370	SOX8	11203	neural crest cell development	GO:0014032	biological process	12	4	0.0659	0.0402	0.0159	0.848	0.0324	0.0627	0.0693	0.0263	0.0615	0.00822	0.0308
1725	98370	SOX8	11203	sequence-specific double-stranded DNA binding	GO:1990837	molecular function	12	31	0.0664	0.0402	0.0222	0.808	0.0162	0.0631	0.0699	0.0263	0.0615	0.0157	0.0312
1726	98370	SOX8	11203	RNA polymerase II cis-regulatory region sequence-specific DNA binding	GO:0000978	molecular function	12	56	0.0667	0.0402	0.024	0.799	0.0125	0.0634	0.0702	0.0263	0.0615	0.0184	0.0313
1727	98370	SOX8	11203	positive regulation of transcription by RNA polymerase II	GO:0045944	biological process	12	70	0.0676	0.0403	0.0229	0.805	0.0236	0.0601	0.076	0.0262	0.0619	0.0138	0.0379
1728	98370	SOX8	11203	enteric nervous system development	GO:0048484	biological process	12	3	0.0729	0.0436	0.0311	0.769	0.0238	0.061	0.0872	0.0262	0.0728	0.0189	0.051
1729	98370	SOX8	11203	peripheral nervous system development	GO:0007422	biological process	12	3	0.0732	0.0416	0.0331	0.762	0.0184	0.0637	0.0841	0.026	0.0663	0.0225	0.0488
1730	98370	SOX8	11203	negative regulation of transcription by RNA polymerase II	GO:0000122	biological process	12	57	0.0763	0.0427	0.0359	0.753	0.0243	0.0626	0.0931	0.0258	0.0708	0.0217	0.0593
1731	98370	SOX8	11203	morphogenesis of an epithelium	GO:0002009	biological process	12	25	0.079	0.0463	0.034	0.758	0.0395	0.0606	0.103	0.0257	0.0837	0.0152	0.076
1732	98370	SOX8	11203	nucleus	GO:0005634	cellular component	12	200	0.127	0.0933	0.0933	0.628	0.0243	0.0988	0.163	0.0635	0.137	0.0635	0.137
1733	97902	RET	9967	glial cell-derived neurotrophic factor receptor signaling pathway	GO:0035860	biological process	55	3	0.0639	0.0332	0.00739	0.927	0.00863	0.0632	0.0646	0.0298	0.0371	0.00542	0.0101
1734	97902	RET	9967	transmembrane receptor protein tyrosine kinase signaling pathway	GO:0007169	biological process	55	27	0.0639	0.0332	0.00795	0.925	0.00457	0.0632	0.0646	0.0298	0.0371	0.00692	0.00914
1735	97902	RET	9967	transmembrane receptor protein tyrosine kinase activity	GO:0004714	molecular function	55	23	0.0639	0.0332	0.00848	0.916	0.0139	0.0632	0.0646	0.0298	0.0371	0.00584	0.0123
1736	97902	RET	9967	positive regulation of MAPK cascade	GO:0043410	biological process	55	20	0.0639	0.0332	0.00728	0.91	0.0237	0.0632	0.0646	0.0298	0.0371	0.00259	0.0205
1737	97902	RET	9967	activation of MAPK activity	GO:0000187	biological process	55	11	0.0639	0.0332	0.00948	0.901	0.0185	0.0632	0.0646	0.0298	0.0371	0.00546	0.0165
1738	97902	RET	9967	positive regulation of protein kinase B signaling	GO:0051897	biological process	55	6	0.0639	0.0337	0.00731	0.921	0.0183	0.0632	0.0646	0.0298	0.0381	0.00384	0.0139
1739	97902	RET	9967	positive regulation of cell adhesion mediated by integrin	GO:0033630	biological process	55	6	0.0639	0.0338	0.0129	0.874	0.0123	0.0632	0.0646	0.0298	0.0385	0.0102	0.0164
1740	97902	RET	9967	neuron cell-cell adhesion	GO:0007158	biological process	55	2	0.0639	0.0344	0.0127	0.876	0.0137	0.0632	0.0646	0.0297	0.0397	0.00989	0.0163
1741	97902	RET	9967	receptor complex	GO:0043235	cellular component	55	34	0.0639	0.0345	0.0147	0.858	0.0111	0.0632	0.0646	0.0319	0.0373	0.0119	0.0181
1742	97902	RET	9967	positive regulation of cell migration	GO:0030335	biological process	55	37	0.0639	0.0349	0.0161	0.846	0.0136	0.0632	0.0646	0.0297	0.0411	0.0124	0.0209
1743	97902	RET	9967	positive regulation of neuron projection development	GO:0010976	biological process	55	9	0.0655	0.0398	0.0214	0.812	0.0134	0.062	0.0692	0.0307	0.0515	0.0161	0.0284
1744	97902	RET	9967	membrane protein proteolysis	GO:0033619	biological process	55	6	0.0657	0.0386	0.0169	0.84	0.0349	0.0618	0.0698	0.0342	0.0435	0.0082	0.0347
1745	97902	RET	9967	regulation of cell adhesion	GO:0030155	biological process	55	11	0.0704	0.0442	0.0241	0.802	0.0342	0.0638	0.0776	0.0298	0.0657	0.0122	0.0477
1746	97902	RET	9967	axon	GO:0030424	cellular component	55	19	0.0709	0.0467	0.0294	0.777	0.0155	0.0645	0.078	0.0337	0.0649	0.0211	0.0411
1747	97902	RET	9967	endosome membrane	GO:0010008	cellular component	55	15	0.0775	0.0549	0.0385	0.745	0.0155	0.0677	0.0887	0.048	0.0628	0.0279	0.0532
1748	97902	RET	9967	integral component of plasma membrane	GO:0005887	cellular component	55	76	0.0786	0.0541	0.04	0.741	0.0104	0.0707	0.0874	0.0436	0.067	0.0322	0.0495
1749	97902	RET	9967	multicellular organism development	GO:0007275	biological process	55	17	0.0813	0.0524	0.0334	0.756	0.0535	0.0519	0.127	0.026	0.106	0.0118	0.0947
1750	97902	RET	9967	plasma membrane	GO:0005886	cellular component	55	175	0.0838	0.0591	0.0461	0.724	0.00956	0.0757	0.0928	0.0516	0.0678	0.0382	0.0556
1751	97902	RET	9967	positive regulation of kinase activity	GO:0033674	biological process	55	17	0.0846	0.0573	0.0421	0.732	0.0368	0.0614	0.117	0.0324	0.101	0.0203	0.0871
1752	97902	RET	9967	cellular response to retinoic acid	GO:0071300	biological process	55	5	0.109	0.085	0.0745	0.662	0.00898	0.0988	0.121	0.074	0.0976	0.0639	0.0869
1753	97902	RET	9967	protein binding	GO:0005515	molecular function	55	831	0.113	0.0886	0.0786	0.654	0.00263	0.11	0.116	0.0836	0.0938	0.0751	0.0822
1754	97902	RET	9967	calcium ion binding	GO:0005509	molecular function	55	19	0.127	0.0997	0.0939	0.628	0.0192	0.102	0.156	0.0746	0.133	0.0683	0.129
1755	97902	RET	9967	plasma membrane protein complex	GO:0098797	cellular component	55	182	0.253	0.236	0.236	0.468	0.0225	0.202	0.316	0.181	0.308	0.181	0.308
1756	1914361	NAAA	736	fatty acid metabolic process	GO:0006631	biological process	20	20	0.101	0.305	0.0633	0.681	0.0314	0.0734	0.139	0.237	0.392	0.0366	0.11
1757	1914361	NAAA	736	sphingosine metabolic process	GO:0006670	biological process	20	6	0.106	0.305	0.0708	0.669	0.00623	0.0985	0.114	0.237	0.392	0.0636	0.0789
1758	1914361	NAAA	736	transcription factor binding	GO:0008134	molecular function	20	13	0.113	0.305	0.0791	0.653	0.00745	0.104	0.123	0.237	0.392	0.0696	0.0899
1759	1914361	NAAA	736	N-acylethanolamine metabolic process	GO:0070291	biological process	20	3	0.123	0.313	0.0864	0.636	0.0433	0.0785	0.191	0.231	0.425	0.0423	0.177
1760	1914361	NAAA	736	N-acylphosphatidylethanolamine metabolic process	GO:0070292	biological process	20	5	0.173	0.361	0.144	0.557	0.0382	0.115	0.259	0.285	0.457	0.0819	0.254
1761	1914361	NAAA	736	extracellular exosome	GO:0070062	cellular component	20	162	0.191	0.379	0.169	0.534	0.00411	0.184	0.199	0.328	0.438	0.16	0.179
1762	1914361	NAAA	736	lysosome	GO:0005764	cellular component	20	21	0.218	0.379	0.197	0.503	0.0329	0.156	0.306	0.279	0.515	0.129	0.299
1763	1914361	NAAA	736	cytoplasm	GO:0005737	cellular component	20	202	0.347	0.519	0.338	0.39	0.00875	0.32	0.375	0.452	0.596	0.31	0.368
1764	1914361	NAAA	736	fatty acid amide hydrolase activity	GO:0017064	molecular function	20	2	0.418	0.523	0.413	0.338	0.0222	0.347	0.504	0.449	0.609	0.34	0.501
1765	1914361	NAAA	736	N-(long-chain-acyl)ethanolamine deacylase activity	GO:0047412	molecular function	20	2	0.418	0.523	0.413	0.338	0.0256	0.338	0.517	0.449	0.609	0.331	0.514
1766	1914361	NAAA	736	extrinsic component of membrane	GO:0019898	cellular component	20	10	0.451	0.538	0.448	0.317	0.00978	0.416	0.49	0.473	0.612	0.412	0.486
1767	1914361	NAAA	736	N-acylsphingosine amidohydrolase activity	GO:0017040	molecular function	20	4	0.508	0.564	0.505	0.28	0.0203	0.434	0.595	0.505	0.629	0.43	0.594
1768	1914361	NAAA	736	hydrolase activity, acting on carbon-nitrogen (but not peptide) bonds	GO:0016810	molecular function	20	24	0.619	0.618	0.618	0.215	0.0085	0.585	0.655	0.584	0.654	0.584	0.654
1769	1349482	SLC9A3R1	11075	PDZ domain binding	GO:0030165	molecular function	56	8	0.0639	0.103	0.0121	0.881	0.0154	0.0632	0.0646	0.0893	0.118	0.00907	0.0162
1770	1349482	SLC9A3R1	11075	microvillus	GO:0005902	cellular component	56	8	0.0639	0.103	0.0126	0.875	0.0221	0.0632	0.0646	0.0893	0.118	0.008	0.0198
1771	1349482	SLC9A3R1	11075	phosphatase binding	GO:0019902	molecular function	56	5	0.0642	0.103	0.0193	0.824	0.00712	0.0631	0.0653	0.0893	0.118	0.0166	0.0225
1772	1349482	SLC9A3R1	11075	signaling receptor binding	GO:0005102	molecular function	56	73	0.0646	0.103	0.0146	0.859	0.0266	0.0639	0.0652	0.0893	0.118	0.00863	0.0248
1773	1349482	SLC9A3R1	11075	protein self-association	GO:0043621	molecular function	56	4	0.0646	0.103	0.0128	0.87	0.0329	0.0639	0.0654	0.0893	0.118	0.00628	0.0263
1774	1349482	SLC9A3R1	11075	regulation of cell size	GO:0008361	biological process	56	7	0.0669	0.103	0.026	0.79	0.00851	0.0639	0.0701	0.0893	0.118	0.0217	0.0311
1775	1349482	SLC9A3R1	11075	establishment of epithelial cell apical/basal polarity	GO:0045198	biological process	56	8	0.0673	0.103	0.0245	0.797	0.0167	0.0629	0.0721	0.0893	0.118	0.0172	0.0351
1776	1349482	SLC9A3R1	11075	vesicle	GO:0031982	cellular component	56	13	0.0678	0.103	0.0261	0.79	0.0121	0.0627	0.0733	0.0893	0.118	0.0201	0.0339
1777	1349482	SLC9A3R1	11075	beta-catenin binding	GO:0008013	molecular function	56	6	0.0706	0.103	0.0296	0.776	0.0148	0.0644	0.0773	0.0893	0.118	0.0216	0.0407
1778	1349482	SLC9A3R1	11075	maintenance of epithelial cell apical/basal polarity	GO:0045199	biological process	56	3	0.0715	0.103	0.0311	0.77	0.0123	0.0647	0.0789	0.0893	0.118	0.024	0.0403
1779	1349482	SLC9A3R1	11075	chloride channel regulator activity	GO:0017081	molecular function	56	3	0.0766	0.108	0.037	0.75	0.0175	0.0666	0.088	0.0898	0.129	0.0256	0.0534
1780	1349482	SLC9A3R1	11075	positive regulation of intrinsic apoptotic signaling pathway	GO:2001244	biological process	56	12	0.0799	0.106	0.0395	0.741	0.0231	0.0651	0.0981	0.0874	0.129	0.0247	0.0633
1781	1349482	SLC9A3R1	11075	type 2 metabotropic glutamate receptor binding	GO:0031799	molecular function	56	2	0.0845	0.109	0.046	0.724	0.0178	0.0717	0.0996	0.0895	0.133	0.0327	0.0648
1782	1349482	SLC9A3R1	11075	type 3 metabotropic glutamate receptor binding	GO:0031800	molecular function	56	2	0.0861	0.109	0.0479	0.719	0.0164	0.074	0.1	0.0895	0.133	0.035	0.0656
1783	1349482	SLC9A3R1	11075	microvillus assembly	GO:0030033	biological process	56	4	0.091	0.119	0.0521	0.707	0.0274	0.0701	0.118	0.106	0.133	0.0306	0.0887
1784	1349482	SLC9A3R1	11075	renal phosphate ion absorption	GO:0097291	biological process	56	2	0.0923	0.117	0.0556	0.701	0.012	0.0808	0.105	0.108	0.127	0.0442	0.0699
1785	1349482	SLC9A3R1	11075	growth factor receptor binding	GO:0070851	molecular function	56	23	0.0938	0.118	0.0574	0.697	0.00624	0.0881	0.0999	0.103	0.135	0.051	0.0645
1786	1349482	SLC9A3R1	11075	negative regulation of protein kinase B signaling	GO:0051898	biological process	56	3	0.0955	0.122	0.0559	0.696	0.0393	0.0636	0.143	0.0823	0.181	0.0278	0.113
1787	1349482	SLC9A3R1	11075	apical plasma membrane	GO:0016324	cellular component	56	10	0.11	0.128	0.0711	0.662	0.0483	0.0671	0.181	0.0854	0.192	0.032	0.158
1788	1349482	SLC9A3R1	11075	negative regulation of ERK1 and ERK2 cascade	GO:0070373	biological process	56	6	0.114	0.136	0.0787	0.653	0.0214	0.09	0.143	0.103	0.179	0.055	0.113
1789	1349482	SLC9A3R1	11075	protein localization to plasma membrane	GO:0072659	biological process	56	14	0.119	0.139	0.0828	0.643	0.0377	0.0813	0.175	0.0898	0.214	0.0426	0.161
1790	1349482	SLC9A3R1	11075	gland morphogenesis	GO:0022612	biological process	56	10	0.126	0.147	0.0934	0.629	0.0157	0.107	0.149	0.129	0.168	0.0722	0.121
1791	1349482	SLC9A3R1	11075	extracellular exosome	GO:0070062	cellular component	56	162	0.131	0.155	0.099	0.621	0.00392	0.126	0.135	0.142	0.17	0.0929	0.106
1792	1349482	SLC9A3R1	11075	cell periphery	GO:0071944	cellular component	56	7	0.134	0.154	0.0999	0.615	0.0424	0.0854	0.21	0.102	0.233	0.0524	0.19
1793	1349482	SLC9A3R1	11075	beta-2 adrenergic receptor binding	GO:0031698	molecular function	56	2	0.134	0.156	0.102	0.616	0.0169	0.112	0.16	0.124	0.197	0.0778	0.134
1794	1349482	SLC9A3R1	11075	regulation of cell shape	GO:0008360	biological process	56	23	0.138	0.158	0.107	0.608	0.021	0.111	0.172	0.12	0.208	0.077	0.149
1795	1349482	SLC9A3R1	11075	perinuclear region of cytoplasm	GO:0048471	cellular component	56	35	0.146	0.159	0.116	0.595	0.0245	0.112	0.19	0.12	0.21	0.0796	0.169
1796	1349482	SLC9A3R1	11075	membrane	GO:0016020	cellular component	56	157	0.17	0.177	0.146	0.56	0.00665	0.159	0.183	0.15	0.209	0.133	0.16
1797	1349482	SLC9A3R1	11075	nuclear migration	GO:0007097	biological process	56	14	0.171	0.183	0.144	0.56	0.0286	0.126	0.231	0.134	0.249	0.0968	0.213
1798	1349482	SLC9A3R1	11075	establishment of Golgi localization	GO:0051683	biological process	56	4	0.174	0.185	0.148	0.555	0.0268	0.131	0.231	0.136	0.251	0.102	0.215
1799	1349482	SLC9A3R1	11075	protein binding	GO:0005515	molecular function	56	831	0.19	0.189	0.167	0.535	0.0053	0.179	0.201	0.159	0.225	0.156	0.18
1800	1349482	SLC9A3R1	11075	negative regulation of mitotic cell cycle	GO:0045930	biological process	56	15	0.191	0.186	0.168	0.533	0.0253	0.146	0.25	0.137	0.252	0.119	0.236
1801	1349482	SLC9A3R1	11075	negative regulation of canonical Wnt signaling pathway	GO:0090090	biological process	56	21	0.195	0.197	0.169	0.529	0.042	0.126	0.3	0.13	0.3	0.0986	0.289
1802	1349482	SLC9A3R1	11075	negative regulation of cell population proliferation	GO:0008285	biological process	56	45	0.211	0.206	0.189	0.511	0.0291	0.156	0.285	0.147	0.289	0.132	0.272
1803	1349482	SLC9A3R1	11075	cytoplasm	GO:0005737	cellular component	56	202	0.219	0.209	0.201	0.502	0.00649	0.205	0.235	0.179	0.244	0.185	0.218
1804	1349482	SLC9A3R1	11075	protein-membrane adaptor activity	GO:0043495	molecular function	56	16	0.259	0.246	0.241	0.459	0.0465	0.165	0.406	0.151	0.4	0.145	0.4
1805	3039593	TOX3	11972	phosphoprotein binding	GO:0051219	molecular function	13	5	0.0639	0.0496	0.0103	0.889	0.0271	0.0632	0.0646	0.0436	0.0565	0.00514	0.0208
1806	3039593	TOX3	11972	chromatin DNA binding	GO:0031490	molecular function	13	5	0.0639	0.0496	0.0119	0.884	0.00944	0.0632	0.0646	0.0436	0.0565	0.00983	0.0144
1807	3039593	TOX3	11972	chromatin binding	GO:0003682	molecular function	13	13	0.0639	0.0496	0.0134	0.87	0.00306	0.0632	0.0646	0.0436	0.0565	0.0126	0.0142
1808	3039593	TOX3	11972	negative regulation of neuron apoptotic process	GO:0043524	biological process	13	16	0.0644	0.0576	0.0198	0.821	0.0102	0.0639	0.0648	0.0449	0.074	0.0161	0.0244
1809	3039593	TOX3	11972	regulation of apoptotic process	GO:0042981	biological process	13	26	0.0678	0.0551	0.0186	0.832	0.0336	0.061	0.0754	0.0395	0.0768	0.00937	0.0368
1810	3039593	TOX3	11972	transcription coactivator activity	GO:0003713	molecular function	13	7	0.0833	0.0781	0.0431	0.731	0.0265	0.0654	0.106	0.0542	0.113	0.0254	0.0733
1811	3039593	TOX3	11972	regulation of transcription by RNA polymerase II	GO:0006357	biological process	13	76	0.0903	0.0947	0.0533	0.706	0.00654	0.0852	0.0957	0.077	0.117	0.047	0.0604
1812	3039593	TOX3	11972	positive regulation of transcription by RNA polymerase II	GO:0045944	biological process	13	70	0.0925	0.0949	0.0555	0.701	0.0114	0.0832	0.103	0.0769	0.117	0.0449	0.0686
1813	3039593	TOX3	11972	nucleus	GO:0005634	cellular component	13	200	0.114	0.116	0.0805	0.651	0.00341	0.111	0.118	0.11	0.123	0.0761	0.0852
1814	3039593	TOX3	11972	nucleoplasm	GO:0005654	cellular component	13	161	0.134	0.134	0.103	0.615	0.00144	0.133	0.135	0.131	0.137	0.101	0.105
1815	3039593	TOX3	11972	protein homodimerization activity	GO:0042803	molecular function	13	34	0.152	0.137	0.125	0.586	0.00399	0.146	0.159	0.135	0.14	0.117	0.132
1816	3039593	TOX3	11972	cytosol	GO:0005829	cellular component	13	164	0.158	0.137	0.131	0.578	0.00331	0.153	0.163	0.135	0.14	0.125	0.137
1817	3039593	TOX3	11972	protein binding	GO:0005515	molecular function	13	831	0.165	0.142	0.14	0.567	0.0051	0.156	0.175	0.135	0.149	0.13	0.15
1818	1915138	TMEM100	25607	endoplasmic reticulum	GO:0005783	cellular component	11	62	0.133	0.19	0.102	0.616	0.00346	0.129	0.137	0.167	0.215	0.0968	0.108
1819	1915138	TMEM100	25607	plasma membrane	GO:0005886	cellular component	11	175	0.137	0.19	0.105	0.612	0.011	0.122	0.153	0.167	0.215	0.0888	0.125
1820	1915138	TMEM100	25607	protein binding	GO:0005515	molecular function	11	831	0.158	0.19	0.13	0.578	0.0165	0.134	0.187	0.167	0.215	0.103	0.165
1821	1915138	TMEM100	25607	cellular response to BMP stimulus	GO:0071773	biological process	11	6	0.169	0.19	0.143	0.563	0.0116	0.15	0.189	0.167	0.215	0.121	0.168
1822	1915138	TMEM100	25607	perinuclear region of cytoplasm	GO:0048471	cellular component	11	35	0.169	0.19	0.144	0.562	0.00766	0.157	0.183	0.167	0.215	0.129	0.16
1823	1915138	TMEM100	25607	BMP signaling pathway	GO:0030509	biological process	11	21	0.184	0.19	0.16	0.542	0.0218	0.146	0.232	0.167	0.215	0.12	0.214
1824	1915138	TMEM100	25607	perikaryon	GO:0043204	cellular component	11	3	0.224	0.21	0.206	0.497	0.00203	0.22	0.229	0.207	0.214	0.201	0.211
1825	1261422	NAGA	7631	carbohydrate catabolic process	GO:0016052	biological process	11	10	0.125	0.264	0.0894	0.631	0.0425	0.0794	0.196	0.177	0.393	0.043	0.186
1826	1261422	NAGA	7631	glycoside catabolic process	GO:0016139	biological process	11	13	0.136	0.264	0.103	0.611	0.0357	0.093	0.199	0.177	0.393	0.0592	0.18
1827	1261422	NAGA	7631	glycolipid catabolic process	GO:0019377	biological process	11	7	0.153	0.266	0.122	0.585	0.0369	0.103	0.226	0.177	0.401	0.0722	0.207
1828	1261422	NAGA	7631	extracellular exosome	GO:0070062	cellular component	11	162	0.155	0.267	0.128	0.581	0.0104	0.139	0.174	0.183	0.39	0.11	0.15
1829	1261422	NAGA	7631	oligosaccharide metabolic process	GO:0009311	biological process	11	18	0.157	0.264	0.128	0.578	0.0322	0.112	0.222	0.177	0.393	0.0783	0.21
1830	1261422	NAGA	7631	glycosylceramide catabolic process	GO:0046477	biological process	11	6	0.162	0.264	0.135	0.57	0.0292	0.119	0.222	0.177	0.393	0.0872	0.208
1831	1261422	NAGA	7631	alpha-N-acetylgalactosaminidase activity	GO:0008456	molecular function	11	2	0.257	0.329	0.242	0.465	0.00623	0.241	0.274	0.309	0.35	0.225	0.261
1832	1261422	NAGA	7631	protein homodimerization activity	GO:0042803	molecular function	11	34	0.279	0.329	0.266	0.445	0.00442	0.266	0.292	0.309	0.35	0.253	0.279
1833	1261422	NAGA	7631	alpha-galactosidase activity	GO:0004557	molecular function	11	3	0.334	0.34	0.325	0.399	0.0146	0.292	0.383	0.3	0.385	0.281	0.376
1834	1261422	NAGA	7631	cytoplasm	GO:0005737	cellular component	11	202	0.346	0.346	0.337	0.391	0.0164	0.298	0.402	0.307	0.389	0.286	0.397
1835	1890457	SLC15A2	10921	dipeptide transmembrane transporter activity	GO:0071916	molecular function	9	4	0.0639	0.0382	0.00946	0.91	0.00707	0.0632	0.0646	0.0311	0.0471	0.00797	0.0112
1836	1890457	SLC15A2	10921	peptide:proton symporter activity	GO:0015333	molecular function	9	3	0.0639	0.0382	0.0128	0.875	0.0108	0.0632	0.0646	0.0311	0.0471	0.0104	0.0157
1837	1890457	SLC15A2	10921	integral component of plasma membrane	GO:0005887	cellular component	9	76	0.0847	0.0853	0.047	0.722	0.00916	0.0782	0.0917	0.0807	0.0902	0.0393	0.0562
1838	1890457	SLC15A2	10921	dipeptide import across plasma membrane	GO:0140206	biological process	9	3	0.0902	0.0829	0.0526	0.707	0.017	0.0759	0.107	0.0746	0.0921	0.0379	0.073
1839	1890457	SLC15A2	10921	extracellular exosome	GO:0070062	cellular component	9	162	0.121	0.0982	0.0881	0.638	0.0113	0.108	0.136	0.077	0.125	0.0729	0.107
1840	1890457	SLC15A2	10921	protein binding	GO:0005515	molecular function	9	831	0.131	0.0988	0.0988	0.621	0.0161	0.111	0.155	0.0765	0.128	0.0765	0.128
1841	1096372	YBX2	17948	nucleic acid binding	GO:0003676	molecular function	7	10	0.0639	0.0233	0.00819	0.921	0.00861	0.0632	0.0646	0.018	0.0302	0.0062	0.0108
1842	1096372	YBX2	17948	regulation of gene expression	GO:0010468	biological process	7	31	0.0645	0.029	0.0193	0.824	0.0135	0.064	0.0649	0.0221	0.038	0.0148	0.0253
1843	1096372	YBX2	17948	nucleus	GO:0005634	cellular component	7	200	0.0802	0.042	0.042	0.736	0.00506	0.0776	0.083	0.038	0.0464	0.038	0.0464
1844	95524	FGFR3	3690	fibroblast growth factor-activated receptor activity	GO:0005007	molecular function	44	4	0.0639	0.0326	0.00585	0.942	0.00467	0.0632	0.0646	0.0312	0.0339	0.00463	0.00739
1845	95524	FGFR3	3690	transmembrane receptor protein tyrosine kinase signaling pathway	GO:0007169	biological process	44	27	0.0639	0.0326	0.00686	0.932	0.00873	0.0632	0.0646	0.0312	0.0339	0.00473	0.00995
1846	95524	FGFR3	3690	fibroblast growth factor receptor apoptotic signaling pathway	GO:1902178	biological process	44	3	0.0639	0.0326	0.00764	0.921	0.0151	0.0632	0.0646	0.0312	0.0339	0.00456	0.0128
1847	95524	FGFR3	3690	protein tyrosine kinase activity	GO:0004713	molecular function	44	8	0.0639	0.0326	0.00851	0.92	0.00494	0.0632	0.0646	0.0312	0.0339	0.00745	0.00972
1848	95524	FGFR3	3690	positive regulation of MAPK cascade	GO:0043410	biological process	44	20	0.0639	0.0326	0.00921	0.907	0.0158	0.0632	0.0646	0.0312	0.0339	0.00597	0.0142
1849	95524	FGFR3	3690	transmembrane receptor protein tyrosine kinase activity	GO:0004714	molecular function	44	23	0.0639	0.0326	0.0112	0.892	0.0078	0.0632	0.0646	0.0312	0.0339	0.00947	0.0133
1850	95524	FGFR3	3690	peptidyl-tyrosine phosphorylation	GO:0018108	biological process	44	10	0.0639	0.0326	0.0115	0.89	0.00162	0.0632	0.0646	0.0312	0.0339	0.0111	0.0119
1851	95524	FGFR3	3690	protein autophosphorylation	GO:0046777	biological process	44	15	0.0639	0.0326	0.0139	0.865	0.00145	0.0632	0.0646	0.0312	0.0339	0.0135	0.0143
1852	95524	FGFR3	3690	fibroblast growth factor binding	GO:0017134	molecular function	44	6	0.0639	0.0326	0.0158	0.849	0.0104	0.0632	0.0646	0.0312	0.0339	0.013	0.0193
1853	95524	FGFR3	3690	receptor complex	GO:0043235	cellular component	44	34	0.0639	0.0326	0.0123	0.878	0.0255	0.0632	0.0646	0.0312	0.0339	0.00735	0.0206
1854	95524	FGFR3	3690	positive regulation of phospholipase activity	GO:0010518	biological process	44	8	0.064	0.0326	0.0153	0.854	0.0172	0.0632	0.0648	0.0312	0.0339	0.011	0.0212
1855	95524	FGFR3	3690	fibroblast growth factor receptor signaling pathway	GO:0008543	biological process	44	21	0.0646	0.0376	0.0219	0.809	0.00438	0.0637	0.0655	0.0345	0.0409	0.02	0.024
1856	95524	FGFR3	3690	transport vesicle	GO:0030133	cellular component	44	11	0.0656	0.0366	0.0205	0.818	0.0173	0.0619	0.0695	0.029	0.0461	0.0143	0.0294
1857	95524	FGFR3	3690	positive regulation of ERK1 and ERK2 cascade	GO:0070374	biological process	44	15	0.0679	0.042	0.0194	0.826	0.0336	0.0609	0.0757	0.0287	0.0615	0.00979	0.0384
1858	95524	FGFR3	3690	multicellular organism development	GO:0007275	biological process	44	17	0.0712	0.0464	0.028	0.781	0.0242	0.0606	0.0837	0.0308	0.0699	0.0169	0.0466
1859	95524	FGFR3	3690	integral component of plasma membrane	GO:0005887	cellular component	44	76	0.073	0.0488	0.0331	0.763	0.0112	0.0664	0.0803	0.0361	0.066	0.0262	0.042
1860	95524	FGFR3	3690	positive regulation of cell population proliferation	GO:0008284	biological process	44	46	0.0785	0.0504	0.0369	0.749	0.0296	0.0633	0.0974	0.0376	0.0676	0.0199	0.0684
1861	95524	FGFR3	3690	positive regulation of tyrosine phosphorylation of STAT protein	GO:0042531	biological process	44	6	0.0799	0.052	0.0335	0.76	0.0436	0.0596	0.107	0.0294	0.0921	0.014	0.0804
1862	95524	FGFR3	3690	positive regulation of phosphatidylinositol 3-kinase activity	GO:0043552	biological process	44	5	0.0824	0.0526	0.0384	0.741	0.0438	0.0556	0.122	0.0281	0.0985	0.0164	0.0901
1863	95524	FGFR3	3690	Golgi apparatus	GO:0005794	cellular component	44	55	0.0836	0.0577	0.0458	0.725	0.00757	0.0771	0.0907	0.0462	0.072	0.0394	0.0531
1864	95524	FGFR3	3690	plasma membrane	GO:0005886	cellular component	44	175	0.0899	0.0632	0.0529	0.707	0.00648	0.0846	0.0955	0.0521	0.0767	0.0466	0.0599
1865	95524	FGFR3	3690	positive regulation of kinase activity	GO:0033674	biological process	44	17	0.0903	0.0618	0.0511	0.709	0.0288	0.0674	0.121	0.0397	0.0964	0.03	0.0872
1866	95524	FGFR3	3690	identical protein binding	GO:0042802	molecular function	44	79	0.112	0.084	0.0773	0.657	0.0081	0.102	0.123	0.0731	0.0965	0.0673	0.0888
1867	95524	FGFR3	3690	protein binding	GO:0005515	molecular function	44	831	0.125	0.0933	0.092	0.632	0.0111	0.111	0.14	0.0795	0.109	0.0764	0.111
1868	95524	FGFR3	3690	endoplasmic reticulum	GO:0005783	cellular component	44	62	0.128	0.0982	0.0963	0.626	0.00256	0.124	0.133	0.0932	0.104	0.0923	0.1
1869	87934	ADRA2A	281	phospholipase C-activating adrenergic receptor signaling pathway	GO:0071882	biological process	42	3	0.0639	0.0637	0.0147	0.858	0.0108	0.0632	0.0646	0.0482	0.084	0.0121	0.0179
1870	87934	ADRA2A	281	negative regulation of insulin secretion	GO:0046676	biological process	42	5	0.0639	0.0637	0.0151	0.855	0.0128	0.0632	0.0646	0.0482	0.084	0.0119	0.0192
1871	87934	ADRA2A	281	thioesterase binding	GO:0031996	molecular function	42	2	0.0639	0.0637	0.0156	0.85	0.000663	0.0632	0.0646	0.0482	0.084	0.0154	0.0157
1872	87934	ADRA2A	281	adenylate cyclase-activating adrenergic receptor signaling pathway	GO:0071880	biological process	42	7	0.0639	0.0637	0.0158	0.848	0.00216	0.0632	0.0646	0.0482	0.084	0.0153	0.0165
1873	87934	ADRA2A	281	positive regulation of MAP kinase activity	GO:0043406	biological process	42	9	0.0641	0.0637	0.0136	0.865	0.0269	0.0631	0.065	0.0482	0.084	0.00771	0.0239
1874	87934	ADRA2A	281	heterotrimeric G-protein binding	GO:0032795	molecular function	42	2	0.0642	0.0637	0.0179	0.834	0.0187	0.0631	0.0653	0.0482	0.084	0.0125	0.0256
1875	87934	ADRA2A	281	adenylate cyclase-inhibiting adrenergic receptor signaling pathway	GO:0071881	biological process	42	4	0.0644	0.0637	0.018	0.833	0.0143	0.063	0.0658	0.0482	0.084	0.0135	0.024
1876	87934	ADRA2A	281	positive regulation of cell migration	GO:0030335	biological process	42	37	0.0645	0.0637	0.0149	0.857	0.0275	0.0628	0.0663	0.0482	0.084	0.00855	0.0258
1877	87934	ADRA2A	281	adrenergic receptor signaling pathway	GO:0071875	biological process	42	7	0.0649	0.0656	0.023	0.804	0.00146	0.0641	0.0657	0.0508	0.0845	0.0224	0.0236
1878	87934	ADRA2A	281	negative regulation of insulin secretion involved in cellular response to glucose stimulus	GO:0061179	biological process	42	4	0.0651	0.0639	0.0209	0.815	0.0115	0.0624	0.0679	0.0482	0.0846	0.0163	0.0267
1879	87934	ADRA2A	281	positive regulation of epidermal growth factor-activated receptor activity	GO:0045741	biological process	42	6	0.0675	0.0737	0.0166	0.836	0.0443	0.0621	0.0735	0.0555	0.0979	0.00597	0.0463
1880	87934	ADRA2A	281	positive regulation of MAPK cascade	GO:0043410	biological process	42	20	0.0688	0.0658	0.0248	0.796	0.0232	0.0605	0.0782	0.0467	0.0928	0.0152	0.0406
1881	87934	ADRA2A	281	receptor complex	GO:0043235	cellular component	42	34	0.0713	0.0761	0.0253	0.796	0.0384	0.0625	0.0813	0.0555	0.105	0.0117	0.0547
1882	87934	ADRA2A	281	activation of protein kinase B activity	GO:0032148	biological process	42	3	0.075	0.0782	0.0315	0.768	0.0278	0.0645	0.0872	0.0555	0.11	0.0175	0.0568
1883	87934	ADRA2A	281	receptor transactivation	GO:0035624	biological process	42	2	0.0751	0.0781	0.0347	0.757	0.016	0.066	0.0855	0.0555	0.11	0.0248	0.0486
1884	87934	ADRA2A	281	cellular response to hormone stimulus	GO:0032870	biological process	42	21	0.0769	0.0788	0.0341	0.758	0.0316	0.0632	0.0937	0.0549	0.113	0.0176	0.0662
1885	87934	ADRA2A	281	protein heterodimerization activity	GO:0046982	molecular function	42	16	0.0849	0.0908	0.047	0.722	0.00892	0.0789	0.0913	0.0867	0.095	0.0394	0.056
1886	87934	ADRA2A	281	activation of protein kinase activity	GO:0032147	biological process	42	15	0.0853	0.0888	0.0445	0.726	0.0313	0.0642	0.113	0.0529	0.149	0.0239	0.0829
1887	87934	ADRA2A	281	G protein-coupled receptor signaling pathway	GO:0007186	biological process	42	48	0.0909	0.0922	0.0445	0.724	0.0484	0.0645	0.128	0.0543	0.156	0.0168	0.118
1888	87934	ADRA2A	281	integral component of plasma membrane	GO:0005887	cellular component	42	76	0.0934	0.105	0.0568	0.698	0.0109	0.0826	0.106	0.0829	0.132	0.0462	0.0698
1889	87934	ADRA2A	281	positive regulation of cytokine production	GO:0001819	biological process	42	58	0.104	0.108	0.0688	0.672	0.0149	0.089	0.122	0.0822	0.141	0.0529	0.0896
1890	87934	ADRA2A	281	positive regulation of wound healing	GO:0090303	biological process	42	6	0.108	0.12	0.0732	0.664	0.017	0.091	0.129	0.0949	0.152	0.0545	0.0982
1891	87934	ADRA2A	281	alpha2-adrenergic receptor activity	GO:0004938	molecular function	42	2	0.126	0.132	0.0932	0.63	0.015	0.108	0.147	0.104	0.168	0.0726	0.12
1892	87934	ADRA2A	281	G protein-coupled receptor activity	GO:0004930	molecular function	42	56	0.131	0.137	0.0969	0.62	0.0368	0.0883	0.193	0.0872	0.215	0.0523	0.18
1893	87934	ADRA2A	281	positive regulation of membrane protein ectodomain proteolysis	GO:0051044	biological process	42	6	0.135	0.142	0.104	0.614	0.00846	0.125	0.146	0.121	0.166	0.0907	0.119
1894	87934	ADRA2A	281	protein kinase binding	GO:0019901	molecular function	42	38	0.139	0.146	0.108	0.606	0.0193	0.113	0.171	0.118	0.182	0.0798	0.147
1895	87934	ADRA2A	281	alpha-2C adrenergic receptor binding	GO:0031696	molecular function	42	2	0.155	0.159	0.126	0.582	0.022	0.124	0.194	0.119	0.212	0.092	0.173
1896	87934	ADRA2A	281	epinephrine binding	GO:0051379	molecular function	42	2	0.174	0.173	0.143	0.554	0.0531	0.101	0.302	0.0979	0.306	0.0669	0.306
1897	87934	ADRA2A	281	norepinephrine binding	GO:0051380	molecular function	42	2	0.175	0.173	0.144	0.554	0.0515	0.103	0.298	0.0979	0.306	0.069	0.3
1898	87934	ADRA2A	281	identical protein binding	GO:0042802	molecular function	42	79	0.176	0.181	0.152	0.552	0.0104	0.159	0.196	0.155	0.212	0.132	0.175
1899	87934	ADRA2A	281	protein binding	GO:0005515	molecular function	42	831	0.195	0.197	0.173	0.53	0.00961	0.176	0.215	0.175	0.222	0.152	0.196
1900	87934	ADRA2A	281	glucose homeostasis	GO:0042593	biological process	42	6	0.214	0.215	0.189	0.506	0.0464	0.132	0.345	0.142	0.326	0.103	0.348
1901	87934	ADRA2A	281	protein homodimerization activity	GO:0042803	molecular function	42	34	0.226	0.228	0.208	0.495	0.00415	0.218	0.235	0.203	0.257	0.198	0.219
1902	87934	ADRA2A	281	cytoplasm	GO:0005737	cellular component	42	202	0.246	0.244	0.229	0.475	0.0175	0.205	0.294	0.201	0.296	0.185	0.283
1903	87934	ADRA2A	281	negative regulation of lipid catabolic process	GO:0050995	biological process	42	12	0.297	0.288	0.285	0.429	0.0171	0.252	0.351	0.239	0.347	0.237	0.343
1904	1918979	RGS12	9994	GTPase regulator activity	GO:0030695	molecular function	8	8	0.0712	0.0763	0.03	0.774	0.0167	0.0631	0.0804	0.0685	0.085	0.0211	0.0428
1905	1918979	RGS12	9994	cytosol	GO:0005829	cellular component	8	164	0.0954	0.0763	0.059	0.694	0.000515	0.0946	0.0961	0.0685	0.085	0.0584	0.0595
1906	1918979	RGS12	9994	protein binding	GO:0005515	molecular function	8	831	0.0956	0.0763	0.059	0.693	0.0106	0.0865	0.106	0.0685	0.085	0.0485	0.0718
1907	1918979	RGS12	9994	nucleoplasm	GO:0005654	cellular component	8	161	0.105	0.0763	0.0703	0.67	0.00394	0.102	0.109	0.0685	0.085	0.0656	0.0752
1908	1918979	RGS12	9994	nucleolus	GO:0005730	cellular component	8	26	0.111	0.0763	0.0763	0.658	0.00635	0.104	0.117	0.0685	0.085	0.0685	0.085
1909	1927238	MLLT1	7134	fibrillar center	GO:0001650	cellular component	8	7	0.114	0.164	0.0794	0.652	0.0209	0.0925	0.141	0.147	0.183	0.0553	0.114
1910	1927238	MLLT1	7134	nucleoplasm	GO:0005654	cellular component	8	161	0.142	0.164	0.112	0.603	0.0149	0.122	0.165	0.147	0.183	0.0883	0.141
1911	1927238	MLLT1	7134	transcription elongation factor complex	GO:0008023	cellular component	8	10	0.145	0.164	0.114	0.597	0.026	0.111	0.19	0.147	0.183	0.0759	0.172
1912	1927238	MLLT1	7134	cytosol	GO:0005829	cellular component	8	164	0.167	0.164	0.141	0.565	0.00765	0.155	0.18	0.148	0.182	0.126	0.157
1913	1927238	MLLT1	7134	protein binding	GO:0005515	molecular function	8	831	0.187	0.164	0.164	0.539	0.0077	0.173	0.202	0.148	0.182	0.148	0.182
1914	2384914	APPL2	18242	vesicle	GO:0031982	cellular component	23	13	0.0831	0.365	0.0452	0.727	0.00834	0.0767	0.09	0.337	0.395	0.0383	0.0532
1915	2384914	APPL2	18242	endosome	GO:0005768	cellular component	23	27	0.104	0.365	0.0682	0.673	0.0219	0.0822	0.132	0.337	0.395	0.0462	0.101
1916	2384914	APPL2	18242	endosome membrane	GO:0010008	cellular component	23	15	0.114	0.365	0.0792	0.653	0.0185	0.0928	0.14	0.337	0.395	0.0573	0.109
1917	2384914	APPL2	18242	phosphatidylserine binding	GO:0001786	molecular function	23	6	0.124	0.365	0.0915	0.632	0.0139	0.108	0.143	0.337	0.395	0.0727	0.115
1918	2384914	APPL2	18242	phosphatidylinositol binding	GO:0035091	molecular function	23	7	0.153	0.365	0.125	0.584	0.0155	0.129	0.18	0.337	0.395	0.0988	0.158
1919	2384914	APPL2	18242	cytoplasmic vesicle	GO:0031410	cellular component	23	47	0.155	0.365	0.127	0.581	0.0226	0.122	0.198	0.337	0.395	0.0906	0.178
1920	2384914	APPL2	18242	protein homotetramerization	GO:0051289	biological process	23	4	0.159	0.365	0.127	0.576	0.0457	0.0988	0.256	0.337	0.395	0.0669	0.241
1921	2384914	APPL2	18242	protein-containing complex binding	GO:0044877	molecular function	23	86	0.17	0.365	0.145	0.56	0.01	0.153	0.19	0.337	0.395	0.126	0.167
1922	2384914	APPL2	18242	protein import into nucleus	GO:0006606	biological process	23	10	0.207	0.365	0.186	0.516	0.0184	0.17	0.251	0.337	0.395	0.146	0.237
1923	2384914	APPL2	18242	extracellular exosome	GO:0070062	cellular component	23	162	0.207	0.372	0.187	0.515	0.0135	0.18	0.238	0.355	0.39	0.157	0.222
1924	2384914	APPL2	18242	plasma membrane	GO:0005886	cellular component	23	175	0.229	0.372	0.211	0.492	0.00625	0.215	0.245	0.355	0.39	0.196	0.228
1925	2384914	APPL2	18242	identical protein binding	GO:0042802	molecular function	23	79	0.244	0.372	0.228	0.477	0.00714	0.228	0.262	0.355	0.39	0.209	0.249
1926	2384914	APPL2	18242	membrane	GO:0016020	cellular component	23	157	0.247	0.382	0.231	0.474	0.00985	0.224	0.273	0.36	0.404	0.205	0.26
1927	2384914	APPL2	18242	protein binding	GO:0005515	molecular function	23	831	0.333	0.458	0.324	0.401	0.00238	0.326	0.341	0.417	0.502	0.317	0.332
1928	2384914	APPL2	18242	signaling	GO:0023052	biological process	23	8	0.354	0.451	0.345	0.383	0.0291	0.27	0.463	0.361	0.563	0.257	0.462
1929	2384914	APPL2	18242	regulation of G1/S transition of mitotic cell cycle	GO:2000045	biological process	23	5	0.371	0.457	0.361	0.368	0.0446	0.245	0.561	0.362	0.578	0.23	0.566
1930	2384914	APPL2	18242	protein homodimerization activity	GO:0042803	molecular function	23	34	0.377	0.476	0.371	0.368	0.0101	0.345	0.413	0.46	0.493	0.337	0.408
1931	2384914	APPL2	18242	glucose homeostasis	GO:0042593	biological process	23	6	0.428	0.495	0.424	0.332	0.0151	0.378	0.486	0.457	0.537	0.372	0.483
1932	2384914	APPL2	18242	nucleus	GO:0005634	cellular component	23	200	0.434	0.497	0.43	0.329	0.00557	0.414	0.455	0.464	0.534	0.409	0.451
1933	2384914	APPL2	18242	negative regulation of glucose import	GO:0046325	biological process	23	4	0.499	0.521	0.496	0.287	0.0173	0.436	0.571	0.454	0.597	0.433	0.569
1934	2384914	APPL2	18242	transforming growth factor beta receptor signaling pathway	GO:0007179	biological process	23	10	0.66	0.659	0.659	0.19	0.015	0.604	0.722	0.603	0.721	0.603	0.721
1935	1328308	SCRG1	17036	Golgi apparatus	GO:0005794	cellular component	4	55	0.0829	0.124	0.0451	0.727	0.00582	0.0776	0.0885	0.105	0.147	0.0402	0.0506
1936	1328308	SCRG1	17036	protein binding	GO:0005515	molecular function	4	831	0.13	0.127	0.0979	0.623	0.00312	0.127	0.133	0.107	0.15	0.0931	0.103
1937	1328308	SCRG1	17036	neuron projection terminus	GO:0044306	cellular component	4	4	0.159	0.131	0.131	0.577	0.0153	0.136	0.186	0.105	0.164	0.105	0.164
1938	88490	CRABP1	2338	protein binding	GO:0005515	molecular function	3	831	0.106	0.0705	0.0705	0.669	0.0104	0.096	0.116	0.059	0.0843	0.059	0.0843
1939	88549	CSRP1	2469	RNA binding	GO:0003723	molecular function	14	82	0.0739	0.124	0.0334	0.761	0.0209	0.0624	0.0874	0.0832	0.184	0.0217	0.0514
1940	88549	CSRP1	2469	focal adhesion	GO:0005925	cellular component	14	30	0.0745	0.124	0.0352	0.756	0.00788	0.0691	0.0802	0.0832	0.184	0.0298	0.0416
1941	88549	CSRP1	2469	platelet aggregation	GO:0070527	biological process	14	3	0.0873	0.124	0.0368	0.749	0.0574	0.0645	0.118	0.0832	0.184	0.0118	0.115
1942	88549	CSRP1	2469	structural constituent of muscle	GO:0008307	molecular function	14	2	0.0931	0.124	0.0565	0.699	0.0093	0.0839	0.103	0.0832	0.184	0.0476	0.0671
1943	88549	CSRP1	2469	sarcomere organization	GO:0045214	biological process	14	3	0.0977	0.124	0.0576	0.692	0.0378	0.0677	0.141	0.0832	0.184	0.028	0.119
1944	88549	CSRP1	2469	actinin binding	GO:0042805	molecular function	14	3	0.0994	0.124	0.0621	0.685	0.0257	0.0755	0.131	0.0832	0.184	0.0388	0.0994
1945	88549	CSRP1	2469	actin cytoskeleton organization	GO:0030036	biological process	14	25	0.103	0.124	0.0661	0.676	0.0273	0.0776	0.137	0.0832	0.184	0.04	0.109
1946	88549	CSRP1	2469	extracellular exosome	GO:0070062	cellular component	14	162	0.127	0.143	0.0951	0.627	0.00699	0.117	0.139	0.12	0.17	0.0846	0.107
1947	88549	CSRP1	2469	muscle tissue development	GO:0060537	biological process	14	4	0.161	0.173	0.102	0.588	0.0985	0.0654	0.394	0.0845	0.354	0.019	0.543
1948	88549	CSRP1	2469	Z disc	GO:0030018	cellular component	14	5	0.19	0.198	0.16	0.534	0.0553	0.107	0.336	0.127	0.308	0.0746	0.343
1949	88549	CSRP1	2469	cytoplasm	GO:0005737	cellular component	14	202	0.215	0.227	0.196	0.506	0.0153	0.183	0.253	0.186	0.277	0.162	0.238
1950	88549	CSRP1	2469	protein binding	GO:0005515	molecular function	14	831	0.216	0.227	0.197	0.505	0.0165	0.182	0.257	0.186	0.277	0.159	0.244
1951	88549	CSRP1	2469	nucleus	GO:0005634	cellular component	14	200	0.232	0.229	0.215	0.489	0.0117	0.206	0.262	0.191	0.275	0.187	0.248
1952	99828	SLC7A2	11060	L-ornithine transmembrane transport	GO:1903352	biological process	20	8	0.0642	0.0528	0.0152	0.854	0.0232	0.0641	0.0643	0.0421	0.0662	0.00968	0.0239
1953	99828	SLC7A2	11060	amino acid transmembrane transporter activity	GO:0015171	molecular function	20	16	0.0647	0.0528	0.0195	0.824	0.0156	0.0626	0.0669	0.0421	0.0662	0.0142	0.0267
1954	99828	SLC7A2	11060	L-arginine import across plasma membrane	GO:0097638	biological process	20	3	0.0656	0.0528	0.0213	0.813	0.0126	0.063	0.0683	0.0421	0.0662	0.0164	0.0278
1955	99828	SLC7A2	11060	amino acid transport	GO:0006865	biological process	20	18	0.0663	0.0528	0.0221	0.809	0.0151	0.0629	0.0699	0.0421	0.0662	0.016	0.0305
1956	99828	SLC7A2	11060	arginine transmembrane transporter activity	GO:0015181	molecular function	20	8	0.0734	0.0578	0.0337	0.761	0.0135	0.0668	0.0805	0.0412	0.081	0.0253	0.0448
1957	99828	SLC7A2	11060	L-lysine transmembrane transporter activity	GO:0015189	molecular function	20	7	0.0823	0.0584	0.0429	0.732	0.0219	0.0683	0.0993	0.0409	0.0834	0.0275	0.067
1958	99828	SLC7A2	11060	L-ornithine transmembrane transporter activity	GO:0000064	molecular function	20	6	0.0849	0.06	0.0467	0.722	0.0158	0.0738	0.0977	0.044	0.0818	0.0342	0.0636
1959	99828	SLC7A2	11060	plasma membrane	GO:0005886	cellular component	20	175	0.135	0.112	0.103	0.615	0.0102	0.121	0.15	0.088	0.142	0.0876	0.122
1960	99828	SLC7A2	11060	cell junction	GO:0030054	cellular component	20	9	0.148	0.122	0.118	0.592	0.0244	0.115	0.191	0.0885	0.168	0.0806	0.173
1961	2443160	PAG1	30043	negative regulation of T cell activation	GO:0050868	biological process	12	11	0.0639	0.039	0.00993	0.905	0.0063	0.0632	0.0646	0.0331	0.0458	0.00859	0.0115
1962	2443160	PAG1	30043	SH2 domain binding	GO:0042169	molecular function	12	3	0.0639	0.039	0.0136	0.866	0.0164	0.0632	0.0646	0.0331	0.0458	0.00994	0.0187
1963	2443160	PAG1	30043	regulation of T cell activation	GO:0050863	biological process	12	12	0.0642	0.0443	0.0183	0.831	0.0129	0.0631	0.0653	0.0373	0.0526	0.0142	0.0235
1964	2443160	PAG1	30043	intracellular signal transduction	GO:0035556	biological process	12	41	0.0706	0.0539	0.0308	0.771	0.00442	0.0679	0.0734	0.0488	0.0594	0.0279	0.034
1965	2443160	PAG1	30043	membrane raft	GO:0045121	cellular component	12	17	0.0809	0.0596	0.0425	0.734	0.00902	0.0741	0.0882	0.0499	0.0712	0.0356	0.0508
1966	2443160	PAG1	30043	plasma membrane	GO:0005886	cellular component	12	175	0.147	0.138	0.118	0.594	0.0102	0.132	0.164	0.118	0.16	0.101	0.138
1967	2443160	PAG1	30043	protein binding	GO:0005515	molecular function	12	831	0.243	0.226	0.226	0.478	0.0107	0.217	0.271	0.199	0.258	0.199	0.258
1968	1922012	MDGA1	19267	regulation of synaptic membrane adhesion	GO:0099179	biological process	8	3	0.0704	0.109	0.0304	0.773	0.00594	0.0676	0.0732	0.0937	0.126	0.0267	0.0345
1969	1922012	MDGA1	19267	GABA-ergic synapse	GO:0098982	cellular component	8	4	0.0781	0.109	0.0371	0.747	0.0324	0.0587	0.104	0.0937	0.126	0.0194	0.0708
1970	1922012	MDGA1	19267	anchored component of plasma membrane	GO:0046658	cellular component	8	6	0.094	0.119	0.0574	0.697	0.0105	0.0852	0.104	0.115	0.123	0.0473	0.0697
1971	1922012	MDGA1	19267	regulation of presynapse assembly	GO:1905606	biological process	8	7	0.119	0.119	0.0844	0.643	0.0224	0.0928	0.152	0.115	0.123	0.0576	0.124
1972	1922012	MDGA1	19267	Golgi apparatus	GO:0005794	cellular component	8	55	0.122	0.122	0.0891	0.637	0.00463	0.117	0.127	0.112	0.134	0.0823	0.0964
1973	1922012	MDGA1	19267	plasma membrane	GO:0005886	cellular component	8	175	0.15	0.128	0.121	0.59	0.00483	0.143	0.158	0.108	0.152	0.113	0.13
1974	1922012	MDGA1	19267	extracellular space	GO:0005615	cellular component	8	54	0.152	0.138	0.122	0.586	0.0311	0.11	0.21	0.1	0.19	0.0777	0.192
1975	103574	AMPH	471	synaptic vesicle endocytosis	GO:0048488	biological process	16	4	0.0642	0.0705	0.0171	0.839	0.0139	0.0631	0.0653	0.0581	0.0854	0.013	0.0224
1976	103574	AMPH	471	phospholipid binding	GO:0005543	molecular function	16	17	0.0658	0.0705	0.0235	0.801	0.00903	0.0635	0.0682	0.0581	0.0854	0.0194	0.0285
1977	103574	AMPH	471	plasma membrane	GO:0005886	cellular component	16	175	0.0862	0.0736	0.0488	0.717	0.00547	0.082	0.0906	0.0601	0.0902	0.0437	0.0544
1978	103574	AMPH	471	synaptic vesicle	GO:0008021	cellular component	16	9	0.0894	0.0744	0.0515	0.71	0.0189	0.0738	0.108	0.0597	0.0927	0.036	0.0737
1979	103574	AMPH	471	leading edge membrane	GO:0031256	cellular component	16	6	0.099	0.0744	0.063	0.684	0.0145	0.0845	0.116	0.0597	0.0927	0.0485	0.0819
1980	103574	AMPH	471	protein binding	GO:0005515	molecular function	16	831	0.133	0.102	0.102	0.617	0.00929	0.12	0.147	0.0878	0.118	0.0878	0.118
1981	2147993	ARMCX6	26094	mitochondrion	GO:0005739	cellular component	3	93	0.0934	0.0567	0.0567	0.698	0.00994	0.0852	0.102	0.0473	0.068	0.0473	0.068
1982	1277167	ADGRA1	13838	glutamatergic synapse	GO:0098978	cellular component	4	9	0.0639	0.0361	0.0167	0.843	0.0174	0.0632	0.0646	0.0268	0.0484	0.0121	0.023
1983	1277167	ADGRA1	13838	cell surface receptor signaling pathway	GO:0007166	biological process	4	33	0.0646	0.0361	0.0203	0.818	0.011	0.0641	0.0651	0.0268	0.0484	0.0162	0.0254
1984	1277167	ADGRA1	13838	postsynaptic density	GO:0014069	cellular component	4	12	0.0709	0.0361	0.0268	0.788	0.0251	0.0643	0.0782	0.0268	0.0484	0.0158	0.0454
1985	1277167	ADGRA1	13838	plasma membrane	GO:0005886	cellular component	4	175	0.0837	0.0458	0.0458	0.725	0.00983	0.0768	0.0911	0.0377	0.0556	0.0377	0.0556
1986	1341155	GLDC	4313	glycine decarboxylation via glycine cleavage system	GO:0019464	biological process	19	2	0.0639	0.0591	0.00876	0.916	0.00748	0.0632	0.0646	0.0547	0.0639	0.00701	0.0109
1987	1341155	GLDC	4313	pyridoxal phosphate binding	GO:0030170	molecular function	19	5	0.0641	0.0591	0.0183	0.83	0.00776	0.0631	0.065	0.0547	0.0639	0.0156	0.0214
1988	1341155	GLDC	4313	glycine dehydrogenase (decarboxylating) activity	GO:0004375	molecular function	19	2	0.0648	0.0591	0.0191	0.826	0.0158	0.0626	0.0671	0.0547	0.0639	0.0137	0.0265
1989	1341155	GLDC	4313	glycine catabolic process	GO:0006546	biological process	19	7	0.0775	0.0718	0.037	0.75	0.0201	0.0657	0.0914	0.056	0.092	0.0243	0.0562
1990	1341155	GLDC	4313	mitochondrion	GO:0005739	cellular component	19	93	0.08	0.0805	0.0417	0.736	0.00809	0.0752	0.085	0.0672	0.0963	0.0355	0.049
1991	1341155	GLDC	4313	glycine cleavage complex	GO:0005960	cellular component	19	2	0.115	0.105	0.0769	0.652	0.0458	0.0712	0.185	0.0593	0.185	0.0363	0.163
1992	1341155	GLDC	4313	glycine binding	GO:0016594	molecular function	19	5	0.117	0.112	0.083	0.646	0.0144	0.1	0.137	0.0801	0.158	0.0652	0.106
1993	1341155	GLDC	4313	nucleoplasm	GO:0005654	cellular component	19	161	0.163	0.161	0.137	0.57	0.0107	0.146	0.182	0.144	0.178	0.117	0.159
1994	1341155	GLDC	4313	plasma membrane	GO:0005886	cellular component	19	175	0.227	0.209	0.209	0.494	0.00518	0.215	0.24	0.196	0.223	0.196	0.223
1995	2654470	CTDSP1	21614	RNA polymerase II CTD heptapeptide repeat phosphatase activity	GO:0008420	molecular function	13	2	0.0639	0.0407	0.0135	0.869	0.0114	0.0632	0.0646	0.0343	0.0483	0.011	0.0166
1996	2654470	CTDSP1	21614	phosphoprotein phosphatase activity	GO:0004721	molecular function	13	21	0.0646	0.0407	0.0197	0.821	0.0113	0.0639	0.0654	0.0343	0.0483	0.0156	0.025
1997	2654470	CTDSP1	21614	regulation of transcription by RNA polymerase II	GO:0006357	biological process	13	76	0.0649	0.0407	0.0209	0.815	0.00983	0.0636	0.0663	0.0343	0.0483	0.017	0.0257
1998	2654470	CTDSP1	21614	protein dephosphorylation	GO:0006470	biological process	13	18	0.0681	0.0422	0.0186	0.832	0.0376	0.0597	0.0775	0.0333	0.0536	0.00865	0.04
[truncated: 7,542 more rows]

## Sheet: Chd8_down
	entrez_mouse	hgnc_symbol	hgnc_id	go_name	go_id	go_domain	ncon_gene	ncon_go	global_padj	gene_padj	pval	sim	sem_sim	cilow_global_padj	ciupp_global_padj	cilow_gene_padj	ciupp_gene_padj	cilow_pval	ciupp_pval
0	13654	EGR2	3239	intracellular membrane-bounded organelle	GO:0043231	cellular component	36	55	0.07436	0.02389	0.009489	0.9155	0.008726	0.06981	0.0792	0.02113	0.027	0.007058	0.01276
1	13654	EGR2	3239	DNA-binding transcription factor activity, RNA polymerase II-specific	GO:0000981	molecular function	36	29	0.07436	0.02389	0.01206	0.8959	0.01335	0.06981	0.0792	0.02113	0.027	0.008641	0.01684
2	13654	EGR2	3239	protein binding	GO:0005515	molecular function	36	499	0.07436	0.02389	0.01264	0.894	0.005265	0.06981	0.0792	0.02113	0.027	0.01101	0.01452
3	13654	EGR2	3239	ubiquitin protein ligase binding	GO:0031625	molecular function	36	12	0.07436	0.02389	0.0131	0.8897	0.009394	0.06981	0.0792	0.02113	0.027	0.01051	0.01633
4	13654	EGR2	3239	DNA-binding transcription activator activity, RNA polymerase II-specific	GO:0001228	molecular function	36	9	0.07436	0.02389	0.01402	0.882	0.01224	0.06981	0.0792	0.02113	0.027	0.01072	0.01832
5	13654	EGR2	3239	RNA polymerase II cis-regulatory region sequence-specific DNA binding	GO:0000978	molecular function	36	42	0.07436	0.02389	0.01418	0.8811	0.01064	0.06981	0.0792	0.02113	0.027	0.01131	0.01777
6	13654	EGR2	3239	nucleoplasm	GO:0005654	cellular component	36	101	0.07436	0.02389	0.01566	0.8719	0.001492	0.06981	0.0792	0.02113	0.027	0.0152	0.01614
7	13654	EGR2	3239	sequence-specific DNA binding	GO:0043565	molecular function	36	12	0.07436	0.02427	0.01794	0.8519	0.01634	0.06981	0.0792	0.02149	0.0274	0.01307	0.02462
8	13654	EGR2	3239	positive regulation of transcription by RNA polymerase II	GO:0045944	biological process	36	64	0.07501	0.02675	0.01715	0.8561	0.03125	0.06923	0.08127	0.01906	0.03753	0.009314	0.03159
9	13654	EGR2	3239	sequence-specific double-stranded DNA binding	GO:1990837	molecular function	36	29	0.07604	0.02783	0.02325	0.8204	0.02453	0.06834	0.0846	0.01915	0.04043	0.01469	0.0368
10	13654	EGR2	3239	regulation of transcription by RNA polymerase II	GO:0006357	biological process	36	58	0.07875	0.02992	0.02829	0.7944	0.02766	0.06609	0.09383	0.01867	0.04795	0.01673	0.04782
11	13654	EGR2	3239	DNA-binding transcription factor activity	GO:0003700	molecular function	36	13	0.07912	0.03302	0.02944	0.7896	0.02402	0.07105	0.08811	0.02165	0.05035	0.01866	0.04644
12	18390	OPRM1	8156	G-protein alpha-subunit binding	GO:0001965	molecular function	21	2	0.07436	0.02588	0.003291	0.9571	0.003044	0.06981	0.0792	0.02257	0.02967	0.002359	0.004591
13	18390	OPRM1	8156	neuropeptide binding	GO:0042923	molecular function	21	3	0.07436	0.02588	0.004903	0.9466	0.003432	0.06981	0.0792	0.02257	0.02967	0.003829	0.006278
14	18390	OPRM1	8156	morphine receptor activity	GO:0038047	molecular function	21	2	0.07436	0.02588	0.0106	0.9097	0.001927	0.06981	0.0792	0.02257	0.02967	0.009994	0.01124
15	18390	OPRM1	8156	behavioral response to ethanol	GO:0048149	biological process	21	2	0.07436	0.02588	0.01131	0.8994	0.01635	0.06981	0.0792	0.02257	0.02967	0.007426	0.01723
16	18390	OPRM1	8156	beta-endorphin receptor activity	GO:0004979	molecular function	21	4	0.07436	0.02588	0.01261	0.8946	0.001974	0.06981	0.0792	0.02257	0.02967	0.01197	0.01329
17	18390	OPRM1	8156	sensory perception of pain	GO:0019233	biological process	21	4	0.07436	0.02588	0.01389	0.884	0.00901	0.06981	0.0792	0.02257	0.02967	0.01118	0.01725
18	18390	OPRM1	8156	negative regulation of Wnt protein secretion	GO:0061358	biological process	21	5	0.07436	0.02768	0.01689	0.8601	0.02141	0.06981	0.0792	0.02316	0.03309	0.01123	0.02542
19	18390	OPRM1	8156	G-protein beta-subunit binding	GO:0031681	molecular function	21	3	0.07436	0.02781	0.01492	0.8747	0.01307	0.06981	0.0792	0.02118	0.03652	0.01127	0.01976
20	18390	OPRM1	8156	neuron projection	GO:0043005	cellular component	21	28	0.07436	0.02781	0.01533	0.8718	0.01527	0.06981	0.0792	0.02118	0.03652	0.01144	0.02053
21	18390	OPRM1	8156	G protein-coupled receptor activity	GO:0004930	molecular function	21	47	0.07436	0.02822	0.01946	0.843	0.01322	0.06981	0.0792	0.02089	0.03813	0.01531	0.02473
22	18390	OPRM1	8156	peptide binding	GO:0042277	molecular function	21	13	0.07446	0.03092	0.02496	0.8105	0.007308	0.06971	0.07954	0.02425	0.03942	0.02177	0.02863
23	18390	OPRM1	8156	opioid receptor signaling pathway	GO:0038003	biological process	21	3	0.0751	0.02897	0.01847	0.8489	0.02737	0.07085	0.07961	0.02039	0.04117	0.01101	0.03099
24	18390	OPRM1	8156	neuropeptide signaling pathway	GO:0007218	biological process	21	4	0.07654	0.03058	0.02362	0.8181	0.0235	0.07163	0.08179	0.02084	0.04487	0.0152	0.0367
25	18390	OPRM1	8156	integral component of plasma membrane	GO:0005887	cellular component	21	31	0.07959	0.03252	0.02326	0.8201	0.03836	0.07036	0.09004	0.01957	0.05403	0.01131	0.04785
26	18390	OPRM1	8156	protein binding	GO:0005515	molecular function	21	499	0.1177	0.08524	0.07991	0.6582	0.009933	0.1102	0.1258	0.0721	0.1008	0.0676	0.09446
27	18390	OPRM1	8156	regulation of cellular response to stress	GO:0080135	biological process	21	28	0.2948	0.2788	0.2788	0.4358	0.03283	0.2146	0.4048	0.1958	0.3969	0.1958	0.3969
28	70355	GPRC5C	13309	intracellular membrane-bounded organelle	GO:0043231	cellular component	7	55	0.1008	0.1162	0.05912	0.6994	0.02043	0.08229	0.1234	0.09699	0.1392	0.04089	0.08546
29	70355	GPRC5C	13309	receptor complex	GO:0043235	cellular component	7	23	0.1015	0.1162	0.05645	0.7041	0.03434	0.07945	0.1296	0.09699	0.1392	0.03029	0.1052
30	70355	GPRC5C	13309	plasma membrane	GO:0005886	cellular component	7	87	0.1085	0.1162	0.06903	0.679	0.003592	0.102	0.1155	0.09699	0.1392	0.06493	0.0734
31	70355	GPRC5C	13309	extracellular exosome	GO:0070062	cellular component	7	65	0.118	0.1162	0.08041	0.657	0.01585	0.09961	0.1398	0.09699	0.1392	0.06151	0.1051
32	70355	GPRC5C	13309	vesicle	GO:0031982	cellular component	7	8	0.1563	0.1329	0.1251	0.5889	0.01473	0.1357	0.18	0.1135	0.1556	0.1014	0.1542
33	70355	GPRC5C	13309	protein kinase activator activity	GO:0030295	molecular function	7	6	0.1723	0.1514	0.1423	0.5661	0.0266	0.1328	0.2235	0.1095	0.2093	0.09897	0.2046
34	235627	NBEAL2	31928	cytosol	GO:0005829	cellular component	11	84	0.08188	0.07859	0.03555	0.7656	0.02006	0.0715	0.09376	0.05149	0.12	0.02431	0.05198
35	235627	NBEAL2	31928	protein binding	GO:0005515	molecular function	11	499	0.08483	0.07859	0.03858	0.7549	0.02718	0.06975	0.1032	0.05149	0.12	0.02321	0.06415
36	235627	NBEAL2	31928	endoplasmic reticulum	GO:0005783	cellular component	11	40	0.09176	0.07859	0.04838	0.726	0.01966	0.07902	0.1066	0.05149	0.12	0.03382	0.0692
37	235627	NBEAL2	31928	membrane	GO:0016020	cellular component	11	80	0.09281	0.0808	0.04757	0.7262	0.03738	0.06743	0.1277	0.05014	0.1302	0.02433	0.09302
38	235627	NBEAL2	31928	protein kinase binding	GO:0019901	molecular function	11	30	0.09377	0.08553	0.05086	0.7197	0.01701	0.07946	0.1107	0.05817	0.1258	0.03708	0.06976
39	235627	NBEAL2	31928	platelet formation	GO:0030220	biological process	11	3	0.2372	0.233	0.1997	0.4843	0.08779	0.1006	0.5595	0.0756	0.718	0.0648	0.6154
40	235627	NBEAL2	31928	protein localization	GO:0008104	biological process	11	21	0.6219	0.6174	0.6174	0.1983	0.0712	0.4255	0.909	0.4189	0.9098	0.4189	0.9098
41	13653	EGR1	3238	RNA polymerase II transcription regulatory region sequence-specific DNA binding	GO:0000977	molecular function	52	13	0.07436	0.04455	0.01066	0.8951	0.02464	0.06981	0.0792	0.0312	0.06362	0.004878	0.02331
42	13653	EGR1	3238	DNA-binding transcription factor activity, RNA polymerase II-specific	GO:0000981	molecular function	52	29	0.07436	0.04455	0.01329	0.884	0.01897	0.06981	0.0792	0.0312	0.06362	0.00861	0.02051
43	13653	EGR1	3238	transcription regulatory region sequence-specific DNA binding	GO:0000976	molecular function	52	19	0.07436	0.04455	0.01458	0.875	0.02155	0.06981	0.0792	0.0312	0.06362	0.009328	0.02279
44	13653	EGR1	3238	positive regulation of transcription, DNA-templated	GO:0045893	biological process	52	39	0.07436	0.04455	0.01593	0.8687	0.008871	0.06981	0.0792	0.0312	0.06362	0.0135	0.01879
45	13653	EGR1	3238	sequence-specific DNA binding	GO:0043565	molecular function	52	12	0.07436	0.04455	0.0162	0.866	0.009738	0.06981	0.0792	0.0312	0.06362	0.01335	0.01967
46	13653	EGR1	3238	RNA polymerase II cis-regulatory region sequence-specific DNA binding	GO:0000978	molecular function	52	42	0.07436	0.04455	0.01619	0.8652	0.01477	0.06981	0.0792	0.0312	0.06362	0.0121	0.02165
47	13653	EGR1	3238	DNA-binding transcription activator activity, RNA polymerase II-specific	GO:0001228	molecular function	52	9	0.07436	0.04455	0.01593	0.8651	0.01966	0.06981	0.0792	0.0312	0.06362	0.0105	0.02416
48	13653	EGR1	3238	protein binding	GO:0005515	molecular function	52	499	0.07436	0.04455	0.02212	0.8257	0.006162	0.06981	0.0792	0.0312	0.06362	0.01972	0.02482
49	13653	EGR1	3238	nucleus	GO:0005634	cellular component	52	134	0.07436	0.04455	0.02312	0.8202	0.002019	0.06981	0.0792	0.0312	0.06362	0.02229	0.02399
50	13653	EGR1	3238	promoter-specific chromatin binding	GO:1990841	molecular function	52	5	0.07446	0.04455	0.02258	0.8237	0.01522	0.06971	0.07954	0.0312	0.06362	0.01708	0.02985
51	13653	EGR1	3238	nucleoplasm	GO:0005654	cellular component	52	101	0.07458	0.04455	0.02597	0.8054	0.001432	0.07022	0.07921	0.0312	0.06362	0.02527	0.02668
52	13653	EGR1	3238	positive regulation of pri-miRNA transcription by RNA polymerase II	GO:1902895	biological process	52	3	0.07519	0.04462	0.02052	0.8349	0.02765	0.06907	0.08184	0.03116	0.06391	0.01214	0.0347
53	13653	EGR1	3238	cytoplasm	GO:0005737	cellular component	52	107	0.07622	0.04816	0.02938	0.7894	0.006408	0.07286	0.07972	0.03647	0.06361	0.0261	0.03307
54	13653	EGR1	3238	interleukin-1-mediated signaling pathway	GO:0070498	biological process	52	3	0.07692	0.04631	0.02804	0.7959	0.01947	0.06802	0.087	0.03008	0.07129	0.01938	0.04058
55	13653	EGR1	3238	sequence-specific double-stranded DNA binding	GO:1990837	molecular function	52	29	0.07829	0.04631	0.02622	0.805	0.03051	0.06646	0.09223	0.03008	0.07129	0.01481	0.04643
56	13653	EGR1	3238	positive regulation of transcription by RNA polymerase II	GO:0045944	biological process	52	64	0.07831	0.04631	0.02298	0.8216	0.03703	0.06644	0.09231	0.03008	0.07129	0.01144	0.04617
57	13653	EGR1	3238	histone acetyltransferase binding	GO:0035035	molecular function	52	3	0.07875	0.04631	0.02629	0.8042	0.03115	0.06609	0.09383	0.03008	0.07129	0.01461	0.04731
58	13653	EGR1	3238	regulation of transcription by RNA polymerase II	GO:0006357	biological process	52	58	0.08085	0.04739	0.02836	0.7947	0.03762	0.06444	0.1014	0.02942	0.07633	0.01404	0.0573
59	13653	EGR1	3238	DNA-binding transcription factor activity	GO:0003700	molecular function	52	13	0.08297	0.05216	0.03198	0.7793	0.03646	0.06954	0.09899	0.03835	0.07093	0.01621	0.06309
60	13653	EGR1	3238	hemi-methylated DNA-binding	GO:0044729	molecular function	52	2	0.0854	0.0518	0.03872	0.7538	0.03212	0.0652	0.1119	0.03128	0.08577	0.02134	0.07027
61	13653	EGR1	3238	double-stranded methylated DNA binding	GO:0010385	molecular function	52	2	0.08697	0.05222	0.04054	0.748	0.03295	0.06569	0.1152	0.03154	0.08646	0.02209	0.07441
62	13653	EGR1	3238	chromatin	GO:0000785	cellular component	52	19	0.08795	0.05687	0.04484	0.7363	0.01256	0.07612	0.1016	0.04223	0.0766	0.0355	0.05665
63	13653	EGR1	3238	cellular response to interleukin-8	GO:0098759	biological process	52	3	0.08913	0.05584	0.04384	0.7384	0.02897	0.07034	0.113	0.03431	0.09087	0.0255	0.07534
64	13653	EGR1	3238	regulation of protein sumoylation	GO:0033233	biological process	52	5	0.1042	0.0678	0.06342	0.6898	0.02095	0.08368	0.1298	0.05053	0.09098	0.04419	0.09101
65	13653	EGR1	3238	zinc ion binding	GO:0008270	molecular function	52	12	0.1044	0.0678	0.06386	0.6892	0.01907	0.08521	0.1279	0.05053	0.09098	0.04603	0.08859
66	13653	EGR1	3238	DNA binding	GO:0003677	molecular function	52	26	0.1061	0.07009	0.066	0.6849	0.01467	0.09013	0.1249	0.05341	0.09198	0.05118	0.0851
67	13653	EGR1	3238	positive regulation of gene expression	GO:0010628	biological process	52	19	0.1065	0.06821	0.06642	0.6838	0.01757	0.0882	0.1287	0.0511	0.09104	0.04922	0.08963
68	54485	DLL4	2910	negative regulation of blood vessel endothelial cell proliferation involved in sprouting angiogenesis	GO:1903588	biological process	16	3	0.08191	0.1969	0.03538	0.7662	0.02195	0.07143	0.09393	0.1472	0.2633	0.02334	0.05365
69	54485	DLL4	2910	negative regulation of endothelial cell migration	GO:0010596	biological process	16	7	0.08369	0.1969	0.03933	0.7529	0.01287	0.07366	0.09508	0.1472	0.2633	0.03074	0.05031
70	54485	DLL4	2910	Notch binding	GO:0005112	molecular function	16	4	0.09854	0.1969	0.05671	0.7052	0.01803	0.08241	0.1178	0.1472	0.2633	0.04083	0.07877
71	54485	DLL4	2910	cellular response to vascular endothelial growth factor stimulus	GO:0035924	biological process	16	4	0.1283	0.1969	0.09239	0.6366	0.01571	0.1087	0.1515	0.1472	0.2633	0.07142	0.1195
72	54485	DLL4	2910	cellular response to fibroblast growth factor stimulus	GO:0044344	biological process	16	5	0.1365	0.1969	0.1007	0.6228	0.02143	0.1125	0.1657	0.1472	0.2633	0.07268	0.1395
73	54485	DLL4	2910	positive regulation of gene expression	GO:0010628	biological process	16	19	0.1441	0.1969	0.1089	0.6094	0.02948	0.1099	0.189	0.1472	0.2633	0.07009	0.1691
74	54485	DLL4	2910	negative regulation of gene expression	GO:0010629	biological process	16	21	0.157	0.2021	0.1128	0.594	0.06641	0.08541	0.2887	0.1442	0.2831	0.04025	0.3159
75	54485	DLL4	2910	negative regulation of Notch signaling pathway	GO:0045746	biological process	16	5	0.1582	0.1969	0.1267	0.5864	0.01984	0.1327	0.1887	0.1472	0.2633	0.09503	0.1689
76	54485	DLL4	2910	plasma membrane	GO:0005886	cellular component	16	87	0.1617	0.2125	0.1326	0.5794	0.01269	0.1422	0.184	0.1764	0.2559	0.1106	0.1588
77	54485	DLL4	2910	protein binding	GO:0005515	molecular function	16	499	0.1966	0.2277	0.1733	0.5327	0.01	0.1773	0.218	0.1894	0.2737	0.1514	0.1983
78	54485	DLL4	2910	negative regulation of cell population proliferation	GO:0008285	biological process	16	41	0.2053	0.2315	0.1652	0.5277	0.06962	0.1058	0.3981	0.1551	0.3456	0.0613	0.445
79	54485	DLL4	2910	ventral spinal cord interneuron fate commitment	GO:0060579	biological process	16	3	0.2129	0.2513	0.1903	0.5144	0.0236	0.1665	0.2724	0.2424	0.2605	0.1398	0.259
80	54485	DLL4	2910	negative regulation of cell migration involved in sprouting angiogenesis	GO:0090051	biological process	16	3	0.2184	0.2378	0.1974	0.5077	0.02091	0.1763	0.2707	0.1936	0.292	0.1508	0.2584
81	54485	DLL4	2910	Notch signaling pathway	GO:0007219	biological process	16	11	0.2729	0.2704	0.2569	0.4554	0.01825	0.2283	0.3261	0.2419	0.3022	0.208	0.3173
82	78914	NADSYN1	29832	glutaminase activity	GO:0004359	molecular function	29	2	0.07436	0.01557	0.004192	0.9345	0.02522	0.06981	0.0792	0.009636	0.02514	0.001113	0.0158
83	78914	NADSYN1	29832	'de novo' NAD biosynthetic process	GO:0034627	biological process	29	4	0.07436	0.02109	0.008428	0.9234	0.006633	0.06981	0.0792	0.02009	0.02215	0.006513	0.0109
84	78914	NADSYN1	29832	NAD biosynthetic process	GO:0009435	biological process	29	5	0.07436	0.02109	0.01159	0.9017	0.005705	0.06981	0.0792	0.02009	0.02215	0.009976	0.01348
85	78914	NADSYN1	29832	NAD+ synthase (glutamine-hydrolyzing) activity	GO:0003952	molecular function	29	2	0.07436	0.02109	0.01304	0.8918	0.002839	0.06981	0.0792	0.02009	0.02215	0.01217	0.01396
86	78914	NADSYN1	29832	cytoplasm	GO:0005737	cellular component	29	107	0.07436	0.02216	0.01849	0.8498	0.000975	0.06981	0.0792	0.02194	0.02238	0.01826	0.01873
87	78914	NADSYN1	29832	protein binding	GO:0005515	molecular function	29	499	0.07436	0.02287	0.02287	0.8217	0.001565	0.06981	0.0792	0.02225	0.0235	0.02225	0.0235
88	14132	FCGRT	3621	beta-2-microglobulin binding	GO:0030881	molecular function	9	3	0.07436	0.001846	0.0003595	0.9862	0.001819	0.06981	0.0792	0.001256	0.002711	0.0001853	0.0006974
89	14132	FCGRT	3621	IgG binding	GO:0019864	molecular function	9	2	0.07436	0.004757	0.001967	0.9662	0.005769	0.06981	0.0792	0.002425	0.009335	0.0008484	0.004562
90	14132	FCGRT	3621	external side of plasma membrane	GO:0009897	cellular component	9	4	0.07436	0.01651	0.009998	0.9082	0.0158	0.06981	0.0792	0.008482	0.03212	0.006127	0.01631
91	14132	FCGRT	3621	extracellular space	GO:0005615	cellular component	9	29	0.08081	0.04624	0.03577	0.7646	0.01256	0.07519	0.08686	0.0386	0.05538	0.02809	0.04555
92	14132	FCGRT	3621	protein binding	GO:0005515	molecular function	9	499	0.09027	0.05009	0.04714	0.7299	0.01154	0.08238	0.09893	0.04064	0.06173	0.03807	0.05836
93	14132	FCGRT	3621	immune response	GO:0006955	biological process	9	13	0.09384	0.01733	0.009537	0.8363	0.1019	0.05586	0.1576	0.002399	0.1252	0.0007119	0.1278
94	12534	CDK1	1722	RNA polymerase II CTD heptapeptide repeat kinase activity	GO:0008353	molecular function	65	2	0.07436	0.04194	0.00318	0.9571	0.005135	0.06981	0.0792	0.03868	0.04548	0.00181	0.005588
95	12534	CDK1	1722	cyclin-dependent protein serine/threonine kinase activity	GO:0004693	molecular function	65	3	0.07436	0.04194	0.003958	0.9519	0.004983	0.06981	0.0792	0.03868	0.04548	0.002505	0.006255
96	12534	CDK1	1722	cyclin binding	GO:0030332	molecular function	65	2	0.07436	0.04194	0.004691	0.9465	0.006413	0.06981	0.0792	0.03868	0.04548	0.002718	0.008098
97	12534	CDK1	1722	cyclin-dependent protein kinase activity	GO:0097472	molecular function	65	3	0.07436	0.04237	0.006264	0.9339	0.01141	0.06981	0.0792	0.03835	0.04681	0.003455	0.01136
98	12534	CDK1	1722	protein phosphorylation	GO:0006468	biological process	65	30	0.07436	0.04284	0.008121	0.9186	0.01623	0.06981	0.0792	0.03798	0.04831	0.004094	0.01611
99	12534	CDK1	1722	cyclin B1-CDK1 complex	GO:0097125	cellular component	65	2	0.07436	0.04322	0.007862	0.9282	0.001737	0.06981	0.0792	0.04111	0.04543	0.007308	0.008458
100	12534	CDK1	1722	peptidyl-serine phosphorylation	GO:0018105	biological process	65	13	0.07436	0.04322	0.0104	0.9073	0.01286	0.06981	0.0792	0.04111	0.04543	0.007176	0.01506
101	12534	CDK1	1722	spindle microtubule	GO:0005876	cellular component	65	6	0.07436	0.04322	0.01332	0.8844	0.01769	0.06981	0.0792	0.04111	0.04543	0.008844	0.02007
102	12534	CDK1	1722	G2/M transition of mitotic cell cycle	GO:0000086	biological process	65	4	0.07436	0.04364	0.01226	0.8907	0.02101	0.06981	0.0792	0.04145	0.04596	0.007601	0.01977
103	12534	CDK1	1722	mitotic G2 DNA damage checkpoint	GO:0007095	biological process	65	5	0.07436	0.04414	0.01411	0.8834	0.002645	0.06981	0.0792	0.04036	0.04826	0.01325	0.01503
104	12534	CDK1	1722	histone kinase activity	GO:0035173	molecular function	65	6	0.07436	0.04414	0.01538	0.871	0.01446	0.06981	0.0792	0.04036	0.04826	0.01152	0.02053
105	12534	CDK1	1722	positive regulation of G2/M transition of mitotic cell cycle	GO:0010971	biological process	65	7	0.07436	0.04414	0.01564	0.8681	0.01566	0.06981	0.0792	0.04036	0.04826	0.01116	0.02192
106	12534	CDK1	1722	protein serine/threonine kinase activity	GO:0004674	molecular function	65	35	0.07436	0.04457	0.01866	0.8484	0.0108	0.06981	0.0792	0.04091	0.04856	0.01537	0.02265
107	12534	CDK1	1722	positive regulation of mitochondrial ATP synthesis coupled electron transport	GO:1905448	biological process	65	3	0.07436	0.04609	0.01804	0.8492	0.0245	0.06981	0.0792	0.04299	0.04941	0.01099	0.02962
108	12534	CDK1	1722	positive regulation of protein localization to nucleus	GO:1900182	biological process	65	7	0.07436	0.04721	0.02406	0.815	0.003031	0.06981	0.0792	0.04622	0.04821	0.02269	0.02551
109	12534	CDK1	1722	protein kinase activity	GO:0004672	molecular function	65	31	0.07446	0.04518	0.02109	0.8327	0.01724	0.06971	0.07954	0.04046	0.05045	0.01536	0.02896
110	12534	CDK1	1722	peptidyl-threonine phosphorylation	GO:0018107	biological process	65	7	0.07478	0.04538	0.02303	0.8206	0.01461	0.06944	0.08053	0.04032	0.05107	0.01752	0.03026
111	12534	CDK1	1722	mitotic spindle	GO:0072686	cellular component	65	6	0.07612	0.05053	0.02963	0.7884	0.009101	0.07084	0.08181	0.0469	0.05445	0.02501	0.03509
112	12534	CDK1	1722	chromosome, telomeric region	GO:0000781	cellular component	65	7	0.07632	0.04814	0.02491	0.8114	0.02017	0.07245	0.08041	0.04071	0.05691	0.01713	0.03623
113	12534	CDK1	1722	centrosome	GO:0005813	cellular component	65	25	0.07729	0.05149	0.03011	0.7866	0.01187	0.07427	0.08042	0.04824	0.05496	0.02403	0.03774
114	12534	CDK1	1722	cyclin-dependent protein kinase holoenzyme complex	GO:0000307	cellular component	65	25	0.078	0.05097	0.03169	0.7802	0.01151	0.07223	0.08423	0.04918	0.05282	0.02539	0.03956
115	12534	CDK1	1722	protein localization to kinetochore	GO:0034501	biological process	65	6	0.078	0.05252	0.0285	0.7936	0.01911	0.07427	0.08192	0.04656	0.05924	0.01976	0.0411
116	12534	CDK1	1722	nucleus	GO:0005634	cellular component	65	134	0.08308	0.05633	0.03907	0.7537	0.0114	0.07492	0.09213	0.05027	0.06312	0.03138	0.04865
117	12534	CDK1	1722	cytoplasm	GO:0005737	cellular component	65	107	0.0869	0.05736	0.0435	0.7403	0.008822	0.07992	0.09449	0.05172	0.0636	0.03686	0.05133
118	12534	CDK1	1722	cytosol	GO:0005829	cellular component	65	84	0.08826	0.05799	0.04501	0.7359	0.01144	0.07891	0.09872	0.05228	0.06431	0.03632	0.05579
119	12534	CDK1	1722	midbody	GO:0030496	cellular component	65	10	0.09017	0.06179	0.04717	0.7299	0.01137	0.0833	0.09761	0.05609	0.06807	0.03819	0.05825
120	12534	CDK1	1722	regulation of circadian rhythm	GO:0042752	biological process	65	9	0.09215	0.06211	0.0493	0.7238	0.01529	0.08233	0.1031	0.05589	0.06902	0.03728	0.06521
121	12534	CDK1	1722	nucleoplasm	GO:0005654	cellular component	65	101	0.09309	0.06141	0.05051	0.7209	0.01042	0.08447	0.1026	0.05398	0.06987	0.04163	0.06127
122	12534	CDK1	1722	mitochondrial matrix	GO:0005759	cellular component	65	6	0.0974	0.06667	0.05576	0.7079	0.009193	0.08716	0.1088	0.06168	0.07206	0.04715	0.06595
123	12534	CDK1	1722	negative regulation of apoptotic process	GO:0043066	biological process	65	26	0.1011	0.07006	0.05826	0.7008	0.02594	0.08105	0.1261	0.04873	0.1007	0.03703	0.09167
124	12534	CDK1	1722	protein binding	GO:0005515	molecular function	65	499	0.1159	0.08505	0.07724	0.6629	0.01383	0.1007	0.1334	0.06686	0.1082	0.06106	0.09772
125	12534	CDK1	1722	extracellular exosome	GO:0070062	cellular component	65	65	0.1224	0.09076	0.08456	0.6491	0.02127	0.09941	0.1508	0.0664	0.1241	0.05926	0.1207
126	12534	CDK1	1722	membrane	GO:0016020	cellular component	65	80	0.1452	0.1152	0.113	0.6059	0.01068	0.1291	0.1633	0.09958	0.1333	0.09624	0.1326
127	12534	CDK1	1722	epithelial cell differentiation	GO:0030855	biological process	65	28	0.1616	0.1325	0.1298	0.5814	0.02571	0.1279	0.2042	0.09435	0.186	0.08899	0.1894
128	210530	P3H2	19317	procollagen-proline 3-dioxygenase activity	GO:0019797	molecular function	12	3	0.1153	0.2594	0.07348	0.6676	0.03456	0.08399	0.1584	0.2174	0.3095	0.04187	0.129
129	210530	P3H2	19317	peptidyl-proline hydroxylation	GO:0019511	biological process	12	6	0.1313	0.2594	0.09539	0.6318	0.01523	0.1128	0.1529	0.2174	0.3095	0.07506	0.1212
130	210530	P3H2	19317	intracellular membrane-bounded organelle	GO:0043231	cellular component	12	55	0.1423	0.2594	0.1067	0.6111	0.03681	0.0984	0.2059	0.2174	0.3095	0.06019	0.1891
131	210530	P3H2	19317	cytosol	GO:0005829	cellular component	12	84	0.1729	0.2594	0.1446	0.5642	0.01799	0.1437	0.208	0.2174	0.3095	0.1125	0.186
132	210530	P3H2	19317	nucleoplasm	GO:0005654	cellular component	12	101	0.1818	0.2594	0.1546	0.5523	0.0199	0.1483	0.2229	0.2174	0.3095	0.1182	0.2023
133	210530	P3H2	19317	collagen metabolic process	GO:0032963	biological process	12	4	0.1971	0.2676	0.1699	0.5339	0.03182	0.1441	0.2697	0.2333	0.3069	0.1117	0.2584
134	210530	P3H2	19317	endoplasmic reticulum	GO:0005783	cellular component	12	40	0.2492	0.2728	0.2319	0.4767	0.01645	0.21	0.2956	0.2411	0.3086	0.1906	0.2822
135	210530	P3H2	19317	Golgi apparatus	GO:0005794	cellular component	12	24	0.2737	0.2815	0.2584	0.4545	0.01341	0.239	0.3134	0.2496	0.3175	0.2216	0.3013
136	210530	P3H2	19317	negative regulation of cell population proliferation	GO:0008285	biological process	12	41	0.363	0.3686	0.3497	0.3797	0.04739	0.2357	0.5591	0.253	0.5371	0.2189	0.5585
137	272322	ARNTL2	18984	E-box binding	GO:0070888	molecular function	14	3	0.07436	0.0531	0.007728	0.9267	0.007961	0.06981	0.0792	0.03373	0.08359	0.005082	0.01175
138	272322	ARNTL2	18984	DNA-binding transcription factor activity, RNA polymerase II-specific	GO:0000981	molecular function	14	29	0.07656	0.0531	0.02583	0.8071	0.02324	0.07161	0.08186	0.03373	0.08359	0.01678	0.03977
139	272322	ARNTL2	18984	RNA polymerase II cis-regulatory region sequence-specific DNA binding	GO:0000978	molecular function	14	42	0.0788	0.0531	0.02825	0.7949	0.02405	0.07099	0.08746	0.03373	0.08359	0.01791	0.04455
140	272322	ARNTL2	18984	positive regulation of transcription, DNA-templated	GO:0045893	biological process	14	39	0.08034	0.0531	0.03016	0.7869	0.02927	0.07105	0.09086	0.03373	0.08359	0.01746	0.0521
141	272322	ARNTL2	18984	nucleus	GO:0005634	cellular component	14	134	0.08206	0.06183	0.03792	0.7578	0.004067	0.08085	0.08329	0.05209	0.07338	0.03506	0.04102
142	272322	ARNTL2	18984	circadian rhythm	GO:0007623	biological process	14	11	0.08316	0.0531	0.03419	0.7709	0.02908	0.07126	0.09705	0.03373	0.08359	0.01974	0.0592
143	272322	ARNTL2	18984	regulation of transcription by RNA polymerase II	GO:0006357	biological process	14	58	0.08675	0.0531	0.03596	0.765	0.04032	0.07176	0.1049	0.03373	0.08359	0.017	0.07607
144	272322	ARNTL2	18984	DNA-binding transcription factor activity	GO:0003700	molecular function	14	13	0.08788	0.0534	0.03775	0.7573	0.04094	0.06854	0.1127	0.03368	0.08468	0.0177	0.08049
145	272322	ARNTL2	18984	positive regulation of transcription by RNA polymerase II	GO:0045944	biological process	14	64	0.09069	0.05714	0.0435	0.7391	0.03574	0.06953	0.1183	0.03454	0.09451	0.0224	0.08445
146	272322	ARNTL2	18984	nucleoplasm	GO:0005654	cellular component	14	101	0.09345	0.0662	0.05094	0.72	0.004377	0.09221	0.09472	0.06057	0.07236	0.04699	0.05522
147	272322	ARNTL2	18984	aryl hydrocarbon receptor complex	GO:0034751	cellular component	14	5	0.09952	0.07063	0.04632	0.7302	0.0509	0.07955	0.1245	0.06153	0.08108	0.01816	0.1181
148	272322	ARNTL2	18984	nucleolus	GO:0005730	cellular component	14	16	0.1104	0.07563	0.07119	0.6746	0.008774	0.1004	0.1213	0.07298	0.07837	0.06123	0.08277
149	69748	ALDH16A1	28114	membrane	GO:0016020	cellular component	2	80	0.1213	0.1159	0.08333	0.6516	0.0168	0.1028	0.143	0.1116	0.1205	0.06336	0.1096
150	69748	ALDH16A1	28114	protein binding	GO:0005515	molecular function	2	499	0.1478	0.1159	0.1159	0.602	0.002637	0.1417	0.154	0.1116	0.1205	0.1116	0.1205
151	108000	CENPF	1857	ciliary transition fiber	GO:0097539	cellular component	29	2	0.07436	0.1361	0.0168	0.8625	0.006029	0.06981	0.0792	0.0844	0.2196	0.01512	0.01866
152	108000	CENPF	1857	condensed chromosome outer kinetochore	GO:0000940	cellular component	29	3	0.07451	0.1361	0.02074	0.8346	0.01123	0.07012	0.07917	0.0844	0.2196	0.01686	0.02551
153	108000	CENPF	1857	protein C-terminus binding	GO:0008022	molecular function	29	6	0.07519	0.1361	0.02231	0.8252	0.02521	0.06907	0.08184	0.0844	0.2196	0.01399	0.03557
154	108000	CENPF	1857	regulation of G2/M transition of mitotic cell cycle	GO:0010389	biological process	29	7	0.08548	0.1361	0.02889	0.7915	0.05374	0.06109	0.1196	0.0844	0.2196	0.01077	0.07752
155	108000	CENPF	1857	metaphase plate congression	GO:0051310	biological process	29	5	0.08672	0.1361	0.03669	0.7598	0.04466	0.06063	0.124	0.0844	0.2196	0.01618	0.08322
156	108000	CENPF	1857	mitotic cell cycle	GO:0000278	biological process	29	9	0.08702	0.1477	0.0427	0.7418	0.0237	0.06953	0.1089	0.09433	0.2313	0.02746	0.06639
157	108000	CENPF	1857	chromosome, centromeric region	GO:0000775	cellular component	29	4	0.08808	0.1477	0.04346	0.7398	0.02305	0.07146	0.1086	0.09433	0.2313	0.02824	0.0669
158	108000	CENPF	1857	spindle	GO:0005819	cellular component	29	7	0.08993	0.1573	0.04636	0.732	0.01378	0.08293	0.09751	0.1111	0.2228	0.03584	0.05997
159	108000	CENPF	1857	transcription factor binding	GO:0008134	molecular function	29	14	0.105	0.1535	0.06413	0.6877	0.02706	0.07959	0.1384	0.1002	0.2351	0.04026	0.1022
160	108000	CENPF	1857	midbody	GO:0030496	cellular component	29	10	0.1202	0.1624	0.07942	0.6552	0.03932	0.08221	0.1757	0.1038	0.254	0.04133	0.1526
161	108000	CENPF	1857	dynein complex binding	GO:0070840	molecular function	29	2	0.134	0.1713	0.08711	0.6294	0.08038	0.06125	0.293	0.09114	0.322	0.02636	0.2879
162	108000	CENPF	1857	chromosome segregation	GO:0007059	biological process	29	5	0.1365	0.1655	0.09412	0.6246	0.06064	0.07651	0.2436	0.09857	0.278	0.03518	0.2518
163	108000	CENPF	1857	negative regulation of transcription, DNA-templated	GO:0045892	biological process	29	42	0.1397	0.1839	0.1063	0.615	0.01661	0.117	0.1668	0.143	0.2364	0.08209	0.1375
164	108000	CENPF	1857	kinetochore	GO:0000776	cellular component	29	5	0.1423	0.181	0.1084	0.6104	0.02552	0.11	0.184	0.142	0.2308	0.07323	0.1606
165	108000	CENPF	1857	cytoplasm	GO:0005737	cellular component	29	107	0.1482	0.1819	0.1162	0.6015	0.006571	0.1404	0.1564	0.1439	0.2299	0.1054	0.1281
166	108000	CENPF	1857	nucleus	GO:0005634	cellular component	29	134	0.1565	0.1853	0.1256	0.5888	0.007434	0.1475	0.1662	0.1516	0.2266	0.1127	0.14
167	108000	CENPF	1857	protein homodimerization activity	GO:0042803	molecular function	29	26	0.1664	0.1871	0.1379	0.5726	0.01371	0.1443	0.1919	0.1413	0.2478	0.1137	0.1673
168	108000	CENPF	1857	nuclear matrix	GO:0016363	cellular component	29	5	0.1721	0.1871	0.1439	0.5643	0.02639	0.1314	0.2254	0.1413	0.2478	0.09866	0.2098
169	108000	CENPF	1857	spindle pole	GO:0000922	cellular component	29	5	0.1741	0.1871	0.1469	0.5615	0.01652	0.147	0.2063	0.1413	0.2478	0.1164	0.1854
170	108000	CENPF	1857	protein transport	GO:0015031	biological process	29	26	0.1814	0.1981	0.1537	0.5513	0.03481	0.1271	0.2588	0.1353	0.29	0.09629	0.2454
171	108000	CENPF	1857	nuclear envelope	GO:0005635	cellular component	29	2	0.1816	0.1982	0.1527	0.5509	0.04158	0.119	0.277	0.1353	0.2903	0.08671	0.269
172	108000	CENPF	1857	nucleoplasm	GO:0005654	cellular component	29	101	0.1842	0.1986	0.1584	0.5488	0.009026	0.1701	0.1994	0.1693	0.2329	0.1399	0.1794
173	108000	CENPF	1857	protein binding	GO:0005515	molecular function	29	499	0.1991	0.2055	0.1761	0.5301	0.006321	0.1852	0.2142	0.1764	0.2393	0.1617	0.1918
174	108000	CENPF	1857	kidney development	GO:0001822	biological process	29	5	0.2528	0.2483	0.228	0.4695	0.06376	0.1368	0.4674	0.1289	0.4785	0.1105	0.4705
175	108000	CENPF	1857	ventricular system development	GO:0021591	biological process	29	2	0.3258	0.3108	0.3108	0.406	0.05344	0.2021	0.5252	0.1856	0.5204	0.1856	0.5204
176	14282	FOSB	3797	DNA-binding transcription factor activity, RNA polymerase II-specific	GO:0000981	molecular function	12	29	0.07436	0.021	0.007471	0.9224	0.01773	0.06981	0.0792	0.01776	0.02483	0.003796	0.0147
177	14282	FOSB	3797	RNA polymerase II cis-regulatory region sequence-specific DNA binding	GO:0000978	molecular function	12	42	0.07436	0.021	0.008883	0.9142	0.01803	0.06981	0.0792	0.01776	0.02483	0.005018	0.01572
178	14282	FOSB	3797	sequence-specific double-stranded DNA binding	GO:1990837	molecular function	12	29	0.07436	0.021	0.01269	0.8859	0.02395	0.06981	0.0792	0.01776	0.02483	0.007305	0.02206
179	14282	FOSB	3797	nucleus	GO:0005634	cellular component	12	134	0.07436	0.02345	0.01602	0.8689	0.004822	0.06981	0.0792	0.01998	0.02752	0.01459	0.0176
180	14282	FOSB	3797	nucleoplasm	GO:0005654	cellular component	12	101	0.07436	0.02345	0.01929	0.8438	0.003881	0.06981	0.0792	0.01998	0.02752	0.01809	0.02058
181	14282	FOSB	3797	protein binding	GO:0005515	molecular function	12	499	0.07436	0.02413	0.022	0.8266	0.006515	0.06981	0.0792	0.01974	0.02949	0.01941	0.02493
182	14282	FOSB	3797	regulation of transcription by RNA polymerase II	GO:0006357	biological process	12	58	0.0745	0.02204	0.01458	0.8711	0.03222	0.06968	0.07964	0.01699	0.02858	0.007437	0.02857
183	14282	FOSB	3797	intracellular membrane-bounded organelle	GO:0043231	cellular component	12	55	0.07469	0.02415	0.02128	0.8314	0.01605	0.07033	0.07933	0.01973	0.02954	0.01583	0.0286
184	108153	ADAMTS7	223	extracellular matrix	GO:0031012	cellular component	9	13	0.2837	0.5962	0.2674	0.4447	0.03295	0.2057	0.3911	0.4247	0.8369	0.1878	0.3807
185	108153	ADAMTS7	223	extracellular matrix organization	GO:0030198	biological process	9	15	0.2952	0.5962	0.2756	0.4288	0.06509	0.1617	0.5391	0.4247	0.8369	0.1419	0.5353
186	108153	ADAMTS7	223	proteolysis involved in cellular protein catabolic process	GO:0051603	biological process	9	11	0.3038	0.5962	0.277	0.4124	0.09695	0.13	0.7099	0.4247	0.8369	0.1055	0.7275
187	108153	ADAMTS7	223	negative regulation of chondrocyte differentiation	GO:0032331	biological process	9	5	0.3421	0.5962	0.3277	0.3932	0.05432	0.2115	0.5533	0.4247	0.8369	0.1958	0.5486
188	108153	ADAMTS7	223	metalloendopeptidase activity	GO:0004222	molecular function	9	6	0.4058	0.5962	0.393	0.3381	0.07678	0.2214	0.7437	0.4247	0.8369	0.207	0.7462
189	108153	ADAMTS7	223	protein binding	GO:0005515	molecular function	9	499	0.4808	0.5962	0.4749	0.3036	0.02593	0.3937	0.5872	0.4247	0.8369	0.3869	0.5829
190	108153	ADAMTS7	223	cellular response to BMP stimulus	GO:0071773	biological process	9	5	0.5211	0.5962	0.5158	0.272	0.04946	0.371	0.7321	0.4247	0.8369	0.3641	0.7308
191	108153	ADAMTS7	223	cellular response to tumor necrosis factor	GO:0071356	biological process	9	4	0.6477	0.6517	0.6442	0.1917	0.05415	0.4571	0.9177	0.4557	0.9319	0.4512	0.9197
192	108153	ADAMTS7	223	cellular response to interleukin-1	GO:0071347	biological process	9	4	0.6543	0.6517	0.651	0.1865	0.05579	0.46	0.9306	0.4557	0.9319	0.4543	0.9329
193	108897	AIF1L	28904	actin cytoskeleton	GO:0015629	cellular component	9	8	0.08191	0.08741	0.03553	0.7658	0.02314	0.06895	0.09731	0.06727	0.1136	0.02289	0.05513
194	108897	AIF1L	28904	ruffle assembly	GO:0097178	biological process	9	3	0.08636	0.08741	0.03973	0.7516	0.02764	0.07141	0.1044	0.06727	0.1136	0.02352	0.0671
195	108897	AIF1L	28904	actin filament binding	GO:0051015	molecular function	9	9	0.08897	0.08741	0.04105	0.7471	0.03388	0.07155	0.1106	0.06727	0.1136	0.02168	0.07773
196	108897	AIF1L	28904	actin filament bundle assembly	GO:0051017	biological process	9	8	0.09091	0.08741	0.04724	0.7291	0.0217	0.07444	0.111	0.06727	0.1136	0.03137	0.07112
197	108897	AIF1L	28904	focal adhesion	GO:0005925	cellular component	9	15	0.09463	0.09673	0.04878	0.7244	0.03048	0.07947	0.1127	0.08953	0.1045	0.02768	0.08596
198	108897	AIF1L	28904	calcium ion binding	GO:0005509	molecular function	9	16	0.0991	0.08741	0.05684	0.7044	0.02291	0.0796	0.1234	0.06727	0.1136	0.03749	0.08616
199	108897	AIF1L	28904	ruffle membrane	GO:0032587	cellular component	9	4	0.1406	0.1251	0.1009	0.6166	0.05091	0.08578	0.2305	0.07357	0.2128	0.04785	0.2128
200	108897	AIF1L	28904	extracellular exosome	GO:0070062	cellular component	9	65	0.1806	0.1675	0.1548	0.5528	0.006566	0.1703	0.1915	0.1472	0.1905	0.1415	0.1695
201	108897	AIF1L	28904	actin filament	GO:0005884	cellular component	9	6	0.1815	0.1702	0.1559	0.5516	0.008253	0.1654	0.199	0.1518	0.1907	0.1393	0.1745
202	64099	PARVG	14654	actin binding	GO:0003779	molecular function	9	5	0.07436	0.06918	0.01529	0.8747	0.002679	0.06981	0.0792	0.0566	0.08455	0.01451	0.01612
203	64099	PARVG	14654	actin cytoskeleton reorganization	GO:0031532	biological process	9	5	0.07436	0.06918	0.01908	0.8458	0.008654	0.06981	0.0792	0.0566	0.08455	0.01636	0.02225
204	64099	PARVG	14654	actin cytoskeleton	GO:0015629	cellular component	9	8	0.07469	0.06918	0.0232	0.8197	0.01015	0.07033	0.07933	0.0566	0.08455	0.01911	0.02815
205	64099	PARVG	14654	establishment or maintenance of cell polarity	GO:0007163	biological process	9	15	0.09231	0.09215	0.04711	0.729	0.03005	0.0728	0.1171	0.05995	0.1417	0.02695	0.08237
206	64099	PARVG	14654	focal adhesion	GO:0005925	cellular component	9	15	0.09729	0.09725	0.05334	0.7123	0.02624	0.08185	0.1156	0.07096	0.1333	0.03278	0.08682
207	64099	PARVG	14654	cell projection assembly	GO:0030031	biological process	9	9	0.1054	0.1027	0.06443	0.6875	0.02135	0.08552	0.1299	0.07863	0.1342	0.04408	0.09419
208	64099	PARVG	14654	substrate adhesion-dependent cell spreading	GO:0034446	biological process	9	3	0.1596	0.1562	0.1272	0.5834	0.03521	0.1119	0.2277	0.1025	0.2381	0.07701	0.2102
209	64099	PARVG	14654	cytoplasm	GO:0005737	cellular component	9	107	0.2007	0.2061	0.1778	0.5284	0.007093	0.1872	0.2152	0.1807	0.2352	0.1616	0.1956
210	64099	PARVG	14654	protein binding	GO:0005515	molecular function	9	499	0.2333	0.2144	0.2144	0.4929	0.006941	0.2179	0.2498	0.1967	0.2337	0.1967	0.2337
211	14281	FOS	3796	R-SMAD binding	GO:0070412	molecular function	39	2	0.07436	0.02734	0.003084	0.9576	0.005237	0.06981	0.0792	0.02165	0.03452	0.00164	0.005801
212	14281	FOS	3796	RNA polymerase II core promoter sequence-specific DNA binding	GO:0000979	molecular function	39	4	0.07436	0.02734	0.004329	0.9489	0.006295	0.06981	0.0792	0.02165	0.03452	0.002449	0.007653
213	14281	FOS	3796	DNA-binding transcription factor activity, RNA polymerase II-specific	GO:0000981	molecular function	39	29	0.07436	0.02734	0.008583	0.9203	0.009153	0.06981	0.0792	0.02165	0.03452	0.005674	0.01299
214	14281	FOS	3796	RNA polymerase II cis-regulatory region sequence-specific DNA binding	GO:0000978	molecular function	39	42	0.07436	0.02734	0.01054	0.9078	0.008753	0.06981	0.0792	0.02165	0.03452	0.007788	0.01427
215	14281	FOS	3796	sequence-specific double-stranded DNA binding	GO:1990837	molecular function	39	29	0.07436	0.02734	0.01113	0.9002	0.01705	0.06981	0.0792	0.02165	0.03452	0.007181	0.01726
216	14281	FOS	3796	transcription regulatory region sequence-specific DNA binding	GO:0000976	molecular function	39	19	0.07436	0.02734	0.01145	0.898	0.01485	0.06981	0.0792	0.02165	0.03452	0.007231	0.01814
217	14281	FOS	3796	regulation of transcription by RNA polymerase II	GO:0006357	biological process	39	58	0.07436	0.02734	0.01108	0.8946	0.02314	0.06981	0.0792	0.02165	0.03452	0.005647	0.02173
218	14281	FOS	3796	transcription factor AP-1 complex	GO:0035976	cellular component	39	4	0.07436	0.02782	0.01101	0.9064	0.004316	0.06981	0.0792	0.02265	0.03415	0.009724	0.01246
219	14281	FOS	3796	SMAD protein signal transduction	GO:0060395	biological process	39	5	0.07436	0.0279	0.01005	0.9112	0.008789	0.06981	0.0792	0.02282	0.0341	0.007283	0.01387
220	14281	FOS	3796	DNA-binding transcription factor activity	GO:0003700	molecular function	39	13	0.07436	0.02792	0.01238	0.8845	0.02443	0.06981	0.0792	0.02206	0.03533	0.006253	0.02453
221	14281	FOS	3796	transcription factor binding	GO:0008134	molecular function	39	14	0.07436	0.02862	0.01759	0.856	0.0195	0.06981	0.0792	0.02428	0.03373	0.01224	0.02526
222	14281	FOS	3796	RNA polymerase II activating transcription factor binding	GO:0001102	molecular function	39	4	0.07436	0.02907	0.01416	0.8823	0.007645	0.06981	0.0792	0.02466	0.03427	0.012	0.01671
223	14281	FOS	3796	protein-DNA complex	GO:0032993	cellular component	39	19	0.07436	0.02957	0.01977	0.8407	0.006935	0.06981	0.0792	0.02578	0.03393	0.01748	0.02235
224	14281	FOS	3796	positive regulation of transcription, DNA-templated	GO:0045893	biological process	39	39	0.07436	0.03024	0.02184	0.8276	0.007219	0.06981	0.0792	0.02715	0.03367	0.01911	0.02496
225	14281	FOS	3796	positive regulation of transcription by RNA polymerase II	GO:0045944	biological process	39	64	0.07446	0.02862	0.01822	0.8516	0.02095	0.06971	0.07954	0.02428	0.03373	0.01234	0.0269
226	14281	FOS	3796	nucleus	GO:0005634	cellular component	39	134	0.07451	0.03101	0.02401	0.8155	0.003393	0.07012	0.07917	0.02825	0.03404	0.02256	0.02555
227	14281	FOS	3796	transforming growth factor beta receptor signaling pathway	GO:0007179	biological process	39	9	0.07547	0.0324	0.02774	0.7968	0.01026	0.07088	0.08035	0.02838	0.037	0.02285	0.03368
228	14281	FOS	3796	cellular response to reactive oxygen species	GO:0034614	biological process	39	11	0.07558	0.03113	0.02505	0.81	0.01738	0.06873	0.08311	0.02641	0.03668	0.018	0.03487
229	14281	FOS	3796	nucleoplasm	GO:0005654	cellular component	39	101	0.07712	0.03556	0.03098	0.7829	0.005845	0.07451	0.07982	0.03347	0.03778	0.02781	0.03452
230	14281	FOS	3796	protein binding	GO:0005515	molecular function	39	499	0.08391	0.04129	0.03929	0.7529	0.009937	0.08056	0.08741	0.03594	0.04744	0.03239	0.04767
231	14281	FOS	3796	cellular response to cadmium ion	GO:0071276	biological process	39	3	0.08598	0.04343	0.04273	0.7427	0.007285	0.08188	0.09029	0.03839	0.04913	0.03731	0.04894
232	194908	PLD6	30447	piRNA metabolic process	GO:0034587	biological process	10	4	0.07517	0.05464	0.02498	0.8103	0.014	0.06954	0.08126	0.04212	0.07089	0.01921	0.03248
233	194908	PLD6	30447	protein homodimerization activity	GO:0042803	molecular function	10	26	0.07621	0.05464	0.02461	0.8126	0.01952	0.07158	0.08115	0.04212	0.07089	0.01703	0.03556
234	194908	PLD6	30447	protein binding	GO:0005515	molecular function	10	499	0.07749	0.05464	0.02937	0.7897	0.01851	0.07153	0.08395	0.04212	0.07089	0.02065	0.04176
235	194908	PLD6	30447	mitochondrial outer membrane	GO:0005741	cellular component	10	4	0.08456	0.06046	0.03973	0.7514	0.02219	0.06892	0.1038	0.04416	0.08279	0.02625	0.06013
236	194908	PLD6	30447	positive regulation of mitochondrial fusion	GO:0010636	biological process	10	4	0.08908	0.06433	0.03954	0.7495	0.04929	0.05908	0.1343	0.03635	0.1138	0.01625	0.09623
237	194908	PLD6	30447	cardiolipin hydrolase activity	GO:0035755	molecular function	10	3	0.1289	0.1044	0.08663	0.6411	0.04565	0.08698	0.1909	0.06943	0.157	0.0403	0.1862
238	194908	PLD6	30447	mitochondrial fusion	GO:0008053	biological process	10	4	0.1503	0.124	0.1119	0.5967	0.0634	0.07927	0.2849	0.05665	0.2715	0.04623	0.2709
239	320024	NCEH1	29260	hydrolase activity	GO:0016787	molecular function	2	27	0.1064	0.08674	0.05948	0.691	0.06173	0.06055	0.1871	0.04603	0.1634	0.02125	0.1665
240	320024	NCEH1	29260	membrane	GO:0016020	cellular component	2	80	0.1342	0.1212	0.09806	0.6258	0.02724	0.1032	0.1745	0.07484	0.1963	0.06477	0.1485
241	76467	MSRB2	17061	protein binding	GO:0005515	molecular function	4	499	0.151	0.1751	0.1195	0.5967	0.01412	0.1302	0.1751	0.1383	0.2218	0.0969	0.1473
242	76467	MSRB2	17061	cytoplasm	GO:0005737	cellular component	4	107	0.1741	0.1751	0.1471	0.5618	0.006199	0.1633	0.1855	0.1383	0.2218	0.1351	0.1602
243	76467	MSRB2	17061	peptide-methionine (R)-S-oxide reductase activity	GO:0033743	molecular function	4	2	0.197	0.181	0.1724	0.5319	0.02747	0.1485	0.2613	0.134	0.2446	0.1211	0.2456
244	14739	S1PR2	3169	adenylate cyclase-activating G protein-coupled receptor signaling pathway	GO:0007189	biological process	16	7	0.07436	0.05206	0.00531	0.9436	0.004695	0.06981	0.0792	0.04531	0.0598	0.003691	0.007641
245	14739	S1PR2	3169	positive regulation of peptidyl-threonine phosphorylation	GO:0010800	biological process	16	3	0.07436	0.05965	0.01512	0.8731	0.01425	0.06981	0.0792	0.04473	0.07953	0.01121	0.02039
246	14739	S1PR2	3169	actin cytoskeleton reorganization	GO:0031532	biological process	16	5	0.07436	0.05965	0.02041	0.8364	0.007028	0.06981	0.0792	0.04473	0.07953	0.01792	0.02324
247	14739	S1PR2	3169	sphingosine-1-phosphate receptor signaling pathway	GO:0003376	biological process	16	3	0.0749	0.05965	0.02745	0.7984	0.002905	0.07013	0.07998	0.04473	0.07953	0.02596	0.02902
248	14739	S1PR2	3169	sphingosine-1-phosphate receptor activity	GO:0038036	molecular function	16	2	0.07553	0.05965	0.02665	0.8017	0.01471	0.07074	0.08065	0.04473	0.07953	0.02018	0.03521
249	14739	S1PR2	3169	G protein-coupled receptor activity	GO:0004930	molecular function	16	47	0.07562	0.05965	0.026	0.8053	0.01652	0.07117	0.08035	0.04473	0.07953	0.01912	0.03534
250	14739	S1PR2	3169	filopodium assembly	GO:0046847	biological process	16	3	0.07733	0.0599	0.02745	0.7989	0.0218	0.07158	0.08353	0.0446	0.08044	0.01818	0.04145
251	14739	S1PR2	3169	integrin binding	GO:0005178	molecular function	16	7	0.08177	0.06348	0.03562	0.7656	0.01957	0.07197	0.09289	0.04529	0.08898	0.0246	0.05159
252	14739	S1PR2	3169	G protein-coupled receptor binding	GO:0001664	molecular function	16	48	0.102	0.08978	0.06049	0.6964	0.02015	0.08523	0.122	0.06691	0.1205	0.04254	0.08601
253	14739	S1PR2	3169	plasma membrane	GO:0005886	cellular component	16	87	0.1059	0.09522	0.06567	0.6857	0.01019	0.09987	0.1123	0.07548	0.1201	0.055	0.07841
254	14739	S1PR2	3169	positive regulation of establishment of endothelial barrier	GO:1903142	biological process	16	3	0.1605	0.1506	0.1289	0.5828	0.02373	0.1297	0.1986	0.1161	0.1955	0.09088	0.1828
255	14739	S1PR2	3169	cytoplasm	GO:0005737	cellular component	16	107	0.1652	0.1597	0.1365	0.5749	0.005571	0.1567	0.1742	0.1496	0.1705	0.1264	0.1473
256	14739	S1PR2	3169	protein binding	GO:0005515	molecular function	16	499	0.1721	0.1597	0.1444	0.565	0.005924	0.1624	0.1823	0.1496	0.1705	0.1331	0.1567
257	14739	S1PR2	3169	regulation of metabolic process	GO:0019222	biological process	16	21	0.4897	0.4839	0.4839	0.2962	0.03514	0.376	0.6378	0.3687	0.635	0.3687	0.635
258	56380	ARID3B	14350	regulation of transcription by RNA polymerase II	GO:0006357	biological process	7	58	0.07806	0.04502	0.02769	0.798	0.02905	0.06816	0.08939	0.03505	0.05784	0.01616	0.04745
259	56380	ARID3B	14350	nucleus	GO:0005634	cellular component	7	134	0.08142	0.04502	0.03594	0.7644	0.0163	0.07229	0.0917	0.03505	0.05784	0.02632	0.04907
260	56380	ARID3B	14350	protein binding	GO:0005515	molecular function	7	499	0.08601	0.04502	0.04219	0.7441	0.009691	0.07798	0.09486	0.03505	0.05784	0.03512	0.05068
261	56380	ARID3B	14350	nucleoplasm	GO:0005654	cellular component	7	101	0.08743	0.04502	0.04376	0.7392	0.01457	0.07643	0.1	0.03505	0.05784	0.03311	0.05782
262	56380	ARID3B	14350	DNA binding	GO:0003677	molecular function	7	26	0.08767	0.04502	0.044	0.7386	0.0135	0.07703	0.09977	0.03505	0.05784	0.03402	0.05691
263	333182	COX6B2	24380	mitochondrion	GO:0005739	cellular component	3	44	0.1349	0.296	0.1002	0.6239	0.01816	0.1118	0.1626	0.2274	0.3853	0.07521	0.1334
264	333182	COX6B2	24380	protein binding	GO:0005515	molecular function	3	499	0.266	0.3415	0.2504	0.4617	0.005962	0.2501	0.283	0.3207	0.3636	0.234	0.2679
265	333182	COX6B2	24380	mitochondrial crista	GO:0030061	cellular component	3	2	0.3622	0.3521	0.3521	0.3849	0.01224	0.3244	0.4043	0.3124	0.3968	0.3124	0.3968
266	433693	AKIRIN2	21407	enzyme binding	GO:0019899	molecular function	11	39	0.07436	0.1262	0.01446	0.8769	0.01842	0.06981	0.0792	0.08398	0.1896	0.009935	0.02104
267	433693	AKIRIN2	21407	positive regulation of transcription by RNA polymerase II	GO:0045944	biological process	11	64	0.08661	0.1328	0.04277	0.7419	0.01484	0.07597	0.09875	0.08889	0.1983	0.03227	0.0567
268	433693	AKIRIN2	21407	identical protein binding	GO:0042802	molecular function	11	45	0.1212	0.1328	0.08332	0.6507	0.02544	0.0936	0.1569	0.08889	0.1983	0.05495	0.1263
269	433693	AKIRIN2	21407	positive regulation of innate immune response	GO:0045089	biological process	11	18	0.1224	0.1328	0.08413	0.6499	0.01989	0.1012	0.1479	0.08889	0.1983	0.06087	0.1163
270	433693	AKIRIN2	21407	nucleus	GO:0005634	cellular component	11	134	0.1299	0.1328	0.09418	0.633	0.0207	0.1045	0.1614	0.08889	0.1983	0.06782	0.1308
271	433693	AKIRIN2	21407	protein binding	GO:0005515	molecular function	11	499	0.1428	0.1328	0.1095	0.6096	0.02216	0.114	0.1788	0.08889	0.1983	0.07818	0.1534
272	433693	AKIRIN2	21407	nucleoplasm	GO:0005654	cellular component	11	101	0.1453	0.1328	0.112	0.6062	0.02101	0.1174	0.18	0.08889	0.1983	0.08126	0.1542
273	433693	AKIRIN2	21407	transcription coregulator activity	GO:0003712	molecular function	11	7	0.1478	0.1492	0.1072	0.6027	0.06644	0.07666	0.2851	0.08149	0.2732	0.04062	0.2827
274	433693	AKIRIN2	21407	chromatin	GO:0000785	cellular component	11	19	0.1776	0.1557	0.1497	0.5574	0.02547	0.1368	0.2305	0.1031	0.2352	0.1044	0.2146
275	22256	UNG	12572	damaged DNA binding	GO:0003684	molecular function	9	7	0.07436	0.0681	0.01551	0.8713	0.01149	0.06981	0.0792	0.04227	0.1097	0.01245	0.01934
276	22256	UNG	12572	base-excision repair, AP site formation via deaminated base removal	GO:0097510	biological process	9	2	0.07654	0.0681	0.01946	0.8421	0.03354	0.07163	0.08179	0.04227	0.1097	0.01024	0.03698
277	22256	UNG	12572	ribosomal small subunit binding	GO:0043024	molecular function	9	3	0.09217	0.09087	0.04655	0.7309	0.02638	0.07984	0.1064	0.06599	0.1251	0.02843	0.07623
278	22256	UNG	12572	mitochondrion	GO:0005739	cellular component	9	44	0.1072	0.09868	0.06665	0.6834	0.0153	0.09646	0.1191	0.08406	0.1158	0.05098	0.08715
279	22256	UNG	12572	uracil DNA N-glycosylase activity	GO:0004844	molecular function	9	4	0.1119	0.1035	0.07	0.6738	0.03655	0.07912	0.1582	0.08192	0.1307	0.03814	0.1285
280	22256	UNG	12572	nucleus	GO:0005634	cellular component	9	134	0.1181	0.1041	0.07975	0.6581	0.01526	0.1028	0.1357	0.08538	0.127	0.062	0.1026
281	22256	UNG	12572	protein binding	GO:0005515	molecular function	9	499	0.1669	0.1437	0.1365	0.5734	0.02527	0.129	0.2161	0.1085	0.1903	0.09584	0.1944
282	12345	CAPZB	1491	actin binding	GO:0003779	molecular function	18	5	0.07436	0.04594	0.01141	0.9029	0.006256	0.06981	0.0792	0.0394	0.05356	0.00965	0.01348
283	12345	CAPZB	1491	regulation of lamellipodium assembly	GO:0010591	biological process	18	5	0.07436	0.04594	0.01539	0.8708	0.0141	0.06981	0.0792	0.0394	0.05356	0.01136	0.02086
284	12345	CAPZB	1491	regulation of cell morphogenesis	GO:0022604	biological process	18	11	0.07436	0.04674	0.01607	0.8665	0.01234	0.06981	0.0792	0.04147	0.05268	0.01251	0.02063
285	12345	CAPZB	1491	WASH complex	GO:0071203	cellular component	18	2	0.07528	0.04594	0.01929	0.8416	0.02782	0.07145	0.07932	0.0394	0.05356	0.01117	0.03331
286	12345	CAPZB	1491	cadherin binding	GO:0045296	molecular function	18	12	0.07528	0.04686	0.02619	0.8044	0.009422	0.07145	0.07932	0.04179	0.05255	0.02196	0.03124
287	12345	CAPZB	1491	negative regulation of filopodium assembly	GO:0051490	biological process	18	3	0.07553	0.04686	0.0283	0.7945	0.006133	0.0704	0.08104	0.04179	0.05255	0.02524	0.03173
288	12345	CAPZB	1491	cytoskeleton organization	GO:0007010	biological process	18	13	0.07626	0.04594	0.0179	0.8494	0.03841	0.06815	0.08532	0.0394	0.05356	0.008262	0.03877
289	12345	CAPZB	1491	F-actin capping protein complex	GO:0008290	cellular component	18	3	0.07678	0.04594	0.02351	0.8171	0.03245	0.07228	0.08155	0.0394	0.05356	0.01257	0.04396
290	12345	CAPZB	1491	actin filament binding	GO:0051015	molecular function	18	9	0.07767	0.04713	0.02993	0.7876	0.01897	0.06746	0.08942	0.0418	0.05313	0.02089	0.04288
291	12345	CAPZB	1491	cell morphogenesis	GO:0000902	biological process	18	8	0.08487	0.05404	0.03964	0.7519	0.01635	0.07785	0.09251	0.04755	0.06142	0.02903	0.05413
292	12345	CAPZB	1491	barbed-end actin filament capping	GO:0051016	biological process	18	2	0.08636	0.0536	0.04256	0.7429	0.01553	0.07658	0.09739	0.04266	0.06734	0.03185	0.05687
293	12345	CAPZB	1491	extracellular exosome	GO:0070062	cellular component	18	65	0.117	0.08202	0.07776	0.6616	0.01831	0.1018	0.1343	0.05693	0.1182	0.05687	0.1063
294	12345	CAPZB	1491	protein binding	GO:0005515	molecular function	18	499	0.1246	0.08722	0.08492	0.6473	0.03045	0.09617	0.1615	0.05512	0.138	0.05099	0.1414
295	320162	CEP95	25141	centrosome	GO:0005813	cellular component	4	25	0.1281	0.2088	0.08903	0.6387	0.03736	0.08944	0.1834	0.1698	0.2568	0.04972	0.1594
296	320162	CEP95	25141	protein binding	GO:0005515	molecular function	4	499	0.2009	0.2114	0.1782	0.528	0.003647	0.1944	0.2076	0.1759	0.2542	0.1699	0.187
297	320162	CEP95	25141	spindle pole	GO:0000922	cellular component	4	5	0.231	0.2114	0.2114	0.4952	0.01487	0.1991	0.2681	0.1759	0.2542	0.1759	0.2542
298	69162	SEC31A	17052	COPII vesicle coat	GO:0030127	cellular component	19	2	0.07436	0.07093	0.01312	0.8881	0.01344	0.06981	0.0792	0.04938	0.1019	0.009611	0.01792
299	69162	SEC31A	17052	calcium-dependent protein binding	GO:0048306	molecular function	19	5	0.07436	0.07093	0.01537	0.874	0.004555	0.06981	0.0792	0.04938	0.1019	0.01402	0.01684
300	69162	SEC31A	17052	response to calcium ion	GO:0051592	biological process	19	5	0.07436	0.07093	0.01603	0.8675	0.01077	0.06981	0.0792	0.04938	0.1019	0.01296	0.01982
301	69162	SEC31A	17052	vesicle coat	GO:0030120	cellular component	19	5	0.07578	0.0757	0.02267	0.8226	0.02737	0.07173	0.08006	0.04649	0.1233	0.01354	0.03797
302	69162	SEC31A	17052	COPII-coated ER to Golgi transport vesicle	GO:0030134	cellular component	19	3	0.0776	0.07658	0.02985	0.788	0.01351	0.07292	0.08258	0.0477	0.123	0.02305	0.03867
303	69162	SEC31A	17052	COPII-coated vesicle cargo loading	GO:0090110	biological process	19	3	0.08014	0.07644	0.02901	0.7921	0.02895	0.07164	0.08965	0.04607	0.1268	0.01688	0.04984
304	69162	SEC31A	17052	endoplasmic reticulum organization	GO:0007029	biological process	19	9	0.08533	0.08194	0.03651	0.7615	0.03493	0.06772	0.1075	0.04936	0.136	0.01909	0.06985
305	69162	SEC31A	17052	endoplasmic reticulum exit site	GO:0070971	cellular component	19	3	0.1028	0.1159	0.06206	0.6937	0.006	0.09992	0.1058	0.08986	0.1494	0.05584	0.06897
306	69162	SEC31A	17052	intracellular protein transport	GO:0006886	biological process	19	26	0.1152	0.1193	0.0741	0.6673	0.02965	0.09111	0.1456	0.07825	0.1819	0.04409	0.1246
307	69162	SEC31A	17052	endoplasmic reticulum	GO:0005783	cellular component	19	40	0.1333	0.1405	0.09799	0.628	0.01249	0.1179	0.1507	0.1273	0.1551	0.08067	0.119
308	69162	SEC31A	17052	structural molecule activity	GO:0005198	molecular function	19	24	0.1392	0.1175	0.08046	0.643	0.08021	0.07757	0.2498	0.05498	0.2513	0.02075	0.3119
309	69162	SEC31A	17052	intracellular membrane-bounded organelle	GO:0043231	cellular component	19	55	0.146	0.1406	0.113	0.606	0.009117	0.1359	0.1569	0.1273	0.1553	0.09854	0.1295
310	69162	SEC31A	17052	perinuclear region of cytoplasm	GO:0048471	cellular component	19	15	0.1531	0.1406	0.1214	0.5941	0.01074	0.1396	0.1678	0.1273	0.1553	0.1035	0.1425
311	69162	SEC31A	17052	cytosol	GO:0005829	cellular component	19	84	0.1556	0.1416	0.1245	0.5902	0.007414	0.1461	0.1656	0.1301	0.1542	0.1118	0.1386
312	69162	SEC31A	17052	protein binding	GO:0005515	molecular function	19	499	0.1589	0.1427	0.129	0.5842	0.006599	0.1481	0.1704	0.1329	0.1532	0.1173	0.1419
313	69162	SEC31A	17052	cytoplasm	GO:0005737	cellular component	19	107	0.1688	0.1442	0.1408	0.5694	0.005771	0.1608	0.1773	0.1329	0.1563	0.13	0.1524
314	15936	IER2	28871	cell motility	GO:0048870	biological process	7	15	0.1126	0.1266	0.07366	0.6699	0.006992	0.1045	0.1213	0.1046	0.1534	0.06536	0.08302
315	15936	IER2	28871	cytoplasm	GO:0005737	cellular component	7	107	0.1323	0.1266	0.09556	0.6299	0.02674	0.1032	0.1695	0.1046	0.1534	0.06341	0.144
316	15936	IER2	28871	nucleus	GO:0005634	cellular component	7	134	0.1339	0.1266	0.09838	0.6274	0.01302	0.1197	0.1497	0.1046	0.1534	0.08043	0.1203
317	15936	IER2	28871	protein binding	GO:0005515	molecular function	7	499	0.137	0.1266	0.1013	0.6215	0.02337	0.1107	0.1696	0.1046	0.1534	0.07107	0.1443
318	15936	IER2	28871	positive regulation of transcription by RNA polymerase II	GO:0045944	biological process	7	64	0.1403	0.1352	0.1066	0.6137	0.02229	0.1113	0.1768	0.1128	0.1621	0.07574	0.1501
319	15936	IER2	28871	nucleoplasm	GO:0005654	cellular component	7	101	0.1516	0.1271	0.1196	0.5959	0.01821	0.1289	0.1783	0.1054	0.1533	0.09198	0.1556
320	18260	OCLN	8104	tight junction	GO:0070160	cellular component	22	5	0.07436	0.1835	0.01781	0.855	0.004867	0.06981	0.0792	0.1211	0.2781	0.01638	0.01936
321	18260	OCLN	8104	bicellular tight junction	GO:0005923	cellular component	22	5	0.0751	0.1835	0.02362	0.8175	0.01439	0.07085	0.07961	0.1211	0.2781	0.01803	0.03095
322	18260	OCLN	8104	cell-cell junction	GO:0005911	cellular component	22	19	0.08429	0.1985	0.04008	0.7509	0.006718	0.07976	0.08907	0.1451	0.2716	0.03534	0.04545
323	18260	OCLN	8104	protein domain specific binding	GO:0019904	molecular function	22	82	0.1016	0.2251	0.05352	0.7101	0.04794	0.07111	0.1453	0.1312	0.3864	0.02227	0.1286
324	18260	OCLN	8104	bicellular tight junction assembly	GO:0070830	biological process	22	2	0.1237	0.283	0.08633	0.6465	0.01762	0.1036	0.1477	0.2186	0.3664	0.06469	0.1152
325	18260	OCLN	8104	negative regulation of gene expression	GO:0010629	biological process	22	21	0.132	0.2509	0.08576	0.6372	0.06536	0.07294	0.2388	0.1625	0.3874	0.03057	0.2406
326	18260	OCLN	8104	plasma membrane	GO:0005886	cellular component	22	87	0.1487	0.2924	0.1168	0.6007	0.006892	0.1388	0.1593	0.2338	0.3658	0.1055	0.1294
327	18260	OCLN	8104	negative regulation of protein phosphorylation	GO:0001933	biological process	22	19	0.1756	0.2925	0.1447	0.5618	0.03586	0.1238	0.2492	0.2338	0.3659	0.08915	0.235
328	18260	OCLN	8104	protein binding	GO:0005515	molecular function	22	499	0.178	0.2982	0.1518	0.5562	0.006726	0.165	0.1921	0.2429	0.3659	0.1384	0.1665
329	18260	OCLN	8104	cytoplasmic vesicle	GO:0031410	cellular component	22	32	0.2099	0.3053	0.185	0.5192	0.0274	0.1606	0.2743	0.2519	0.3702	0.1294	0.2644
330	18260	OCLN	8104	cell junction	GO:0030054	cellular component	22	11	0.2122	0.3091	0.19	0.5155	0.01456	0.1838	0.2449	0.2595	0.3682	0.1578	0.2289
331	18260	OCLN	8104	positive regulation of glucose import	GO:0046326	biological process	22	5	0.2678	0.3388	0.2524	0.4594	0.01378	0.2328	0.308	0.3063	0.3747	0.2153	0.296
332	18260	OCLN	8104	positive regulation of blood-brain barrier permeability	GO:1905605	biological process	22	3	0.2811	0.3354	0.2653	0.4477	0.02464	0.2215	0.3568	0.2732	0.4117	0.2021	0.3482
333	18260	OCLN	8104	lysosomal membrane	GO:0005765	cellular component	22	15	0.2946	0.3552	0.2788	0.4365	0.02811	0.223	0.3892	0.2977	0.4239	0.2026	0.3838
334	18260	OCLN	8104	cell-cell junction organization	GO:0045216	biological process	22	9	0.3194	0.3686	0.2979	0.4103	0.06675	0.168	0.607	0.2614	0.5197	0.1407	0.6308
335	18260	OCLN	8104	positive regulation of gene expression	GO:0010628	biological process	22	19	0.3277	0.3628	0.3147	0.4079	0.03595	0.236	0.4551	0.2762	0.4765	0.2201	0.45
336	18260	OCLN	8104	protein-containing complex	GO:0032991	cellular component	22	364	0.3424	0.3764	0.3294	0.3978	0.03299	0.2499	0.4693	0.309	0.4587	0.2327	0.4661
337	18260	OCLN	8104	regulation of glucose transmembrane transport	GO:0010827	biological process	22	5	0.3448	0.3845	0.3339	0.3975	0.009315	0.3154	0.377	0.3583	0.4127	0.3037	0.3673
338	15370	NR4A1	7980	DNA-binding transcription factor activity, RNA polymerase II-specific	GO:0000981	molecular function	25	29	0.07484	0.08727	0.02469	0.8121	0.01412	0.06938	0.08072	0.08008	0.09511	0.01898	0.03212
339	15370	NR4A1	7980	RNA polymerase II cis-regulatory region sequence-specific DNA binding	GO:0000978	molecular function	25	42	0.07642	0.08727	0.02857	0.7934	0.01599	0.06918	0.08442	0.08008	0.09511	0.02109	0.0387
340	15370	NR4A1	7980	transcription regulator complex	GO:0005667	cellular component	25	14	0.07715	0.08727	0.02873	0.7928	0.01469	0.07204	0.08262	0.08008	0.09511	0.02168	0.03808
341	15370	NR4A1	7980	regulation of transcription by RNA polymerase II	GO:0006357	biological process	25	58	0.0794	0.08727	0.03002	0.7871	0.02782	0.0673	0.09367	0.08008	0.09511	0.01776	0.05073
342	15370	NR4A1	7980	sequence-specific double-stranded DNA binding	GO:1990837	molecular function	25	29	0.07961	0.08727	0.03449	0.7694	0.01386	0.06925	0.09152	0.08008	0.09511	0.02649	0.04489
343	15370	NR4A1	7980	endothelial cell chemotaxis	GO:0035767	biological process	25	5	0.08469	0.08727	0.03976	0.7516	0.0166	0.07352	0.09755	0.08008	0.09511	0.02901	0.0545
344	15370	NR4A1	7980	positive regulation of transcription by RNA polymerase II	GO:0045944	biological process	25	64	0.086	0.08727	0.04235	0.7438	0.006058	0.07896	0.09367	0.08008	0.09511	0.03783	0.04741
345	15370	NR4A1	7980	cell migration involved in sprouting angiogenesis	GO:0002042	biological process	25	2	0.08798	0.08727	0.04471	0.7369	0.008457	0.07891	0.0981	0.08008	0.09511	0.03811	0.05245
346	15370	NR4A1	7980	cellular response to vascular endothelial growth factor stimulus	GO:0035924	biological process	25	4	0.08934	0.08727	0.04616	0.7327	0.009848	0.07963	0.1002	0.08008	0.09511	0.03843	0.05544
347	15370	NR4A1	7980	nucleus	GO:0005634	cellular component	25	134	0.0979	0.09072	0.05642	0.7065	0.003576	0.09174	0.1045	0.08284	0.09934	0.05294	0.06014
348	15370	NR4A1	7980	positive regulation of endothelial cell proliferation	GO:0001938	biological process	25	6	0.1112	0.09194	0.07173	0.6736	0.008193	0.1056	0.117	0.08185	0.1033	0.0623	0.08259
349	15370	NR4A1	7980	nucleoplasm	GO:0005654	cellular component	25	101	0.112	0.09525	0.07307	0.671	0.004081	0.105	0.1195	0.08483	0.107	0.06816	0.07834
350	15370	NR4A1	7980	cellular response to fibroblast growth factor stimulus	GO:0044344	biological process	25	5	0.1131	0.09487	0.07398	0.669	0.01457	0.1001	0.1278	0.07949	0.1132	0.05779	0.09472
351	15370	NR4A1	7980	protein binding	GO:0005515	molecular function	25	499	0.1136	0.09525	0.07505	0.6672	0.005648	0.1044	0.1236	0.08483	0.107	0.06816	0.08265
352	15370	NR4A1	7980	cytosol	GO:0005829	cellular component	25	84	0.1182	0.09587	0.08092	0.6564	0.006523	0.1081	0.1292	0.08501	0.1081	0.07261	0.09019
353	15370	NR4A1	7980	glucocorticoid receptor binding	GO:0035259	molecular function	25	4	0.1186	0.09864	0.07984	0.6572	0.02128	0.09778	0.144	0.07661	0.127	0.05643	0.113
354	15370	NR4A1	7980	nuclear membrane	GO:0031965	cellular component	25	11	0.1553	0.1293	0.1236	0.5906	0.01814	0.1325	0.1821	0.1006	0.1662	0.0947	0.1612
355	15370	NR4A1	7980	cellular response to corticotropin-releasing hormone stimulus	GO:0071376	biological process	25	3	0.1794	0.1531	0.1531	0.5548	0.008045	0.1666	0.1933	0.137	0.171	0.137	0.171
356	85305	KARS1	6215	aminoacyl-tRNA synthetase multienzyme complex	GO:0017101	cellular component	38	2	0.07436	0.03959	0.005148	0.9316	0.02298	0.06981	0.0792	0.03858	0.04062	0.001777	0.01491
357	85305	KARS1	6215	identical protein binding	GO:0042802	molecular function	38	45	0.07436	0.03959	0.01228	0.8851	0.02432	0.06981	0.0792	0.03858	0.04062	0.00616	0.02446
358	85305	KARS1	6215	mitochondrion	GO:0005739	cellular component	38	44	0.07436	0.03959	0.0155	0.8722	0.007377	0.06981	0.0792	0.03858	0.04062	0.01324	0.01815
359	85305	KARS1	6215	protein binding	GO:0005515	molecular function	38	499	0.07436	0.03959	0.01712	0.8595	0.01668	0.06981	0.0792	0.03858	0.04062	0.01261	0.02323
360	85305	KARS1	6215	cytosol	GO:0005829	cellular component	38	84	0.07436	0.03959	0.01762	0.8563	0.01293	0.06981	0.0792	0.03858	0.04062	0.01394	0.02226
361	85305	KARS1	6215	plasma membrane	GO:0005886	cellular component	38	87	0.07436	0.03959	0.01754	0.8528	0.02385	0.06981	0.0792	0.03858	0.04062	0.01074	0.02865
362	85305	KARS1	6215	protein homodimerization activity	GO:0042803	molecular function	38	26	0.07436	0.03959	0.01865	0.8475	0.01597	0.06981	0.0792	0.03858	0.04062	0.01385	0.02512
363	85305	KARS1	6215	nucleus	GO:0005634	cellular component	38	134	0.07436	0.04207	0.02277	0.8221	0.008276	0.06981	0.0792	0.0364	0.04863	0.0195	0.02658
364	85305	KARS1	6215	extracellular space	GO:0005615	cellular component	38	29	0.07482	0.03959	0.02039	0.8358	0.02401	0.07051	0.0794	0.03858	0.04062	0.01284	0.03236
365	85305	KARS1	6215	basophil activation involved in immune response	GO:0002276	biological process	38	4	0.07758	0.04441	0.02003	0.8349	0.03729	0.0725	0.08301	0.03456	0.05707	0.009406	0.04265
366	85305	KARS1	6215	tRNA binding	GO:0000049	molecular function	38	5	0.0777	0.04634	0.02981	0.7881	0.01568	0.07434	0.0812	0.03711	0.05787	0.02216	0.04009
367	85305	KARS1	6215	positive regulation of macrophage activation	GO:0043032	biological process	38	4	0.07871	0.04708	0.03279	0.776	0.01014	0.07359	0.08419	0.03794	0.05844	0.02701	0.03981
368	85305	KARS1	6215	positive regulation of transcription, DNA-templated	GO:0045893	biological process	38	39	0.08265	0.05198	0.03806	0.7569	0.01105	0.07633	0.08949	0.0461	0.05863	0.03084	0.04698
369	85305	KARS1	6215	positive regulation of inflammatory response to antigenic stimulus	GO:0002863	biological process	38	6	0.08377	0.0493	0.03692	0.7603	0.02534	0.07144	0.09822	0.03475	0.06994	0.02292	0.05946
370	85305	KARS1	6215	ATP adenylyltransferase activity	GO:0003877	molecular function	38	2	0.09072	0.05592	0.04284	0.7404	0.03941	0.06844	0.1202	0.03488	0.08966	0.02081	0.0882
371	85305	KARS1	6215	ERK1 and ERK2 cascade	GO:0070371	biological process	38	2	0.09307	0.05858	0.04785	0.7267	0.03179	0.07174	0.1207	0.03948	0.08691	0.02649	0.08645
372	85305	KARS1	6215	lysyl-tRNA aminoacylation	GO:0006430	biological process	38	3	0.09508	0.06172	0.05321	0.7139	0.0129	0.08196	0.1103	0.05149	0.07397	0.04216	0.06717
373	85305	KARS1	6215	diadenosine tetraphosphate biosynthetic process	GO:0015966	biological process	38	3	0.09842	0.06293	0.053	0.7125	0.03758	0.07295	0.1328	0.03912	0.1012	0.0265	0.106
374	85305	KARS1	6215	lysine-tRNA ligase activity	GO:0004824	molecular function	38	2	0.1217	0.08468	0.08246	0.6521	0.02578	0.09554	0.1549	0.05734	0.1251	0.0546	0.1245
375	67772	CHD8	20153	positive regulation of transcription by RNA polymerase III	GO:0045945	biological process	27	3	0.07436	0.05344	0.01026	0.9084	0.01262	0.06981	0.0792	0.04461	0.06401	0.006954	0.01515
376	67772	CHD8	20153	methylated histone binding	GO:0035064	molecular function	27	8	0.07436	0.05344	0.0108	0.9074	0.005586	0.06981	0.0792	0.04461	0.06401	0.009048	0.0129
377	67772	CHD8	20153	chromatin binding	GO:0003682	molecular function	27	12	0.07436	0.05344	0.01394	0.88	0.01608	0.06981	0.0792	0.04461	0.06401	0.009277	0.02093
378	67772	CHD8	20153	MLL1 complex	GO:0071339	cellular component	27	3	0.07436	0.05344	0.0143	0.8791	0.01407	0.06981	0.0792	0.04461	0.06401	0.01036	0.01974
379	67772	CHD8	20153	beta-catenin binding	GO:0008013	molecular function	27	5	0.07436	0.05385	0.01763	0.8553	0.01166	0.06981	0.0792	0.0454	0.06387	0.01424	0.02184
380	67772	CHD8	20153	ATP-dependent chromatin remodeling	GO:0043044	biological process	27	3	0.07436	0.05569	0.01821	0.8521	0.01534	0.06981	0.0792	0.04294	0.07222	0.0138	0.02403
381	67772	CHD8	20153	DNA-dependent ATPase activity	GO:0008094	molecular function	27	8	0.07462	0.05626	0.02108	0.831	0.02696	0.06957	0.08004	0.04252	0.07444	0.01249	0.03557
382	67772	CHD8	20153	negative regulation of canonical Wnt signaling pathway	GO:0090090	biological process	27	14	0.0755	0.05686	0.02601	0.8049	0.01347	0.07156	0.07964	0.04498	0.07189	0.02017	0.03355
383	67772	CHD8	20153	negative regulation of transcription, DNA-templated	GO:0045892	biological process	27	42	0.07676	0.05626	0.02487	0.8119	0.02774	0.06772	0.08701	0.04252	0.07444	0.01485	0.04164
384	67772	CHD8	20153	negative regulation of transcription by RNA polymerase II	GO:0000122	biological process	27	48	0.08016	0.05789	0.03549	0.7661	0.009324	0.07346	0.08746	0.04511	0.07429	0.02962	0.04253
385	67772	CHD8	20153	digestive tract development	GO:0048565	biological process	27	5	0.08224	0.05789	0.03715	0.7596	0.02061	0.06744	0.1003	0.04511	0.07429	0.02512	0.05493
386	67772	CHD8	20153	positive regulation of transcription, DNA-templated	GO:0045893	biological process	27	39	0.08283	0.05626	0.03306	0.7754	0.03455	0.06768	0.1014	0.04252	0.07444	0.01734	0.06305
387	67772	CHD8	20153	DNA helicase activity	GO:0003678	molecular function	27	11	0.08289	0.05789	0.03858	0.7551	0.01617	0.06995	0.09822	0.04511	0.07429	0.02832	0.05256
388	67772	CHD8	20153	brain development	GO:0007420	biological process	27	4	0.08328	0.05808	0.03228	0.7772	0.03927	0.06303	0.11	0.04407	0.07654	0.01551	0.06719
389	67772	CHD8	20153	nucleus	GO:0005634	cellular component	27	134	0.08383	0.05859	0.0402	0.7501	0.007338	0.07686	0.09143	0.04611	0.07443	0.035	0.04617
390	67772	CHD8	20153	DNA binding	GO:0003677	molecular function	27	26	0.08692	0.05871	0.04344	0.7405	0.005933	0.08115	0.0931	0.04637	0.07433	0.03891	0.0485
391	67772	CHD8	20153	nucleoplasm	GO:0005654	cellular component	27	101	0.09418	0.06205	0.05207	0.7172	0.005346	0.08696	0.102	0.05091	0.07562	0.04714	0.05751
392	67772	CHD8	20153	positive regulation of transcription by RNA polymerase II	GO:0045944	biological process	27	64	0.09449	0.06111	0.05171	0.7173	0.0205	0.07721	0.1156	0.04829	0.07733	0.03551	0.07531
393	67772	CHD8	20153	protein binding	GO:0005515	molecular function	27	499	0.0965	0.06371	0.05453	0.7105	0.01281	0.08491	0.1097	0.05178	0.0784	0.0431	0.069
394	67772	CHD8	20153	ATP binding	GO:0005524	molecular function	27	13	0.1064	0.07147	0.06519	0.685	0.02927	0.07946	0.1424	0.04545	0.1124	0.03965	0.1072
395	67772	CHD8	20153	protein-containing complex	GO:0032991	cellular component	27	364	0.3229	0.3012	0.3012	0.4091	0.06331	0.1764	0.5913	0.149	0.6087	0.149	0.6087
396	73205	C9orf72	28337	positive regulation of macroautophagy	GO:0016239	biological process	35	12	0.09824	0.339	0.05624	0.7064	0.01647	0.08281	0.1165	0.2417	0.4755	0.04183	0.07561
397	73205	C9orf72	28337	endosome	GO:0005768	cellular component	35	18	0.1037	0.339	0.06101	0.6944	0.02806	0.08378	0.1285	0.2417	0.4755	0.03705	0.1005
398	73205	C9orf72	28337	autophagosome	GO:0005776	cellular component	35	5	0.1268	0.339	0.09014	0.6404	0.01337	0.1128	0.1425	0.2417	0.4755	0.07277	0.1117
399	73205	C9orf72	28337	small GTPase binding	GO:0031267	molecular function	35	5	0.1402	0.339	0.09111	0.6274	0.06728	0.08069	0.2434	0.2417	0.4755	0.02952	0.2812
400	73205	C9orf72	28337	regulation of TORC1 signaling	GO:1903432	biological process	35	4	0.1432	0.339	0.1057	0.6126	0.03592	0.1042	0.1967	0.2417	0.4755	0.05967	0.1871
401	73205	C9orf72	28337	regulation of autophagy	GO:0010506	biological process	35	10	0.1492	0.339	0.1153	0.5987	0.03906	0.1003	0.222	0.2417	0.4755	0.0655	0.2029
402	73205	C9orf72	28337	intracellular membrane-bounded organelle	GO:0043231	cellular component	35	55	0.1492	0.339	0.1151	0.5996	0.03478	0.1051	0.2118	0.2417	0.4755	0.06805	0.1946
403	73205	C9orf72	28337	protein binding	GO:0005515	molecular function	35	499	0.1654	0.339	0.1365	0.5748	0.007257	0.1549	0.1766	0.2417	0.4755	0.1235	0.1508
404	73205	C9orf72	28337	nucleus	GO:0005634	cellular component	35	134	0.1677	0.339	0.139	0.5714	0.01043	0.1536	0.1831	0.2417	0.4755	0.1201	0.1609
405	73205	C9orf72	28337	cytoplasm	GO:0005737	cellular component	35	107	0.1784	0.339	0.1502	0.5571	0.02174	0.1455	0.2187	0.2417	0.4755	0.1111	0.2031
406	73205	C9orf72	28337	cytosol	GO:0005829	cellular component	35	84	0.1865	0.339	0.1604	0.546	0.0188	0.1553	0.2241	0.2417	0.4755	0.1247	0.2063
407	73205	C9orf72	28337	axon extension	GO:0048675	biological process	35	6	0.2146	0.339	0.1934	0.5124	0.01306	0.1874	0.2457	0.2417	0.4755	0.1631	0.2293
408	73205	C9orf72	28337	cytoplasmic stress granule	GO:0010494	cellular component	35	3	0.2232	0.339	0.202	0.5028	0.02446	0.1739	0.2866	0.2417	0.4755	0.1475	0.2765
409	73205	C9orf72	28337	regulation of autophagosome assembly	GO:2000785	biological process	35	5	0.2315	0.3495	0.1991	0.4941	0.06978	0.119	0.4502	0.2395	0.5102	0.086	0.4607
[truncated: 4,564 more rows]

## Sheet: Ash1L_down
	entrez_mouse	hgnc_symbol	hgnc_id	go_name	go_id	go_domain	ncon_gene	ncon_go	global_padj	gene_padj	pval	sim	sem_sim	cilow_global_padj	ciupp_global_padj	cilow_gene_padj	ciupp_gene_padj	cilow_pval	ciupp_pval
[truncated: 2,568 more rows]

[truncated: 2 more sheets: Crebbp_down, Ehmt1_down]
