# Supplementary material for: Identification of a transcriptional signature found in multiple models of ASD and related disorders
Source: HighWire-hosted journal article supplement (doi:10.1101/gr.276591.122), 2022-09-01
Supplement: Supplemental_Table_S6.xlsx [file Supplemental_Table_S6.xlsx]

## Sheet: Legend
Supplemental_Table_S6
All sheets:	Raw GeneWalk (Ietswaart et al., 2021) results for genes up-regulated upon loss of one of the ASD-linked chromatin modifiers reported here

## Sheet: Ash1L_up
	entrez_mouse	hgnc_symbol	hgnc_id	go_name	go_id	go_domain	ncon_gene	ncon_go	global_padj	gene_padj	pval	sim	sem_sim	cilow_global_padj	ciupp_global_padj	cilow_gene_padj	ciupp_gene_padj	cilow_pval	ciupp_pval
0	80297	SPTBN4	14896	PML body	GO:0016605	cellular component	12	2	0.08599	0.03486	0.009461	0.9077	0.01749	0.08287	0.08923	0.02511	0.0484	0.005449	0.01643
1	80297	SPTBN4	14896	membrane	GO:0016020	cellular component	12	35	0.08599	0.03486	0.01121	0.8934	0.01806	0.08287	0.08923	0.02511	0.0484	0.005923	0.0212
2	80297	SPTBN4	14896	ankyrin binding	GO:0030506	molecular function	12	3	0.08604	0.03614	0.01205	0.8737	0.03711	0.08284	0.08936	0.02704	0.04831	0.004557	0.03183
3	80297	SPTBN4	14896	nuclear matrix	GO:0016363	cellular component	12	2	0.08604	0.03614	0.02074	0.8293	0.01775	0.08284	0.08936	0.02704	0.04831	0.01562	0.02754
4	80297	SPTBN4	14896	spectrin	GO:0008091	cellular component	12	2	0.08639	0.03614	0.02267	0.8168	0.02222	0.08258	0.09037	0.02704	0.04831	0.01582	0.03249
5	80297	SPTBN4	14896	extracellular exosome	GO:0070062	cellular component	12	24	0.08657	0.0461	0.03011	0.7751	0.02115	0.08428	0.08892	0.04266	0.04981	0.02132	0.0425
6	80297	SPTBN4	14896	phosphatase binding	GO:0019902	molecular function	12	3	0.09335	0.0411	0.03017	0.775	0.04163	0.07687	0.1134	0.02794	0.06047	0.01505	0.06048
7	80297	SPTBN4	14896	cytoplasm	GO:0005737	cellular component	12	35	0.09866	0.05265	0.04905	0.7055	0.008308	0.089	0.1094	0.04277	0.06481	0.04255	0.05654
8	80297	SPTBN4	14896	protein binding	GO:0005515	molecular function	12	237	0.09904	0.05281	0.04903	0.7052	0.01379	0.08832	0.1111	0.0428	0.06517	0.03875	0.06205
9	26372	CLCN6	2024	intracellular membrane-bounded organelle	GO:0043231	cellular component	4	39	0.08599	0.02614	0.0176	0.8541	0.001184	0.08287	0.08923	0.0244	0.028	0.01732	0.01788
10	26372	CLCN6	2024	lysosomal membrane	GO:0005765	cellular component	4	9	0.08599	0.02614	0.02151	0.8243	0.007127	0.08287	0.08923	0.0244	0.028	0.01933	0.02393
11	26372	CLCN6	2024	chloride transmembrane transporter activity	GO:0015108	molecular function	4	7	0.08599	0.02614	0.02614	0.7944	0.004254	0.08287	0.08923	0.0244	0.028	0.0244	0.028
12	64450	GPR85	4536	plasma membrane	GO:0005886	cellular component	4	52	0.1761	0.2641	0.1308	0.5553	0.006447	0.1625	0.191	0.2293	0.3042	0.1194	0.1433
13	64450	GPR85	4536	endoplasmic reticulum	GO:0005783	cellular component	4	18	0.243	0.2641	0.2001	0.4762	0.03062	0.1843	0.3203	0.2293	0.3042	0.1378	0.2906
14	64450	GPR85	4536	G protein-coupled receptor activity	GO:0004930	molecular function	4	50	0.2582	0.2641	0.2169	0.4611	0.02659	0.1973	0.3379	0.2293	0.3042	0.1567	0.3001
15	64450	GPR85	4536	protein binding	GO:0005515	molecular function	4	237	0.2648	0.2641	0.2252	0.455	0.005518	0.2563	0.2736	0.2293	0.3042	0.211	0.2405
16	26938	ST6GALNAC5	19342	alpha-N-acetylgalactosaminide alpha-2,6-sialyltransferase activity	GO:0001665	molecular function	5	2	0.2807	0.4982	0.2368	0.4352	0.06231	0.1631	0.4829	0.4407	0.5631	0.1204	0.4656
17	26938	ST6GALNAC5	19342	ganglioside biosynthetic process	GO:0001574	biological process	5	5	0.4332	0.5125	0.4103	0.3196	0.007836	0.4024	0.4664	0.458	0.5735	0.3813	0.4415
18	26938	ST6GALNAC5	19342	oligosaccharide metabolic process	GO:0009311	biological process	5	18	0.5298	0.5125	0.5125	0.2577	0.01391	0.4816	0.5829	0.458	0.5735	0.458	0.5735
19	76982	VXN	28498	neuron differentiation	GO:0030182	biological process	2	17	0.3226	0.406	0.2833	0.4005	0.04996	0.2122	0.4904	0.3269	0.5042	0.1692	0.4743
20	76982	VXN	28498	protein binding	GO:0005515	molecular function	2	237	0.4109	0.4419	0.3834	0.3322	0.03853	0.3007	0.5615	0.3279	0.5957	0.2701	0.5443
21	50771	ATP9B	13541	endocytosis	GO:0006897	biological process	8	11	0.08693	0.09929	0.03142	0.7683	0.01523	0.08215	0.09198	0.0604	0.1632	0.02436	0.04052
22	50771	ATP9B	13541	endosome	GO:0005768	cellular component	8	12	0.09328	0.09929	0.03717	0.745	0.02468	0.08327	0.1045	0.0604	0.1632	0.02443	0.05654
23	50771	ATP9B	13541	ATPase-coupled intramembrane lipid transporter activity	GO:0140326	molecular function	8	7	0.09633	0.09929	0.04123	0.7293	0.03038	0.07635	0.1215	0.0604	0.1632	0.02468	0.0689
24	50771	ATP9B	13541	retrograde vesicle-mediated transport, Golgi to endoplasmic reticulum	GO:0006890	biological process	8	3	0.1054	0.09929	0.05562	0.6862	0.02958	0.07907	0.1404	0.0604	0.1632	0.0343	0.09017
25	50771	ATP9B	13541	trans-Golgi network	GO:0005802	cellular component	8	4	0.1263	0.09929	0.07684	0.6376	0.03904	0.08587	0.1858	0.0604	0.1632	0.04181	0.1412
26	50771	ATP9B	13541	plasma membrane	GO:0005886	cellular component	8	52	0.1347	0.09929	0.08593	0.6203	0.03629	0.09333	0.1943	0.0604	0.1632	0.04915	0.1502
27	50771	ATP9B	13541	phospholipid translocation	GO:0045332	biological process	8	8	0.1384	0.1122	0.09195	0.611	0.02686	0.1042	0.1837	0.07645	0.1648	0.06086	0.1389
28	50771	ATP9B	13541	perinuclear region of cytoplasm	GO:0048471	cellular component	8	5	0.16	0.1144	0.1144	0.5756	0.02917	0.1168	0.2192	0.07519	0.174	0.07519	0.174
29	54667	ATP8B2	13534	integral component of plasma membrane	GO:0005887	cellular component	8	31	0.09021	0.09799	0.03569	0.7502	0.01354	0.0809	0.1006	0.06677	0.1438	0.02833	0.04497
30	54667	ATP8B2	13534	ATPase-coupled intramembrane lipid transporter activity	GO:0140326	molecular function	8	7	0.09277	0.09799	0.03662	0.7465	0.02675	0.07733	0.1113	0.06677	0.1438	0.02327	0.05761
31	54667	ATP8B2	13534	Golgi organization	GO:0007030	biological process	8	7	0.1088	0.09799	0.05749	0.6816	0.02906	0.08561	0.1383	0.06677	0.1438	0.03535	0.09349
32	54667	ATP8B2	13534	trans-Golgi network	GO:0005802	cellular component	8	4	0.1228	0.09799	0.07349	0.6444	0.03814	0.08415	0.1791	0.06677	0.1438	0.04043	0.1336
33	54667	ATP8B2	13534	phosphatidylcholine flippase activity	GO:0140345	molecular function	8	3	0.1278	0.09799	0.07829	0.635	0.03662	0.08917	0.1832	0.06677	0.1438	0.04407	0.1391
34	54667	ATP8B2	13534	Golgi apparatus	GO:0005794	cellular component	8	12	0.1297	0.09799	0.08228	0.6274	0.03523	0.08906	0.1888	0.06677	0.1438	0.04814	0.1406
35	54667	ATP8B2	13534	phospholipid translocation	GO:0045332	biological process	8	8	0.1335	0.1059	0.08714	0.6196	0.02571	0.1021	0.1746	0.07938	0.1413	0.05832	0.1302
36	54667	ATP8B2	13534	plasma membrane	GO:0005886	cellular component	8	52	0.1401	0.102	0.09216	0.6103	0.03038	0.1029	0.1909	0.07009	0.1486	0.05747	0.1478
37	22629	YWHAH	12853	sodium channel regulator activity	GO:0017080	molecular function	26	4	0.08599	0.03514	0.008218	0.9056	0.02287	0.08287	0.08923	0.02876	0.04293	0.002687	0.02514
38	22629	YWHAH	12853	enzyme binding	GO:0019899	molecular function	26	34	0.08599	0.03514	0.009618	0.9017	0.01912	0.08287	0.08923	0.02876	0.04293	0.004247	0.02178
39	22629	YWHAH	12853	ion channel binding	GO:0044325	molecular function	26	4	0.08599	0.03514	0.01171	0.8882	0.01996	0.08287	0.08923	0.02876	0.04293	0.006014	0.0228
40	22629	YWHAH	12853	glucocorticoid catabolic process	GO:0006713	biological process	26	3	0.08599	0.03514	0.01261	0.8868	0.01702	0.08287	0.08923	0.02876	0.04293	0.008214	0.01935
41	22629	YWHAH	12853	identical protein binding	GO:0042802	molecular function	26	14	0.08599	0.03514	0.01736	0.8498	0.02805	0.08287	0.08923	0.02876	0.04293	0.01038	0.02905
42	22629	YWHAH	12853	protein binding	GO:0005515	molecular function	26	237	0.08599	0.03514	0.01954	0.8375	0.021	0.08287	0.08923	0.02876	0.04293	0.01386	0.02754
43	22629	YWHAH	12853	plasma membrane	GO:0005886	cellular component	26	52	0.08599	0.03538	0.02095	0.8279	0.01525	0.08287	0.08923	0.02934	0.04265	0.01641	0.02675
44	22629	YWHAH	12853	glucocorticoid receptor signaling pathway	GO:0042921	biological process	26	2	0.08599	0.0355	0.02147	0.8238	0.01587	0.08287	0.08923	0.02877	0.04381	0.01667	0.02767
45	22629	YWHAH	12853	protein heterodimerization activity	GO:0046982	molecular function	26	3	0.08599	0.0355	0.02235	0.8185	0.01817	0.08287	0.08923	0.02877	0.04381	0.01671	0.0299
46	22629	YWHAH	12853	regulation of sodium ion transmembrane transporter activity	GO:2000649	biological process	26	11	0.08654	0.03691	0.0257	0.7977	0.01495	0.08246	0.09082	0.02915	0.04675	0.02009	0.03287
47	22629	YWHAH	12853	regulation of sodium ion transport	GO:0002028	biological process	26	5	0.08668	0.03666	0.02411	0.8053	0.03325	0.08236	0.09122	0.02858	0.04703	0.01368	0.0425
48	22629	YWHAH	12853	membrane depolarization during action potential	GO:0086010	biological process	26	4	0.08691	0.03666	0.02295	0.8113	0.03462	0.08217	0.09192	0.02858	0.04703	0.01253	0.04205
49	22629	YWHAH	12853	extracellular exosome	GO:0070062	cellular component	26	24	0.08909	0.04469	0.03395	0.7577	0.02092	0.08392	0.09459	0.03494	0.05716	0.02376	0.04852
50	22629	YWHAH	12853	substantia nigra development	GO:0021762	biological process	26	2	0.09587	0.05031	0.04421	0.7199	0.01893	0.08431	0.109	0.03631	0.06971	0.03211	0.06088
51	22629	YWHAH	12853	glucocorticoid receptor binding	GO:0035259	molecular function	26	4	0.1062	0.05858	0.05611	0.6854	0.02548	0.08593	0.1312	0.03926	0.0874	0.03659	0.08605
52	22629	YWHAH	12853	positive regulation of transcription, DNA-templated	GO:0045893	biological process	26	28	0.118	0.07239	0.07142	0.6507	0.01009	0.1033	0.1349	0.06134	0.08543	0.06079	0.08392
53	381677	VGF	12684	intracellular membrane-bounded organelle	GO:0043231	cellular component	9	39	0.08616	0.0455	0.02382	0.8072	0.03201	0.0833	0.08912	0.02965	0.06981	0.01378	0.04117
54	381677	VGF	12684	cytoplasmic vesicle	GO:0031410	cellular component	9	33	0.08659	0.04191	0.01711	0.8503	0.03766	0.08243	0.09096	0.02604	0.06743	0.00877	0.03337
55	381677	VGF	12684	Golgi apparatus	GO:0005794	cellular component	9	12	0.09068	0.04496	0.02968	0.7773	0.02781	0.07902	0.1041	0.02875	0.07032	0.0185	0.04761
56	381677	VGF	12684	hormone activity	GO:0005179	molecular function	9	16	0.09078	0.04191	0.02285	0.8116	0.04806	0.07894	0.1044	0.02604	0.06743	0.009767	0.05345
57	381677	VGF	12684	response to cAMP	GO:0051591	biological process	9	6	0.09362	0.05184	0.03286	0.7624	0.04172	0.07902	0.1109	0.03103	0.08659	0.01633	0.06614
58	381677	VGF	12684	extracellular space	GO:0005615	cellular component	9	17	0.09432	0.04293	0.02558	0.7979	0.05428	0.07612	0.1169	0.02546	0.0724	0.01018	0.06424
59	381677	VGF	12684	regulation of synaptic plasticity	GO:0048167	biological process	9	15	0.09491	0.05021	0.04033	0.7331	0.02395	0.08346	0.1079	0.03091	0.08158	0.02684	0.06061
60	381677	VGF	12684	carbohydrate homeostasis	GO:0033500	biological process	9	4	0.1047	0.05317	0.04173	0.7269	0.06208	0.06891	0.1589	0.02498	0.1132	0.01524	0.1143
61	18218	DUSP8	3074	peptidyl-threonine dephosphorylation	GO:0035970	biological process	10	2	0.08599	0.03049	0.00529	0.9357	0.01281	0.08287	0.08923	0.02106	0.04415	0.002112	0.01325
62	18218	DUSP8	3074	mitogen-activated protein kinase binding	GO:0051019	molecular function	10	3	0.08599	0.03049	0.008414	0.9187	0.01012	0.08287	0.08923	0.02106	0.04415	0.005644	0.01254
63	18218	DUSP8	3074	peptidyl-tyrosine dephosphorylation	GO:0035335	biological process	10	5	0.08599	0.03049	0.008618	0.9183	0.008428	0.08287	0.08923	0.02106	0.04415	0.006038	0.0123
64	18218	DUSP8	3074	protein tyrosine/threonine phosphatase activity	GO:0008330	molecular function	10	2	0.08599	0.03498	0.01641	0.863	0.007999	0.08287	0.08923	0.03159	0.03872	0.01429	0.01884
65	18218	DUSP8	3074	MAP kinase tyrosine/serine/threonine phosphatase activity	GO:0017017	molecular function	10	3	0.08599	0.03526	0.01689	0.8585	0.01048	0.08287	0.08923	0.03153	0.03944	0.01393	0.02048
66	18218	DUSP8	3074	protein dephosphorylation	GO:0006470	biological process	10	12	0.08599	0.03655	0.02309	0.8132	0.004351	0.08287	0.08923	0.0349	0.03828	0.02159	0.02469
67	18218	DUSP8	3074	phosphoprotein phosphatase activity	GO:0004721	molecular function	10	20	0.08956	0.04354	0.0316	0.7677	0.02029	0.07995	0.1003	0.03389	0.05594	0.02241	0.04455
68	18218	DUSP8	3074	inactivation of MAPK activity	GO:0000188	biological process	10	7	0.09512	0.0575	0.04437	0.7196	0.009114	0.09071	0.09974	0.05136	0.06439	0.0379	0.05194
69	18218	DUSP8	3074	cytosol	GO:0005829	cellular component	10	32	0.1495	0.1126	0.1036	0.5932	0.01285	0.1281	0.1745	0.09428	0.1344	0.08506	0.1261
70	18218	DUSP8	3074	cytoplasm	GO:0005737	cellular component	10	35	0.1788	0.1332	0.1332	0.5502	0.02909	0.1324	0.2414	0.08933	0.1987	0.08933	0.1987
71	106583	SCAF8	20959	RNA polymerase II complex binding	GO:0000993	molecular function	15	6	0.08599	0.1236	0.02129	0.8261	0.006243	0.08287	0.08923	0.1125	0.1359	0.01936	0.02341
72	106583	SCAF8	20959	RNA polymerase core enzyme binding	GO:0043175	molecular function	15	8	0.08667	0.1236	0.02822	0.7837	0.01474	0.08451	0.08889	0.1125	0.1359	0.02203	0.03615
73	106583	SCAF8	20959	RNA binding	GO:0003723	molecular function	15	43	0.0869	0.1236	0.03376	0.758	0.006699	0.08382	0.09009	0.1125	0.1359	0.0302	0.03774
74	106583	SCAF8	20959	mRNA binding	GO:0003729	molecular function	15	12	0.09149	0.1236	0.04017	0.7337	0.01242	0.08622	0.09709	0.1125	0.1359	0.03237	0.04985
75	106583	SCAF8	20959	nucleus	GO:0005634	cellular component	15	48	0.1024	0.1277	0.05358	0.6929	0.001503	0.09836	0.1065	0.1234	0.1321	0.05234	0.05486
76	106583	SCAF8	20959	positive regulation of DNA-templated transcription, elongation	GO:0032786	biological process	15	6	0.104	0.1236	0.0536	0.6923	0.01802	0.09473	0.1141	0.1125	0.1359	0.03956	0.07264
77	106583	SCAF8	20959	RNA polymerase II C-terminal domain phosphoserine binding	GO:1990269	molecular function	15	3	0.1229	0.1349	0.0767	0.6399	0.01191	0.1066	0.1416	0.1278	0.1424	0.06364	0.09243
78	106583	SCAF8	20959	nucleoplasm	GO:0005654	cellular component	15	26	0.1361	0.1445	0.08933	0.6165	0.01264	0.1211	0.1529	0.1241	0.1683	0.0734	0.1087
79	106583	SCAF8	20959	protein binding	GO:0005515	molecular function	15	237	0.1455	0.1433	0.09939	0.5997	0.01608	0.1207	0.1753	0.1351	0.152	0.07764	0.1272
80	106583	SCAF8	20959	mRNA polyadenylation	GO:0006378	biological process	15	4	0.1544	0.1593	0.105	0.5876	0.04149	0.1047	0.2278	0.1136	0.2234	0.05797	0.1903
81	106583	SCAF8	20959	cytoplasm	GO:0005737	cellular component	15	35	0.1751	0.1661	0.1297	0.5564	0.01219	0.1553	0.1973	0.1439	0.1918	0.1091	0.1541
82	106583	SCAF8	20959	negative regulation of termination of RNA polymerase II transcription, poly(A)-coupled	GO:2000805	biological process	15	3	0.1886	0.1729	0.1439	0.5388	0.01101	0.1712	0.2077	0.1428	0.2092	0.1234	0.1679
83	106583	SCAF8	20959	mRNA cleavage factor complex	GO:0005849	cellular component	15	4	0.3055	0.2809	0.2664	0.4165	0.03879	0.2165	0.4311	0.1829	0.4314	0.1698	0.4182
84	106583	SCAF8	20959	termination of RNA polymerase II transcription	GO:0006369	biological process	15	4	0.3274	0.2912	0.2912	0.3982	0.03199	0.2487	0.431	0.2035	0.4168	0.2035	0.4168
85	207777	TSPOAP1	16831	protein binding	GO:0005515	molecular function	8	237	0.08599	0.03272	0.02347	0.8109	0.005503	0.08287	0.08923	0.02519	0.04251	0.02156	0.02554
86	207777	TSPOAP1	16831	mitochondrion	GO:0005739	cellular component	8	12	0.0863	0.03272	0.02433	0.8059	0.01299	0.08265	0.09012	0.02519	0.04251	0.01974	0.02999
87	207777	TSPOAP1	16831	cytoplasm	GO:0005737	cellular component	8	35	0.08646	0.0328	0.02878	0.7808	0.009681	0.08275	0.09033	0.02528	0.04256	0.02448	0.03382
88	207777	TSPOAP1	16831	benzodiazepine receptor binding	GO:0030156	molecular function	8	2	0.09068	0.03416	0.02403	0.8019	0.04719	0.07902	0.1041	0.02422	0.04818	0.01013	0.05704
89	67996	SRSF6	10788	alternative mRNA splicing, via spliceosome	GO:0000380	biological process	16	3	0.09194	0.1746	0.03497	0.753	0.02601	0.07799	0.1084	0.1087	0.2803	0.02249	0.05439
90	67996	SRSF6	10788	pre-mRNA binding	GO:0036002	molecular function	16	7	0.097	0.1746	0.04498	0.7176	0.01993	0.08124	0.1158	0.1087	0.2803	0.03212	0.06299
91	67996	SRSF6	10788	mRNA splicing, via spliceosome	GO:0000398	biological process	16	6	0.1034	0.1746	0.05368	0.6923	0.01704	0.08814	0.1213	0.1087	0.2803	0.04022	0.07164
92	67996	SRSF6	10788	RNA binding	GO:0003723	molecular function	16	43	0.1152	0.1746	0.0647	0.6628	0.04122	0.07741	0.1715	0.1087	0.2803	0.03351	0.1249
93	67996	SRSF6	10788	regulation of keratinocyte proliferation	GO:0010837	biological process	16	4	0.1344	0.1746	0.087	0.6204	0.02007	0.1083	0.1668	0.1087	0.2803	0.0634	0.1194
94	67996	SRSF6	10788	negative regulation of mRNA splicing, via spliceosome	GO:0048025	biological process	16	5	0.1415	0.1746	0.0937	0.6071	0.0353	0.09742	0.2055	0.1087	0.2803	0.05539	0.1585
95	67996	SRSF6	10788	regulation of wound healing	GO:0061041	biological process	16	7	0.1458	0.1746	0.09575	0.6008	0.05057	0.08709	0.244	0.1087	0.2803	0.04578	0.2003
96	67996	SRSF6	10788	mRNA binding	GO:0003729	molecular function	16	12	0.1474	0.1812	0.1017	0.5962	0.01112	0.1287	0.1689	0.1195	0.2746	0.08594	0.1204
97	67996	SRSF6	10788	negative regulation of cell death	GO:0060548	biological process	16	7	0.1531	0.201	0.09765	0.5872	0.08789	0.06557	0.3576	0.09657	0.4182	0.0294	0.3243
98	67996	SRSF6	10788	regulation of alternative mRNA splicing, via spliceosome	GO:0000381	biological process	16	2	0.1735	0.1848	0.1279	0.5574	0.02568	0.1314	0.2291	0.1255	0.2722	0.08957	0.1827
99	67996	SRSF6	10788	nuclear speck	GO:0016607	cellular component	16	6	0.1855	0.2168	0.1374	0.5408	0.05057	0.1104	0.3117	0.118	0.3982	0.06763	0.2791
100	67996	SRSF6	10788	mRNA splice site selection	GO:0006376	biological process	16	4	0.2846	0.292	0.2449	0.4365	0.02663	0.2241	0.3615	0.2593	0.3289	0.1781	0.3366
101	67996	SRSF6	10788	positive regulation of epithelial cell proliferation involved in lung morphogenesis	GO:0060501	biological process	16	4	0.3023	0.3023	0.2634	0.4172	0.04661	0.1942	0.4706	0.1845	0.4952	0.1534	0.4522
102	67996	SRSF6	10788	protein binding	GO:0005515	molecular function	16	237	0.3052	0.3073	0.2658	0.4139	0.0523	0.1893	0.4923	0.1807	0.5228	0.1499	0.4713
103	67996	SRSF6	10788	negative regulation of keratinocyte differentiation	GO:0045617	biological process	16	4	0.3895	0.365	0.3607	0.3479	0.03665	0.2841	0.5339	0.2609	0.5108	0.253	0.5141
104	53860	SEPTIN9	7323	non-motile cilium	GO:0097730	cellular component	18	5	0.2322	0.7223	0.188	0.4844	0.04958	0.1442	0.3739	0.6862	0.7603	0.1032	0.3425
105	53860	SEPTIN9	7323	microtubule cytoskeleton	GO:0015630	cellular component	18	3	0.2429	0.7223	0.2005	0.476	0.02774	0.1823	0.3236	0.6862	0.7603	0.1408	0.2856
106	53860	SEPTIN9	7323	actin cytoskeleton	GO:0015629	cellular component	18	6	0.2989	0.7223	0.2614	0.4212	0.03528	0.2128	0.4199	0.6862	0.7603	0.175	0.3903
107	53860	SEPTIN9	7323	perinuclear region of cytoplasm	GO:0048471	cellular component	18	5	0.3022	0.7223	0.2663	0.4192	0.02247	0.2428	0.376	0.6862	0.7603	0.2064	0.3435
108	53860	SEPTIN9	7323	protein binding	GO:0005515	molecular function	18	237	0.331	0.7223	0.2973	0.3953	0.02296	0.267	0.4105	0.6862	0.7603	0.2327	0.3798
109	53860	SEPTIN9	7323	microtubule	GO:0005874	cellular component	18	10	0.3807	0.7455	0.3501	0.3533	0.04401	0.2611	0.5552	0.6808	0.8162	0.2278	0.5383
110	53860	SEPTIN9	7323	cadherin binding	GO:0045296	molecular function	18	6	0.3989	0.7223	0.3733	0.3433	0.002698	0.3865	0.4116	0.6862	0.7603	0.3636	0.3834
111	53860	SEPTIN9	7323	axoneme	GO:0005930	cellular component	18	2	0.4049	0.7223	0.3797	0.3386	0.01362	0.3582	0.4577	0.6862	0.7603	0.3325	0.4337
112	53860	SEPTIN9	7323	cell division site	GO:0032153	cellular component	18	2	0.4088	0.7223	0.3839	0.3358	0.01569	0.3552	0.4705	0.6862	0.7603	0.3295	0.4473
113	53860	SEPTIN9	7323	septin complex	GO:0031105	cellular component	18	4	0.4429	0.7485	0.4177	0.3112	0.03449	0.3374	0.5815	0.6824	0.821	0.3058	0.5707
114	53860	SEPTIN9	7323	molecular adaptor activity	GO:0060090	molecular function	18	4	0.5456	0.8025	0.526	0.2369	0.06016	0.3624	0.8214	0.6494	0.9917	0.3363	0.8228
115	53860	SEPTIN9	7323	septin ring	GO:0005940	cellular component	18	9	0.5728	0.807	0.5567	0.2287	0.0351	0.4533	0.7238	0.702	0.9278	0.434	0.7142
116	53860	SEPTIN9	7323	stress fiber	GO:0001725	cellular component	18	3	0.6353	0.807	0.6245	0.1898	0.0341	0.5157	0.7826	0.702	0.9278	0.5024	0.7764
117	53860	SEPTIN9	7323	cytoskeleton-dependent cytokinesis	GO:0061640	biological process	18	4	0.7804	0.9344	0.7733	0.1035	0.0305	0.6805	0.8949	0.8784	0.9938	0.6706	0.8917
118	53860	SEPTIN9	7323	cellular protein localization	GO:0034613	biological process	18	23	0.8671	0.9344	0.8639	0.04162	0.02966	0.7887	0.9533	0.8784	0.9938	0.784	0.952
119	53860	SEPTIN9	7323	GTPase activity	GO:0003924	molecular function	18	3	0.8701	0.9344	0.8671	0.04626	0.009476	0.8408	0.9004	0.8784	0.9938	0.8381	0.8971
120	53860	SEPTIN9	7323	positive regulation of non-motile cilium assembly	GO:1902857	biological process	18	3	0.9655	0.9652	0.9652	-0.06531	0.02902	0.9354	0.9966	0.9346	0.9967	0.9346	0.9967
121	19417	RASGRF1	9875	response to endoplasmic reticulum stress	GO:0034976	biological process	2	12	0.0876	0.07008	0.03504	0.7527	0.009341	0.08334	0.09209	0.05985	0.08206	0.02992	0.04103
122	19417	RASGRF1	9875	guanyl-nucleotide exchange factor activity	GO:0005085	molecular function	2	3	0.2082	0.1643	0.1643	0.5139	0.02449	0.1627	0.2665	0.1188	0.2272	0.1188	0.2272
123	14168	FGF13	3670	sodium channel regulator activity	GO:0017080	molecular function	12	4	0.08599	0.03623	0.009036	0.9072	0.01843	0.08287	0.08923	0.03016	0.04353	0.004125	0.01979
124	14168	FGF13	3670	protein binding	GO:0005515	molecular function	12	237	0.08599	0.03623	0.02036	0.8324	0.008778	0.08287	0.08923	0.03016	0.04353	0.01765	0.02349
125	14168	FGF13	3670	cytosol	GO:0005829	cellular component	12	32	0.08599	0.03623	0.02083	0.8284	0.01219	0.08287	0.08923	0.03016	0.04353	0.01716	0.0253
126	14168	FGF13	3670	nucleus	GO:0005634	cellular component	12	48	0.08599	0.03623	0.02164	0.8217	0.02338	0.08287	0.08923	0.03016	0.04353	0.01466	0.03193
127	14168	FGF13	3670	cytoplasm	GO:0005737	cellular component	12	35	0.08599	0.03623	0.02421	0.8061	0.006229	0.08287	0.08923	0.03016	0.04353	0.02196	0.02669
128	14168	FGF13	3670	protein kinase activator activity	GO:0030295	molecular function	12	6	0.08599	0.03792	0.02276	0.8116	0.03568	0.08287	0.08923	0.03051	0.04714	0.01207	0.04292
129	14168	FGF13	3670	regulation of voltage-gated sodium channel activity	GO:1905150	biological process	12	5	0.09341	0.04383	0.04009	0.7341	0.02197	0.08853	0.09855	0.03077	0.06243	0.02751	0.05842
130	14168	FGF13	3670	MAPK cascade	GO:0000165	biological process	12	10	0.09766	0.04845	0.04634	0.7128	0.02275	0.08396	0.1136	0.03377	0.0695	0.0316	0.06796
131	93843	PNCK	13415	peptidyl-serine phosphorylation	GO:0018105	biological process	4	7	0.08599	0.03148	0.01727	0.8532	0.01805	0.08287	0.08923	0.02242	0.04419	0.01215	0.02454
132	93843	PNCK	13415	calmodulin-dependent protein kinase activity	GO:0004683	molecular function	4	5	0.08606	0.03148	0.02331	0.8119	0.02089	0.08305	0.08918	0.02242	0.04419	0.01663	0.03266
133	93843	PNCK	13415	calmodulin binding	GO:0005516	molecular function	4	3	0.08731	0.03148	0.0286	0.782	0.0182	0.08562	0.08904	0.02242	0.04419	0.02116	0.03865
134	93843	PNCK	13415	intracellular anatomical structure	GO:0005622	cellular component	4	11	0.08816	0.03301	0.02817	0.7839	0.03987	0.08554	0.09086	0.02232	0.04882	0.01439	0.05513
135	223455	MARCHF6	30550	proteasome-mediated ubiquitin-dependent protein catabolic process	GO:0043161	biological process	18	14	0.08599	0.04016	0.008066	0.9113	0.01877	0.08287	0.08923	0.03618	0.04457	0.003051	0.02133
136	223455	MARCHF6	30550	ubiquitin conjugating enzyme binding	GO:0031624	molecular function	18	2	0.08599	0.04016	0.01413	0.8775	0.01455	0.08287	0.08923	0.03618	0.04457	0.009895	0.02018
137	223455	MARCHF6	30550	ubiquitin-specific protease binding	GO:1990381	molecular function	18	2	0.08599	0.04016	0.01528	0.8694	0.01433	0.08287	0.08923	0.03618	0.04457	0.0113	0.02065
138	223455	MARCHF6	30550	ubiquitin-dependent ERAD pathway	GO:0030433	biological process	18	5	0.08599	0.04016	0.0167	0.8612	0.007161	0.08287	0.08923	0.03618	0.04457	0.01483	0.01881
139	223455	MARCHF6	30550	membrane	GO:0016020	cellular component	18	35	0.08599	0.04016	0.01714	0.8555	0.0171	0.08287	0.08923	0.03618	0.04457	0.01283	0.02291
140	223455	MARCHF6	30550	integral component of membrane	GO:0016021	cellular component	18	18	0.08599	0.04016	0.01752	0.8545	0.003987	0.08287	0.08923	0.03618	0.04457	0.01643	0.01868
141	223455	MARCHF6	30550	enzyme binding	GO:0019899	molecular function	18	34	0.08599	0.04105	0.01952	0.8385	0.01422	0.08287	0.08923	0.0383	0.04399	0.01561	0.02442
142	223455	MARCHF6	30550	integral component of endoplasmic reticulum membrane	GO:0030176	cellular component	18	6	0.08599	0.04194	0.02305	0.8135	0.01097	0.08287	0.08923	0.03657	0.0481	0.01941	0.02737
143	223455	MARCHF6	30550	proteasomal protein catabolic process	GO:0010498	biological process	18	6	0.08599	0.04194	0.02418	0.8064	0.01987	0.08287	0.08923	0.03657	0.0481	0.0176	0.03323
144	223455	MARCHF6	30550	ubiquitin protein ligase activity	GO:0061630	molecular function	18	7	0.08668	0.04426	0.03142	0.7684	0.01008	0.08236	0.09122	0.03864	0.0507	0.02652	0.03723
145	223455	MARCHF6	30550	protein K48-linked ubiquitination	GO:0070936	biological process	18	2	0.08959	0.04539	0.03833	0.7398	0.004127	0.08532	0.09407	0.03976	0.05182	0.0357	0.04116
146	223455	MARCHF6	30550	protein binding	GO:0005515	molecular function	18	237	0.08985	0.04702	0.03802	0.7412	0.01093	0.08675	0.09307	0.03841	0.05754	0.03153	0.04584
147	223455	MARCHF6	30550	endoplasmic reticulum	GO:0005783	cellular component	18	18	0.09422	0.0505	0.03897	0.7376	0.03318	0.0799	0.1111	0.03534	0.07217	0.02231	0.06807
148	223455	MARCHF6	30550	ubiquitin-protein transferase activity	GO:0004842	molecular function	18	8	0.09852	0.05098	0.04712	0.7106	0.02628	0.08455	0.1148	0.03594	0.0723	0.03035	0.07317
149	223455	MARCHF6	30550	protein ubiquitination	GO:0016567	biological process	18	10	0.1083	0.06186	0.0603	0.6757	0.006429	0.1011	0.1161	0.05308	0.0721	0.05421	0.06707
150	217335	FBF1	24674	centriole	GO:0005814	cellular component	13	4	0.08599	0.08217	0.01597	0.8652	0.01159	0.08287	0.08923	0.07747	0.08716	0.01275	0.02001
151	217335	FBF1	24674	apical junction assembly	GO:0043297	biological process	13	2	0.09107	0.08217	0.03161	0.768	0.02994	0.08379	0.09897	0.07747	0.08716	0.0191	0.05232
152	217335	FBF1	24674	establishment of epithelial cell polarity	GO:0090162	biological process	13	4	0.09437	0.08217	0.04233	0.7267	0.01811	0.09017	0.09876	0.07747	0.08716	0.03097	0.05787
153	217335	FBF1	24674	spindle pole	GO:0000922	cellular component	13	4	0.09646	0.08217	0.04495	0.7177	0.01885	0.09024	0.1031	0.07747	0.08716	0.0326	0.062
154	217335	FBF1	24674	ciliary basal body	GO:0036064	cellular component	13	11	0.1003	0.0838	0.04739	0.7101	0.02486	0.08434	0.1192	0.08201	0.08563	0.03113	0.07216
155	217335	FBF1	24674	centrosome	GO:0005813	cellular component	13	9	0.1036	0.09014	0.04441	0.7184	0.04927	0.07529	0.1426	0.07968	0.102	0.01973	0.09994
156	217335	FBF1	24674	cilium assembly	GO:0060271	biological process	13	9	0.1043	0.0838	0.05483	0.6894	0.01311	0.08942	0.1216	0.08201	0.08563	0.04412	0.06814
157	217335	FBF1	24674	ciliary transition fiber	GO:0097539	cellular component	13	2	0.1086	0.08578	0.05908	0.6785	0.01771	0.09983	0.1181	0.07713	0.09539	0.04398	0.07937
158	217335	FBF1	24674	keratin filament	GO:0045095	cellular component	13	2	0.1145	0.08632	0.06412	0.6658	0.02424	0.09948	0.1318	0.07738	0.09629	0.04295	0.09573
159	217335	FBF1	24674	apical junction complex	GO:0043296	cellular component	13	2	0.1218	0.09125	0.07173	0.6495	0.0252	0.102	0.1454	0.07472	0.1114	0.04795	0.1073
160	217335	FBF1	24674	protein binding	GO:0005515	molecular function	13	237	0.1845	0.1392	0.1392	0.5448	0.002158	0.177	0.1923	0.1351	0.1434	0.1351	0.1434
161	217692	SIPA1L1	20284	activation of GTPase activity	GO:0090630	biological process	7	3	0.08599	0.03375	0.01374	0.8843	0.005909	0.08287	0.08923	0.03212	0.03547	0.01199	0.01574
162	217692	SIPA1L1	20284	GTPase activator activity	GO:0005096	molecular function	7	7	0.08599	0.03375	0.01643	0.8624	0.0122	0.08287	0.08923	0.03212	0.03547	0.01324	0.0204
163	217692	SIPA1L1	20284	plasma membrane	GO:0005886	cellular component	7	52	0.08599	0.03375	0.02108	0.8272	0.005334	0.08287	0.08923	0.03212	0.03547	0.01937	0.02293
164	217692	SIPA1L1	20284	actin cytoskeleton	GO:0015629	cellular component	7	6	0.08604	0.03514	0.03079	0.771	0.008969	0.08284	0.08936	0.03439	0.03589	0.02643	0.03587
165	217692	SIPA1L1	20284	cytoplasm	GO:0005737	cellular component	7	35	0.09319	0.04086	0.03793	0.7415	0.02529	0.07866	0.1104	0.02937	0.05685	0.02472	0.05821
166	24001	TIAM2	11806	synapse	GO:0045202	cellular component	6	20	0.08599	0.06308	0.01714	0.857	0.01217	0.08287	0.08923	0.0334	0.1191	0.01389	0.02115
167	24001	TIAM2	11806	small GTPase mediated signal transduction	GO:0007264	biological process	6	3	0.09494	0.06308	0.03325	0.7613	0.04663	0.08102	0.1112	0.0334	0.1191	0.01533	0.07209
168	24001	TIAM2	11806	membrane	GO:0016020	cellular component	6	35	0.1017	0.06409	0.04191	0.7277	0.04203	0.08358	0.1238	0.03341	0.1229	0.02085	0.08421
169	24001	TIAM2	11806	activation of GTPase activity	GO:0090630	biological process	6	3	0.1024	0.06308	0.04114	0.731	0.05005	0.0839	0.1249	0.0334	0.1191	0.01795	0.09426
170	24001	TIAM2	11806	extracellular exosome	GO:0070062	cellular component	6	24	0.1029	0.06354	0.04799	0.7078	0.033	0.08248	0.1283	0.03412	0.1183	0.02751	0.0837
171	24001	TIAM2	11806	positive regulation of axonogenesis	GO:0050772	biological process	6	6	0.1699	0.1235	0.1235	0.56	0.04479	0.1067	0.2704	0.06687	0.2281	0.06687	0.2281
172	22393	WFS1	12762	response to endoplasmic reticulum stress	GO:0034976	biological process	26	12	0.09244	0.2183	0.04153	0.7291	0.009885	0.08197	0.1042	0.1596	0.2985	0.03494	0.04936
173	22393	WFS1	12762	endoplasmic reticulum unfolded protein response	GO:0030968	biological process	26	6	0.09267	0.2183	0.0411	0.7301	0.01684	0.07929	0.1083	0.1596	0.2985	0.03086	0.05473
174	22393	WFS1	12762	ubiquitin-dependent ERAD pathway	GO:0030433	biological process	26	5	0.1169	0.2183	0.06855	0.6564	0.02327	0.09271	0.1474	0.1596	0.2985	0.04722	0.09951
175	22393	WFS1	12762	visual perception	GO:0007601	biological process	26	3	0.1233	0.2183	0.07523	0.6426	0.01277	0.1156	0.1315	0.1596	0.2985	0.0614	0.09218
176	22393	WFS1	12762	negative regulation of programmed cell death	GO:0043069	biological process	26	12	0.1279	0.2183	0.08139	0.6303	0.02091	0.103	0.1589	0.1596	0.2985	0.05827	0.1137
177	22393	WFS1	12762	negative regulation of transcription by RNA polymerase II	GO:0000122	biological process	26	29	0.1309	0.2222	0.07359	0.637	0.07326	0.06608	0.2593	0.1572	0.3141	0.02455	0.2206
178	22393	WFS1	12762	calcium ion homeostasis	GO:0055074	biological process	26	4	0.1377	0.2183	0.09138	0.6121	0.026	0.1042	0.1819	0.1596	0.2985	0.06137	0.136
179	22393	WFS1	12762	endoplasmic reticulum calcium ion homeostasis	GO:0032469	biological process	26	5	0.1437	0.2183	0.09804	0.6021	0.01164	0.1268	0.1628	0.1596	0.2985	0.08188	0.1174
180	22393	WFS1	12762	ubiquitin protein ligase binding	GO:0031625	molecular function	26	6	0.1455	0.2183	0.09828	0.5996	0.03325	0.1018	0.2079	0.1596	0.2985	0.0602	0.1605
181	22393	WFS1	12762	negative regulation of neuron apoptotic process	GO:0043524	biological process	26	10	0.1576	0.2183	0.1123	0.5805	0.008679	0.1422	0.1748	0.1596	0.2985	0.09888	0.1275
182	22393	WFS1	12762	integral component of endoplasmic reticulum membrane	GO:0030176	cellular component	26	6	0.1586	0.2215	0.1118	0.5809	0.01299	0.1425	0.1765	0.1656	0.2964	0.0921	0.1357
183	22393	WFS1	12762	negative regulation of type B pancreatic cell apoptotic process	GO:2000675	biological process	26	3	0.1636	0.2183	0.1181	0.5719	0.01477	0.1386	0.1932	0.1596	0.2985	0.09538	0.1462
184	22393	WFS1	12762	sensory perception of sound	GO:0007605	biological process	26	5	0.1653	0.2183	0.1198	0.5697	0.01107	0.1472	0.1857	0.1596	0.2985	0.1019	0.1409
185	22393	WFS1	12762	kidney development	GO:0001822	biological process	26	6	0.1706	0.2211	0.1256	0.5608	0.02447	0.1325	0.2196	0.1622	0.3015	0.08796	0.1793
186	22393	WFS1	12762	ATPase binding	GO:0051117	molecular function	26	2	0.175	0.2222	0.1288	0.5527	0.04588	0.109	0.281	0.1572	0.3141	0.06935	0.2393
187	22393	WFS1	12762	glucose homeostasis	GO:0042593	biological process	26	3	0.1763	0.2255	0.1308	0.5547	0.01765	0.1445	0.2149	0.1727	0.2944	0.102	0.1677
188	22393	WFS1	12762	nervous system process	GO:0050877	biological process	26	18	0.1807	0.2251	0.1331	0.5467	0.04935	0.1095	0.2984	0.1599	0.3169	0.06558	0.27
189	22393	WFS1	12762	protein binding	GO:0005515	molecular function	26	237	0.2433	0.2614	0.2001	0.4728	0.0479	0.1536	0.3854	0.18	0.3797	0.1132	0.3536
190	22393	WFS1	12762	renal water homeostasis	GO:0003091	biological process	26	3	0.2455	0.2507	0.2051	0.4731	0.0157	0.2094	0.2878	0.2033	0.3091	0.1692	0.2485
191	22393	WFS1	12762	positive regulation of protein ubiquitination	GO:0031398	biological process	26	9	0.2575	0.2712	0.2165	0.4624	0.01595	0.2201	0.3013	0.2243	0.3279	0.179	0.262
192	22393	WFS1	12762	negative regulation of DNA-binding transcription factor activity	GO:0043433	biological process	26	6	0.2737	0.2847	0.2336	0.445	0.03359	0.1966	0.3811	0.2085	0.3887	0.1561	0.3497
193	22393	WFS1	12762	positive regulation of protein metabolic process	GO:0051247	biological process	26	17	0.2809	0.2852	0.2425	0.4382	0.02745	0.2196	0.3594	0.2262	0.3596	0.176	0.3341
194	22393	WFS1	12762	negative regulation of ATF6-mediated unfolded protein response	GO:1903892	biological process	26	3	0.3108	0.2997	0.2745	0.4098	0.04048	0.2113	0.457	0.212	0.4236	0.1737	0.4337
195	22393	WFS1	12762	positive regulation of calcium ion transport	GO:0051928	biological process	26	7	0.3124	0.3154	0.2773	0.4108	0.01968	0.2613	0.3735	0.26	0.3825	0.2228	0.3452
196	22393	WFS1	12762	protein stabilization	GO:0050821	biological process	26	3	0.4316	0.4088	0.4035	0.3141	0.05644	0.281	0.6629	0.2557	0.6535	0.2481	0.6561
197	237213	GLRA2	4327	synaptic transmission, glycinergic	GO:0060012	biological process	21	2	0.08599	0.01378	0.001382	0.9676	0.006648	0.08287	0.08923	0.007495	0.02534	0.0003791	0.005038
198	237213	GLRA2	4327	glycine-gated chloride ion channel activity	GO:0022852	molecular function	21	4	0.08599	0.01773	0.002043	0.9644	0.003911	0.08287	0.08923	0.01545	0.02035	0.001268	0.00329
199	237213	GLRA2	4327	extracellularly glycine-gated chloride channel activity	GO:0016934	molecular function	21	5	0.08599	0.01773	0.002496	0.9612	0.001448	0.08287	0.08923	0.01545	0.02035	0.002134	0.00292
200	237213	GLRA2	4327	cellular response to zinc ion	GO:0071294	biological process	21	3	0.08599	0.0303	0.008225	0.9089	0.02447	0.08287	0.08923	0.01957	0.04692	0.003567	0.01896
201	237213	GLRA2	4327	cellular response to amino acid stimulus	GO:0071230	biological process	21	23	0.08599	0.03644	0.01133	0.8976	0.01431	0.08287	0.08923	0.03249	0.04086	0.007495	0.01713
202	237213	GLRA2	4327	response to amino acid	GO:0043200	biological process	21	23	0.08599	0.03818	0.01335	0.8828	0.01755	0.08287	0.08923	0.0317	0.046	0.009249	0.01927
203	237213	GLRA2	4327	chloride channel activity	GO:0005254	molecular function	21	13	0.08599	0.04088	0.0182	0.8476	0.01813	0.08287	0.08923	0.03258	0.05129	0.01348	0.02457
204	237213	GLRA2	4327	cellular response to ethanol	GO:0071361	biological process	21	3	0.08599	0.04244	0.0226	0.8165	0.00308	0.08287	0.08923	0.03251	0.0554	0.02158	0.02366
205	237213	GLRA2	4327	neuropeptide signaling pathway	GO:0007218	biological process	21	6	0.08612	0.04299	0.02792	0.7851	0.006016	0.08319	0.08915	0.03377	0.05474	0.02524	0.03089
206	237213	GLRA2	4327	chloride transmembrane transport	GO:1902476	biological process	21	3	0.08631	0.0322	0.01101	0.8661	0.04643	0.08367	0.08904	0.01609	0.06445	0.002645	0.04581
207	237213	GLRA2	4327	neuron projection	GO:0043005	cellular component	21	27	0.08638	0.04244	0.02798	0.7848	0.01003	0.08259	0.09033	0.03251	0.0554	0.02367	0.03307
208	237213	GLRA2	4327	nervous system process	GO:0050877	biological process	21	18	0.08717	0.04244	0.01937	0.8349	0.03755	0.08195	0.09273	0.03251	0.0554	0.009951	0.03769
209	237213	GLRA2	4327	ion transmembrane transport	GO:0034220	biological process	21	9	0.08725	0.04244	0.02522	0.8003	0.03013	0.08189	0.09297	0.03251	0.0554	0.01538	0.04136
210	237213	GLRA2	4327	integral component of plasma membrane	GO:0005887	cellular component	21	31	0.08947	0.04487	0.03552	0.7506	0.008751	0.08377	0.09557	0.03593	0.05603	0.03064	0.04118
211	237213	GLRA2	4327	chemical synaptic transmission	GO:0007268	biological process	21	18	0.0905	0.04344	0.03247	0.7643	0.02548	0.08448	0.09696	0.03265	0.0578	0.02137	0.04935
212	237213	GLRA2	4327	synapse	GO:0045202	cellular component	21	20	0.09078	0.04398	0.02954	0.7783	0.03593	0.07894	0.1044	0.03207	0.06032	0.01625	0.05367
213	237213	GLRA2	4327	glycine binding	GO:0016594	molecular function	21	4	0.09215	0.04936	0.03736	0.7436	0.02427	0.08301	0.1023	0.0347	0.07021	0.02473	0.05645
214	237213	GLRA2	4327	neurotransmitter receptor activity	GO:0030594	molecular function	21	9	0.105	0.05709	0.05226	0.6949	0.03312	0.08127	0.1356	0.03378	0.09651	0.03033	0.09007
215	237213	GLRA2	4327	regulation of membrane potential	GO:0042391	biological process	21	24	0.1175	0.07492	0.07111	0.6511	0.01476	0.09882	0.1398	0.05963	0.09413	0.05624	0.08991
216	237213	GLRA2	4327	signal transduction	GO:0007165	biological process	21	46	0.1389	0.08171	0.07424	0.6394	0.06801	0.08607	0.2243	0.03284	0.2033	0.02476	0.2226
217	93723	PCDHGA11	8698	integral component of plasma membrane	GO:0005887	cellular component	2	31	0.124	0.1502	0.0751	0.6425	0.02226	0.1058	0.1454	0.1051	0.2148	0.05253	0.1074
218	93723	PCDHGA11	8698	cell adhesion	GO:0007155	biological process	2	13	0.3071	0.2692	0.2692	0.4143	0.03867	0.2179	0.4326	0.1721	0.4211	0.1721	0.4211
219	94178	MCOLN1	13356	membrane	GO:0016020	cellular component	20	35	0.08599	0.01633	0.003249	0.9526	0.008246	0.08287	0.08923	0.01011	0.02638	0.001506	0.007006
220	94178	MCOLN1	13356	late endosome	GO:0005770	cellular component	20	4	0.08599	0.01757	0.003873	0.9419	0.01757	0.08287	0.08923	0.01092	0.02827	0.001268	0.01183
221	94178	MCOLN1	13356	ligand-gated calcium channel activity	GO:0099604	molecular function	20	5	0.08599	0.01791	0.004521	0.9427	0.009975	0.08287	0.08923	0.01073	0.02988	0.001994	0.01025
222	94178	MCOLN1	13356	lysosomal membrane	GO:0005765	cellular component	20	9	0.08599	0.01801	0.004642	0.9367	0.01573	0.08287	0.08923	0.01297	0.025	0.001388	0.01552
223	94178	MCOLN1	13356	intracellular membrane-bounded organelle	GO:0043231	cellular component	20	39	0.08599	0.01801	0.006856	0.9249	0.01449	0.08287	0.08923	0.01297	0.025	0.003307	0.01421
224	94178	MCOLN1	13356	lysosome	GO:0005764	cellular component	20	8	0.08599	0.01825	0.004744	0.9415	0.009815	0.08287	0.08923	0.01438	0.02315	0.00246	0.009147
225	94178	MCOLN1	13356	NAADP-sensitive calcium-release channel activity	GO:0072345	molecular function	20	2	0.08599	0.01845	0.006926	0.9138	0.02221	0.08287	0.08923	0.0108	0.03151	0.001907	0.02516
226	94178	MCOLN1	13356	integral component of membrane	GO:0016021	cellular component	20	18	0.08599	0.01962	0.007443	0.9255	0.007509	0.08287	0.08923	0.01401	0.02747	0.004947	0.0112
227	94178	MCOLN1	13356	protein homotetramerization	GO:0051289	biological process	20	4	0.08599	0.02082	0.01008	0.8984	0.02289	0.08287	0.08923	0.0136	0.03187	0.004933	0.02059
228	94178	MCOLN1	13356	calcium ion transmembrane transport	GO:0070588	biological process	20	12	0.08599	0.02158	0.01257	0.8931	0.004419	0.08287	0.08923	0.01834	0.0254	0.01127	0.01403
229	94178	MCOLN1	13356	Golgi apparatus	GO:0005794	cellular component	20	12	0.08599	0.0288	0.02213	0.8198	0.01432	0.08287	0.08923	0.02286	0.03628	0.01761	0.02782
230	94178	MCOLN1	13356	phagosome maturation	GO:0090382	biological process	20	3	0.08599	0.03051	0.02339	0.8115	0.01671	0.08287	0.08923	0.02297	0.04053	0.01784	0.03069
231	94178	MCOLN1	13356	plasma membrane	GO:0005886	cellular component	20	52	0.08599	0.03062	0.02397	0.8076	0.01767	0.08287	0.08923	0.02299	0.04078	0.01805	0.03182
232	94178	MCOLN1	13356	nucleoplasm	GO:0005654	cellular component	20	26	0.09014	0.03936	0.03524	0.7524	0.02253	0.08574	0.09477	0.02774	0.05585	0.02402	0.05171
233	94178	MCOLN1	13356	receptor complex	GO:0043235	cellular component	20	20	0.09244	0.04253	0.04056	0.7324	0.01624	0.08791	0.09719	0.03123	0.05791	0.03073	0.05353
234	94178	MCOLN1	13356	protein binding	GO:0005515	molecular function	20	237	0.09653	0.04469	0.04373	0.7215	0.0245	0.08888	0.1048	0.0307	0.06505	0.02882	0.06637
235	208439	KLHL29	29404	protein binding	GO:0005515	molecular function	1	237	0.2391	0.1986	0.1986	0.4796	0.009936	0.2126	0.2689	0.1754	0.2249	0.1754	0.2249
236	236511	AGO1	3262	polysome	GO:0005844	cellular component	25	2	0.08599	0.07839	0.009309	0.9156	0.004571	0.08287	0.08923	0.06376	0.09638	0.007673	0.01129
237	236511	AGO1	3262	double-stranded RNA binding	GO:0003725	molecular function	25	5	0.08599	0.07839	0.01853	0.8467	0.006519	0.08287	0.08923	0.06376	0.09638	0.01663	0.02064
238	236511	AGO1	3262	single-stranded RNA binding	GO:0003727	molecular function	25	7	0.08599	0.07839	0.02087	0.8283	0.008138	0.08287	0.08923	0.06376	0.09638	0.0183	0.0238
239	236511	AGO1	3262	core promoter sequence-specific DNA binding	GO:0001046	molecular function	25	5	0.08604	0.07839	0.01593	0.8582	0.03215	0.08284	0.08936	0.06376	0.09638	0.00869	0.02918
240	236511	AGO1	3262	production of miRNAs involved in gene silencing by miRNA	GO:0035196	biological process	25	2	0.08668	0.07839	0.02577	0.7969	0.03277	0.08236	0.09122	0.06376	0.09638	0.01489	0.04461
241	236511	AGO1	3262	RNA binding	GO:0003723	molecular function	25	43	0.08668	0.07839	0.02833	0.7831	0.01142	0.08236	0.09122	0.06376	0.09638	0.02337	0.03435
242	236511	AGO1	3262	RNA polymerase II complex binding	GO:0000993	molecular function	25	6	0.08902	0.07839	0.03031	0.7747	0.02811	0.08249	0.09606	0.06376	0.09638	0.01889	0.04865
243	236511	AGO1	3262	negative regulation of angiogenesis	GO:0016525	biological process	25	6	0.08967	0.07839	0.02738	0.789	0.02975	0.07986	0.1007	0.06376	0.09638	0.0167	0.04489
244	236511	AGO1	3262	RNA secondary structure unwinding	GO:0010501	biological process	25	2	0.09185	0.07872	0.03765	0.7429	0.01543	0.08112	0.104	0.06445	0.09616	0.02886	0.04912
245	236511	AGO1	3262	cytoplasmic ribonucleoprotein granule	GO:0036464	cellular component	25	12	0.09426	0.07839	0.03438	0.7568	0.04478	0.0794	0.1119	0.06376	0.09638	0.01639	0.07211
246	236511	AGO1	3262	miRNA binding	GO:0035198	molecular function	25	2	0.09709	0.07872	0.04662	0.7122	0.01739	0.08128	0.116	0.06445	0.09616	0.0347	0.06263
247	236511	AGO1	3262	RISC-loading complex	GO:0070578	cellular component	25	2	0.09833	0.08005	0.04919	0.705	0.01134	0.08905	0.1086	0.06715	0.09544	0.0406	0.05959
248	236511	AGO1	3262	RISC complex	GO:0016442	cellular component	25	2	0.0987	0.07926	0.0486	0.7066	0.01169	0.08879	0.1097	0.065	0.09665	0.03979	0.05935
249	236511	AGO1	3262	miRNA mediated inhibition of translation	GO:0035278	biological process	25	2	0.1006	0.08389	0.05016	0.7019	0.02204	0.08904	0.1137	0.0686	0.1026	0.03468	0.07255
250	236511	AGO1	3262	nuclear-transcribed mRNA catabolic process	GO:0000956	biological process	25	14	0.1016	0.07885	0.04919	0.7042	0.03194	0.07718	0.1337	0.06436	0.09662	0.02894	0.08362
251	236511	AGO1	3262	positive regulation of transcription by RNA polymerase II	GO:0045944	biological process	25	43	0.1042	0.07921	0.05468	0.6897	0.01707	0.08652	0.1254	0.06546	0.09586	0.04123	0.07251
252	236511	AGO1	3262	pre-miRNA processing	GO:0031054	biological process	25	2	0.108	0.07976	0.05935	0.6781	0.01318	0.09247	0.1262	0.06605	0.09631	0.04782	0.07365
253	236511	AGO1	3262	ribonucleoprotein complex	GO:1990904	cellular component	25	24	0.1257	0.09611	0.07856	0.6364	0.004176	0.1239	0.1276	0.09429	0.09797	0.0736	0.08384
254	236511	AGO1	3262	miRNA loading onto RISC involved in gene silencing by miRNA	GO:0035280	biological process	25	2	0.1276	0.08884	0.07983	0.6332	0.02516	0.1005	0.162	0.06865	0.115	0.05334	0.1195
255	236511	AGO1	3262	cytosol	GO:0005829	cellular component	25	32	0.1443	0.1059	0.09721	0.6034	0.01036	0.1337	0.1558	0.09365	0.1197	0.08276	0.1142
256	236511	AGO1	3262	protein binding	GO:0005515	molecular function	25	237	0.1579	0.1164	0.1112	0.5814	0.01883	0.1298	0.192	0.08829	0.1535	0.0846	0.1463
257	236511	AGO1	3262	cytoplasm	GO:0005737	cellular component	25	35	0.1646	0.1186	0.1182	0.5712	0.02225	0.1313	0.2063	0.08674	0.1622	0.08607	0.1623
258	171171	NTNG2	14288	intercellular bridge	GO:0045171	cellular component	13	4	0.08599	0.09283	0.02256	0.8171	0.008252	0.08287	0.08923	0.07199	0.1197	0.01988	0.02562
259	171171	NTNG2	14288	Flemming body	GO:0090543	cellular component	13	2	0.08599	0.09283	0.02279	0.8152	0.005154	0.08287	0.08923	0.07199	0.1197	0.02108	0.02464
260	171171	NTNG2	14288	basement membrane assembly	GO:0070831	biological process	13	4	0.09023	0.09283	0.03183	0.7678	0.02986	0.07939	0.1025	0.07199	0.1197	0.01948	0.05203
261	171171	NTNG2	14288	substrate adhesion-dependent cell spreading	GO:0034446	biological process	13	5	0.1071	0.1153	0.05802	0.6815	0.01239	0.1034	0.111	0.09449	0.1407	0.04731	0.07115
262	171171	NTNG2	14288	cell migration	GO:0016477	biological process	13	38	0.1083	0.1153	0.05761	0.6813	0.02618	0.09051	0.1296	0.09449	0.1407	0.03748	0.08853
263	171171	NTNG2	14288	plasma membrane	GO:0005886	cellular component	13	52	0.1134	0.1222	0.06404	0.6664	0.02066	0.09375	0.1371	0.1088	0.1372	0.0457	0.08974
264	171171	NTNG2	14288	protein binding	GO:0005515	molecular function	13	237	0.1532	0.1492	0.1073	0.5873	0.01727	0.1255	0.1871	0.1244	0.1791	0.08259	0.1394
265	171171	NTNG2	14288	animal organ morphogenesis	GO:0009887	biological process	13	30	0.207	0.1945	0.161	0.5159	0.03486	0.1501	0.2856	0.1414	0.2674	0.1003	0.2583
266	171171	NTNG2	14288	tissue development	GO:0009888	biological process	13	30	0.2493	0.2321	0.208	0.4698	0.02128	0.2	0.3108	0.1976	0.2725	0.1595	0.2712
267	171171	NTNG2	14288	laminin complex	GO:0043256	cellular component	13	18	0.2626	0.2386	0.2215	0.4557	0.03411	0.191	0.3609	0.1805	0.3152	0.145	0.3383
268	108073	GRM7	4599	group III metabotropic glutamate receptor activity	GO:0001642	molecular function	18	2	0.08599	0.03396	0.00386	0.9496	0.00519	0.08287	0.08923	0.02229	0.05173	0.002433	0.006124
269	108073	GRM7	4599	G protein-coupled glutamate receptor signaling pathway	GO:0007216	biological process	18	5	0.08599	0.03396	0.0117	0.8952	0.01368	0.08287	0.08923	0.02229	0.05173	0.007758	0.01764
270	108073	GRM7	4599	adenylate cyclase-inhibiting G protein-coupled glutamate receptor signaling pathway	GO:0007196	biological process	18	3	0.08599	0.0342	0.0123	0.8898	0.0147	0.08287	0.08923	0.02246	0.05207	0.007888	0.01919
271	108073	GRM7	4599	adenylate cyclase inhibiting G protein-coupled glutamate receptor activity	GO:0001640	molecular function	18	4	0.08599	0.0357	0.01403	0.8661	0.02869	0.08287	0.08923	0.02326	0.05479	0.006742	0.02921
272	108073	GRM7	4599	integral component of membrane	GO:0016021	cellular component	18	18	0.08599	0.03571	0.0139	0.8792	0.01744	0.08287	0.08923	0.02538	0.05025	0.009742	0.01984
273	108073	GRM7	4599	regulation of synaptic transmission, glutamatergic	GO:0051966	biological process	18	5	0.08599	0.03721	0.01554	0.8667	0.01482	0.08287	0.08923	0.02796	0.04953	0.01137	0.02123
274	108073	GRM7	4599	cell cortex	GO:0005938	cellular component	18	3	0.08638	0.0362	0.01458	0.8523	0.03945	0.08259	0.09033	0.02196	0.05967	0.005327	0.03989
275	108073	GRM7	4599	integral component of plasma membrane	GO:0005887	cellular component	18	31	0.08651	0.0405	0.02574	0.7976	0.0173	0.08416	0.08894	0.03079	0.05327	0.01941	0.03414
276	108073	GRM7	4599	dendrite	GO:0030425	cellular component	18	13	0.08668	0.04231	0.02441	0.8034	0.03449	0.08236	0.09122	0.03084	0.05803	0.01348	0.04419
277	108073	GRM7	4599	adenylate cyclase inhibitor activity	GO:0010855	molecular function	18	2	0.08923	0.04045	0.02188	0.8197	0.03985	0.08022	0.09924	0.02583	0.06333	0.01108	0.0432
278	108073	GRM7	4599	glutamate receptor activity	GO:0008066	molecular function	18	4	0.09329	0.045	0.03076	0.7719	0.04447	0.08389	0.1037	0.02964	0.06833	0.01449	0.06533
279	108073	GRM7	4599	sensory perception of sound	GO:0007605	biological process	18	5	0.09453	0.04839	0.03868	0.7386	0.02885	0.07671	0.1165	0.0328	0.07138	0.02372	0.0631
280	108073	GRM7	4599	chemical synaptic transmission	GO:0007268	biological process	18	18	0.09596	0.05057	0.04515	0.7174	0.01373	0.08503	0.1083	0.03824	0.06687	0.03566	0.05717
281	108073	GRM7	4599	serine binding	GO:0070905	molecular function	18	4	0.09619	0.04908	0.04469	0.718	0.02356	0.07673	0.1206	0.0338	0.07127	0.03003	0.06651
282	108073	GRM7	4599	receptor complex	GO:0043235	cellular component	18	20	0.1097	0.06325	0.05837	0.6789	0.03652	0.08129	0.148	0.04005	0.09988	0.03187	0.1069
283	56710	BRINP1	2687	negative regulation of mitotic cell cycle	GO:0045930	biological process	11	10	0.1177	0.2921	0.06896	0.6545	0.03124	0.08759	0.1581	0.1803	0.4731	0.04139	0.1149
284	56710	BRINP1	2687	dendrite	GO:0030425	cellular component	11	13	0.1281	0.2921	0.0732	0.6382	0.07026	0.06472	0.2534	0.1803	0.4731	0.02568	0.2087
285	56710	BRINP1	2687	negative regulation of cell cycle	GO:0045786	biological process	11	9	0.1578	0.2921	0.1096	0.5789	0.0513	0.09334	0.2668	0.1803	0.4731	0.05246	0.2288
286	56710	BRINP1	2687	cellular response to retinoic acid	GO:0071300	biological process	11	4	0.2103	0.3163	0.1664	0.5118	0.0238	0.1656	0.2671	0.2181	0.4588	0.1217	0.2276
287	56710	BRINP1	2687	neuronal cell body	GO:0043025	cellular component	11	6	0.2174	0.2971	0.1703	0.4977	0.06676	0.1135	0.4163	0.1882	0.469	0.07329	0.3957
288	56710	BRINP1	2687	endoplasmic reticulum	GO:0005783	cellular component	11	18	0.2793	0.321	0.2408	0.439	0.03204	0.2073	0.3763	0.225	0.4579	0.1658	0.3499
289	56710	BRINP1	2687	protein binding	GO:0005515	molecular function	11	237	0.3155	0.3574	0.2797	0.4079	0.02827	0.2405	0.414	0.2655	0.4811	0.2041	0.3832
290	56710	BRINP1	2687	positive regulation of neuron differentiation	GO:0045666	biological process	11	11	0.3216	0.3384	0.2834	0.3962	0.06358	0.1862	0.5553	0.2138	0.5356	0.1488	0.5398
291	56710	BRINP1	2687	cytoplasm	GO:0005737	cellular component	11	35	0.3426	0.3574	0.3112	0.3849	0.02198	0.2785	0.4214	0.2655	0.4811	0.2456	0.3943
292	56710	BRINP1	2687	cell death	GO:0008219	biological process	11	6	0.4432	0.433	0.4204	0.312	0.02118	0.3723	0.5276	0.3442	0.5446	0.3467	0.5097
293	16504	KCNC3	6235	delayed rectifier potassium channel activity	GO:0005251	molecular function	10	3	0.08599	0.03042	0.01101	0.9019	0.009895	0.08287	0.08923	0.02329	0.03974	0.007912	0.01531
294	16504	KCNC3	6235	voltage-gated potassium channel activity	GO:0005249	molecular function	10	11	0.08599	0.03042	0.01558	0.8682	0.0141	0.08287	0.08923	0.02329	0.03974	0.01196	0.02029
295	16504	KCNC3	6235	protein tetramerization	GO:0051262	biological process	10	5	0.08599	0.03042	0.0158	0.8618	0.0263	0.08287	0.08923	0.02329	0.03974	0.009702	0.02573
296	16504	KCNC3	6235	potassium ion transmembrane transport	GO:0071805	biological process	10	9	0.08599	0.03042	0.01618	0.8616	0.02041	0.08287	0.08923	0.02329	0.03974	0.01128	0.02322
297	16504	KCNC3	6235	axon	GO:0030424	cellular component	10	12	0.08599	0.03042	0.01961	0.8326	0.03082	0.08287	0.08923	0.02329	0.03974	0.01113	0.03457
298	16504	KCNC3	6235	dendrite membrane	GO:0032590	cellular component	10	3	0.08599	0.03213	0.02195	0.8208	0.01051	0.08287	0.08923	0.02696	0.03829	0.01858	0.02594
299	16504	KCNC3	6235	integral component of membrane	GO:0016021	cellular component	10	18	0.08599	0.03213	0.02284	0.8155	0.01315	0.08287	0.08923	0.02696	0.03829	0.01859	0.02806
300	16504	KCNC3	6235	neuronal cell body membrane	GO:0032809	cellular component	10	4	0.08604	0.03153	0.01893	0.8313	0.03509	0.08284	0.08936	0.02377	0.04182	0.009249	0.03872
301	16504	KCNC3	6235	plasma membrane	GO:0005886	cellular component	10	52	0.09946	0.05014	0.04674	0.7119	0.0265	0.08237	0.1201	0.03321	0.0757	0.02981	0.07329
302	16504	KCNC3	6235	voltage-gated potassium channel complex	GO:0008076	cellular component	10	17	0.1137	0.06631	0.06402	0.6666	0.01973	0.1009	0.1281	0.0513	0.08572	0.04657	0.08802
303	70827	TRAK2	13206	cytoplasmic vesicle	GO:0031410	cellular component	13	33	0.08889	0.1007	0.03277	0.7623	0.01383	0.08101	0.09753	0.0789	0.1286	0.02593	0.0414
304	70827	TRAK2	13206	signaling receptor binding	GO:0005102	molecular function	13	59	0.08926	0.1007	0.02999	0.7761	0.03051	0.08525	0.09346	0.0789	0.1286	0.01808	0.04974
305	70827	TRAK2	13206	dendrite	GO:0030425	cellular component	13	13	0.0959	0.1007	0.03597	0.7489	0.0388	0.07492	0.1228	0.0789	0.1286	0.01877	0.06891
306	70827	TRAK2	13206	mitochondrion	GO:0005739	cellular component	13	12	0.1055	0.102	0.05441	0.6894	0.03192	0.08028	0.1386	0.07891	0.1318	0.03208	0.09228
307	70827	TRAK2	13206	protein targeting	GO:0006605	biological process	13	9	0.1064	0.102	0.05609	0.6852	0.0265	0.08314	0.1362	0.07891	0.1318	0.03605	0.08728
308	70827	TRAK2	13206	anterograde axonal transport of mitochondrion	GO:0098957	biological process	13	3	0.107	0.1029	0.05887	0.6791	0.01097	0.09981	0.1146	0.08002	0.1324	0.04921	0.07044
309	70827	TRAK2	13206	neurogenesis	GO:0022008	biological process	13	4	0.1088	0.1134	0.05545	0.686	0.0374	0.07944	0.149	0.1117	0.1151	0.03015	0.102
310	70827	TRAK2	13206	vesicle transport along microtubule	GO:0047496	biological process	13	8	0.1143	0.1029	0.06649	0.661	0.01409	0.1025	0.1274	0.08002	0.1324	0.05312	0.08323
311	70827	TRAK2	13206	GABA receptor binding	GO:0050811	molecular function	13	3	0.1261	0.1101	0.07014	0.6499	0.05298	0.08391	0.1894	0.07905	0.1534	0.02943	0.1672
312	70827	TRAK2	13206	protein binding	GO:0005515	molecular function	13	237	0.1274	0.1068	0.07765	0.6355	0.04051	0.08705	0.1864	0.07868	0.1451	0.0406	0.1485
313	70827	TRAK2	13206	mitochondrion distribution	GO:0048311	biological process	13	5	0.1472	0.1291	0.09438	0.6055	0.0415	0.1048	0.2069	0.1091	0.1527	0.04944	0.1802
314	70827	TRAK2	13206	myosin binding	GO:0017022	molecular function	13	9	0.1887	0.1503	0.1431	0.5364	0.03772	0.1308	0.2722	0.09706	0.2328	0.0862	0.2374
315	16979	LRRN1	20980	extracellular matrix	GO:0031012	cellular component	3	14	0.09983	0.1482	0.05079	0.7003	0.01341	0.08902	0.112	0.1183	0.1857	0.04045	0.06378
316	16979	LRRN1	20980	extracellular space	GO:0005615	cellular component	3	17	0.1524	0.1585	0.1057	0.5892	0.02284	0.1193	0.1948	0.1131	0.2221	0.07542	0.1481
317	16979	LRRN1	20980	protein binding	GO:0005515	molecular function	3	237	0.2561	0.2163	0.2163	0.4629	0.01114	0.2262	0.2899	0.1887	0.2479	0.1887	0.2479
318	23830	CAPN10	1477	mitochondrion	GO:0005739	cellular component	10	12	0.1863	0.3907	0.1384	0.5394	0.05057	0.1123	0.3091	0.2097	0.7282	0.07089	0.2701
319	23830	CAPN10	1477	cytosol	GO:0005829	cellular component	10	32	0.196	0.3907	0.1484	0.5267	0.05347	0.1157	0.3321	0.2097	0.7282	0.07458	0.2952
320	23830	CAPN10	1477	protein binding	GO:0005515	molecular function	10	237	0.2073	0.3907	0.1593	0.511	0.06413	0.1126	0.3816	0.2097	0.7282	0.0721	0.352
321	23830	CAPN10	1477	cytoplasm	GO:0005737	cellular component	10	35	0.2125	0.3907	0.1648	0.5047	0.06441	0.1151	0.3922	0.2097	0.7282	0.07451	0.3643
322	23830	CAPN10	1477	proteolysis	GO:0006508	biological process	10	9	0.2461	0.4987	0.2061	0.4721	0.01457	0.2103	0.2879	0.332	0.7492	0.1724	0.2465
323	23830	CAPN10	1477	calcium-dependent cysteine-type endopeptidase activity	GO:0004198	molecular function	10	2	0.4303	0.5907	0.4015	0.3136	0.06092	0.27	0.6856	0.4456	0.7829	0.2389	0.6748
324	23830	CAPN10	1477	positive regulation of glucose import	GO:0046326	biological process	10	3	0.573	0.6659	0.5569	0.2275	0.03744	0.4418	0.7432	0.5317	0.8339	0.4188	0.7406
325	23830	CAPN10	1477	cellular response to insulin stimulus	GO:0032869	biological process	10	3	0.6533	0.6959	0.6428	0.183	0.01996	0.5765	0.7402	0.6042	0.8015	0.5628	0.7341
326	23830	CAPN10	1477	positive regulation of insulin secretion	GO:0032024	biological process	10	5	0.6541	0.6973	0.6387	0.1717	0.05796	0.4514	0.9479	0.5335	0.9114	0.4261	0.9574
327	23830	CAPN10	1477	type B pancreatic cell apoptotic process	GO:0097050	biological process	10	2	0.6613	0.6959	0.6524	0.1759	0.02767	0.5607	0.7799	0.6042	0.8015	0.5503	0.7734
328	29816	HIP1R	18415	clathrin binding	GO:0030276	molecular function	32	5	0.08599	0.1863	0.01746	0.8371	0.03704	0.08287	0.08923	0.1107	0.3135	0.007649	0.03988
329	29816	HIP1R	18415	clathrin light chain binding	GO:0032051	molecular function	32	2	0.08599	0.1863	0.02338	0.8104	0.02955	0.08287	0.08923	0.1107	0.3135	0.01421	0.03847
330	29816	HIP1R	18415	clathrin adaptor activity	GO:0035615	molecular function	32	4	0.08614	0.1863	0.02453	0.8036	0.03294	0.08301	0.08939	0.1107	0.3135	0.01411	0.04263
331	29816	HIP1R	18415	receptor-mediated endocytosis	GO:0006898	biological process	32	9	0.0927	0.1886	0.03662	0.7469	0.03173	0.08176	0.1051	0.1147	0.3101	0.02147	0.06245
332	29816	HIP1R	18415	endocytosis	GO:0006897	biological process	32	11	0.1038	0.1944	0.05431	0.6911	0.009413	0.1012	0.1065	0.1251	0.3019	0.04652	0.0634
333	29816	HIP1R	18415	identical protein binding	GO:0042802	molecular function	32	14	0.1118	0.1944	0.06177	0.6716	0.02119	0.09969	0.1255	0.1251	0.3019	0.04352	0.08766
334	29816	HIP1R	18415	phosphatidylinositol binding	GO:0035091	molecular function	32	5	0.113	0.1886	0.05408	0.687	0.05883	0.06932	0.1841	0.1147	0.3101	0.02115	0.1383
335	29816	HIP1R	18415	actin filament binding	GO:0051015	molecular function	32	5	0.1157	0.1886	0.06094	0.672	0.04266	0.09015	0.1485	0.1147	0.3101	0.03003	0.1236
336	29816	HIP1R	18415	clathrin coat assembly	GO:0048268	biological process	32	4	0.1168	0.1929	0.03895	0.7282	0.09271	0.0661	0.2065	0.1091	0.341	0.008437	0.1799
337	29816	HIP1R	18415	intracellular membrane-bounded organelle	GO:0043231	cellular component	32	39	0.1213	0.1944	0.07	0.6522	0.03212	0.09766	0.1508	0.1251	0.3019	0.04135	0.1185
338	29816	HIP1R	18415	positive regulation of protein binding	GO:0032092	biological process	32	11	0.1282	0.1944	0.08199	0.6291	0.02227	0.1006	0.1633	0.1251	0.3019	0.05789	0.1161
339	29816	HIP1R	18415	clathrin-coated vesicle	GO:0030136	cellular component	32	6	0.133	0.1886	0.06745	0.655	0.06796	0.08861	0.1995	0.1147	0.3101	0.0224	0.2031
340	29816	HIP1R	18415	positive regulation of platelet-derived growth factor receptor-beta signaling pathway	GO:2000588	biological process	32	3	0.1603	0.2025	0.1087	0.5817	0.04402	0.1078	0.2384	0.1226	0.3344	0.05619	0.2104
341	29816	HIP1R	18415	plasma membrane	GO:0005886	cellular component	32	52	0.1634	0.197	0.1166	0.5737	0.01803	0.1397	0.191	0.126	0.308	0.08948	0.1519
342	29816	HIP1R	18415	protein binding	GO:0005515	molecular function	32	237	0.1643	0.1989	0.1177	0.5708	0.02878	0.1259	0.2144	0.1265	0.3127	0.07836	0.1768
343	29816	HIP1R	18415	phosphatidylinositol-3,4,5-trisphosphate binding	GO:0005547	molecular function	32	3	0.168	0.2158	0.1162	0.5672	0.05847	0.09451	0.2985	0.1176	0.3957	0.05232	0.2581
344	29816	HIP1R	18415	actin filament organization	GO:0007015	biological process	32	15	0.168	0.2065	0.1194	0.5666	0.03994	0.1137	0.248	0.1211	0.352	0.06844	0.2082
345	29816	HIP1R	18415	activation of cysteine-type endopeptidase activity involved in apoptotic process	GO:0006919	biological process	32	3	0.1695	0.207	0.1179	0.5673	0.04806	0.1084	0.2652	0.1209	0.3544	0.05972	0.2327
346	29816	HIP1R	18415	protein stabilization	GO:0050821	biological process	32	3	0.1737	0.197	0.1267	0.5598	0.01961	0.1453	0.2076	0.126	0.308	0.09523	0.1686
347	29816	HIP1R	18415	protein homodimerization activity	GO:0042803	molecular function	32	10	0.1786	0.197	0.1324	0.5527	0.0163	0.1544	0.2065	0.126	0.308	0.1051	0.1668
348	29816	HIP1R	18415	cytosol	GO:0005829	cellular component	32	32	0.1904	0.2087	0.1443	0.5363	0.03032	0.1442	0.2515	0.1278	0.3408	0.09601	0.2168
349	29816	HIP1R	18415	phosphatidylinositol-3,5-bisphosphate binding	GO:0080025	molecular function	32	3	0.194	0.2185	0.1424	0.531	0.06329	0.1065	0.3533	0.1166	0.4096	0.0628	0.3227
350	29816	HIP1R	18415	phosphatidylinositol-4,5-bisphosphate binding	GO:0005546	molecular function	32	3	0.1999	0.2187	0.1491	0.5228	0.06419	0.1095	0.365	0.1165	0.4103	0.06556	0.3389
351	29816	HIP1R	18415	positive regulation of mitochondrial outer membrane permeabilization involved in apoptotic signaling pathway	GO:1901030	biological process	32	5	0.2232	0.2385	0.1681	0.4984	0.07176	0.1158	0.4303	0.1249	0.4554	0.06314	0.4474
352	29816	HIP1R	18415	phosphatidylinositol-3,4-bisphosphate binding	GO:0043325	molecular function	32	2	0.231	0.2313	0.1828	0.4839	0.06905	0.1224	0.4358	0.1146	0.4668	0.07975	0.4191
353	29816	HIP1R	18415	positive regulation of epidermal growth factor receptor signaling pathway	GO:0045742	biological process	32	5	0.242	0.2443	0.1995	0.4769	0.03089	0.1799	0.3255	0.1527	0.3907	0.1376	0.2893
354	29816	HIP1R	18415	regulation of endocytosis	GO:0030100	biological process	32	12	0.2617	0.2559	0.2153	0.4554	0.05769	0.153	0.4477	0.128	0.5116	0.1032	0.4492
355	29816	HIP1R	18415	negative regulation of actin filament polymerization	GO:0030837	biological process	32	8	0.2736	0.2726	0.2202	0.4421	0.08122	0.1311	0.5713	0.1285	0.5784	0.07786	0.6229
356	29816	HIP1R	18415	positive regulation of apoptotic process	GO:0043065	biological process	32	24	0.2968	0.3158	0.26	0.4237	0.02765	0.2301	0.3828	0.2895	0.3445	0.1882	0.3592
357	29816	HIP1R	18415	ruffle membrane	GO:0032587	cellular component	32	3	0.3013	0.2773	0.256	0.4132	0.07672	0.1527	0.5945	0.1226	0.6273	0.1078	0.6082
358	29816	HIP1R	18415	regulation of actin cytoskeleton organization	GO:0032956	biological process	32	11	0.3593	0.3301	0.3193	0.367	0.06901	0.1963	0.6576	0.1588	0.686	0.1487	0.6856
359	17954	NAP1L2	7638	histone binding	GO:0042393	molecular function	7	9	0.08599	0.007913	0.001452	0.9629	0.01256	0.08287	0.08923	0.001684	0.03717	0.0002632	0.008007
360	17954	NAP1L2	7638	chromatin	GO:0000785	cellular component	7	10	0.08599	0.03194	0.01652	0.8576	0.02324	0.08287	0.08923	0.02936	0.03474	0.01077	0.02536
361	17954	NAP1L2	7638	nucleosome assembly	GO:0006334	biological process	7	9	0.08599	0.03194	0.01766	0.8518	0.01371	0.08287	0.08923	0.02936	0.03474	0.01387	0.02249
362	17954	NAP1L2	7638	nucleus	GO:0005634	cellular component	7	48	0.08599	0.03465	0.02635	0.7935	0.008856	0.08287	0.08923	0.02879	0.04171	0.02282	0.03042
363	17954	NAP1L2	7638	protein binding	GO:0005515	molecular function	7	237	0.0885	0.03846	0.03406	0.7567	0.01129	0.0859	0.09118	0.02879	0.05138	0.02812	0.04125
364	17954	NAP1L2	7638	chromatin binding	GO:0003682	molecular function	7	8	0.1156	0.06051	0.05488	0.6878	0.05475	0.08493	0.1573	0.02962	0.1236	0.02225	0.1354
365	108168164	ATP8A2	13533	ATPase-coupled intramembrane lipid transporter activity	GO:0140326	molecular function	8	7	0.09711	0.2376	0.04718	0.7108	0.01094	0.08602	0.1096	0.1551	0.3638	0.03917	0.05683
366	108168164	ATP8A2	13533	ATPase activity	GO:0016887	molecular function	8	20	0.1429	0.2376	0.09607	0.6036	0.02977	0.1039	0.1965	0.1551	0.3638	0.06172	0.1495
367	108168164	ATP8A2	13533	plasma membrane	GO:0005886	cellular component	8	52	0.1575	0.2376	0.1083	0.5833	0.04017	0.1049	0.2363	0.1551	0.3638	0.05911	0.1983
368	108168164	ATP8A2	13533	Golgi apparatus	GO:0005794	cellular component	8	12	0.1633	0.2376	0.1163	0.5729	0.03139	0.1161	0.2298	0.1551	0.3638	0.07279	0.1857
369	108168164	ATP8A2	13533	phospholipid translocation	GO:0045332	biological process	8	8	0.2311	0.2806	0.1891	0.4891	0.00691	0.2144	0.249	0.2399	0.3283	0.1734	0.2063
370	108168164	ATP8A2	13533	protein binding	GO:0005515	molecular function	8	237	0.2853	0.3121	0.2463	0.4341	0.03402	0.2041	0.3987	0.2465	0.395	0.164	0.3699
371	108168164	ATP8A2	13533	nucleoplasm	GO:0005654	cellular component	8	26	0.3038	0.3121	0.2678	0.4185	0.01928	0.2501	0.3691	0.2465	0.395	0.2147	0.3339
372	108168164	ATP8A2	13533	neuron development	GO:0048666	biological process	8	11	0.3824	0.3549	0.3549	0.3554	0.009392	0.3501	0.4177	0.3229	0.3901	0.3229	0.3901
373	67474	SNAP29	11133	synaptic vesicle priming	GO:0016082	biological process	20	3	0.08599	0.0406	0.0103	0.9015	0.01537	0.08287	0.08923	0.03531	0.04669	0.005651	0.01879
374	67474	SNAP29	11133	syntaxin binding	GO:0019905	molecular function	20	7	0.08599	0.0406	0.01277	0.8911	0.006255	0.08287	0.08923	0.03531	0.04669	0.01086	0.01503
375	67474	SNAP29	11133	autophagosome maturation	GO:0097352	biological process	20	2	0.08599	0.0406	0.01405	0.882	0.004243	0.08287	0.08923	0.03531	0.04669	0.01273	0.01552
376	67474	SNAP29	11133	ciliary pocket membrane	GO:0020018	cellular component	20	2	0.08599	0.0406	0.01303	0.8809	0.02148	0.08287	0.08923	0.03531	0.04669	0.00752	0.02258
377	67474	SNAP29	11133	autophagosome membrane docking	GO:0016240	biological process	20	2	0.08599	0.0406	0.0152	0.8622	0.03305	0.08287	0.08923	0.03531	0.04669	0.008049	0.02871
378	67474	SNAP29	11133	exocytosis	GO:0006887	biological process	20	7	0.08599	0.04189	0.0154	0.8679	0.01455	0.08287	0.08923	0.03872	0.04532	0.01132	0.02096
379	67474	SNAP29	11133	plasma membrane	GO:0005886	cellular component	20	52	0.08599	0.04334	0.02561	0.7983	0.01314	0.08287	0.08923	0.04204	0.04468	0.02081	0.03153
380	67474	SNAP29	11133	SNAP receptor activity	GO:0005484	molecular function	20	3	0.08639	0.04101	0.02125	0.8237	0.02827	0.08258	0.09037	0.03529	0.04766	0.01307	0.03454
381	67474	SNAP29	11133	synaptic vesicle fusion to presynaptic active zone membrane	GO:0031629	biological process	20	2	0.08645	0.0406	0.02057	0.8297	0.02971	0.084	0.08897	0.03531	0.04669	0.01252	0.03379
382	67474	SNAP29	11133	cilium assembly	GO:0060271	biological process	20	9	0.08666	0.04274	0.02813	0.7844	0.01509	0.08449	0.08889	0.03984	0.04584	0.02188	0.03618
383	67474	SNAP29	11133	SNARE complex	GO:0031201	cellular component	20	21	0.09107	0.04887	0.03617	0.7485	0.02408	0.08379	0.09897	0.04316	0.05534	0.02403	0.05445
384	67474	SNAP29	11133	protein binding	GO:0005515	molecular function	20	237	0.09121	0.04841	0.03779	0.7421	0.01598	0.08237	0.101	0.04276	0.05482	0.02874	0.04969
385	67474	SNAP29	11133	cytosol	GO:0005829	cellular component	20	32	0.09203	0.04841	0.03761	0.7431	0.02461	0.08026	0.1055	0.04276	0.05482	0.02478	0.05708
386	67474	SNAP29	11133	nucleoplasm	GO:0005654	cellular component	20	26	0.09298	0.04841	0.03857	0.7398	0.02387	0.08186	0.1056	0.04276	0.05482	0.02568	0.05792
387	67474	SNAP29	11133	centrosome	GO:0005813	cellular component	20	9	0.09454	0.0472	0.03794	0.742	0.02913	0.08227	0.1086	0.03952	0.05639	0.02323	0.06196
388	67474	SNAP29	11133	cytoplasm	GO:0005737	cellular component	20	35	0.09543	0.04859	0.04407	0.7208	0.01743	0.08278	0.11	0.04294	0.05499	0.03272	0.05936
389	67474	SNAP29	11133	vesicle fusion	GO:0006906	biological process	20	21	0.09846	0.05271	0.04105	0.7297	0.03732	0.07882	0.123	0.036	0.07716	0.02198	0.07668
390	237615	ANKRD52	26614	protein binding	GO:0005515	molecular function	1	237	0.2388	0.1978	0.1978	0.4802	0.01457	0.204	0.2795	0.1648	0.2374	0.1648	0.2374
391	19275	PTPRN	9676	ubiquitin-like protein ligase binding	GO:0044389	molecular function	12	5	0.08599	0.06462	0.01081	0.9036	0.01001	0.08287	0.08923	0.0413	0.1011	0.007968	0.01468
392	19275	PTPRN	9676	positive regulation of transcription by RNA polymerase II	GO:0045944	biological process	12	43	0.08599	0.06462	0.01552	0.8581	0.03538	0.08287	0.08923	0.0413	0.1011	0.007605	0.03167
393	19275	PTPRN	9676	transcription factor binding	GO:0008134	molecular function	12	8	0.08599	0.06462	0.02182	0.8223	0.01913	0.08287	0.08923	0.0413	0.1011	0.01606	0.02964
394	19275	PTPRN	9676	nucleus	GO:0005634	cellular component	12	48	0.08871	0.06796	0.03416	0.7563	0.01585	0.08066	0.09757	0.04239	0.109	0.02617	0.0446
395	19275	PTPRN	9676	protein binding	GO:0005515	molecular function	12	237	0.1026	0.07313	0.05322	0.6939	0.009972	0.09051	0.1163	0.0453	0.1181	0.04507	0.06284
396	19275	PTPRN	9676	positive regulation of type B pancreatic cell proliferation	GO:1904692	biological process	12	3	0.1032	0.07915	0.04576	0.713	0.04932	0.07285	0.1461	0.03668	0.1708	0.02033	0.103
397	19275	PTPRN	9676	spectrin binding	GO:0030507	molecular function	12	3	0.1151	0.08206	0.06162	0.6704	0.04242	0.08115	0.1633	0.03824	0.1761	0.03097	0.1226
398	19275	PTPRN	9676	insulin secretion	GO:0030073	biological process	12	4	0.1259	0.08296	0.07137	0.6475	0.04938	0.08265	0.1917	0.03793	0.1814	0.0323	0.1577
399	19275	PTPRN	9676	dense core granule maturation	GO:1990502	biological process	12	3	0.1299	0.08632	0.07728	0.6351	0.04732	0.08388	0.2012	0.04056	0.1837	0.03726	0.1603
400	19275	PTPRN	9676	response to reactive oxygen species	GO:0000302	biological process	12	11	0.1384	0.08981	0.08039	0.6245	0.06996	0.0746	0.2569	0.03567	0.2261	0.02801	0.2307
401	109108	SLC30A9	1329	nuclear receptor coactivator activity	GO:0030374	molecular function	8	2	0.08599	0.03235	0.013	0.8837	0.01758	0.08287	0.08923	0.02725	0.03841	0.008361	0.0202
402	109108	SLC30A9	1329	cellular zinc ion homeostasis	GO:0006882	biological process	8	5	0.08599	0.03235	0.01558	0.8629	0.02099	0.08287	0.08923	0.02725	0.03841	0.009798	0.02478
403	109108	SLC30A9	1329	zinc ion transport	GO:0006829	biological process	8	4	0.08599	0.03235	0.01681	0.8543	0.03035	0.08287	0.08923	0.02725	0.03841	0.009902	0.02855
404	109108	SLC30A9	1329	cytoskeleton	GO:0005856	cellular component	8	12	0.08599	0.03235	0.01804	0.8498	0.01198	0.08287	0.08923	0.02725	0.03841	0.01457	0.02234
405	109108	SLC30A9	1329	cytoplasmic vesicle	GO:0031410	cellular component	8	33	0.08638	0.03834	0.02502	0.8014	0.01873	0.08259	0.09033	0.02946	0.0499	0.01848	0.03388
406	109108	SLC30A9	1329	positive regulation of transcription by RNA polymerase II	GO:0045944	biological process	8	43	0.08829	0.03933	0.02591	0.7971	0.02516	0.08102	0.0962	0.02892	0.05347	0.01715	0.03912
407	109108	SLC30A9	1329	endoplasmic reticulum	GO:0005783	cellular component	8	18	0.09963	0.05744	0.05026	0.7024	0.003661	0.09395	0.1057	0.05412	0.06095	0.04736	0.05333
408	109108	SLC30A9	1329	nucleus	GO:0005634	cellular component	8	48	0.1138	0.06615	0.06615	0.6619	0.01336	0.09672	0.1339	0.05333	0.08205	0.05333	0.08205
409	50932	MINK1	17565	protein autophosphorylation	GO:0046777	biological process	17	10	0.08616	0.1402	0.03011	0.7744	0.01232	0.0833	0.08912	0.09658	0.2037	0.02449	0.03702
410	50932	MINK1	17565	regulation of cell-matrix adhesion	GO:0001952	biological process	17	7	0.08717	0.1402	0.03079	0.7709	0.01015	0.08195	0.09273	0.09658	0.2037	0.02593	0.03656
411	50932	MINK1	17565	extracellular exosome	GO:0070062	cellular component	17	24	0.09798	0.1402	0.04201	0.7275	0.03135	0.08611	0.1115	0.09658	0.2037	0.02471	0.0714
412	50932	MINK1	17565	protein phosphorylation	GO:0006468	biological process	17	28	0.1042	0.1402	0.05563	0.6874	0.01274	0.09357	0.116	0.09658	0.2037	0.04505	0.06869
413	50932	MINK1	17565	positive regulation of JNK cascade	GO:0046330	biological process	17	3	0.1115	0.1402	0.06392	0.6672	0.006332	0.1003	0.1239	0.09658	0.2037	0.05769	0.07082
414	50932	MINK1	17565	neuron projection morphogenesis	GO:0048812	biological process	17	7	0.1119	0.1414	0.06155	0.6705	0.03835	0.07821	0.1602	0.09616	0.2081	0.03309	0.1145
415	50932	MINK1	17565	Golgi apparatus	GO:0005794	cellular component	17	12	0.1253	0.1457	0.07902	0.6353	0.01033	0.1101	0.1427	0.09779	0.217	0.06711	0.09305
416	50932	MINK1	17565	protein serine/threonine kinase activity	GO:0004674	molecular function	17	28	0.1397	0.149	0.08972	0.6107	0.05298	0.08123	0.2401	0.09312	0.2384	0.04131	0.1949
417	50932	MINK1	17565	stress-activated protein kinase signaling cascade	GO:0031098	biological process	17	4	0.1453	0.166	0.09564	0.605	0.0276	0.1134	0.1863	0.1212	0.2274	0.06281	0.1456
418	50932	MINK1	17565	protein binding	GO:0005515	molecular function	17	237	0.1568	0.1562	0.1083	0.5839	0.03568	0.1081	0.2275	0.09889	0.2467	0.06292	0.1863
419	50932	MINK1	17565	actin cytoskeleton reorganization	GO:0031532	biological process	17	3	0.1585	0.1582	0.1072	0.5836	0.04888	0.09771	0.2573	0.09899	0.2529	0.05078	0.2264
420	50932	MINK1	17565	cytoplasm	GO:0005737	cellular component	17	35	0.1638	0.1596	0.1145	0.5735	0.04298	0.1062	0.2528	0.09859	0.2585	0.06008	0.2181
421	50932	MINK1	17565	regulation of cell migration	GO:0030334	biological process	17	29	0.2047	0.2065	0.1565	0.5134	0.06615	0.1073	0.3906	0.105	0.4062	0.06813	0.3597
422	50932	MINK1	17565	activation of protein kinase activity	GO:0032147	biological process	17	12	0.2125	0.2165	0.1664	0.5089	0.04148	0.1426	0.3167	0.1576	0.2975	0.0968	0.2859
423	50932	MINK1	17565	MAPK cascade	GO:0000165	biological process	17	10	0.2198	0.2055	0.1748	0.5007	0.03708	0.1526	0.3166	0.1391	0.3036	0.1099	0.2778
424	50932	MINK1	17565	regulation of cell-cell adhesion	GO:0022407	biological process	17	18	0.3979	0.3715	0.3715	0.3435	0.02076	0.3307	0.4788	0.3021	0.4568	0.3021	0.4568
425	234023	ARGLU1	25482	nucleoplasm	GO:0005654	cellular component	7	26	0.08599	0.03979	0.02251	0.8173	0.00895	0.08287	0.08923	0.02943	0.05381	0.0196	0.02584
426	234023	ARGLU1	25482	cytosol	GO:0005829	cellular component	7	32	0.08599	0.03979	0.02512	0.8006	0.006436	0.08287	0.08923	0.02943	0.05381	0.02265	0.02786
427	234023	ARGLU1	25482	protein binding	GO:0005515	molecular function	7	237	0.08758	0.03979	0.03318	0.7604	0.007968	0.0853	0.08991	0.02943	0.05381	0.02903	0.03794
428	234023	ARGLU1	25482	cadherin binding	GO:0045296	molecular function	7	6	0.08893	0.03979	0.03491	0.7533	0.01896	0.08839	0.08947	0.02943	0.05381	0.02538	0.04802
429	234023	ARGLU1	25482	mitochondrion	GO:0005739	cellular component	7	12	0.09115	0.04097	0.03636	0.7475	0.0242	0.08127	0.1022	0.02892	0.05804	0.02411	0.05483
430	12484	CD24	1645	membrane	GO:0016020	cellular component	22	35	0.137	0.5745	0.09125	0.6128	0.0204	0.1091	0.1722	0.4197	0.7865	0.06657	0.1251
431	12484	CD24	1645	cell surface	GO:0009986	cellular component	22	7	0.1541	0.5745	0.1081	0.5862	0.01549	0.1285	0.1848	0.4197	0.7865	0.08552	0.1366
432	12484	CD24	1645	positive regulation of MAP kinase activity	GO:0043406	biological process	22	7	0.1724	0.5745	0.12	0.5601	0.06492	0.09156	0.3245	0.4197	0.7865	0.05023	0.2868
433	12484	CD24	1645	protein tyrosine kinase activator activity	GO:0030296	molecular function	22	4	0.2059	0.5745	0.1626	0.5173	0.007653	0.1928	0.2199	0.4197	0.7865	0.1468	0.18
434	12484	CD24	1645	protein kinase binding	GO:0019901	molecular function	22	21	0.2074	0.5745	0.1635	0.5155	0.01661	0.1731	0.2485	0.4197	0.7865	0.1318	0.203
435	12484	CD24	1645	membrane raft	GO:0045121	cellular component	22	5	0.2463	0.5745	0.2061	0.4721	0.01492	0.2113	0.2872	0.4197	0.7865	0.1719	0.2471
436	12484	CD24	1645	T cell costimulation	GO:0031295	biological process	22	4	0.2621	0.5745	0.2196	0.453	0.0531	0.1568	0.4382	0.4197	0.7865	0.1146	0.4207
437	12484	CD24	1645	regulation of phosphorylation	GO:0042325	biological process	22	8	0.2724	0.593	0.2306	0.4468	0.03752	0.1939	0.3828	0.4532	0.776	0.146	0.3642
438	12484	CD24	1645	anchored component of external side of plasma membrane	GO:0031362	cellular component	22	3	0.2937	0.5745	0.2547	0.4252	0.0431	0.2002	0.431	0.4197	0.7865	0.1572	0.4127
439	12484	CD24	1645	positive regulation of activated T cell proliferation	GO:0042104	biological process	22	3	0.333	0.5745	0.2986	0.3908	0.04259	0.2296	0.4832	0.4197	0.7865	0.1928	0.4625
440	12484	CD24	1645	protein binding	GO:0005515	molecular function	22	237	0.3357	0.5875	0.302	0.3916	0.02268	0.2699	0.4176	0.431	0.801	0.2361	0.3863
441	12484	CD24	1645	B cell receptor transport into membrane raft	GO:0032597	biological process	22	4	0.3559	0.5875	0.3212	0.3699	0.05724	0.2151	0.5888	0.431	0.801	0.1783	0.5786
442	12484	CD24	1645	regulation of MAPK cascade	GO:0043408	biological process	22	8	0.4015	0.6049	0.3729	0.3393	0.03849	0.2929	0.5504	0.4737	0.7725	0.2581	0.5389
443	12484	CD24	1645	positive regulation of cytosolic calcium ion concentration	GO:0007204	biological process	22	10	0.4043	0.6019	0.3716	0.332	0.06441	0.2299	0.7108	0.4404	0.8227	0.1924	0.7179
444	12484	CD24	1645	negative regulation of transforming growth factor beta3 production	GO:0032913	biological process	22	4	0.4653	0.6178	0.4411	0.2935	0.04715	0.3157	0.686	0.4734	0.8062	0.286	0.6801
445	12484	CD24	1645	response to hypoxia	GO:0001666	biological process	22	7	0.5111	0.6377	0.4933	0.2661	0.03098	0.4023	0.6494	0.5106	0.7965	0.381	0.6388
446	12484	CD24	1645	respiratory burst	GO:0045730	biological process	22	4	0.5112	0.6186	0.49	0.2609	0.05436	0.3508	0.745	0.4917	0.7784	0.3245	0.7401
447	12484	CD24	1645	cell activation	GO:0001775	biological process	22	16	0.5566	0.6338	0.5406	0.2349	0.04383	0.4106	0.7545	0.5073	0.7918	0.3917	0.7461
448	12484	CD24	1645	glomerular parietal epithelial cell differentiation	GO:0072139	biological process	22	4	0.5757	0.6589	0.5597	0.2286	0.02756	0.4774	0.6942	0.5594	0.7761	0.4578	0.6842
449	12484	CD24	1645	response to estrogen	GO:0043627	biological process	22	3	0.5812	0.6443	0.5666	0.2235	0.03202	0.467	0.7232	0.529	0.7849	0.4501	0.7133
450	12484	CD24	1645	glomerular visceral epithelial cell differentiation	GO:0072112	biological process	22	5	0.6424	0.6666	0.6325	0.1894	0.01591	0.5796	0.7121	0.5721	0.7768	0.5698	0.7022
451	12484	CD24	1645	positive regulation of nephron tubule epithelial cell differentiation	GO:2000768	biological process	22	3	0.7101	0.7037	0.7033	0.1409	0.0423	0.5709	0.8833	0.5625	0.8803	0.5617	0.8805
452	319278	SHFL	25649	P-body	GO:0000932	cellular component	20	2	0.1115	0.2977	0.05687	0.6819	0.04581	0.07769	0.1601	0.223	0.3975	0.02704	0.1196
453	319278	SHFL	25649	sequence-specific mRNA binding	GO:1990825	molecular function	20	2	0.1147	0.2977	0.06072	0.6719	0.04584	0.07851	0.1675	0.223	0.3975	0.02922	0.1262
454	319278	SHFL	25649	RNA binding	GO:0003723	molecular function	20	43	0.1514	0.2977	0.1038	0.5916	0.02669	0.118	0.1943	0.223	0.3975	0.0701	0.1537
455	319278	SHFL	25649	defense response to virus	GO:0051607	biological process	20	6	0.1654	0.2977	0.1181	0.5687	0.03805	0.1153	0.2374	0.223	0.3975	0.06938	0.2009
456	319278	SHFL	25649	negative regulation of translational frameshifting	GO:2001125	biological process	20	3	0.1788	0.2977	0.1312	0.551	0.03852	0.1247	0.2563	0.223	0.3975	0.07769	0.2216
457	319278	SHFL	25649	innate immune response	GO:0045087	biological process	20	18	0.181	0.2977	0.1214	0.5566	0.07171	0.09764	0.3355	0.223	0.3975	0.04194	0.3512
458	319278	SHFL	25649	viral translational frameshifting	GO:0075523	biological process	20	2	0.2008	0.2988	0.1558	0.5233	0.02616	0.1586	0.2541	0.2253	0.3962	0.1103	0.2199
459	319278	SHFL	25649	nucleus	GO:0005634	cellular component	20	48	0.2019	0.2988	0.1573	0.5215	0.0267	0.1584	0.2574	0.2253	0.3962	0.1102	0.2246
460	319278	SHFL	25649	regulation of translational termination	GO:0006449	biological process	20	6	0.208	0.2977	0.1613	0.5142	0.0413	0.1419	0.3049	0.223	0.3975	0.09221	0.2823
461	319278	SHFL	25649	nucleoplasm	GO:0005654	cellular component	20	26	0.2254	0.3086	0.1831	0.4949	0.01489	0.1976	0.2571	0.2475	0.3848	0.1515	0.2211
462	319278	SHFL	25649	cytosol	GO:0005829	cellular component	20	32	0.2402	0.3086	0.1991	0.4793	0.005744	0.2296	0.2512	0.2475	0.3848	0.1854	0.2139
463	319278	SHFL	25649	ribosome binding	GO:0043022	molecular function	20	3	0.2404	0.3195	0.1921	0.477	0.05993	0.1386	0.4171	0.2174	0.4694	0.08935	0.413
464	319278	SHFL	25649	protein binding	GO:0005515	molecular function	20	237	0.2513	0.3108	0.2102	0.4684	0.0137	0.2199	0.2871	0.2483	0.389	0.1781	0.248
465	319278	SHFL	25649	cytoplasm	GO:0005737	cellular component	20	35	0.2597	0.3108	0.2186	0.4602	0.01942	0.2173	0.3105	0.2483	0.389	0.1725	0.277
466	319278	SHFL	25649	negative regulation of viral genome replication	GO:0045071	biological process	20	4	0.2845	0.3263	0.2402	0.4315	0.06369	0.1621	0.4992	0.2171	0.4903	0.1172	0.4923
467	319278	SHFL	25649	response to type I interferon	GO:0034340	biological process	20	3	0.3591	0.3401	0.3278	0.3724	0.02694	0.2881	0.4475	0.2577	0.4488	0.2482	0.433
468	319278	SHFL	25649	response to type III interferon	GO:0034342	biological process	20	3	0.3593	0.3401	0.3274	0.373	0.02423	0.2949	0.4377	0.2577	0.4488	0.2556	0.4193
469	319278	SHFL	25649	response to interferon-beta	GO:0035456	biological process	20	3	0.3598	0.3401	0.3282	0.3727	0.02227	0.3001	0.4313	0.2577	0.4488	0.261	0.4129
470	319278	SHFL	25649	response to interferon-gamma	GO:0034341	biological process	20	3	0.36	0.3401	0.3284	0.3722	0.0251	0.2937	0.4411	0.2577	0.4488	0.2541	0.4244
471	93710	PCDHGA2	8700	integral component of plasma membrane	GO:0005887	cellular component	2	31	0.1243	0.1513	0.07567	0.6415	0.0195	0.1083	0.1428	0.1107	0.2068	0.05537	0.1034
472	93710	PCDHGA2	8700	cell adhesion	GO:0007155	biological process	2	13	0.305	0.2671	0.2671	0.4168	0.03461	0.2243	0.4147	0.179	0.3984	0.179	0.3984
473	16476	JUN	6204	positive regulation of transcription by RNA polymerase II	GO:0045944	biological process	90	43	0.08599	0.0335	0.00396	0.9359	0.01759	0.08287	0.08923	0.0194	0.05784	0.0007147	0.02194
474	16476	JUN	6204	positive regulation of DNA-templated transcription, initiation	GO:2000144	biological process	90	4	0.08599	0.0335	0.003709	0.9148	0.04444	0.08287	0.08923	0.0194	0.05784	0.0005432	0.02533
475	16476	JUN	6204	enzyme binding	GO:0019899	molecular function	90	34	0.08599	0.03364	0.002447	0.9595	0.007543	0.08287	0.08923	0.01965	0.05762	0.001129	0.005302
476	16476	JUN	6204	ubiquitin-like protein ligase binding	GO:0044389	molecular function	90	5	0.08599	0.0417	0.00318	0.955	0.004314	0.08287	0.08923	0.03603	0.04826	0.002049	0.004936
477	16476	JUN	6204	DNA-binding transcription factor activity, RNA polymerase II-specific	GO:0000981	molecular function	90	13	0.08599	0.0417	0.006451	0.9328	0.005611	0.08287	0.08923	0.03603	0.04826	0.00451	0.009229
478	16476	JUN	6204	sequence-specific double-stranded DNA binding	GO:1990837	molecular function	90	15	0.08599	0.0417	0.01203	0.8929	0.013	0.08287	0.08923	0.03603	0.04826	0.008051	0.01799
479	16476	JUN	6204	cAMP response element binding	GO:0035497	molecular function	90	2	0.08599	0.0417	0.01223	0.8887	0.02061	0.08287	0.08923	0.03603	0.04826	0.007639	0.01957
480	16476	JUN	6204	ubiquitin protein ligase binding	GO:0031625	molecular function	90	6	0.08599	0.0417	0.01284	0.8883	0.01149	0.08287	0.08923	0.03603	0.04826	0.009358	0.01763
481	16476	JUN	6204	transcription factor binding	GO:0008134	molecular function	90	8	0.08599	0.0417	0.0128	0.8868	0.01677	0.08287	0.08923	0.03603	0.04826	0.008841	0.01854
482	16476	JUN	6204	negative regulation of transcription from RNA polymerase II promoter in response to endoplasmic reticulum stress	GO:1990441	biological process	90	3	0.08599	0.0417	0.01325	0.8858	0.01161	0.08287	0.08923	0.03603	0.04826	0.01008	0.01742
483	16476	JUN	6204	negative regulation of transcription by RNA polymerase II	GO:0000122	biological process	90	29	0.08599	0.0417	0.01358	0.8774	0.02071	0.08287	0.08923	0.03603	0.04826	0.00805	0.02291
484	16476	JUN	6204	DNA-binding transcription activator activity, RNA polymerase II-specific	GO:0001228	molecular function	90	6	0.08599	0.0417	0.01495	0.8754	0.003817	0.08287	0.08923	0.03603	0.04826	0.01376	0.01624
485	16476	JUN	6204	cellular response to cadmium ion	GO:0071276	biological process	90	3	0.08599	0.0417	0.01409	0.8717	0.03002	0.08287	0.08923	0.03603	0.04826	0.007848	0.0253
486	16476	JUN	6204	DNA-binding transcription repressor activity, RNA polymerase II-specific	GO:0001227	molecular function	90	4	0.08599	0.0417	0.01584	0.8645	0.01671	0.08287	0.08923	0.03603	0.04826	0.0113	0.02222
487	16476	JUN	6204	RNA polymerase II cis-regulatory region sequence-specific DNA binding	GO:0000978	molecular function	90	22	0.08599	0.0417	0.01797	0.8507	0.008876	0.08287	0.08923	0.03603	0.04826	0.01544	0.0209
488	16476	JUN	6204	transcription regulatory region sequence-specific DNA binding	GO:0000976	molecular function	90	16	0.08599	0.0417	0.01826	0.8484	0.01076	0.08287	0.08923	0.03603	0.04826	0.01531	0.02179
489	16476	JUN	6204	RNA binding	GO:0003723	molecular function	90	43	0.08599	0.04216	0.01849	0.8458	0.0158	0.08287	0.08923	0.03568	0.04983	0.01432	0.02387
490	16476	JUN	6204	regulation of transcription by RNA polymerase II	GO:0006357	biological process	90	42	0.08599	0.04229	0.02082	0.8291	0.01218	0.08287	0.08923	0.03558	0.05027	0.01715	0.02528
491	16476	JUN	6204	nucleus	GO:0005634	cellular component	90	48	0.08599	0.04252	0.02016	0.8316	0.02454	0.08287	0.08923	0.03541	0.05106	0.01323	0.03074
492	16476	JUN	6204	plasma membrane	GO:0005886	cellular component	90	52	0.08599	0.04252	0.02174	0.8215	0.02273	0.08287	0.08923	0.03541	0.05106	0.01496	0.03157
493	16476	JUN	6204	protein binding	GO:0005515	molecular function	90	237	0.08599	0.04257	0.02466	0.8038	0.02367	0.08287	0.08923	0.03538	0.05123	0.01676	0.03629
494	16476	JUN	6204	nucleoplasm	GO:0005654	cellular component	90	26	0.08599	0.04274	0.02322	0.8119	0.02691	0.08287	0.08923	0.0357	0.05116	0.01487	0.03626
495	16476	JUN	6204	negative regulation of transcription, DNA-templated	GO:0045892	biological process	90	27	0.08599	0.04294	0.02671	0.7922	0.01642	0.08287	0.08923	0.0361	0.05109	0.02054	0.03474
496	16476	JUN	6204	positive regulation of vascular associated smooth muscle cell proliferation	GO:1904707	biological process	90	3	0.08604	0.0417	0.01822	0.8464	0.02546	0.08284	0.08936	0.03603	0.04826	0.01194	0.0278
497	16476	JUN	6204	positive regulation of pri-miRNA transcription by RNA polymerase II	GO:1902895	biological process	90	3	0.08604	0.0417	0.02226	0.8189	0.01641	0.08284	0.08936	0.03603	0.04826	0.01712	0.02893
498	16476	JUN	6204	DNA-binding transcription factor activity	GO:0003700	molecular function	90	10	0.08604	0.04257	0.02789	0.7853	0.008498	0.08284	0.08936	0.03538	0.05123	0.0242	0.03215
499	16476	JUN	6204	identical protein binding	GO:0042802	molecular function	90	14	0.08634	0.04326	0.02624	0.7951	0.02758	0.08316	0.08965	0.03573	0.05237	0.01674	0.04112
500	16476	JUN	6204	euchromatin	GO:0000791	cellular component	90	3	0.08639	0.04408	0.02897	0.7797	0.008753	0.08387	0.08899	0.03821	0.05086	0.02501	0.03356
501	16476	JUN	6204	positive regulation of transcription, DNA-templated	GO:0045893	biological process	90	28	0.08654	0.04464	0.03302	0.7612	0.00654	0.083	0.09024	0.03834	0.05197	0.02961	0.03682
502	16476	JUN	6204	R-SMAD binding	GO:0070412	molecular function	90	2	0.08704	0.04324	0.02794	0.7857	0.02727	0.08336	0.09088	0.03488	0.0536	0.01783	0.04379
503	16476	JUN	6204	cellular response to reactive oxygen species	GO:0034614	biological process	90	10	0.08749	0.04338	0.02819	0.7844	0.02496	0.08328	0.09191	0.03477	0.05413	0.01858	0.04279
504	16476	JUN	6204	transcription regulator complex	GO:0005667	cellular component	90	11	0.08845	0.04658	0.03544	0.7511	0.01015	0.08592	0.09105	0.04094	0.05299	0.02984	0.04208
505	16476	JUN	6204	GTPase activator activity	GO:0005096	molecular function	90	7	0.09	0.04758	0.03704	0.7451	0.01695	0.08671	0.09342	0.04051	0.05588	0.02772	0.0495
506	16476	JUN	6204	negative regulation by host of viral transcription	GO:0043922	biological process	90	3	0.09608	0.05272	0.03978	0.735	0.03376	0.08264	0.1117	0.03618	0.0768	0.02252	0.07026
507	16476	JUN	6204	positive regulation by host of viral transcription	GO:0043923	biological process	90	2	0.0977	0.05672	0.04466	0.7187	0.02699	0.08028	0.1189	0.03725	0.08637	0.02822	0.07066
508	16476	JUN	6204	SMAD protein signal transduction	GO:0060395	biological process	90	2	0.09889	0.05552	0.03524	0.7521	0.05212	0.07275	0.1344	0.03205	0.09619	0.01491	0.08333
509	16476	JUN	6204	RNA polymerase II activating transcription factor binding	GO:0001102	molecular function	90	3	0.105	0.0658	0.05537	0.6877	0.01799	0.08809	0.1251	0.04813	0.08996	0.0409	0.07496
510	16476	JUN	6204	regulation of cell cycle	GO:0051726	biological process	90	9	0.1056	0.06023	0.0302	0.7683	0.0811	0.06833	0.1631	0.02977	0.1219	0.007651	0.1192
511	16476	JUN	6204	transcription factor AP-1 complex	GO:0035976	cellular component	90	3	0.1068	0.06637	0.0578	0.6817	0.01641	0.09073	0.1257	0.04933	0.08929	0.04393	0.07605
512	16476	JUN	6204	negative regulation of DNA binding	GO:0043392	biological process	90	9	0.1159	0.07451	0.06594	0.6605	0.03785	0.08177	0.1644	0.04341	0.1279	0.03569	0.1218
513	16476	JUN	6204	Ras protein signal transduction	GO:0007265	biological process	90	10	0.1162	0.07555	0.0688	0.656	0.01516	0.09853	0.137	0.05707	0.1	0.05384	0.08791
514	16476	JUN	6204	transforming growth factor beta receptor signaling pathway	GO:0007179	biological process	90	9	0.1428	0.1016	0.09608	0.605	0.01252	0.1243	0.1641	0.08576	0.1203	0.07935	0.1163
515	16476	JUN	6204	positive regulation of apoptotic process	GO:0043065	biological process	90	24	0.2788	0.2371	0.2353	0.4349	0.06647	0.1517	0.5125	0.1112	0.5056	0.1089	0.5085
516	16476	JUN	6204	regulation of cell population proliferation	GO:0042127	biological process	90	34	0.3228	0.2912	0.2871	0.3997	0.04151	0.2234	0.4664	0.1881	0.4508	0.1865	0.442
517	79554	CPTP	28116	phospholipid binding	GO:0005543	molecular function	11	13	0.09839	0.2304	0.041	0.7305	0.03687	0.07896	0.1226	0.1944	0.273	0.02214	0.07592
518	79554	CPTP	28116	ceramide 1-phosphate binding	GO:1902387	molecular function	11	4	0.1066	0.2304	0.05765	0.6823	0.01393	0.09055	0.1254	0.1944	0.273	0.0459	0.07242
519	79554	CPTP	28116	ceramide 1-phosphate transport	GO:1902389	biological process	11	4	0.1259	0.2304	0.0793	0.6345	0.01722	0.1055	0.1502	0.1944	0.273	0.06033	0.1042
520	79554	CPTP	28116	ceramide transport	GO:0035627	biological process	11	7	0.1329	0.2304	0.08672	0.621	0.01131	0.1161	0.152	0.1944	0.273	0.07264	0.1035
521	79554	CPTP	28116	membrane	GO:0016020	cellular component	11	35	0.173	0.2627	0.1268	0.5589	0.02587	0.1297	0.2306	0.2141	0.3223	0.08687	0.1852
522	79554	CPTP	28116	intermembrane lipid transfer	GO:0120009	biological process	11	6	0.186	0.2608	0.1409	0.5414	0.02248	0.1481	0.2334	0.2141	0.3175	0.104	0.1909
523	79554	CPTP	28116	cytosol	GO:0005829	cellular component	11	32	0.2541	0.3224	0.213	0.4631	0.03561	0.1812	0.3564	0.2362	0.44	0.1399	0.3243
524	79554	CPTP	28116	ceramide 1-phosphate transfer activity	GO:1902388	molecular function	11	3	0.2994	0.3503	0.2625	0.4231	0.01362	0.2686	0.3337	0.3294	0.3725	0.2253	0.3058
525	79554	CPTP	28116	negative regulation of NLRP3 inflammasome complex assembly	GO:1900226	biological process	11	3	0.3723	0.4254	0.3393	0.3569	0.05737	0.221	0.627	0.268	0.6752	0.1834	0.6278
526	79554	CPTP	28116	negative regulation of interleukin-1 beta production	GO:0032691	biological process	11	3	0.4463	0.4792	0.4192	0.2968	0.07303	0.2583	0.7709	0.2948	0.779	0.2286	0.7687
527	79554	CPTP	28116	negative regulation of autophagy	GO:0010507	biological process	11	7	0.5637	0.5671	0.5494	0.2366	0.01316	0.5108	0.6221	0.4869	0.6606	0.4961	0.6084
528	106042	PRICKLE1	17019	negative regulation of transcription, DNA-templated	GO:0045892	biological process	11	27	0.2878	0.9819	0.248	0.4325	0.0346	0.2105	0.3933	0.9578	1.007	0.1648	0.3734
529	106042	PRICKLE1	17019	nucleus	GO:0005634	cellular component	11	48	0.4766	0.9819	0.4569	0.2911	0.007443	0.4457	0.5097	0.9578	1.007	0.4282	0.4876
530	106042	PRICKLE1	17019	protein binding	GO:0005515	molecular function	11	237	0.5643	0.9819	0.5499	0.2366	0.01035	0.5232	0.6088	0.9578	1.007	0.5083	0.5948
531	106042	PRICKLE1	17019	positive regulation of protein ubiquitination	GO:0031398	biological process	11	9	0.5734	0.9819	0.5593	0.2315	0.003018	0.5616	0.5853	0.9578	1.007	0.5464	0.5724
532	106042	PRICKLE1	17019	cytosol	GO:0005829	cellular component	11	32	0.6002	0.9819	0.5886	0.215	0.001286	0.5921	0.6085	0.9578	1.007	0.5831	0.5942
533	106042	PRICKLE1	17019	protein import into nucleus	GO:0006606	biological process	11	9	0.7244	0.9819	0.7182	0.1398	0.02087	0.6481	0.8097	0.9578	1.007	0.6406	0.8053
534	106042	PRICKLE1	17019	nuclear membrane	GO:0031965	cellular component	11	7	0.738	0.9819	0.7308	0.1307	0.02661	0.6455	0.8438	0.9578	1.007	0.6366	0.8389
535	106042	PRICKLE1	17019	positive regulation of proteasomal ubiquitin-dependent protein catabolic process	GO:0032436	biological process	11	9	0.8208	0.9819	0.8152	0.05611	0.05912	0.6285	1.072	0.9578	1.007	0.6178	1.076
536	106042	PRICKLE1	17019	negative regulation of cardiac muscle cell myoblast differentiation	GO:2000691	biological process	11	4	0.8511	0.9819	0.8474	0.05654	0.02421	0.7754	0.9342	0.9578	1.007	0.7703	0.9321
537	106042	PRICKLE1	17019	neural tube closure	GO:0001843	biological process	11	2	0.9755	0.9819	0.9749	-0.07187	0.01388	0.9581	0.9933	0.9578	1.007	0.9575	0.9925
538	106042	PRICKLE1	17019	negative regulation of canonical Wnt signaling pathway	GO:0090090	biological process	11	10	0.981	0.9819	0.9805	-0.09774	0.02631	0.9549	1.008	0.9578	1.007	0.9539	1.008
539	228482	ARHGAP11A	15783	GTPase activator activity	GO:0005096	molecular function	3	7	0.08612	0.02582	0.02582	0.7969	0.01205	0.08319	0.08915	0.02123	0.0314	0.02123	0.0314
540	407823	BAZ2B	963	protein binding	GO:0005515	molecular function	2	237	0.08599	0.02737	0.02737	0.7877	0.002218	0.08287	0.08923	0.02639	0.02838	0.02639	0.02838
541	109689	ARRB1	711	angiotensin receptor binding	GO:0031701	molecular function	43	4	0.08599	0.04931	0.001644	0.9689	0.001516	0.08287	0.08923	0.03521	0.06905	0.001294	0.002091
542	109689	ARRB1	711	nuclear body	GO:0016604	cellular component	43	15	0.08599	0.05947	0.004088	0.948	0.005041	0.08287	0.08923	0.03877	0.09122	0.002639	0.006333
543	109689	ARRB1	711	ubiquitin-dependent protein catabolic process	GO:0006511	biological process	43	7	0.08599	0.05947	0.01685	0.8452	0.03266	0.08287	0.08923	0.03877	0.09122	0.008199	0.03464
544	109689	ARRB1	711	positive regulation of histone H4 acetylation	GO:0090240	biological process	43	4	0.08599	0.05947	0.01895	0.8385	0.02354	0.08287	0.08923	0.03877	0.09122	0.01235	0.02909
545	109689	ARRB1	711	chromatin	GO:0000785	cellular component	43	10	0.08599	0.05947	0.02189	0.8209	0.02559	0.08287	0.08923	0.03877	0.09122	0.01432	0.03346
546	109689	ARRB1	711	ubiquitin protein ligase binding	GO:0031625	molecular function	43	6	0.08599	0.05947	0.02268	0.8159	0.002023	0.08287	0.08923	0.03877	0.09122	0.02198	0.02341
547	109689	ARRB1	711	positive regulation of protein phosphorylation	GO:0001934	biological process	43	16	0.08599	0.05947	0.025	0.8017	0.01255	0.08287	0.08923	0.03877	0.09122	0.02053	0.03044
548	109689	ARRB1	711	positive regulation of transcription by RNA polymerase II	GO:0045944	biological process	43	43	0.08599	0.05947	0.02618	0.795	0.01526	0.08287	0.08923	0.03877	0.09122	0.02035	0.03368
549	109689	ARRB1	711	regulation of transcription by RNA polymerase II	GO:0006357	biological process	43	42	0.08599	0.05947	0.02841	0.7827	0.01069	0.08287	0.08923	0.03877	0.09122	0.02374	0.034
550	109689	ARRB1	711	nucleus	GO:0005634	cellular component	43	48	0.08604	0.05947	0.02453	0.8041	0.02918	0.08284	0.08936	0.03877	0.09122	0.01515	0.03973
551	109689	ARRB1	711	positive regulation of histone acetylation	GO:0035066	biological process	43	10	0.08604	0.05947	0.02544	0.7994	0.0288	0.08284	0.08936	0.03877	0.09122	0.01591	0.04067
552	109689	ARRB1	711	GTPase activator activity	GO:0005096	molecular function	43	7	0.08604	0.05947	0.02617	0.7943	0.005397	0.08284	0.08936	0.03877	0.09122	0.02397	0.02857
553	109689	ARRB1	711	arrestin family protein binding	GO:1990763	molecular function	43	2	0.08615	0.05947	0.02524	0.8001	0.01956	0.08276	0.08968	0.03877	0.09122	0.01836	0.03468
554	109689	ARRB1	711	nucleoplasm	GO:0005654	cellular component	43	26	0.08686	0.06076	0.02567	0.7956	0.03821	0.08221	0.09177	0.0388	0.09514	0.01324	0.04978
555	109689	ARRB1	711	protein ubiquitination	GO:0016567	biological process	43	10	0.09127	0.06107	0.03304	0.7624	0.03307	0.08335	0.09994	0.0388	0.09613	0.0191	0.05716
556	109689	ARRB1	711	insulin-like growth factor receptor binding	GO:0005159	molecular function	43	2	0.09146	0.0604	0.03789	0.7417	0.02243	0.08151	0.1026	0.03881	0.094	0.0259	0.05543
557	109689	ARRB1	711	transcription factor binding	GO:0008134	molecular function	43	8	0.09273	0.05958	0.03003	0.7758	0.04407	0.07972	0.1079	0.03877	0.09157	0.01437	0.06272
558	109689	ARRB1	711	cytoplasmic vesicle	GO:0031410	cellular component	43	33	0.09282	0.06114	0.03591	0.7507	0.03354	0.08076	0.1067	0.0388	0.09634	0.02063	0.06251
559	109689	ARRB1	711	cytosol	GO:0005829	cellular component	43	32	0.09424	0.06114	0.03654	0.7483	0.03629	0.08102	0.1096	0.0388	0.09634	0.02007	0.06652
560	109689	ARRB1	711	transcription coactivator activity	GO:0003713	molecular function	43	3	0.09455	0.06145	0.03995	0.7342	0.02635	0.07716	0.1159	0.03877	0.0974	0.0256	0.06237
561	109689	ARRB1	711	plasma membrane	GO:0005886	cellular component	43	52	0.09478	0.06114	0.04196	0.7276	0.02241	0.08241	0.109	0.0388	0.09634	0.02857	0.06163
562	109689	ARRB1	711	proteasome-mediated ubiquitin-dependent protein catabolic process	GO:0043161	biological process	43	14	0.09555	0.06146	0.04441	0.7193	0.0185	0.08067	0.1132	0.03878	0.09741	0.03245	0.06078
563	109689	ARRB1	711	G protein-coupled receptor internalization	GO:0002031	biological process	43	4	0.09576	0.06145	0.0362	0.7488	0.04134	0.07502	0.1222	0.03877	0.0974	0.01825	0.07184
564	109689	ARRB1	711	stress fiber assembly	GO:0043149	biological process	43	3	0.09617	0.06145	0.03941	0.7357	0.03456	0.07472	0.1238	0.03877	0.0974	0.02204	0.07049
565	109689	ARRB1	711	cytoplasm	GO:0005737	cellular component	43	35	0.09629	0.06114	0.0429	0.7243	0.02522	0.08264	0.1122	0.0388	0.09634	0.02793	0.06589
566	109689	ARRB1	711	G protein-coupled receptor binding	GO:0001664	molecular function	43	45	0.09684	0.06392	0.04604	0.7139	0.01629	0.0878	0.1068	0.04439	0.09203	0.0349	0.06073
567	109689	ARRB1	711	protein binding	GO:0005515	molecular function	43	237	0.09808	0.06114	0.04608	0.714	0.02417	0.08347	0.1152	0.0388	0.09634	0.03061	0.06935
568	109689	ARRB1	711	positive regulation of ERK1 and ERK2 cascade	GO:0070374	biological process	43	6	0.1012	0.06331	0.04908	0.7049	0.02837	0.0829	0.1236	0.03878	0.1034	0.03052	0.07892
569	109689	ARRB1	711	negative regulation of NF-kappaB transcription factor activity	GO:0032088	biological process	43	3	0.1023	0.06665	0.05312	0.6945	0.009123	0.09598	0.109	0.05008	0.0887	0.04576	0.06168
570	109689	ARRB1	711	negative regulation of interleukin-8 production	GO:0032717	biological process	43	3	0.107	0.06375	0.04923	0.7043	0.04614	0.0837	0.1368	0.03882	0.1047	0.02284	0.1061
571	109689	ARRB1	711	negative regulation of protein ubiquitination	GO:0031397	biological process	43	8	0.1075	0.06472	0.05218	0.6952	0.04351	0.07994	0.1446	0.03835	0.1092	0.02533	0.1075
572	109689	ARRB1	711	negative regulation of interleukin-6 production	GO:0032715	biological process	43	3	0.1087	0.06375	0.05191	0.6961	0.04416	0.08373	0.1411	0.03882	0.1047	0.02483	0.1085
573	109689	ARRB1	711	positive regulation of Rho protein signal transduction	GO:0035025	biological process	43	3	0.1124	0.06575	0.06121	0.672	0.03494	0.08481	0.149	0.03885	0.1113	0.03429	0.1093
574	109689	ARRB1	711	positive regulation of receptor internalization	GO:0002092	biological process	43	6	0.1129	0.06881	0.06326	0.6677	0.02641	0.08919	0.1429	0.04445	0.1065	0.0408	0.09807
575	109689	ARRB1	711	negative regulation of Notch signaling pathway	GO:0045746	biological process	43	4	0.1692	0.1241	0.1241	0.5633	0.01862	0.1384	0.2069	0.09438	0.1631	0.09438	0.1631
576	18763	PKD1	9008	calcium channel complex	GO:0034704	cellular component	36	4	0.08691	0.1261	0.02749	0.7881	0.02369	0.08381	0.09012	0.0689	0.2307	0.01868	0.04045
577	18763	PKD1	9008	mesonephric duct development	GO:0072177	biological process	36	3	0.08919	0.1261	0.02206	0.8192	0.03908	0.08026	0.09911	0.0689	0.2307	0.0114	0.04269
578	18763	PKD1	9008	ion channel binding	GO:0044325	molecular function	36	4	0.08998	0.1261	0.02176	0.812	0.04724	0.07959	0.1017	0.0689	0.2307	0.00876	0.05406
579	18763	PKD1	9008	integral component of plasma membrane	GO:0005887	cellular component	36	31	0.09144	0.1261	0.03522	0.7522	0.02409	0.08348	0.1002	0.0689	0.2307	0.02338	0.05307
580	18763	PKD1	9008	cilium	GO:0005929	cellular component	36	8	0.09555	0.1261	0.0387	0.7388	0.03678	0.08012	0.114	0.0689	0.2307	0.02091	0.07161
581	18763	PKD1	9008	protein heterotetramerization	GO:0051290	biological process	36	3	0.09776	0.1261	0.04582	0.7149	0.01886	0.08542	0.1119	0.0689	0.2307	0.03325	0.06315
582	18763	PKD1	9008	metanephric collecting duct development	GO:0072205	biological process	36	2	0.09845	0.1357	0.03004	0.7762	0.05943	0.07307	0.1327	0.06493	0.2835	0.01129	0.07996
583	18763	PKD1	9008	cation channel complex	GO:0034703	cellular component	36	9	0.1006	0.1261	0.03862	0.7394	0.0487	0.08198	0.1235	0.0689	0.2307	0.01725	0.08643
584	18763	PKD1	9008	plasma membrane	GO:0005886	cellular component	36	52	0.1014	0.1261	0.05113	0.6991	0.0205	0.08611	0.1194	0.0689	0.2307	0.03612	0.07238
585	18763	PKD1	9008	mesonephric tubule development	GO:0072164	biological process	36	8	0.1016	0.1384	0.03862	0.7377	0.05473	0.07091	0.1455	0.06384	0.3002	0.01563	0.09545
586	18763	PKD1	9008	Wnt-activated receptor activity	GO:0042813	molecular function	36	2	0.1025	0.1261	0.04941	0.7038	0.02767	0.08385	0.1254	0.0689	0.2307	0.03119	0.07829
587	18763	PKD1	9008	basolateral plasma membrane	GO:0016323	cellular component	36	3	0.1136	0.1384	0.04713	0.7092	0.07153	0.07664	0.1684	0.06384	0.3002	0.01467	0.1514
588	18763	PKD1	9008	metanephric distal tubule morphogenesis	GO:0072287	biological process	36	3	0.1136	0.1439	0.05802	0.6775	0.05619	0.06943	0.186	0.06902	0.3002	0.02372	0.1419
589	18763	PKD1	9008	protein domain specific binding	GO:0019904	molecular function	36	77	0.1209	0.1461	0.02883	0.7364	0.1127	0.06002	0.2434	0.06095	0.3501	0.003249	0.2559
590	18763	PKD1	9008	neural tube development	GO:0021915	biological process	36	3	0.1225	0.1461	0.06636	0.6535	0.0691	0.06346	0.2366	0.06095	0.3501	0.02318	0.19
591	18763	PKD1	9008	calcium channel activity	GO:0005262	molecular function	36	8	0.131	0.1441	0.06419	0.6614	0.07508	0.07844	0.2186	0.06167	0.3369	0.01953	0.211
592	18763	PKD1	9008	branching morphogenesis of an epithelial tube	GO:0048754	biological process	36	10	0.1317	0.1555	0.08305	0.6264	0.03533	0.09434	0.1839	0.0837	0.2888	0.04734	0.1457
593	18763	PKD1	9008	lung epithelium development	GO:0060428	biological process	36	5	0.1388	0.1511	0.08463	0.6152	0.07196	0.0686	0.2808	0.06607	0.3457	0.02994	0.2392
594	18763	PKD1	9008	extracellular exosome	GO:0070062	cellular component	36	24	0.1416	0.1568	0.09125	0.6112	0.0377	0.09749	0.2056	0.07853	0.3129	0.0506	0.1646
595	18763	PKD1	9008	protein binding	GO:0005515	molecular function	36	237	0.1466	0.1495	0.1009	0.5966	0.02257	0.114	0.1886	0.07544	0.2962	0.07206	0.1414
596	18763	PKD1	9008	positive regulation of transcription by RNA polymerase II	GO:0045944	biological process	36	43	0.1596	0.1528	0.108	0.5769	0.06752	0.0821	0.3101	0.06777	0.3444	0.04209	0.277
597	18763	PKD1	9008	regulation of G1/S transition of mitotic cell cycle	GO:2000045	biological process	36	5	0.1626	0.1675	0.0833	0.5921	0.1388	0.05055	0.523	0.05395	0.5198	0.01343	0.5166
598	18763	PKD1	9008	metanephric proximal tubule development	GO:0072237	biological process	36	3	0.1627	0.1528	0.1134	0.571	0.05988	0.0892	0.2967	0.06777	0.3444	0.0493	0.2608
599	18763	PKD1	9008	genitalia development	GO:0048806	biological process	36	7	0.1631	0.1588	0.1107	0.5702	0.07618	0.07745	0.3436	0.07403	0.3407	0.03913	0.3133
600	18763	PKD1	9008	metanephric ascending thin limb development	GO:0072218	biological process	36	3	0.1633	0.1546	0.1155	0.5687	0.05661	0.09157	0.2911	0.06963	0.3431	0.05292	0.2521
601	18763	PKD1	9008	digestive tract development	GO:0048565	biological process	36	5	0.1654	0.1528	0.1131	0.5672	0.0741	0.07995	0.3421	0.06777	0.3444	0.04156	0.3079
602	18763	PKD1	9008	skin development	GO:0043588	biological process	36	2	0.1662	0.1546	0.1177	0.5638	0.06312	0.08806	0.3137	0.06963	0.3431	0.05007	0.2767
603	18763	PKD1	9008	spinal cord development	GO:0021510	biological process	36	2	0.1683	0.1546	0.1204	0.5604	0.062	0.0901	0.3144	0.06963	0.3431	0.0521	0.278
604	18763	PKD1	9008	protein kinase binding	GO:0019901	molecular function	36	21	0.1732	0.1723	0.1241	0.5592	0.04666	0.1074	0.2793	0.08012	0.3707	0.06218	0.2478
605	18763	PKD1	9008	cell-cell signaling by wnt	GO:0198738	biological process	36	2	0.1811	0.1632	0.1199	0.5543	0.08628	0.08205	0.3997	0.06954	0.3828	0.03433	0.4187
606	18763	PKD1	9008	heart development	GO:0007507	biological process	36	4	0.2078	0.1772	0.1612	0.5103	0.05895	0.1171	0.3686	0.08699	0.361	0.07735	0.3358
607	18763	PKD1	9008	cartilage development	GO:0051216	biological process	36	7	0.2088	0.1778	0.1619	0.5088	0.06189	0.1145	0.3809	0.08675	0.3642	0.07529	0.3481
608	18763	PKD1	9008	positive regulation of cyclin-dependent protein serine/threonine kinase activity	GO:0045737	biological process	36	6	0.2211	0.1863	0.1765	0.496	0.05002	0.1343	0.3641	0.09647	0.3599	0.09337	0.3335
609	18763	PKD1	9008	regulation of proteasomal protein catabolic process	GO:0061136	biological process	36	6	0.222	0.2045	0.1791	0.4981	0.02491	0.1725	0.2856	0.1228	0.3406	0.1311	0.2448
610	17933	MYT1L	7623	DNA-binding transcription factor activity, RNA polymerase II-specific	GO:0000981	molecular function	4	13	0.08599	0.03893	0.01583	0.8683	0.005791	0.08287	0.08923	0.03489	0.04344	0.01416	0.01771
611	17933	MYT1L	7623	RNA polymerase II cis-regulatory region sequence-specific DNA binding	GO:0000978	molecular function	4	22	0.08599	0.03893	0.0201	0.8347	0.004659	0.08287	0.08923	0.03489	0.04344	0.01865	0.02165
612	17933	MYT1L	7623	regulation of transcription by RNA polymerase II	GO:0006357	biological process	4	42	0.08651	0.04292	0.03219	0.7648	0.01058	0.08416	0.08894	0.03588	0.05134	0.02691	0.03851
613	17933	MYT1L	7623	nucleus	GO:0005634	cellular component	4	48	0.1096	0.06098	0.06098	0.6741	0.01329	0.09409	0.1277	0.04907	0.07579	0.04907	0.07579
614	244418	PRAG1	25438	identical protein binding	GO:0042802	molecular function	9	14	0.08599	0.0478	0.01603	0.8669	0.004524	0.08287	0.08923	0.03514	0.06503	0.01471	0.01746
615	244418	PRAG1	25438	protein phosphorylation	GO:0006468	biological process	9	28	0.08599	0.05021	0.02769	0.7871	0.01863	0.08287	0.08923	0.03984	0.06328	0.02049	0.03742
616	244418	PRAG1	25438	focal adhesion	GO:0005925	cellular component	9	6	0.08926	0.04867	0.02814	0.7854	0.02917	0.08525	0.09346	0.03467	0.06831	0.01731	0.04576
617	244418	PRAG1	25438	cell migration	GO:0016477	biological process	9	38	0.09021	0.0496	0.03269	0.763	0.0209	0.07989	0.1019	0.03623	0.06792	0.02294	0.04658
618	244418	PRAG1	25438	protein kinase activity	GO:0004672	molecular function	9	29	0.09753	0.0505	0.03605	0.7502	0.04815	0.08584	0.1108	0.0359	0.07104	0.01622	0.08011
619	244418	PRAG1	25438	protein binding	GO:0005515	molecular function	9	237	0.1093	0.06045	0.05837	0.68	0.0253	0.0897	0.1332	0.04139	0.08829	0.03883	0.08773
620	72349	DUSP3	3069	cytoskeletal protein binding	GO:0008092	molecular function	29	22	0.08599	0.08006	0.00759	0.9266	0.003431	0.08287	0.08923	0.0662	0.09682	0.006432	0.008957
621	72349	DUSP3	3069	protein tyrosine kinase binding	GO:1990782	molecular function	29	3	0.08599	0.08006	0.008266	0.9206	0.00756	0.08287	0.08923	0.0662	0.09682	0.005622	0.01215
622	72349	DUSP3	3069	regulation of focal adhesion assembly	GO:0051893	biological process	29	6	0.08599	0.08006	0.0146	0.8777	0.00465	0.08287	0.08923	0.0662	0.09682	0.01317	0.01619
623	72349	DUSP3	3069	dephosphorylation	GO:0016311	biological process	29	10	0.08599	0.08006	0.0175	0.8545	0.009788	0.08287	0.08923	0.0662	0.09682	0.01475	0.02075
624	72349	DUSP3	3069	peptidyl-tyrosine dephosphorylation	GO:0035335	biological process	29	5	0.08599	0.08006	0.02065	0.8304	0.01264	0.08287	0.08923	0.0662	0.09682	0.01692	0.02519
625	72349	DUSP3	3069	receptor tyrosine kinase binding	GO:0030971	molecular function	29	4	0.08599	0.08006	0.02147	0.824	0.01011	0.08287	0.08923	0.0662	0.09682	0.01826	0.02524
626	72349	DUSP3	3069	protein tyrosine phosphatase activity	GO:0004725	molecular function	29	9	0.08599	0.08057	0.02184	0.8221	0.01271	0.08287	0.08923	0.06731	0.09645	0.01785	0.02673
627	72349	DUSP3	3069	negative regulation of MAPK cascade	GO:0043409	biological process	29	10	0.08674	0.08774	0.03117	0.7697	0.01893	0.08454	0.08899	0.06727	0.1144	0.02279	0.04265
628	72349	DUSP3	3069	protein tyrosine/serine/threonine phosphatase activity	GO:0008138	molecular function	29	4	0.08732	0.08774	0.03058	0.7726	0.0192	0.08563	0.08904	0.06727	0.1144	0.02226	0.04201
629	72349	DUSP3	3069	negative regulation of ERK1 and ERK2 cascade	GO:0070373	biological process	29	3	0.08806	0.08774	0.02978	0.7771	0.03237	0.08592	0.09025	0.06727	0.1144	0.01754	0.05055
630	72349	DUSP3	3069	MAP kinase phosphatase activity	GO:0033549	molecular function	29	6	0.09296	0.09029	0.04004	0.7342	0.02049	0.08751	0.09874	0.06758	0.1206	0.02818	0.05689
631	72349	DUSP3	3069	negative regulation of T cell activation	GO:0050868	biological process	29	11	0.09451	0.0934	0.04388	0.7213	0.006043	0.08557	0.1044	0.07977	0.1094	0.0394	0.04888
632	72349	DUSP3	3069	negative regulation of JNK cascade	GO:0046329	biological process	29	4	0.1009	0.102	0.05034	0.7014	0.02248	0.09052	0.1124	0.07061	0.1474	0.03443	0.07361
633	72349	DUSP3	3069	positive regulation of focal adhesion disassembly	GO:0120183	biological process	29	3	0.1015	0.101	0.04987	0.7021	0.02422	0.08448	0.1218	0.06989	0.1459	0.03329	0.07471
634	72349	DUSP3	3069	negative regulation of chemotaxis	GO:0050922	biological process	29	19	0.1132	0.1104	0.06402	0.6668	0.01781	0.1016	0.1262	0.07995	0.1524	0.04799	0.0854
635	72349	DUSP3	3069	immunological synapse	GO:0001772	cellular component	29	2	0.1295	0.121	0.07247	0.6452	0.05158	0.08979	0.1869	0.06566	0.2231	0.0313	0.1678
636	72349	DUSP3	3069	negative regulation of T cell receptor signaling pathway	GO:0050860	biological process	29	4	0.135	0.1324	0.08456	0.6232	0.03574	0.09507	0.1917	0.08465	0.2071	0.04926	0.1452
637	72349	DUSP3	3069	protein kinase binding	GO:0019901	molecular function	29	21	0.1404	0.1356	0.09215	0.6107	0.02452	0.1082	0.1821	0.0891	0.2063	0.06356	0.1336
638	72349	DUSP3	3069	nucleus	GO:0005634	cellular component	29	48	0.1491	0.1367	0.09924	0.5983	0.03184	0.1114	0.1997	0.08901	0.21	0.06165	0.1597
639	72349	DUSP3	3069	phosphatase activity	GO:0016791	molecular function	29	71	0.1528	0.1367	0.1033	0.5913	0.03502	0.1091	0.214	0.08901	0.21	0.06194	0.1723
640	72349	DUSP3	3069	negative regulation of cell migration	GO:0030336	biological process	29	28	0.1689	0.1466	0.1224	0.5645	0.02891	0.1262	0.2259	0.1041	0.2063	0.08171	0.1832
641	72349	DUSP3	3069	cytosol	GO:0005829	cellular component	29	32	0.1789	0.1539	0.1332	0.5512	0.02081	0.1457	0.2196	0.1136	0.2086	0.09991	0.1775
642	72349	DUSP3	3069	inactivation of MAPK activity	GO:0000188	biological process	29	7	0.1793	0.1586	0.1296	0.5534	0.03872	0.1267	0.2537	0.09996	0.2516	0.0738	0.2277
643	72349	DUSP3	3069	protein binding	GO:0005515	molecular function	29	237	0.1813	0.1532	0.1358	0.5469	0.02854	0.135	0.2434	0.1098	0.2138	0.09181	0.201
644	72349	DUSP3	3069	nucleoplasm	GO:0005654	cellular component	29	26	0.1829	0.1599	0.1374	0.5459	0.02081	0.1503	0.2226	0.1185	0.2159	0.1026	0.184
645	72349	DUSP3	3069	positive regulation of mitotic cell cycle	GO:0045931	biological process	29	10	0.2207	0.1843	0.1774	0.5005	0.01832	0.1831	0.2659	0.1474	0.2305	0.1406	0.2239
646	72349	DUSP3	3069	cellular response to epidermal growth factor stimulus	GO:0071364	biological process	29	4	0.271	0.2328	0.2299	0.4484	0.03272	0.2014	0.3645	0.1599	0.3388	0.1541	0.3429
647	20442	ST3GAL1	10862	Golgi trans cisterna membrane	GO:1990676	cellular component	9	2	0.1033	0.1044	0.05207	0.6961	0.02814	0.08829	0.1208	0.06583	0.1656	0.03254	0.08333
648	20442	ST3GAL1	10862	Golgi medial cisterna membrane	GO:1990675	cellular component	9	2	0.1042	0.1044	0.05286	0.694	0.03011	0.08877	0.1224	0.06583	0.1656	0.03192	0.08752
649	20442	ST3GAL1	10862	membrane	GO:0016020	cellular component	9	35	0.1072	0.1044	0.05649	0.6849	0.0223	0.09018	0.1275	0.06583	0.1656	0.03933	0.08113
650	20442	ST3GAL1	10862	beta-galactoside (CMP) alpha-2,3-sialyltransferase activity	GO:0003836	molecular function	9	2	0.1229	0.1046	0.06963	0.6514	0.04538	0.08476	0.1783	0.06576	0.1663	0.03392	0.143
651	20442	ST3GAL1	10862	extracellular exosome	GO:0070062	cellular component	9	24	0.1241	0.1044	0.07536	0.6419	0.02325	0.1056	0.1459	0.06583	0.1656	0.05191	0.1094
652	20442	ST3GAL1	10862	trans-Golgi network membrane	GO:0032588	cellular component	9	3	0.1308	0.1083	0.08295	0.6279	0.0136	0.1204	0.1421	0.07273	0.1614	0.06694	0.1028
653	20442	ST3GAL1	10862	protein sialylation	GO:1990743	biological process	9	3	0.1311	0.1046	0.07973	0.6326	0.03445	0.1007	0.1707	0.06576	0.1663	0.04634	0.1372
654	20442	ST3GAL1	10862	ganglioside biosynthetic process via lactosylceramide	GO:0010706	biological process	9	2	0.2617	0.2212	0.2212	0.4574	0.02481	0.2087	0.3281	0.1639	0.2986	0.1639	0.2986
655	54561	NAP1L3	7639	histone binding	GO:0042393	molecular function	6	9	0.08599	0.0214	0.004021	0.9451	0.01102	0.08287	0.08923	0.009837	0.04656	0.001572	0.01028
656	54561	NAP1L3	7639	chromatin	GO:0000785	cellular component	6	10	0.08599	0.04034	0.0213	0.8257	0.01786	0.08287	0.08923	0.0347	0.0469	0.01605	0.02828
657	54561	NAP1L3	7639	nucleosome assembly	GO:0006334	biological process	6	9	0.08604	0.04034	0.02313	0.8134	0.012	0.08284	0.08936	0.0347	0.0469	0.01915	0.02792
658	54561	NAP1L3	7639	nucleus	GO:0005634	cellular component	6	48	0.08683	0.04319	0.03295	0.7616	0.005772	0.08388	0.08987	0.03431	0.05437	0.02987	0.03633
659	54561	NAP1L3	7639	protein binding	GO:0005515	molecular function	6	237	0.09491	0.04859	0.04303	0.724	0.01331	0.08601	0.1047	0.03456	0.06831	0.03427	0.05402
660	54561	NAP1L3	7639	chromatin binding	GO:0003682	molecular function	6	8	0.1444	0.08789	0.0794	0.6285	0.06911	0.08666	0.2405	0.03532	0.2187	0.02615	0.2411
661	20564	SLIT3	11087	axon guidance	GO:0007411	biological process	13	24	0.1442	0.3902	0.09821	0.6018	0.01177	0.1251	0.1662	0.2695	0.5649	0.0819	0.1178
662	20564	SLIT3	11087	apoptotic process involved in luteolysis	GO:0061364	biological process	13	5	0.1484	0.3902	0.1032	0.5942	0.006414	0.136	0.1619	0.2695	0.5649	0.0937	0.1136
663	20564	SLIT3	11087	Roundabout signaling pathway	GO:0035385	biological process	13	5	0.1744	0.3902	0.1272	0.5557	0.04284	0.1125	0.2705	0.2695	0.5649	0.06922	0.2337
664	20564	SLIT3	11087	response to cortisol	GO:0051414	biological process	13	6	0.2374	0.3902	0.1951	0.4811	0.02997	0.1782	0.3162	0.2695	0.5649	0.1344	0.2833
665	20564	SLIT3	11087	axon extension involved in axon guidance	GO:0048846	biological process	13	4	0.238	0.3902	0.1948	0.4817	0.0286	0.1827	0.3101	0.2695	0.5649	0.1353	0.2804
666	20564	SLIT3	11087	heparin binding	GO:0008201	molecular function	13	6	0.2974	0.3902	0.2604	0.4228	0.03083	0.2244	0.3942	0.2695	0.5649	0.1818	0.3731
667	20564	SLIT3	11087	cellular response to hormone stimulus	GO:0032870	biological process	13	20	0.307	0.3902	0.2694	0.4141	0.03893	0.2158	0.4367	0.2695	0.5649	0.1719	0.4221
668	20564	SLIT3	11087	Roundabout binding	GO:0048495	molecular function	13	3	0.3272	0.4034	0.2914	0.3954	0.04524	0.2179	0.4912	0.2652	0.6137	0.1765	0.481
669	20564	SLIT3	11087	extracellular space	GO:0005615	cellular component	13	17	0.3578	0.4519	0.3279	0.3732	0.01947	0.2993	0.4277	0.399	0.5119	0.2675	0.4019
670	20564	SLIT3	11087	negative chemotaxis	GO:0050919	biological process	13	13	0.4164	0.4682	0.3889	0.3297	0.03548	0.3123	0.5552	0.3501	0.6263	0.2781	0.5439
671	20564	SLIT3	11087	negative regulation of chemokine-mediated signaling pathway	GO:0070100	biological process	13	5	0.4773	0.4842	0.4575	0.2866	0.0351	0.3661	0.6223	0.3734	0.6277	0.3426	0.611
672	20564	SLIT3	11087	negative regulation of cell growth	GO:0030308	biological process	13	16	0.5433	0.5278	0.5278	0.2465	0.02883	0.4404	0.6701	0.4186	0.6654	0.4186	0.6654
673	98170	TMEM132A	31092	endoplasmic reticulum	GO:0005783	cellular component	6	18	0.08599	0.03106	0.02311	0.8137	0.02448	0.08287	0.08923	0.02778	0.03472	0.0155	0.03445
674	98170	TMEM132A	31092	Golgi apparatus	GO:0005794	cellular component	6	12	0.08599	0.03106	0.02353	0.8104	0.01665	0.08287	0.08923	0.02778	0.03472	0.01796	0.03082
675	98170	TMEM132A	31092	extracellular exosome	GO:0070062	cellular component	6	24	0.08639	0.03168	0.03066	0.7717	0.002878	0.08258	0.09037	0.02943	0.03411	0.02918	0.03221
676	50786	HS6ST2	19133	heparan sulfate proteoglycan biosynthetic process, enzymatic modification	GO:0015015	biological process	3	2	0.2704	0.2376	0.2278	0.4445	0.05706	0.1587	0.461	0.1253	0.4506	0.1145	0.4534
677	50786	HS6ST2	19133	heparan sulfate 6-O-sulfotransferase activity	GO:0017095	molecular function	3	2	0.2789	0.2376	0.2371	0.4374	0.05345	0.17	0.4577	0.1253	0.4506	0.1254	0.4483
678	52389	ADGRA1	13838	cell surface receptor signaling pathway	GO:0007166	biological process	4	31	0.08599	0.03826	0.01049	0.9046	0.01065	0.08287	0.08923	0.0277	0.05285	0.007085	0.01553
679	52389	ADGRA1	13838	glutamatergic synapse	GO:0098978	cellular component	4	5	0.08599	0.04133	0.02616	0.7954	0.01845	0.08287	0.08923	0.03352	0.05096	0.0194	0.03527
680	52389	ADGRA1	13838	postsynaptic density	GO:0014069	cellular component	4	3	0.0871	0.04133	0.03203	0.7655	0.01602	0.08335	0.09103	0.03352	0.05096	0.02445	0.04196
681	52389	ADGRA1	13838	plasma membrane	GO:0005886	cellular component	4	52	0.09702	0.04663	0.04663	0.7125	0.01471	0.09219	0.1021	0.03628	0.05995	0.03628	0.05995
682	11307	ABCG1	73	phosphatidylcholine floppase activity	GO:0090554	molecular function	26	3	0.1122	0.2705	0.06439	0.6656	0.01726	0.09289	0.1355	0.1858	0.3936	0.04877	0.08501
683	11307	ABCG1	73	floppase activity	GO:0140328	molecular function	26	9	0.1136	0.2705	0.06559	0.6631	0.02113	0.09179	0.1406	0.1858	0.3936	0.04677	0.09199
684	11307	ABCG1	73	response to organic substance	GO:0010033	biological process	26	54	0.1156	0.2705	0.05992	0.6743	0.04744	0.08373	0.1595	0.1858	0.3936	0.02728	0.1316
685	11307	ABCG1	73	toxin transmembrane transporter activity	GO:0019534	molecular function	26	3	0.1163	0.2705	0.06778	0.6572	0.02992	0.08793	0.1539	0.1858	0.3936	0.04153	0.1106
686	11307	ABCG1	73	response to lipid	GO:0033993	biological process	26	40	0.1376	0.2705	0.08941	0.6157	0.02305	0.1107	0.171	0.1858	0.3936	0.06294	0.127
687	11307	ABCG1	73	intracellular cholesterol transport	GO:0032367	biological process	26	4	0.1562	0.2705	0.1099	0.5829	0.02455	0.1224	0.1994	0.1858	0.3936	0.07603	0.1588
688	11307	ABCG1	73	cholesterol transfer activity	GO:0120020	molecular function	26	2	0.1656	0.2705	0.1189	0.5688	0.03426	0.1161	0.2362	0.1858	0.3936	0.07159	0.1974
689	11307	ABCG1	73	cholesterol homeostasis	GO:0042632	biological process	26	2	0.177	0.2705	0.1316	0.5539	0.01389	0.1539	0.2035	0.1858	0.3936	0.1079	0.1605
690	11307	ABCG1	73	glycoprotein transport	GO:0034436	biological process	26	3	0.1821	0.2742	0.1342	0.5442	0.05357	0.1081	0.3069	0.1857	0.4049	0.0642	0.2804
691	11307	ABCG1	73	protein heterodimerization activity	GO:0046982	molecular function	26	3	0.1835	0.2705	0.1364	0.543	0.04619	0.1149	0.2929	0.1858	0.3936	0.07241	0.257
692	11307	ABCG1	73	cholesterol metabolic process	GO:0008203	biological process	26	7	0.19	0.2705	0.1389	0.5353	0.06401	0.1016	0.3555	0.1858	0.3936	0.05488	0.3517
693	11307	ABCG1	73	Golgi apparatus	GO:0005794	cellular component	26	12	0.1925	0.2705	0.1478	0.533	0.02343	0.1528	0.2425	0.1858	0.3936	0.1066	0.2048
694	11307	ABCG1	73	phospholipid homeostasis	GO:0055091	biological process	26	2	0.1985	0.2705	0.1537	0.5258	0.02423	0.1583	0.2489	0.1858	0.3936	0.1113	0.2123
695	11307	ABCG1	73	plasma membrane	GO:0005886	cellular component	26	52	0.2048	0.2705	0.1604	0.5189	0.01821	0.1701	0.2466	0.1858	0.3936	0.1258	0.2047
696	11307	ABCG1	73	ABC-type sterol transporter activity	GO:0034041	molecular function	26	5	0.2055	0.2753	0.1557	0.5133	0.06937	0.1033	0.4087	0.1859	0.4076	0.05859	0.4137
697	11307	ABCG1	73	positive regulation of amyloid-beta formation	GO:1902004	biological process	26	4	0.2074	0.2779	0.1629	0.5145	0.03066	0.1504	0.2859	0.2014	0.3835	0.1082	0.2452
698	11307	ABCG1	73	mitochondrion	GO:0005739	cellular component	26	12	0.2084	0.2705	0.1639	0.5137	0.02756	0.1582	0.2745	0.1858	0.3936	0.1127	0.2385
699	11307	ABCG1	73	ADP binding	GO:0043531	molecular function	26	3	0.2205	0.2705	0.177	0.501	0.01656	0.1878	0.2589	0.1858	0.3936	0.1424	0.2199
700	11307	ABCG1	73	protein homodimerization activity	GO:0042803	molecular function	26	10	0.2307	0.2705	0.1874	0.4893	0.0258	0.1802	0.2954	0.1858	0.3936	0.1346	0.261
701	11307	ABCG1	73	cholesterol efflux	GO:0033344	biological process	26	2	0.2558	0.2742	0.2135	0.4626	0.0355	0.1839	0.3557	0.1857	0.4049	0.1369	0.333
702	11307	ABCG1	73	protein binding	GO:0005515	molecular function	26	237	0.2656	0.2818	0.226	0.4531	0.0245	0.2121	0.3327	0.2013	0.3945	0.1678	0.3043
703	11307	ABCG1	73	phospholipid efflux	GO:0033700	biological process	26	2	0.2697	0.2884	0.2267	0.4462	0.05389	0.1617	0.4499	0.1854	0.4487	0.1158	0.444
704	11307	ABCG1	73	ATP binding	GO:0005524	molecular function	26	4	0.3907	0.3981	0.362	0.3485	0.02976	0.3027	0.5042	0.3053	0.5192	0.2722	0.4814
705	11307	ABCG1	73	amyloid precursor protein catabolic process	GO:0042987	biological process	26	3	0.4413	0.4289	0.4117	0.3092	0.0547	0.2817	0.6911	0.2725	0.6749	0.2415	0.7019
706	11307	ABCG1	73	positive regulation of protein secretion	GO:0050714	biological process	26	15	0.4514	0.4536	0.4253	0.3048	0.04207	0.3213	0.6343	0.3361	0.6123	0.2851	0.6344
707	11307	ABCG1	73	external side of plasma membrane	GO:0009897	cellular component	26	5	0.4606	0.4611	0.4374	0.3005	0.02709	0.3704	0.5729	0.3548	0.5992	0.3403	0.5621
708	67943	MESD	13520	low-density lipoprotein particle receptor binding	GO:0050750	molecular function	5	2	0.3767	0.7025	0.3373	0.3525	0.07242	0.2025	0.701	0.5814	0.8488	0.1554	0.7321
709	67943	MESD	13520	endoplasmic reticulum	GO:0005783	cellular component	5	18	0.4115	0.7025	0.3844	0.3343	0.02545	0.337	0.5025	0.5814	0.8488	0.303	0.4878
710	67943	MESD	13520	protein folding	GO:0006457	biological process	5	9	0.5761	0.7025	0.5551	0.2175	0.064	0.3795	0.8745	0.5814	0.8488	0.3494	0.8818
711	67943	MESD	13520	protein binding	GO:0005515	molecular function	5	237	0.5884	0.7025	0.5761	0.222	0.003046	0.5744	0.6028	0.5814	0.8488	0.5632	0.5893
712	67943	MESD	13520	ossification	GO:0001503	biological process	5	8	0.6686	0.7065	0.6551	0.1691	0.04408	0.5081	0.8799	0.5839	0.8548	0.4865	0.8823
713	19647	RBBP6	9889	ubiquitin-dependent protein catabolic process	GO:0006511	biological process	12	7	0.08599	0.1121	0.02526	0.8005	0.02249	0.08287	0.08923	0.09235	0.1361	0.01747	0.03653
714	19647	RBBP6	9889	regulation of DNA replication	GO:0006275	biological process	12	5	0.08988	0.1121	0.03744	0.7437	0.01567	0.08319	0.09711	0.09235	0.1361	0.02854	0.04911
715	19647	RBBP6	9889	ubiquitin protein ligase activity	GO:0061630	molecular function	12	7	0.09052	0.1121	0.03924	0.7367	0.00621	0.08452	0.09693	0.09235	0.1361	0.03529	0.04364
716	19647	RBBP6	9889	ubiquitin-protein transferase activity	GO:0004842	molecular function	12	8	0.1033	0.1121	0.04995	0.7019	0.0354	0.08701	0.1226	0.09235	0.1361	0.02757	0.09049
717	19647	RBBP6	9889	centrosome	GO:0005813	cellular component	12	9	0.1107	0.1121	0.0626	0.6705	0.002623	0.1033	0.1187	0.09235	0.1361	0.05989	0.06544
718	19647	RBBP6	9889	RNA binding	GO:0003723	molecular function	12	43	0.1135	0.1121	0.06397	0.6669	0.01833	0.1026	0.1255	0.09235	0.1361	0.04756	0.08604
719	19647	RBBP6	9889	protein binding	GO:0005515	molecular function	12	237	0.12	0.1121	0.07219	0.6492	0.006567	0.1094	0.1316	0.09235	0.1361	0.06506	0.0801
720	19647	RBBP6	9889	cellular response to DNA damage stimulus	GO:0006974	biological process	12	12	0.1323	0.1153	0.0845	0.625	0.01302	0.1223	0.1432	0.09253	0.1437	0.06885	0.1037
721	19647	RBBP6	9889	protein kinase binding	GO:0019901	molecular function	12	21	0.1537	0.1252	0.106	0.5892	0.01677	0.1342	0.1761	0.09217	0.1701	0.08222	0.1366
722	19647	RBBP6	9889	nuclear speck	GO:0016607	cellular component	12	6	0.1713	0.136	0.1236	0.5631	0.02634	0.1345	0.2182	0.09223	0.2006	0.08384	0.1823
723	19647	RBBP6	9889	protein-containing complex	GO:0032991	cellular component	12	345	0.3043	0.2685	0.2685	0.4183	0.01385	0.2645	0.3502	0.2294	0.3142	0.2294	0.3142
724	74132	RNF6	10069	ubiquitin-dependent protein catabolic process	GO:0006511	biological process	17	7	0.08599	0.05529	0.01619	0.8597	0.02602	0.08287	0.08923	0.04109	0.07438	0.01021	0.02566
725	74132	RNF6	10069	intracellular membrane-bounded organelle	GO:0043231	cellular component	17	39	0.08599	0.05529	0.01951	0.8366	0.01915	0.08287	0.08923	0.04109	0.07438	0.01402	0.02715
726	74132	RNF6	10069	regulation of transcription, DNA-templated	GO:0006355	biological process	17	28	0.08599	0.05529	0.02144	0.8247	0.00579	0.08287	0.08923	0.04109	0.07438	0.01961	0.02344
727	74132	RNF6	10069	ubiquitin protein ligase activity	GO:0061630	molecular function	17	7	0.08599	0.05529	0.02448	0.8059	0.02055	0.08287	0.08923	0.04109	0.07438	0.01756	0.03414
728	74132	RNF6	10069	androgen receptor binding	GO:0050681	molecular function	17	3	0.08599	0.05529	0.02472	0.8035	0.02685	0.08287	0.08923	0.04109	0.07438	0.01597	0.03828
729	74132	RNF6	10069	positive regulation of transcription, DNA-templated	GO:0045893	biological process	17	28	0.08599	0.05529	0.02718	0.7889	0.00868	0.08287	0.08923	0.04109	0.07438	0.02348	0.03146
730	74132	RNF6	10069	protein K6-linked ubiquitination	GO:0085020	biological process	17	2	0.08616	0.05529	0.03166	0.767	0.009578	0.08315	0.08928	0.04109	0.07438	0.02694	0.03722
731	74132	RNF6	10069	protein K27-linked ubiquitination	GO:0044314	biological process	17	2	0.08675	0.05529	0.03241	0.7639	0.01302	0.08375	0.08986	0.04109	0.07438	0.02603	0.04035
732	74132	RNF6	10069	nucleus	GO:0005634	cellular component	17	48	0.08936	0.05529	0.03341	0.76	0.02364	0.08226	0.09709	0.04109	0.07438	0.02231	0.05003
733	74132	RNF6	10069	ubiquitin-protein transferase activity	GO:0004842	molecular function	17	8	0.08964	0.05529	0.02825	0.7849	0.03888	0.08206	0.09792	0.04109	0.07438	0.01481	0.05388
734	74132	RNF6	10069	nucleoplasm	GO:0005654	cellular component	17	26	0.09457	0.05786	0.04262	0.725	0.02423	0.08167	0.1095	0.04394	0.07619	0.02828	0.06422
735	74132	RNF6	10069	regulation of androgen receptor signaling pathway	GO:0060765	biological process	17	3	0.09734	0.05916	0.04769	0.7098	0.006071	0.08988	0.1054	0.04759	0.07354	0.04289	0.05302
736	74132	RNF6	10069	protein ubiquitination	GO:0016567	biological process	17	10	0.09802	0.05893	0.04686	0.7113	0.02075	0.08634	0.1113	0.0456	0.07617	0.03304	0.06648
737	74132	RNF6	10069	protein binding	GO:0005515	molecular function	17	237	0.1032	0.06254	0.05361	0.6926	0.01182	0.09884	0.1077	0.04959	0.07887	0.04394	0.06542
738	74132	RNF6	10069	cytoplasm	GO:0005737	cellular component	17	35	0.1137	0.06678	0.06336	0.6677	0.02455	0.09765	0.1324	0.04901	0.091	0.04238	0.09473
739	74132	RNF6	10069	nuclear membrane	GO:0031965	cellular component	17	7	0.1175	0.07222	0.06987	0.6539	0.0118	0.107	0.1292	0.0596	0.08752	0.058	0.08418
740	22145	TUBA4A	12407	cytoskeleton	GO:0005856	cellular component	17	12	0.08599	0.06068	0.01379	0.882	0.01168	0.08287	0.08923	0.05192	0.07092	0.01066	0.01786
741	22145	TUBA4A	12407	mitotic cell cycle	GO:0000278	biological process	17	7	0.08599	0.06068	0.02035	0.8331	0.00346	0.08287	0.08923	0.05192	0.07092	0.0193	0.02147
742	22145	TUBA4A	12407	structural constituent of cytoskeleton	GO:0005200	molecular function	17	5	0.08599	0.06068	0.02134	0.8246	0.01378	0.08287	0.08923	0.05192	0.07092	0.01715	0.02656
743	22145	TUBA4A	12407	microtubule cytoskeleton	GO:0015630	cellular component	17	3	0.08599	0.06068	0.02532	0.7999	0.01261	0.08287	0.08923	0.05192	0.07092	0.02071	0.03096
744	22145	TUBA4A	12407	microtubule cytoskeleton organization	GO:0000226	biological process	17	22	0.08699	0.06068	0.02328	0.8128	0.02581	0.0821	0.09216	0.05192	0.07092	0.01526	0.03552
745	22145	TUBA4A	12407	extracellular exosome	GO:0070062	cellular component	17	24	0.09095	0.06809	0.03917	0.7372	0.01236	0.08861	0.09336	0.06309	0.07349	0.0317	0.04839
746	22145	TUBA4A	12407	protein kinase binding	GO:0019901	molecular function	17	21	0.1018	0.07175	0.05188	0.6979	0.01111	0.09415	0.11	0.06983	0.07373	0.04323	0.06225
747	22145	TUBA4A	12407	protein binding	GO:0005515	molecular function	17	237	0.1142	0.07608	0.06568	0.663	0.01446	0.1049	0.1244	0.06613	0.08754	0.05189	0.08312
748	22145	TUBA4A	12407	microtubule	GO:0005874	cellular component	17	10	0.118	0.08581	0.06772	0.6569	0.03395	0.08653	0.1609	0.06391	0.1152	0.03878	0.1183
749	22145	TUBA4A	12407	cytoplasm	GO:0005737	cellular component	17	35	0.1188	0.08329	0.0716	0.6504	0.005149	0.1085	0.13	0.07012	0.09894	0.06595	0.07774
750	22145	TUBA4A	12407	GTP binding	GO:0005525	molecular function	17	5	0.1415	0.1014	0.09119	0.6101	0.04588	0.08994	0.2228	0.06025	0.1707	0.04519	0.184
751	18430	OXTR	8529	G protein-coupled receptor signaling pathway	GO:0007186	biological process	10	44	0.08599	0.08352	0.01144	0.8732	0.03226	0.08287	0.08923	0.03651	0.1911	0.003718	0.03518
752	18430	OXTR	8529	integral component of plasma membrane	GO:0005887	cellular component	10	31	0.08929	0.1204	0.03659	0.7467	0.01136	0.08581	0.09292	0.08289	0.1749	0.03015	0.04441
753	18430	OXTR	8529	peptide binding	GO:0042277	molecular function	10	14	0.0948	0.1097	0.03169	0.7685	0.04844	0.07813	0.115	0.08007	0.1502	0.0142	0.07073
754	18430	OXTR	8529	regulation of systemic arterial blood pressure by vasopressin	GO:0001992	biological process	10	2	0.122	0.1287	0.06691	0.6566	0.04945	0.07878	0.189	0.08147	0.2033	0.03085	0.1451
755	18430	OXTR	8529	female pregnancy	GO:0007565	biological process	10	3	0.1298	0.1287	0.07781	0.635	0.04263	0.08709	0.1935	0.08147	0.2033	0.04054	0.1493
756	18430	OXTR	8529	G protein-coupled receptor activity	GO:0004930	molecular function	10	50	0.141	0.1452	0.09021	0.6117	0.04306	0.09586	0.2073	0.08283	0.2544	0.04743	0.1716
757	18430	OXTR	8529	maternal process involved in parturition	GO:0060137	biological process	10	2	0.1481	0.1318	0.09764	0.6004	0.03668	0.1056	0.2079	0.08235	0.2109	0.05644	0.1689
758	18430	OXTR	8529	vasopressin receptor activity	GO:0005000	molecular function	10	2	0.1782	0.1452	0.1282	0.5548	0.04035	0.124	0.2561	0.08283	0.2544	0.07197	0.2285
759	18430	OXTR	8529	oxytocin receptor activity	GO:0004990	molecular function	10	2	0.179	0.1452	0.1286	0.5541	0.04145	0.1234	0.2597	0.08283	0.2544	0.07109	0.2328
760	18430	OXTR	8529	positive regulation of vasoconstriction	GO:0045907	biological process	10	4	0.2533	0.2175	0.2006	0.4549	0.09587	0.1092	0.5875	0.07579	0.6241	0.06851	0.5871
761	239099	HOMEZ	20164	DNA-binding transcription factor activity, RNA polymerase II-specific	GO:0000981	molecular function	7	13	0.08599	0.05006	0.01973	0.8364	0.01181	0.08287	0.08923	0.03766	0.06655	0.01638	0.02378
762	239099	HOMEZ	20164	regulation of transcription by RNA polymerase II	GO:0006357	biological process	7	42	0.08656	0.05006	0.03137	0.7686	0.001081	0.08299	0.09027	0.03766	0.06655	0.03082	0.03192
763	239099	HOMEZ	20164	nucleolus	GO:0005730	cellular component	7	4	0.09035	0.05006	0.03454	0.7549	0.01629	0.08432	0.0968	0.03766	0.06655	0.02626	0.04543
764	239099	HOMEZ	20164	nucleus	GO:0005634	cellular component	7	48	0.09068	0.05006	0.03346	0.7599	0.02233	0.07902	0.1041	0.03766	0.06655	0.02282	0.04906
765	239099	HOMEZ	20164	nucleoplasm	GO:0005654	cellular component	7	26	0.09212	0.05006	0.03832	0.74	0.02378	0.07785	0.109	0.03766	0.06655	0.02559	0.05738
766	239099	HOMEZ	20164	cytosol	GO:0005829	cellular component	7	32	0.1042	0.05435	0.05435	0.69	0.02469	0.08137	0.1335	0.03625	0.08148	0.03625	0.08148
767	18573	PDE1A	8774	neuronal cell body	GO:0043025	cellular component	4	6	0.1955	0.4193	0.1482	0.5244	0.0617	0.1065	0.3589	0.2641	0.6657	0.0671	0.3272
768	18573	PDE1A	8774	signal transduction	GO:0007165	biological process	4	46	0.2971	0.5172	0.2586	0.4229	0.03892	0.2039	0.433	0.3273	0.8172	0.1637	0.4086
769	18573	PDE1A	8774	calcium- and calmodulin-regulated 3',5'-cyclic-GMP phosphodiesterase activity	GO:0048101	molecular function	4	2	0.6144	0.7047	0.6007	0.197	0.05122	0.4538	0.832	0.5518	0.9	0.4363	0.8271
770	18573	PDE1A	8774	3',5'-cyclic-nucleotide phosphodiesterase activity	GO:0004114	molecular function	4	8	0.7163	0.7078	0.7078	0.1363	0.04611	0.5653	0.9075	0.5549	0.9027	0.5549	0.9027
771	68027	TMEM178A	28517	membrane	GO:0016020	cellular component	4	35	0.1048	0.1389	0.05513	0.6886	0.01236	0.1005	0.1092	0.1074	0.1797	0.04479	0.06785
772	68027	TMEM178A	28517	regulation of cytosolic calcium ion concentration	GO:0051480	biological process	4	7	0.1221	0.1288	0.05889	0.6713	0.0772	0.06419	0.2322	0.08556	0.1939	0.01778	0.195
773	68027	TMEM178A	28517	endoplasmic reticulum membrane	GO:0005789	cellular component	4	5	0.2034	0.1911	0.1591	0.5196	0.02411	0.1626	0.2545	0.1871	0.1952	0.1145	0.221
774	68027	TMEM178A	28517	negative regulation of osteoclast differentiation	GO:0045671	biological process	4	4	0.2081	0.1802	0.1637	0.5149	0.02149	0.1683	0.2573	0.1625	0.1997	0.1225	0.2188
775	58188	VSTM2B	33595	integral component of membrane	GO:0016021	cellular component	1	18	0.08599	0.01847	0.01847	0.8459	0.01544	0.08287	0.08923	0.01437	0.02373	0.01437	0.02373
776	16180	IL1RAP	5995	membrane	GO:0016020	cellular component	7	35	0.08615	0.09751	0.02438	0.8051	0.01706	0.08276	0.08968	0.07408	0.1283	0.01852	0.03209
777	16180	IL1RAP	5995	positive regulation of NF-kappaB transcription factor activity	GO:0051092	biological process	7	2	0.1772	0.1844	0.1316	0.5544	0.006416	0.1673	0.1876	0.1565	0.2173	0.1201	0.1441
778	16180	IL1RAP	5995	interleukin-1 receptor activity	GO:0004908	molecular function	7	4	0.2002	0.1844	0.1556	0.5236	0.0249	0.1563	0.2565	0.1565	0.2173	0.1123	0.2154
779	16180	IL1RAP	5995	interleukin-1 receptor binding	GO:0005149	molecular function	7	5	0.2289	0.1901	0.1868	0.4913	0.01048	0.2039	0.257	0.1621	0.223	0.1636	0.2133
780	69675	PXDN	14966	bromide peroxidase activity	GO:0019806	molecular function	11	2	0.08639	0.1654	0.02512	0.8013	0.02377	0.08387	0.08899	0.1358	0.2013	0.01708	0.03692
781	69675	PXDN	14966	collagen fibril organization	GO:0030199	biological process	11	4	0.09276	0.1654	0.03707	0.7449	0.02695	0.08371	0.1028	0.1358	0.2013	0.02353	0.0584
782	69675	PXDN	14966	collagen-containing extracellular matrix	GO:0062023	cellular component	11	14	0.09593	0.1692	0.04536	0.7164	0.00899	0.09228	0.09972	0.1405	0.2037	0.03885	0.05296
783	69675	PXDN	14966	extracellular matrix structural constituent	GO:0005201	molecular function	11	9	0.1251	0.1735	0.07809	0.637	0.01711	0.1038	0.1508	0.1487	0.2024	0.05951	0.1025
784	69675	PXDN	14966	extracellular matrix organization	GO:0030198	biological process	11	15	0.135	0.1834	0.08926	0.6168	0.002274	0.1329	0.1372	0.1551	0.2169	0.08616	0.09246
785	69675	PXDN	14966	peroxidase activity	GO:0004601	molecular function	11	19	0.1564	0.2002	0.108	0.5861	0.01891	0.1335	0.1832	0.1552	0.2582	0.08111	0.1439
786	69675	PXDN	14966	hydrogen peroxide catabolic process	GO:0042744	biological process	11	4	0.2036	0.2205	0.1514	0.5208	0.06188	0.1146	0.3619	0.1482	0.3279	0.06646	0.3448
787	69675	PXDN	14966	heme binding	GO:0020037	molecular function	11	2	0.2421	0.2346	0.1995	0.4772	0.02866	0.1831	0.32	0.1744	0.3155	0.1412	0.2819
788	69675	PXDN	14966	extracellular space	GO:0005615	cellular component	11	17	0.2528	0.2346	0.2107	0.466	0.03116	0.1889	0.3382	0.1744	0.3155	0.1449	0.3065
789	69675	PXDN	14966	endoplasmic reticulum	GO:0005783	cellular component	11	18	0.2691	0.2552	0.2285	0.4507	0.02658	0.2124	0.3408	0.1867	0.3488	0.1656	0.3153
790	69675	PXDN	14966	extracellular exosome	GO:0070062	cellular component	11	24	0.2697	0.2436	0.2297	0.4503	0.01883	0.2242	0.3244	0.1907	0.3111	0.1842	0.2863
791	108077	SKIV2L	10898	RNA catabolic process	GO:0006401	biological process	5	12	0.3293	0.6957	0.2955	0.3956	0.02983	0.2525	0.4294	0.5896	0.8209	0.2164	0.4035
792	108077	SKIV2L	10898	nuclear-transcribed mRNA catabolic process, 3'-5' exonucleolytic nonsense-mediated decay	GO:0070478	biological process	5	3	0.4704	0.6957	0.4504	0.2935	0.02061	0.3989	0.5548	0.5896	0.8209	0.3776	0.5372
793	108077	SKIV2L	10898	protein binding	GO:0005515	molecular function	5	237	0.5299	0.6957	0.5138	0.2543	0.03018	0.4204	0.668	0.5896	0.8209	0.4007	0.6589
794	108077	SKIV2L	10898	Ski complex	GO:0055087	cellular component	5	2	0.5569	0.6957	0.5417	0.2404	0.01771	0.4871	0.6367	0.5896	0.8209	0.4709	0.6232
795	108077	SKIV2L	10898	RNA helicase activity	GO:0003724	molecular function	5	5	0.8152	0.8105	0.8105	0.08655	0.0001374	0.8138	0.8166	0.8099	0.811	0.8099	0.811
796	27981	RSRP1	25234	protein binding	GO:0005515	molecular function	1	237	0.2325	0.1905	0.1905	0.4875	0.01204	0.2032	0.2661	0.1637	0.2218	0.1637	0.2218
797	27387	SH2D3C	16884	positive regulation of peptidyl-serine phosphorylation	GO:0033138	biological process	2	4	0.2425	0.2524	0.2009	0.477	0.0182	0.2047	0.2874	0.2462	0.2587	0.1604	0.2515
798	27387	SH2D3C	16884	protein binding	GO:0005515	molecular function	2	237	0.2747	0.2524	0.2371	0.4444	0.01218	0.2452	0.3078	0.2462	0.2587	0.2048	0.2745
799	18710	PIK3R3	8981	cell migration involved in sprouting angiogenesis	GO:0002042	biological process	16	3	0.08599	0.04392	0.009688	0.9126	0.005958	0.08287	0.08923	0.03875	0.04978	0.007601	0.01235
800	18710	PIK3R3	8981	protein kinase B signaling	GO:0043491	biological process	16	2	0.08599	0.04392	0.01647	0.8578	0.01985	0.08287	0.08923	0.03875	0.04978	0.01109	0.02445
801	18710	PIK3R3	8981	protein binding	GO:0005515	molecular function	16	237	0.08599	0.04392	0.02072	0.8283	0.02099	0.08287	0.08923	0.03875	0.04978	0.0146	0.0294
802	18710	PIK3R3	8981	regulation of phosphatidylinositol 3-kinase activity	GO:0043551	biological process	16	5	0.08599	0.04392	0.02547	0.7985	0.005737	0.08287	0.08923	0.03875	0.04978	0.02323	0.02793
803	18710	PIK3R3	8981	positive regulation of protein phosphorylation	GO:0001934	biological process	16	16	0.08599	0.04392	0.0279	0.7848	0.002038	0.08287	0.08923	0.03875	0.04978	0.02699	0.02885
804	18710	PIK3R3	8981	insulin receptor signaling pathway	GO:0008286	biological process	16	5	0.08687	0.04392	0.0266	0.7926	0.01702	0.0822	0.09182	0.03875	0.04978	0.02004	0.03529
805	18710	PIK3R3	8981	1-phosphatidylinositol-3-kinase regulator activity	GO:0046935	molecular function	16	2	0.08691	0.04392	0.02915	0.7794	0.01602	0.08319	0.09081	0.03875	0.04978	0.02238	0.03795
806	18710	PIK3R3	8981	phosphotyrosine residue binding	GO:0001784	molecular function	16	2	0.0912	0.04471	0.03477	0.7542	0.02358	0.07907	0.1052	0.03828	0.05221	0.02327	0.05196
807	18710	PIK3R3	8981	positive regulation of gene expression	GO:0010628	biological process	16	15	0.09134	0.04691	0.04012	0.7337	0.007778	0.08164	0.1022	0.04358	0.0505	0.03503	0.04594
808	18710	PIK3R3	8981	phosphatidylinositol phosphorylation	GO:0046854	biological process	16	3	0.0952	0.05076	0.04474	0.7183	0.007519	0.08957	0.1012	0.04535	0.05682	0.03923	0.05102
809	18710	PIK3R3	8981	phosphatidylinositol 3-kinase complex	GO:0005942	cellular component	16	6	0.1038	0.0599	0.05094	0.6994	0.03114	0.08951	0.1204	0.04836	0.0742	0.03016	0.08604
810	319162	H2AW	20507	chromatin silencing	GO:0006342	biological process	11	7	0.08599	0.01457	0.002951	0.9537	0.009034	0.08287	0.08923	0.007386	0.02873	0.001078	0.008079
811	319162	H2AW	20507	UV-damage excision repair	GO:0070914	biological process	11	3	0.08599	0.01934	0.007598	0.9223	0.01201	0.08287	0.08923	0.01516	0.02466	0.004567	0.01264
812	319162	H2AW	20507	DNA binding	GO:0003677	molecular function	11	24	0.08599	0.01934	0.01028	0.9048	0.01388	0.08287	0.08923	0.01516	0.02466	0.006614	0.01597
813	319162	H2AW	20507	nucleosome disassembly	GO:0006337	biological process	11	6	0.08599	0.02016	0.009915	0.9121	0.002588	0.08287	0.08923	0.01649	0.02465	0.008971	0.01096
814	319162	H2AW	20507	nucleosome	GO:0000786	cellular component	11	6	0.08599	0.02758	0.02342	0.8109	0.01763	0.08287	0.08923	0.0246	0.03092	0.01766	0.03106
815	319162	H2AW	20507	extracellular exosome	GO:0070062	cellular component	11	24	0.08599	0.02924	0.0257	0.7974	0.01041	0.08287	0.08923	0.02816	0.03036	0.02169	0.03046
816	319162	H2AW	20507	protein binding	GO:0005515	molecular function	11	237	0.08967	0.03351	0.03199	0.7658	0.0195	0.07986	0.1007	0.02542	0.04416	0.02299	0.04453
817	104156	ETV5	3494	RNA polymerase II transcription regulatory region sequence-specific DNA binding	GO:0000977	molecular function	15	6	0.08599	0.03825	0.01136	0.9001	0.008897	0.08287	0.08923	0.03156	0.04634	0.00865	0.01492
818	104156	ETV5	3494	DNA-binding transcription activator activity, RNA polymerase II-specific	GO:0001228	molecular function	15	6	0.08599	0.03825	0.01257	0.8932	0.004911	0.08287	0.08923	0.03156	0.04634	0.01106	0.01428
819	104156	ETV5	3494	sequence-specific double-stranded DNA binding	GO:1990837	molecular function	15	15	0.08599	0.03825	0.01246	0.8905	0.0141	0.08287	0.08923	0.03156	0.04634	0.008816	0.0176
820	104156	ETV5	3494	transcription regulatory region sequence-specific DNA binding	GO:0000976	molecular function	15	16	0.08599	0.03825	0.01432	0.8785	0.01044	0.08287	0.08923	0.03156	0.04634	0.01136	0.01803
821	104156	ETV5	3494	DNA-binding transcription factor activity, RNA polymerase II-specific	GO:0000981	molecular function	15	13	0.08599	0.03825	0.01577	0.8658	0.01305	0.08287	0.08923	0.03156	0.04634	0.01209	0.02058
822	104156	ETV5	3494	DNA-binding transcription factor activity	GO:0003700	molecular function	15	10	0.08599	0.03825	0.01714	0.8568	0.01022	0.08287	0.08923	0.03156	0.04634	0.01426	0.02062
823	104156	ETV5	3494	negative regulation of transcription by RNA polymerase II	GO:0000122	biological process	15	29	0.08599	0.03881	0.02135	0.8238	0.02131	0.08287	0.08923	0.03114	0.04836	0.015	0.03038
824	104156	ETV5	3494	positive regulation of transcription by RNA polymerase II	GO:0045944	biological process	15	43	0.08599	0.04128	0.02557	0.7978	0.006079	0.08287	0.08923	0.03489	0.04884	0.02319	0.02819
825	104156	ETV5	3494	regulation of transcription by RNA polymerase II	GO:0006357	biological process	15	42	0.08836	0.04973	0.03265	0.7633	0.02309	0.087	0.08974	0.03553	0.06961	0.02228	0.04784
826	104156	ETV5	3494	cellular response to oxidative stress	GO:0034599	biological process	15	5	0.08902	0.04344	0.02731	0.7903	0.03393	0.08249	0.09606	0.028	0.0674	0.01548	0.04818
827	104156	ETV5	3494	nucleus	GO:0005634	cellular component	15	48	0.1331	0.1048	0.0873	0.6201	0.002051	0.1265	0.1401	0.1023	0.1075	0.08451	0.09017
828	104156	ETV5	3494	nucleoplasm	GO:0005654	cellular component	15	26	0.148	0.1155	0.1012	0.5971	0.009693	0.1378	0.1589	0.1011	0.1321	0.08728	0.1174
829	104156	ETV5	3494	cell differentiation	GO:0030154	biological process	15	84	0.165	0.13	0.1194	0.5692	0.0245	0.1263	0.2156	0.1007	0.1678	0.08352	0.1707
830	104156	ETV5	3494	protein binding	GO:0005515	molecular function	15	237	0.1862	0.1452	0.1416	0.5416	0.007446	0.1733	0.2001	0.1351	0.156	0.1277	0.1571
831	20351	SEMA4A	10729	semaphorin-plexin signaling pathway	GO:0071526	biological process	11	7	0.1074	0.2134	0.05722	0.682	0.03159	0.08083	0.1426	0.1539	0.2959	0.03401	0.09629
832	20351	SEMA4A	10729	axon guidance	GO:0007411	biological process	11	24	0.1201	0.2134	0.07173	0.6497	0.01541	0.1039	0.1388	0.1539	0.2959	0.05611	0.09171
833	20351	SEMA4A	10729	integral component of plasma membrane	GO:0005887	cellular component	11	31	0.1469	0.2134	0.09246	0.6076	0.0466	0.1005	0.2147	0.1539	0.2959	0.04456	0.1918
834	20351	SEMA4A	10729	negative regulation of axon extension involved in axon guidance	GO:0048843	biological process	11	5	0.1558	0.2134	0.109	0.5838	0.02693	0.1169	0.2077	0.1539	0.2959	0.07303	0.1628
835	20351	SEMA4A	10729	negative chemotaxis	GO:0050919	biological process	11	13	0.1804	0.2134	0.1338	0.5493	0.02937	0.1357	0.2399	0.1539	0.2959	0.08901	0.2011
836	20351	SEMA4A	10729	neural crest cell migration	GO:0001755	biological process	11	7	0.1841	0.2169	0.1335	0.5469	0.04568	0.1222	0.2775	0.1585	0.297	0.06874	0.2593
837	20351	SEMA4A	10729	semaphorin receptor binding	GO:0030215	molecular function	11	3	0.1864	0.2134	0.1413	0.5412	0.01807	0.157	0.2213	0.1539	0.2959	0.1097	0.182
838	20351	SEMA4A	10729	chemorepellent activity	GO:0045499	molecular function	11	3	0.1881	0.2179	0.1421	0.5384	0.03359	0.1334	0.2654	0.1604	0.2959	0.08992	0.2245
839	20351	SEMA4A	10729	positive regulation of cell migration	GO:0030335	biological process	11	28	0.2428	0.2519	0.1999	0.4753	0.03655	0.1674	0.3522	0.1833	0.3461	0.125	0.3198
840	20351	SEMA4A	10729	extracellular space	GO:0005615	cellular component	11	17	0.2464	0.2433	0.2026	0.4694	0.052	0.1524	0.3983	0.145	0.4083	0.1106	0.371
841	20351	SEMA4A	10729	protein binding	GO:0005515	molecular function	11	237	0.3765	0.347	0.347	0.3583	0.03275	0.2864	0.4949	0.2527	0.4764	0.2527	0.4764
842	212531	SH3BGRL2	15567	nucleoplasm	GO:0005654	cellular component	2	26	0.2244	0.3342	0.1816	0.4963	0.01448	0.1968	0.2559	0.3006	0.3715	0.1508	0.2186
843	212531	SH3BGRL2	15567	nuclear membrane	GO:0031965	cellular component	2	7	0.3721	0.3427	0.3427	0.3638	0.006873	0.3476	0.3984	0.3197	0.3673	0.3197	0.3673
844	269642	NAT8L	26742	aspartate N-acetyltransferase activity	GO:0017188	molecular function	6	2	0.09098	0.2247	0.03745	0.7436	0.01835	0.08755	0.09456	0.1639	0.3081	0.02732	0.05135
845	269642	NAT8L	26742	mitochondrion	GO:0005739	cellular component	6	12	0.1911	0.2993	0.1459	0.5365	0.008277	0.1747	0.209	0.2407	0.3721	0.1301	0.1637
846	269642	NAT8L	26742	protein binding	GO:0005515	molecular function	6	237	0.2206	0.2993	0.1781	0.5006	0.006138	0.2115	0.23	0.2407	0.3721	0.1646	0.1926
847	269642	NAT8L	26742	cytoplasm	GO:0005737	cellular component	6	35	0.2337	0.2993	0.1917	0.4854	0.02235	0.1922	0.2843	0.2407	0.3721	0.1448	0.2539
848	269642	NAT8L	26742	mitochondrial membrane	GO:0031966	cellular component	6	4	0.362	0.3797	0.3287	0.3705	0.03491	0.2725	0.4811	0.2894	0.4981	0.2327	0.4642
849	269642	NAT8L	26742	N-acetyltransferase activity	GO:0008080	molecular function	6	32	0.5139	0.4951	0.4951	0.266	0.02644	0.4228	0.6248	0.398	0.6159	0.398	0.6159
850	94246	ARID4B	15550	nucleus	GO:0005634	cellular component	12	48	0.08599	0.03926	0.02173	0.8219	0.01919	0.08287	0.08923	0.02642	0.05836	0.01597	0.02956
851	94246	ARID4B	15550	transcription regulatory region sequence-specific DNA binding	GO:0000976	molecular function	12	16	0.08599	0.03926	0.02216	0.8194	0.01986	0.08287	0.08923	0.02642	0.05836	0.0161	0.03049
852	94246	ARID4B	15550	nucleoplasm	GO:0005654	cellular component	12	26	0.08599	0.03926	0.02464	0.804	0.01964	0.08287	0.08923	0.02642	0.05836	0.01787	0.03397
853	94246	ARID4B	15550	regulation of transcription by RNA polymerase II	GO:0006357	biological process	12	42	0.08677	0.03926	0.02622	0.795	0.02651	0.08473	0.08887	0.02642	0.05836	0.01706	0.04028
854	94246	ARID4B	15550	cytosol	GO:0005829	cellular component	12	32	0.08738	0.03926	0.03272	0.7625	0.01688	0.08487	0.08997	0.02642	0.05836	0.02465	0.04344
855	94246	ARID4B	15550	protein binding	GO:0005515	molecular function	12	237	0.08992	0.03926	0.03546	0.7514	0.02236	0.08794	0.09193	0.02642	0.05836	0.02431	0.05173
856	94246	ARID4B	15550	mitochondrion	GO:0005739	cellular component	12	12	0.09672	0.04256	0.04256	0.7257	0.02925	0.08734	0.1071	0.02593	0.06986	0.02593	0.06986
857	64176	SV2B	16874	integral component of membrane	GO:0016021	cellular component	5	18	0.08599	0.03363	0.01501	0.8738	0.008898	0.08287	0.08923	0.02491	0.04542	0.01239	0.01818
858	64176	SV2B	16874	neuron projection	GO:0043005	cellular component	5	27	0.08599	0.03363	0.01797	0.8455	0.02543	0.08287	0.08923	0.02491	0.04542	0.01119	0.02885
859	64176	SV2B	16874	synaptic vesicle membrane	GO:0030672	cellular component	5	3	0.09041	0.03875	0.03199	0.7663	0.02339	0.07924	0.1031	0.03079	0.04878	0.02148	0.04763
860	64176	SV2B	16874	protein binding	GO:0005515	molecular function	5	237	0.09639	0.0488	0.04434	0.7196	0.02109	0.09009	0.1031	0.04103	0.05804	0.03095	0.06352
861	213053	SLC39A14	20858	zinc ion import across plasma membrane	GO:0071578	biological process	18	3	0.08599	0.03648	0.005329	0.9405	0.0007714	0.08287	0.08923	0.02963	0.04492	0.005024	0.005653
862	213053	SLC39A14	20858	integral component of membrane	GO:0016021	cellular component	18	18	0.08599	0.03648	0.007629	0.926	0.004294	0.08287	0.08923	0.02963	0.04492	0.006182	0.009413
863	213053	SLC39A14	20858	lysosomal membrane	GO:0005765	cellular component	18	9	0.08599	0.03648	0.008463	0.9133	0.01594	0.08287	0.08923	0.02963	0.04492	0.00417	0.01718
864	213053	SLC39A14	20858	iron import into cell	GO:0033212	biological process	18	11	0.08599	0.03739	0.01121	0.8977	0.01495	0.08287	0.08923	0.0302	0.0463	0.007065	0.01779
865	213053	SLC39A14	20858	zinc ion transmembrane transport	GO:0071577	biological process	18	6	0.08599	0.03739	0.01719	0.8574	0.007089	0.08287	0.08923	0.0302	0.0463	0.0153	0.01932
866	213053	SLC39A14	20858	import across plasma membrane	GO:0098739	biological process	18	30	0.08599	0.03739	0.01855	0.8427	0.02309	0.08287	0.08923	0.0302	0.0463	0.01225	0.02807
867	213053	SLC39A14	20858	basolateral plasma membrane	GO:0016323	cellular component	18	3	0.08599	0.03739	0.01977	0.8363	0.0164	0.08287	0.08923	0.0302	0.0463	0.0152	0.02572
868	213053	SLC39A14	20858	integral component of plasma membrane	GO:0005887	cellular component	18	31	0.08599	0.03739	0.02117	0.8269	0.004337	0.08287	0.08923	0.0302	0.0463	0.01983	0.0226
869	213053	SLC39A14	20858	cellular zinc ion homeostasis	GO:0006882	biological process	18	5	0.08599	0.03739	0.022	0.8209	0.003874	0.08287	0.08923	0.0302	0.0463	0.02075	0.02332
870	213053	SLC39A14	20858	apical plasma membrane	GO:0016324	cellular component	18	3	0.08599	0.03739	0.02333	0.8118	0.01165	0.08287	0.08923	0.0302	0.0463	0.01941	0.02804
871	213053	SLC39A14	20858	iron ion transmembrane transport	GO:0034755	biological process	18	10	0.08659	0.03846	0.02633	0.7945	0.02437	0.08243	0.09096	0.02975	0.04971	0.0177	0.03917
872	213053	SLC39A14	20858	manganese ion transmembrane transport	GO:0071421	biological process	18	5	0.08812	0.03927	0.03203	0.7655	0.01335	0.08116	0.09567	0.02935	0.05253	0.02561	0.04006
873	213053	SLC39A14	20858	manganese ion transmembrane transporter activity	GO:0005384	molecular function	18	4	0.08837	0.04072	0.03405	0.7571	0.01649	0.08337	0.09368	0.03051	0.05433	0.02572	0.04507
874	213053	SLC39A14	20858	late endosome membrane	GO:0031902	cellular component	18	4	0.0907	0.04074	0.0339	0.758	0.02239	0.079	0.1041	0.02856	0.05812	0.02311	0.04971
875	213053	SLC39A14	20858	early endosome membrane	GO:0031901	cellular component	18	3	0.09194	0.04111	0.0334	0.7598	0.02969	0.07799	0.1084	0.02835	0.05961	0.02025	0.0551
876	213053	SLC39A14	20858	plasma membrane	GO:0005886	cellular component	18	52	0.09375	0.04724	0.04259	0.7255	0.01179	0.08386	0.1048	0.03863	0.05777	0.03474	0.05221
877	213053	SLC39A14	20858	zinc ion transmembrane transporter activity	GO:0005385	molecular function	18	5	0.1084	0.05966	0.05966	0.6774	0.01308	0.09655	0.1216	0.04824	0.0738	0.04824	0.0738
878	12455	CCNT1	1599	transcription factor binding	GO:0008134	molecular function	18	8	0.08599	0.03733	0.005334	0.9107	0.03325	0.08287	0.08923	0.01395	0.09986	0.0008501	0.03347
879	12455	CCNT1	1599	P-TEFb complex	GO:0070691	cellular component	18	2	0.08599	0.05201	0.01098	0.9014	0.01107	0.08287	0.08923	0.03276	0.08258	0.007601	0.01586
880	12455	CCNT1	1599	positive regulation of DNA-templated transcription, elongation	GO:0032786	biological process	18	6	0.08599	0.05201	0.01882	0.8399	0.03245	0.08287	0.08923	0.03276	0.08258	0.01065	0.03327
881	12455	CCNT1	1599	cyclin-dependent protein serine/threonine kinase activator activity	GO:0061575	molecular function	18	3	0.08599	0.05201	0.02145	0.8247	0.01657	0.08287	0.08923	0.03276	0.08258	0.01649	0.02791
882	12455	CCNT1	1599	positive regulation of transcription by RNA polymerase II	GO:0045944	biological process	18	43	0.08599	0.05201	0.02146	0.8246	0.01992	0.08287	0.08923	0.03276	0.08258	0.0156	0.02953
883	12455	CCNT1	1599	RNA polymerase binding	GO:0070063	molecular function	18	4	0.08599	0.05201	0.02316	0.8139	0.02545	0.08287	0.08923	0.03276	0.08258	0.01531	0.03503
884	12455	CCNT1	1599	DNA binding	GO:0003677	molecular function	18	24	0.08599	0.05201	0.02624	0.795	0.01649	0.08287	0.08923	0.03276	0.08258	0.02008	0.03428
885	12455	CCNT1	1599	cyclin/CDK positive transcription elongation factor complex	GO:0008024	cellular component	18	6	0.08706	0.05201	0.03349	0.7592	0.009473	0.08363	0.09064	0.03276	0.08258	0.02855	0.03928
886	12455	CCNT1	1599	regulation of transcription by RNA polymerase II	GO:0006357	biological process	18	42	0.08882	0.05221	0.03358	0.7593	0.02063	0.08317	0.09486	0.03264	0.08351	0.02361	0.04778
887	12455	CCNT1	1599	cyclin-dependent protein serine/threonine kinase regulator activity	GO:0016538	molecular function	18	4	0.08985	0.05221	0.03591	0.7496	0.0192	0.08346	0.09674	0.03264	0.08351	0.0258	0.04999
888	12455	CCNT1	1599	protein phosphorylation	GO:0006468	biological process	18	28	0.09096	0.05231	0.03252	0.7638	0.03084	0.08108	0.102	0.03258	0.08397	0.01935	0.05466
889	12455	CCNT1	1599	nucleus	GO:0005634	cellular component	18	48	0.09248	0.0526	0.03452	0.755	0.03384	0.07991	0.107	0.03241	0.08539	0.01949	0.06116
890	12455	CCNT1	1599	7SK snRNA binding	GO:0097322	molecular function	18	2	0.0941	0.0526	0.04033	0.7328	0.02846	0.08005	0.1106	0.03241	0.08539	0.02492	0.06526
891	12455	CCNT1	1599	negative regulation of mRNA polyadenylation	GO:1900364	biological process	18	3	0.1051	0.06038	0.05165	0.6961	0.04074	0.07754	0.1425	0.0314	0.1161	0.02651	0.1006
892	12455	CCNT1	1599	nucleoplasm	GO:0005654	cellular component	18	26	0.107	0.05957	0.05249	0.6932	0.04477	0.07505	0.1527	0.03077	0.1153	0.02537	0.1086
893	12455	CCNT1	1599	protein binding	GO:0005515	molecular function	18	237	0.1158	0.06847	0.06594	0.6616	0.02911	0.09075	0.1478	0.04048	0.1158	0.04142	0.105
894	12455	CCNT1	1599	cytosol	GO:0005829	cellular component	18	32	0.121	0.0703	0.0695	0.6529	0.03773	0.08728	0.1678	0.03947	0.1252	0.03852	0.1254
895	16502	KCNC1	6233	delayed rectifier potassium channel activity	GO:0005251	molecular function	10	3	0.08599	0.03218	0.01222	0.8946	0.007918	0.08287	0.08923	0.02471	0.0419	0.009819	0.01522
896	16502	KCNC1	6233	protein tetramerization	GO:0051262	biological process	10	5	0.08599	0.03218	0.01558	0.8644	0.024	0.08287	0.08923	0.02471	0.0419	0.01005	0.02416
897	16502	KCNC1	6233	potassium ion transmembrane transport	GO:0071805	biological process	10	9	0.08599	0.03218	0.0168	0.8584	0.01646	0.08287	0.08923	0.02471	0.0419	0.01267	0.02227
898	16502	KCNC1	6233	voltage-gated potassium channel activity	GO:0005249	molecular function	10	11	0.08599	0.03218	0.01764	0.8529	0.01322	0.08287	0.08923	0.02471	0.0419	0.01417	0.02196
899	16502	KCNC1	6233	axon	GO:0030424	cellular component	10	12	0.08599	0.03218	0.01953	0.8349	0.02557	0.08287	0.08923	0.02471	0.0419	0.0124	0.03077
900	16502	KCNC1	6233	dendrite membrane	GO:0032590	cellular component	10	3	0.08599	0.03533	0.0249	0.8024	0.01349	0.08287	0.08923	0.03078	0.04055	0.0202	0.03068
901	16502	KCNC1	6233	integral component of membrane	GO:0016021	cellular component	10	18	0.08599	0.03569	0.02643	0.7935	0.01424	0.08287	0.08923	0.03049	0.04178	0.02088	0.03345
902	16502	KCNC1	6233	neuronal cell body membrane	GO:0032809	cellular component	10	4	0.0863	0.03364	0.02134	0.8206	0.03175	0.08265	0.09012	0.02546	0.04445	0.01209	0.03765
903	16502	KCNC1	6233	voltage-gated potassium channel complex	GO:0008076	cellular component	10	17	0.1215	0.0757	0.07057	0.6516	0.02813	0.09881	0.1495	0.05069	0.1131	0.04483	0.1111
904	16502	KCNC1	6233	protein binding	GO:0005515	molecular function	10	237	0.1443	0.1018	0.09828	0.6014	0.02042	0.1162	0.1792	0.07942	0.1305	0.07185	0.1344
905	319965	CC2D1B	29386	intracellular membrane-bounded organelle	GO:0043231	cellular component	8	39	0.08599	0.03469	0.009597	0.9123	0.007612	0.08287	0.08923	0.02333	0.05156	0.007005	0.01315
906	319965	CC2D1B	29386	DNA-binding transcription factor activity, RNA polymerase II-specific	GO:0000981	molecular function	8	13	0.08599	0.03469	0.01374	0.8768	0.0186	0.08287	0.08923	0.02333	0.05156	0.008515	0.02218
907	319965	CC2D1B	29386	RNA polymerase II cis-regulatory region sequence-specific DNA binding	GO:0000978	molecular function	8	22	0.08599	0.03469	0.01861	0.8453	0.01177	0.08287	0.08923	0.02333	0.05156	0.01538	0.0225
908	319965	CC2D1B	29386	regulation of transcription by RNA polymerase II	GO:0006357	biological process	8	42	0.08599	0.03482	0.02544	0.7993	0.01532	0.08287	0.08923	0.02325	0.05214	0.01985	0.0326
909	319965	CC2D1B	29386	nucleus	GO:0005634	cellular component	8	48	0.08614	0.03482	0.02508	0.8024	0.02507	0.08301	0.08939	0.02325	0.05214	0.01668	0.03771
910	319965	CC2D1B	29386	nucleoplasm	GO:0005654	cellular component	8	26	0.08816	0.03482	0.02873	0.7821	0.02669	0.08301	0.09363	0.02325	0.05214	0.0184	0.04486
911	319965	CC2D1B	29386	protein binding	GO:0005515	molecular function	8	237	0.09291	0.04108	0.04108	0.7302	0.01672	0.08524	0.1013	0.03091	0.05461	0.03091	0.05461
912	228005	PPIG	14650	intracellular membrane-bounded organelle	GO:0043231	cellular component	11	39	0.1227	0.3991	0.07479	0.6433	0.01803	0.1025	0.1469	0.2629	0.6058	0.05602	0.09985
913	228005	PPIG	14650	cyclosporin A binding	GO:0016018	molecular function	11	3	0.2105	0.3991	0.1624	0.5084	0.06124	0.1194	0.3709	0.2629	0.6058	0.07623	0.3458
914	228005	PPIG	14650	RNA binding	GO:0003723	molecular function	11	43	0.2258	0.3991	0.182	0.4951	0.02283	0.1832	0.2782	0.2629	0.6058	0.1358	0.244
915	228005	PPIG	14650	nucleus	GO:0005634	cellular component	11	48	0.2624	0.3991	0.2196	0.4554	0.04302	0.1777	0.3876	0.2629	0.6058	0.1308	0.3688
916	228005	PPIG	14650	cytosol	GO:0005829	cellular component	11	32	0.274	0.3991	0.2315	0.4436	0.04859	0.1775	0.4229	0.2629	0.6058	0.1322	0.4054
917	228005	PPIG	14650	nuclear speck	GO:0016607	cellular component	11	6	0.2999	0.4602	0.2634	0.4209	0.02717	0.2335	0.3852	0.3212	0.6594	0.1953	0.3551
918	228005	PPIG	14650	protein binding	GO:0005515	molecular function	11	237	0.3033	0.4062	0.2662	0.4169	0.03758	0.2175	0.4231	0.2723	0.6061	0.175	0.405
919	228005	PPIG	14650	cytoplasm	GO:0005737	cellular component	11	35	0.3094	0.4128	0.2693	0.412	0.04819	0.2058	0.4652	0.2766	0.616	0.1618	0.4484
920	228005	PPIG	14650	protein peptidyl-prolyl isomerization	GO:0000413	biological process	11	3	0.3817	0.5088	0.3406	0.3459	0.0816	0.1908	0.7636	0.3199	0.8093	0.1433	0.8092
921	228005	PPIG	14650	peptidyl-prolyl cis-trans isomerase activity	GO:0003755	molecular function	11	3	0.5548	0.5858	0.5326	0.2316	0.06297	0.3691	0.834	0.3739	0.9179	0.3399	0.8345
922	228005	PPIG	14650	protein folding	GO:0006457	biological process	11	9	0.701	0.6879	0.6879	0.1391	0.06184	0.5152	0.9538	0.496	0.9539	0.496	0.9539
923	19711	RESP18	33762	endoplasmic reticulum	GO:0005783	cellular component	1	18	0.2151	0.1696	0.1696	0.5054	0.04112	0.1473	0.3141	0.1013	0.284	0.1013	0.284
924	269608	PLEKHG5	29105	endothelial cell migration	GO:0043542	biological process	7	6	0.08599	0.03887	0.0112	0.8966	0.01753	0.08287	0.08923	0.03477	0.04344	0.006888	0.0182
925	269608	PLEKHG5	29105	positive regulation of I-kappaB kinase/NF-kappaB signaling	GO:0043123	biological process	7	5	0.08599	0.03887	0.01763	0.8489	0.02159	0.08287	0.08923	0.03477	0.04344	0.01166	0.02665
926	269608	PLEKHG5	29105	plasma membrane	GO:0005886	cellular component	7	52	0.08599	0.04232	0.02421	0.8061	0.006483	0.08287	0.08923	0.03931	0.04557	0.02183	0.02684
927	269608	PLEKHG5	29105	axon	GO:0030424	cellular component	7	12	0.08711	0.04491	0.03157	0.7674	0.008653	0.08428	0.09004	0.03739	0.05394	0.02726	0.03655
928	269608	PLEKHG5	29105	endocytic vesicle	GO:0030139	cellular component	7	8	0.09202	0.04908	0.0409	0.7312	0.01233	0.0904	0.09367	0.03975	0.06061	0.03312	0.05051
929	269608	PLEKHG5	29105	Rho protein signal transduction	GO:0007266	biological process	7	3	0.1504	0.1029	0.1029	0.5916	0.0364	0.106	0.2135	0.06055	0.175	0.06055	0.175
930	224648	UHRF1BP1	21216	identical protein binding	GO:0042802	molecular function	6	14	0.08599	0.01454	0.008921	0.9177	0.005419	0.08287	0.08923	0.01117	0.01892	0.007218	0.01103
931	224648	UHRF1BP1	21216	histone deacetylase binding	GO:0042826	molecular function	6	2	0.08599	0.01454	0.00969	0.9118	0.007707	0.08287	0.08923	0.01117	0.01892	0.007445	0.01261
932	224648	UHRF1BP1	21216	protein binding	GO:0005515	molecular function	6	237	0.08599	0.02311	0.02311	0.8133	0.005951	0.08287	0.08923	0.02107	0.02534	0.02107	0.02534
933	15165	HCN1	4845	HCN channel complex	GO:0098855	cellular component	14	2	0.08599	0.05295	0.01559	0.8566	0.02821	0.08287	0.08923	0.04001	0.07007	0.008059	0.03017
934	15165	HCN1	4845	sodium ion transmembrane transport	GO:0035725	biological process	14	8	0.08599	0.05295	0.0203	0.8323	0.009807	0.08287	0.08923	0.04001	0.07007	0.0174	0.02368
935	15165	HCN1	4845	potassium ion transmembrane transport	GO:0071805	biological process	14	9	0.08599	0.05295	0.02275	0.8156	0.00809	0.08287	0.08923	0.04001	0.07007	0.02016	0.02569
936	15165	HCN1	4845	voltage-gated potassium channel activity	GO:0005249	molecular function	14	11	0.08599	0.05295	0.02308	0.8135	0.00924	0.08287	0.08923	0.04001	0.07007	0.02007	0.02654
937	15165	HCN1	4845	voltage-gated cation channel activity	GO:0022843	molecular function	14	7	0.08599	0.05295	0.02427	0.8058	0.01559	0.08287	0.08923	0.04001	0.07007	0.0189	0.03115
938	15165	HCN1	4845	protein homotetramerization	GO:0051289	biological process	14	4	0.08616	0.05295	0.01596	0.8568	0.03799	0.0833	0.08912	0.04001	0.07007	0.007943	0.03205
939	15165	HCN1	4845	voltage-gated sodium channel activity	GO:0005248	molecular function	14	5	0.08628	0.05303	0.02878	0.7813	0.0202	0.08312	0.08955	0.04	0.0703	0.0207	0.04001
940	15165	HCN1	4845	integral component of plasma membrane	GO:0005887	cellular component	14	31	0.09471	0.0641	0.0427	0.7247	0.0178	0.08561	0.1048	0.04981	0.08248	0.03158	0.05772
941	15165	HCN1	4845	plasma membrane	GO:0005886	cellular component	14	52	0.1067	0.07609	0.05833	0.6805	0.004169	0.1014	0.1122	0.06826	0.08481	0.05437	0.06259
942	15165	HCN1	4845	cellular response to cAMP	GO:0071320	biological process	14	5	0.1161	0.07855	0.05547	0.6839	0.06209	0.07459	0.1806	0.03689	0.1672	0.02051	0.15
943	15165	HCN1	4845	cAMP binding	GO:0030552	molecular function	14	4	0.1178	0.08357	0.06407	0.6648	0.04142	0.08936	0.1553	0.04697	0.1487	0.03237	0.1268
944	15165	HCN1	4845	protein binding	GO:0005515	molecular function	14	237	0.1597	0.119	0.111	0.5812	0.02404	0.1303	0.1956	0.08427	0.1681	0.07749	0.1591
945	15165	HCN1	4845	regulation of membrane potential	GO:0042391	biological process	14	24	0.2007	0.1568	0.1568	0.5232	0.01507	0.1738	0.2319	0.1285	0.1915	0.1285	0.1915
946	11302	AATK	21	protein tyrosine kinase activity	GO:0004713	molecular function	6	4	0.08599	0.0448	0.008778	0.9171	0.008299	0.08287	0.08923	0.03329	0.0603	0.005915	0.01303
947	11302	AATK	21	peptidyl-tyrosine autophosphorylation	GO:0038083	biological process	6	3	0.08599	0.05179	0.01977	0.8368	0.01091	0.08287	0.08923	0.04297	0.06243	0.01662	0.02351
948	11302	AATK	21	protein phosphorylation	GO:0006468	biological process	6	28	0.0877	0.05601	0.03125	0.7688	0.01266	0.08587	0.08958	0.04089	0.07672	0.02524	0.0387
949	11302	AATK	21	protein kinase activity	GO:0004672	molecular function	6	29	0.09352	0.05738	0.04209	0.7271	0.01115	0.08601	0.1017	0.04192	0.07854	0.0347	0.05105
950	11302	AATK	21	brain development	GO:0007420	biological process	6	2	0.1013	0.05978	0.04982	0.7029	0.02292	0.08523	0.1203	0.04073	0.08774	0.03394	0.07312
951	11302	AATK	21	protein binding	GO:0005515	molecular function	6	237	0.1875	0.1402	0.1402	0.5394	0.04034	0.1258	0.2792	0.08213	0.2395	0.08213	0.2395
952	18186	NRP1	8004	VEGF-activated neuropilin signaling pathway	GO:0038190	biological process	32	4	0.08599	0.09477	0.01261	0.8908	0.01222	0.08287	0.08923	0.07249	0.1239	0.009498	0.01674
953	18186	NRP1	8004	positive regulation of phosphorylation	GO:0042327	biological process	32	7	0.08599	0.09477	0.01369	0.8765	0.02576	0.08287	0.08923	0.07249	0.1239	0.00822	0.02279
954	18186	NRP1	8004	neuropilin signaling pathway	GO:0038189	biological process	32	3	0.08599	0.09477	0.01503	0.8707	0.0186	0.08287	0.08923	0.07249	0.1239	0.0106	0.0213
955	18186	NRP1	8004	endothelial cell chemotaxis	GO:0035767	biological process	32	4	0.08599	0.097	0.02336	0.8116	0.01592	0.08287	0.08923	0.07652	0.123	0.01807	0.03021
956	18186	NRP1	8004	endothelial cell migration	GO:0043542	biological process	32	6	0.08604	0.09477	0.02323	0.8127	0.01331	0.08284	0.08936	0.07249	0.1239	0.01883	0.02867
957	18186	NRP1	8004	positive regulation of peptidyl-tyrosine phosphorylation	GO:0050731	biological process	32	7	0.08639	0.09477	0.01964	0.8341	0.03036	0.08258	0.09037	0.07249	0.1239	0.01153	0.03347
958	18186	NRP1	8004	integrin-mediated signaling pathway	GO:0007229	biological process	32	2	0.08639	0.09477	0.024	0.8086	0.01706	0.08258	0.09037	0.07249	0.1239	0.01824	0.03158
959	18186	NRP1	8004	growth factor binding	GO:0019838	molecular function	32	22	0.08651	0.1031	0.02565	0.7983	0.02684	0.08416	0.08894	0.08244	0.129	0.01656	0.03972
960	18186	NRP1	8004	positive regulation of endothelial cell migration	GO:0010595	biological process	32	6	0.09627	0.1208	0.0465	0.7128	0.01107	0.08488	0.1092	0.07457	0.1956	0.03854	0.0561
961	18186	NRP1	8004	hepatocyte growth factor receptor signaling pathway	GO:0048012	biological process	32	2	0.09845	0.1136	0.0339	0.7578	0.05335	0.07307	0.1327	0.06484	0.199	0.01403	0.08195
962	18186	NRP1	8004	GTPase activator activity	GO:0005096	molecular function	32	7	0.1054	0.1249	0.05451	0.6894	0.02827	0.08192	0.1356	0.07645	0.2041	0.03406	0.08724
963	18186	NRP1	8004	vascular endothelial growth factor receptor signaling pathway	GO:0048010	biological process	32	7	0.1066	0.1219	0.05635	0.6836	0.03659	0.07516	0.1513	0.07395	0.201	0.03106	0.1022
964	18186	NRP1	8004	platelet-derived growth factor receptor signaling pathway	GO:0048008	biological process	32	5	0.1095	0.1215	0.04927	0.7037	0.05466	0.07862	0.1527	0.07127	0.2073	0.02014	0.1205
965	18186	NRP1	8004	vascular endothelial growth factor binding	GO:0038085	molecular function	32	2	0.1132	0.1149	0.03538	0.7462	0.09141	0.06391	0.2006	0.06065	0.2176	0.008079	0.1549
966	18186	NRP1	8004	regulation of Cdc42 protein signal transduction	GO:0032489	biological process	32	2	0.1202	0.1272	0.07045	0.6508	0.03772	0.08244	0.1752	0.0756	0.2139	0.03908	0.127
967	18186	NRP1	8004	plasma membrane	GO:0005886	cellular component	32	52	0.1249	0.1286	0.07639	0.6397	0.02671	0.09555	0.1632	0.07913	0.2091	0.04999	0.1167
968	18186	NRP1	8004	extracellular space	GO:0005615	cellular component	32	17	0.1336	0.1358	0.08049	0.6271	0.05653	0.0782	0.2282	0.0759	0.2431	0.03352	0.1933
969	18186	NRP1	8004	positive regulation of substrate adhesion-dependent cell spreading	GO:1900026	biological process	32	5	0.1398	0.1361	0.08831	0.613	0.05386	0.08217	0.2377	0.07578	0.2444	0.03928	0.1986
970	18186	NRP1	8004	angiogenesis	GO:0001525	biological process	32	7	0.1407	0.149	0.0941	0.6085	0.007976	0.1273	0.1555	0.1068	0.2077	0.08306	0.1066
971	18186	NRP1	8004	cellular response to hepatocyte growth factor stimulus	GO:0035729	biological process	32	3	0.1441	0.1361	0.09331	0.6045	0.05308	0.08457	0.2454	0.07578	0.2444	0.04269	0.2039
972	18186	NRP1	8004	substrate-dependent cell migration, cell extension	GO:0006930	biological process	32	2	0.1464	0.1414	0.09573	0.6028	0.04435	0.09469	0.2264	0.08188	0.2442	0.04825	0.1899
973	18186	NRP1	8004	focal adhesion	GO:0005925	cellular component	32	6	0.1467	0.149	0.1009	0.5975	0.01055	0.1287	0.1672	0.1068	0.2077	0.08579	0.1186
974	18186	NRP1	8004	cytosol	GO:0005829	cellular component	32	32	0.1567	0.1459	0.1059	0.581	0.06487	0.08207	0.299	0.07675	0.2772	0.04305	0.2605
975	18186	NRP1	8004	actin cytoskeleton reorganization	GO:0031532	biological process	32	3	0.1666	0.1598	0.1212	0.5679	0.01166	0.1447	0.1918	0.1162	0.2198	0.1024	0.1434
976	18186	NRP1	8004	viral entry into host cell	GO:0046718	biological process	32	6	0.1702	0.1751	0.1233	0.5643	0.02043	0.1409	0.2055	0.1518	0.2019	0.09138	0.1663
977	18186	NRP1	8004	positive regulation of focal adhesion assembly	GO:0051894	biological process	32	5	0.1707	0.159	0.1243	0.5614	0.03109	0.1224	0.2381	0.1048	0.2412	0.0805	0.1919
978	18186	NRP1	8004	substrate adhesion-dependent cell spreading	GO:0034446	biological process	32	5	0.1862	0.1812	0.1413	0.5418	0.01411	0.1624	0.2135	0.1537	0.2136	0.1162	0.1717
979	18186	NRP1	8004	protein binding	GO:0005515	molecular function	32	237	0.1986	0.1768	0.1511	0.5226	0.05634	0.113	0.3491	0.09974	0.3133	0.07212	0.3167
980	18186	NRP1	8004	positive regulation of filopodium assembly	GO:0051491	biological process	32	3	0.2767	0.2545	0.2382	0.4431	0.01732	0.2311	0.3313	0.2071	0.3129	0.1937	0.2928
981	18186	NRP1	8004	positive regulation of actin cytoskeleton reorganization	GO:2000251	biological process	32	3	0.3279	0.3056	0.2939	0.3962	0.03337	0.2442	0.4402	0.2168	0.4308	0.2076	0.4161
982	18186	NRP1	8004	positive regulation of stress fiber assembly	GO:0051496	biological process	32	3	0.353	0.3347	0.3196	0.3761	0.03858	0.2549	0.4887	0.2419	0.463	0.2148	0.4755
983	23936	LYNX1	29604	acetylcholine receptor inhibitor activity	GO:0030550	molecular function	8	4	0.08599	0.02032	0.00479	0.9388	0.01361	0.08287	0.08923	0.01661	0.02485	0.002109	0.01088
984	23936	LYNX1	29604	acetylcholine receptor regulator activity	GO:0030548	molecular function	8	4	0.08599	0.02382	0.01055	0.9036	0.01289	0.08287	0.08923	0.02164	0.02622	0.007047	0.01579
985	23936	LYNX1	29604	regulation of neurotransmitter receptor activity	GO:0099601	biological process	8	6	0.08599	0.02672	0.0161	0.8656	0.007015	0.08287	0.08923	0.02239	0.03189	0.01405	0.01846
986	23936	LYNX1	29604	anchored component of membrane	GO:0031225	cellular component	8	9	0.08599	0.02672	0.01796	0.8507	0.01224	0.08287	0.08923	0.02239	0.03189	0.01466	0.02199
987	23936	LYNX1	29604	acetylcholine receptor binding	GO:0033130	molecular function	8	2	0.08639	0.03336	0.03053	0.7724	0.008815	0.08387	0.08899	0.03086	0.03605	0.02633	0.0354
988	23936	LYNX1	29604	plasma membrane	GO:0005886	cellular component	8	52	0.09036	0.03738	0.03639	0.7475	0.01279	0.08119	0.1006	0.03136	0.04455	0.02928	0.04523
989	70683	UTP20	17897	RNA binding	GO:0003723	molecular function	7	43	0.2144	0.4793	0.1706	0.508	0.01527	0.188	0.2445	0.3758	0.6112	0.1403	0.2074
990	70683	UTP20	17897	plasma membrane	GO:0005886	cellular component	7	52	0.2883	0.4793	0.2512	0.4329	0.002104	0.2796	0.2974	0.3758	0.6112	0.2451	0.2575
991	70683	UTP20	17897	nucleolus	GO:0005730	cellular component	7	4	0.3017	0.4793	0.2652	0.4176	0.03769	0.2092	0.4353	0.3758	0.6112	0.1711	0.411
992	70683	UTP20	17897	protein binding	GO:0005515	molecular function	7	237	0.3629	0.4793	0.3323	0.3709	0.01277	0.3252	0.405	0.3758	0.6112	0.2916	0.3787
993	70683	UTP20	17897	small-subunit processome	GO:0032040	cellular component	7	2	0.4395	0.4793	0.4163	0.3136	0.02697	0.3518	0.5489	0.3758	0.6112	0.3266	0.5307
994	70683	UTP20	17897	90S preribosome	GO:0030686	cellular component	7	2	0.4445	0.4793	0.4221	0.3103	0.02533	0.361	0.5474	0.3758	0.6112	0.3367	0.5293
995	70683	UTP20	17897	rRNA processing	GO:0006364	biological process	7	14	0.5667	0.5515	0.5515	0.2292	0.04226	0.4264	0.7533	0.406	0.7492	0.406	0.7492
996	192786	RAPGEF6	20655	GTP-dependent protein binding	GO:0030742	molecular function	14	2	0.08662	0.1347	0.03293	0.7615	0.00859	0.08324	0.09014	0.1112	0.1633	0.02848	0.03808
997	192786	RAPGEF6	20655	endocytic vesicle	GO:0030139	cellular component	14	8	0.09301	0.1347	0.0361	0.7497	0.03614	0.08472	0.1021	0.1112	0.1633	0.01991	0.06547
998	192786	RAPGEF6	20655	apical plasma membrane	GO:0016324	cellular component	14	3	0.1111	0.1347	0.06365	0.6678	0.007398	0.1023	0.1205	0.1112	0.1633	0.05639	0.07185
999	192786	RAPGEF6	20655	plasma membrane	GO:0005886	cellular component	14	52	0.1138	0.1347	0.06555	0.6631	0.01988	0.09335	0.1387	0.1112	0.1633	0.04762	0.09023
1000	192786	RAPGEF6	20655	centrosome	GO:0005813	cellular component	14	9	0.1174	0.1347	0.07081	0.652	0.01243	0.1012	0.1362	0.1112	0.1633	0.05815	0.08622
1001	192786	RAPGEF6	20655	protein binding	GO:0005515	molecular function	14	237	0.1346	0.1347	0.08869	0.6176	0.01303	0.1151	0.1574	0.1112	0.1633	0.07256	0.1084
1002	192786	RAPGEF6	20655	cytosol	GO:0005829	cellular component	14	32	0.1397	0.1347	0.09451	0.6076	0.01227	0.1203	0.1624	0.1112	0.1633	0.07836	0.114
1003	192786	RAPGEF6	20655	protein localization to plasma membrane	GO:0072659	biological process	14	5	0.1465	0.1437	0.09938	0.5984	0.03122	0.1073	0.2	0.1124	0.1837	0.06205	0.1592
1004	192786	RAPGEF6	20655	positive regulation of GTPase activity	GO:0043547	biological process	14	4	0.1528	0.1437	0.1061	0.5878	0.03176	0.1104	0.2116	0.1124	0.1837	0.06541	0.1722
1005	192786	RAPGEF6	20655	phosphatidic acid binding	GO:0070300	molecular function	14	3	0.1537	0.1531	0.1055	0.5883	0.03494	0.107	0.2207	0.1387	0.1691	0.06274	0.1775
1006	192786	RAPGEF6	20655	guanyl-nucleotide exchange factor activity	GO:0005085	molecular function	14	3	0.1599	0.1595	0.109	0.5784	0.05761	0.09051	0.2825	0.1072	0.2374	0.04725	0.2515
1007	192786	RAPGEF6	20655	small GTPase binding	GO:0031267	molecular function	14	2	0.1904	0.163	0.1462	0.5359	0.01326	0.17	0.2132	0.1566	0.1698	0.1217	0.1756
1008	192786	RAPGEF6	20655	microvillus assembly	GO:0030033	biological process	14	3	0.2043	0.1739	0.1605	0.5194	0.01024	0.1846	0.226	0.1588	0.1904	0.1398	0.1842
1009	60599	TP53INP1	18022	positive regulation of transcription, DNA-templated	GO:0045893	biological process	8	28	0.2848	0.5227	0.2468	0.4325	0.03997	0.1949	0.4161	0.4003	0.6825	0.1572	0.3875
1010	60599	TP53INP1	18022	nucleus	GO:0005634	cellular component	8	48	0.3158	0.5227	0.2811	0.4084	0.01444	0.2738	0.3644	0.4003	0.6825	0.2401	0.3291
1011	60599	TP53INP1	18022	autophagosome	GO:0005776	cellular component	8	4	0.3665	0.5227	0.3338	0.3655	0.04124	0.2584	0.5197	0.4003	0.6825	0.2237	0.4982
1012	60599	TP53INP1	18022	protein binding	GO:0005515	molecular function	8	237	0.3815	0.5227	0.3535	0.355	0.02449	0.3055	0.4764	0.4003	0.6825	0.2748	0.4548
1013	60599	TP53INP1	18022	cytosol	GO:0005829	cellular component	8	32	0.3946	0.5227	0.3683	0.3458	0.01831	0.335	0.4649	0.4003	0.6825	0.3078	0.4407
1014	60599	TP53INP1	18022	autophagosome assembly	GO:0000045	biological process	8	3	0.4382	0.5474	0.4119	0.3071	0.06033	0.274	0.701	0.3854	0.7775	0.2436	0.6964
1015	60599	TP53INP1	18022	positive regulation of autophagy	GO:0010508	biological process	8	8	0.4458	0.5228	0.4236	0.3107	0.0154	0.3892	0.5107	0.4005	0.6825	0.3669	0.4891
1016	60599	TP53INP1	18022	autophagic cell death	GO:0048102	biological process	8	3	0.797	0.7922	0.7922	0.08816	0.03742	0.6697	0.9486	0.6627	0.947	0.6627	0.947
1017	106618	WDR90	26960	centriole	GO:0005814	cellular component	4	4	0.08599	0.04368	0.01456	0.8754	0.01323	0.08287	0.08923	0.03313	0.05759	0.01104	0.0192
1018	106618	WDR90	26960	cilium assembly	GO:0060271	biological process	4	9	0.09411	0.06509	0.04339	0.7227	0.008128	0.08811	0.1005	0.05647	0.07503	0.03765	0.05002
1019	106618	WDR90	26960	protein binding	GO:0005515	molecular function	4	237	0.1289	0.0825	0.0825	0.6288	0.002633	0.1219	0.1362	0.07921	0.08593	0.07921	0.08593
1020	233744	SPON1	11252	collagen-containing extracellular matrix	GO:0062023	cellular component	5	14	0.08868	0.1626	0.03522	0.752	0.007782	0.08577	0.09169	0.1301	0.2031	0.03089	0.04017
1021	233744	SPON1	11252	extracellular matrix	GO:0031012	cellular component	5	14	0.1148	0.1648	0.06592	0.6623	0.01538	0.1002	0.1315	0.1287	0.211	0.05148	0.08441
1022	233744	SPON1	11252	extracellular space	GO:0005615	cellular component	5	17	0.246	0.3134	0.2041	0.4726	0.03063	0.183	0.3306	0.2359	0.4164	0.1416	0.2943
1023	233744	SPON1	11252	cell adhesion	GO:0007155	biological process	5	13	0.3392	0.3424	0.3047	0.3878	0.03355	0.2548	0.4515	0.26	0.451	0.2104	0.4413
1024	233744	SPON1	11252	protein binding	GO:0005515	molecular function	5	237	0.3973	0.3863	0.3712	0.3442	0.01404	0.3498	0.4512	0.3579	0.4168	0.3234	0.426
1025	72852	MBLAC2	33711	extracellular exosome	GO:0070062	cellular component	2	24	0.1599	0.1434	0.1133	0.5786	0.01695	0.1335	0.1916	0.1227	0.1676	0.08856	0.1449
1026	72852	MBLAC2	33711	protein binding	GO:0005515	molecular function	2	237	0.1885	0.1434	0.1434	0.5394	0.01121	0.1651	0.2152	0.1227	0.1676	0.1227	0.1676
1027	101809	SPRED3	31041	inactivation of MAPK activity	GO:0000188	biological process	5	7	0.1358	0.1827	0.08446	0.6228	0.03983	0.09742	0.1893	0.1458	0.229	0.04571	0.1561
1028	101809	SPRED3	31041	regulation of protein deacetylation	GO:0090311	biological process	5	5	0.1487	0.1827	0.1035	0.5933	0.01505	0.1253	0.1765	0.1458	0.229	0.0824	0.1299
1029	101809	SPRED3	31041	negative regulation of peptidyl-threonine phosphorylation	GO:0010801	biological process	5	3	0.1665	0.1848	0.1197	0.5688	0.02403	0.1311	0.2116	0.1453	0.235	0.08498	0.1687
1030	101809	SPRED3	31041	protein kinase binding	GO:0019901	molecular function	5	21	0.2027	0.1848	0.1586	0.5216	0.01	0.181	0.2269	0.1453	0.235	0.1386	0.1814
1031	101809	SPRED3	31041	positive regulation of DNA damage response, signal transduction by p53 class mediator	GO:0043517	biological process	5	5	0.2239	0.187	0.1803	0.4967	0.02493	0.1728	0.2901	0.1446	0.2418	0.1301	0.2498
1032	14131	FCGR2A	3616	cell surface receptor signaling pathway	GO:0007166	biological process	11	31	0.08599	0.1152	0.01943	0.8378	0.02396	0.08287	0.08923	0.08887	0.1494	0.01307	0.02888
1033	14131	FCGR2A	3616	integral component of plasma membrane	GO:0005887	cellular component	11	31	0.09775	0.1214	0.04713	0.7104	0.02165	0.08557	0.1117	0.08951	0.1646	0.03272	0.06788
1034	14131	FCGR2A	3616	transmembrane signaling receptor activity	GO:0004888	molecular function	11	37	0.1172	0.1253	0.06473	0.6634	0.03619	0.08633	0.1592	0.08881	0.1768	0.03621	0.1157
1035	14131	FCGR2A	3616	plasma membrane	GO:0005886	cellular component	11	52	0.1268	0.1282	0.07963	0.6343	0.00548	0.1242	0.1294	0.1027	0.1601	0.07315	0.08668
1036	14131	FCGR2A	3616	Golgi apparatus	GO:0005794	cellular component	11	12	0.1416	0.1308	0.09557	0.6058	0.01078	0.1273	0.1576	0.1089	0.1572	0.08095	0.1128
1037	14131	FCGR2A	3616	protein binding	GO:0005515	molecular function	11	237	0.1872	0.1577	0.1423	0.5407	0.01273	0.1617	0.2167	0.1357	0.1832	0.119	0.1701
1038	14131	FCGR2A	3616	regulation of immune response	GO:0050776	biological process	11	29	0.2086	0.181	0.1502	0.5164	0.07987	0.1021	0.4262	0.08475	0.3866	0.04982	0.4529
1039	269400	RTEL1	15888	telomeric loop disassembly	GO:0090657	biological process	13	3	0.0984	0.396	0.04499	0.7166	0.03357	0.07354	0.1317	0.2279	0.6883	0.02571	0.07873
1040	269400	RTEL1	15888	negative regulation of DNA recombination	GO:0045910	biological process	13	14	0.1621	0.396	0.1139	0.5739	0.04363	0.1027	0.2558	0.2279	0.6883	0.06103	0.2127
1041	269400	RTEL1	15888	negative regulation of t-circle formation	GO:1904430	biological process	13	4	0.1846	0.396	0.1389	0.5416	0.03818	0.1249	0.2729	0.2279	0.6883	0.08354	0.2308
1042	269400	RTEL1	15888	telomere maintenance	GO:0000723	biological process	13	12	0.1981	0.396	0.1528	0.5266	0.02736	0.1493	0.2629	0.2279	0.6883	0.1066	0.2189
1043	269400	RTEL1	15888	nucleus	GO:0005634	cellular component	13	48	0.2381	0.396	0.1951	0.4788	0.04328	0.1574	0.3603	0.2279	0.6883	0.1165	0.3267
1044	269400	RTEL1	15888	DNA polymerase binding	GO:0070182	molecular function	13	2	0.2415	0.3969	0.1969	0.4722	0.0609	0.1339	0.4356	0.2287	0.6888	0.09325	0.4157
1045	269400	RTEL1	15888	regulation of double-strand break repair via homologous recombination	GO:0010569	biological process	13	6	0.2691	0.396	0.2267	0.4441	0.06263	0.1525	0.4746	0.2279	0.6883	0.1138	0.4518
1046	269400	RTEL1	15888	protein binding	GO:0005515	molecular function	13	237	0.2899	0.3969	0.249	0.4245	0.06287	0.1648	0.5099	0.2287	0.6888	0.1268	0.4892
1047	269400	RTEL1	15888	DNA helicase activity	GO:0003678	molecular function	13	9	0.3831	0.4376	0.3517	0.3507	0.05003	0.2536	0.5788	0.2797	0.6848	0.2202	0.5617
1048	269400	RTEL1	15888	DNA duplex unwinding	GO:0032508	biological process	13	4	0.4254	0.4492	0.3986	0.3168	0.05741	0.2683	0.6745	0.2925	0.6898	0.2372	0.6699
1049	269400	RTEL1	15888	positive regulation of telomere maintenance via telomere lengthening	GO:1904358	biological process	13	4	0.4367	0.4529	0.4122	0.3138	0.03777	0.3246	0.5873	0.2997	0.6843	0.2959	0.5742
1050	269400	RTEL1	15888	positive regulation of telomere capping	GO:1904355	biological process	13	3	0.4395	0.4529	0.414	0.3113	0.04306	0.3151	0.613	0.2997	0.6843	0.2844	0.6028
1051	269400	RTEL1	15888	ATP binding	GO:0005524	molecular function	13	4	0.441	0.4568	0.4125	0.3043	0.06635	0.2687	0.7237	0.2972	0.7022	0.2349	0.7243
1052	217366	LRRC45	28302	centrosome	GO:0005813	cellular component	5	9	0.1214	0.1308	0.06711	0.6573	0.04628	0.08334	0.1768	0.115	0.1488	0.03158	0.1426
1053	217366	LRRC45	28302	plasma membrane	GO:0005886	cellular component	5	52	0.1417	0.1308	0.09384	0.6088	0.01387	0.1269	0.1582	0.115	0.1488	0.07577	0.1162
1054	217366	LRRC45	28302	nucleoplasm	GO:0005654	cellular component	5	26	0.1494	0.1308	0.1032	0.5935	0.01792	0.1239	0.18	0.115	0.1488	0.07855	0.1357
1055	217366	LRRC45	28302	cytosol	GO:0005829	cellular component	5	32	0.1617	0.1308	0.1165	0.5737	0.01763	0.1328	0.1968	0.115	0.1488	0.09016	0.1507
1056	217366	LRRC45	28302	protein binding	GO:0005515	molecular function	5	237	0.1728	0.1308	0.1273	0.56	0.005505	0.1607	0.1859	0.115	0.1488	0.1177	0.1376
1057	27059	SH3D19	30418	plasma membrane	GO:0005886	cellular component	7	52	0.2731	0.4066	0.2349	0.4466	0.007132	0.2542	0.2933	0.3347	0.4939	0.2159	0.2556
1058	27059	SH3D19	30418	nucleoplasm	GO:0005654	cellular component	7	26	0.2808	0.4066	0.2413	0.4372	0.03985	0.1942	0.4059	0.3347	0.4939	0.1536	0.379
1059	27059	SH3D19	30418	cytoskeleton organization	GO:0007010	biological process	7	12	0.2871	0.4066	0.2484	0.4319	0.03661	0.2043	0.4034	0.3347	0.4939	0.1607	0.3838
1060	27059	SH3D19	30418	cytosol	GO:0005829	cellular component	7	32	0.3318	0.4066	0.2979	0.3932	0.0338	0.2462	0.4472	0.3347	0.4939	0.2101	0.4224
1061	27059	SH3D19	30418	positive regulation of membrane protein ectodomain proteolysis	GO:0051044	biological process	7	5	0.3592	0.4066	0.3278	0.3733	0.02125	0.2993	0.4312	0.3347	0.4939	0.264	0.4069
1062	27059	SH3D19	30418	protein binding	GO:0005515	molecular function	7	237	0.3869	0.4066	0.36	0.3517	0.0139	0.3399	0.4404	0.3347	0.4939	0.3133	0.4138
1063	27059	SH3D19	30418	regulation of cell morphogenesis	GO:0022604	biological process	7	10	0.5234	0.5131	0.5019	0.2493	0.06455	0.3379	0.8108	0.3284	0.8016	0.311	0.8099
1064	228911	TSHZ2	13010	DNA-binding transcription factor activity, RNA polymerase II-specific	GO:0000981	molecular function	5	13	0.08599	0.06413	0.01538	0.8695	0.01454	0.08287	0.08923	0.05498	0.07482	0.01161	0.02036
1065	228911	TSHZ2	13010	regulation of transcription by RNA polymerase II	GO:0006357	biological process	5	42	0.08896	0.06413	0.03616	0.7482	0.009505	0.082	0.09651	0.05498	0.07482	0.03078	0.04247
1066	228911	TSHZ2	13010	DNA binding	GO:0003677	molecular function	5	24	0.09003	0.06413	0.03704	0.745	0.009506	0.08086	0.1002	0.05498	0.07482	0.0315	0.04356
1067	228911	TSHZ2	13010	nucleus	GO:0005634	cellular component	5	48	0.1152	0.08425	0.0674	0.6591	0.02026	0.09477	0.14	0.06077	0.1168	0.04862	0.09345
1068	228911	TSHZ2	13010	protein binding	GO:0005515	molecular function	5	237	0.1509	0.1056	0.1056	0.5902	0.01301	0.1305	0.1745	0.08661	0.1287	0.08661	0.1287
1069	15560	HTR2C	5295	phospholipase C-activating serotonin receptor signaling pathway	GO:0007208	biological process	22	3	0.08599	0.0609	0.01189	0.8949	0.01135	0.08287	0.08923	0.04848	0.07649	0.008387	0.01687
1070	15560	HTR2C	5295	Gq/11-coupled serotonin receptor activity	GO:0001587	molecular function	22	2	0.08599	0.0609	0.01222	0.8928	0.01346	0.08287	0.08923	0.04848	0.07649	0.00887	0.01683
1071	15560	HTR2C	5295	G protein-coupled serotonin receptor activity	GO:0004993	molecular function	22	5	0.08599	0.0609	0.01928	0.8387	0.02055	0.08287	0.08923	0.04848	0.07649	0.01359	0.02735
1072	15560	HTR2C	5295	G protein-coupled serotonin receptor signaling pathway	GO:0098664	biological process	22	5	0.08599	0.0609	0.01948	0.8355	0.0245	0.08287	0.08923	0.04848	0.07649	0.01261	0.0301
1073	15560	HTR2C	5295	phospholipase C-activating G protein-coupled receptor signaling pathway	GO:0007200	biological process	22	10	0.08599	0.0609	0.02041	0.8312	0.01646	0.08287	0.08923	0.04848	0.07649	0.01561	0.02668
1074	15560	HTR2C	5295	neurotransmitter receptor activity	GO:0030594	molecular function	22	9	0.08599	0.0609	0.02216	0.8198	0.01107	0.08287	0.08923	0.04848	0.07649	0.01861	0.0264
1075	15560	HTR2C	5295	dendrite	GO:0030425	cellular component	22	13	0.08655	0.0609	0.02712	0.7898	0.01362	0.08245	0.09086	0.04848	0.07649	0.02165	0.03397
1076	15560	HTR2C	5295	G protein-coupled receptor signaling pathway, coupled to cyclic nucleotide second messenger	GO:0007187	biological process	22	3	0.08668	0.0609	0.02944	0.7779	0.01655	0.08236	0.09122	0.04848	0.07649	0.02242	0.03867
1077	15560	HTR2C	5295	integral component of plasma membrane	GO:0005887	cellular component	22	31	0.08773	0.06181	0.0301	0.7742	0.01579	0.08591	0.08959	0.0489	0.07813	0.0231	0.03923
1078	15560	HTR2C	5295	chemical synaptic transmission	GO:0007268	biological process	22	18	0.09078	0.06363	0.03914	0.7371	0.007462	0.08254	0.09985	0.05438	0.07445	0.03449	0.04441
1079	15560	HTR2C	5295	identical protein binding	GO:0042802	molecular function	22	14	0.0913	0.06266	0.03885	0.7386	0.01233	0.08576	0.09721	0.04915	0.07989	0.03136	0.04812
1080	15560	HTR2C	5295	cellular calcium ion homeostasis	GO:0006874	biological process	22	12	0.0951	0.06272	0.04231	0.7267	0.01536	0.08553	0.1057	0.04914	0.08006	0.03246	0.05514
1081	15560	HTR2C	5295	1-(4-iodo-2,5-dimethoxyphenyl)propan-2-amine binding	GO:0071886	molecular function	22	3	0.09707	0.06676	0.03837	0.7397	0.03981	0.07438	0.1267	0.04541	0.09814	0.0197	0.07473
1082	15560	HTR2C	5295	serotonin binding	GO:0051378	molecular function	22	5	0.09892	0.06676	0.03932	0.7359	0.04517	0.07316	0.1338	0.04541	0.09814	0.01859	0.08318
1083	15560	HTR2C	5295	release of sequestered calcium ion into cytosol	GO:0051209	biological process	22	8	0.1029	0.0705	0.04037	0.7311	0.0559	0.07004	0.1511	0.04335	0.1147	0.01607	0.1014
1084	15560	HTR2C	5295	positive regulation of phosphatidylinositol biosynthetic process	GO:0010513	biological process	22	4	0.1062	0.07676	0.05648	0.6848	0.02248	0.08926	0.1263	0.0655	0.08995	0.03914	0.0815
1085	15560	HTR2C	5295	cGMP-mediated signaling	GO:0019934	biological process	22	3	0.1106	0.0727	0.05407	0.6893	0.04743	0.0775	0.1577	0.04514	0.1171	0.02483	0.1177
1086	15560	HTR2C	5295	plasma membrane	GO:0005886	cellular component	22	52	0.1124	0.07993	0.06254	0.6698	0.02334	0.09343	0.1353	0.06365	0.1004	0.04299	0.09099
1087	15560	HTR2C	5295	G protein-coupled serotonin receptor complex	GO:0098666	cellular component	22	2	0.1163	0.08466	0.06859	0.6567	0.007903	0.104	0.13	0.07336	0.0977	0.06042	0.07785
1088	15560	HTR2C	5295	response to drug	GO:0042493	biological process	22	13	0.1371	0.1001	0.09075	0.6133	0.02459	0.1049	0.179	0.07591	0.1319	0.06261	0.1315
1089	15560	HTR2C	5295	positive regulation of ERK1 and ERK2 cascade	GO:0070374	biological process	22	6	0.1405	0.1097	0.08395	0.6197	0.06124	0.08347	0.2367	0.06206	0.1939	0.03268	0.2157
1090	15560	HTR2C	5295	protein binding	GO:0005515	molecular function	22	237	0.1837	0.1423	0.1356	0.5462	0.03449	0.1334	0.253	0.09517	0.2129	0.08265	0.2223
1091	238384	SLC24A4	10978	sodium ion transmembrane transport	GO:0035725	biological process	16	8	0.08599	0.01951	0.006614	0.9281	0.01188	0.08287	0.08923	0.0152	0.02504	0.003298	0.01326
1092	238384	SLC24A4	10978	calcium ion transmembrane transport	GO:0070588	biological process	16	12	0.08599	0.01951	0.007056	0.9197	0.01758	0.08287	0.08923	0.0152	0.02504	0.002691	0.0185
1093	238384	SLC24A4	10978	potassium ion transmembrane transport	GO:0071805	biological process	16	9	0.08599	0.02026	0.009697	0.9116	0.008267	0.08287	0.08923	0.01698	0.02417	0.007335	0.01282
1094	238384	SLC24A4	10978	integral component of plasma membrane	GO:0005887	cellular component	16	31	0.08599	0.02026	0.01195	0.8969	0.007968	0.08287	0.08923	0.01698	0.02417	0.009751	0.01465
1095	238384	SLC24A4	10978	calcium channel activity	GO:0005262	molecular function	16	8	0.08599	0.02026	0.01259	0.8932	0.002409	0.08287	0.08923	0.01698	0.02417	0.01186	0.01337
1096	238384	SLC24A4	10978	plasma membrane	GO:0005886	cellular component	16	52	0.08599	0.02031	0.01626	0.8645	0.006157	0.08287	0.08923	0.01699	0.02428	0.01463	0.01807
1097	238384	SLC24A4	10978	calcium, potassium:sodium antiporter activity	GO:0008273	molecular function	16	3	0.08599	0.02047	0.0181	0.8497	0.004468	0.08287	0.08923	0.01696	0.02472	0.01683	0.01947
1098	238384	SLC24A4	10978	cellular calcium ion homeostasis	GO:0006874	biological process	16	12	0.08599	0.02107	0.01826	0.8469	0.02054	0.08287	0.08923	0.01668	0.02662	0.01299	0.02566
1099	238384	SLC24A4	10978	sensory perception of smell	GO:0007608	biological process	16	2	0.08599	0.02164	0.01972	0.8353	0.01803	0.08287	0.08923	0.01697	0.02758	0.01453	0.02676
1100	56631	TRIM17	13430	protein autoubiquitination	GO:0051865	biological process	11	2	0.08599	0.1089	0.01883	0.8399	0.02205	0.08287	0.08923	0.06942	0.171	0.01261	0.02811
1101	56631	TRIM17	13430	ubiquitin protein ligase activity	GO:0061630	molecular function	11	7	0.08599	0.1089	0.02363	0.8096	0.01489	0.08287	0.08923	0.06942	0.171	0.01863	0.02998
1102	56631	TRIM17	13430	ubiquitin-protein transferase activity	GO:0004842	molecular function	11	8	0.09112	0.1089	0.03171	0.7684	0.03986	0.08511	0.09754	0.06942	0.171	0.01639	0.06132
1103	56631	TRIM17	13430	protein ubiquitination	GO:0016567	biological process	11	10	0.1067	0.1201	0.05722	0.6827	0.02265	0.08941	0.1273	0.09147	0.1577	0.03954	0.08281
1104	56631	TRIM17	13430	cytoplasm	GO:0005737	cellular component	11	35	0.1098	0.1252	0.05974	0.6764	0.02181	0.09763	0.1234	0.09383	0.167	0.04148	0.08605
1105	56631	TRIM17	13430	protein binding	GO:0005515	molecular function	11	237	0.1123	0.1252	0.06357	0.6679	0.01478	0.103	0.1224	0.09383	0.167	0.04998	0.08087
1106	56631	TRIM17	13430	regulation of gene expression	GO:0010468	biological process	11	23	0.1509	0.161	0.1035	0.5933	0.01387	0.1351	0.1685	0.1311	0.1978	0.08357	0.1281
1107	56631	TRIM17	13430	protein-macromolecule adaptor activity	GO:0030674	molecular function	11	15	0.2622	0.2687	0.2208	0.454	0.04598	0.1722	0.3992	0.1746	0.4135	0.1309	0.3725
1108	56631	TRIM17	13430	autophagy	GO:0006914	biological process	11	10	0.2892	0.2904	0.2382	0.4173	0.1013	0.1252	0.6681	0.1273	0.6625	0.08585	0.6608
1109	56631	TRIM17	13430	regulation of protein localization	GO:0032880	biological process	11	7	0.302	0.2936	0.266	0.4172	0.03719	0.213	0.4281	0.2039	0.4225	0.175	0.4043
1110	56631	TRIM17	13430	innate immune response	GO:0045087	biological process	11	18	0.3491	0.3335	0.3173	0.3798	0.0288	0.2731	0.4463	0.2592	0.4292	0.2368	0.4253
1111	80982	CEMIP	29213	clathrin-coated endocytic vesicle	GO:0045334	cellular component	16	4	0.2331	0.567	0.1912	0.4867	0.0135	0.2084	0.2607	0.4297	0.7483	0.1612	0.2267
1112	80982	CEMIP	29213	clathrin heavy chain binding	GO:0032050	molecular function	16	2	0.2741	0.567	0.2339	0.4449	0.03259	0.2038	0.3685	0.4297	0.7483	0.1601	0.3418
1113	80982	CEMIP	29213	positive regulation of release of sequestered calcium ion into cytosol	GO:0051281	biological process	16	6	0.2755	0.567	0.2347	0.4433	0.0369	0.1967	0.3858	0.4297	0.7483	0.1509	0.3651
1114	80982	CEMIP	29213	plasma membrane	GO:0005886	cellular component	16	52	0.3028	0.567	0.266	0.4191	0.02528	0.2425	0.3781	0.4297	0.7483	0.2005	0.3528
1115	80982	CEMIP	29213	cytoplasm	GO:0005737	cellular component	16	35	0.3138	0.567	0.2771	0.41	0.02661	0.2492	0.3952	0.4297	0.7483	0.2048	0.3751
1116	80982	CEMIP	29213	protein binding	GO:0005515	molecular function	16	237	0.3274	0.567	0.2931	0.399	0.01687	0.2839	0.3775	0.4297	0.7483	0.2433	0.3529
1117	80982	CEMIP	29213	positive regulation of peptidyl-threonine phosphorylation	GO:0010800	biological process	16	3	0.3292	0.567	0.296	0.396	0.02509	0.2615	0.4144	0.4297	0.7483	0.2259	0.3877
1118	80982	CEMIP	29213	endoplasmic reticulum	GO:0005783	cellular component	16	18	0.335	0.567	0.3011	0.3928	0.02027	0.2848	0.3941	0.4297	0.7483	0.2434	0.3724
1119	80982	CEMIP	29213	positive regulation of protein kinase C activity	GO:1900020	biological process	16	3	0.3469	0.5759	0.3139	0.38	0.0399	0.2441	0.4931	0.4234	0.7834	0.2082	0.4733
1120	80982	CEMIP	29213	positive regulation of cell migration	GO:0030335	biological process	16	28	0.4327	0.6007	0.4048	0.3141	0.05346	0.2734	0.6849	0.4583	0.7874	0.2396	0.6839
1121	80982	CEMIP	29213	positive regulation of protein targeting to membrane	GO:0090314	biological process	16	5	0.4364	0.5763	0.4028	0.3074	0.07341	0.2458	0.7746	0.4231	0.7849	0.2049	0.7917
1122	80982	CEMIP	29213	sensory perception of sound	GO:0007605	biological process	16	5	0.4532	0.587	0.4317	0.3058	0.01465	0.4011	0.5121	0.4401	0.7828	0.3788	0.4921
1123	80982	CEMIP	29213	ER retention sequence binding	GO:0046923	molecular function	16	5	0.5078	0.5873	0.4859	0.2585	0.0653	0.325	0.7933	0.4398	0.7843	0.2999	0.7872
1124	80982	CEMIP	29213	hyalurononglucosaminidase activity	GO:0004415	molecular function	16	2	0.526	0.5918	0.5076	0.2562	0.03725	0.4019	0.6883	0.4463	0.7849	0.3817	0.675
1125	80982	CEMIP	29213	hyaluronic acid binding	GO:0005540	molecular function	16	2	0.5679	0.6242	0.55	0.2256	0.05355	0.3947	0.8171	0.4864	0.8011	0.3686	0.8206
1126	80982	CEMIP	29213	hyaluronan catabolic process	GO:0030214	biological process	16	3	0.782	0.7959	0.776	0.09985	0.03498	0.6732	0.9084	0.6894	0.9188	0.6647	0.9059
1127	269437	PLCH1	29185	intracellular membrane-bounded organelle	GO:0043231	cellular component	6	39	0.08599	0.09018	0.02248	0.818	0.02882	0.08287	0.08923	0.06667	0.122	0.01404	0.03598
1128	269437	PLCH1	29185	cytoplasm	GO:0005737	cellular component	6	35	0.09495	0.09483	0.04453	0.7192	0.004007	0.08854	0.1018	0.06925	0.1299	0.04142	0.04788
1129	269437	PLCH1	29185	phosphatidylinositol-mediated signaling	GO:0048015	biological process	6	3	0.1264	0.1124	0.07373	0.6425	0.04577	0.08383	0.1907	0.06194	0.2041	0.03594	0.1512
1130	269437	PLCH1	29185	calcium-dependent phospholipase C activity	GO:0050429	molecular function	6	2	0.1733	0.1302	0.1265	0.5586	0.03185	0.1288	0.2331	0.08656	0.1958	0.08146	0.1963
1131	269437	PLCH1	29185	phosphatidylinositol phospholipase C activity	GO:0004435	molecular function	6	2	0.1762	0.1302	0.1299	0.5545	0.0294	0.134	0.2318	0.08656	0.1958	0.08678	0.1943
1132	224697	ADAMTS10	13201	collagen-containing extracellular matrix	GO:0062023	cellular component	6	14	0.08854	0.1034	0.03462	0.7544	0.008133	0.08567	0.09151	0.0902	0.1186	0.03016	0.03973
1133	224697	ADAMTS10	13201	extracellular matrix	GO:0031012	cellular component	6	14	0.1023	0.1034	0.0526	0.696	0.01056	0.09517	0.11	0.0902	0.1186	0.04426	0.06251
1134	224697	ADAMTS10	13201	metalloendopeptidase activity	GO:0004222	molecular function	6	5	0.1058	0.1034	0.05506	0.6886	0.0221	0.08842	0.1267	0.0902	0.1186	0.03832	0.07912
1135	224697	ADAMTS10	13201	extracellular matrix organization	GO:0030198	biological process	6	15	0.1206	0.1147	0.07341	0.6467	0.003682	0.115	0.1266	0.1089	0.1208	0.06919	0.07789
1136	224697	ADAMTS10	13201	microfibril	GO:0001527	cellular component	6	2	0.2149	0.2053	0.1711	0.5052	0.03157	0.1545	0.299	0.1343	0.3138	0.1119	0.2615
1137	224697	ADAMTS10	13201	protein binding	GO:0005515	molecular function	6	237	0.3456	0.3144	0.3144	0.3833	0.01667	0.2971	0.402	0.2643	0.374	0.2643	0.374
1138	20563	SLIT2	11086	chemorepulsion involved in postnatal olfactory bulb interneuron migration	GO:0021836	biological process	45	2	0.08656	0.3373	0.02813	0.785	0.01782	0.08245	0.09086	0.2321	0.4901	0.02109	0.03751
1139	20563	SLIT2	11086	retinal ganglion cell axon guidance	GO:0031290	biological process	45	2	0.08812	0.3373	0.03047	0.773	0.0197	0.08116	0.09567	0.2321	0.4901	0.02201	0.04216
1140	20563	SLIT2	11086	corticospinal neuron axon guidance through spinal cord	GO:0021972	biological process	45	2	0.08831	0.3373	0.03081	0.7714	0.01831	0.081	0.09629	0.2321	0.4901	0.02273	0.04176
1141	20563	SLIT2	11086	motor neuron axon guidance	GO:0008045	biological process	45	3	0.0907	0.3373	0.03596	0.7495	0.02074	0.079	0.1041	0.2321	0.4901	0.02524	0.05125
1142	20563	SLIT2	11086	proteoglycan binding	GO:0043394	molecular function	45	6	0.09977	0.3375	0.04833	0.7072	0.02344	0.08276	0.1203	0.232	0.4911	0.03249	0.07189
1143	20563	SLIT2	11086	negative regulation of smooth muscle cell migration	GO:0014912	biological process	45	5	0.1105	0.3544	0.06158	0.6716	0.02628	0.08694	0.1405	0.2438	0.5151	0.03988	0.09509
1144	20563	SLIT2	11086	ureteric bud development	GO:0001657	biological process	45	2	0.1232	0.3529	0.06387	0.6608	0.06674	0.07123	0.2132	0.238	0.5232	0.02259	0.1806
1145	20563	SLIT2	11086	identical protein binding	GO:0042802	molecular function	45	14	0.126	0.3761	0.07737	0.6368	0.03452	0.08883	0.1788	0.2842	0.4978	0.04527	0.1322
1146	20563	SLIT2	11086	negative regulation of smooth muscle cell chemotaxis	GO:0071672	biological process	45	4	0.1367	0.3788	0.08972	0.6139	0.03363	0.09541	0.1958	0.2824	0.5081	0.05415	0.1487
1147	20563	SLIT2	11086	axon guidance	GO:0007411	biological process	45	24	0.158	0.3858	0.1122	0.5807	0.007397	0.1435	0.1738	0.3016	0.4935	0.1004	0.1252
1148	20563	SLIT2	11086	apoptotic process involved in luteolysis	GO:0061364	biological process	45	5	0.1652	0.3858	0.1196	0.5703	0.009386	0.149	0.1831	0.3016	0.4935	0.1044	0.137
1149	20563	SLIT2	11086	cell migration involved in sprouting angiogenesis	GO:0002042	biological process	45	3	0.1708	0.4037	0.124	0.563	0.02245	0.1398	0.2088	0.3208	0.5079	0.08978	0.1713
1150	20563	SLIT2	11086	Roundabout signaling pathway	GO:0035385	biological process	45	5	0.1735	0.3788	0.1256	0.5572	0.04581	0.1087	0.277	0.2824	0.5081	0.06516	0.2423
1151	20563	SLIT2	11086	negative regulation of neutrophil chemotaxis	GO:0090024	biological process	45	4	0.1939	0.3886	0.1487	0.5313	0.02858	0.1444	0.2603	0.2996	0.504	0.1019	0.2169
1152	20563	SLIT2	11086	negative regulation of leukocyte chemotaxis	GO:0002689	biological process	45	10	0.2004	0.3886	0.1553	0.5238	0.02608	0.1525	0.2633	0.2996	0.504	0.1101	0.219
1153	20563	SLIT2	11086	negative regulation of cell migration	GO:0030336	biological process	45	28	0.2174	0.401	0.1716	0.5015	0.04921	0.1347	0.3509	0.2908	0.553	0.09325	0.3157
1154	20563	SLIT2	11086	negative regulation of mononuclear cell migration	GO:0071676	biological process	45	7	0.2264	0.3988	0.1836	0.4923	0.03168	0.1642	0.3122	0.2923	0.544	0.1224	0.2754
1155	20563	SLIT2	11086	positive regulation of apoptotic process	GO:0043065	biological process	45	24	0.2363	0.4311	0.183	0.46	0.1199	0.0833	0.6703	0.2715	0.6847	0.05067	0.661
1156	20563	SLIT2	11086	branching morphogenesis of an epithelial tube	GO:0048754	biological process	45	10	0.2394	0.4221	0.193	0.4764	0.06044	0.1392	0.4117	0.3301	0.5396	0.09507	0.3918
1157	20563	SLIT2	11086	axon extension involved in axon guidance	GO:0048846	biological process	45	4	0.2402	0.4108	0.1965	0.4795	0.03137	0.18	0.3205	0.3224	0.5233	0.1323	0.2919
1158	20563	SLIT2	11086	negative regulation of protein phosphorylation	GO:0001933	biological process	45	16	0.2453	0.4108	0.2032	0.474	0.02496	0.1961	0.3067	0.3224	0.5233	0.15	0.2753
1159	20563	SLIT2	11086	protein homodimerization activity	GO:0042803	molecular function	45	10	0.2463	0.4106	0.2046	0.4718	0.03146	0.179	0.3387	0.3105	0.5431	0.1371	0.3051
1160	20563	SLIT2	11086	response to cortisol	GO:0051414	biological process	45	6	0.2549	0.4219	0.2147	0.4632	0.02569	0.2	0.3249	0.3165	0.5624	0.1568	0.294
1161	20563	SLIT2	11086	GTPase inhibitor activity	GO:0005095	molecular function	45	3	0.2865	0.4254	0.2494	0.4337	0.01641	0.2448	0.3353	0.3234	0.5594	0.2066	0.3011
1162	20563	SLIT2	11086	negative regulation of actin filament polymerization	GO:0030837	biological process	45	8	0.2977	0.4486	0.2601	0.4231	0.02984	0.2286	0.3875	0.3987	0.5047	0.1871	0.3616
1163	20563	SLIT2	11086	heparin binding	GO:0008201	molecular function	45	6	0.3031	0.4305	0.2667	0.4177	0.03091	0.229	0.4012	0.3226	0.5743	0.1869	0.3805
1164	20563	SLIT2	11086	induction of negative chemotaxis	GO:0050929	biological process	45	2	0.309	0.4362	0.2731	0.4137	0.02329	0.2489	0.3836	0.3394	0.5607	0.212	0.3518
1165	20563	SLIT2	11086	Roundabout binding	GO:0048495	molecular function	45	3	0.3124	0.4282	0.2751	0.4083	0.04477	0.2081	0.4689	0.3185	0.5757	0.1649	0.4587
1166	20563	SLIT2	11086	negative regulation of endothelial cell migration	GO:0010596	biological process	45	5	0.3164	0.4266	0.2808	0.4041	0.0433	0.2149	0.4659	0.3138	0.5798	0.1776	0.444
1167	20563	SLIT2	11086	cellular response to hormone stimulus	GO:0032870	biological process	45	20	0.3389	0.4387	0.3044	0.387	0.0395	0.2395	0.4795	0.3252	0.5918	0.1976	0.4689
1168	20563	SLIT2	11086	cellular response to heparin	GO:0071504	biological process	45	4	0.3399	0.4537	0.3018	0.3756	0.07957	0.1775	0.651	0.2983	0.69	0.1422	0.6403
1169	20563	SLIT2	11086	laminin-1 binding	GO:0043237	molecular function	45	2	0.3813	0.4658	0.3528	0.3549	0.02846	0.2959	0.4915	0.3847	0.5642	0.2652	0.4692
1170	20563	SLIT2	11086	extracellular space	GO:0005615	cellular component	45	17	0.3826	0.4731	0.3544	0.3543	0.02523	0.3074	0.4762	0.4007	0.5587	0.2765	0.4543
1171	20563	SLIT2	11086	protein binding	GO:0005515	molecular function	45	237	0.3897	0.4732	0.3629	0.3491	0.02153	0.321	0.4732	0.395	0.567	0.2921	0.4508
1172	20563	SLIT2	11086	extracellular exosome	GO:0070062	cellular component	45	24	0.402	0.476	0.376	0.3406	0.02109	0.334	0.484	0.4061	0.5579	0.3055	0.4627
1173	20563	SLIT2	11086	negative regulation of cellular response to growth factor stimulus	GO:0090288	biological process	45	13	0.4079	0.4791	0.3808	0.3343	0.03818	0.2972	0.5599	0.3745	0.613	0.2676	0.5419
1174	20563	SLIT2	11086	negative regulation of lamellipodium assembly	GO:0010593	biological process	45	4	0.4148	0.4936	0.3864	0.3311	0.036	0.3122	0.5512	0.4005	0.6083	0.2756	0.5415
1175	20563	SLIT2	11086	negative chemotaxis	GO:0050919	biological process	45	13	0.4397	0.4895	0.4145	0.3129	0.03637	0.3299	0.5862	0.3875	0.6182	0.2976	0.5772
1176	20563	SLIT2	11086	negative regulation of chemokine-mediated signaling pathway	GO:0070100	biological process	45	5	0.4418	0.4958	0.4183	0.3105	0.03572	0.3337	0.585	0.3995	0.6155	0.3064	0.5711
1177	20563	SLIT2	11086	negative regulation of small GTPase mediated signal transduction	GO:0051058	biological process	45	4	0.4571	0.5107	0.431	0.3014	0.04169	0.3274	0.6382	0.3968	0.6572	0.2909	0.6384
1178	20563	SLIT2	11086	negative regulation of retinal ganglion cell axon guidance	GO:0090260	biological process	45	3	0.4655	0.5061	0.4449	0.2967	0.02166	0.3905	0.5548	0.4176	0.6134	0.3691	0.5363
1179	20563	SLIT2	11086	cytoplasm	GO:0005737	cellular component	45	35	0.4814	0.5245	0.4618	0.2866	0.02095	0.4087	0.5671	0.4622	0.5952	0.3871	0.5508
1180	20563	SLIT2	11086	negative regulation of vascular permeability	GO:0043116	biological process	45	3	0.5265	0.5452	0.5082	0.2539	0.04376	0.3842	0.7215	0.4185	0.7103	0.3591	0.7193
1181	20563	SLIT2	11086	negative regulation of cell growth	GO:0030308	biological process	45	16	0.5281	0.537	0.5114	0.2572	0.02189	0.448	0.6225	0.4524	0.6374	0.4263	0.6135
1182	20348	SEMA3C	10725	semaphorin-plexin signaling pathway	GO:0071526	biological process	12	7	0.1014	0.1731	0.05178	0.6973	0.01858	0.08494	0.121	0.09561	0.3135	0.03777	0.07098
1183	20348	SEMA3C	10725	axon guidance	GO:0007411	biological process	12	24	0.1206	0.1731	0.07242	0.6484	0.01571	0.105	0.1384	0.09561	0.3135	0.05657	0.09272
1184	20348	SEMA3C	10725	integral component of plasma membrane	GO:0005887	cellular component	12	31	0.1418	0.1731	0.08239	0.6237	0.06054	0.08977	0.224	0.09561	0.3135	0.03137	0.2164
1185	20348	SEMA3C	10725	negative regulation of axon extension involved in axon guidance	GO:0048843	biological process	12	5	0.1433	0.1731	0.09409	0.607	0.03009	0.1065	0.1928	0.09561	0.3135	0.06008	0.1474
1186	20348	SEMA3C	10725	chemorepellent activity	GO:0045499	molecular function	12	3	0.17	0.1731	0.1222	0.563	0.03922	0.1155	0.2501	0.09561	0.3135	0.07107	0.21
1187	20348	SEMA3C	10725	semaphorin receptor binding	GO:0030215	molecular function	12	3	0.1731	0.1731	0.1231	0.5627	0.03582	0.1256	0.2384	0.09561	0.3135	0.07246	0.2092
1188	20348	SEMA3C	10725	neural crest cell migration	GO:0001755	biological process	12	7	0.1798	0.1778	0.1261	0.5542	0.05707	0.1078	0.2999	0.09786	0.3229	0.05414	0.2936
1189	20348	SEMA3C	10725	negative chemotaxis	GO:0050919	biological process	12	13	0.182	0.1731	0.134	0.5479	0.03559	0.1305	0.2537	0.09561	0.3135	0.0809	0.2219
1190	20348	SEMA3C	10725	extracellular space	GO:0005615	cellular component	12	17	0.2152	0.1866	0.1662	0.5028	0.06508	0.1174	0.3944	0.09049	0.3848	0.07378	0.3742
1191	20348	SEMA3C	10725	extracellular exosome	GO:0070062	cellular component	12	24	0.2183	0.1866	0.17	0.5009	0.05738	0.1277	0.3733	0.09049	0.3848	0.08211	0.3521
1192	20348	SEMA3C	10725	positive regulation of cell migration	GO:0030335	biological process	12	28	0.2246	0.2149	0.1804	0.4957	0.03167	0.1629	0.3095	0.1472	0.3138	0.1202	0.2705
1193	58193	EXTL2	3516	endoplasmic reticulum	GO:0005783	cellular component	9	18	0.2619	0.5215	0.2206	0.4574	0.02897	0.203	0.3378	0.4261	0.6382	0.1557	0.3126
1194	58193	EXTL2	3516	N-acetylglucosamine metabolic process	GO:0006044	biological process	9	4	0.2777	0.5215	0.2378	0.443	0.02219	0.2283	0.338	0.4261	0.6382	0.1821	0.3104
1195	58193	EXTL2	3516	nucleoplasm	GO:0005654	cellular component	9	26	0.3284	0.5215	0.294	0.3981	0.02002	0.2777	0.3882	0.4261	0.6382	0.2366	0.3652
1196	58193	EXTL2	3516	cytosol	GO:0005829	cellular component	9	32	0.3518	0.5215	0.3196	0.3796	0.0157	0.3111	0.3977	0.4261	0.6382	0.2714	0.3764
1197	58193	EXTL2	3516	UDP-N-acetylgalactosamine metabolic process	GO:0019276	biological process	9	6	0.3778	0.5215	0.3435	0.3569	0.04808	0.2522	0.5658	0.4261	0.6382	0.2075	0.5685
1198	58193	EXTL2	3516	protein binding	GO:0005515	molecular function	9	237	0.4127	0.5215	0.3881	0.3337	0.004924	0.4	0.4257	0.4261	0.6382	0.3701	0.4069
1199	58193	EXTL2	3516	glucuronyl-galactosyl-proteoglycan 4-alpha-N-acetylglucosaminyltransferase activity	GO:0001888	molecular function	9	2	0.5005	0.5489	0.4803	0.2745	0.02698	0.4074	0.6149	0.4336	0.695	0.3794	0.6081
1200	58193	EXTL2	3516	alpha-1,4-N-acetylgalactosaminyltransferase activity	GO:0035248	molecular function	9	2	0.6076	0.5925	0.5925	0.2087	0.03256	0.4867	0.7585	0.4639	0.7567	0.4639	0.7567
1201	140919	SLC17A6	16703	neurotransmitter transmembrane transporter activity	GO:0005326	molecular function	10	4	0.08599	0.0106	0.001247	0.9613	0.01187	0.08287	0.08923	0.001062	0.1059	0.0001065	0.01459
1202	140919	SLC17A6	16703	transmembrane transporter activity	GO:0022857	molecular function	10	21	0.08599	0.03434	0.0113	0.8914	0.02483	0.08287	0.08923	0.03149	0.03744	0.006101	0.02093
1203	140919	SLC17A6	16703	neurotransmitter loading into synaptic vesicle	GO:0098700	biological process	10	4	0.08599	0.03526	0.01569	0.8681	0.009055	0.08287	0.08923	0.03269	0.03803	0.01303	0.01889
1204	140919	SLC17A6	16703	L-glutamate transmembrane transporter activity	GO:0005313	molecular function	10	7	0.08599	0.03526	0.02032	0.8328	0.00867	0.08287	0.08923	0.03269	0.03803	0.01771	0.02331
1205	140919	SLC17A6	16703	anion transport	GO:0006820	biological process	10	5	0.08599	0.0357	0.0172	0.8459	0.02979	0.08287	0.08923	0.03288	0.03877	0.009187	0.03221
1206	140919	SLC17A6	16703	integral component of membrane	GO:0016021	cellular component	10	18	0.08659	0.03597	0.02785	0.7857	0.01302	0.08243	0.09096	0.0329	0.03934	0.02242	0.03461
1207	140919	SLC17A6	16703	synaptic transmission, glutamatergic	GO:0035249	biological process	10	2	0.08667	0.0346	0.01309	0.8653	0.04807	0.08451	0.08889	0.02987	0.04008	0.004679	0.03659
1208	140919	SLC17A6	16703	excitatory synapse	GO:0060076	cellular component	10	5	0.08676	0.03661	0.02996	0.7759	0.02046	0.08471	0.08887	0.03344	0.04008	0.02147	0.04181
1209	140919	SLC17A6	16703	integral component of synaptic vesicle membrane	GO:0030285	cellular component	10	3	0.0877	0.03597	0.0308	0.7711	0.01237	0.08152	0.09434	0.0329	0.03934	0.02501	0.03792
1210	140919	SLC17A6	16703	regulation of synapse structure or activity	GO:0050803	biological process	10	2	0.0898	0.03678	0.03461	0.7544	0.01377	0.08504	0.09482	0.03276	0.04129	0.02744	0.04366
1211	75209	SV2C	30670	integral component of membrane	GO:0016021	cellular component	4	18	0.08599	0.06011	0.02404	0.807	0.005711	0.08287	0.08923	0.05046	0.07161	0.02192	0.02636
1212	75209	SV2C	30670	neuron projection	GO:0043005	cellular component	4	27	0.08788	0.06011	0.03148	0.7679	0.01436	0.08551	0.09031	0.05046	0.07161	0.02475	0.04004
1213	75209	SV2C	30670	synaptic vesicle membrane	GO:0030672	cellular component	4	3	0.1042	0.06636	0.05478	0.6894	0.01936	0.08503	0.1276	0.05742	0.0767	0.03981	0.07539
1214	75209	SV2C	30670	protein binding	GO:0005515	molecular function	4	237	0.1267	0.08269	0.07852	0.6363	0.01364	0.1163	0.1379	0.07269	0.09406	0.06337	0.09729
1215	114604	PRDM15	13999	DNA-binding transcription activator activity, RNA polymerase II-specific	GO:0001228	molecular function	7	6	0.08599	0.0371	0.01152	0.8991	0.009939	0.08287	0.08923	0.02333	0.059	0.008821	0.01503
1216	114604	PRDM15	13999	RNA polymerase II cis-regulatory region sequence-specific DNA binding	GO:0000978	molecular function	7	22	0.08599	0.0371	0.02118	0.8266	0.01728	0.08287	0.08923	0.02333	0.059	0.01609	0.02787
1217	114604	PRDM15	13999	nuclear body	GO:0016604	cellular component	7	15	0.08599	0.0371	0.02218	0.8179	0.02533	0.08287	0.08923	0.02333	0.059	0.01452	0.0339
1218	114604	PRDM15	13999	regulation of transcription by RNA polymerase II	GO:0006357	biological process	7	42	0.08853	0.03793	0.02774	0.787	0.03787	0.08302	0.09441	0.0229	0.06283	0.01474	0.0522
1219	114604	PRDM15	13999	nucleus	GO:0005634	cellular component	7	48	0.09114	0.04026	0.03565	0.7504	0.02614	0.08147	0.102	0.02633	0.06156	0.0229	0.05549
1220	114604	PRDM15	13999	nucleoplasm	GO:0005654	cellular component	7	26	0.09349	0.0404	0.0404	0.7327	0.02484	0.08161	0.1071	0.02653	0.06152	0.02653	0.06152
1221	242259	SLC44A5	28524	transmembrane transport	GO:0055085	biological process	4	13	0.0915	0.09888	0.03709	0.7449	0.01792	0.08047	0.104	0.07524	0.13	0.02721	0.05056
1222	242259	SLC44A5	28524	membrane	GO:0016020	cellular component	4	35	0.1187	0.09888	0.0707	0.6517	0.01968	0.09658	0.1458	0.07524	0.13	0.05163	0.09682
1223	242259	SLC44A5	28524	transmembrane transporter activity	GO:0022857	molecular function	4	21	0.1194	0.09888	0.07172	0.6498	0.01361	0.1027	0.1387	0.07524	0.13	0.05764	0.08922
1224	242259	SLC44A5	28524	protein binding	GO:0005515	molecular function	4	237	0.2081	0.1638	0.1638	0.5144	0.02435	0.1618	0.2677	0.1195	0.2246	0.1195	0.2246
1225	243780	DENND11	29472	cytoplasm	GO:0005737	cellular component	1	35	0.2726	0.2347	0.2347	0.4463	0.01362	0.2376	0.3127	0.2	0.2753	0.2	0.2753
1226	16517	KCNJ16	6262	inward rectifier potassium channel activity	GO:0005242	molecular function	4	5	0.09286	0.076	0.04117	0.7299	0.0201	0.08364	0.1031	0.06657	0.08676	0.02929	0.05787
1227	16517	KCNJ16	6262	potassium ion import across plasma membrane	GO:1990573	biological process	4	3	0.09712	0.076	0.04514	0.717	0.02154	0.09024	0.1045	0.06657	0.08676	0.03134	0.065
1228	16517	KCNJ16	6262	plasma membrane	GO:0005886	cellular component	4	52	0.1069	0.08306	0.05663	0.684	0.02777	0.08319	0.1373	0.07742	0.08911	0.03564	0.08997
1229	16517	KCNJ16	6262	regulation of ion transmembrane transport	GO:0034765	biological process	4	9	0.1519	0.1053	0.1053	0.5903	0.01643	0.1316	0.1755	0.08248	0.1344	0.08248	0.1344
1230	17202	MC4R	6932	ubiquitin protein ligase binding	GO:0031625	molecular function	11	6	0.1577	0.3535	0.1092	0.5818	0.03701	0.1094	0.2274	0.2709	0.4611	0.06436	0.1851
1231	17202	MC4R	6932	melanocyte-stimulating hormone receptor activity	GO:0004980	molecular function	11	2	0.1872	0.3535	0.1425	0.5406	0.007333	0.1707	0.2052	0.2709	0.4611	0.1287	0.1578
1232	17202	MC4R	6932	neuropeptide binding	GO:0042923	molecular function	11	5	0.2059	0.3535	0.1608	0.5165	0.03378	0.1466	0.2891	0.2709	0.4611	0.1036	0.2494
1233	17202	MC4R	6932	plasma membrane	GO:0005886	cellular component	11	52	0.2648	0.3535	0.2242	0.4551	0.01973	0.2185	0.3209	0.2709	0.4611	0.1778	0.2828
1234	17202	MC4R	6932	regulation of metabolic process	GO:0019222	biological process	11	21	0.2865	0.3535	0.2492	0.4336	0.01804	0.2394	0.3428	0.2709	0.4611	0.2025	0.3067
1235	17202	MC4R	6932	G protein-coupled receptor activity	GO:0004930	molecular function	11	50	0.2985	0.3535	0.2617	0.4233	0.01905	0.2491	0.3576	0.2709	0.4611	0.2117	0.3233
1236	17202	MC4R	6932	protein binding	GO:0005515	molecular function	11	237	0.3165	0.3535	0.2823	0.4069	0.0195	0.2632	0.3806	0.2709	0.4611	0.2279	0.3498
1237	17202	MC4R	6932	cytoplasm	GO:0005737	cellular component	11	35	0.3362	0.3535	0.3039	0.3903	0.0223	0.2718	0.4159	0.2709	0.4611	0.2382	0.3876
1238	17202	MC4R	6932	adenylate cyclase-activating G protein-coupled receptor signaling pathway	GO:0007189	biological process	11	9	0.3701	0.3773	0.3378	0.3623	0.04212	0.2568	0.5333	0.2646	0.5381	0.2228	0.5122
1239	17202	MC4R	6932	positive regulation of bone resorption	GO:0045780	biological process	11	3	0.4267	0.4179	0.4034	0.3237	0.01023	0.3889	0.4681	0.368	0.4745	0.366	0.4447
1240	225642	GRP	4605	neuropeptide signaling pathway	GO:0007218	biological process	6	6	0.08599	0.04433	0.01108	0.9028	0.007316	0.08287	0.08923	0.03533	0.05563	0.008833	0.01391
1241	225642	GRP	4605	extracellular space	GO:0005615	cellular component	6	17	0.08902	0.04779	0.02948	0.7783	0.03037	0.08595	0.09219	0.03622	0.06306	0.01785	0.04871
1242	225642	GRP	4605	neuropeptide hormone activity	GO:0005184	molecular function	6	7	0.09013	0.04793	0.03744	0.7435	0.008284	0.08139	0.09981	0.03652	0.0629	0.0325	0.04312
1243	225642	GRP	4605	protein binding	GO:0005515	molecular function	6	237	0.1011	0.05061	0.05061	0.7005	0.02079	0.08587	0.119	0.03565	0.07185	0.03565	0.07185
1244	320116	FNDC9	33547	protein binding	GO:0005515	molecular function	1	237	0.2362	0.195	0.195	0.4831	0.01232	0.2058	0.2712	0.167	0.2275	0.167	0.2275
1245	109900	ASL	746	identical protein binding	GO:0042802	molecular function	6	14	0.09434	0.1719	0.04295	0.724	0.01592	0.08195	0.1086	0.1135	0.2605	0.0328	0.05624
1246	109900	ASL	746	arginine biosynthetic process via ornithine	GO:0042450	biological process	6	3	0.1094	0.1865	0.0558	0.6847	0.0397	0.07812	0.1533	0.106	0.3283	0.02928	0.1063
1247	109900	ASL	746	argininosuccinate lyase activity	GO:0004056	molecular function	6	2	0.2003	0.259	0.1565	0.5237	0.01448	0.1758	0.2282	0.2038	0.3292	0.1285	0.1904
1248	109900	ASL	746	extracellular exosome	GO:0070062	cellular component	6	24	0.2386	0.259	0.1951	0.4805	0.03555	0.17	0.3351	0.2038	0.3292	0.1272	0.2993
1249	109900	ASL	746	protein binding	GO:0005515	molecular function	6	237	0.2726	0.259	0.2331	0.4474	0.01815	0.2283	0.3256	0.2038	0.3292	0.1886	0.2882
1250	109900	ASL	746	cytosol	GO:0005829	cellular component	6	32	0.2977	0.2604	0.2604	0.424	0.02124	0.2458	0.3606	0.2053	0.3303	0.2053	0.3303
1251	73173	PCDH18	14268	integral component of plasma membrane	GO:0005887	cellular component	3	31	0.1284	0.2415	0.08049	0.6324	0.01583	0.1162	0.142	0.1879	0.3103	0.06264	0.1034
1252	73173	PCDH18	14268	cell adhesion	GO:0007155	biological process	3	13	0.3765	0.406	0.3456	0.3585	0.03478	0.2816	0.5035	0.3453	0.4774	0.2413	0.495
1253	73173	PCDH18	14268	protein binding	GO:0005515	molecular function	3	237	0.4447	0.4224	0.4224	0.3116	0.0138	0.3961	0.4993	0.3726	0.4789	0.3726	0.4789
1254	243274	TMEM132D	29411	protein binding	GO:0005515	molecular function	2	237	0.4219	0.49	0.3971	0.3268	0.02012	0.3595	0.4953	0.4077	0.5889	0.3275	0.4814
1255	243274	TMEM132D	29411	negative regulation of phosphatase activity	GO:0010923	biological process	2	10	0.4962	0.49	0.4769	0.2766	0.02704	0.3988	0.6173	0.4077	0.5889	0.3772	0.6029
1256	58243	NAP1L5	19968	histone binding	GO:0042393	molecular function	6	9	0.08599	0.006693	0.001339	0.9675	0.008583	0.08287	0.08923	0.00181	0.02476	0.0003619	0.004952
1257	58243	NAP1L5	19968	chromatin	GO:0000785	cellular component	6	10	0.08599	0.02866	0.01344	0.8718	0.02669	0.08287	0.08923	0.01655	0.04965	0.006606	0.02735
1258	58243	NAP1L5	19968	nucleus	GO:0005634	cellular component	6	48	0.08599	0.03839	0.02712	0.7904	0.01857	0.08287	0.08923	0.03	0.04912	0.02016	0.03647
1259	58243	NAP1L5	19968	protein binding	GO:0005515	molecular function	6	237	0.08928	0.04166	0.0359	0.7495	0.01351	0.08581	0.0929	0.0309	0.05616	0.02853	0.04518
1260	58243	NAP1L5	19968	chromatin binding	GO:0003682	molecular function	6	8	0.1124	0.06018	0.05272	0.6937	0.04934	0.08582	0.1471	0.03434	0.1055	0.02324	0.1196
1261	243312	ELFN1	33154	extracellular matrix	GO:0031012	cellular component	3	14	0.1284	0.2317	0.08213	0.6294	0.01585	0.108	0.1526	0.1633	0.3287	0.06397	0.1055
1262	243312	ELFN1	33154	extracellular space	GO:0005615	cellular component	3	17	0.2443	0.2665	0.2017	0.4753	0.0265	0.1878	0.3178	0.1569	0.4526	0.1461	0.2785
1263	243312	ELFN1	33154	negative regulation of phosphatase activity	GO:0010923	biological process	3	10	0.3791	0.3435	0.3435	0.3472	0.07466	0.1987	0.7232	0.1596	0.7396	0.1596	0.7396
1264	74477	KIAA0753	29110	centrosome	GO:0005813	cellular component	7	9	0.08599	0.02807	0.01827	0.849	0.005394	0.08287	0.08923	0.02171	0.03631	0.0167	0.01998
1265	74477	KIAA0753	29110	cytosol	GO:0005829	cellular component	7	32	0.08599	0.02807	0.02231	0.8184	0.0116	0.08287	0.08923	0.02171	0.03631	0.01853	0.02686
1266	74477	KIAA0753	29110	protein binding	GO:0005515	molecular function	7	237	0.08599	0.02807	0.02422	0.8057	0.002002	0.08287	0.08923	0.02171	0.03631	0.02346	0.02501
1267	74477	KIAA0753	29110	centriolar satellite	GO:0034451	cellular component	7	3	0.08615	0.02807	0.02138	0.8252	0.02082	0.08276	0.08968	0.02171	0.03631	0.01529	0.02988
1268	74477	KIAA0753	29110	protein localization to centrosome	GO:0071539	biological process	7	3	0.09541	0.03444	0.03216	0.766	0.04382	0.07529	0.1209	0.01784	0.06648	0.01551	0.06668
1269	20911	STXBP2	11445	intracellular protein transport	GO:0006886	biological process	18	20	0.08599	0.0187	0.001358	0.9701	0.004401	0.08287	0.08923	0.01541	0.0227	0.0006848	0.002693
1270	20911	STXBP2	11445	syntaxin-3 binding	GO:0030348	molecular function	18	2	0.08599	0.02356	0.005068	0.942	0.002248	0.08287	0.08923	0.02106	0.02637	0.004295	0.00598
1271	20911	STXBP2	11445	syntaxin-1 binding	GO:0017075	molecular function	18	2	0.08599	0.02356	0.005378	0.9401	0.0008889	0.08287	0.08923	0.02106	0.02637	0.005008	0.005775
1272	20911	STXBP2	11445	specific granule	GO:0042581	cellular component	18	2	0.08599	0.02356	0.007451	0.9269	0.004661	0.08287	0.08923	0.02106	0.02637	0.00578	0.009607
1273	20911	STXBP2	11445	tertiary granule	GO:0070820	cellular component	18	2	0.08599	0.02356	0.007702	0.9255	0.00448	0.08287	0.08923	0.02106	0.02637	0.006074	0.009766
1274	20911	STXBP2	11445	secretory granule	GO:0030141	cellular component	18	18	0.08599	0.02411	0.008987	0.917	0.00616	0.08287	0.08923	0.02191	0.02654	0.006821	0.01184
1275	20911	STXBP2	11445	azurophil granule	GO:0042582	cellular component	18	3	0.08599	0.02437	0.01097	0.902	0.009871	0.08287	0.08923	0.02088	0.02843	0.007806	0.0154
1276	20911	STXBP2	11445	neutrophil degranulation	GO:0043312	biological process	18	3	0.08599	0.02454	0.008904	0.9033	0.02152	0.08287	0.08923	0.02074	0.02905	0.003385	0.02342
1277	20911	STXBP2	11445	syntaxin binding	GO:0019905	molecular function	18	7	0.08599	0.0251	0.01102	0.903	0.006944	0.08287	0.08923	0.02181	0.02888	0.008855	0.01372
1278	20911	STXBP2	11445	cytolytic granule	GO:0044194	cellular component	18	2	0.08599	0.02528	0.01333	0.8811	0.01827	0.08287	0.08923	0.02169	0.02946	0.008585	0.0207
1279	20911	STXBP2	11445	vesicle docking involved in exocytosis	GO:0006904	biological process	18	6	0.08599	0.02718	0.01904	0.8428	0.004145	0.08287	0.08923	0.02485	0.02972	0.01773	0.02044
1280	20911	STXBP2	11445	vesicle-mediated transport	GO:0016192	biological process	18	25	0.08599	0.02718	0.01925	0.8408	0.005886	0.08287	0.08923	0.02485	0.02972	0.01746	0.02122
1281	20911	STXBP2	11445	leukocyte mediated cytotoxicity	GO:0001909	biological process	18	8	0.08599	0.02718	0.01941	0.8397	0.01101	0.08287	0.08923	0.02485	0.02972	0.01621	0.02323
1282	20911	STXBP2	11445	plasma membrane	GO:0005886	cellular component	18	52	0.08659	0.03756	0.02989	0.7752	0.007567	0.08243	0.09096	0.03244	0.04349	0.02629	0.034
1283	20911	STXBP2	11445	neurotransmitter secretion	GO:0007269	biological process	18	24	0.08881	0.03488	0.02621	0.7936	0.0387	0.08058	0.09788	0.02192	0.0555	0.01355	0.05071
1284	20911	STXBP2	11445	extracellular exosome	GO:0070062	cellular component	18	24	0.1054	0.06181	0.05616	0.6854	0.01971	0.08621	0.1289	0.04291	0.08905	0.04039	0.07809
1285	20911	STXBP2	11445	cytosol	GO:0005829	cellular component	18	32	0.1104	0.0633	0.06145	0.6719	0.02497	0.08743	0.1393	0.04339	0.09232	0.0407	0.0928
1286	20911	STXBP2	11445	protein binding	GO:0005515	molecular function	18	237	0.111	0.06371	0.06251	0.6701	0.02052	0.09043	0.1363	0.04587	0.08851	0.04492	0.08698
1287	230088	FAM214B	25666	nucleus	GO:0005634	cellular component	2	48	0.1551	0.1589	0.1098	0.5841	0.00924	0.14	0.1717	0.1295	0.195	0.0955	0.1262
1288	230088	FAM214B	25666	protein binding	GO:0005515	molecular function	2	237	0.2032	0.1589	0.1589	0.5209	0.0155	0.1712	0.2411	0.1295	0.195	0.1295	0.195
1289	12778	ACKR3	23692	positive regulation of ERK1 and ERK2 cascade	GO:0070374	biological process	21	6	0.08683	0.1468	0.0331	0.7608	0.01138	0.08254	0.09134	0.1311	0.1644	0.02731	0.0401
1290	12778	ACKR3	23692	plasma membrane	GO:0005886	cellular component	21	52	0.09569	0.1468	0.03875	0.7383	0.03375	0.07508	0.122	0.1311	0.1644	0.02196	0.06837
1291	12778	ACKR3	23692	cell chemotaxis	GO:0060326	biological process	21	17	0.09593	0.1468	0.04581	0.715	0.009193	0.08626	0.1067	0.1311	0.1644	0.03912	0.05363
1292	12778	ACKR3	23692	cell surface	GO:0009986	cellular component	21	7	0.1096	0.1468	0.05943	0.677	0.02486	0.0891	0.1348	0.1311	0.1644	0.0393	0.08986
1293	12778	ACKR3	23692	intracellular membrane-bounded organelle	GO:0043231	cellular component	21	39	0.1133	0.1468	0.06299	0.668	0.03007	0.08795	0.1461	0.1311	0.1644	0.03827	0.1037
1294	12778	ACKR3	23692	protein binding	GO:0005515	molecular function	21	237	0.116	0.165	0.0665	0.6596	0.03533	0.08189	0.1644	0.1174	0.2321	0.03794	0.1165
1295	12778	ACKR3	23692	immune response	GO:0006955	biological process	21	14	0.123	0.1592	0.07388	0.6445	0.02761	0.09672	0.1564	0.1539	0.1646	0.04787	0.114
1296	12778	ACKR3	23692	C-X-C chemokine binding	GO:0019958	molecular function	21	3	0.1231	0.1735	0.06582	0.6566	0.06315	0.07034	0.2156	0.127	0.237	0.02489	0.174
1297	12778	ACKR3	23692	endosome	GO:0005768	cellular component	21	12	0.1324	0.1759	0.081	0.6264	0.055	0.07632	0.2297	0.1104	0.2801	0.0357	0.1838
1298	12778	ACKR3	23692	C-C chemokine binding	GO:0019957	molecular function	21	8	0.1492	0.1815	0.09292	0.6018	0.06731	0.07985	0.2788	0.1221	0.2696	0.03536	0.2442
1299	12778	ACKR3	23692	scavenger receptor activity	GO:0005044	molecular function	21	2	0.1673	0.2079	0.1152	0.5702	0.05433	0.09743	0.2872	0.1352	0.3196	0.05144	0.2578
1300	12778	ACKR3	23692	clathrin-coated pit	GO:0005905	cellular component	21	2	0.1711	0.2081	0.1256	0.5622	0.006403	0.1572	0.1862	0.1556	0.2783	0.1146	0.1377
1301	12778	ACKR3	23692	chemokine-mediated signaling pathway	GO:0070098	biological process	21	12	0.189	0.2148	0.1421	0.5359	0.04524	0.1188	0.3007	0.1332	0.3464	0.07695	0.2625
1302	12778	ACKR3	23692	external side of plasma membrane	GO:0009897	cellular component	21	5	0.1951	0.2179	0.1459	0.528	0.0607	0.1063	0.3579	0.1323	0.3589	0.06319	0.3368
1303	12778	ACKR3	23692	positive regulation of cytosolic calcium ion concentration	GO:0007204	biological process	21	10	0.204	0.2179	0.1565	0.516	0.05739	0.1144	0.3638	0.1323	0.3589	0.07205	0.3401
1304	12778	ACKR3	23692	receptor internalization	GO:0031623	biological process	21	11	0.2063	0.239	0.1228	0.542	0.1107	0.08908	0.4777	0.1608	0.3552	0.02401	0.628
1305	12778	ACKR3	23692	C-X-C chemokine receptor activity	GO:0016494	molecular function	21	4	0.2212	0.2448	0.179	0.4996	0.006888	0.2048	0.2388	0.2082	0.2878	0.164	0.1953
1306	12778	ACKR3	23692	C-C chemokine receptor activity	GO:0016493	molecular function	21	6	0.2474	0.2529	0.2062	0.4723	0.008472	0.2241	0.2731	0.218	0.2934	0.1857	0.229
1307	12778	ACKR3	23692	calcium-mediated signaling	GO:0019722	biological process	21	12	0.3105	0.2942	0.2745	0.4114	0.03158	0.2321	0.4155	0.2142	0.4041	0.1949	0.3866
1308	12778	ACKR3	23692	negative regulation of intrinsic apoptotic signaling pathway in response to DNA damage	GO:1902230	biological process	21	5	0.3172	0.3242	0.2766	0.4007	0.06624	0.1769	0.5688	0.2032	0.5173	0.135	0.5667
1309	15013	HLA-A	4931	beta-2-microglobulin binding	GO:0030881	molecular function	41	2	0.08599	0.08081	0.01029	0.9008	0.0184	0.08287	0.08923	0.05697	0.1146	0.005628	0.01881
1310	15013	HLA-A	4931	T cell mediated cytotoxicity directed against tumor cell target	GO:0002419	biological process	41	3	0.08599	0.08081	0.01186	0.8887	0.02339	0.08287	0.08923	0.05697	0.1146	0.006686	0.02102
1311	15013	HLA-A	4931	TAP binding	GO:0046977	molecular function	41	4	0.08599	0.08081	0.01292	0.8823	0.01871	0.08287	0.08923	0.05697	0.1146	0.007668	0.02178
1312	15013	HLA-A	4931	positive regulation of CD8-positive, alpha-beta T cell proliferation	GO:2000566	biological process	41	4	0.08599	0.08081	0.01977	0.8363	0.01503	0.08287	0.08923	0.05697	0.1146	0.01555	0.02514
1313	15013	HLA-A	4931	T cell mediated cytotoxicity	GO:0001913	biological process	41	4	0.08599	0.08081	0.01989	0.8362	0.007107	0.08287	0.08923	0.05697	0.1146	0.0177	0.02234
1314	15013	HLA-A	4931	defense response to Gram-positive bacterium	GO:0050830	biological process	41	3	0.08599	0.08081	0.0197	0.8318	0.02808	0.08287	0.08923	0.05697	0.1146	0.01177	0.03297
1315	15013	HLA-A	4931	protection from natural killer cell mediated cytotoxicity	GO:0042270	biological process	41	2	0.08639	0.08081	0.01795	0.8464	0.03254	0.08258	0.09037	0.05697	0.1146	0.01021	0.03156
1316	15013	HLA-A	4931	antibacterial humoral response	GO:0019731	biological process	41	6	0.08639	0.08081	0.02125	0.8261	0.02428	0.08258	0.09037	0.05697	0.1146	0.01432	0.03154
1317	15013	HLA-A	4931	signaling receptor binding	GO:0005102	molecular function	41	59	0.08651	0.08149	0.02159	0.8228	0.02994	0.08416	0.08894	0.05792	0.1147	0.01306	0.0357
1318	15013	HLA-A	4931	positive regulation of CD8-positive, alpha-beta T cell activation	GO:2001187	biological process	41	5	0.08668	0.08559	0.03084	0.771	0.01201	0.08236	0.09122	0.06277	0.1167	0.02522	0.03772
1319	15013	HLA-A	4931	Golgi medial cisterna	GO:0005797	cellular component	41	2	0.09418	0.08527	0.03184	0.7668	0.04839	0.08396	0.1056	0.06256	0.1162	0.01413	0.07176
1320	15013	HLA-A	4931	TAP complex binding	GO:0062061	molecular function	41	2	0.09541	0.09118	0.03948	0.7356	0.03172	0.07529	0.1209	0.05936	0.1401	0.02313	0.06738
1321	15013	HLA-A	4931	T cell receptor signaling pathway	GO:0050852	biological process	41	2	0.09598	0.09449	0.03949	0.7359	0.03052	0.0797	0.1156	0.06433	0.1388	0.02358	0.06612
1322	15013	HLA-A	4931	positive regulation of memory T cell activation	GO:2000568	biological process	41	3	0.09907	0.09611	0.0495	0.7041	0.01352	0.08485	0.1157	0.06667	0.1386	0.03943	0.06214
1323	15013	HLA-A	4931	peptide antigen binding	GO:0042605	molecular function	41	3	0.09987	0.09118	0.03776	0.7422	0.05787	0.07408	0.1346	0.05936	0.1401	0.01453	0.09816
1324	15013	HLA-A	4931	immune response	GO:0006955	biological process	41	14	0.1026	0.09088	0.04272	0.7252	0.05106	0.08708	0.1209	0.07182	0.115	0.01829	0.09975
1325	15013	HLA-A	4931	detection of bacterium	GO:0016045	biological process	41	4	0.1044	0.09118	0.03633	0.7468	0.069	0.06905	0.158	0.05936	0.1401	0.0118	0.1119
1326	15013	HLA-A	4931	CD8 receptor binding	GO:0042610	molecular function	41	2	0.1048	0.09118	0.03681	0.7404	0.07381	0.07151	0.1535	0.05936	0.1401	0.01032	0.1313
1327	15013	HLA-A	4931	positive regulation of T cell mediated cytotoxicity	GO:0001916	biological process	41	7	0.1053	0.09681	0.05652	0.6853	0.005927	0.09574	0.1159	0.06761	0.1386	0.05119	0.0624
1328	15013	HLA-A	4931	positive regulation of interferon-gamma production	GO:0032729	biological process	41	3	0.1056	0.09175	0.05223	0.6953	0.03533	0.08092	0.1379	0.05992	0.1405	0.0289	0.09437
1329	15013	HLA-A	4931	T cell receptor binding	GO:0042608	molecular function	41	3	0.1063	0.09118	0.0429	0.7242	0.06391	0.07459	0.1514	0.05936	0.1401	0.01507	0.1221
1330	15013	HLA-A	4931	RNA binding	GO:0003723	molecular function	41	43	0.1065	0.09118	0.04272	0.7227	0.06438	0.06777	0.1674	0.05936	0.1401	0.01506	0.1212
1331	15013	HLA-A	4931	plasma membrane	GO:0005886	cellular component	41	52	0.1082	0.09118	0.05462	0.6879	0.04602	0.07333	0.1598	0.05936	0.1401	0.02585	0.1154
1332	15013	HLA-A	4931	extracellular exosome	GO:0070062	cellular component	41	24	0.1094	0.0956	0.05976	0.6758	0.03274	0.07947	0.1506	0.06594	0.1386	0.03524	0.1013
1333	15013	HLA-A	4931	cell surface	GO:0009986	cellular component	41	7	0.1127	0.09681	0.06422	0.6664	0.01172	0.1003	0.1266	0.06761	0.1386	0.05297	0.07785
1334	15013	HLA-A	4931	antigen processing and presentation of endogenous peptide antigen via MHC class I via ER pathway, TAP-dependent	GO:0002485	biological process	41	2	0.1141	0.09853	0.06379	0.6657	0.03553	0.08272	0.1575	0.06995	0.1388	0.0356	0.1143
1335	15013	HLA-A	4931	antigen processing and presentation of endogenous peptide antigen via MHC class I via ER pathway, TAP-independent	GO:0002486	biological process	41	2	0.1149	0.09853	0.06456	0.664	0.03581	0.08311	0.1589	0.06995	0.1388	0.03585	0.1162
1336	15013	HLA-A	4931	endoplasmic reticulum exit site	GO:0070971	cellular component	41	2	0.115	0.09914	0.06739	0.6595	0.005243	0.1124	0.1177	0.07087	0.1387	0.06195	0.0733
1337	15013	HLA-A	4931	positive regulation of T cell cytokine production	GO:0002726	biological process	41	6	0.1185	0.09681	0.07224	0.6485	0.01843	0.09651	0.1455	0.06761	0.1386	0.05386	0.0969
1338	15013	HLA-A	4931	MHC class I protein complex	GO:0042612	cellular component	41	2	0.1191	0.09681	0.07274	0.6477	0.0124	0.1032	0.1374	0.06761	0.1386	0.05967	0.08868
1339	15013	HLA-A	4931	Golgi apparatus	GO:0005794	cellular component	41	12	0.1198	0.09375	0.06797	0.655	0.0469	0.07851	0.1829	0.06041	0.1455	0.03203	0.1442
1340	15013	HLA-A	4931	membrane	GO:0016020	cellular component	41	35	0.1203	0.1011	0.07269	0.6477	0.01527	0.1023	0.1416	0.07334	0.1393	0.05683	0.09297
1341	15013	HLA-A	4931	antigen processing and presentation of endogenous peptide antigen via MHC class I	GO:0019885	biological process	41	5	0.1365	0.1039	0.08909	0.6155	0.03106	0.0989	0.1885	0.07248	0.149	0.0553	0.1435
1342	15013	HLA-A	4931	CD8-positive, alpha-beta T cell activation	GO:0036037	biological process	41	4	0.1389	0.1054	0.09235	0.611	0.02234	0.1092	0.1765	0.07797	0.1425	0.06535	0.1305
1343	15013	HLA-A	4931	antigen processing and presentation of exogenous peptide antigen via MHC class I	GO:0042590	biological process	41	5	0.1418	0.1055	0.09559	0.6043	0.0296	0.1027	0.1958	0.07147	0.1558	0.06135	0.1489
1344	15013	HLA-A	4931	endoplasmic reticulum	GO:0005783	cellular component	41	18	0.1535	0.1149	0.1067	0.586	0.03512	0.1058	0.2227	0.07293	0.181	0.06432	0.177
1345	15013	HLA-A	4931	protein binding	GO:0005515	molecular function	41	237	0.1576	0.1254	0.1063	0.5814	0.0632	0.08481	0.2928	0.06422	0.2447	0.04299	0.2627
1346	15013	HLA-A	4931	MHC class I peptide loading complex	GO:0042824	cellular component	41	3	0.1945	0.1577	0.1497	0.5309	0.0212	0.1584	0.2388	0.1272	0.1954	0.1127	0.1989
1347	14972	HLA-A	4931	beta-2-microglobulin binding	GO:0030881	molecular function	41	2	0.08599	0.08081	0.01029	0.9008	0.0184	0.08287	0.08923	0.05697	0.1146	0.005628	0.01881
1348	14972	HLA-A	4931	T cell mediated cytotoxicity directed against tumor cell target	GO:0002419	biological process	41	3	0.08599	0.08081	0.01186	0.8887	0.02339	0.08287	0.08923	0.05697	0.1146	0.006686	0.02102
1349	14972	HLA-A	4931	TAP binding	GO:0046977	molecular function	41	4	0.08599	0.08081	0.01292	0.8823	0.01871	0.08287	0.08923	0.05697	0.1146	0.007668	0.02178
1350	14972	HLA-A	4931	positive regulation of CD8-positive, alpha-beta T cell proliferation	GO:2000566	biological process	41	4	0.08599	0.08081	0.01977	0.8363	0.01503	0.08287	0.08923	0.05697	0.1146	0.01555	0.02514
1351	14972	HLA-A	4931	T cell mediated cytotoxicity	GO:0001913	biological process	41	4	0.08599	0.08081	0.01989	0.8362	0.007107	0.08287	0.08923	0.05697	0.1146	0.0177	0.02234
1352	14972	HLA-A	4931	defense response to Gram-positive bacterium	GO:0050830	biological process	41	3	0.08599	0.08081	0.0197	0.8318	0.02808	0.08287	0.08923	0.05697	0.1146	0.01177	0.03297
1353	14972	HLA-A	4931	protection from natural killer cell mediated cytotoxicity	GO:0042270	biological process	41	2	0.08639	0.08081	0.01795	0.8464	0.03254	0.08258	0.09037	0.05697	0.1146	0.01021	0.03156
1354	14972	HLA-A	4931	antibacterial humoral response	GO:0019731	biological process	41	6	0.08639	0.08081	0.02125	0.8261	0.02428	0.08258	0.09037	0.05697	0.1146	0.01432	0.03154
1355	14972	HLA-A	4931	signaling receptor binding	GO:0005102	molecular function	41	59	0.08651	0.08149	0.02159	0.8228	0.02994	0.08416	0.08894	0.05792	0.1147	0.01306	0.0357
1356	14972	HLA-A	4931	positive regulation of CD8-positive, alpha-beta T cell activation	GO:2001187	biological process	41	5	0.08668	0.08559	0.03084	0.771	0.01201	0.08236	0.09122	0.06277	0.1167	0.02522	0.03772
1357	14972	HLA-A	4931	Golgi medial cisterna	GO:0005797	cellular component	41	2	0.09418	0.08527	0.03184	0.7668	0.04839	0.08396	0.1056	0.06256	0.1162	0.01413	0.07176
1358	14972	HLA-A	4931	TAP complex binding	GO:0062061	molecular function	41	2	0.09541	0.09118	0.03948	0.7356	0.03172	0.07529	0.1209	0.05936	0.1401	0.02313	0.06738
1359	14972	HLA-A	4931	T cell receptor signaling pathway	GO:0050852	biological process	41	2	0.09598	0.09449	0.03949	0.7359	0.03052	0.0797	0.1156	0.06433	0.1388	0.02358	0.06612
1360	14972	HLA-A	4931	positive regulation of memory T cell activation	GO:2000568	biological process	41	3	0.09907	0.09611	0.0495	0.7041	0.01352	0.08485	0.1157	0.06667	0.1386	0.03943	0.06214
1361	14972	HLA-A	4931	peptide antigen binding	GO:0042605	molecular function	41	3	0.09987	0.09118	0.03776	0.7422	0.05787	0.07408	0.1346	0.05936	0.1401	0.01453	0.09816
1362	14972	HLA-A	4931	immune response	GO:0006955	biological process	41	14	0.1026	0.09088	0.04272	0.7252	0.05106	0.08708	0.1209	0.07182	0.115	0.01829	0.09975
1363	14972	HLA-A	4931	detection of bacterium	GO:0016045	biological process	41	4	0.1044	0.09118	0.03633	0.7468	0.069	0.06905	0.158	0.05936	0.1401	0.0118	0.1119
1364	14972	HLA-A	4931	CD8 receptor binding	GO:0042610	molecular function	41	2	0.1048	0.09118	0.03681	0.7404	0.07381	0.07151	0.1535	0.05936	0.1401	0.01032	0.1313
1365	14972	HLA-A	4931	positive regulation of T cell mediated cytotoxicity	GO:0001916	biological process	41	7	0.1053	0.09681	0.05652	0.6853	0.005927	0.09574	0.1159	0.06761	0.1386	0.05119	0.0624
1366	14972	HLA-A	4931	positive regulation of interferon-gamma production	GO:0032729	biological process	41	3	0.1056	0.09175	0.05223	0.6953	0.03533	0.08092	0.1379	0.05992	0.1405	0.0289	0.09437
1367	14972	HLA-A	4931	T cell receptor binding	GO:0042608	molecular function	41	3	0.1063	0.09118	0.0429	0.7242	0.06391	0.07459	0.1514	0.05936	0.1401	0.01507	0.1221
1368	14972	HLA-A	4931	RNA binding	GO:0003723	molecular function	41	43	0.1065	0.09118	0.04272	0.7227	0.06438	0.06777	0.1674	0.05936	0.1401	0.01506	0.1212
1369	14972	HLA-A	4931	plasma membrane	GO:0005886	cellular component	41	52	0.1082	0.09118	0.05462	0.6879	0.04602	0.07333	0.1598	0.05936	0.1401	0.02585	0.1154
1370	14972	HLA-A	4931	extracellular exosome	GO:0070062	cellular component	41	24	0.1094	0.0956	0.05976	0.6758	0.03274	0.07947	0.1506	0.06594	0.1386	0.03524	0.1013
1371	14972	HLA-A	4931	cell surface	GO:0009986	cellular component	41	7	0.1127	0.09681	0.06422	0.6664	0.01172	0.1003	0.1266	0.06761	0.1386	0.05297	0.07785
1372	14972	HLA-A	4931	antigen processing and presentation of endogenous peptide antigen via MHC class I via ER pathway, TAP-dependent	GO:0002485	biological process	41	2	0.1141	0.09853	0.06379	0.6657	0.03553	0.08272	0.1575	0.06995	0.1388	0.0356	0.1143
1373	14972	HLA-A	4931	antigen processing and presentation of endogenous peptide antigen via MHC class I via ER pathway, TAP-independent	GO:0002486	biological process	41	2	0.1149	0.09853	0.06456	0.664	0.03581	0.08311	0.1589	0.06995	0.1388	0.03585	0.1162
1374	14972	HLA-A	4931	endoplasmic reticulum exit site	GO:0070971	cellular component	41	2	0.115	0.09914	0.06739	0.6595	0.005243	0.1124	0.1177	0.07087	0.1387	0.06195	0.0733
1375	14972	HLA-A	4931	positive regulation of T cell cytokine production	GO:0002726	biological process	41	6	0.1185	0.09681	0.07224	0.6485	0.01843	0.09651	0.1455	0.06761	0.1386	0.05386	0.0969
1376	14972	HLA-A	4931	MHC class I protein complex	GO:0042612	cellular component	41	2	0.1191	0.09681	0.07274	0.6477	0.0124	0.1032	0.1374	0.06761	0.1386	0.05967	0.08868
1377	14972	HLA-A	4931	Golgi apparatus	GO:0005794	cellular component	41	12	0.1198	0.09375	0.06797	0.655	0.0469	0.07851	0.1829	0.06041	0.1455	0.03203	0.1442
1378	14972	HLA-A	4931	membrane	GO:0016020	cellular component	41	35	0.1203	0.1011	0.07269	0.6477	0.01527	0.1023	0.1416	0.07334	0.1393	0.05683	0.09297
1379	14972	HLA-A	4931	antigen processing and presentation of endogenous peptide antigen via MHC class I	GO:0019885	biological process	41	5	0.1365	0.1039	0.08909	0.6155	0.03106	0.0989	0.1885	0.07248	0.149	0.0553	0.1435
1380	14972	HLA-A	4931	CD8-positive, alpha-beta T cell activation	GO:0036037	biological process	41	4	0.1389	0.1054	0.09235	0.611	0.02234	0.1092	0.1765	0.07797	0.1425	0.06535	0.1305
1381	14972	HLA-A	4931	antigen processing and presentation of exogenous peptide antigen via MHC class I	GO:0042590	biological process	41	5	0.1418	0.1055	0.09559	0.6043	0.0296	0.1027	0.1958	0.07147	0.1558	0.06135	0.1489
1382	14972	HLA-A	4931	endoplasmic reticulum	GO:0005783	cellular component	41	18	0.1535	0.1149	0.1067	0.586	0.03512	0.1058	0.2227	0.07293	0.181	0.06432	0.177
1383	14972	HLA-A	4931	protein binding	GO:0005515	molecular function	41	237	0.1576	0.1254	0.1063	0.5814	0.0632	0.08481	0.2928	0.06422	0.2447	0.04299	0.2627
1384	14972	HLA-A	4931	MHC class I peptide loading complex	GO:0042824	cellular component	41	3	0.1945	0.1577	0.1497	0.5309	0.0212	0.1584	0.2388	0.1272	0.1954	0.1127	0.1989
1385	20271	SCN5A	10593	scaffold protein binding	GO:0097110	molecular function	62	2	0.08599	0.0234	0.002505	0.9314	0.03351	0.08287	0.08923	0.01173	0.04666	0.0002526	0.02484
1386	20271	SCN5A	10593	calmodulin binding	GO:0005516	molecular function	62	3	0.08599	0.0234	0.004347	0.9135	0.03084	0.08287	0.08923	0.01173	0.04666	0.000436	0.04334
1387	20271	SCN5A	10593	membrane depolarization during cardiac muscle cell action potential	GO:0086012	biological process	62	8	0.08599	0.02608	0.002721	0.9551	0.01091	0.08287	0.08923	0.01578	0.04311	0.0009628	0.007689
1388	20271	SCN5A	10593	voltage-gated sodium channel activity involved in cardiac muscle cell action potential	GO:0086006	molecular function	62	6	0.08599	0.02608	0.002537	0.9547	0.01225	0.08287	0.08923	0.01578	0.04311	0.0007385	0.008716
1389	20271	SCN5A	10593	sarcolemma	GO:0042383	cellular component	62	3	0.08599	0.02696	0.004613	0.9274	0.02568	0.08287	0.08923	0.0172	0.04227	0.001033	0.02061
1390	20271	SCN5A	10593	membrane depolarization	GO:0051899	biological process	62	5	0.08599	0.02696	0.00768	0.9245	0.006992	0.08287	0.08923	0.0172	0.04227	0.005368	0.01099
1391	20271	SCN5A	10593	nitric-oxide synthase binding	GO:0050998	molecular function	62	2	0.08599	0.02696	0.006413	0.9244	0.01848	0.08287	0.08923	0.0172	0.04227	0.002631	0.01563
1392	20271	SCN5A	10593	atrial cardiac muscle cell action potential	GO:0086014	biological process	62	2	0.08599	0.02696	0.0078	0.9203	0.01341	0.08287	0.08923	0.0172	0.04227	0.004544	0.01339
1393	20271	SCN5A	10593	ventricular cardiac muscle cell action potential	GO:0086005	biological process	62	2	0.08599	0.02696	0.007596	0.9201	0.01538	0.08287	0.08923	0.0172	0.04227	0.004131	0.01397
1394	20271	SCN5A	10593	cardiac muscle cell action potential involved in contraction	GO:0086002	biological process	62	4	0.08599	0.02696	0.007684	0.9187	0.01532	0.08287	0.08923	0.0172	0.04227	0.003687	0.01602
1395	20271	SCN5A	10593	membrane depolarization during SA node cell action potential	GO:0086046	biological process	62	2	0.08599	0.02696	0.009119	0.9073	0.02005	0.08287	0.08923	0.0172	0.04227	0.004728	0.01759
1396	20271	SCN5A	10593	membrane depolarization during atrial cardiac muscle cell action potential	GO:0098912	biological process	62	2	0.08599	0.02696	0.009163	0.9065	0.02153	0.08287	0.08923	0.0172	0.04227	0.004807	0.01747
1397	20271	SCN5A	10593	membrane depolarization during AV node cell action potential	GO:0086045	biological process	62	2	0.08599	0.02696	0.009263	0.9053	0.02164	0.08287	0.08923	0.0172	0.04227	0.004728	0.01815
1398	20271	SCN5A	10593	membrane depolarization during Purkinje myocyte cell action potential	GO:0086047	biological process	62	2	0.08599	0.02696	0.009576	0.9026	0.02307	0.08287	0.08923	0.0172	0.04227	0.004911	0.01867
1399	20271	SCN5A	10593	membrane depolarization during bundle of His cell action potential	GO:0086048	biological process	62	2	0.08599	0.02696	0.009437	0.9012	0.02564	0.08287	0.08923	0.0172	0.04227	0.004455	0.01999
1400	20271	SCN5A	10593	voltage-gated sodium channel activity involved in Purkinje myocyte action potential	GO:0086062	molecular function	62	2	0.08599	0.02696	0.01151	0.8922	0.02149	0.08287	0.08923	0.0172	0.04227	0.006737	0.01966
1401	20271	SCN5A	10593	voltage-gated sodium channel activity involved in AV node cell action potential	GO:0086060	molecular function	62	2	0.08599	0.02696	0.01158	0.8919	0.02133	0.08287	0.08923	0.0172	0.04227	0.006843	0.0196
1402	20271	SCN5A	10593	voltage-gated sodium channel activity involved in bundle of His cell action potential	GO:0086061	molecular function	62	2	0.08599	0.02696	0.01143	0.8918	0.02338	0.08287	0.08923	0.0172	0.04227	0.00644	0.02029
1403	20271	SCN5A	10593	voltage-gated sodium channel activity involved in SA node cell action potential	GO:0086063	molecular function	62	2	0.08599	0.02696	0.01158	0.8913	0.022	0.08287	0.08923	0.0172	0.04227	0.006634	0.02023
1404	20271	SCN5A	10593	membrane depolarization during action potential	GO:0086010	biological process	62	4	0.08599	0.02699	0.009025	0.9137	0.01233	0.08287	0.08923	0.01724	0.04224	0.005772	0.01411
1405	20271	SCN5A	10593	ankyrin binding	GO:0030506	molecular function	62	3	0.08599	0.02714	0.009711	0.8959	0.03	0.08287	0.08923	0.01716	0.0429	0.004234	0.02227
1406	20271	SCN5A	10593	fibroblast growth factor binding	GO:0017134	molecular function	62	2	0.08599	0.02727	0.009194	0.8917	0.03303	0.08287	0.08923	0.01724	0.04314	0.002885	0.0293
1407	20271	SCN5A	10593	regulation of ventricular cardiac muscle cell membrane repolarization	GO:0060307	biological process	62	3	0.08599	0.02755	0.008144	0.9196	0.01103	0.08287	0.08923	0.01764	0.04303	0.005148	0.01288
1408	20271	SCN5A	10593	regulation of atrial cardiac muscle cell membrane repolarization	GO:0060372	biological process	62	3	0.08599	0.02819	0.009722	0.9092	0.01248	0.08287	0.08923	0.01805	0.04403	0.006476	0.0146
1409	20271	SCN5A	10593	AV node cell action potential	GO:0086016	biological process	62	2	0.08599	0.02858	0.0147	0.8691	0.02106	0.08287	0.08923	0.01853	0.04407	0.008938	0.02417
1410	20271	SCN5A	10593	bundle of His cell action potential	GO:0086043	biological process	62	2	0.08599	0.02867	0.01464	0.8708	0.01972	0.08287	0.08923	0.0187	0.04396	0.009292	0.02308
1411	20271	SCN5A	10593	SA node cell action potential	GO:0086015	biological process	62	2	0.08599	0.02921	0.0153	0.8673	0.01825	0.08287	0.08923	0.01968	0.04336	0.01024	0.02287
1412	20271	SCN5A	10593	Z disc	GO:0030018	cellular component	62	3	0.08599	0.03077	0.01531	0.872	0.007285	0.08287	0.08923	0.02296	0.04123	0.01324	0.01769
1413	20271	SCN5A	10593	regulation of sodium ion transmembrane transport	GO:1902305	biological process	62	8	0.08599	0.03123	0.01184	0.8815	0.02825	0.08287	0.08923	0.0235	0.0415	0.005332	0.02631
1414	20271	SCN5A	10593	positive regulation of sodium ion transport	GO:0010765	biological process	62	5	0.08599	0.03247	0.01684	0.8599	0.01022	0.08287	0.08923	0.02565	0.04109	0.01409	0.02013
1415	20271	SCN5A	10593	T-tubule	GO:0030315	cellular component	62	3	0.08599	0.03282	0.01884	0.844	0.004115	0.08287	0.08923	0.02614	0.04121	0.01752	0.02027
1416	20271	SCN5A	10593	cellular response to calcium ion	GO:0071277	biological process	62	3	0.08599	0.03381	0.02048	0.8312	0.01394	0.08287	0.08923	0.02464	0.0464	0.0164	0.02557
1417	20271	SCN5A	10593	regulation of heart rate by cardiac conduction	GO:0086091	biological process	62	3	0.08599	0.03453	0.02326	0.8121	0.01641	0.08287	0.08923	0.0251	0.0475	0.01789	0.03023
1418	20271	SCN5A	10593	neuronal action potential	GO:0019228	biological process	62	2	0.08615	0.03573	0.02468	0.8035	0.0116	0.08276	0.08968	0.02561	0.04985	0.02053	0.02967
1419	20271	SCN5A	10593	ion channel binding	GO:0044325	molecular function	62	4	0.08654	0.02931	0.00988	0.8806	0.04847	0.08246	0.09082	0.01601	0.05366	0.002999	0.03255
1420	20271	SCN5A	10593	voltage-gated sodium channel activity	GO:0005248	molecular function	62	5	0.08654	0.03602	0.02417	0.8076	0.01875	0.08246	0.09082	0.02456	0.05282	0.01786	0.03271
1421	20271	SCN5A	10593	cell surface	GO:0009986	cellular component	62	7	0.08812	0.03649	0.02268	0.8168	0.03209	0.08116	0.09567	0.0221	0.06027	0.0134	0.03836
1422	20271	SCN5A	10593	integral component of membrane	GO:0016021	cellular component	62	18	0.08984	0.04404	0.03473	0.754	0.01588	0.07971	0.1013	0.02817	0.06885	0.02648	0.04555
1423	20271	SCN5A	10593	sodium ion transport	GO:0006814	biological process	62	4	0.09048	0.03785	0.02511	0.7997	0.04153	0.07919	0.1034	0.02034	0.07045	0.01227	0.0514
1424	20271	SCN5A	10593	cardiac muscle contraction	GO:0060048	biological process	62	2	0.0907	0.03685	0.02392	0.8042	0.04687	0.079	0.1041	0.01905	0.07127	0.01039	0.05507
1425	20271	SCN5A	10593	ubiquitin protein ligase binding	GO:0031625	molecular function	62	6	0.0907	0.04428	0.03598	0.7492	0.0193	0.079	0.1041	0.02804	0.06992	0.02581	0.05016
1426	20271	SCN5A	10593	sodium ion transmembrane transport	GO:0035725	biological process	62	8	0.09193	0.03984	0.02812	0.7866	0.03922	0.078	0.1084	0.02225	0.07135	0.0147	0.05377
1427	20271	SCN5A	10593	enzyme binding	GO:0019899	molecular function	62	34	0.09693	0.03777	0.02182	0.813	0.06928	0.07416	0.1267	0.01645	0.08674	0.006424	0.07409
1428	20271	SCN5A	10593	nucleoplasm	GO:0005654	cellular component	62	26	0.09856	0.05147	0.04419	0.72	0.03012	0.08269	0.1175	0.03177	0.08337	0.02656	0.07353
1429	20271	SCN5A	10593	intercalated disc	GO:0014704	cellular component	62	2	0.09889	0.04171	0.03104	0.7687	0.06208	0.07276	0.1344	0.01862	0.09343	0.01095	0.08799
1430	20271	SCN5A	10593	endoplasmic reticulum	GO:0005783	cellular component	62	18	0.0989	0.05175	0.04072	0.7328	0.04263	0.0835	0.1171	0.03116	0.08594	0.02011	0.08245
1431	20271	SCN5A	10593	regulation of ventricular cardiac muscle cell membrane depolarization	GO:0060373	biological process	62	2	0.09965	0.05431	0.04867	0.7055	0.02641	0.07739	0.1283	0.03373	0.08745	0.03132	0.07563
1432	20271	SCN5A	10593	plasma membrane	GO:0005886	cellular component	62	52	0.09996	0.05228	0.04261	0.7257	0.04084	0.07914	0.1263	0.02977	0.09182	0.02157	0.08416
1433	20271	SCN5A	10593	caveola	GO:0005901	cellular component	62	2	0.09998	0.04236	0.03252	0.7623	0.06344	0.07199	0.1389	0.01836	0.09774	0.0113	0.09362
1434	20271	SCN5A	10593	regulation of atrial cardiac muscle cell membrane depolarization	GO:0060371	biological process	62	2	0.1011	0.05567	0.0503	0.7011	0.02675	0.0783	0.1306	0.03503	0.08846	0.03222	0.07852
1435	20271	SCN5A	10593	protein kinase binding	GO:0019901	molecular function	62	21	0.1012	0.04711	0.04051	0.7309	0.05056	0.07115	0.144	0.02234	0.09935	0.01756	0.09343
1436	20271	SCN5A	10593	protein binding	GO:0005515	molecular function	62	237	0.1015	0.05389	0.04512	0.7173	0.03868	0.08355	0.1233	0.03237	0.0897	0.02357	0.08637
1437	20271	SCN5A	10593	voltage-gated sodium channel complex	GO:0001518	cellular component	62	3	0.1034	0.05099	0.04454	0.7175	0.04871	0.0742	0.1442	0.02535	0.1026	0.01994	0.09951
1438	20271	SCN5A	10593	regulation of cardiac muscle cell contraction	GO:0086004	biological process	62	7	0.1046	0.0622	0.05389	0.6912	0.025	0.08514	0.1285	0.0423	0.09147	0.0356	0.08159
1439	20271	SCN5A	10593	nucleolus	GO:0005730	cellular component	62	4	0.1067	0.05647	0.05085	0.6977	0.04777	0.07207	0.1581	0.02802	0.1138	0.02336	0.1107
1440	20271	SCN5A	10593	protein domain specific binding	GO:0019904	molecular function	62	77	0.1087	0.03975	0.01749	0.8049	0.103	0.06646	0.1778	0.0121	0.1306	0.002262	0.1352
1441	20271	SCN5A	10593	AV node cell to bundle of His cell communication	GO:0086067	biological process	62	4	0.1116	0.05765	0.05244	0.6928	0.05695	0.07234	0.1721	0.02556	0.13	0.02085	0.1319
1442	20271	SCN5A	10593	regulation of heart rate	GO:0002027	biological process	62	9	0.113	0.07072	0.06315	0.6683	0.02521	0.09091	0.1404	0.05021	0.09959	0.04219	0.09453
1443	244895	PEAK1	29431	focal adhesion assembly	GO:0048041	biological process	15	2	0.08599	0.05083	0.008162	0.9017	0.03334	0.08287	0.08923	0.04226	0.06114	0.002938	0.02268
1444	244895	PEAK1	29431	regulation of focal adhesion assembly	GO:0051893	biological process	15	6	0.08599	0.05083	0.01482	0.8751	0.008469	0.08287	0.08923	0.04226	0.06114	0.01253	0.01754
1445	244895	PEAK1	29431	identical protein binding	GO:0042802	molecular function	15	14	0.08599	0.05083	0.01742	0.855	0.006026	0.08287	0.08923	0.04226	0.06114	0.01573	0.01929
1446	244895	PEAK1	29431	protein autophosphorylation	GO:0046777	biological process	15	10	0.08599	0.05083	0.02344	0.8111	0.02026	0.08287	0.08923	0.04226	0.06114	0.01692	0.03247
1447	244895	PEAK1	29431	non-membrane spanning protein tyrosine kinase activity	GO:0004715	molecular function	15	3	0.08655	0.05126	0.02623	0.7951	0.01739	0.08245	0.09086	0.04228	0.06214	0.01986	0.03464
1448	244895	PEAK1	29431	protein phosphorylation	GO:0006468	biological process	15	28	0.08658	0.05277	0.03002	0.775	0.01802	0.08328	0.09002	0.04721	0.05899	0.02222	0.04056
1449	244895	PEAK1	29431	focal adhesion	GO:0005925	cellular component	15	6	0.09049	0.0557	0.03206	0.7663	0.026	0.08507	0.09626	0.04101	0.07565	0.02067	0.04974
1450	244895	PEAK1	29431	cell migration	GO:0016477	biological process	15	38	0.09105	0.0528	0.0348	0.7543	0.02007	0.0797	0.104	0.04202	0.06635	0.02466	0.0491
1451	244895	PEAK1	29431	substrate adhesion-dependent cell spreading	GO:0034446	biological process	15	5	0.09717	0.05865	0.04386	0.7209	0.02397	0.08486	0.1113	0.04145	0.083	0.02923	0.06582
1452	244895	PEAK1	29431	protein kinase activity	GO:0004672	molecular function	15	29	0.1025	0.06034	0.04026	0.734	0.05257	0.08375	0.1255	0.04229	0.0861	0.01685	0.0962
1453	244895	PEAK1	29431	protein binding	GO:0005515	molecular function	15	237	0.1161	0.07059	0.06656	0.6607	0.0217	0.09595	0.1406	0.05257	0.09479	0.04706	0.09415
1454	244895	PEAK1	29431	actin cytoskeleton	GO:0015629	cellular component	15	6	0.1211	0.07697	0.07243	0.6481	0.02145	0.1042	0.1407	0.061	0.09711	0.05134	0.1022
1455	171486	CD99L2	18237	focal adhesion	GO:0005925	cellular component	2	6	0.09687	0.09054	0.04527	0.7164	0.02132	0.08425	0.1114	0.06308	0.13	0.03154	0.06498
1456	171486	CD99L2	18237	protein binding	GO:0005515	molecular function	2	237	0.1634	0.1174	0.1174	0.5723	0.02068	0.1301	0.2052	0.08661	0.1591	0.08661	0.1591
1457	13489	DRD2	3023	response to histamine	GO:0034776	biological process	31	4	0.08599	0.08464	0.01486	0.8709	0.01668	0.08287	0.08923	0.072	0.09951	0.0102	0.02164
1458	13489	DRD2	3023	negative regulation of voltage-gated calcium channel activity	GO:1901386	biological process	31	5	0.08599	0.08464	0.02271	0.8159	0.01956	0.08287	0.08923	0.072	0.09951	0.01656	0.03112
1459	13489	DRD2	3023	adenylate cyclase-activating adrenergic receptor signaling pathway	GO:0071880	biological process	31	4	0.08645	0.08464	0.02743	0.7878	0.01234	0.084	0.08897	0.072	0.09951	0.02227	0.0338
1460	13489	DRD2	3023	glutamatergic synapse	GO:0098978	cellular component	31	5	0.08671	0.08464	0.02235	0.8162	0.03671	0.08332	0.09024	0.072	0.09951	0.01187	0.0421
1461	13489	DRD2	3023	phospholipase C-activating dopamine receptor signaling pathway	GO:0060158	biological process	31	3	0.08685	0.08464	0.03235	0.7641	0.004391	0.08275	0.09114	0.072	0.09951	0.03005	0.03483
1462	13489	DRD2	3023	negative regulation of synaptic transmission, glutamatergic	GO:0051967	biological process	31	4	0.08871	0.08464	0.03558	0.7504	0.01116	0.08066	0.09757	0.072	0.09951	0.02945	0.04298
1463	13489	DRD2	3023	regulation of potassium ion transport	GO:0043266	biological process	31	5	0.08945	0.08464	0.03171	0.7679	0.03179	0.08878	0.09012	0.072	0.09951	0.01878	0.05356
1464	13489	DRD2	3023	regulation of dopamine secretion	GO:0014059	biological process	31	4	0.08951	0.08464	0.03187	0.7668	0.02254	0.08175	0.09801	0.072	0.09951	0.02196	0.04626
1465	13489	DRD2	3023	identical protein binding	GO:0042802	molecular function	31	14	0.09013	0.08464	0.03516	0.7526	0.01989	0.08297	0.09792	0.072	0.09951	0.02512	0.04919
1466	13489	DRD2	3023	adenylate cyclase-inhibiting dopamine receptor signaling pathway	GO:0007195	biological process	31	3	0.0915	0.08464	0.0335	0.76	0.02636	0.08383	0.09986	0.072	0.09951	0.02169	0.05174
1467	13489	DRD2	3023	non-motile cilium	GO:0097730	cellular component	31	5	0.09211	0.08464	0.02376	0.7895	0.05853	0.08177	0.1037	0.072	0.09951	0.006795	0.08307
1468	13489	DRD2	3023	positive regulation of glial cell-derived neurotrophic factor production	GO:1900168	biological process	31	3	0.09229	0.09122	0.02873	0.7827	0.04448	0.08005	0.1064	0.06798	0.1224	0.0137	0.06027
1469	13489	DRD2	3023	positive regulation of cytosolic calcium ion concentration involved in phospholipase C-activating G protein-coupled signaling pathway	GO:0051482	biological process	31	2	0.1014	0.09611	0.04386	0.7201	0.04566	0.07878	0.1306	0.06491	0.1423	0.02062	0.09329
1470	13489	DRD2	3023	negative regulation of adenylate cyclase activity	GO:0007194	biological process	31	6	0.1117	0.09922	0.06198	0.6705	0.03266	0.08119	0.1536	0.0737	0.1336	0.03667	0.1047
1471	13489	DRD2	3023	dopamine neurotransmitter receptor activity, coupled via Gi/Go	GO:0001591	molecular function	31	2	0.1117	0.09854	0.06132	0.6722	0.02682	0.09208	0.1356	0.06871	0.1413	0.03967	0.09478
1472	13489	DRD2	3023	plasma membrane	GO:0005886	cellular component	31	52	0.121	0.1064	0.07132	0.6496	0.03122	0.09102	0.1609	0.07106	0.1593	0.04313	0.1179
1473	13489	DRD2	3023	integral component of plasma membrane	GO:0005887	cellular component	31	31	0.1213	0.1083	0.07278	0.6472	0.02159	0.09953	0.1479	0.07652	0.1532	0.0516	0.1027
1474	13489	DRD2	3023	protein binding	GO:0005515	molecular function	31	237	0.1269	0.1089	0.07722	0.637	0.0359	0.09084	0.1773	0.07007	0.1693	0.04355	0.1369
1475	13489	DRD2	3023	negative regulation of protein secretion	GO:0050709	biological process	31	15	0.1325	0.1233	0.08429	0.6254	0.01555	0.1147	0.1531	0.1072	0.1419	0.06617	0.1074
1476	13489	DRD2	3023	ciliary membrane	GO:0060170	cellular component	31	7	0.1381	0.1233	0.09147	0.6127	0.01151	0.122	0.1563	0.1072	0.1419	0.07665	0.1091
1477	13489	DRD2	3023	negative regulation of cytosolic calcium ion concentration	GO:0051481	biological process	31	3	0.1473	0.1245	0.09942	0.5975	0.03562	0.1045	0.2077	0.07901	0.1962	0.05878	0.1681
1478	13489	DRD2	3023	positive regulation of cytokinesis	GO:0032467	biological process	31	8	0.1482	0.1265	0.09747	0.5988	0.04889	0.09269	0.2369	0.07353	0.2175	0.04542	0.2092
1479	13489	DRD2	3023	cilium	GO:0005929	cellular component	31	8	0.172	0.1474	0.1267	0.5585	0.02912	0.1279	0.2312	0.1021	0.2128	0.08286	0.1938
1480	13489	DRD2	3023	arachidonic acid secretion	GO:0050482	biological process	31	3	0.1858	0.1546	0.1404	0.5398	0.03648	0.1291	0.2674	0.1001	0.2388	0.08449	0.2334
1481	13489	DRD2	3023	integral component of presynaptic membrane	GO:0099056	cellular component	31	5	0.2091	0.1718	0.165	0.5138	0.01645	0.1786	0.2447	0.1374	0.2149	0.1323	0.2058
1482	13489	DRD2	3023	G protein-coupled receptor activity	GO:0004930	molecular function	31	50	0.2374	0.1955	0.1955	0.4823	0.0168	0.2053	0.2746	0.1589	0.2405	0.1589	0.2405
1483	228777	NRSN2	16229	transport vesicle	GO:0030133	cellular component	6	10	0.08599	0.07229	0.01992	0.8344	0.02292	0.08287	0.08923	0.04522	0.1156	0.01366	0.02903
1484	228777	NRSN2	16229	plasma membrane	GO:0005886	cellular component	6	52	0.09454	0.0743	0.03783	0.742	0.02982	0.08466	0.1056	0.04904	0.1126	0.02287	0.06259
1485	228777	NRSN2	16229	neuron projection	GO:0043005	cellular component	6	27	0.09571	0.07229	0.03284	0.7631	0.04715	0.08577	0.1068	0.04522	0.1156	0.01483	0.07272
1486	228777	NRSN2	16229	protein binding	GO:0005515	molecular function	6	237	0.1243	0.09733	0.07621	0.6408	0.01501	0.108	0.1432	0.07542	0.1256	0.06016	0.09656
1487	228777	NRSN2	16229	neuronal cell body	GO:0043025	cellular component	6	6	0.1333	0.1036	0.08484	0.6214	0.04337	0.08486	0.2095	0.06509	0.1648	0.04427	0.1626
1488	228777	NRSN2	16229	nervous system development	GO:0007399	biological process	6	3	0.1872	0.1473	0.139	0.5389	0.05054	0.1118	0.3137	0.07301	0.2971	0.06949	0.2779
1489	13162	SLC6A3	11049	monoamine transmembrane transporter activity	GO:0008504	molecular function	24	8	0.08599	0.03371	0.003793	0.9487	0.008826	0.08287	0.08923	0.02565	0.04431	0.001832	0.007851
1490	13162	SLC6A3	11049	dopamine uptake	GO:0090494	biological process	24	4	0.08599	0.03519	0.004171	0.9419	0.01496	0.08287	0.08923	0.02515	0.04925	0.001512	0.01151
1491	13162	SLC6A3	11049	dopamine uptake involved in synaptic transmission	GO:0051583	biological process	24	3	0.08599	0.03519	0.009376	0.9087	0.01443	0.08287	0.08923	0.02515	0.04925	0.005171	0.017
1492	13162	SLC6A3	11049	norepinephrine:sodium symporter activity	GO:0005334	molecular function	24	4	0.08599	0.03519	0.0115	0.9006	0.005744	0.08287	0.08923	0.02515	0.04925	0.009765	0.01354
1493	13162	SLC6A3	11049	dopamine:sodium symporter activity	GO:0005330	molecular function	24	4	0.08599	0.03519	0.01179	0.8988	0.004211	0.08287	0.08923	0.02515	0.04925	0.01042	0.01333
1494	13162	SLC6A3	11049	axon	GO:0030424	cellular component	24	12	0.08599	0.03519	0.01151	0.8827	0.03561	0.08287	0.08923	0.02515	0.04925	0.005152	0.02573
1495	13162	SLC6A3	11049	integral component of plasma membrane	GO:0005887	cellular component	24	31	0.08599	0.03519	0.01454	0.8729	0.01661	0.08287	0.08923	0.02515	0.04925	0.009806	0.02156
1496	13162	SLC6A3	11049	norepinephrine transport	GO:0015874	biological process	24	4	0.08599	0.03519	0.01596	0.8596	0.02214	0.08287	0.08923	0.02515	0.04925	0.01001	0.02545
1497	13162	SLC6A3	11049	dopamine transport	GO:0015872	biological process	24	5	0.08599	0.03519	0.01652	0.859	0.0205	0.08287	0.08923	0.02515	0.04925	0.01148	0.02377
1498	13162	SLC6A3	11049	neuron projection	GO:0043005	cellular component	24	27	0.08599	0.03759	0.02207	0.8207	0.01915	0.08287	0.08923	0.02988	0.04729	0.01623	0.03001
1499	13162	SLC6A3	11049	cell surface	GO:0009986	cellular component	24	7	0.08599	0.03759	0.02409	0.8068	0.00854	0.08287	0.08923	0.02988	0.04729	0.02106	0.02756
1500	13162	SLC6A3	11049	sodium ion transmembrane transport	GO:0035725	biological process	24	8	0.08604	0.03759	0.02309	0.8139	0.01166	0.08284	0.08936	0.02988	0.04729	0.01923	0.02771
1501	13162	SLC6A3	11049	plasma membrane	GO:0005886	cellular component	24	52	0.08871	0.04056	0.02968	0.7766	0.01979	0.08066	0.09757	0.02806	0.05864	0.0213	0.04134
1502	13162	SLC6A3	11049	neuronal cell body membrane	GO:0032809	cellular component	24	4	0.08956	0.04056	0.02989	0.7764	0.02535	0.07995	0.1003	0.02806	0.05864	0.01967	0.0454
1503	13162	SLC6A3	11049	presynaptic membrane	GO:0042734	cellular component	24	2	0.09068	0.03868	0.02414	0.8054	0.04353	0.07902	0.1041	0.02374	0.06303	0.01134	0.05138
1504	13162	SLC6A3	11049	flotillin complex	GO:0016600	cellular component	24	2	0.09226	0.04937	0.04103	0.7303	0.01562	0.08437	0.1009	0.04161	0.05858	0.03146	0.05352
1505	13162	SLC6A3	11049	monoamine transport	GO:0015844	biological process	24	6	0.09369	0.04325	0.02866	0.7825	0.04667	0.07661	0.1146	0.02619	0.0714	0.01315	0.06248
1506	13162	SLC6A3	11049	membrane raft	GO:0045121	cellular component	24	5	0.1022	0.05726	0.05148	0.6974	0.02838	0.07784	0.1341	0.0374	0.08766	0.03218	0.08235
1507	13162	SLC6A3	11049	protein binding	GO:0005515	molecular function	24	237	0.1063	0.06007	0.05748	0.6827	0.007347	0.09542	0.1185	0.05001	0.07216	0.05082	0.06502
1508	13162	SLC6A3	11049	neuronal cell body	GO:0043025	cellular component	24	6	0.1295	0.08053	0.0779	0.633	0.05264	0.07673	0.2184	0.03775	0.1718	0.03526	0.1721
1509	225870	RIN1	18749	plasma membrane	GO:0005886	cellular component	5	52	0.08599	0.03199	0.01981	0.8364	0.006225	0.08287	0.08923	0.02439	0.04195	0.01789	0.02193
1510	225870	RIN1	18749	protein binding	GO:0005515	molecular function	5	237	0.08717	0.03199	0.02694	0.7907	0.01815	0.08195	0.09273	0.02439	0.04195	0.01993	0.0364
1511	225870	RIN1	18749	cytoplasm	GO:0005737	cellular component	5	35	0.08888	0.03199	0.03199	0.7657	0.01612	0.08072	0.09786	0.02439	0.04195	0.02439	0.04195
1512	11441	CHRNA7	1960	synaptic transmission, cholinergic	GO:0007271	biological process	42	2	0.08599	0.08491	0.007794	0.9183	0.01398	0.08287	0.08923	0.07262	0.09928	0.003627	0.01675
1513	11441	CHRNA7	1960	calcium ion transport	GO:0006816	biological process	42	9	0.08599	0.08491	0.01717	0.8562	0.01436	0.08287	0.08923	0.07262	0.09928	0.01348	0.02186
1514	11441	CHRNA7	1960	response to acetylcholine	GO:1905144	biological process	42	5	0.08599	0.08491	0.01721	0.8514	0.02901	0.08287	0.08923	0.07262	0.09928	0.0102	0.02902
1515	11441	CHRNA7	1960	acetylcholine-gated cation-selective channel activity	GO:0022848	molecular function	42	4	0.08599	0.08491	0.02019	0.8333	0.02197	0.08287	0.08923	0.07262	0.09928	0.01418	0.02873
1516	11441	CHRNA7	1960	cognition	GO:0050890	biological process	42	4	0.08615	0.08491	0.02063	0.8258	0.02944	0.08276	0.08968	0.07262	0.09928	0.01219	0.0349
1517	11441	CHRNA7	1960	cellular calcium ion homeostasis	GO:0006874	biological process	42	12	0.08713	0.08491	0.0314	0.7685	0.01063	0.0834	0.09103	0.07262	0.09928	0.02625	0.03755
1518	11441	CHRNA7	1960	ion channel activity	GO:0005216	molecular function	42	11	0.08726	0.08491	0.03226	0.7646	0.01833	0.08516	0.0894	0.07262	0.09928	0.0237	0.04391
1519	11441	CHRNA7	1960	ion transmembrane transport	GO:0034220	biological process	42	9	0.0877	0.08491	0.02986	0.7764	0.02123	0.0831	0.09255	0.07262	0.09928	0.02115	0.04215
1520	11441	CHRNA7	1960	neuron projection	GO:0043005	cellular component	42	27	0.08845	0.08491	0.03238	0.7639	0.015	0.08592	0.09105	0.07262	0.09928	0.02515	0.0417
1521	11441	CHRNA7	1960	integral component of plasma membrane	GO:0005887	cellular component	42	31	0.08846	0.08491	0.03388	0.7575	0.01017	0.08591	0.09108	0.07262	0.09928	0.02854	0.04022
1522	11441	CHRNA7	1960	plasma membrane	GO:0005886	cellular component	42	52	0.08891	0.08491	0.03655	0.7466	0.003931	0.08521	0.09277	0.07262	0.09928	0.03423	0.03902
1523	11441	CHRNA7	1960	nervous system process	GO:0050877	biological process	42	18	0.09125	0.08529	0.03585	0.7499	0.02068	0.08002	0.104	0.07289	0.0998	0.02517	0.05108
1524	11441	CHRNA7	1960	chloride channel regulator activity	GO:0017081	molecular function	42	3	0.09253	0.08529	0.04164	0.7283	0.001794	0.08596	0.09959	0.07289	0.0998	0.04036	0.04296
1525	11441	CHRNA7	1960	chemical synaptic transmission	GO:0007268	biological process	42	18	0.09383	0.08993	0.03944	0.7359	0.02464	0.08386	0.105	0.06949	0.1164	0.02594	0.05996
1526	11441	CHRNA7	1960	synapse	GO:0045202	cellular component	42	20	0.09572	0.08529	0.04043	0.7329	0.02655	0.08371	0.1095	0.07289	0.0998	0.02577	0.06343
1527	11441	CHRNA7	1960	response to nicotine	GO:0035094	biological process	42	3	0.09618	0.08529	0.04617	0.7145	0.004114	0.08857	0.1045	0.07289	0.0998	0.0429	0.0497
1528	11441	CHRNA7	1960	response to hypoxia	GO:0001666	biological process	42	7	0.1016	0.09213	0.04537	0.7157	0.03778	0.07797	0.1323	0.07318	0.116	0.02416	0.0852
1529	11441	CHRNA7	1960	acetylcholine binding	GO:0042166	molecular function	42	3	0.1061	0.09536	0.05196	0.6959	0.03754	0.08372	0.1344	0.07029	0.1294	0.02792	0.0967
1530	11441	CHRNA7	1960	amyloid-beta binding	GO:0001540	molecular function	42	3	0.1067	0.09598	0.04943	0.7029	0.04554	0.08413	0.1353	0.07132	0.1292	0.02322	0.1052
1531	11441	CHRNA7	1960	protein homodimerization activity	GO:0042803	molecular function	42	10	0.1108	0.09955	0.06232	0.6709	0.01525	0.1021	0.1202	0.08411	0.1178	0.04868	0.07978
1532	11441	CHRNA7	1960	acetylcholine receptor activity	GO:0015464	molecular function	42	4	0.1127	0.09608	0.06326	0.6684	0.02179	0.09317	0.1364	0.06968	0.1325	0.0445	0.08993
1533	11441	CHRNA7	1960	protein binding	GO:0005515	molecular function	42	237	0.122	0.1053	0.07372	0.6454	0.01764	0.1091	0.1365	0.084	0.1321	0.05546	0.09797
1534	11441	CHRNA7	1960	acetylcholine-gated channel complex	GO:0005892	cellular component	42	3	0.1221	0.1084	0.07095	0.6493	0.04072	0.08544	0.1746	0.07416	0.1585	0.03649	0.138
1535	11441	CHRNA7	1960	neurotransmitter receptor activity	GO:0030594	molecular function	42	9	0.1259	0.107	0.07173	0.6468	0.04638	0.08439	0.1878	0.07116	0.1608	0.03456	0.1489
1536	11441	CHRNA7	1960	activation of MAPK activity	GO:0000187	biological process	42	7	0.135	0.116	0.08057	0.6281	0.05279	0.08388	0.2172	0.07221	0.1862	0.03491	0.186
1537	11441	CHRNA7	1960	negative regulation of amyloid-beta formation	GO:1902430	biological process	42	4	0.1427	0.1225	0.09429	0.6069	0.02994	0.1051	0.1938	0.08119	0.1848	0.05909	0.1505
1538	11441	CHRNA7	1960	regulation of membrane potential	GO:0042391	biological process	42	24	0.1556	0.1327	0.1094	0.5848	0.005595	0.1478	0.1638	0.1122	0.1569	0.1007	0.1189
1539	11441	CHRNA7	1960	signal transduction	GO:0007165	biological process	42	46	0.1641	0.1369	0.111	0.576	0.05695	0.09447	0.2849	0.07446	0.2518	0.0467	0.264
1540	11441	CHRNA7	1960	toxic substance binding	GO:0015643	molecular function	42	2	0.1654	0.1375	0.1165	0.573	0.02691	0.1307	0.2093	0.1092	0.1731	0.0779	0.1742
1541	11441	CHRNA7	1960	negative regulation of tumor necrosis factor production	GO:0032720	biological process	42	3	0.1914	0.1586	0.1461	0.5333	0.03452	0.1346	0.2724	0.1049	0.2398	0.0921	0.2318
1542	11441	CHRNA7	1960	regulation of amyloid precursor protein catabolic process	GO:1902991	biological process	42	7	0.193	0.1604	0.1477	0.5337	0.01713	0.16	0.2328	0.126	0.2041	0.1173	0.186
1543	11441	CHRNA7	1960	positive regulation of angiogenesis	GO:0045766	biological process	42	7	0.199	0.1666	0.1528	0.5237	0.04343	0.1284	0.3085	0.1012	0.274	0.08604	0.2714
1544	11441	CHRNA7	1960	positive regulation of cell population proliferation	GO:0008284	biological process	42	33	0.2153	0.1817	0.1693	0.5039	0.04801	0.1309	0.354	0.1049	0.3147	0.08775	0.3265
1545	18164	NPTX1	7952	neuron projection	GO:0043005	cellular component	7	27	0.08599	0.02944	0.01279	0.886	0.01895	0.08287	0.08923	0.0265	0.0327	0.008471	0.01933
1546	18164	NPTX1	7952	glutamatergic synapse	GO:0098978	cellular component	7	5	0.08599	0.02944	0.01422	0.8774	0.01466	0.08287	0.08923	0.0265	0.0327	0.01042	0.01942
1547	18164	NPTX1	7952	plasma membrane	GO:0005886	cellular component	7	52	0.08678	0.03552	0.02972	0.776	0.01295	0.08475	0.08886	0.02853	0.04422	0.02391	0.03693
1548	18164	NPTX1	7952	regulation of postsynaptic neurotransmitter receptor activity	GO:0098962	biological process	7	5	0.08861	0.03588	0.0284	0.7836	0.02537	0.08074	0.09725	0.02614	0.04925	0.01877	0.04297
1549	18164	NPTX1	7952	axonogenesis involved in innervation	GO:0060385	biological process	7	2	0.09083	0.03736	0.03471	0.7545	0.02028	0.07925	0.1041	0.0276	0.05057	0.02449	0.0492
1550	77018	COL25A1	18603	collagen-containing extracellular matrix	GO:0062023	cellular component	6	14	0.08671	0.1127	0.02802	0.7849	0.01589	0.08444	0.08903	0.08801	0.1443	0.02157	0.0364
1551	77018	COL25A1	18603	integral component of plasma membrane	GO:0005887	cellular component	6	31	0.1018	0.1166	0.05233	0.6961	0.0101	0.1008	0.1029	0.08668	0.157	0.04417	0.06199
1552	77018	COL25A1	18603	amyloid-beta binding	GO:0001540	molecular function	6	3	0.1073	0.1166	0.05776	0.6816	0.01888	0.09742	0.1183	0.08668	0.157	0.04217	0.07912
1553	77018	COL25A1	18603	heparin binding	GO:0008201	molecular function	6	6	0.1849	0.1664	0.1368	0.5447	0.03453	0.1354	0.2526	0.09595	0.2884	0.08311	0.225
1554	77018	COL25A1	18603	extracellular region	GO:0005576	cellular component	6	6	0.1942	0.171	0.1435	0.5334	0.05024	0.1221	0.3088	0.09443	0.3098	0.07099	0.2901
1555	77018	COL25A1	18603	extracellular space	GO:0005615	cellular component	6	17	0.2079	0.1852	0.1618	0.5132	0.04512	0.1318	0.3277	0.123	0.2789	0.09018	0.2903
1556	72585	LYPD1	28431	acetylcholine receptor inhibitor activity	GO:0030550	molecular function	4	4	0.08599	0.01201	0.006005	0.9359	0.004279	0.08287	0.08923	0.009137	0.01579	0.004568	0.007894
1557	72585	LYPD1	28431	acetylcholine receptor signaling pathway	GO:0095500	biological process	4	3	0.08599	0.0158	0.0158	0.8616	0.02533	0.08287	0.08923	0.009672	0.0258	0.009672	0.0258
1558	320271	SCAI	26709	negative regulation of cell migration	GO:0030336	biological process	6	28	0.2069	0.4622	0.1631	0.516	0.01586	0.1741	0.2459	0.4107	0.5201	0.1318	0.2019
1559	320271	SCAI	26709	nucleus	GO:0005634	cellular component	6	48	0.2951	0.4622	0.2583	0.4266	0.01271	0.2582	0.3374	0.4107	0.5201	0.223	0.2993
1560	320271	SCAI	26709	transcription corepressor activity	GO:0003714	molecular function	6	4	0.3115	0.4622	0.2759	0.4099	0.03318	0.2264	0.4286	0.4107	0.5201	0.1887	0.4033
1561	320271	SCAI	26709	nucleoplasm	GO:0005654	cellular component	6	26	0.364	0.4622	0.3336	0.3702	0.005255	0.3522	0.3761	0.4107	0.5201	0.3159	0.3522
1562	320271	SCAI	26709	protein binding	GO:0005515	molecular function	6	237	0.4031	0.4646	0.3774	0.3399	0.01728	0.3462	0.4695	0.4088	0.5281	0.319	0.4464
1563	320271	SCAI	26709	nuclear membrane	GO:0031965	cellular component	6	7	0.5798	0.5655	0.5655	0.2268	0.01881	0.5059	0.6645	0.4911	0.6513	0.4911	0.6513
1564	100041581	ZNF483	23384	DNA-binding transcription factor activity, RNA polymerase II-specific	GO:0000981	molecular function	4	13	0.08599	0.03884	0.01558	0.8701	0.006148	0.08287	0.08923	0.03333	0.04527	0.01376	0.01764
1565	100041581	ZNF483	23384	RNA polymerase II cis-regulatory region sequence-specific DNA binding	GO:0000978	molecular function	4	22	0.08599	0.03884	0.01991	0.8354	0.007853	0.08287	0.08923	0.03333	0.04527	0.01756	0.02257
1566	100041581	ZNF483	23384	regulation of transcription by RNA polymerase II	GO:0006357	biological process	4	42	0.08655	0.04273	0.03205	0.7654	0.0128	0.08398	0.0892	0.03449	0.05294	0.02587	0.03971
1567	100041581	ZNF483	23384	nucleus	GO:0005634	cellular component	4	48	0.1098	0.0611	0.0611	0.6739	0.01359	0.09541	0.1265	0.04894	0.07627	0.04894	0.07627
1568	67569	MGAT4C	30871	protein N-linked glycosylation	GO:0006487	biological process	4	6	0.1049	0.09583	0.04792	0.7073	0.04633	0.07894	0.1395	0.0446	0.2059	0.0223	0.103
1569	67569	MGAT4C	30871	acetylglucosaminyltransferase activity	GO:0008375	molecular function	4	36	0.3078	0.2726	0.2726	0.414	0.02368	0.2455	0.3859	0.2092	0.3553	0.2092	0.3553
1570	106639	VMAC	33803	protein binding	GO:0005515	molecular function	2	237	0.4544	0.7008	0.4326	0.3048	0.01847	0.3913	0.5277	0.6099	0.8054	0.3678	0.5088
1571	106639	VMAC	33803	type III intermediate filament	GO:0045098	cellular component	2	2	0.7075	0.7008	0.7008	0.1491	0.02396	0.6174	0.8107	0.6099	0.8054	0.6099	0.8054
1572	68075	LURAP1	32327	cytosol	GO:0005829	cellular component	8	32	0.08599	0.01968	0.01117	0.9	0.01252	0.08287	0.08923	0.01568	0.02469	0.007819	0.01595
1573	68075	LURAP1	32327	protein binding	GO:0005515	molecular function	8	237	0.08599	0.01968	0.01233	0.8925	0.01072	0.08287	0.08923	0.01568	0.02469	0.009148	0.01662
1574	68075	LURAP1	32327	intracellular membrane-bounded organelle	GO:0043231	cellular component	8	39	0.08599	0.01968	0.0133	0.8811	0.02039	0.08287	0.08923	0.01568	0.02469	0.008425	0.02099
1575	68075	LURAP1	32327	cytoplasm	GO:0005737	cellular component	8	35	0.08599	0.01968	0.01345	0.8809	0.01759	0.08287	0.08923	0.01568	0.02469	0.008925	0.02027
1576	68075	LURAP1	32327	positive regulation of I-kappaB kinase/NF-kappaB signaling	GO:0043123	biological process	8	5	0.08599	0.01994	0.01408	0.8798	0.01146	0.08287	0.08923	0.01594	0.02495	0.01067	0.01858
1577	68075	LURAP1	32327	positive regulation of cytokine production	GO:0001819	biological process	8	55	0.1022	0.04669	0.04669	0.7112	0.03909	0.07751	0.1348	0.02439	0.08939	0.02439	0.08939
1578	26381	ESRRG	3474	sequence-specific double-stranded DNA binding	GO:1990837	molecular function	7	15	0.08599	0.02732	0.008246	0.9218	0.005526	0.08287	0.08923	0.02134	0.03497	0.006396	0.01063
1579	26381	ESRRG	3474	nuclear receptor activity	GO:0004879	molecular function	7	3	0.08599	0.02732	0.01207	0.8901	0.01658	0.08287	0.08923	0.02134	0.03497	0.007376	0.01974
1580	26381	ESRRG	3474	RNA polymerase II cis-regulatory region sequence-specific DNA binding	GO:0000978	molecular function	7	22	0.08599	0.02738	0.01618	0.8614	0.01728	0.08287	0.08923	0.02147	0.03492	0.01141	0.02295
1581	26381	ESRRG	3474	regulation of transcription by RNA polymerase II	GO:0006357	biological process	7	42	0.08599	0.02738	0.0199	0.8355	0.01672	0.08287	0.08923	0.02147	0.03492	0.01523	0.02602
1582	26381	ESRRG	3474	regulation of transcription, DNA-templated	GO:0006355	biological process	7	28	0.08599	0.02849	0.02374	0.809	0.01553	0.08287	0.08923	0.02222	0.03652	0.01852	0.03044
1583	26381	ESRRG	3474	protein binding	GO:0005515	molecular function	7	237	0.1235	0.07605	0.07605	0.6408	0.01693	0.1037	0.1471	0.05805	0.09963	0.05805	0.09963
1584	232174	CYP26B1	20581	retinoic acid catabolic process	GO:0034653	biological process	14	5	0.08599	0.1064	0.02068	0.8296	0.01652	0.08287	0.08923	0.07377	0.1534	0.01587	0.02696
1585	232174	CYP26B1	20581	retinoic acid 4-hydroxylase activity	GO:0008401	molecular function	14	4	0.08616	0.1064	0.03092	0.7705	0.01179	0.0833	0.08912	0.07377	0.1534	0.02536	0.0377
1586	232174	CYP26B1	20581	retinoic acid metabolic process	GO:0042573	biological process	14	8	0.09076	0.1064	0.03797	0.7417	0.01506	0.07915	0.1041	0.07377	0.1534	0.02924	0.0493
1587	232174	CYP26B1	20581	monooxygenase activity	GO:0004497	molecular function	14	62	0.109	0.1203	0.06051	0.6751	0.012	0.09417	0.1262	0.09148	0.1582	0.04971	0.07365
1588	232174	CYP26B1	20581	sterol metabolic process	GO:0016125	biological process	14	11	0.1101	0.113	0.05608	0.6846	0.04302	0.0804	0.1507	0.07613	0.1677	0.02746	0.1145
1589	232174	CYP26B1	20581	bone morphogenesis	GO:0060349	biological process	14	6	0.1134	0.1276	0.06422	0.6659	0.02258	0.0939	0.137	0.09168	0.1777	0.04473	0.0922
1590	232174	CYP26B1	20581	retinoic acid binding	GO:0001972	molecular function	14	4	0.1195	0.129	0.04832	0.6994	0.0874	0.06067	0.2355	0.06352	0.2618	0.01242	0.188
1591	232174	CYP26B1	20581	protein binding	GO:0005515	molecular function	14	237	0.1636	0.1759	0.1172	0.5727	0.01864	0.1382	0.1937	0.1344	0.2301	0.08962	0.1534
1592	232174	CYP26B1	20581	cytoplasm	GO:0005737	cellular component	14	35	0.1949	0.2129	0.145	0.5318	0.04869	0.1252	0.3035	0.1283	0.3533	0.07486	0.2808
1593	232174	CYP26B1	20581	oxidoreductase activity	GO:0016491	molecular function	14	86	0.3306	0.3315	0.2956	0.3936	0.03926	0.2331	0.4688	0.2328	0.4721	0.1929	0.453
1594	232174	CYP26B1	20581	xenobiotic metabolic process	GO:0006805	biological process	14	32	0.3616	0.3566	0.326	0.3653	0.06067	0.2208	0.5923	0.2121	0.5996	0.1817	0.5848
1595	232174	CYP26B1	20581	oxidoreductase activity, acting on paired donors, with incorporation or reduction of molecular oxygen, NAD(P)H as one donor, and incorporation of one atom of oxygen	GO:0016709	molecular function	14	303	0.4244	0.4228	0.3989	0.3254	0.0215	0.3581	0.503	0.3482	0.5133	0.324	0.4912
1596	75296	CEP43	17012	centriole	GO:0005814	cellular component	19	4	0.08599	0.1545	0.01987	0.8336	0.02211	0.08287	0.08923	0.09614	0.2484	0.01355	0.02914
1597	75296	CEP43	17012	negative regulation of protein kinase activity	GO:0006469	biological process	19	11	0.0924	0.1808	0.04101	0.7305	0.01377	0.08484	0.1006	0.1469	0.2226	0.03238	0.05193
1598	75296	CEP43	17012	protein tyrosine kinase inhibitor activity	GO:0030292	molecular function	19	4	0.09945	0.1635	0.0426	0.7256	0.03391	0.08217	0.1204	0.0932	0.2867	0.02402	0.07558
1599	75296	CEP43	17012	centrosome	GO:0005813	cellular component	19	9	0.1132	0.1718	0.04816	0.7064	0.0681	0.07718	0.1661	0.09014	0.3273	0.01589	0.1459
1600	75296	CEP43	17012	perinuclear region of cytoplasm	GO:0048471	cellular component	19	5	0.1551	0.2276	0.1078	0.5847	0.03461	0.1071	0.2246	0.1574	0.3291	0.06456	0.18
1601	75296	CEP43	17012	protein kinase binding	GO:0019901	molecular function	19	21	0.1799	0.2331	0.1331	0.5495	0.03445	0.1244	0.26	0.1596	0.3404	0.08085	0.2192
1602	75296	CEP43	17012	nucleus	GO:0005634	cellular component	19	48	0.1953	0.2276	0.15	0.5303	0.024	0.1521	0.2507	0.1574	0.3291	0.1091	0.2062
1603	75296	CEP43	17012	positive regulation of cell population proliferation	GO:0008284	biological process	19	33	0.2091	0.2361	0.1642	0.5109	0.0428	0.1353	0.3234	0.1588	0.351	0.093	0.2899
1604	75296	CEP43	17012	protein homodimerization activity	GO:0042803	molecular function	19	10	0.2313	0.2342	0.1894	0.4878	0.02053	0.1861	0.2875	0.1599	0.3431	0.1454	0.2466
1605	75296	CEP43	17012	protein binding	GO:0005515	molecular function	19	237	0.2457	0.2378	0.2051	0.4731	0.01594	0.2066	0.2921	0.1671	0.3384	0.1682	0.2501
1606	75296	CEP43	17012	positive regulation of cell migration	GO:0030335	biological process	19	28	0.2485	0.2397	0.2055	0.4687	0.04264	0.1622	0.3805	0.1585	0.3625	0.1198	0.3527
1607	75296	CEP43	17012	positive regulation of cell growth	GO:0030307	biological process	19	14	0.3094	0.2791	0.2712	0.4096	0.05145	0.1895	0.5052	0.162	0.4811	0.1487	0.4946
1608	545192	BAIAP3	948	SNARE binding	GO:0000149	molecular function	16	3	0.08599	0.1255	0.01681	0.849	0.0305	0.08287	0.08923	0.07935	0.1985	0.008918	0.03169
1609	545192	BAIAP3	948	syntaxin binding	GO:0019905	molecular function	16	7	0.08599	0.1255	0.01754	0.845	0.02753	0.08287	0.08923	0.07935	0.1985	0.01003	0.03067
1610	545192	BAIAP3	948	retrograde transport, endosome to Golgi	GO:0042147	biological process	16	6	0.0921	0.1291	0.02766	0.7886	0.04269	0.08293	0.1023	0.08621	0.1934	0.01363	0.05613
1611	545192	BAIAP3	948	phospholipid binding	GO:0005543	molecular function	16	13	0.09343	0.133	0.04241	0.7258	0.01675	0.08573	0.1018	0.08703	0.2033	0.03191	0.05635
1612	545192	BAIAP3	948	plasma membrane	GO:0005886	cellular component	16	52	0.1092	0.1408	0.0597	0.6765	0.02093	0.09542	0.125	0.08709	0.2276	0.04242	0.08403
1613	545192	BAIAP3	948	G protein-coupled receptor signaling pathway	GO:0007186	biological process	16	44	0.1134	0.1427	0.06224	0.6699	0.02887	0.09525	0.135	0.08728	0.2333	0.03847	0.1007
1614	545192	BAIAP3	948	dense core granule maturation	GO:1990502	biological process	16	3	0.1186	0.1362	0.05613	0.6815	0.06583	0.07273	0.1936	0.08659	0.2141	0.01966	0.1602
1615	545192	BAIAP3	948	protein binding	GO:0005515	molecular function	16	237	0.1312	0.1423	0.08372	0.6261	0.02047	0.1074	0.1603	0.08692	0.2329	0.06093	0.115
1616	545192	BAIAP3	948	calcium ion binding	GO:0005509	molecular function	16	6	0.1517	0.1442	0.1006	0.594	0.04508	0.102	0.2256	0.08718	0.2386	0.05141	0.1967
1617	545192	BAIAP3	948	recycling endosome membrane	GO:0055038	cellular component	16	2	0.1532	0.1457	0.1002	0.5953	0.04558	0.1032	0.2274	0.08731	0.243	0.0498	0.2017
1618	545192	BAIAP3	948	cytosol	GO:0005829	cellular component	16	32	0.155	0.1503	0.1093	0.5843	0.01731	0.1316	0.1826	0.0985	0.2294	0.08479	0.1408
1619	545192	BAIAP3	948	late endosome membrane	GO:0031902	cellular component	16	4	0.1567	0.1457	0.1017	0.5918	0.05075	0.1032	0.2379	0.08731	0.243	0.04669	0.2215
1620	545192	BAIAP3	948	positive regulation of neurotransmitter secretion	GO:0001956	biological process	16	11	0.1647	0.1457	0.1148	0.5746	0.03304	0.1224	0.2217	0.08731	0.243	0.0702	0.1878
1621	545192	BAIAP3	948	regulation of dense core granule exocytosis	GO:1905413	biological process	16	2	0.169	0.1457	0.1195	0.5681	0.0329	0.1263	0.2262	0.08731	0.243	0.07321	0.195
1622	545192	BAIAP3	948	trans-Golgi network membrane	GO:0032588	cellular component	16	3	0.1831	0.1457	0.1344	0.5476	0.03621	0.1325	0.2529	0.08731	0.243	0.07956	0.227
1623	545192	BAIAP3	948	positive regulation of insulin secretion involved in cellular response to glucose stimulus	GO:0035774	biological process	16	3	0.213	0.1733	0.1596	0.5095	0.06722	0.1163	0.3901	0.08148	0.3685	0.06472	0.3936
1624	619331	ZNF551	25108	DNA-binding transcription factor activity, RNA polymerase II-specific	GO:0000981	molecular function	4	13	0.08599	0.0391	0.01592	0.8674	0.005481	0.08287	0.08923	0.03379	0.04524	0.0143	0.01772
1625	619331	ZNF551	25108	RNA polymerase II cis-regulatory region sequence-specific DNA binding	GO:0000978	molecular function	4	22	0.08599	0.0391	0.02015	0.8338	0.007225	0.08287	0.08923	0.03379	0.04524	0.01796	0.0226
1626	619331	ZNF551	25108	regulation of transcription by RNA polymerase II	GO:0006357	biological process	4	42	0.08659	0.04324	0.03243	0.7639	0.01238	0.08419	0.08907	0.03513	0.05321	0.02635	0.0399
1627	619331	ZNF551	25108	nucleus	GO:0005634	cellular component	4	48	0.1109	0.06278	0.06278	0.6699	0.01474	0.09496	0.1295	0.04939	0.07981	0.04939	0.07981
1628	17380	MME	7154	early endosome	GO:0005769	cellular component	39	4	0.08599	0.0742	0.01106	0.8993	0.01511	0.08287	0.08923	0.06297	0.08743	0.00724	0.01689
1629	17380	MME	7154	amyloid-beta clearance by cellular catabolic process	GO:0150094	biological process	39	3	0.08599	0.0742	0.01431	0.8601	0.04743	0.08287	0.08923	0.06297	0.08743	0.005533	0.03702
1630	17380	MME	7154	amyloid-beta clearance	GO:0097242	biological process	39	4	0.08599	0.0742	0.01686	0.8514	0.02482	0.08287	0.08923	0.06297	0.08743	0.01007	0.02825
1631	17380	MME	7154	protein processing	GO:0016485	biological process	39	17	0.08599	0.0742	0.01857	0.8406	0.02435	0.08287	0.08923	0.06297	0.08743	0.01179	0.02925
1632	17380	MME	7154	cytoplasmic vesicle	GO:0031410	cellular component	39	33	0.08599	0.0742	0.01998	0.835	0.02147	0.08287	0.08923	0.06297	0.08743	0.01417	0.02819
1633	17380	MME	7154	axon	GO:0030424	cellular component	39	12	0.08599	0.0742	0.02035	0.8325	0.01156	0.08287	0.08923	0.06297	0.08743	0.01697	0.02441
1634	17380	MME	7154	membrane raft	GO:0045121	cellular component	39	5	0.08599	0.0742	0.0253	0.8002	0.02508	0.08287	0.08923	0.06297	0.08743	0.01678	0.03815
1635	17380	MME	7154	metalloendopeptidase activity	GO:0004222	molecular function	39	5	0.08599	0.07539	0.02254	0.8169	0.01096	0.08287	0.08923	0.06553	0.08673	0.01894	0.02682
1636	17380	MME	7154	brush border	GO:0005903	cellular component	39	2	0.08599	0.07539	0.02397	0.8078	0.00849	0.08287	0.08923	0.06553	0.08673	0.02097	0.02741
1637	17380	MME	7154	neuropeptide processing	GO:0061837	biological process	39	2	0.08604	0.0742	0.02533	0.7996	0.01933	0.08284	0.08936	0.06297	0.08743	0.01853	0.03464
1638	17380	MME	7154	learning or memory	GO:0007611	biological process	39	6	0.08639	0.0742	0.02318	0.8129	0.02176	0.08258	0.09037	0.06297	0.08743	0.01628	0.03302
1639	17380	MME	7154	neuronal cell body	GO:0043025	cellular component	39	6	0.08672	0.07539	0.02925	0.7786	0.01227	0.08286	0.09077	0.06553	0.08673	0.02379	0.03596
1640	17380	MME	7154	metallopeptidase activity	GO:0008237	molecular function	39	4	0.09043	0.07836	0.03887	0.7379	0.005327	0.08469	0.09656	0.06793	0.09039	0.03554	0.04251
1641	17380	MME	7154	replicative senescence	GO:0090399	biological process	39	2	0.09168	0.0793	0.03331	0.7611	0.03674	0.08022	0.1048	0.06507	0.09664	0.01807	0.06139
1642	17380	MME	7154	phosphatidylserine binding	GO:0001786	molecular function	39	3	0.09249	0.07641	0.04112	0.7305	0.01403	0.08832	0.09685	0.0668	0.08739	0.0323	0.05233
1643	17380	MME	7154	cellular response to UV-A	GO:0071492	biological process	39	3	0.09407	0.08026	0.0404	0.7325	0.02333	0.07811	0.1133	0.06817	0.0945	0.0272	0.05999
1644	17380	MME	7154	cellular response to UV-B	GO:0071493	biological process	39	3	0.09408	0.08026	0.0413	0.7294	0.02166	0.07813	0.1133	0.06817	0.0945	0.0286	0.05963
1645	17380	MME	7154	cardiolipin binding	GO:1901612	molecular function	39	2	0.09588	0.0778	0.04094	0.7305	0.03286	0.0825	0.1114	0.06369	0.09503	0.02355	0.07118
1646	17380	MME	7154	trans-Golgi network	GO:0005802	cellular component	39	4	0.09816	0.08132	0.04796	0.7082	0.0145	0.08604	0.112	0.06818	0.09699	0.03743	0.06145
1647	17380	MME	7154	plasma membrane	GO:0005886	cellular component	39	52	0.09917	0.08132	0.04964	0.7037	0.009034	0.08917	0.1103	0.06818	0.09699	0.04257	0.05789
1648	17380	MME	7154	endopeptidase activity	GO:0004175	molecular function	39	9	0.1036	0.08274	0.05481	0.6898	0.008439	0.09861	0.1089	0.07012	0.09764	0.0477	0.06297
1649	17380	MME	7154	extracellular exosome	GO:0070062	cellular component	39	24	0.1053	0.08465	0.05683	0.6846	0.008195	0.09545	0.1161	0.07675	0.09336	0.04973	0.06495
1650	17380	MME	7154	presynapse	GO:0098793	cellular component	39	4	0.1071	0.08326	0.05552	0.6865	0.03318	0.08786	0.1304	0.06729	0.103	0.032	0.09632
1651	17380	MME	7154	aging	GO:0007568	biological process	39	7	0.1086	0.08885	0.05306	0.6926	0.04493	0.07931	0.1487	0.06676	0.1182	0.0252	0.1117
1652	17380	MME	7154	positive regulation of neurogenesis	GO:0050769	biological process	39	10	0.1112	0.08819	0.06065	0.6732	0.03485	0.08026	0.1541	0.06636	0.1172	0.03444	0.1068
1653	17380	MME	7154	proteolysis	GO:0006508	biological process	39	9	0.1119	0.08798	0.06003	0.6749	0.03463	0.08451	0.1483	0.06725	0.1151	0.03393	0.1062
1654	17380	MME	7154	creatinine metabolic process	GO:0046449	biological process	39	5	0.1131	0.08764	0.04422	0.7168	0.07632	0.07563	0.1693	0.05864	0.131	0.01262	0.1549
1655	17380	MME	7154	zinc ion binding	GO:0008270	molecular function	39	3	0.1143	0.08971	0.06537	0.6631	0.02748	0.08676	0.1504	0.06858	0.1173	0.04214	0.1014
1656	17380	MME	7154	protein homodimerization activity	GO:0042803	molecular function	39	10	0.1184	0.09044	0.07142	0.6508	0.007046	0.1059	0.1324	0.07867	0.104	0.06388	0.07984
1657	17380	MME	7154	focal adhesion	GO:0005925	cellular component	39	6	0.1245	0.09667	0.07712	0.6391	0.009254	0.1168	0.1327	0.09233	0.1012	0.06667	0.0892
1658	17380	MME	7154	exopeptidase activity	GO:0008238	molecular function	39	12	0.13	0.09701	0.08388	0.6261	0.01575	0.1091	0.155	0.07972	0.118	0.06553	0.1074
1659	17380	MME	7154	cytoplasm	GO:0005737	cellular component	39	35	0.1503	0.1164	0.1019	0.5955	0.01878	0.1289	0.1753	0.09884	0.137	0.07639	0.136
1660	17380	MME	7154	protein binding	GO:0005515	molecular function	39	237	0.1571	0.1198	0.1111	0.5824	0.006738	0.1497	0.1649	0.11	0.1305	0.1007	0.1227
1661	17380	MME	7154	cellular response to cytokine stimulus	GO:0071345	biological process	39	31	0.1833	0.141	0.1383	0.5456	0.008615	0.1679	0.2	0.1257	0.1583	0.1226	0.1561
1662	17380	MME	7154	kidney development	GO:0001822	biological process	39	6	0.1923	0.1519	0.1459	0.533	0.03745	0.1309	0.2826	0.09757	0.2365	0.08807	0.2416
1663	11766	AP1G2	556	clathrin adaptor activity	GO:0035615	molecular function	9	4	0.08599	0.0373	0.01097	0.902	0.01065	0.08287	0.08923	0.02746	0.05066	0.007816	0.01539
1664	11766	AP1G2	556	Golgi to vacuole transport	GO:0006896	biological process	9	5	0.08599	0.0373	0.01228	0.893	0.009919	0.08287	0.08923	0.02746	0.05066	0.009151	0.01648
1665	11766	AP1G2	556	cargo adaptor activity	GO:0140312	molecular function	9	3	0.08599	0.0373	0.01231	0.8863	0.02091	0.08287	0.08923	0.02746	0.05066	0.007168	0.02115
1666	11766	AP1G2	556	receptor-mediated endocytosis	GO:0006898	biological process	9	9	0.08599	0.04261	0.01722	0.8556	0.01504	0.08287	0.08923	0.03493	0.05198	0.01338	0.02216
1667	11766	AP1G2	556	Golgi-associated vesicle	GO:0005798	cellular component	9	4	0.08668	0.04946	0.03097	0.7702	0.007951	0.08236	0.09122	0.03621	0.06757	0.02706	0.03544
1668	11766	AP1G2	556	transport vesicle	GO:0030133	cellular component	9	10	0.09209	0.05195	0.04141	0.7293	0.01053	0.08145	0.1041	0.03523	0.07662	0.03445	0.04977
1669	11766	AP1G2	556	protein binding	GO:0005515	molecular function	9	237	0.09644	0.05347	0.04429	0.7198	0.02264	0.08247	0.1128	0.03601	0.07939	0.03014	0.06507
1670	11766	AP1G2	556	membrane	GO:0016020	cellular component	9	35	0.09863	0.05289	0.04627	0.7129	0.0305	0.07575	0.1284	0.03481	0.08035	0.02782	0.07694
1671	11766	AP1G2	556	AP-1 adaptor complex	GO:0030121	cellular component	9	2	0.1109	0.06108	0.05955	0.6763	0.03338	0.085	0.1447	0.03686	0.1012	0.03419	0.1037
1672	229357	GPR149	23627	peptide binding	GO:0042277	molecular function	6	14	0.08599	0.03009	0.01307	0.8862	0.01335	0.08287	0.08923	0.02352	0.0385	0.009465	0.01805
1673	229357	GPR149	23627	neuropeptide signaling pathway	GO:0007218	biological process	6	6	0.08599	0.03009	0.01629	0.8635	0.01185	0.08287	0.08923	0.02352	0.0385	0.01313	0.0202
1674	229357	GPR149	23627	integral component of plasma membrane	GO:0005887	cellular component	6	31	0.08599	0.03009	0.02024	0.8328	0.01754	0.08287	0.08923	0.02352	0.0385	0.01521	0.02694
1675	229357	GPR149	23627	neuron projection	GO:0043005	cellular component	6	27	0.08604	0.0305	0.02474	0.8032	0.01389	0.08284	0.08936	0.02372	0.03923	0.01991	0.03074
1676	229357	GPR149	23627	neuropeptide binding	GO:0042923	molecular function	6	5	0.08606	0.03009	0.02084	0.8289	0.02318	0.08305	0.08918	0.02352	0.0385	0.01432	0.03033
1677	229357	GPR149	23627	G protein-coupled receptor activity	GO:0004930	molecular function	6	50	0.1012	0.05113	0.05113	0.6991	0.02002	0.08621	0.1189	0.03653	0.07156	0.03653	0.07156
1678	140743	REM2	20248	plasma membrane	GO:0005886	cellular component	4	52	0.2264	0.2907	0.1838	0.4934	0.02163	0.1804	0.2841	0.2124	0.3978	0.1389	0.2433
1679	140743	REM2	20248	calcium channel regulator activity	GO:0005246	molecular function	4	3	0.2518	0.2907	0.2107	0.4656	0.03422	0.1811	0.3502	0.2124	0.3978	0.1408	0.3154
1680	140743	REM2	20248	GTP binding	GO:0005525	molecular function	4	5	0.2533	0.2907	0.213	0.4651	0.02263	0.2013	0.3187	0.2124	0.3978	0.1613	0.2814
1681	140743	REM2	20248	protein binding	GO:0005515	molecular function	4	237	0.3433	0.3111	0.3111	0.3855	0.01981	0.2851	0.4133	0.2527	0.3829	0.2527	0.3829
1682	22317	VAMP1	12642	syntaxin binding	GO:0019905	molecular function	11	7	0.08599	0.03016	0.008762	0.9176	0.007733	0.08287	0.08923	0.025	0.03638	0.006141	0.0125
1683	22317	VAMP1	12642	SNARE complex assembly	GO:0035493	biological process	11	2	0.08599	0.03016	0.008347	0.9078	0.02374	0.08287	0.08923	0.025	0.03638	0.00344	0.02025
1684	22317	VAMP1	12642	specific granule membrane	GO:0035579	cellular component	11	2	0.08599	0.03158	0.02227	0.8178	0.02371	0.08287	0.08923	0.02669	0.03736	0.01506	0.03293
1685	22317	VAMP1	12642	tertiary granule membrane	GO:0070821	cellular component	11	2	0.08599	0.03158	0.02234	0.8173	0.0236	0.08287	0.08923	0.02669	0.03736	0.01516	0.03294
1686	22317	VAMP1	12642	plasma membrane	GO:0005886	cellular component	11	52	0.08599	0.03362	0.02023	0.8316	0.0199	0.08287	0.08923	0.03096	0.03651	0.01447	0.02828
1687	22317	VAMP1	12642	SNAP receptor activity	GO:0005484	molecular function	11	3	0.0863	0.03158	0.01833	0.8405	0.03134	0.08265	0.09012	0.02669	0.03736	0.01005	0.03344
1688	22317	VAMP1	12642	protein binding	GO:0005515	molecular function	11	237	0.0863	0.03481	0.0291	0.7794	0.01594	0.08265	0.09012	0.03186	0.03805	0.02235	0.0379
1689	22317	VAMP1	12642	SNARE complex	GO:0031201	cellular component	11	21	0.08853	0.0383	0.03388	0.7577	0.0168	0.08573	0.09142	0.02997	0.04895	0.0255	0.04503
1690	22317	VAMP1	12642	vesicle fusion	GO:0006906	biological process	11	21	0.09421	0.04033	0.03605	0.7491	0.03417	0.08217	0.108	0.02604	0.06247	0.0203	0.06402
1691	192657	ELL2	17064	nucleoplasm	GO:0005654	cellular component	6	26	0.08695	0.07572	0.03049	0.7728	0.0185	0.0831	0.09097	0.06913	0.08293	0.02244	0.04143
1692	192657	ELL2	17064	protein binding	GO:0005515	molecular function	6	237	0.08897	0.07572	0.03395	0.7571	0.01196	0.08198	0.09655	0.06913	0.08293	0.02771	0.0416
1693	192657	ELL2	17064	transcription elongation factor complex	GO:0008023	cellular component	6	10	0.1569	0.1348	0.1116	0.5814	0.01012	0.1412	0.1744	0.1085	0.1674	0.09599	0.1297
1694	192657	ELL2	17064	snRNA transcription by RNA polymerase II	GO:0042795	biological process	6	3	0.1811	0.1415	0.1286	0.5514	0.05492	0.1104	0.297	0.07689	0.2604	0.05988	0.276
1695	545902	PTPRH	9672	protein tyrosine phosphatase activity	GO:0004725	molecular function	7	9	0.08599	0.03515	0.01454	0.8752	0.01492	0.08287	0.08923	0.03215	0.03842	0.01077	0.01963
1696	545902	PTPRH	9672	protein dephosphorylation	GO:0006470	biological process	7	12	0.08599	0.03515	0.01894	0.8434	0.003881	0.08287	0.08923	0.03215	0.03842	0.01767	0.0203
1697	545902	PTPRH	9672	cadherin binding	GO:0045296	molecular function	7	6	0.08954	0.04045	0.03687	0.7455	0.01534	0.0871	0.09206	0.03157	0.05182	0.02834	0.04798
1698	545902	PTPRH	9672	protein binding	GO:0005515	molecular function	7	237	0.09192	0.04045	0.04045	0.7327	0.01439	0.08722	0.09688	0.03157	0.05182	0.03157	0.05182
1699	50708	H1-2	4716	RNA binding	GO:0003723	molecular function	18	43	0.08599	0.03213	0.007869	0.9043	0.02607	0.08287	0.08923	0.02361	0.04372	0.002256	0.02746
1700	50708	H1-2	4716	chromatin DNA binding	GO:0031490	molecular function	18	5	0.08599	0.03351	0.005038	0.9407	0.007209	0.08287	0.08923	0.02631	0.04267	0.002995	0.008476
1701	50708	H1-2	4716	euchromatin	GO:0000791	cellular component	18	3	0.08599	0.03351	0.01074	0.906	0.004421	0.08287	0.08923	0.02631	0.04267	0.009271	0.01244
1702	50708	H1-2	4716	nucleosomal DNA binding	GO:0031492	molecular function	18	3	0.08599	0.03351	0.01501	0.8731	0.0101	0.08287	0.08923	0.02631	0.04267	0.01226	0.01838
1703	50708	H1-2	4716	double-stranded DNA binding	GO:0003690	molecular function	18	11	0.08599	0.03351	0.02036	0.8326	0.01178	0.08287	0.08923	0.02631	0.04267	0.01693	0.02448
1704	50708	H1-2	4716	nucleus	GO:0005634	cellular component	18	48	0.08599	0.03363	0.01937	0.8381	0.01696	0.08287	0.08923	0.02644	0.04276	0.01451	0.02588
1705	50708	H1-2	4716	negative regulation of chromatin silencing	GO:0031936	biological process	18	7	0.0863	0.03351	0.01846	0.8438	0.02864	0.08265	0.09012	0.02631	0.04267	0.01131	0.03015
1706	50708	H1-2	4716	nucleosome positioning	GO:0016584	biological process	18	3	0.08644	0.03681	0.03107	0.7698	0.0009979	0.08276	0.09029	0.03206	0.04227	0.03052	0.03163
1707	50708	H1-2	4716	protein binding	GO:0005515	molecular function	18	237	0.09042	0.03593	0.02928	0.78	0.02927	0.07923	0.1032	0.02494	0.05177	0.018	0.04762
1708	50708	H1-2	4716	negative regulation of DNA recombination	GO:0045910	biological process	18	14	0.09247	0.03961	0.03484	0.7535	0.02886	0.07757	0.1102	0.02769	0.05664	0.02138	0.05676
1709	50708	H1-2	4716	chromosome condensation	GO:0030261	biological process	18	5	0.09353	0.04425	0.0422	0.7268	0.009301	0.08522	0.1027	0.03573	0.05479	0.03591	0.0496
1710	17996	NEB	7720	muscle fiber development	GO:0048747	biological process	9	4	0.08599	0.0147	0.003478	0.9466	0.01399	0.08287	0.08923	0.007187	0.03007	0.001077	0.01123
1711	17996	NEB	7720	cardiac muscle thin filament assembly	GO:0071691	biological process	9	2	0.08599	0.01919	0.007858	0.9172	0.01738	0.08287	0.08923	0.01503	0.02448	0.004134	0.01494
1712	17996	NEB	7720	Z disc	GO:0030018	cellular component	9	3	0.08599	0.02807	0.01692	0.8568	0.01495	0.08287	0.08923	0.0216	0.03649	0.01268	0.02257
1713	17996	NEB	7720	actin filament binding	GO:0051015	molecular function	9	5	0.08599	0.02807	0.0181	0.8485	0.01835	0.08287	0.08923	0.0216	0.03649	0.01338	0.02448
1714	17996	NEB	7720	protein binding	GO:0005515	molecular function	9	237	0.08599	0.02973	0.02443	0.8059	0.02108	0.08287	0.08923	0.02145	0.04121	0.01733	0.03444
1715	17996	NEB	7720	extracellular exosome	GO:0070062	cellular component	9	24	0.08768	0.03294	0.03294	0.7615	0.01473	0.08337	0.09222	0.02563	0.04234	0.02563	0.04234
1716	224109	NRROS	24613	immune response	GO:0006955	biological process	3	14	0.09996	0.08878	0.04954	0.7044	0.006245	0.09606	0.104	0.06644	0.1187	0.0447	0.05491
1717	224109	NRROS	24613	cell surface	GO:0009986	cellular component	3	7	0.1245	0.08878	0.07756	0.6382	0.0069	0.1141	0.1359	0.06644	0.1187	0.06954	0.0865
1718	224109	NRROS	24613	transforming growth factor beta binding	GO:0050431	molecular function	3	3	0.1552	0.1176	0.1025	0.5849	0.07077	0.07771	0.3099	0.05144	0.2689	0.03803	0.2765
1719	64074	SMOC2	20323	positive regulation of endothelial cell chemotaxis	GO:2001028	biological process	15	6	0.1109	0.2709	0.05543	0.6858	0.04426	0.07958	0.1545	0.1385	0.53	0.02694	0.1141
1720	64074	SMOC2	20323	positive regulation of endothelial cell migration	GO:0010595	biological process	15	6	0.1225	0.2709	0.07124	0.6494	0.03438	0.08899	0.1685	0.1385	0.53	0.04155	0.1222
1721	64074	SMOC2	20323	positive regulation of vascular wound healing	GO:0035470	biological process	15	4	0.129	0.2743	0.07907	0.6344	0.02607	0.1	0.1662	0.1435	0.5245	0.05264	0.1188
1722	64074	SMOC2	20323	positive regulation of angiogenesis	GO:0045766	biological process	15	7	0.1485	0.3416	0.102	0.5946	0.02469	0.1138	0.194	0.2365	0.4933	0.07069	0.1473
1723	64074	SMOC2	20323	basement membrane	GO:0005604	cellular component	15	2	0.152	0.3143	0.08699	0.6127	0.07313	0.0889	0.2598	0.1436	0.6875	0.02735	0.2767
1724	64074	SMOC2	20323	extracellular matrix organization	GO:0030198	biological process	15	15	0.2324	0.3618	0.1747	0.4883	0.07949	0.1124	0.4806	0.1442	0.908	0.05859	0.5209
1725	64074	SMOC2	20323	positive regulation of DNA biosynthetic process	GO:2000573	biological process	15	11	0.2528	0.4264	0.2128	0.4655	0.02109	0.2035	0.3141	0.3106	0.5855	0.164	0.276
1726	64074	SMOC2	20323	cell periphery	GO:0071944	cellular component	15	2	0.2686	0.3827	0.2058	0.4431	0.1081	0.1039	0.6942	0.1417	1.034	0.05416	0.7817
1727	64074	SMOC2	20323	extracellular space	GO:0005615	cellular component	15	17	0.2863	0.4134	0.2386	0.4221	0.09038	0.1316	0.623	0.1975	0.8655	0.09121	0.624
1728	64074	SMOC2	20323	heparin binding	GO:0008201	molecular function	15	6	0.2915	0.3978	0.2277	0.4221	0.1078	0.1117	0.7609	0.1439	1.1	0.05812	0.892
1729	64074	SMOC2	20323	protein binding	GO:0005515	molecular function	15	237	0.4349	0.505	0.4056	0.3072	0.06972	0.2589	0.7307	0.3106	0.8211	0.227	0.7249
1730	64074	SMOC2	20323	positive regulation of fibroblast growth factor receptor signaling pathway	GO:0045743	biological process	15	5	0.4592	0.5327	0.4335	0.2991	0.04409	0.3224	0.6541	0.3241	0.8754	0.2868	0.6553
1731	64074	SMOC2	20323	positive regulation of vascular endothelial growth factor signaling pathway	GO:1900748	biological process	15	3	0.464	0.5327	0.4319	0.2905	0.06908	0.2671	0.806	0.3241	0.8754	0.2246	0.8304
1732	64074	SMOC2	20323	positive regulation of mitotic cell cycle	GO:0045931	biological process	15	10	0.569	0.605	0.5526	0.2324	0.02897	0.4673	0.6928	0.4615	0.7932	0.4476	0.6823
1733	64074	SMOC2	20323	extracellular matrix binding	GO:0050840	molecular function	15	5	0.5836	0.5785	0.5653	0.2123	0.06252	0.3881	0.8773	0.3839	0.8718	0.3602	0.8873
1734	68024	H2BC10	4756	identical protein binding	GO:0042802	molecular function	22	14	0.08599	0.02775	0.009078	0.9091	0.01662	0.08287	0.08923	0.02465	0.03123	0.004615	0.01786
1735	68024	H2BC10	4756	DNA binding	GO:0003677	molecular function	22	24	0.08599	0.02775	0.01086	0.9005	0.01298	0.08287	0.08923	0.02465	0.03123	0.006867	0.01716
1736	68024	H2BC10	4756	innate immune response in mucosa	GO:0002227	biological process	22	3	0.08599	0.02775	0.01109	0.8953	0.02043	0.08287	0.08923	0.02465	0.03123	0.006499	0.01893
1737	68024	H2BC10	4756	antimicrobial humoral immune response mediated by antimicrobial peptide	GO:0061844	biological process	22	2	0.08599	0.02775	0.01203	0.8922	0.01511	0.08287	0.08923	0.02465	0.03123	0.00795	0.0182
1738	68024	H2BC10	4756	nucleosome assembly	GO:0006334	biological process	22	9	0.08599	0.02775	0.01307	0.884	0.01578	0.08287	0.08923	0.02465	0.03123	0.008608	0.01986
1739	68024	H2BC10	4756	defense response to Gram-positive bacterium	GO:0050830	biological process	22	3	0.08599	0.02775	0.01423	0.8802	0.007268	0.08287	0.08923	0.02465	0.03123	0.01204	0.01682
1740	68024	H2BC10	4756	antibacterial humoral response	GO:0019731	biological process	22	6	0.08599	0.02775	0.0161	0.8638	0.01491	0.08287	0.08923	0.02465	0.03123	0.01217	0.0213
1741	68024	H2BC10	4756	extracellular exosome	GO:0070062	cellular component	22	24	0.08599	0.02802	0.01886	0.8438	0.005269	0.08287	0.08923	0.0248	0.03165	0.01722	0.02065
1742	68024	H2BC10	4756	nucleus	GO:0005634	cellular component	22	48	0.08599	0.02802	0.02007	0.8344	0.01366	0.08287	0.08923	0.0248	0.03165	0.01611	0.025
1743	68024	H2BC10	4756	nucleoplasm	GO:0005654	cellular component	22	26	0.08599	0.02802	0.02394	0.8081	0.0158	0.08287	0.08923	0.0248	0.03165	0.01854	0.0309
1744	68024	H2BC10	4756	cytosol	GO:0005829	cellular component	22	32	0.08599	0.02802	0.02641	0.7932	0.009885	0.08287	0.08923	0.0248	0.03165	0.02244	0.03108
1745	68024	H2BC10	4756	extracellular space	GO:0005615	cellular component	22	17	0.08604	0.02945	0.02865	0.7811	0.001633	0.08284	0.08936	0.02838	0.03055	0.02789	0.02944
1746	68024	H2BC10	4756	protein binding	GO:0005515	molecular function	22	237	0.08615	0.02802	0.0256	0.7976	0.008171	0.08276	0.08968	0.0248	0.03165	0.02242	0.02923
1747	235582	GLYCTK	24247	protein phosphorylation	GO:0006468	biological process	6	28	0.1488	0.2783	0.1013	0.5968	0.01336	0.1346	0.1644	0.2121	0.3651	0.08253	0.1243
1748	235582	GLYCTK	24247	Golgi apparatus	GO:0005794	cellular component	6	12	0.1949	0.2783	0.1502	0.5313	0.01135	0.1707	0.2225	0.2121	0.3651	0.1284	0.1758
1749	235582	GLYCTK	24247	glycerate kinase activity	GO:0008887	molecular function	6	3	0.2581	0.2783	0.2181	0.461	0.01443	0.2202	0.3024	0.2121	0.3651	0.1827	0.2604
1750	235582	GLYCTK	24247	cytosol	GO:0005829	cellular component	6	32	0.2655	0.2783	0.226	0.4543	0.007427	0.2437	0.2892	0.2121	0.3651	0.2066	0.2472
1751	235582	GLYCTK	24247	protein binding	GO:0005515	molecular function	6	237	0.2891	0.2794	0.2516	0.4314	0.02071	0.2353	0.3553	0.2113	0.3695	0.1981	0.3196
1752	235582	GLYCTK	24247	cytoplasm	GO:0005737	cellular component	6	35	0.2991	0.2794	0.2613	0.4219	0.03159	0.2264	0.3951	0.2113	0.3695	0.1846	0.3697
1753	269275	ACVR1C	18123	nodal signaling pathway	GO:0038092	biological process	19	3	0.08599	0.1717	0.02061	0.8306	0.009688	0.08287	0.08923	0.139	0.2122	0.01765	0.02407
1754	269275	ACVR1C	18123	activin receptor signaling pathway	GO:0032924	biological process	19	4	0.09048	0.172	0.03077	0.7728	0.0285	0.07938	0.1031	0.1392	0.2126	0.0192	0.04931
1755	269275	ACVR1C	18123	plasma membrane	GO:0005886	cellular component	19	52	0.09568	0.1851	0.04232	0.7264	0.02405	0.0887	0.1032	0.1687	0.2031	0.02808	0.06377
1756	269275	ACVR1C	18123	apoptotic nuclear changes	GO:0030262	biological process	19	2	0.101	0.1854	0.05067	0.7006	0.0161	0.0942	0.1082	0.1693	0.2031	0.03858	0.06656
1757	269275	ACVR1C	18123	receptor complex	GO:0043235	cellular component	19	20	0.1017	0.1851	0.04373	0.7221	0.04532	0.08692	0.119	0.1687	0.2031	0.02065	0.09259
1758	269275	ACVR1C	18123	nodal binding	GO:0038100	molecular function	19	2	0.1098	0.187	0.04933	0.7035	0.05093	0.08307	0.1452	0.1314	0.2661	0.02131	0.1142
1759	269275	ACVR1C	18123	growth factor binding	GO:0019838	molecular function	19	22	0.1706	0.2477	0.1163	0.5666	0.06243	0.09342	0.3115	0.177	0.3465	0.04537	0.2983
1760	269275	ACVR1C	18123	nervous system development	GO:0007399	biological process	19	3	0.1716	0.2285	0.1216	0.5649	0.03466	0.1259	0.2339	0.1742	0.2997	0.07276	0.2033
1761	269275	ACVR1C	18123	activin receptor activity, type I	GO:0016361	molecular function	19	2	0.1749	0.2283	0.1287	0.5554	0.03363	0.1248	0.2451	0.1684	0.3095	0.08126	0.2038
1762	269275	ACVR1C	18123	cellular response to growth factor stimulus	GO:0071363	biological process	19	12	0.181	0.2283	0.1325	0.5464	0.05325	0.1062	0.3088	0.1684	0.3095	0.06506	0.2699
1763	269275	ACVR1C	18123	activin receptor complex	GO:0048179	cellular component	19	3	0.2013	0.2594	0.1573	0.5231	0.009811	0.1844	0.2198	0.203	0.3316	0.1377	0.1797
1764	269275	ACVR1C	18123	protein phosphorylation	GO:0006468	biological process	19	28	0.2175	0.2594	0.1746	0.504	0.009219	0.1954	0.2422	0.203	0.3316	0.1549	0.1968
1765	269275	ACVR1C	18123	positive regulation of apoptotic process	GO:0043065	biological process	19	24	0.2176	0.2605	0.1679	0.4962	0.07925	0.1014	0.4669	0.165	0.4111	0.0599	0.4704
1766	269275	ACVR1C	18123	trophectodermal cell proliferation	GO:0001834	biological process	19	2	0.2238	0.2512	0.1802	0.4947	0.03673	0.1535	0.3261	0.1773	0.3558	0.111	0.2927
1767	269275	ACVR1C	18123	negative regulation of chorionic trophoblast cell proliferation	GO:1901383	biological process	19	3	0.2243	0.2487	0.1798	0.4949	0.03925	0.1494	0.3368	0.1771	0.3493	0.1066	0.303
1768	269275	ACVR1C	18123	positive regulation of cysteine-type endopeptidase activity involved in apoptotic process	GO:0043280	biological process	19	6	0.2316	0.2487	0.1873	0.487	0.03969	0.1542	0.3479	0.1771	0.3493	0.1113	0.3151
1769	269275	ACVR1C	18123	cell differentiation	GO:0030154	biological process	19	84	0.2467	0.2628	0.2057	0.473	0.006421	0.2312	0.2633	0.2109	0.3275	0.1902	0.2225
1770	269275	ACVR1C	18123	protein serine/threonine kinase activity	GO:0004674	molecular function	19	28	0.338	0.341	0.3023	0.3847	0.05493	0.2041	0.56	0.2018	0.5762	0.1652	0.5532
1771	269275	ACVR1C	18123	negative regulation of trophoblast cell migration	GO:1901164	biological process	19	5	0.5815	0.5632	0.5632	0.1991	0.08463	0.3528	0.9586	0.3304	0.96	0.3304	0.96
1772	12374	CASR	1514	calcium ion import	GO:0070509	biological process	14	5	0.08599	0.03991	0.01543	0.871	0.007192	0.08287	0.08923	0.0374	0.04259	0.01331	0.01789
1773	12374	CASR	1514	detection of calcium ion	GO:0005513	biological process	14	3	0.08599	0.03991	0.01916	0.8412	0.01263	0.08287	0.08923	0.0374	0.04259	0.01555	0.02359
1774	12374	CASR	1514	integral component of plasma membrane	GO:0005887	cellular component	14	31	0.08599	0.03991	0.01946	0.8368	0.02298	0.08287	0.08923	0.0374	0.04259	0.01307	0.02896
1775	12374	CASR	1514	cellular calcium ion homeostasis	GO:0006874	biological process	14	12	0.08599	0.03991	0.02079	0.8287	0.01301	0.08287	0.08923	0.0374	0.04259	0.0169	0.02558
1776	12374	CASR	1514	G protein-coupled receptor signaling pathway	GO:0007186	biological process	14	44	0.08599	0.03991	0.02287	0.8148	0.007418	0.08287	0.08923	0.0374	0.04259	0.02036	0.02569
1777	12374	CASR	1514	amino acid binding	GO:0016597	molecular function	14	13	0.08599	0.03991	0.02497	0.8014	0.008029	0.08287	0.08923	0.0374	0.04259	0.02195	0.0284
1778	12374	CASR	1514	calcium ion binding	GO:0005509	molecular function	14	6	0.08616	0.04056	0.02864	0.7815	0.01161	0.0833	0.08912	0.03691	0.04456	0.02359	0.03478
1779	12374	CASR	1514	protein homodimerization activity	GO:0042803	molecular function	14	10	0.08858	0.04416	0.03447	0.7551	0.009266	0.0857	0.09156	0.03784	0.05154	0.0295	0.04029
1780	12374	CASR	1514	regulation of calcium ion transport	GO:0051924	biological process	14	8	0.09013	0.04471	0.03167	0.7674	0.02184	0.07947	0.1022	0.03559	0.05616	0.02184	0.04592
1781	12374	CASR	1514	protein binding	GO:0005515	molecular function	14	237	0.09978	0.05591	0.05083	0.7003	0.0107	0.09026	0.1103	0.04664	0.06702	0.0424	0.06093
1782	12374	CASR	1514	G protein-coupled receptor activity	GO:0004930	molecular function	14	50	0.1239	0.07673	0.07673	0.6395	0.01635	0.1048	0.1465	0.05908	0.09966	0.05908	0.09966
1783	20607	SSTR3	11332	peptide binding	GO:0042277	molecular function	8	14	0.08599	0.04163	0.01696	0.8572	0.01607	0.08287	0.08923	0.03103	0.05586	0.01287	0.02236
1784	20607	SSTR3	11332	neuropeptide signaling pathway	GO:0007218	biological process	8	6	0.08599	0.04163	0.02012	0.8338	0.01368	0.08287	0.08923	0.03103	0.05586	0.01616	0.02505
1785	20607	SSTR3	11332	integral component of plasma membrane	GO:0005887	cellular component	8	31	0.08599	0.04163	0.02223	0.8191	0.02155	0.08287	0.08923	0.03103	0.05586	0.01568	0.03151
1786	20607	SSTR3	11332	neuropeptide binding	GO:0042923	molecular function	8	5	0.08666	0.04163	0.02497	0.8025	0.02208	0.08449	0.08889	0.03103	0.05586	0.01741	0.03581
1787	20607	SSTR3	11332	cilium	GO:0005929	cellular component	8	8	0.08752	0.04169	0.02831	0.7839	0.02142	0.08575	0.08933	0.03105	0.05597	0.01998	0.0401
1788	20607	SSTR3	11332	neuron projection	GO:0043005	cellular component	8	27	0.08817	0.04296	0.03144	0.7683	0.01767	0.08312	0.09352	0.03131	0.05895	0.02346	0.04214
1789	20607	SSTR3	11332	G protein-coupled receptor activity	GO:0004930	molecular function	8	50	0.1137	0.07303	0.0639	0.6665	0.02445	0.09166	0.1411	0.04902	0.1088	0.04289	0.0952
1790	20607	SSTR3	11332	protein binding	GO:0005515	molecular function	8	237	0.1366	0.08885	0.08885	0.6171	0.01439	0.1189	0.1568	0.07122	0.1108	0.07122	0.1108
1791	114142	FOXP2	13875	DNA-binding transcription factor activity, RNA polymerase II-specific	GO:0000981	molecular function	16	13	0.08599	0.0474	0.01061	0.9053	0.009028	0.08287	0.08923	0.04078	0.05508	0.007966	0.01414
1792	114142	FOXP2	13875	sequence-specific DNA binding	GO:0043565	molecular function	16	7	0.08599	0.0474	0.009962	0.8998	0.02255	0.08287	0.08923	0.04078	0.05508	0.005001	0.01984
1793	114142	FOXP2	13875	DNA-binding transcription repressor activity, RNA polymerase II-specific	GO:0001227	molecular function	16	4	0.08599	0.0474	0.0149	0.8717	0.01448	0.08287	0.08923	0.04078	0.05508	0.0108	0.02054
1794	114142	FOXP2	13875	negative regulation of transcription by RNA polymerase II	GO:0000122	biological process	16	29	0.08599	0.0474	0.01625	0.853	0.02986	0.08287	0.08923	0.04078	0.05508	0.008602	0.03069
1795	114142	FOXP2	13875	DNA binding	GO:0003677	molecular function	16	24	0.08599	0.04872	0.02313	0.813	0.0068	0.08287	0.08923	0.04304	0.05514	0.02081	0.02572
1796	114142	FOXP2	13875	RNA polymerase II cis-regulatory region sequence-specific DNA binding	GO:0000978	molecular function	16	22	0.08599	0.04872	0.02411	0.8072	0.01153	0.08287	0.08923	0.04304	0.05514	0.02016	0.02884
1797	114142	FOXP2	13875	cerebral cortex development	GO:0021987	biological process	16	2	0.08599	0.04872	0.02529	0.8002	0.01489	0.08287	0.08923	0.04304	0.05514	0.01987	0.03218
1798	114142	FOXP2	13875	regulation of transcription by RNA polymerase II	GO:0006357	biological process	16	42	0.08599	0.04872	0.0283	0.783	0.008111	0.08287	0.08923	0.04304	0.05514	0.02469	0.03245
1799	114142	FOXP2	13875	DNA-binding transcription factor activity	GO:0003700	molecular function	16	10	0.08604	0.04872	0.02493	0.8018	0.009629	0.08284	0.08936	0.04304	0.05514	0.02142	0.02901
1800	114142	FOXP2	13875	negative regulation of transcription, DNA-templated	GO:0045892	biological process	16	27	0.08616	0.04872	0.02972	0.7766	0.01759	0.0833	0.08912	0.04304	0.05514	0.02225	0.03971
1801	114142	FOXP2	13875	identical protein binding	GO:0042802	molecular function	16	14	0.08666	0.04872	0.03353	0.759	0.007252	0.08306	0.09041	0.04304	0.05514	0.02969	0.03787
1802	114142	FOXP2	13875	putamen development	GO:0021758	biological process	16	2	0.09822	0.0557	0.04715	0.7103	0.02065	0.08667	0.1113	0.04262	0.0728	0.03327	0.06682
1803	114142	FOXP2	13875	caudate nucleus development	GO:0021757	biological process	16	2	0.09885	0.0557	0.04803	0.708	0.01893	0.0885	0.1104	0.04262	0.0728	0.03486	0.06617
1804	114142	FOXP2	13875	protein homodimerization activity	GO:0042803	molecular function	16	10	0.1024	0.05919	0.05256	0.6952	0.0169	0.09628	0.109	0.0448	0.0782	0.03946	0.07002
1805	114142	FOXP2	13875	nucleus	GO:0005634	cellular component	16	48	0.1025	0.06082	0.05289	0.6946	0.008767	0.1021	0.1029	0.04848	0.0763	0.04574	0.06116
1806	114142	FOXP2	13875	protein binding	GO:0005515	molecular function	16	237	0.1215	0.07356	0.07356	0.6459	0.01433	0.1118	0.1321	0.05841	0.09264	0.05841	0.09264
1807	12815	COL11A2	2187	extracellular matrix structural constituent conferring tensile strength	GO:0030020	molecular function	14	2	0.08599	0.1313	0.02056	0.831	0.0128	0.08287	0.08923	0.104	0.1659	0.0168	0.02516
1808	12815	COL11A2	2187	collagen fibril organization	GO:0030199	biological process	14	4	0.09201	0.1313	0.03033	0.7746	0.03667	0.08301	0.102	0.104	0.1659	0.01647	0.05585
1809	12815	COL11A2	2187	collagen-containing extracellular matrix	GO:0062023	cellular component	14	14	0.09585	0.1313	0.0446	0.7187	0.01463	0.08607	0.1067	0.104	0.1659	0.03476	0.05721
1810	12815	COL11A2	2187	soft palate development	GO:0060023	biological process	14	2	0.1026	0.1313	0.05034	0.7011	0.02671	0.08327	0.1265	0.104	0.1659	0.03214	0.07887
1811	12815	COL11A2	2187	extracellular matrix structural constituent	GO:0005201	molecular function	14	9	0.1065	0.1313	0.05653	0.6844	0.02128	0.08844	0.1283	0.104	0.1659	0.03968	0.08053
1812	12815	COL11A2	2187	extracellular matrix organization	GO:0030198	biological process	14	15	0.1102	0.1313	0.06017	0.6761	0.01572	0.09968	0.1219	0.104	0.1659	0.04666	0.0776
1813	12815	COL11A2	2187	roof of mouth development	GO:0060021	biological process	14	5	0.1187	0.1313	0.06995	0.6533	0.02401	0.0938	0.1502	0.104	0.1659	0.0476	0.1028
1814	12815	COL11A2	2187	extracellular matrix	GO:0031012	cellular component	14	14	0.1245	0.1361	0.07618	0.6402	0.02181	0.1009	0.1537	0.1025	0.1807	0.05365	0.1082
1815	12815	COL11A2	2187	skeletal system development	GO:0001501	biological process	14	3	0.1621	0.1678	0.1157	0.5757	0.008654	0.1509	0.1742	0.1419	0.1983	0.1018	0.1315
1816	12815	COL11A2	2187	sensory perception of sound	GO:0007605	biological process	14	5	0.1822	0.1901	0.1368	0.5474	0.01221	0.16	0.2074	0.1753	0.206	0.1152	0.1625
1817	12815	COL11A2	2187	cartilage development	GO:0051216	biological process	14	7	0.1834	0.1822	0.1369	0.5455	0.02891	0.1405	0.2393	0.1428	0.2326	0.09028	0.2076
1818	12815	COL11A2	2187	extracellular space	GO:0005615	cellular component	14	17	0.26	0.2517	0.2187	0.4574	0.0383	0.1819	0.3716	0.173	0.3662	0.1405	0.3403
1819	12815	COL11A2	2187	collagen trimer	GO:0005581	cellular component	14	12	0.2756	0.2613	0.2362	0.4448	0.0174	0.2386	0.3183	0.2147	0.3181	0.1928	0.2895
1820	12815	COL11A2	2187	protein binding	GO:0005515	molecular function	14	237	0.3947	0.368	0.368	0.3461	0.01591	0.3424	0.4551	0.3146	0.4304	0.3146	0.4304
1821	19216	PTGER1	9593	plasma membrane	GO:0005886	cellular component	5	52	0.2161	0.4024	0.1721	0.5037	0.03629	0.1497	0.312	0.2847	0.5687	0.1076	0.2753
1822	19216	PTGER1	9593	adenylate cyclase-activating G protein-coupled receptor signaling pathway	GO:0007189	biological process	5	9	0.2898	0.4024	0.2524	0.4311	0.01755	0.2422	0.3468	0.2847	0.5687	0.2056	0.3099
1823	19216	PTGER1	9593	prostaglandin E receptor activity	GO:0004957	molecular function	5	2	0.3627	0.4024	0.3314	0.3698	0.02805	0.2853	0.461	0.2847	0.5687	0.2496	0.44
1824	19216	PTGER1	9593	positive regulation of cytosolic calcium ion concentration	GO:0007204	biological process	5	10	0.3838	0.4378	0.3532	0.35	0.04789	0.2496	0.5902	0.3163	0.606	0.2138	0.5834
1825	19216	PTGER1	9593	inflammatory response	GO:0006954	biological process	5	7	0.4036	0.4029	0.3741	0.3364	0.04647	0.2786	0.5846	0.2843	0.571	0.2448	0.5715
1826	26903	DYSF	3097	plasma membrane repair	GO:0001778	biological process	26	2	0.08599	0.02147	0.001965	0.9581	0.01394	0.08287	0.08923	0.01106	0.04167	0.0004593	0.008412
1827	26903	DYSF	3097	late endosome	GO:0005770	cellular component	26	4	0.08599	0.0266	0.00374	0.9474	0.01131	0.08287	0.08923	0.01561	0.04532	0.001522	0.009189
1828	26903	DYSF	3097	sarcolemma	GO:0042383	cellular component	26	3	0.08599	0.02835	0.005617	0.9244	0.02419	0.08287	0.08923	0.01493	0.05383	0.001819	0.01735
1829	26903	DYSF	3097	early endosome	GO:0005769	cellular component	26	4	0.08599	0.0295	0.004691	0.9443	0.003711	0.08287	0.08923	0.02048	0.04249	0.0035	0.006287
1830	26903	DYSF	3097	endocytic vesicle	GO:0030139	cellular component	26	8	0.08599	0.03262	0.01003	0.8839	0.04211	0.08287	0.08923	0.0187	0.0569	0.003348	0.03005
1831	26903	DYSF	3097	calcium-dependent phospholipid binding	GO:0005544	molecular function	26	2	0.08599	0.03409	0.009759	0.9126	0.004642	0.08287	0.08923	0.02668	0.04356	0.008121	0.01173
1832	26903	DYSF	3097	cytoplasmic vesicle	GO:0031410	cellular component	26	33	0.08599	0.03563	0.01192	0.8959	0.01062	0.08287	0.08923	0.02999	0.04234	0.008976	0.01582
1833	26903	DYSF	3097	endosome	GO:0005768	cellular component	26	12	0.08599	0.03924	0.01615	0.8619	0.02014	0.08287	0.08923	0.02726	0.05647	0.01132	0.02303
1834	26903	DYSF	3097	plasma membrane	GO:0005886	cellular component	26	52	0.08599	0.03939	0.01841	0.8404	0.02685	0.08287	0.08923	0.0346	0.04484	0.01099	0.03085
1835	26903	DYSF	3097	calcium ion binding	GO:0005509	molecular function	26	6	0.08738	0.0457	0.03445	0.7551	0.008103	0.08421	0.09068	0.03403	0.06138	0.03004	0.03951
1836	26903	DYSF	3097	centriolar satellite	GO:0034451	cellular component	26	3	0.08846	0.04571	0.03256	0.7633	0.01493	0.08591	0.09108	0.03324	0.06287	0.02532	0.04187
1837	26903	DYSF	3097	membrane fusion	GO:0061025	biological process	26	6	0.08889	0.0419	0.01978	0.8296	0.04636	0.08551	0.0924	0.02671	0.06573	0.008542	0.04582
1838	26903	DYSF	3097	phospholipid binding	GO:0005543	molecular function	26	13	0.08958	0.0457	0.03595	0.7494	0.01677	0.0851	0.0943	0.03322	0.06287	0.02694	0.04799
1839	26903	DYSF	3097	extracellular exosome	GO:0070062	cellular component	26	24	0.09069	0.04937	0.03539	0.7518	0.02231	0.07901	0.1041	0.04212	0.05786	0.0242	0.05176
1840	26903	DYSF	3097	T-tubule organization	GO:0033292	biological process	26	2	0.09078	0.0424	0.02376	0.8075	0.0464	0.08403	0.09806	0.02741	0.06558	0.01063	0.0531
1841	26903	DYSF	3097	monocyte activation involved in immune response	GO:0002280	biological process	26	3	0.09144	0.04415	0.03055	0.7736	0.03711	0.08348	0.1002	0.03049	0.06393	0.01649	0.0566
1842	26903	DYSF	3097	plasma membrane organization	GO:0007009	biological process	26	11	0.09155	0.04453	0.02939	0.7791	0.03628	0.08339	0.1005	0.03117	0.06363	0.01607	0.05375
1843	26903	DYSF	3097	T-tubule	GO:0030315	cellular component	26	3	0.09157	0.04496	0.0358	0.7499	0.02714	0.08337	0.1006	0.03193	0.06333	0.02263	0.05662
1844	26903	DYSF	3097	macrophage activation involved in immune response	GO:0002281	biological process	26	4	0.0921	0.04499	0.0349	0.754	0.03224	0.08293	0.1023	0.03191	0.06344	0.02037	0.05979
1845	26903	DYSF	3097	vesicle fusion	GO:0006906	biological process	26	21	0.09578	0.04378	0.02538	0.788	0.06273	0.07993	0.1148	0.02504	0.07652	0.007795	0.08263
1846	26903	DYSF	3097	protein binding	GO:0005515	molecular function	26	237	0.09602	0.0547	0.03785	0.7434	0.0391	0.08347	0.1105	0.05114	0.05851	0.01978	0.07241
1847	26903	DYSF	3097	negative regulation of phagocytosis	GO:0050765	biological process	26	7	0.2109	0.164	0.164	0.5087	0.05232	0.1254	0.3546	0.07959	0.338	0.07959	0.338
1848	97114	H3C8	4772	DNA replication-dependent nucleosome assembly	GO:0006335	biological process	19	3	0.08599	0.02985	0.006063	0.9129	0.03257	0.08287	0.08923	0.02006	0.04442	0.001552	0.02369
1849	97114	H3C8	4772	cadherin binding	GO:0045296	molecular function	19	6	0.08599	0.03342	0.01219	0.8856	0.02588	0.08287	0.08923	0.02799	0.03991	0.006886	0.02159
1850	97114	H3C8	4772	nucleosome assembly	GO:0006334	biological process	19	9	0.08599	0.03342	0.01279	0.8779	0.02358	0.08287	0.08923	0.02799	0.03991	0.006411	0.0255
1851	97114	H3C8	4772	nucleus	GO:0005634	cellular component	19	48	0.08599	0.03342	0.01472	0.8732	0.01518	0.08287	0.08923	0.02799	0.03991	0.01059	0.02047
1852	97114	H3C8	4772	protein binding	GO:0005515	molecular function	19	237	0.08599	0.03342	0.01759	0.8541	0.002296	0.08287	0.08923	0.02799	0.03991	0.017	0.01821
1853	97114	H3C8	4772	extracellular exosome	GO:0070062	cellular component	19	24	0.08599	0.03533	0.02288	0.8145	0.02386	0.08287	0.08923	0.02788	0.04479	0.01549	0.03378
1854	97114	H3C8	4772	nucleosome	GO:0000786	cellular component	19	6	0.08599	0.03571	0.02376	0.809	0.01807	0.08287	0.08923	0.0281	0.04537	0.01778	0.03175
1855	97114	H3C8	4772	regulation of gene silencing	GO:0060968	biological process	19	7	0.08615	0.03691	0.01497	0.8598	0.03544	0.08276	0.08968	0.03553	0.03834	0.006982	0.0321
1856	97114	H3C8	4772	nuclear chromosome	GO:0000228	cellular component	19	4	0.08735	0.04113	0.03515	0.7522	0.001794	0.08386	0.09098	0.03756	0.04505	0.03414	0.0362
1857	97114	H3C8	4772	membrane	GO:0016020	cellular component	19	35	0.08883	0.04169	0.03759	0.7427	0.007532	0.08643	0.0913	0.03728	0.04663	0.03312	0.04266
1858	97114	H3C8	4772	protein-containing complex	GO:0032991	cellular component	19	345	0.3195	0.2823	0.2823	0.4037	0.03957	0.2255	0.4527	0.1796	0.4438	0.1796	0.4438
1859	68750	RREB1	10449	DNA-binding transcription activator activity, RNA polymerase II-specific	GO:0001228	molecular function	16	6	0.08599	0.06872	0.01495	0.8722	0.01394	0.08287	0.08923	0.0476	0.0992	0.01118	0.01999
1860	68750	RREB1	10449	RNA polymerase II transcription regulatory region sequence-specific DNA binding	GO:0000977	molecular function	16	6	0.08599	0.06872	0.0159	0.859	0.02878	0.08287	0.08923	0.0476	0.0992	0.009042	0.02798
1861	68750	RREB1	10449	RNA polymerase II cis-regulatory region sequence-specific DNA binding	GO:0000978	molecular function	16	22	0.08599	0.07233	0.02491	0.8018	0.005458	0.08287	0.08923	0.05166	0.1013	0.02281	0.0272
1862	68750	RREB1	10449	regulation of transcription by RNA polymerase II	GO:0006357	biological process	16	42	0.08941	0.08513	0.03182	0.7676	0.03241	0.08563	0.09337	0.06335	0.1144	0.01861	0.05441
1863	68750	RREB1	10449	negative regulation of transcription by RNA polymerase II	GO:0000122	biological process	16	29	0.09144	0.07861	0.0341	0.7567	0.02578	0.0784	0.1066	0.04802	0.1287	0.022	0.05285
1864	68750	RREB1	10449	positive regulation of epithelial cell migration	GO:0010634	biological process	16	6	0.09551	0.07468	0.02363	0.7917	0.0642	0.07521	0.1213	0.04396	0.1269	0.006501	0.0859
1865	68750	RREB1	10449	positive regulation of wound healing, spreading of epidermal cells	GO:1903691	biological process	16	4	0.1011	0.0748	0.02434	0.7957	0.07768	0.07121	0.1436	0.0439	0.1274	0.006187	0.09579
1866	68750	RREB1	10449	positive regulation of transcription by RNA polymerase II	GO:0045944	biological process	16	43	0.1043	0.08895	0.05038	0.701	0.03087	0.08538	0.1274	0.0548	0.1444	0.0299	0.08488
1867	68750	RREB1	10449	nuclear speck	GO:0016607	cellular component	16	6	0.1082	0.08895	0.04333	0.7231	0.06027	0.08607	0.1361	0.0548	0.1444	0.01593	0.1178
1868	68750	RREB1	10449	fibrillar center	GO:0001650	cellular component	16	2	0.1114	0.09418	0.06296	0.6692	0.01429	0.09409	0.1319	0.06446	0.1376	0.04991	0.07942
1869	68750	RREB1	10449	positive regulation of substrate adhesion-dependent cell spreading	GO:1900026	biological process	16	5	0.1272	0.1036	0.07739	0.6358	0.04178	0.08404	0.1925	0.05899	0.1821	0.04054	0.1477
1870	68750	RREB1	10449	extracellular exosome	GO:0070062	cellular component	16	24	0.1311	0.1022	0.0805	0.6308	0.03629	0.09236	0.1862	0.06518	0.1602	0.04554	0.1423
1871	68750	RREB1	10449	nucleus	GO:0005634	cellular component	16	48	0.1482	0.1148	0.1005	0.5965	0.0327	0.1051	0.209	0.07011	0.188	0.06127	0.1648
1872	68750	RREB1	10449	positive regulation of mammary gland epithelial cell proliferation	GO:0033601	biological process	16	5	0.1896	0.1508	0.144	0.5356	0.03568	0.1317	0.2728	0.09836	0.2311	0.0898	0.2309
1873	68750	RREB1	10449	positive regulation of lamellipodium morphogenesis	GO:2000394	biological process	16	4	0.1931	0.155	0.1476	0.5321	0.03102	0.1407	0.2649	0.1033	0.2326	0.09765	0.2231
1874	665596	H2BC9	4755	ubiquitin-like protein ligase binding	GO:0044389	molecular function	20	5	0.08599	0.008479	0.0007708	0.9754	0.005894	0.08287	0.08923	0.002614	0.0275	0.0002376	0.0025
1875	665596	H2BC9	4755	enzyme binding	GO:0019899	molecular function	20	34	0.08599	0.03474	0.009572	0.9143	0.002518	0.08287	0.08923	0.02709	0.04456	0.00867	0.01057
1876	665596	H2BC9	4755	nucleus	GO:0005634	cellular component	20	48	0.08599	0.03474	0.01919	0.8401	0.01639	0.08287	0.08923	0.02709	0.04456	0.01458	0.02527
1877	665596	H2BC9	4755	protein binding	GO:0005515	molecular function	20	237	0.08599	0.03474	0.02178	0.8224	0.007757	0.08287	0.08923	0.02709	0.04456	0.01933	0.02453
1878	665596	H2BC9	4755	nucleosome assembly	GO:0006334	biological process	20	9	0.08599	0.03474	0.02205	0.8207	0.009839	0.08287	0.08923	0.02709	0.04456	0.01893	0.02568
1879	665596	H2BC9	4755	DNA binding	GO:0003677	molecular function	20	24	0.08599	0.03474	0.0226	0.8162	0.01459	0.08287	0.08923	0.02709	0.04456	0.01787	0.02859
1880	665596	H2BC9	4755	nucleoplasm	GO:0005654	cellular component	20	26	0.08599	0.03478	0.02433	0.8063	0.01669	0.08287	0.08923	0.02706	0.04468	0.01859	0.03186
1881	665596	H2BC9	4755	cytosol	GO:0005829	cellular component	20	32	0.08599	0.03478	0.02754	0.7872	0.01101	0.08287	0.08923	0.02706	0.04468	0.02289	0.03313
1882	665596	H2BC9	4755	STAT family protein binding	GO:0097677	molecular function	20	2	0.08614	0.03478	0.02701	0.7906	0.02027	0.08301	0.08939	0.02706	0.04468	0.01935	0.03771
1883	665596	H2BC9	4755	extracellular exosome	GO:0070062	cellular component	20	24	0.08701	0.03581	0.0323	0.7644	0.01509	0.08383	0.09032	0.02814	0.04555	0.02506	0.04162
1884	665596	H2BC9	4755	protein-containing complex	GO:0032991	cellular component	20	345	0.3419	0.3096	0.3096	0.3875	0.003877	0.3285	0.3557	0.2974	0.3222	0.2974	0.3222
1885	243914	LGI4	18712	regulation of myelination	GO:0031641	biological process	2	5	0.1056	0.0572	0.0572	0.6835	0.004715	0.09868	0.113	0.05291	0.06183	0.05291	0.06183
1886	234683	ELMO3	17289	cell motility	GO:0048870	biological process	3	15	0.1724	0.2575	0.1251	0.5615	0.02352	0.1392	0.2134	0.2133	0.311	0.08885	0.176
1887	234683	ELMO3	17289	actin filament organization	GO:0007015	biological process	3	15	0.2381	0.2575	0.1962	0.4812	0.02169	0.1917	0.2958	0.2133	0.311	0.1505	0.2559
1888	234683	ELMO3	17289	protein binding	GO:0005515	molecular function	3	237	0.2947	0.2575	0.2575	0.4268	0.0168	0.2515	0.3453	0.2133	0.311	0.2133	0.311
1889	11535	ADM	259	G protein-coupled receptor internalization	GO:0002031	biological process	15	4	0.1013	0.1307	0.02663	0.7837	0.07509	0.07113	0.1441	0.0458	0.3732	0.007059	0.1004
1890	11535	ADM	259	vasculogenesis	GO:0001570	biological process	15	4	0.1089	0.1307	0.04834	0.7033	0.06174	0.06634	0.1788	0.0458	0.3732	0.01788	0.1307
1891	11535	ADM	259	adrenomedullin receptor binding	GO:0031700	molecular function	15	2	0.1108	0.1307	0.04835	0.7028	0.06607	0.06524	0.1882	0.0458	0.3732	0.01679	0.1393
1892	11535	ADM	259	extracellular space	GO:0005615	cellular component	15	17	0.1115	0.1307	0.03742	0.7412	0.084	0.06483	0.1919	0.0458	0.3732	0.009792	0.143
1893	11535	ADM	259	receptor internalization	GO:0031623	biological process	15	11	0.1294	0.1912	0.08237	0.6291	0.007323	0.1263	0.1324	0.09693	0.3771	0.07351	0.0923
1894	11535	ADM	259	adenylate cyclase-activating G protein-coupled receptor signaling pathway	GO:0007189	biological process	15	9	0.1311	0.1379	0.05718	0.6675	0.1047	0.05553	0.3093	0.04349	0.4375	0.0121	0.2702
1895	11535	ADM	259	cytoplasm	GO:0005737	cellular component	15	35	0.132	0.1627	0.07771	0.6302	0.0668	0.06871	0.2537	0.06182	0.4281	0.02897	0.2085
1896	11535	ADM	259	adrenomedullin receptor signaling pathway	GO:1990410	biological process	15	2	0.1441	0.1721	0.09269	0.6028	0.06403	0.07587	0.2735	0.06892	0.4299	0.03711	0.2315
1897	11535	ADM	259	amylin receptor signaling pathway	GO:0097647	biological process	15	5	0.2142	0.2274	0.1689	0.5047	0.0481	0.1342	0.342	0.1167	0.4432	0.09282	0.3073
1898	11535	ADM	259	regulation of urine volume	GO:0035809	biological process	15	5	0.244	0.2514	0.1933	0.4566	0.1067	0.09515	0.6255	0.08788	0.7189	0.06043	0.6186
1899	11535	ADM	259	positive regulation of heart rate	GO:0010460	biological process	15	7	0.3155	0.3296	0.2781	0.4041	0.0519	0.1994	0.499	0.1761	0.6166	0.1623	0.4766
1900	11535	ADM	259	regulation of systemic arterial blood pressure	GO:0003073	biological process	15	7	0.422	0.4123	0.3932	0.3191	0.06094	0.2647	0.6728	0.2361	0.7201	0.2332	0.6628
1901	11535	ADM	259	negative regulation of vasoconstriction	GO:0045906	biological process	15	4	0.433	0.4196	0.3969	0.2761	0.1244	0.1937	0.9679	0.1851	0.9513	0.1618	0.9736
1902	320159	TOGARAM2	33715	microtubule cytoskeleton organization	GO:0000226	biological process	8	22	0.08599	0.0672	0.01775	0.8513	0.01531	0.08287	0.08923	0.04716	0.09577	0.01372	0.02296
1903	320159	TOGARAM2	33715	microtubule organizing center	GO:0005815	cellular component	8	7	0.08604	0.0672	0.02065	0.829	0.02137	0.08284	0.08936	0.04716	0.09577	0.01446	0.02949
1904	320159	TOGARAM2	33715	mitotic spindle	GO:0072686	cellular component	8	2	0.09265	0.06949	0.03255	0.7644	0.03855	0.07926	0.1083	0.04679	0.1032	0.01718	0.06166
1905	320159	TOGARAM2	33715	mitotic spindle assembly	GO:0090307	biological process	8	3	0.09563	0.07686	0.03854	0.7393	0.03228	0.08394	0.109	0.04459	0.1325	0.02237	0.06643
1906	320159	TOGARAM2	33715	cilium	GO:0005929	cellular component	8	8	0.1238	0.1052	0.06236	0.6662	0.0633	0.0787	0.1948	0.05337	0.2075	0.02262	0.1719
1907	320159	TOGARAM2	33715	spindle microtubule	GO:0005876	cellular component	8	6	0.1374	0.106	0.08452	0.6199	0.05301	0.08285	0.2279	0.05414	0.2075	0.03855	0.1853
1908	320159	TOGARAM2	33715	cytoplasmic microtubule	GO:0005881	cellular component	8	5	0.1449	0.1094	0.09357	0.6052	0.04685	0.09171	0.229	0.0576	0.208	0.04716	0.1857
1909	320159	TOGARAM2	33715	microtubule binding	GO:0008017	molecular function	8	5	0.1851	0.1391	0.1391	0.5426	0.03068	0.1371	0.2499	0.09209	0.2101	0.09209	0.2101

## Sheet: Chd8_up
	entrez_mouse	hgnc_symbol	hgnc_id	go_name	go_id	go_domain	ncon_gene	ncon_go	global_padj	gene_padj	pval	sim	sem_sim	cilow_global_padj	ciupp_global_padj	cilow_gene_padj	ciupp_gene_padj	cilow_pval	ciupp_pval
0	330401	TMCC1	29116	endoplasmic reticulum-endosome membrane contact site	GO:0140284	cellular component	11	2	0.07306	0.01106	0.001086	0.9674	0.008288	0.06751	0.07907	0.003929	0.03113	0.0003319	0.003555
1	330401	TMCC1	29116	rough endoplasmic reticulum	GO:0005791	cellular component	11	2	0.07306	0.03074	0.007154	0.9232	0.002202	0.06751	0.07907	0.02461	0.03839	0.006374	0.008031
2	330401	TMCC1	29116	endosomal transport	GO:0016197	biological process	11	9	0.07306	0.03101	0.01093	0.8898	0.01855	0.06751	0.07907	0.02449	0.03926	0.006395	0.01868
3	330401	TMCC1	29116	endosome membrane tubulation	GO:0097750	biological process	11	3	0.07306	0.0312	0.01093	0.8975	0.005418	0.06751	0.07907	0.02491	0.03907	0.009228	0.01296
4	330401	TMCC1	29116	endosome fission	GO:0140285	biological process	11	2	0.07306	0.04311	0.01951	0.8307	0.01628	0.06751	0.07907	0.03546	0.05243	0.01468	0.02593
5	330401	TMCC1	29116	endoplasmic reticulum organization	GO:0007029	biological process	11	8	0.07412	0.04848	0.02826	0.7802	0.007045	0.06776	0.08107	0.04071	0.05773	0.02489	0.0321
6	330401	TMCC1	29116	endomembrane system	GO:0012505	cellular component	11	2	0.08049	0.05544	0.03504	0.752	0.02495	0.07093	0.09134	0.04056	0.07577	0.02226	0.05514
7	330401	TMCC1	29116	membrane fission	GO:0090148	biological process	11	4	0.08543	0.06311	0.04484	0.7192	0.01802	0.07589	0.09616	0.05008	0.07954	0.03243	0.06199
8	330401	TMCC1	29116	identical protein binding	GO:0042802	molecular function	11	33	0.09907	0.07489	0.06347	0.672	0.004042	0.0916	0.1071	0.06539	0.08578	0.05936	0.06786
9	330401	TMCC1	29116	cytosol	GO:0005829	cellular component	11	63	0.1087	0.08284	0.07437	0.6489	0.01831	0.0874	0.1351	0.06251	0.1098	0.05495	0.1006
10	330401	TMCC1	29116	protein binding	GO:0005515	molecular function	11	344	0.1521	0.1247	0.1247	0.5698	0.006649	0.1385	0.167	0.1132	0.1374	0.1132	0.1374
11	12484	CD24	1645	regulation of MAPK cascade	GO:0043408	biological process	22	8	0.08232	0.3391	0.03672	0.7463	0.03613	0.06636	0.1021	0.2299	0.5001	0.01929	0.0699
12	12484	CD24	1645	positive regulation of MAP kinase activity	GO:0043406	biological process	22	9	0.08974	0.3391	0.05032	0.7028	0.02926	0.06819	0.1181	0.2299	0.5001	0.02993	0.0846
13	12484	CD24	1645	membrane raft	GO:0045121	cellular component	22	6	0.1225	0.3391	0.088	0.6204	0.04299	0.07768	0.1933	0.2299	0.5001	0.04417	0.1753
14	12484	CD24	1645	response to hypoxia	GO:0001666	biological process	22	7	0.1349	0.3563	0.09955	0.6011	0.0451	0.08469	0.2148	0.2298	0.5525	0.05081	0.195
15	12484	CD24	1645	protein tyrosine kinase activator activity	GO:0030296	molecular function	22	4	0.1364	0.3391	0.105	0.5947	0.03484	0.09204	0.2023	0.2299	0.5001	0.06273	0.1757
16	12484	CD24	1645	anchored component of external side of plasma membrane	GO:0031362	cellular component	22	3	0.14	0.3391	0.1102	0.5895	0.01743	0.1158	0.1694	0.2299	0.5001	0.08443	0.1438
17	12484	CD24	1645	positive regulation of activated T cell proliferation	GO:0042104	biological process	22	3	0.1495	0.3391	0.1215	0.5731	0.02221	0.114	0.1962	0.2299	0.5001	0.08795	0.1678
18	12484	CD24	1645	response to estrogen	GO:0043627	biological process	22	3	0.1707	0.3563	0.1368	0.5462	0.05717	0.09449	0.3085	0.2298	0.5525	0.06398	0.2925
19	12484	CD24	1645	cell activation	GO:0001775	biological process	22	16	0.218	0.357	0.1922	0.4835	0.06279	0.1141	0.4167	0.2267	0.5621	0.09202	0.4016
20	12484	CD24	1645	cell surface	GO:0009986	cellular component	22	19	0.2186	0.3751	0.1913	0.4879	0.04858	0.1293	0.3695	0.2304	0.6108	0.1004	0.3648
21	12484	CD24	1645	T cell costimulation	GO:0031295	biological process	22	4	0.2281	0.3604	0.203	0.4789	0.04102	0.1501	0.3466	0.2376	0.5466	0.1246	0.3306
22	12484	CD24	1645	positive regulation of cytosolic calcium ion concentration	GO:0007204	biological process	22	9	0.2533	0.3751	0.2257	0.4512	0.06403	0.131	0.4897	0.2304	0.6108	0.1044	0.4881
23	12484	CD24	1645	membrane	GO:0016020	cellular component	22	56	0.2582	0.3792	0.2366	0.4459	0.05042	0.1535	0.4343	0.2695	0.5335	0.1326	0.4222
24	12484	CD24	1645	B cell receptor transport into membrane raft	GO:0032597	biological process	22	4	0.2695	0.3751	0.2391	0.4352	0.07458	0.1244	0.584	0.2304	0.6108	0.09407	0.6077
25	12484	CD24	1645	glomerular visceral epithelial cell differentiation	GO:0072112	biological process	22	5	0.2817	0.3794	0.259	0.4278	0.0482	0.1705	0.4656	0.2382	0.6042	0.1464	0.4581
26	12484	CD24	1645	protein kinase binding	GO:0019901	molecular function	22	22	0.2848	0.3872	0.2648	0.4271	0.03068	0.2064	0.393	0.2531	0.5926	0.1852	0.3786
27	12484	CD24	1645	glomerular parietal epithelial cell differentiation	GO:0072139	biological process	22	4	0.3111	0.3812	0.2903	0.4029	0.04948	0.1881	0.5147	0.2416	0.6015	0.1651	0.5104
28	12484	CD24	1645	protein binding	GO:0005515	molecular function	22	344	0.3592	0.4041	0.3418	0.3684	0.03727	0.2508	0.5142	0.2759	0.5919	0.2325	0.5027
29	12484	CD24	1645	negative regulation of transforming growth factor beta3 production	GO:0032913	biological process	22	4	0.3746	0.4096	0.3565	0.3514	0.0615	0.2112	0.6644	0.2492	0.6733	0.191	0.6654
30	12484	CD24	1645	regulation of phosphorylation	GO:0042325	biological process	22	8	0.4226	0.4706	0.4095	0.326	0.0264	0.3361	0.5315	0.3775	0.5866	0.3228	0.5196
31	12484	CD24	1645	respiratory burst	GO:0045730	biological process	22	4	0.5228	0.5513	0.5126	0.2612	0.03681	0.3907	0.6997	0.466	0.6523	0.376	0.6989
32	12484	CD24	1645	positive regulation of nephron tubule epithelial cell differentiation	GO:2000768	biological process	22	3	0.608	0.629	0.6	0.2038	0.05403	0.4404	0.8393	0.4707	0.8406	0.4308	0.8357
33	18133	CCN3	7885	cell adhesion mediated by integrin	GO:0033627	biological process	27	5	0.07306	0.06905	0.0109	0.8794	0.03688	0.06751	0.07907	0.03989	0.1195	0.004553	0.02611
34	18133	CCN3	7885	chondrocyte differentiation	GO:0002062	biological process	27	3	0.07314	0.06905	0.02244	0.8118	0.009038	0.06771	0.07902	0.03989	0.1195	0.0192	0.02622
35	18133	CCN3	7885	endothelial cell chemotaxis	GO:0035767	biological process	27	4	0.07347	0.06905	0.02103	0.8213	0.02217	0.06793	0.07947	0.03989	0.1195	0.01429	0.03095
36	18133	CCN3	7885	integrin binding	GO:0005178	molecular function	27	10	0.07347	0.06905	0.02266	0.8108	0.02329	0.06793	0.07947	0.03989	0.1195	0.01511	0.03396
37	18133	CCN3	7885	negative regulation of chondrocyte proliferation	GO:1902731	biological process	27	2	0.07389	0.06905	0.0191	0.8318	0.03183	0.06825	0.08001	0.03989	0.1195	0.01058	0.03446
38	18133	CCN3	7885	Notch binding	GO:0005112	molecular function	27	2	0.07403	0.06905	0.02584	0.7925	0.01523	0.06833	0.08021	0.03989	0.1195	0.01959	0.03408
39	18133	CCN3	7885	endothelial cell-cell adhesion	GO:0071603	biological process	27	2	0.07655	0.06905	0.02945	0.775	0.02557	0.06833	0.08575	0.03989	0.1195	0.01858	0.04667
40	18133	CCN3	7885	negative regulation of monocyte chemotaxis	GO:0090027	biological process	27	4	0.07687	0.06905	0.02386	0.802	0.04262	0.0682	0.08665	0.03989	0.1195	0.01096	0.05192
41	18133	CCN3	7885	positive regulation of Notch signaling pathway	GO:0045747	biological process	27	4	0.07697	0.06905	0.02605	0.7908	0.04113	0.06833	0.0867	0.03989	0.1195	0.01235	0.05497
42	18133	CCN3	7885	cell adhesion	GO:0007155	biological process	27	12	0.07801	0.06905	0.03311	0.7593	0.02601	0.06813	0.08933	0.03989	0.1195	0.02069	0.05299
43	18133	CCN3	7885	extracellular matrix	GO:0031012	cellular component	27	15	0.07834	0.06905	0.02643	0.7907	0.04089	0.06746	0.09097	0.03989	0.1195	0.01274	0.05483
44	18133	CCN3	7885	gap junction	GO:0005921	cellular component	27	2	0.07985	0.06905	0.01852	0.8159	0.06144	0.06653	0.09584	0.03989	0.1195	0.004712	0.07276
45	18133	CCN3	7885	cell chemotaxis	GO:0060326	biological process	27	17	0.07995	0.06905	0.02512	0.7981	0.05061	0.06646	0.09618	0.03989	0.1195	0.01025	0.06156
46	18133	CCN3	7885	smooth muscle cell migration	GO:0014909	biological process	27	6	0.08998	0.08914	0.05061	0.702	0.02419	0.07646	0.1059	0.05623	0.1413	0.03303	0.07756
47	18133	CCN3	7885	angiogenesis	GO:0001525	biological process	27	15	0.103	0.1039	0.06804	0.6617	0.01958	0.08171	0.1299	0.08503	0.1269	0.04912	0.09424
48	18133	CCN3	7885	negative regulation of cell growth	GO:0030308	biological process	27	15	0.1049	0.09136	0.05661	0.683	0.05819	0.0704	0.1564	0.04714	0.1771	0.02104	0.1523
49	18133	CCN3	7885	hematopoietic stem cell homeostasis	GO:0061484	biological process	27	2	0.1128	0.1067	0.07645	0.6436	0.02904	0.08728	0.1458	0.0696	0.1636	0.04796	0.1219
50	18133	CCN3	7885	heparin binding	GO:0008201	molecular function	27	4	0.1194	0.1139	0.08426	0.6284	0.03456	0.08442	0.1688	0.07463	0.1737	0.04882	0.1454
51	18133	CCN3	7885	fibroblast migration	GO:0010761	biological process	27	3	0.1219	0.1018	0.07259	0.6409	0.0759	0.06157	0.2413	0.0431	0.2406	0.02242	0.235
52	18133	CCN3	7885	intracellular membrane-bounded organelle	GO:0043231	cellular component	27	46	0.1283	0.1235	0.09024	0.6157	0.04688	0.08355	0.1969	0.07354	0.2073	0.04309	0.189
53	18133	CCN3	7885	negative regulation of cell death	GO:0060548	biological process	27	7	0.1331	0.1349	0.1017	0.6016	0.02207	0.1069	0.1656	0.09935	0.1833	0.07292	0.1417
54	18133	CCN3	7885	signal transduction	GO:0007165	biological process	27	46	0.1494	0.1347	0.1123	0.5772	0.0627	0.07788	0.2867	0.06886	0.2634	0.0461	0.2736
55	18133	CCN3	7885	protein binding	GO:0005515	molecular function	27	344	0.1585	0.1552	0.132	0.5598	0.01541	0.1314	0.1911	0.1367	0.1762	0.1057	0.1648
56	18133	CCN3	7885	smooth muscle cell proliferation	GO:0048659	biological process	27	3	0.159	0.1522	0.1262	0.5633	0.04188	0.1053	0.2399	0.09387	0.2466	0.06944	0.2294
57	18133	CCN3	7885	negative regulation of myotube differentiation	GO:0010832	biological process	27	4	0.1598	0.147	0.1237	0.5655	0.04816	0.102	0.2505	0.08373	0.2581	0.05971	0.2561
58	18133	CCN3	7885	cytoplasm	GO:0005737	cellular component	27	82	0.1611	0.1531	0.1345	0.5565	0.01851	0.1306	0.1987	0.1317	0.178	0.1037	0.1744
59	18133	CCN3	7885	negative regulation of NIK/NF-kappaB signaling	GO:1901223	biological process	27	3	0.1654	0.1617	0.1382	0.552	0.01842	0.137	0.1996	0.1239	0.2112	0.1071	0.1783
60	56431	DSTN	15750	actin filament binding	GO:0051015	molecular function	14	11	0.07306	0.0133	0.002228	0.9571	0.005853	0.06751	0.07907	0.008357	0.02116	0.001079	0.004601
61	56431	DSTN	15750	actin filament fragmentation	GO:0030043	biological process	14	2	0.07306	0.01529	0.002697	0.9515	0.008314	0.06751	0.07907	0.00886	0.02639	0.0009953	0.007307
62	56431	DSTN	15750	actin filament severing	GO:0051014	biological process	14	4	0.07306	0.02052	0.009466	0.9011	0.01475	0.06751	0.07907	0.01506	0.02797	0.00514	0.01744
63	56431	DSTN	15750	actin cytoskeleton	GO:0015629	cellular component	14	15	0.07306	0.02363	0.0103	0.9015	0.007621	0.06751	0.07907	0.02129	0.02623	0.008222	0.0129
64	56431	DSTN	15750	actin filament depolymerization	GO:0030042	biological process	14	6	0.07306	0.02363	0.01277	0.8809	0.01351	0.06751	0.07907	0.02129	0.02623	0.009294	0.01756
65	56431	DSTN	15750	cell motility	GO:0048870	biological process	14	15	0.07306	0.02438	0.01892	0.8351	0.01148	0.06751	0.07907	0.02179	0.02728	0.0155	0.02309
66	56431	DSTN	15750	extracellular exosome	GO:0070062	cellular component	14	51	0.07366	0.02786	0.02269	0.8103	0.01546	0.06706	0.08091	0.02015	0.03853	0.0173	0.02976
67	56431	DSTN	15750	cytoplasm	GO:0005737	cellular component	14	82	0.0749	0.02911	0.02598	0.7923	0.02222	0.06608	0.0849	0.01939	0.04372	0.01743	0.03871
68	56431	DSTN	15750	protein binding	GO:0005515	molecular function	14	344	0.07938	0.03279	0.03279	0.7605	0.02825	0.06527	0.09654	0.01966	0.05468	0.01966	0.05468
69	18484	PAM	8596	peptidylglycine monooxygenase activity	GO:0004504	molecular function	10	2	0.1146	0.212	0.07504	0.6435	0.0491	0.07259	0.1809	0.1885	0.2385	0.03291	0.1711
70	18484	PAM	8596	extracellular exosome	GO:0070062	cellular component	10	51	0.129	0.212	0.09897	0.607	0.001002	0.1249	0.1333	0.1885	0.2385	0.0974	0.1006
71	18484	PAM	8596	response to zinc ion	GO:0010043	biological process	10	4	0.1363	0.212	0.103	0.5962	0.04227	0.08648	0.215	0.1885	0.2385	0.05315	0.1996
72	18484	PAM	8596	peptide amidation	GO:0001519	biological process	10	2	0.1405	0.212	0.1083	0.5884	0.04157	0.08802	0.2242	0.1885	0.2385	0.05932	0.1976
73	18484	PAM	8596	protein binding	GO:0005515	molecular function	10	344	0.1496	0.212	0.1206	0.5749	0.01592	0.1301	0.1721	0.1885	0.2385	0.09561	0.1521
74	18484	PAM	8596	membrane	GO:0016020	cellular component	10	56	0.1753	0.212	0.1498	0.5387	0.002416	0.1713	0.1793	0.1885	0.2385	0.1449	0.1548
75	18484	PAM	8596	zinc ion binding	GO:0008270	molecular function	10	7	0.1764	0.2188	0.1484	0.5392	0.0237	0.1409	0.2208	0.2033	0.2355	0.1062	0.2073
76	18484	PAM	8596	extracellular region	GO:0005576	cellular component	10	16	0.2003	0.2144	0.1764	0.5086	0.02006	0.1585	0.2531	0.1904	0.2416	0.1351	0.2302
77	18484	PAM	8596	peptidylamidoglycolate lyase activity	GO:0004598	molecular function	10	3	0.5923	0.5841	0.5841	0.2184	0.04126	0.4557	0.7697	0.4452	0.7664	0.4452	0.7664
78	75826	SENP2	23116	SUMO-specific endopeptidase activity	GO:0070139	molecular function	10	3	0.1449	0.5269	0.1159	0.5815	0.01186	0.1319	0.1592	0.5081	0.5464	0.09706	0.1385
79	75826	SENP2	23116	SUMO-specific protease activity	GO:0016929	molecular function	10	4	0.1885	0.5269	0.1635	0.5233	0.007753	0.1776	0.2	0.5081	0.5464	0.1472	0.1816
80	75826	SENP2	23116	protein desumoylation	GO:0016926	biological process	10	3	0.2673	0.5269	0.2457	0.4432	0.02622	0.2076	0.3443	0.5081	0.5464	0.1822	0.3314
81	75826	SENP2	23116	nucleus	GO:0005634	cellular component	10	82	0.2816	0.5269	0.2631	0.4303	0.008299	0.2572	0.3083	0.5081	0.5464	0.2392	0.2893
82	75826	SENP2	23116	protein destabilization	GO:0031648	biological process	10	4	0.3107	0.5269	0.2932	0.4056	0.02536	0.239	0.4038	0.5081	0.5464	0.2205	0.39
83	75826	SENP2	23116	cytosol	GO:0005829	cellular component	10	63	0.3805	0.5269	0.3667	0.3551	0.01614	0.3268	0.4431	0.5081	0.5464	0.3125	0.4303
84	75826	SENP2	23116	protein binding	GO:0005515	molecular function	10	344	0.4297	0.5385	0.4173	0.3234	0.003067	0.4169	0.4429	0.4976	0.5828	0.4054	0.4295
85	75826	SENP2	23116	negative regulation of protein ubiquitination	GO:0031397	biological process	10	8	0.5063	0.6304	0.4916	0.2359	0.1045	0.2606	0.9834	0.4278	0.929	0.2453	0.9853
86	75826	SENP2	23116	nuclear pore	GO:0005643	cellular component	10	3	0.5188	0.5878	0.5086	0.268	0.01606	0.4588	0.5867	0.4795	0.7205	0.4475	0.5781
87	75826	SENP2	23116	positive regulation of protein ubiquitination	GO:0031398	biological process	10	11	0.7731	0.7803	0.77	0.1061	0.0421	0.6256	0.9554	0.6181	0.9851	0.6219	0.9535
88	26395	MAP2K1	6840	scaffold protein binding	GO:0097110	molecular function	34	2	0.07306	0.03703	0.003043	0.9426	0.01544	0.06751	0.07907	0.01362	0.1007	0.0006556	0.01412
89	26395	MAP2K1	6840	protein N-terminus binding	GO:0047485	molecular function	34	4	0.07306	0.03703	0.003788	0.9366	0.0164	0.06751	0.07907	0.01362	0.1007	0.001019	0.01409
90	26395	MAP2K1	6840	protein C-terminus binding	GO:0008022	molecular function	34	4	0.07306	0.04454	0.006493	0.9219	0.01301	0.06751	0.07907	0.02345	0.0846	0.002846	0.01481
91	26395	MAP2K1	6840	positive regulation of protein serine/threonine kinase activity	GO:0071902	biological process	34	8	0.07306	0.04938	0.01046	0.8893	0.02046	0.06751	0.07907	0.03171	0.0769	0.005103	0.02146
92	26395	MAP2K1	6840	peptidyl-threonine phosphorylation	GO:0018107	biological process	34	7	0.07306	0.05148	0.01168	0.8921	0.004113	0.06751	0.07907	0.03577	0.07408	0.01037	0.01316
93	26395	MAP2K1	6840	protein serine/threonine kinase activator activity	GO:0043539	molecular function	34	4	0.07306	0.05149	0.01661	0.8526	0.01012	0.06751	0.07907	0.03577	0.07412	0.01374	0.02008
94	26395	MAP2K1	6840	cell cycle arrest	GO:0007050	biological process	34	6	0.07306	0.05149	0.02196	0.8146	0.007684	0.06751	0.07907	0.03577	0.07412	0.01922	0.02508
95	26395	MAP2K1	6840	positive regulation of ERK1 and ERK2 cascade	GO:0070374	biological process	34	8	0.07323	0.05149	0.02119	0.8195	0.01626	0.06739	0.07959	0.03577	0.07412	0.01601	0.02805
96	26395	MAP2K1	6840	MAP-kinase scaffold activity	GO:0005078	molecular function	34	2	0.07341	0.05149	0.02064	0.823	0.01912	0.06833	0.07887	0.03577	0.07412	0.01482	0.02875
97	26395	MAP2K1	6840	negative regulation of cell population proliferation	GO:0008285	biological process	34	34	0.07426	0.05149	0.02385	0.8033	0.01559	0.07017	0.0786	0.03577	0.07412	0.01806	0.03148
98	26395	MAP2K1	6840	ERK1 and ERK2 cascade	GO:0070371	biological process	34	2	0.07578	0.05428	0.02424	0.8022	0.03107	0.06539	0.08783	0.0348	0.08467	0.01393	0.04221
99	26395	MAP2K1	6840	positive regulation of production of miRNAs involved in gene silencing by miRNA	GO:1903800	biological process	34	6	0.07752	0.05503	0.03075	0.7694	0.02254	0.07244	0.08297	0.03631	0.08339	0.02047	0.0462
100	26395	MAP2K1	6840	MAP kinase kinase activity	GO:0004708	molecular function	34	3	0.07786	0.05428	0.02918	0.7766	0.0316	0.06636	0.09135	0.0348	0.08467	0.01664	0.05117
101	26395	MAP2K1	6840	activation of MAPK activity	GO:0000187	biological process	34	8	0.07976	0.05612	0.03562	0.7496	0.02115	0.07202	0.08833	0.0363	0.08676	0.02427	0.05226
102	26395	MAP2K1	6840	neuron differentiation	GO:0030182	biological process	34	18	0.08153	0.05882	0.03242	0.7624	0.04182	0.06375	0.1043	0.03291	0.1051	0.01539	0.06826
103	26395	MAP2K1	6840	cellular senescence	GO:0090398	biological process	34	6	0.08196	0.05883	0.03909	0.7372	0.01958	0.07232	0.09289	0.03626	0.09545	0.02741	0.05573
104	26395	MAP2K1	6840	positive regulation of transcription, DNA-templated	GO:0045893	biological process	34	32	0.08659	0.05952	0.0415	0.7281	0.04128	0.06141	0.1221	0.03291	0.1076	0.02005	0.08589
105	26395	MAP2K1	6840	protein serine/threonine kinase activity	GO:0004674	molecular function	34	31	0.08675	0.05923	0.03956	0.7337	0.04867	0.0584	0.1289	0.03273	0.1072	0.01688	0.09272
106	26395	MAP2K1	6840	protein phosphorylation	GO:0006468	biological process	34	27	0.1024	0.07222	0.05697	0.6836	0.05039	0.06945	0.151	0.03614	0.1443	0.02376	0.1366
107	26395	MAP2K1	6840	cytosol	GO:0005829	cellular component	34	63	0.1033	0.08017	0.0671	0.6635	0.01975	0.08337	0.128	0.05403	0.119	0.04763	0.09453
108	26395	MAP2K1	6840	endoplasmic reticulum	GO:0005783	cellular component	34	25	0.1046	0.07919	0.06665	0.6636	0.03149	0.07798	0.1403	0.04742	0.1322	0.03896	0.114
109	26395	MAP2K1	6840	protein binding	GO:0005515	molecular function	34	344	0.1058	0.08179	0.07045	0.6568	0.01739	0.0874	0.1281	0.05719	0.117	0.05238	0.09476
110	26395	MAP2K1	6840	plasma membrane	GO:0005886	cellular component	34	72	0.1095	0.08395	0.07519	0.6477	0.01498	0.09108	0.1315	0.06186	0.1139	0.05863	0.09643
111	26395	MAP2K1	6840	negative regulation of gene expression	GO:0010629	biological process	34	20	0.111	0.07911	0.07109	0.6524	0.04472	0.07325	0.1681	0.04215	0.1484	0.03344	0.1511
112	26395	MAP2K1	6840	positive regulation of gene expression	GO:0010628	biological process	34	21	0.1289	0.1029	0.09736	0.6088	0.01687	0.1085	0.1532	0.08167	0.1297	0.0752	0.126
113	13589	MAPRE1	6890	microtubule	GO:0005874	cellular component	38	9	0.07306	0.02442	0.002324	0.9568	0.004436	0.06751	0.07907	0.02407	0.02476	0.001409	0.003832
114	13589	MAPRE1	6890	mitotic spindle astral microtubule end	GO:1905721	cellular component	38	2	0.07306	0.02442	0.005822	0.9316	0.00408	0.06751	0.07907	0.02407	0.02476	0.004548	0.007453
115	13589	MAPRE1	6890	cortical microtubule cytoskeleton	GO:0030981	cellular component	38	2	0.07306	0.02442	0.006683	0.9247	0.007568	0.06751	0.07907	0.02407	0.02476	0.004287	0.01042
116	13589	MAPRE1	6890	microtubule plus-end binding	GO:0051010	molecular function	38	2	0.07306	0.02442	0.006475	0.9237	0.01117	0.06751	0.07907	0.02407	0.02476	0.003357	0.01249
117	13589	MAPRE1	6890	microtubule plus-end	GO:0035371	cellular component	38	4	0.07306	0.02442	0.00751	0.9186	0.009279	0.06751	0.07907	0.02407	0.02476	0.005046	0.01118
118	13589	MAPRE1	6890	spindle	GO:0005819	cellular component	38	6	0.07306	0.02442	0.008519	0.913	0.007046	0.06751	0.07907	0.02407	0.02476	0.006339	0.01145
119	13589	MAPRE1	6890	centrosome	GO:0005813	cellular component	38	10	0.07306	0.02442	0.0101	0.902	0.008785	0.06751	0.07907	0.02407	0.02476	0.007716	0.01323
120	13589	MAPRE1	6890	protein localization to microtubule plus-end	GO:1904825	biological process	38	3	0.07306	0.02442	0.01159	0.8929	0.004977	0.06751	0.07907	0.02407	0.02476	0.01007	0.01334
121	13589	MAPRE1	6890	regulation of microtubule polymerization or depolymerization	GO:0031110	biological process	38	6	0.07306	0.02442	0.01179	0.8906	0.00639	0.06751	0.07907	0.02407	0.02476	0.009969	0.01393
122	13589	MAPRE1	6890	protein localization to microtubule	GO:0035372	biological process	38	5	0.07306	0.02442	0.01258	0.8856	0.003691	0.06751	0.07907	0.02407	0.02476	0.0115	0.01376
123	13589	MAPRE1	6890	microtubule organizing center	GO:0005815	cellular component	38	9	0.07306	0.02456	0.01326	0.8789	0.00888	0.06751	0.07907	0.02413	0.02498	0.01063	0.01655
124	13589	MAPRE1	6890	spindle assembly	GO:0051225	biological process	38	7	0.07306	0.02482	0.01247	0.8851	0.009706	0.06751	0.07907	0.02428	0.02537	0.009751	0.01595
125	13589	MAPRE1	6890	negative regulation of microtubule polymerization	GO:0031115	biological process	38	6	0.07306	0.02494	0.01291	0.8806	0.01171	0.06751	0.07907	0.02395	0.02597	0.009579	0.01739
126	13589	MAPRE1	6890	spindle midzone	GO:0051233	cellular component	38	4	0.07306	0.02494	0.01605	0.855	0.01537	0.06751	0.07907	0.02395	0.02597	0.01176	0.02192
127	13589	MAPRE1	6890	cadherin binding	GO:0045296	molecular function	38	10	0.07306	0.02517	0.01321	0.8778	0.01371	0.06751	0.07907	0.02398	0.02641	0.009851	0.01772
128	13589	MAPRE1	6890	positive regulation of microtubule polymerization	GO:0031116	biological process	38	6	0.07306	0.0257	0.01855	0.8381	0.001771	0.06751	0.07907	0.02478	0.02666	0.01798	0.01915
129	13589	MAPRE1	6890	cell migration	GO:0016477	biological process	38	44	0.07306	0.02666	0.02124	0.8194	0.007385	0.06751	0.07907	0.02431	0.02924	0.01872	0.0241
130	13589	MAPRE1	6890	cytoplasmic microtubule	GO:0005881	cellular component	38	8	0.07306	0.02719	0.02109	0.8198	0.006208	0.06751	0.07907	0.02584	0.02861	0.01902	0.02338
131	13589	MAPRE1	6890	RNA binding	GO:0003723	molecular function	38	50	0.07425	0.03021	0.02515	0.7966	0.01995	0.06917	0.0797	0.02424	0.03765	0.01768	0.03578
132	13589	MAPRE1	6890	focal adhesion	GO:0005925	cellular component	38	23	0.07469	0.03155	0.02646	0.7891	0.01929	0.06625	0.08421	0.02408	0.04133	0.01863	0.0376
133	13589	MAPRE1	6890	identical protein binding	GO:0042802	molecular function	38	33	0.07766	0.03791	0.0345	0.7542	0.007374	0.07435	0.08112	0.03481	0.04129	0.03007	0.03959
134	13589	MAPRE1	6890	protein kinase binding	GO:0019901	molecular function	38	22	0.08024	0.04248	0.04001	0.7345	0.007237	0.07248	0.08883	0.03835	0.04707	0.03504	0.04568
135	13589	MAPRE1	6890	protein binding	GO:0005515	molecular function	38	344	0.09197	0.05456	0.05456	0.6929	0.005694	0.08494	0.0996	0.04925	0.06043	0.04925	0.06043
136	30928	ZBTB18	13030	DNA-binding transcription factor activity, RNA polymerase II-specific	GO:0000981	molecular function	18	18	0.07306	0.02279	0.005937	0.9249	0.01488	0.06751	0.07907	0.02006	0.02589	0.002809	0.01255
137	30928	ZBTB18	13030	regulation of transcription by RNA polymerase II	GO:0006357	biological process	18	47	0.07306	0.02279	0.007014	0.9208	0.01074	0.06751	0.07907	0.02006	0.02589	0.004016	0.01225
138	30928	ZBTB18	13030	RNA polymerase II cis-regulatory region sequence-specific DNA binding	GO:0000978	molecular function	18	27	0.07306	0.02279	0.009871	0.8963	0.02021	0.06751	0.07907	0.02006	0.02589	0.005417	0.01799
139	30928	ZBTB18	13030	DNA-binding transcription repressor activity, RNA polymerase II-specific	GO:0001227	molecular function	18	7	0.07306	0.02279	0.01053	0.8936	0.01879	0.06751	0.07907	0.02006	0.02589	0.006484	0.0171
140	30928	ZBTB18	13030	nuclear speck	GO:0016607	cellular component	18	9	0.07306	0.02279	0.01192	0.8828	0.02259	0.06751	0.07907	0.02006	0.02589	0.007155	0.01986
141	30928	ZBTB18	13030	negative regulation of transcription by RNA polymerase II	GO:0000122	biological process	18	34	0.07306	0.02409	0.01575	0.8597	0.007317	0.06751	0.07907	0.02329	0.02492	0.0137	0.01812
142	30928	ZBTB18	13030	nucleus	GO:0005634	cellular component	18	82	0.07306	0.02435	0.01767	0.8447	0.009666	0.06751	0.07907	0.02305	0.02572	0.01492	0.02094
143	30928	ZBTB18	13030	sequence-specific DNA binding	GO:0043565	molecular function	18	11	0.07306	0.0244	0.01223	0.8682	0.03065	0.06751	0.07907	0.02363	0.02519	0.004949	0.03024
144	30928	ZBTB18	13030	positive regulation of transcription by RNA polymerase II	GO:0045944	biological process	18	46	0.07306	0.0244	0.01534	0.8617	0.01518	0.06751	0.07907	0.02363	0.02519	0.01159	0.02029
145	30928	ZBTB18	13030	nucleoplasm	GO:0005654	cellular component	18	61	0.07306	0.02442	0.01775	0.8437	0.01755	0.06751	0.07907	0.02372	0.02515	0.01302	0.02419
146	30928	ZBTB18	13030	sequence-specific double-stranded DNA binding	GO:1990837	molecular function	18	18	0.07337	0.02373	0.0163	0.8479	0.0281	0.06824	0.07889	0.0196	0.02872	0.009027	0.02944
147	30928	ZBTB18	13030	protein binding	GO:0005515	molecular function	18	344	0.07387	0.02805	0.02715	0.7856	0.008712	0.06873	0.0794	0.02425	0.03244	0.02319	0.03178
148	30928	ZBTB18	13030	heterochromatin	GO:0000792	cellular component	18	11	0.07462	0.02721	0.02395	0.8033	0.02053	0.07083	0.07861	0.02149	0.03447	0.01664	0.03448
149	66356	KNOP1	34404	RNA binding	GO:0003723	molecular function	2	50	0.08022	0.05785	0.03311	0.759	0.03657	0.06632	0.09704	0.03887	0.08609	0.01717	0.06384
150	66356	KNOP1	34404	protein binding	GO:0005515	molecular function	2	344	0.1012	0.06544	0.06544	0.667	0.0197	0.08323	0.123	0.04658	0.09192	0.04658	0.09192
151	28146	SERP1	10759	cytoplasmic microtubule	GO:0005881	cellular component	6	8	0.1281	0.1364	0.08938	0.6158	0.05406	0.07502	0.2188	0.05249	0.3546	0.03759	0.2126
152	28146	SERP1	10759	protein binding	GO:0005515	molecular function	6	344	0.1513	0.1659	0.08138	0.592	0.1453	0.04092	0.5598	0.04074	0.6753	0.01183	0.5599
153	28146	SERP1	10759	protein glycosylation	GO:0006486	biological process	6	15	0.1868	0.2094	0.1604	0.5221	0.04192	0.1181	0.2957	0.1048	0.4181	0.09333	0.2757
154	28146	SERP1	10759	endoplasmic reticulum unfolded protein response	GO:0030968	biological process	6	6	0.2138	0.2052	0.143	0.479	0.1675	0.05261	0.8687	0.04114	1.023	0.01942	1.053
155	59058	BHLHE22	11963	sequence-specific double-stranded DNA binding	GO:1990837	molecular function	6	18	0.07366	0.04944	0.02455	0.799	0.01053	0.06706	0.08091	0.0349	0.07004	0.02033	0.02966
156	59058	BHLHE22	11963	DNA-binding transcription factor activity, RNA polymerase II-specific	GO:0000981	molecular function	6	18	0.07407	0.04944	0.02766	0.7833	0.01242	0.06699	0.08191	0.0349	0.07004	0.02209	0.03463
157	59058	BHLHE22	11963	regulation of transcription by RNA polymerase II	GO:0006357	biological process	6	47	0.07686	0.04944	0.03278	0.7606	0.01521	0.06659	0.08871	0.0349	0.07004	0.02483	0.04328
158	59058	BHLHE22	11963	RNA polymerase II cis-regulatory region sequence-specific DNA binding	GO:0000978	molecular function	6	27	0.08218	0.04944	0.041	0.731	0.0188	0.06723	0.1005	0.0349	0.07004	0.02922	0.05752
159	59058	BHLHE22	11963	nucleus	GO:0005634	cellular component	6	82	0.08654	0.05055	0.04757	0.7115	0.01171	0.07397	0.1012	0.03642	0.07017	0.03858	0.05866
160	59058	BHLHE22	11963	neuron differentiation	GO:0030182	biological process	6	18	0.09712	0.06431	0.04609	0.7082	0.07191	0.05166	0.1826	0.02711	0.1525	0.01398	0.152
161	100037258	DNAJC3	9439	chaperone binding	GO:0051087	molecular function	9	2	0.07306	0.03312	0.006296	0.9253	0.01142	0.06751	0.07907	0.01768	0.06202	0.003564	0.01112
162	100037258	DNAJC3	9439	extracellular vesicle	GO:1903561	cellular component	9	9	0.07306	0.03312	0.00732	0.9082	0.02026	0.06751	0.07907	0.01768	0.06202	0.002414	0.0222
163	100037258	DNAJC3	9439	misfolded protein binding	GO:0051787	molecular function	9	3	0.07306	0.04677	0.01747	0.8445	0.01763	0.06751	0.07907	0.03674	0.05954	0.01262	0.02418
164	100037258	DNAJC3	9439	protein folding in endoplasmic reticulum	GO:0034975	biological process	9	2	0.08982	0.0651	0.03112	0.7669	0.06471	0.06363	0.1268	0.0287	0.1477	0.0101	0.09585
165	100037258	DNAJC3	9439	endoplasmic reticulum	GO:0005783	cellular component	9	25	0.09168	0.08058	0.05106	0.7009	0.02885	0.07149	0.1176	0.03988	0.1628	0.03055	0.08533
166	100037258	DNAJC3	9439	extracellular exosome	GO:0070062	cellular component	9	51	0.1003	0.08416	0.05845	0.6814	0.03865	0.07362	0.1368	0.03929	0.1803	0.02955	0.1156
167	100037258	DNAJC3	9439	negative regulation of endoplasmic reticulum stress-induced eIF2 alpha phosphorylation	GO:1903912	biological process	9	4	0.1092	0.08841	0.05609	0.6818	0.07109	0.06325	0.1887	0.03404	0.2296	0.01728	0.1821
168	100037258	DNAJC3	9439	membrane	GO:0016020	cellular component	9	56	0.1407	0.1149	0.1021	0.5944	0.0569	0.07944	0.2493	0.04648	0.2839	0.04132	0.2524
169	100037258	DNAJC3	9439	negative regulation of apoptotic process	GO:0043066	biological process	9	30	0.214	0.1908	0.1908	0.4929	0.0277	0.1566	0.2925	0.1337	0.2724	0.1337	0.2724
170	77113	KLHL2	6353	actin cytoskeleton	GO:0015629	cellular component	4	15	0.07306	0.03685	0.01303	0.8775	0.01717	0.06751	0.07907	0.03029	0.04484	0.009028	0.01882
171	77113	KLHL2	6353	actin binding	GO:0003779	molecular function	4	12	0.07306	0.03685	0.01843	0.8389	0.01169	0.06751	0.07907	0.03029	0.04484	0.01514	0.02242
172	77113	KLHL2	6353	identical protein binding	GO:0042802	molecular function	4	33	0.07798	0.04515	0.03386	0.7565	0.01649	0.06791	0.08953	0.03344	0.06097	0.02508	0.04573
173	77113	KLHL2	6353	protein binding	GO:0005515	molecular function	4	344	0.1017	0.06646	0.06646	0.665	0.01904	0.08111	0.1276	0.0483	0.09146	0.0483	0.09146
174	70356	ST13	11343	heat shock protein binding	GO:0031072	molecular function	16	5	0.07306	0.01052	0.002391	0.9522	0.01106	0.06751	0.07907	0.003493	0.03171	0.0006985	0.008186
175	70356	ST13	11343	chaperone cofactor-dependent protein refolding	GO:0051085	biological process	16	3	0.07306	0.01754	0.004912	0.9308	0.01419	0.06751	0.07907	0.008415	0.03657	0.001692	0.01426
176	70356	ST13	11343	extracellular exosome	GO:0070062	cellular component	16	51	0.07575	0.039	0.02554	0.795	0.0276	0.06541	0.08772	0.02436	0.06244	0.01558	0.04187
177	70356	ST13	11343	cytosol	GO:0005829	cellular component	16	63	0.07811	0.039	0.02731	0.7855	0.03607	0.06357	0.09598	0.02436	0.06244	0.01432	0.05209
178	70356	ST13	11343	protein binding	GO:0005515	molecular function	16	344	0.084	0.04395	0.03892	0.7369	0.03787	0.06126	0.1152	0.02524	0.07651	0.01986	0.07627
179	70356	ST13	11343	protein-containing complex assembly	GO:0065003	biological process	16	46	0.1634	0.1344	0.1067	0.5753	0.09298	0.07341	0.3635	0.04991	0.3618	0.02598	0.4378
180	19654	RBM6	9903	nucleus	GO:0005634	cellular component	6	82	0.08843	0.08126	0.04992	0.7051	0.01163	0.0846	0.09244	0.04813	0.1372	0.04063	0.06133
181	19654	RBM6	9903	protein binding	GO:0005515	molecular function	6	344	0.09089	0.08126	0.04987	0.7038	0.03332	0.07091	0.1165	0.04813	0.1372	0.02806	0.08865
182	19654	RBM6	9903	RNA binding	GO:0003723	molecular function	6	50	0.09344	0.08126	0.05178	0.6974	0.04088	0.06683	0.1307	0.04813	0.1372	0.02565	0.1045
183	19654	RBM6	9903	mRNA splicing, via spliceosome	GO:0000398	biological process	6	7	0.3437	0.3225	0.3225	0.3747	0.0631	0.1877	0.6293	0.1656	0.6281	0.1656	0.6281
184	67448	PLXDC2	21013	protein binding	GO:0005515	molecular function	2	344	0.0783	0.0353	0.0353	0.7508	0.01509	0.06801	0.09014	0.02685	0.04641	0.02685	0.04641
185	19229	PTK2B	9612	positive regulation of protein kinase activity	GO:0045860	biological process	51	11	0.07306	0.04822	0.005838	0.9265	0.01441	0.06751	0.07907	0.04301	0.05406	0.0029	0.01175
186	19229	PTK2B	9612	tumor necrosis factor-mediated signaling pathway	GO:0033209	biological process	51	3	0.07306	0.04822	0.0069	0.9238	0.006698	0.06751	0.07907	0.04301	0.05406	0.004763	0.009997
187	19229	PTK2B	9612	positive regulation of ERK1 and ERK2 cascade	GO:0070374	biological process	51	8	0.07306	0.04822	0.007419	0.9208	0.005976	0.06751	0.07907	0.04301	0.05406	0.005438	0.01012
188	19229	PTK2B	9612	activation of Janus kinase activity	GO:0042976	biological process	51	3	0.07306	0.04822	0.00687	0.9166	0.01867	0.06751	0.07907	0.04301	0.05406	0.00324	0.01457
189	19229	PTK2B	9612	signaling receptor binding	GO:0005102	molecular function	51	68	0.07306	0.04822	0.008328	0.9127	0.01016	0.06751	0.07907	0.04301	0.05406	0.005254	0.0132
190	19229	PTK2B	9612	protein C-terminus binding	GO:0008022	molecular function	51	4	0.07306	0.05084	0.01004	0.9015	0.009574	0.06751	0.07907	0.04476	0.05775	0.00705	0.0143
191	19229	PTK2B	9612	positive regulation of peptidyl-tyrosine phosphorylation	GO:0050731	biological process	51	11	0.07306	0.05084	0.01184	0.887	0.01353	0.06751	0.07907	0.04476	0.05775	0.008071	0.01736
192	19229	PTK2B	9612	protein tyrosine kinase activity	GO:0004713	molecular function	51	4	0.07306	0.05084	0.01258	0.8834	0.01089	0.06751	0.07907	0.04476	0.05775	0.009375	0.01688
193	19229	PTK2B	9612	peptidyl-tyrosine autophosphorylation	GO:0038083	biological process	51	3	0.07306	0.05084	0.01282	0.8803	0.01387	0.06751	0.07907	0.04476	0.05775	0.00924	0.01778
194	19229	PTK2B	9612	integrin-mediated signaling pathway	GO:0007229	biological process	51	5	0.07306	0.05317	0.01232	0.8828	0.01576	0.06751	0.07907	0.05109	0.05533	0.008371	0.01813
195	19229	PTK2B	9612	cell surface receptor signaling pathway	GO:0007166	biological process	51	31	0.07306	0.05317	0.01705	0.8486	0.01298	0.06751	0.07907	0.05109	0.05533	0.01335	0.02177
196	19229	PTK2B	9612	non-membrane spanning protein tyrosine kinase activity	GO:0004715	molecular function	51	3	0.07306	0.05441	0.01687	0.8517	0.005988	0.06751	0.07907	0.05044	0.05868	0.01524	0.01866
197	19229	PTK2B	9612	vascular endothelial growth factor receptor signaling pathway	GO:0048010	biological process	51	7	0.07306	0.05469	0.02021	0.8258	0.006051	0.06751	0.07907	0.05023	0.05956	0.01828	0.02235
198	19229	PTK2B	9612	peptidyl-tyrosine phosphorylation	GO:0018108	biological process	51	7	0.07354	0.06121	0.02531	0.7949	0.006689	0.06809	0.07942	0.05295	0.07075	0.02245	0.02853
199	19229	PTK2B	9612	positive regulation of endothelial cell migration	GO:0010595	biological process	51	8	0.07384	0.06085	0.01835	0.838	0.03196	0.06822	0.07994	0.04555	0.08128	0.01031	0.03266
200	19229	PTK2B	9612	transmembrane receptor protein tyrosine kinase signaling pathway	GO:0007169	biological process	51	20	0.07454	0.06459	0.02861	0.7785	0.00684	0.07049	0.07883	0.05156	0.08091	0.02531	0.03235
201	19229	PTK2B	9612	negative regulation of cell population proliferation	GO:0008285	biological process	51	34	0.075	0.06459	0.02977	0.7735	0.007447	0.0715	0.07866	0.05156	0.08091	0.02598	0.03412
202	19229	PTK2B	9612	regulation of cell adhesion	GO:0030155	biological process	51	11	0.07619	0.06325	0.01904	0.8246	0.04736	0.06845	0.08481	0.04391	0.0911	0.00726	0.04991
203	19229	PTK2B	9612	positive regulation of cell-matrix adhesion	GO:0001954	biological process	51	7	0.07625	0.06325	0.02403	0.8036	0.03592	0.06844	0.08495	0.04391	0.0911	0.0127	0.04546
204	19229	PTK2B	9612	endothelin receptor signaling pathway	GO:0086100	biological process	51	3	0.07946	0.07351	0.03834	0.7403	0.008451	0.07157	0.08824	0.0593	0.09112	0.03276	0.04487
205	19229	PTK2B	9612	positive regulation of JNK cascade	GO:0046330	biological process	51	4	0.08359	0.07513	0.0431	0.7241	0.02002	0.07121	0.09813	0.05984	0.09432	0.02998	0.06195
206	19229	PTK2B	9612	positive regulation of neuron projection development	GO:0010976	biological process	51	7	0.08384	0.07013	0.03843	0.7396	0.0336	0.07387	0.09515	0.04939	0.09958	0.02097	0.07043
207	19229	PTK2B	9612	focal adhesion	GO:0005925	cellular component	51	23	0.08622	0.07958	0.04689	0.7135	0.01454	0.0727	0.1023	0.06894	0.09186	0.03626	0.06065
208	19229	PTK2B	9612	lamellipodium	GO:0030027	cellular component	51	5	0.08645	0.0758	0.04713	0.7124	0.01852	0.07672	0.09742	0.06043	0.09508	0.03404	0.06527
209	19229	PTK2B	9612	dendritic spine	GO:0043197	cellular component	51	5	0.08844	0.07818	0.05057	0.703	0.008506	0.08113	0.09641	0.06493	0.09412	0.04334	0.059
210	19229	PTK2B	9612	positive regulation of cell population proliferation	GO:0008284	biological process	51	41	0.08892	0.07847	0.05023	0.7041	0.01533	0.08387	0.09427	0.06325	0.09736	0.0382	0.06605
211	19229	PTK2B	9612	positive regulation of actin filament polymerization	GO:0030838	biological process	51	10	0.09174	0.07298	0.04511	0.7178	0.04232	0.07884	0.1068	0.05062	0.1052	0.0212	0.096
212	19229	PTK2B	9612	regulation of ubiquitin-dependent protein catabolic process	GO:2000058	biological process	51	5	0.0946	0.08085	0.05766	0.6856	0.003872	0.09204	0.09723	0.06851	0.09541	0.05375	0.06187
213	19229	PTK2B	9612	positive regulation of cell migration	GO:0030335	biological process	51	27	0.09572	0.07771	0.04923	0.7021	0.05574	0.06081	0.1506	0.04397	0.1373	0.01923	0.126
214	19229	PTK2B	9612	cell differentiation	GO:0030154	biological process	51	86	0.09656	0.08091	0.05867	0.6827	0.0154	0.08995	0.1037	0.06745	0.09707	0.04469	0.07701
215	19229	PTK2B	9612	regulation of cell shape	GO:0008360	biological process	51	10	0.09881	0.0858	0.06272	0.6734	0.01197	0.08472	0.1153	0.07773	0.09472	0.05101	0.07712
216	19229	PTK2B	9612	innate immune response	GO:0045087	biological process	51	18	0.1025	0.09075	0.06245	0.6712	0.04012	0.07217	0.1455	0.06288	0.131	0.03205	0.1217
217	19229	PTK2B	9612	extrinsic component of cytoplasmic side of plasma membrane	GO:0031234	cellular component	51	4	0.1077	0.08925	0.07058	0.655	0.03063	0.08279	0.1401	0.06204	0.1284	0.04277	0.1165
218	19229	PTK2B	9612	negative regulation of potassium ion transport	GO:0043267	biological process	51	5	0.1108	0.09121	0.07718	0.6439	0.01593	0.09266	0.1324	0.07925	0.105	0.05923	0.1006
219	19229	PTK2B	9612	angiogenesis	GO:0001525	biological process	51	15	0.1113	0.08996	0.07778	0.643	0.007298	0.1036	0.1197	0.08027	0.1008	0.06906	0.0876
220	19229	PTK2B	9612	perinuclear region of cytoplasm	GO:0048471	cellular component	51	14	0.1145	0.09366	0.0814	0.6363	0.006273	0.1041	0.126	0.08602	0.102	0.07355	0.09009
221	19229	PTK2B	9612	negative regulation of apoptotic process	GO:0043066	biological process	51	30	0.1191	0.0981	0.08666	0.6268	0.01211	0.1012	0.1402	0.08944	0.1076	0.07152	0.105
222	19229	PTK2B	9612	nucleus	GO:0005634	cellular component	51	82	0.1206	0.09904	0.08841	0.6238	0.0122	0.1106	0.1315	0.08436	0.1163	0.07262	0.1076
223	19229	PTK2B	9612	protein binding	GO:0005515	molecular function	51	344	0.1213	0.09839	0.08906	0.6229	0.01034	0.1106	0.133	0.08522	0.1136	0.07565	0.1048
224	19229	PTK2B	9612	epidermal growth factor receptor signaling pathway	GO:0007173	biological process	51	10	0.1235	0.101	0.08921	0.6212	0.02584	0.09759	0.1564	0.07337	0.139	0.05962	0.1335
225	19229	PTK2B	9612	negative regulation of myeloid cell differentiation	GO:0045638	biological process	51	7	0.1247	0.1032	0.08891	0.6199	0.03823	0.0853	0.1823	0.06536	0.1631	0.04965	0.1592
226	19229	PTK2B	9612	cellular response to retinoic acid	GO:0071300	biological process	51	4	0.1983	0.1715	0.1557	0.5172	0.0735	0.09804	0.401	0.07175	0.4097	0.05397	0.4493
227	77697	MMAB	19331	cobalamin binding	GO:0031419	molecular function	3	3	0.2474	0.3719	0.2204	0.4571	0.06233	0.1338	0.4573	0.2045	0.6764	0.1096	0.4434
228	77697	MMAB	19331	protein binding	GO:0005515	molecular function	3	344	0.3004	0.3719	0.2813	0.4147	0.02602	0.2294	0.3933	0.2045	0.6764	0.2093	0.3781
229	77697	MMAB	19331	cob(I)yrinic acid a,c-diamide adenosyltransferase activity	GO:0008817	molecular function	3	2	0.3896	0.4153	0.3666	0.3032	0.1268	0.165	0.9202	0.1849	0.9324	0.1463	0.9185
230	22019	TPP2	12016	nuclear body	GO:0016604	cellular component	7	20	0.07306	0.03159	0.01518	0.8602	0.01903	0.06751	0.07907	0.01998	0.04995	0.01011	0.02279
231	22019	TPP2	12016	identical protein binding	GO:0042802	molecular function	7	33	0.07366	0.03159	0.01937	0.8281	0.02857	0.0689	0.07876	0.01998	0.04995	0.01121	0.03347
232	22019	TPP2	12016	cytosol	GO:0005829	cellular component	7	63	0.07429	0.03159	0.02304	0.8079	0.0265	0.06973	0.07916	0.01998	0.04995	0.01442	0.03684
233	22019	TPP2	12016	nucleoplasm	GO:0005654	cellular component	7	61	0.07484	0.03159	0.02353	0.8048	0.02982	0.06956	0.08052	0.01998	0.04995	0.01376	0.04022
234	22019	TPP2	12016	protein binding	GO:0005515	molecular function	7	344	0.07666	0.03159	0.02858	0.7798	0.02534	0.07189	0.08174	0.01998	0.04995	0.0182	0.04488
235	22019	TPP2	12016	tripeptidyl-peptidase activity	GO:0008240	molecular function	7	2	0.08251	0.03557	0.03557	0.7508	0.0338	0.06856	0.09931	0.01943	0.06511	0.01943	0.06511
236	101809	SPRED3	31041	inactivation of MAPK activity	GO:0000188	biological process	6	5	0.08287	0.07695	0.04281	0.7259	0.007498	0.07425	0.09249	0.05127	0.1155	0.0376	0.04874
237	101809	SPRED3	31041	regulation of protein deacetylation	GO:0090311	biological process	6	5	0.08641	0.07695	0.0474	0.712	0.01316	0.07349	0.1016	0.05127	0.1155	0.03753	0.05986
238	101809	SPRED3	31041	positive regulation of DNA damage response, signal transduction by p53 class mediator	GO:0043517	biological process	6	5	0.09337	0.07695	0.05507	0.6908	0.0263	0.07347	0.1187	0.05127	0.1155	0.03461	0.08761
239	101809	SPRED3	31041	negative regulation of peptidyl-threonine phosphorylation	GO:0010801	biological process	6	3	0.09845	0.07695	0.06156	0.6755	0.02346	0.07904	0.1226	0.05127	0.1155	0.04102	0.0924
240	101809	SPRED3	31041	protein kinase binding	GO:0019901	molecular function	6	22	0.1651	0.1389	0.1389	0.5519	0.001653	0.1606	0.1697	0.1356	0.1422	0.1356	0.1422
241	58869	PEX5L	30024	peroxisome matrix targeting signal-1 binding	GO:0005052	molecular function	7	2	0.07936	0.1738	0.03073	0.7692	0.03455	0.06263	0.1006	0.09946	0.3037	0.01647	0.05734
242	58869	PEX5L	30024	peroxisome targeting sequence binding	GO:0000268	molecular function	7	5	0.1065	0.1751	0.07022	0.6555	0.03076	0.0764	0.1486	0.1004	0.3055	0.04221	0.1168
243	58869	PEX5L	30024	small GTPase binding	GO:0031267	molecular function	7	3	0.111	0.1751	0.07505	0.6457	0.03408	0.07691	0.1601	0.1004	0.3055	0.04303	0.1309
244	58869	PEX5L	30024	protein import into peroxisome matrix, docking	GO:0016560	biological process	7	2	0.2021	0.2661	0.1758	0.503	0.05276	0.1149	0.3557	0.1563	0.4531	0.09139	0.3381
245	58869	PEX5L	30024	receptor complex	GO:0043235	cellular component	7	29	0.2348	0.2668	0.2109	0.4696	0.04894	0.1405	0.3923	0.1568	0.4538	0.117	0.38
246	58869	PEX5L	30024	cytosol	GO:0005829	cellular component	7	63	0.2645	0.3024	0.2439	0.4419	0.04171	0.1724	0.4056	0.2052	0.4457	0.1522	0.391
247	58869	PEX5L	30024	peroxisomal membrane	GO:0005778	cellular component	7	4	0.3823	0.3676	0.3676	0.3485	0.04705	0.2532	0.5771	0.2378	0.5681	0.2378	0.5681
248	108168164	ATP8A2	13533	ATPase activity	GO:0016887	molecular function	9	21	0.08134	0.1422	0.04007	0.7342	0.01735	0.07136	0.09271	0.1121	0.1803	0.02924	0.05491
249	108168164	ATP8A2	13533	ATPase-coupled intramembrane lipid transporter activity	GO:0140326	molecular function	9	5	0.08466	0.1422	0.03793	0.74	0.04186	0.06436	0.1114	0.1121	0.1803	0.01806	0.07967
250	108168164	ATP8A2	13533	plasma membrane	GO:0005886	cellular component	9	72	0.09612	0.1464	0.06014	0.6792	0.01289	0.08108	0.1139	0.1198	0.179	0.04821	0.07502
251	108168164	ATP8A2	13533	Golgi apparatus	GO:0005794	cellular component	9	20	0.1285	0.1464	0.09801	0.6082	0.006861	0.1148	0.1439	0.1198	0.179	0.08808	0.1091
252	108168164	ATP8A2	13533	phospholipid translocation	GO:0045332	biological process	9	6	0.1337	0.1464	0.102	0.6014	0.01913	0.1129	0.1584	0.1198	0.179	0.07626	0.1365
253	108168164	ATP8A2	13533	protein binding	GO:0005515	molecular function	9	344	0.1504	0.1488	0.1207	0.5742	0.02211	0.1196	0.1892	0.118	0.1876	0.08767	0.1661
254	108168164	ATP8A2	13533	nucleoplasm	GO:0005654	cellular component	9	61	0.1571	0.1494	0.1298	0.5631	0.008697	0.1406	0.1755	0.1239	0.18	0.1144	0.1472
255	108168164	ATP8A2	13533	neuron development	GO:0048666	biological process	9	11	0.1939	0.1747	0.1671	0.5172	0.029	0.1457	0.258	0.1282	0.2379	0.1136	0.2457
256	17475	MPDZ	7208	protein C-terminus binding	GO:0008022	molecular function	6	4	0.07306	0.0177	0.006022	0.926	0.01162	0.06751	0.07907	0.01085	0.02888	0.002783	0.01303
257	17475	MPDZ	7208	apicolateral plasma membrane	GO:0016327	cellular component	6	2	0.07306	0.02259	0.01404	0.8745	0.002609	0.06751	0.07907	0.01936	0.02635	0.01324	0.01489
258	17475	MPDZ	7208	cytoplasm	GO:0005737	cellular component	6	82	0.07306	0.02259	0.02094	0.8211	0.005423	0.06751	0.07907	0.01936	0.02635	0.01913	0.02292
259	17475	MPDZ	7208	protein binding	GO:0005515	molecular function	6	344	0.07306	0.02259	0.0213	0.8185	0.01287	0.06751	0.07907	0.01936	0.02635	0.01704	0.02662
260	16412	ITGB1	6153	cell adhesion molecule binding	GO:0050839	molecular function	76	8	0.07306	0.03294	0.002993	0.9514	0.00424	0.06751	0.07907	0.02824	0.03843	0.001915	0.004677
261	16412	ITGB1	6153	collagen binding involved in cell-matrix adhesion	GO:0098639	molecular function	76	3	0.07306	0.03294	0.003626	0.9464	0.00506	0.06751	0.07907	0.02824	0.03843	0.002401	0.005475
262	16412	ITGB1	6153	integrin alpha2-beta1 complex	GO:0034666	cellular component	76	2	0.07306	0.03294	0.004767	0.9392	0.002041	0.06751	0.07907	0.02824	0.03843	0.004127	0.005506
263	16412	ITGB1	6153	integrin alpha1-beta1 complex	GO:0034665	cellular component	76	2	0.07306	0.03294	0.004839	0.9386	0.002158	0.06751	0.07907	0.02824	0.03843	0.004188	0.005592
264	16412	ITGB1	6153	integrin alpha5-beta1 complex	GO:0034674	cellular component	76	2	0.07306	0.03294	0.004992	0.9374	0.003716	0.06751	0.07907	0.02824	0.03843	0.003904	0.006383
265	16412	ITGB1	6153	integrin alpha10-beta1 complex	GO:0034680	cellular component	76	2	0.07306	0.03294	0.005062	0.937	0.002576	0.06751	0.07907	0.02824	0.03843	0.00427	0.006
266	16412	ITGB1	6153	integrin alpha11-beta1 complex	GO:0034681	cellular component	76	2	0.07306	0.03294	0.005188	0.9361	0.002917	0.06751	0.07907	0.02824	0.03843	0.004297	0.006264
267	16412	ITGB1	6153	integrin alpha3-beta1 complex	GO:0034667	cellular component	76	2	0.07306	0.03294	0.005627	0.9333	0.002222	0.06751	0.07907	0.02824	0.03843	0.004899	0.006464
268	16412	ITGB1	6153	calcium-independent cell-matrix adhesion	GO:0007161	biological process	76	2	0.07306	0.03314	0.004554	0.9386	0.007592	0.06751	0.07907	0.02832	0.03877	0.002458	0.008436
269	16412	ITGB1	6153	integrin binding	GO:0005178	molecular function	76	10	0.07306	0.03357	0.006271	0.9228	0.01417	0.06751	0.07907	0.02841	0.03967	0.002821	0.01394
270	16412	ITGB1	6153	laminin binding	GO:0043236	molecular function	76	6	0.07306	0.03414	0.008758	0.9077	0.01376	0.06751	0.07907	0.03121	0.03735	0.005163	0.01486
271	16412	ITGB1	6153	negative regulation of anoikis	GO:2000811	biological process	76	3	0.07306	0.03434	0.008197	0.916	0.004814	0.06751	0.07907	0.03135	0.03761	0.006563	0.01024
272	16412	ITGB1	6153	fibronectin binding	GO:0001968	molecular function	76	3	0.07306	0.03436	0.007662	0.9183	0.007686	0.06751	0.07907	0.02825	0.04181	0.005323	0.01103
273	16412	ITGB1	6153	cell-cell adhesion mediated by integrin	GO:0033631	biological process	76	3	0.07306	0.03453	0.009542	0.9032	0.01317	0.06751	0.07907	0.02819	0.0423	0.006043	0.01507
274	16412	ITGB1	6153	protein tyrosine kinase binding	GO:1990782	molecular function	76	3	0.07306	0.03478	0.009631	0.9038	0.01007	0.06751	0.07907	0.03155	0.03833	0.006487	0.0143
275	16412	ITGB1	6153	protein-containing complex binding	GO:0044877	molecular function	76	75	0.07306	0.03479	0.01158	0.8907	0.009549	0.06751	0.07907	0.03155	0.03835	0.008644	0.01551
276	16412	ITGB1	6153	regulation of collagen catabolic process	GO:0010710	biological process	76	5	0.07306	0.035	0.0109	0.8952	0.01068	0.06751	0.07907	0.02929	0.04182	0.007728	0.01538
277	16412	ITGB1	6153	cell adhesion mediated by integrin	GO:0033627	biological process	76	5	0.07306	0.03506	0.01038	0.8904	0.02255	0.06751	0.07907	0.02798	0.04395	0.005305	0.02031
278	16412	ITGB1	6153	cell-substrate adhesion	GO:0031589	biological process	76	11	0.07306	0.03526	0.01327	0.874	0.01672	0.06751	0.07907	0.02992	0.04156	0.008539	0.02062
279	16412	ITGB1	6153	cell-matrix adhesion	GO:0007160	biological process	76	12	0.07306	0.03578	0.01085	0.8985	0.004053	0.06751	0.07907	0.03116	0.04107	0.009564	0.01231
280	16412	ITGB1	6153	CD40 signaling pathway	GO:0023035	biological process	76	2	0.07306	0.03578	0.01297	0.8815	0.00816	0.06751	0.07907	0.03117	0.04107	0.01061	0.01586
281	16412	ITGB1	6153	integrin-mediated signaling pathway	GO:0007229	biological process	76	5	0.07306	0.03578	0.01666	0.8504	0.01789	0.06751	0.07907	0.03117	0.04107	0.01193	0.02326
282	16412	ITGB1	6153	C-X3-C chemokine binding	GO:0019960	molecular function	76	3	0.07306	0.03578	0.01701	0.849	0.01378	0.06751	0.07907	0.03117	0.04107	0.0133	0.02176
283	16412	ITGB1	6153	positive regulation of fibroblast migration	GO:0010763	biological process	76	4	0.07306	0.03583	0.01389	0.8756	0.004719	0.06751	0.07907	0.03128	0.04103	0.01247	0.01547
284	16412	ITGB1	6153	cadherin binding	GO:0045296	molecular function	76	10	0.07306	0.03636	0.01544	0.8633	0.004105	0.06751	0.07907	0.03257	0.0406	0.01424	0.01674
285	16412	ITGB1	6153	positive regulation of angiogenesis	GO:0045766	biological process	76	10	0.07306	0.03639	0.01791	0.8408	0.0177	0.06751	0.07907	0.03081	0.04297	0.01289	0.0249
286	16412	ITGB1	6153	integrin complex	GO:0008305	cellular component	76	28	0.07306	0.0372	0.02008	0.8272	0.01206	0.06751	0.07907	0.03199	0.04325	0.01633	0.02469
287	16412	ITGB1	6153	protease binding	GO:0002020	molecular function	76	9	0.07306	0.03768	0.02018	0.8262	0.005777	0.06751	0.07907	0.03379	0.04202	0.01837	0.02217
288	16412	ITGB1	6153	sarcolemma	GO:0042383	cellular component	76	5	0.07306	0.03796	0.01987	0.8285	0.01009	0.06751	0.07907	0.03356	0.04294	0.01667	0.02368
289	16412	ITGB1	6153	mesodermal cell differentiation	GO:0048333	biological process	76	8	0.07306	0.03908	0.02275	0.8095	0.005881	0.06751	0.07907	0.03623	0.04214	0.02055	0.02519
290	16412	ITGB1	6153	cell migration	GO:0016477	biological process	76	44	0.07308	0.04009	0.02432	0.8001	0.006096	0.0675	0.07911	0.03541	0.0454	0.02179	0.02715
291	16412	ITGB1	6153	heterotypic cell-cell adhesion	GO:0034113	biological process	76	8	0.07399	0.03854	0.01675	0.8397	0.03896	0.0668	0.08195	0.02732	0.05437	0.007175	0.03909
292	16412	ITGB1	6153	membrane raft	GO:0045121	cellular component	76	6	0.074	0.04031	0.02213	0.8139	0.0177	0.06964	0.07864	0.03624	0.04484	0.01622	0.03018
293	16412	ITGB1	6153	leukocyte cell-cell adhesion	GO:0007159	biological process	76	6	0.07436	0.04091	0.02487	0.7982	0.023	0.06651	0.08313	0.03111	0.05379	0.01656	0.03734
294	16412	ITGB1	6153	filopodium	GO:0030175	cellular component	76	6	0.07523	0.04263	0.0266	0.789	0.01887	0.07028	0.08053	0.03576	0.05082	0.01905	0.03714
295	16412	ITGB1	6153	focal adhesion	GO:0005925	cellular component	76	23	0.07538	0.04369	0.02805	0.7819	0.02066	0.06926	0.08205	0.03493	0.05463	0.01949	0.04037
296	16412	ITGB1	6153	protein heterodimerization activity	GO:0046982	molecular function	76	6	0.07573	0.04507	0.03201	0.7637	0.006209	0.07178	0.07991	0.0409	0.04967	0.02857	0.03586
297	16412	ITGB1	6153	leukocyte tethering or rolling	GO:0050901	biological process	76	2	0.07586	0.04292	0.02953	0.7749	0.02045	0.06597	0.08723	0.03423	0.05381	0.02035	0.04285
298	16412	ITGB1	6153	ruffle membrane	GO:0032587	cellular component	76	7	0.07613	0.04154	0.02783	0.7833	0.02955	0.06601	0.0878	0.03156	0.05469	0.01646	0.04707
299	16412	ITGB1	6153	positive regulation of wound healing	GO:0090303	biological process	76	6	0.07682	0.04554	0.03301	0.76	0.01891	0.06844	0.08621	0.03683	0.05631	0.02344	0.04649
300	16412	ITGB1	6153	neuromuscular junction	GO:0031594	cellular component	76	9	0.07685	0.04369	0.02902	0.7778	0.02567	0.06804	0.0868	0.03493	0.05463	0.01835	0.0459
301	16412	ITGB1	6153	plasma membrane	GO:0005886	cellular component	76	72	0.07737	0.04369	0.03009	0.7726	0.02577	0.06761	0.08855	0.03493	0.05463	0.01901	0.04764
302	16412	ITGB1	6153	receptor complex	GO:0043235	cellular component	76	29	0.0777	0.04589	0.0352	0.7514	0.009764	0.06909	0.08738	0.03936	0.05352	0.02939	0.04216
303	16412	ITGB1	6153	positive regulation of protein localization to plasma membrane	GO:1903078	biological process	76	7	0.07895	0.04628	0.03678	0.7454	0.01256	0.06859	0.09087	0.03905	0.05486	0.02933	0.04614
304	16412	ITGB1	6153	establishment of mitotic spindle orientation	GO:0000132	biological process	76	4	0.08015	0.04731	0.03741	0.7434	0.01418	0.07114	0.0903	0.04017	0.05573	0.02881	0.04857
305	16412	ITGB1	6153	cell adhesion	GO:0007155	biological process	76	12	0.08036	0.048	0.03622	0.7472	0.02632	0.06374	0.1013	0.0353	0.06529	0.02248	0.05838
306	16412	ITGB1	6153	extracellular exosome	GO:0070062	cellular component	76	51	0.08115	0.04928	0.03859	0.7392	0.01762	0.07297	0.09024	0.04053	0.05991	0.02799	0.05321
307	16412	ITGB1	6153	cell surface	GO:0009986	cellular component	76	19	0.08189	0.04925	0.04109	0.7309	0.00927	0.07557	0.08873	0.04208	0.05765	0.03476	0.04857
308	16412	ITGB1	6153	actin binding	GO:0003779	molecular function	76	12	0.08443	0.05127	0.0437	0.7227	0.01467	0.07572	0.09416	0.04171	0.06302	0.03356	0.05691
309	16412	ITGB1	6153	positive regulation of protein kinase B signaling	GO:0051897	biological process	76	5	0.08712	0.05482	0.04767	0.7105	0.02437	0.0675	0.1124	0.03899	0.07709	0.03107	0.07313
310	16412	ITGB1	6153	protein binding	GO:0005515	molecular function	76	344	0.09249	0.05953	0.0546	0.6926	0.008403	0.08429	0.1015	0.05238	0.06766	0.04698	0.06344
311	16412	ITGB1	6153	perinuclear region of cytoplasm	GO:0048471	cellular component	76	14	0.09573	0.06328	0.05954	0.6802	0.01874	0.07659	0.1196	0.04804	0.08337	0.04309	0.08228
312	16412	ITGB1	6153	positive regulation of GTPase activity	GO:0043547	biological process	76	6	0.1001	0.06893	0.06397	0.6701	0.02109	0.0812	0.1234	0.05201	0.09134	0.04438	0.09221
313	16412	ITGB1	6153	membrane	GO:0016020	cellular component	76	56	0.1003	0.06692	0.06252	0.6732	0.02242	0.08096	0.1242	0.04834	0.09263	0.04269	0.09157
314	16412	ITGB1	6153	cytoplasm	GO:0005737	cellular component	76	82	0.1009	0.06803	0.06481	0.6692	0.009706	0.09093	0.1119	0.05871	0.07883	0.05502	0.07635
315	16412	ITGB1	6153	positive regulation of apoptotic process	GO:0043065	biological process	76	25	0.1059	0.07401	0.07165	0.6547	0.01243	0.09141	0.1227	0.06123	0.08945	0.05808	0.0884
316	16412	ITGB1	6153	positive regulation of signaling receptor activity	GO:2000273	biological process	76	21	0.1406	0.1011	0.09162	0.591	0.1102	0.04641	0.426	0.02496	0.4093	0.02053	0.4089
317	320878	MICAL2	24693	actin binding	GO:0003779	molecular function	7	12	0.1214	0.2426	0.08995	0.6214	0.001237	0.1158	0.1274	0.2144	0.2744	0.08807	0.09188
318	320878	MICAL2	24693	cytoskeleton organization	GO:0007010	biological process	7	15	0.1332	0.2426	0.1013	0.6021	0.02265	0.1081	0.1642	0.2144	0.2744	0.07198	0.1425
319	320878	MICAL2	24693	actin filament depolymerization	GO:0030042	biological process	7	6	0.1707	0.2426	0.1444	0.5437	0.02363	0.131	0.2224	0.2144	0.2744	0.1043	0.2
320	320878	MICAL2	24693	nucleus	GO:0005634	cellular component	7	82	0.1918	0.2426	0.1677	0.5184	0.01113	0.166	0.2215	0.2144	0.2744	0.1447	0.1942
321	320878	MICAL2	24693	protein binding	GO:0005515	molecular function	7	344	0.1986	0.2426	0.1749	0.5108	0.01134	0.1716	0.2298	0.2144	0.2744	0.1507	0.203
322	320878	MICAL2	24693	positive regulation of transcription via serum response element binding	GO:0010735	biological process	7	2	0.2356	0.2499	0.2142	0.4726	0.007119	0.2204	0.252	0.2296	0.272	0.1968	0.2331
323	320878	MICAL2	24693	oxidoreductase activity	GO:0016491	molecular function	7	88	0.6358	0.6295	0.6295	0.197	0.0234	0.5422	0.7455	0.5362	0.7392	0.5362	0.7392
324	21923	TNC	5318	focal adhesion	GO:0005925	cellular component	16	23	0.07308	0.05112	0.02372	0.8035	0.005957	0.0675	0.07911	0.04281	0.06105	0.0213	0.02641
325	21923	TNC	5318	response to wounding	GO:0009611	biological process	16	9	0.07323	0.05112	0.02209	0.8139	0.01261	0.06739	0.07959	0.04281	0.06105	0.01774	0.02752
326	21923	TNC	5318	collagen-containing extracellular matrix	GO:0062023	cellular component	16	21	0.07371	0.05112	0.02511	0.7964	0.01331	0.06702	0.08107	0.04281	0.06105	0.01981	0.03185
327	21923	TNC	5318	syndecan binding	GO:0045545	molecular function	16	2	0.07462	0.05112	0.02824	0.7802	0.005968	0.06912	0.08055	0.04281	0.06105	0.02535	0.03146
328	21923	TNC	5318	osteoblast differentiation	GO:0001649	biological process	16	2	0.07634	0.05181	0.03136	0.7667	0.01947	0.06627	0.08794	0.04404	0.06094	0.02202	0.04465
329	21923	TNC	5318	extracellular space	GO:0005615	cellular component	16	34	0.07824	0.05112	0.03242	0.762	0.02353	0.06688	0.09154	0.04281	0.06105	0.02119	0.04961
330	21923	TNC	5318	protein binding	GO:0005515	molecular function	16	344	0.0869	0.05484	0.04855	0.7084	0.00264	0.08297	0.09103	0.04847	0.06205	0.04628	0.05094
331	21923	TNC	5318	membrane	GO:0016020	cellular component	16	56	0.08755	0.05683	0.0491	0.7071	0.01353	0.07393	0.1037	0.04532	0.07125	0.03859	0.06247
332	21923	TNC	5318	extracellular region	GO:0005576	cellular component	16	16	0.09469	0.05994	0.05692	0.6866	0.02343	0.07397	0.1212	0.04327	0.08304	0.03801	0.08523
333	19242	PTN	9630	integrin binding	GO:0005178	molecular function	19	10	0.07306	0.1163	0.01671	0.8518	0.01008	0.06751	0.07907	0.07015	0.1929	0.01385	0.02016
334	19242	PTN	9630	integrin-mediated signaling pathway	GO:0007229	biological process	19	5	0.07595	0.1163	0.02432	0.8009	0.0364	0.06852	0.08418	0.07015	0.1929	0.01263	0.04682
335	19242	PTN	9630	protein kinase binding	GO:0019901	molecular function	19	22	0.0825	0.1163	0.04238	0.7267	0.01476	0.06915	0.09843	0.07015	0.1929	0.03244	0.05537
336	19242	PTN	9630	heparin binding	GO:0008201	molecular function	19	4	0.09002	0.1163	0.05083	0.7017	0.02455	0.07272	0.1114	0.07015	0.1929	0.03296	0.07841
337	19242	PTN	9630	protein binding	GO:0005515	molecular function	19	344	0.09125	0.1163	0.05217	0.698	0.02763	0.07174	0.1161	0.07015	0.1929	0.03186	0.08541
338	19242	PTN	9630	chondroitin sulfate binding	GO:0035374	molecular function	19	3	0.09945	0.1163	0.06251	0.6732	0.02679	0.07629	0.1296	0.07015	0.1929	0.03924	0.09958
339	19242	PTN	9630	positive regulation of oligodendrocyte differentiation	GO:0048714	biological process	19	3	0.0999	0.1293	0.06408	0.6702	0.0153	0.08297	0.1203	0.09598	0.1742	0.04921	0.08344
340	19242	PTN	9630	growth factor activity	GO:0008083	molecular function	19	2	0.1093	0.1172	0.07169	0.6512	0.04307	0.07207	0.1656	0.07017	0.1958	0.03444	0.1492
341	19242	PTN	9630	endoplasmic reticulum	GO:0005783	cellular component	19	25	0.1112	0.1226	0.07728	0.6425	0.02567	0.08493	0.1455	0.08013	0.1876	0.05008	0.1193
342	19242	PTN	9630	protein phosphatase inhibitor activity	GO:0004864	molecular function	19	4	0.1169	0.1182	0.08019	0.6339	0.04628	0.07415	0.1842	0.07018	0.1992	0.03695	0.174
343	19242	PTN	9630	positive regulation of cell population proliferation	GO:0008284	biological process	19	41	0.1332	0.1608	0.09941	0.603	0.03628	0.09189	0.193	0.1412	0.1831	0.058	0.1704
344	19242	PTN	9630	receptor clustering	GO:0043113	biological process	19	9	0.1332	0.1376	0.08495	0.6176	0.0776	0.06623	0.2681	0.0668	0.2836	0.02439	0.2958
345	19242	PTN	9630	extracellular space	GO:0005615	cellular component	19	34	0.1406	0.1408	0.1112	0.588	0.01786	0.115	0.1718	0.1131	0.1752	0.08471	0.1458
346	19242	PTN	9630	protein-containing complex	GO:0032991	cellular component	19	349	0.1522	0.1676	0.1189	0.5731	0.04272	0.09945	0.233	0.114	0.2465	0.06481	0.2181
347	19242	PTN	9630	extracellular region	GO:0005576	cellular component	19	16	0.2164	0.2103	0.1926	0.4911	0.02634	0.1622	0.2889	0.1563	0.2828	0.1371	0.2707
348	19242	PTN	9630	ossification involved in bone remodeling	GO:0043932	biological process	19	2	0.3624	0.3472	0.3472	0.3678	0.01866	0.3022	0.4346	0.287	0.42	0.287	0.42
349	269941	CHSY1	17198	glucuronosyl-N-acetylgalactosaminyl-proteoglycan 4-beta-N-acetylgalactosaminyltransferase activity	GO:0047238	molecular function	7	2	0.113	0.5189	0.0799	0.6387	0.01385	0.09421	0.1356	0.4228	0.6369	0.06376	0.1001
350	269941	CHSY1	17198	N-acetylgalactosaminyl-proteoglycan 3-beta-glucuronosyltransferase activity	GO:0050510	molecular function	7	2	0.2739	0.5189	0.2539	0.4331	0.04393	0.1752	0.4282	0.4228	0.6369	0.1554	0.4149
351	269941	CHSY1	17198	acetylgalactosaminyltransferase activity	GO:0008376	molecular function	7	14	0.3182	0.5189	0.3013	0.401	0.01225	0.2794	0.3624	0.4228	0.6369	0.2638	0.3442
352	269941	CHSY1	17198	chondroitin sulfate biosynthetic process	GO:0030206	biological process	7	4	0.328	0.5189	0.3117	0.3914	0.02904	0.2468	0.436	0.4228	0.6369	0.23	0.4223
353	269941	CHSY1	17198	extracellular region	GO:0005576	cellular component	7	16	0.4871	0.5189	0.4763	0.2828	0.03662	0.3683	0.6444	0.4228	0.6369	0.3557	0.638
354	269941	CHSY1	17198	membrane	GO:0016020	cellular component	7	56	0.492	0.5189	0.4811	0.2808	0.03301	0.3797	0.6376	0.4228	0.6369	0.3661	0.6323
355	269941	CHSY1	17198	negative regulation of ossification	GO:0030279	biological process	7	5	0.5875	0.6147	0.5789	0.2185	0.04819	0.418	0.8256	0.4701	0.8037	0.4077	0.822
356	217410	TRIB2	30809	mitogen-activated protein kinase kinase binding	GO:0031434	molecular function	7	2	0.092	0.1229	0.04258	0.7219	0.06159	0.05526	0.1532	0.05973	0.2529	0.01488	0.1218
357	217410	TRIB2	30809	negative regulation of interleukin-10 production	GO:0032693	biological process	7	3	0.1069	0.1241	0.0615	0.668	0.06567	0.05688	0.2009	0.0592	0.2601	0.02129	0.1777
358	217410	TRIB2	30809	nucleus	GO:0005634	cellular component	7	82	0.1185	0.1463	0.08504	0.6285	0.02503	0.09024	0.1555	0.07848	0.2727	0.05647	0.1281
359	217410	TRIB2	30809	regulation of MAP kinase activity	GO:0043405	biological process	7	7	0.1309	0.1425	0.08445	0.6108	0.09398	0.04996	0.3428	0.052	0.3903	0.02212	0.3224
360	217410	TRIB2	30809	protein binding	GO:0005515	molecular function	7	344	0.1361	0.151	0.1061	0.595	0.02002	0.1077	0.1719	0.0854	0.267	0.07778	0.1448
361	217410	TRIB2	30809	positive regulation of proteasomal ubiquitin-dependent protein catabolic process	GO:0032436	biological process	7	10	0.294	0.273	0.273	0.4097	0.07042	0.1525	0.5671	0.1338	0.557	0.1338	0.557
362	13026	PCYT1A	8754	CDP-choline pathway	GO:0006657	biological process	11	2	0.07306	0.02318	0.003229	0.9495	0.005172	0.06751	0.07907	0.01751	0.03068	0.002064	0.005052
363	13026	PCYT1A	8754	identical protein binding	GO:0042802	molecular function	11	33	0.07306	0.02521	0.009209	0.9062	0.0117	0.06751	0.07907	0.0195	0.03258	0.006153	0.01378
364	13026	PCYT1A	8754	endoplasmic reticulum	GO:0005783	cellular component	11	25	0.07306	0.02521	0.01098	0.8905	0.0165	0.06751	0.07907	0.0195	0.03258	0.006484	0.01861
365	13026	PCYT1A	8754	protein binding	GO:0005515	molecular function	11	344	0.07306	0.02521	0.01234	0.8853	0.01164	0.06751	0.07907	0.0195	0.03258	0.009373	0.01624
366	13026	PCYT1A	8754	nucleus	GO:0005634	cellular component	11	82	0.07306	0.02521	0.01575	0.8586	0.01301	0.06751	0.07907	0.0195	0.03258	0.01219	0.02036
367	13026	PCYT1A	8754	phosphatidylcholine binding	GO:0031210	molecular function	11	4	0.07489	0.03456	0.02671	0.7884	0.02562	0.0682	0.08223	0.02075	0.05755	0.017	0.04197
368	13026	PCYT1A	8754	phosphatidylcholine biosynthetic process	GO:0006656	biological process	11	11	0.08115	0.03932	0.035	0.7524	0.03628	0.06799	0.09687	0.02095	0.07378	0.01834	0.06682
369	13026	PCYT1A	8754	choline-phosphate cytidylyltransferase activity	GO:0004105	molecular function	11	2	0.09381	0.0538	0.0538	0.6931	0.03369	0.0708	0.1243	0.02991	0.09674	0.02991	0.09674
370	18572	PDCD11	13408	transcription factor binding	GO:0008134	molecular function	8	11	0.07306	0.01502	0.002504	0.955	0.004475	0.06751	0.07907	0.00869	0.02596	0.001448	0.004327
371	18572	PDCD11	13408	small-subunit processome	GO:0032040	cellular component	8	3	0.07306	0.03323	0.01612	0.8557	0.01625	0.06751	0.07907	0.02604	0.0424	0.01208	0.02152
372	18572	PDCD11	13408	RNA binding	GO:0003723	molecular function	8	50	0.07306	0.03323	0.02057	0.8236	0.002665	0.06751	0.07907	0.02604	0.0424	0.01972	0.02146
373	18572	PDCD11	13408	nucleolus	GO:0005730	cellular component	8	16	0.07467	0.03323	0.02722	0.7852	0.01253	0.06922	0.08054	0.02604	0.0424	0.02174	0.03409
374	18572	PDCD11	13408	nucleus	GO:0005634	cellular component	8	82	0.07497	0.03323	0.02603	0.7917	0.02045	0.06981	0.08051	0.02604	0.0424	0.01817	0.0373
375	18572	PDCD11	13408	protein binding	GO:0005515	molecular function	8	344	0.07794	0.03424	0.03424	0.755	0.01417	0.07209	0.08428	0.02642	0.04438	0.02642	0.04438
376	13819	EPAS1	3374	histone acetyltransferase binding	GO:0035035	molecular function	18	3	0.07306	0.0193	0.00162	0.9625	0.006058	0.06751	0.07907	0.008317	0.0448	0.0006161	0.004262
377	13819	EPAS1	3374	protein heterodimerization activity	GO:0046982	molecular function	18	6	0.07306	0.02949	0.005718	0.9327	0.001999	0.06751	0.07907	0.02324	0.03743	0.005037	0.00649
378	13819	EPAS1	3374	DNA-binding transcription factor activity, RNA polymerase II-specific	GO:0000981	molecular function	18	18	0.07306	0.02997	0.008823	0.9036	0.01772	0.06751	0.07907	0.023	0.03906	0.004315	0.01804
379	13819	EPAS1	3374	protein binding	GO:0005515	molecular function	18	344	0.07306	0.03152	0.01179	0.8817	0.02525	0.06751	0.07907	0.02765	0.03594	0.006551	0.02121
380	13819	EPAS1	3374	cellular response to hypoxia	GO:0071456	biological process	18	7	0.07306	0.03204	0.01357	0.876	0.01022	0.06751	0.07907	0.02724	0.03768	0.01067	0.01726
381	13819	EPAS1	3374	regulation of transcription by RNA polymerase II	GO:0006357	biological process	18	47	0.07306	0.03231	0.01546	0.8541	0.02647	0.06751	0.07907	0.02762	0.03781	0.008696	0.02748
382	13819	EPAS1	3374	RNA polymerase II transcription regulatory region sequence-specific DNA binding	GO:0000977	molecular function	18	9	0.07306	0.03231	0.01909	0.8338	0.01136	0.06751	0.07907	0.02762	0.03781	0.01573	0.02317
383	13819	EPAS1	3374	positive regulation of transcription by RNA polymerase II	GO:0045944	biological process	18	46	0.07306	0.03231	0.01948	0.8312	0.01026	0.06751	0.07907	0.02762	0.03781	0.01637	0.02318
384	13819	EPAS1	3374	response to hypoxia	GO:0001666	biological process	18	7	0.07306	0.03231	0.02119	0.819	0.004048	0.06751	0.07907	0.02762	0.03781	0.01984	0.02263
385	13819	EPAS1	3374	transcription factor binding	GO:0008134	molecular function	18	11	0.07427	0.03519	0.02576	0.7933	0.01834	0.06764	0.08155	0.02816	0.04397	0.01861	0.03565
386	13819	EPAS1	3374	regulation of protein neddylation	GO:2000434	biological process	18	4	0.0759	0.0353	0.02889	0.7781	0.02052	0.06728	0.08562	0.0281	0.04434	0.01994	0.04184
387	13819	EPAS1	3374	sequence-specific DNA binding	GO:0043565	molecular function	18	11	0.0771	0.03932	0.03497	0.7522	0.002783	0.07138	0.08328	0.03517	0.04397	0.03331	0.0367
388	13819	EPAS1	3374	DNA binding	GO:0003677	molecular function	18	24	0.08077	0.04364	0.03969	0.7353	0.01794	0.07246	0.09002	0.0339	0.05618	0.02867	0.05493
389	13819	EPAS1	3374	transcription regulator complex	GO:0005667	cellular component	18	12	0.09183	0.05498	0.05253	0.6966	0.03192	0.06745	0.125	0.03331	0.09077	0.03	0.092
390	16653	KRAS	6407	focal adhesion	GO:0005925	cellular component	43	23	0.07306	0.03366	0.008786	0.8954	0.02429	0.06751	0.07907	0.03068	0.03693	0.003206	0.02408
391	16653	KRAS	6407	protein-containing complex binding	GO:0044877	molecular function	43	75	0.07306	0.03366	0.01342	0.877	0.01152	0.06751	0.07907	0.03068	0.03693	0.01011	0.01781
392	16653	KRAS	6407	plasma membrane	GO:0005886	cellular component	43	72	0.07306	0.03366	0.01336	0.8652	0.02799	0.06751	0.07907	0.03068	0.03693	0.006467	0.02759
393	16653	KRAS	6407	GDP binding	GO:0019003	molecular function	43	4	0.07306	0.03366	0.01526	0.8635	0.009886	0.06751	0.07907	0.03068	0.03693	0.01268	0.01836
394	16653	KRAS	6407	GTPase activity	GO:0003924	molecular function	43	4	0.07306	0.03366	0.01604	0.8578	0.006314	0.06751	0.07907	0.03068	0.03693	0.01429	0.01801
395	16653	KRAS	6407	GTP binding	GO:0005525	molecular function	43	4	0.07306	0.03366	0.01621	0.8548	0.01635	0.06751	0.07907	0.03068	0.03693	0.01206	0.02178
396	16653	KRAS	6407	extrinsic component of cytoplasmic side of plasma membrane	GO:0031234	cellular component	43	4	0.07306	0.03366	0.01781	0.8439	0.01543	0.06751	0.07907	0.03068	0.03693	0.01367	0.02322
397	16653	KRAS	6407	cytoplasm	GO:0005737	cellular component	43	82	0.07306	0.03388	0.01934	0.8317	0.01492	0.06751	0.07907	0.03101	0.03702	0.01495	0.02502
398	16653	KRAS	6407	protein binding	GO:0005515	molecular function	43	344	0.07308	0.03388	0.02001	0.8263	0.02125	0.0675	0.07911	0.03101	0.03702	0.01367	0.0293
399	16653	KRAS	6407	positive regulation of protein phosphorylation	GO:0001934	biological process	43	19	0.07332	0.03388	0.02442	0.7996	0.00634	0.06758	0.07954	0.03101	0.03702	0.02178	0.02739
400	16653	KRAS	6407	Ras protein signal transduction	GO:0007265	biological process	43	10	0.07428	0.03781	0.02219	0.8137	0.02685	0.06845	0.08061	0.03135	0.0456	0.0138	0.0357
401	16653	KRAS	6407	membrane	GO:0016020	cellular component	43	56	0.07523	0.03713	0.02825	0.7804	0.01426	0.07028	0.08053	0.03146	0.04383	0.0218	0.0366
402	16653	KRAS	6407	positive regulation of cell population proliferation	GO:0008284	biological process	43	41	0.08391	0.04968	0.04472	0.7196	0.003418	0.07701	0.09144	0.04737	0.05209	0.04217	0.04743
403	16653	KRAS	6407	positive regulation of gene expression	GO:0010628	biological process	43	21	0.09348	0.05951	0.05684	0.6867	0.01818	0.0754	0.1159	0.04527	0.07824	0.04143	0.07798
404	16653	KRAS	6407	regulation of protein stability	GO:0031647	biological process	43	6	0.09452	0.05859	0.05726	0.6858	0.01488	0.08461	0.1056	0.04643	0.07394	0.04423	0.07412
405	117606	BOC	17173	protein binding	GO:0005515	molecular function	3	344	0.07306	0.009673	0.009673	0.9034	0.01133	0.06751	0.07907	0.006528	0.01433	0.006528	0.01433
406	16835	LDLR	6547	low-density lipoprotein particle binding	GO:0030169	molecular function	31	2	0.07306	0.05325	0.009582	0.8994	0.01869	0.06751	0.07907	0.03986	0.07114	0.005362	0.01712
407	16835	LDLR	6547	cholesterol import	GO:0070508	biological process	31	3	0.07306	0.05325	0.01225	0.8864	0.009586	0.06751	0.07907	0.03986	0.07114	0.009685	0.01549
[truncated: 2,906 more rows]

## Sheet: Crebbp_up
	mgi_id	hgnc_symbol	hgnc_id	go_name	go_id	go_domain	ncon_gene	ncon_go	global_padj	gene_padj	pval	sim	sem_sim	cilow_global_padj	ciupp_global_padj	cilow_gene_padj	ciupp_gene_padj	cilow_pval	ciupp_pval
[truncated: 7,173 more rows]

[truncated: 2 more sheets: Ehmt1_up, Nsd1_up]
