# Supplementary material for: Identification of a transcriptional signature found in multiple models of ASD and related disorders
Source: HighWire-hosted journal article supplement (doi:10.1101/gr.276591.122), 2022-09-01
Supplement: Supplemental_Table_S8.xlsx [file Supplemental_Table_S8.xlsx]

## Sheet: Legend
Supplemental_Table_S8
GUIDE TO CHROMHMM OVERLAP ENRICHMENT
Sheet name	Figure	Data
1. Promoter (TSS - 500bp)	F4A	Promoter (TSS - 500bp) regions of the genes in the down and up regulated narrow signatures, genes expressed in neuronal culture, and all annotated mm10 genes
2. Promoter (TSS - 500bp)	F4B	Promoter (TSS - 500bp) regions of the genes in the down and up regulated broad signatures, genes expressed in neuronal culture, and all annotated mm10 genes
3. Promoter (TSS - 2000bp)	S6E	Promoter (TSS - 2000bp) regions of the genes in the down and up regulated narrow signatures, genes expressed in neuronal culture, and all annotated mm10 genes
4. Promoter (TSS - 2000bp)	S6F	Promoter (TSS - 2000bp) regions of the genes in the down and up regulated broad signatures, genes expressed in neuronal culture, and all annotated mm10 genes
State Abbreviations	Name (from Gorkin et al. 2020)
1_Pr-A	Active promoter
2_Pr-W	Weak/inactive promoter
3_Pr-B	Bivalent promoter
4_Pr-F	Flanking promoter
5_En-Sd	Strong; TSS-distal enhancer
6_En-Sp	Strong; TSS-proximal enhancer
7_En-W	Weak; TSS-distal enhancer
8_En-Pd	Poised; TSS-distal enhancer
9_En-Pp	Poised; TSS-proximal enhancer
10_Tr-S	Strong transcription
11_Tr-P	Permissive transcription
12_Tr-I	Transcription initiation
13_Hc-P	Polycomb-associated heterochromatin
14_Hc-H	H3K9me3-associated heterochromatin
15_NS	No signal

## Sheet: 1.Narrow (TSS - 500bp)
State (User order)	Genome %	NarrowDownRegSignature_Promoter500	NarrowUpRegSignature_Promoter500	Narrow-ExpressedInCulture_Promoter500	mm10_Promoter500
1_Pr-A	0.37042	70.2527	121.245	99.5918	58.5382
2_Pr-W	0.23394	74.8698	76.7864	92.137	55.0751
3_Pr-B	0.25489	66.3127	12.8348	30.2956	27.2484
4_Pr-F	0.28119	24.3894	22.6549	23.2719	15.169
5_En-Sd	0.53465	1.52411	0.10615	1.08131	1.28575
6_En-Sp	0.15141	48.2577	27.886	22.6732	15.0514
7_En-W	0.22597	0.32307	0	1.1259	1.27723
8_En-Pd	1.97633	0.41567	0.94822	0.3826	0.71539
9_En-Pp	0.19908	20.1989	18.381	25.9597	16.968
10_Tr-S	5.10482	0.13666	0	0.15567	0.45906
11_Tr-P	25.0726	0.31647	0.14967	0.28119	0.51908
12_Tr-I	0.2928	9.90541	2.42683	3.8751	3.48246
13_Hc-P	2.03914	2.82836	2.1401	1.58957	2.13243
14_Hc-H	2.18476	0	0	0.28176	1.0645
15_NS	61.078	0.03871	0.1448	0.06979	0.37858
Base	100	0.00498	0.0031	0.31884	0.56755

## Sheet: 2.Broad (TSS - 500bp)
State (User order)	Genome %	BroadDownRegSignature_Promoter500	BroadUpRegSignature_Promoter500	Broad-ExpressedInCulture_Promoter500	mm10_Promoter500
1_Pr-A	0.37042	78.1507	116.864	81.7846	58.5382
2_Pr-W	0.23394	88.1247	94.2117	77.2099	55.0751
3_Pr-B	0.25489	56.8882	18.9638	33.8449	27.2484
4_Pr-F	0.28119	29.0086	16.828	20.6922	15.169
5_En-Sd	0.53465	1.41429	1.57268	1.31179	1.28575
6_En-Sp	0.15141	30.1507	16.4753	20.0749	15.0514
7_En-W	0.22597	0.921	1.05337	1.31853	1.27723
8_En-Pd	1.97633	0.39928	0.23552	0.61054	0.71539
9_En-Pp	0.19908	23.1912	25.9596	23.0249	16.968
10_Tr-S	5.10482	0.09271	0.10351	0.23721	0.45906
11_Tr-P	25.0726	0.30625	0.23767	0.40463	0.51908
12_Tr-I	0.2928	4.92494	2.40306	4.16666	3.48246
13_Hc-P	2.03914	2.19274	1.42942	2.11131	2.13243
14_Hc-H	2.18476	0.03372	0.37052	0.42068	1.0645
15_NS	61.078	0.04428	0.0816	0.15665	0.37858
Base	100	0.03984	0.02904	0.39979	0.56755

## Sheet: 3.Narrow (TSS - 2000bp)
State (User order)	Genome %	NarrowDownRegSignature_Promoter2000	NarrowUpRegSignature_Promoter2000	Narrow-ExpressedInCulture_Promoter2000	mm10_Promoter2000
1_Pr-A	0.37042	29.1588	51.7382	39.4307	23.9545
2_Pr-W	0.23394	28.4093	33.1495	38.0676	23.4167
3_Pr-B	0.25489	33.9731	11.1587	15.2903	13.4749
4_Pr-F	0.28119	17.0643	24.2397	22.0146	14.2536
5_En-Sd	0.53465	3.36149	1.12471	1.83786	1.59085
6_En-Sp	0.15141	25.589	23.8521	16.9413	11.2487
7_En-W	0.22597	1.03732	2.66104	2.67815	2.09253
8_En-Pd	1.97633	1.79382	1.686	1.26496	1.12864
9_En-Pp	0.19908	16.0782	20.0241	22.9178	14.4527
10_Tr-S	5.10482	0.26881	0.24244	0.46252	0.6262
11_Tr-P	25.0726	1.04755	0.9316	1.12257	1.04945
12_Tr-I	0.2928	11.4418	11.6355	10.1942	6.95389
13_Hc-P	2.03914	10.1323	3.70033	4.8564	4.42634
14_Hc-H	2.18476	0.07339	0.1617	0.35713	1.07614
15_NS	61.078	0.07588	0.25191	0.18028	0.44451
Base	100	0.01565	0.00976	1.02261	1.80006

## Sheet: 4. Broad (TSS - 2000bp)
State (User order)	Genome %	BroadDownRegSignature_Promoter2000	BroadUpRegSignature_Promoter2000	Broad-ExpressedInCulture_Promoter2000	mm10_Promoter2000
1_Pr-A	0.37042	31.3572	47.6599	32.8643	23.9545
2_Pr-W	0.23394	34.9613	41.1133	32.2255	23.4167
3_Pr-B	0.25489	28.7329	9.8258	16.5041	13.4749
4_Pr-F	0.28119	20.0881	20.5281	19.3422	14.2536
5_En-Sd	0.53465	2.67284	1.74517	1.83598	1.59085
6_En-Sp	0.15141	19.4251	14.9896	14.8278	11.2487
7_En-W	0.22597	2.49986	2.7771	2.54033	2.09253
8_En-Pd	1.97633	1.2459	1.16807	1.26009	1.12864
9_En-Pp	0.19908	18.5658	26.2341	19.5801	14.4527
10_Tr-S	5.10482	0.29746	0.31258	0.51514	0.6262
11_Tr-P	25.0726	1.11246	1.08292	1.12967	1.04945
12_Tr-I	0.2928	9.34838	8.7113	9.13112	6.95389
13_Hc-P	2.03914	7.85347	3.20938	5.13012	4.42634
14_Hc-H	2.18476	0.15185	0.48887	0.47477	1.07614
15_NS	61.078	0.12518	0.23215	0.25095	0.44451
Base	100	0.1254	0.09174	1.2791	1.80006
