# Supplementary material for: Identification of a transcriptional signature found in multiple models of ASD and related disorders
Source: HighWire-hosted journal article supplement (doi:10.1101/gr.276591.122), 2022-09-01
Supplement: Supplemental_Table_S9.xlsx [file Supplemental_Table_S9.xlsx]

## Sheet: Legend
Supplemental_Table_S9
Sheet 1:	Results table of FGSEA run against DESeq2 results for external mouse datasets. Shared transcriptional signature lists were used as comarison pathways.
Sheet 2:	Results table of FGSEA run against DESeq2 results for external mouse/human datasets. DEG lists upon knockown of CREBBP, CHD8, or EHMT1 in cultured neurons were used as comarison pathways.
Sheet 3:	Results table of overlapping broad transcriptional signatures with DEG lists from external mouse datasets
Accession numbers for external datasets are noted in each tab

## Sheet: Mouse to Signatures - GSEA 
Sample Name - DE results	GEO dataset	Comparison pathway	pval	padj	log2err	ES	NES	size
6month_WTvQ140_HD	GSE78272	DownRegNarrow_Signature	0.14305	0.2861	0.132846	-0.389421	-1.19814	206
6month_WTvQ140_HD	GSE78272	DownRegBroad_Signature	0.718847	0.958462	0.0300618	-0.271307	-0.947961	1587
6month_WTvQ140_HD	GSE78272	UpRegNarrow_Signature	0.049435	0.19774	0.24134	-0.468669	-1.36545	126
6month_WTvQ140_HD	GSE78272	UpRegBroad_Signature	1	1	0.172324	0.182961	0.736596	1159
CBP-p300_dKOvWT	GSE133018	DownRegNarrow_Signature	4.62184e-06	9.24369e-06	0.610527	-0.473348	-1.82563	205
CBP-p300_dKOvWT	GSE133018	DownRegBroad_Signature	1.70744e-26	6.82977e-26	1.3345	-0.425248	-1.82859	1576
CBP-p300_dKOvWT	GSE133018	UpRegNarrow_Signature	0.125337	0.125337	0.142901	-0.340508	-1.24149	125
CBP-p300_dKOvWT	GSE133018	UpRegBroad_Signature	5.30832e-05	7.07776e-05	0.557332	-0.319735	-1.36499	1137
FMR1_WTvKO_cortex	GSE193663	DownRegNarrow_Signature	0.00101545	0.00203091	0.45506	-0.411909	-1.53802	206
FMR1_WTvKO_cortex	GSE193663	DownRegBroad_Signature	7.45164e-08	2.98066e-07	0.704976	-0.323326	-1.4284	1591
FMR1_WTvKO_cortex	GSE193663	UpRegNarrow_Signature	0.413088	0.550784	0.0908241	-0.291052	-1.02208	127
FMR1_WTvKO_cortex	GSE193663	UpRegBroad_Signature	1	1	0.052805	-0.150304	-0.655389	1168
WTvHD_ctxCombined	GSE65775	DownRegNarrow_Signature	0.0159107	0.0318214	0.352488	0.300467	1.31543	203
WTvHD_ctxCombined	GSE65775	DownRegBroad_Signature	0.000474261	0.00189705	0.498493	0.23974	1.24446	1599
WTvHD_ctxCombined	GSE65775	UpRegNarrow_Signature	0.178694	0.20681	0.134273	-0.32035	-1.21458	124
WTvHD_ctxCombined	GSE65775	UpRegBroad_Signature	0.20681	0.20681	0.103197	-0.22967	-1.08478	1149
WTvHD_Hippocampus	GSE65775	DownRegNarrow_Signature	0.122951	0.163934	0.145516	0.281505	1.18935	202
WTvHD_Hippocampus	GSE65775	DownRegBroad_Signature	0.230601	0.230601	0.0883594	0.215744	1.05451	1585
WTvHD_Hippocampus	GSE65775	UpRegNarrow_Signature	0.000129334	0.000258669	0.518848	-0.401908	-1.71889	119
WTvHD_Hippocampus	GSE65775	UpRegBroad_Signature	1.03326e-19	4.13304e-19	1.15122	-0.34638	-1.83888	1128
WTvKdm6aKO_ms	GSE81251	DownRegNarrow_Signature	0.954455	1	0.0473534	-0.22936	-0.795653	206
WTvKdm6aKO_ms	GSE81251	DownRegBroad_Signature	1	1	0.0460458	-0.190469	-0.762545	1590
WTvKdm6aKO_ms	GSE81251	UpRegNarrow_Signature	0.06917	0.27668	0.24134	0.40306	1.29423	127
WTvKdm6aKO_ms	GSE81251	UpRegBroad_Signature	0.753937	1	0.0579755	0.24086	0.948204	1165
MeCP2-null	GSE96684	DownRegNarrow_Signature	0.00432654	0.0173061	0.407018	-0.362485	-1.43445	204
MeCP2-null	GSE96684	DownRegBroad_Signature	0.04617	0.06156	0.213928	-0.250912	-1.13699	1542
MeCP2-null	GSE96684	UpRegNarrow_Signature	0.0176693	0.0353387	0.352488	-0.393687	-1.42371	109
MeCP2-null	GSE96684	UpRegBroad_Signature	0.218505	0.218505	0.249247	0.205924	1.04993	1065
HTT_Q115_R6/1	GSE139847	DownRegNarrow_Signature	0.00406953	0.00542604	0.407018	-0.416701	-1.44325	206
HTT_Q115_R6/1	GSE139847	DownRegBroad_Signature	7.7112e-06	3.08448e-05	0.593325	-0.354502	-1.30878	1554
HTT_Q115_R6/1	GSE139847	UpRegNarrow_Signature	0.000705625	0.00141125	0.477271	-0.493618	-1.64121	120
HTT_Q115_R6/1	GSE139847	UpRegBroad_Signature	0.549451	0.549451	0.041321	-0.269393	-0.989825	1112
Mecp2KOvWT	GSE142716	DownRegNarrow_Signature	0.00778703	0.0116805	0.407018	-0.431157	-1.41742	203
Mecp2KOvWT	GSE142716	DownRegBroad_Signature	0.000284809	0.000854428	0.498493	-0.358058	-1.25131	1601
Mecp2KOvWT	GSE142716	UpRegNarrow_Signature	0.281818	0.281818	0.257206	0.260653	1.0702	125
Mecp2KOvWT	GSE142716	UpRegBroad_Signature	NA	NA	NA	0.231519	NA	1175
Mecp2mut_T158M	GSE142716	DownRegNarrow_Signature	0.12798	0.481781	0.135741	-0.336639	-1.19946	203
Mecp2mut_T158M	GSE142716	DownRegBroad_Signature	0.240891	0.481781	0.0817516	-0.266702	-1.06078	1601
Mecp2mut_T158M	GSE142716	UpRegNarrow_Signature	0.56768	0.756906	0.0546808	-0.283185	-0.949446	125
Mecp2mut_T158M	GSE142716	UpRegBroad_Signature	0.997947	0.997947	0.00788031	-0.190193	-0.752126	1169
WSCR_CD_vs_WT	GSE127723	DownRegNarrow_Signature	1	1	0.036762	-0.157495	-0.563833	206
WSCR_CD_vs_WT	GSE127723	DownRegBroad_Signature	1	1	0.0242154	-0.181747	-0.755906	1582
WSCR_CD_vs_WT	GSE127723	UpRegNarrow_Signature	0.498239	1	0.0727141	-0.291149	-0.976082	124
WSCR_CD_vs_WT	GSE127723	UpRegBroad_Signature	1	1	0.0808589	0.19384	0.832829	1156
WTvGtf2i-Gtf2ird1_LOF	GSE127723	DownRegNarrow_Signature	0.870807	1	0.0298485	-0.259563	-0.827857	206
WTvGtf2i-Gtf2ird1_LOF	GSE127723	DownRegBroad_Signature	1	1	0.004809	-0.222837	-0.787906	1576
WTvGtf2i-Gtf2ird1_LOF	GSE127723	UpRegNarrow_Signature	0.118954	0.475817	0.144631	-0.409398	-1.24094	122
WTvGtf2i-Gtf2ird1_LOF	GSE127723	UpRegBroad_Signature	0.826353	1	0.0222268	-0.258866	-0.909819	1142
Kmt2d_WTvKO_cereb_1mo	GSE95626	DownRegNarrow_Signature	0.000180638	0.000361275	0.518848	0.40768	1.67048	199
Kmt2d_WTvKO_cereb_1mo	GSE95626	DownRegBroad_Signature	2.42492e-10	9.69969e-10	0.814036	0.329594	1.54642	1566
Kmt2d_WTvKO_cereb_1mo	GSE95626	UpRegNarrow_Signature	0.0500736	0.0500736	0.245042	0.359003	1.37223	113
Kmt2d_WTvKO_cereb_1mo	GSE95626	UpRegBroad_Signature	0.0265495	0.0353993	0.352488	-0.207913	-1.1061	1125
Chd8_WTvHet_nucleus_accumbens	SRP102009	DownRegNarrow_Signature	0.00400463	0.00800926	0.407018	-0.37828	-1.56375	199
Chd8_WTvHet_nucleus_accumbens	SRP102009	DownRegBroad_Signature	4.1167e-07	1.64668e-06	0.674963	-0.302703	-1.45615	1567
Chd8_WTvHet_nucleus_accumbens	SRP102009	UpRegNarrow_Signature	0.166378	0.221837	0.140406	-0.316147	-1.19957	110
Chd8_WTvHet_nucleus_accumbens	SRP102009	UpRegBroad_Signature	0.28629	0.28629	0.165657	0.205713	1.02987	1096
Ehmt1_WTvHet_Hippo	GSE89010	DownRegNarrow_Signature	1	1	0.043888	-0.121649	-0.428464	203
Ehmt1_WTvHet_Hippo	GSE89010	DownRegBroad_Signature	1	1	0.0383996	-0.136316	-0.556747	1615
Ehmt1_WTvHet_Hippo	GSE89010	UpRegNarrow_Signature	0.993952	1	0.0463228	-0.202557	-0.67582	126
Ehmt1_WTvHet_Hippo	GSE89010	UpRegBroad_Signature	0.165517	0.662069	0.140406	-0.264636	-1.0689	1191

## Sheet: Ms or Hs to Culture - GSEA
Sample Name - DE results	Sample system	GEO dataset	Comparison pathway	Comparison system	pval	padj	log2err	ES	NES	size
CHD8vCtrl_iN-glut	Human	GSE107878	CBPsh5_vLucif_down	Primary neuronal culture	0.43662	1	0.17822	-0.245906	-1.00096	1304
CHD8vCtrl_iN-glut	Human	GSE107878	CBPsh5_vLucif_up	Primary neuronal culture	0.998723	1	0.0241448	0.213469	0.7861	709
CHD8vCtrl_iN-glut	Human	GSE107878	Chd8sh5_vLucif_down	Primary neuronal culture	0.00522715	0.0313629	0.407018	-0.335286	-1.31333	551
CHD8vCtrl_iN-glut	Human	GSE107878	Chd8sh5_vLucif_up	Primary neuronal culture	0.774965	1	0.0412376	0.258218	0.902073	345
CHD8vCtrl_iN-glut	Human	GSE107878	Ehmt1sh2_vLucif_down	Primary neuronal culture	1	1	0.0968878	-0.210063	-0.850903	959
CHD8vCtrl_iN-glut	Human	GSE107878	Ehmt1sh2_vLucif_up	Primary neuronal culture	1	1	0.0228694	0.195708	0.72798	840
Ehmt1mut_GSE178646_iN	Human	GSE178646	CBPsh5_vLucif_down	Primary neuronal culture	0.0169705	0.0509116	0.352488	0.273117	1.17846	852
Ehmt1mut_GSE178646_iN	Human	GSE178646	CBPsh5_vLucif_up	Primary neuronal culture	0.995482	0.995482	0.0327242	-0.198896	-0.798939	559
Ehmt1mut_GSE178646_iN	Human	GSE178646	Chd8sh5_vLucif_down	Primary neuronal culture	0.235616	0.353425	0.149208	0.256081	1.0541	399
Ehmt1mut_GSE178646_iN	Human	GSE178646	Chd8sh5_vLucif_up	Primary neuronal culture	0.00934918	0.0509116	0.38073	-0.371137	-1.39394	242
Ehmt1mut_GSE178646_iN	Human	GSE178646	Ehmt1sh2_vLucif_down	Primary neuronal culture	0.443425	0.53211	0.0714786	-0.247773	-1.00487	687
Ehmt1mut_GSE178646_iN	Human	GSE178646	Ehmt1sh2_vLucif_up	Primary neuronal culture	0.205202	0.353425	0.165657	0.248703	1.06284	638
RubTay_vCtrl_iNPC-iN	Human	GSE135287	CBPsh5_vLucif_down	Primary neuronal culture	6.19194e-11	3.71517e-10	0.839089	-0.402034	-1.50989	1287
RubTay_vCtrl_iNPC-iN	Human	GSE135287	CBPsh5_vLucif_up	Primary neuronal culture	1	1	0.199915	0.143779	0.611406	700
RubTay_vCtrl_iNPC-iN	Human	GSE135287	Chd8sh5_vLucif_down	Primary neuronal culture	0.977297	1	0.0149447	-0.223525	-0.814237	545
RubTay_vCtrl_iNPC-iN	Human	GSE135287	Chd8sh5_vLucif_up	Primary neuronal culture	0.0131757	0.039527	0.38073	-0.367221	-1.30387	343
RubTay_vCtrl_iNPC-iN	Human	GSE135287	Ehmt1sh2_vLucif_down	Primary neuronal culture	0.0679012	0.135802	0.172324	-0.305071	-1.13501	957
RubTay_vCtrl_iNPC-iN	Human	GSE135287	Ehmt1sh2_vLucif_up	Primary neuronal culture	1	1	0.00893801	-0.174568	-0.647436	838
CBP-p300_dKOvWT	Mouse	GSE133018	CBPsh5_vLucif_down	Primary neuronal culture	6.23609e-84	3.74166e-83	2.39502	-0.577733	-2.48509	1326
CBP-p300_dKOvWT	Mouse	GSE133018	CBPsh5_vLucif_up	Primary neuronal culture	1	1	0.202072	0.158682	0.797223	738
CBP-p300_dKOvWT	Mouse	GSE133018	Chd8sh5_vLucif_down	Primary neuronal culture	1.04704e-06	1.57056e-06	0.643552	-0.387381	-1.60285	551
CBP-p300_dKOvWT	Mouse	GSE133018	Chd8sh5_vLucif_up	Primary neuronal culture	5.34306e-05	6.41168e-05	0.557332	-0.389115	-1.57035	352
CBP-p300_dKOvWT	Mouse	GSE133018	Ehmt1sh2_vLucif_down	Primary neuronal culture	6.97617e-09	1.39523e-08	0.761461	-0.371872	-1.58712	968
CBP-p300_dKOvWT	Mouse	GSE133018	Ehmt1sh2_vLucif_up	Primary neuronal culture	5.95713e-14	1.78714e-13	0.954542	-0.41894	-1.78193	852
Chd8_WTvHet_nucleus_accumbens	Mouse	SRP102009	CBPsh5_vLucif_down	Primary neuronal culture	4.32107e-10	2.59264e-09	0.814036	-0.338787	-1.60017	1319
Chd8_WTvHet_nucleus_accumbens	Mouse	SRP102009	CBPsh5_vLucif_up	Primary neuronal culture	0.491749	0.521986	0.10925	0.204512	0.994465	726
Chd8_WTvHet_nucleus_accumbens	Mouse	SRP102009	Chd8sh5_vLucif_down	Primary neuronal culture	0.00111484	0.00222969	0.45506	-0.319159	-1.43338	556
Chd8_WTvHet_nucleus_accumbens	Mouse	SRP102009	Chd8sh5_vLucif_up	Primary neuronal culture	0.00264303	0.00396455	0.431708	-0.333381	-1.43018	348
Chd8_WTvHet_nucleus_accumbens	Mouse	SRP102009	Ehmt1sh2_vLucif_down	Primary neuronal culture	7.60553e-07	2.28166e-06	0.659444	-0.333229	-1.54855	973
Chd8_WTvHet_nucleus_accumbens	Mouse	SRP102009	Ehmt1sh2_vLucif_up	Primary neuronal culture	0.521986	0.521986	0.0598603	-0.213555	-0.9845	819
Ehmt1_WTvHet_Hippo	Mouse	GSE89010	CBPsh5_vLucif_down	Primary neuronal culture	1	1	0.036685	-0.1769	-0.720571	1359
Ehmt1_WTvHet_Hippo	Mouse	GSE89010	CBPsh5_vLucif_up	Primary neuronal culture	0.431271	1	0.078921	-0.254452	-1.00517	760
Ehmt1_WTvHet_Hippo	Mouse	GSE89010	Chd8sh5_vLucif_down	Primary neuronal culture	1	1	0.0405756	-0.121747	-0.470041	562
Ehmt1_WTvHet_Hippo	Mouse	GSE89010	Chd8sh5_vLucif_up	Primary neuronal culture	0.0612245	0.367347	0.248911	-0.315459	-1.18287	367
Ehmt1_WTvHet_Hippo	Mouse	GSE89010	Ehmt1sh2_vLucif_down	Primary neuronal culture	0.828814	1	0.0466948	-0.231447	-0.929559	995
Ehmt1_WTvHet_Hippo	Mouse	GSE89010	Ehmt1sh2_vLucif_up	Primary neuronal culture	1	1	0.0383996	-0.116174	-0.462544	869
CHD8vCtrl_iN-glut_CHD8vWT_DESeqRes	Human	GSE107878	CBP-p300_dKOvWT_Down	Mouse	NA	NA	NA	-0.301993	NA	2763
CHD8vCtrl_iN-glut_CHD8vWT_DESeqRes	Human	GSE107878	CBP-p300_dKOvWT_Up	Mouse	1	1	0.00617356	0.200903	0.735681	1953
CHD8vCtrl_iN-glut_CHD8vWT_DESeqRes	Human	GSE107878	Chd8_WTvHet_nucleus_accumbens_down	Mouse	0.850242	1	0.0988903	-0.237935	-0.896378	317
CHD8vCtrl_iN-glut_CHD8vWT_DESeqRes	Human	GSE107878	Chd8_WTvHet_nucleus_accumbens_up	Mouse	1	1	0.0770737	-0.142454	-0.520464	203
CHD8vCtrl_iN-glut_CHD8vWT_DESeqRes	Human	GSE107878	Ehmt1_WTvHet_down	Mouse	0.0503686	0.3	0.222056	0.360556	1.23563	418
CHD8vCtrl_iN-glut_CHD8vWT_DESeqRes	Human	GSE107878	Ehmt1_WTvHet_Up	Mouse	0.232653	0.465306	0.100633	0.35022	1.11873	173
Ehmt1mut_GSE178646_iN_DESeqRes	Human	GSE178646	CBP-p300_dKOvWT_Down	Mouse	4.97418e-08	2.98451e-07	0.719513	0.296693	1.34027	1889
Ehmt1mut_GSE178646_iN_DESeqRes	Human	GSE178646	CBP-p300_dKOvWT_Up	Mouse	0.629252	0.943878	0.0409056	-0.235365	-0.966195	1437
Ehmt1mut_GSE178646_iN_DESeqRes	Human	GSE178646	Chd8_WTvHet_nucleus_accumbens_down	Mouse	0.816129	0.979355	0.0785029	0.229564	0.884213	224
Ehmt1mut_GSE178646_iN_DESeqRes	Human	GSE178646	Chd8_WTvHet_nucleus_accumbens_up	Mouse	1	1	0.0330163	-0.181027	-0.635168	172
Ehmt1mut_GSE178646_iN_DESeqRes	Human	GSE178646	Ehmt1_WTvHet_down	Mouse	0.00977716	0.0293315	0.38073	-0.378292	-1.37474	247
Ehmt1mut_GSE178646_iN_DESeqRes	Human	GSE178646	Ehmt1_WTvHet_Up	Mouse	0.452145	0.90429	0.0743625	-0.311249	-0.996983	82
RubTay_vCtrl_iNPC-iN_all_DESeqRes	Human	GSE135287	CBP-p300_dKOvWT_Down	Mouse	3.08002e-11	1.84801e-10	0.851339	-0.414341	-1.30607	2749
RubTay_vCtrl_iNPC-iN_all_DESeqRes	Human	GSE135287	CBP-p300_dKOvWT_Up	Mouse	1	1	0	-0.256402	-0.806681	1933
RubTay_vCtrl_iNPC-iN_all_DESeqRes	Human	GSE135287	Chd8_WTvHet_nucleus_accumbens_down	Mouse	0.443655	0.665482	0.0518458	-0.329431	-1.01277	316
RubTay_vCtrl_iNPC-iN_all_DESeqRes	Human	GSE135287	Chd8_WTvHet_nucleus_accumbens_up	Mouse	1	1	0.010461	-0.187563	-0.566185	200
RubTay_vCtrl_iNPC-iN_all_DESeqRes	Human	GSE135287	Ehmt1_WTvHet_down	Mouse	6.16094e-06	1.84828e-05	0.610527	-0.489013	-1.5103	416
RubTay_vCtrl_iNPC-iN_all_DESeqRes	Human	GSE135287	Ehmt1_WTvHet_Up	Mouse	0.00163111	0.00326222	0.45506	-0.50033	-1.49438	169

## Sheet: Ms vs. Broad Sigs - Overlap
List1	List2	List2 GEO Accession	ith	jth	overlap	hyper_pval	backgroundSize
DownReg_BroadSignature	CBP-p300_dKOvWT_Down	GSE133018	1622	2981	478	1.87e-42	17987
DownReg_BroadSignature	CBP-p300_dKOvWT_Up	GSE133018	1622	2224	200	0.529931	17987
DownReg_BroadSignature	FMR1_WTvKO_cortex_Down	GSE193663	1622	818	134	4.36e-12	17987
DownReg_BroadSignature	FMR1_WTvKO_cortex_Up	GSE193663	1622	329	16	0.998522	17987
DownReg_BroadSignature	WTvGtf2i-Gtf2ird1_LOF_Down	GSE127723	1622	12	0	1	17987
DownReg_BroadSignature	WTvGtf2i-Gtf2ird1_LOF_Up	GSE127723	1622	5	1	0.376606	17987
DownReg_BroadSignature	HTT_Q140_Down	GSE78272	1622	372	62	1.55e-06	17987
DownReg_BroadSignature	HTT_Q140_Up	GSE78272	1622	246	24	0.37367	17987
DownReg_BroadSignature	HTT_Q175_ctx_Down	GSE65775	1622	3024	263	0.760015	17987
DownReg_BroadSignature	HTT_Q175_ctx_Up	GSE65775	1622	3248	435	2.96e-20	17987
DownReg_BroadSignature	HTT_Q175_hippo_Down	GSE65775	1622	583	112	6.75e-15	17987
DownReg_BroadSignature	HTT_Q175_hippo_Up	GSE65775	1622	485	92	4e-12	17987
DownReg_BroadSignature	HTT_Q115_R6-1_down	GSE139847	1622	693	130	2.87e-16	17987
DownReg_BroadSignature	HTT_Q115_R6-1_up	GSE139847	1622	118	11	0.500548	17987
DownReg_BroadSignature	Kdm6aKO_Down	GSE81251	1622	24	5	0.0593838	17987
DownReg_BroadSignature	Kdm6aKO_Up	GSE81251	1622	16	2	0.430003	17987
DownReg_BroadSignature	MeCP2-null_Down	GSE96684	1622	510	106	1.41e-16	17987
DownReg_BroadSignature	MeCP2-null_Up	GSE96684	1622	530	87	2.58e-08	17987
DownReg_BroadSignature	Mecp2KO_down	GSE142716	1622	719	139	1.68e-18	17987
DownReg_BroadSignature	Mecp2KO_up	GSE142716	1622	555	56	0.204054	17987
DownReg_BroadSignature	Mecp2mut_down	GSE142716	1622	424	74	2.22e-08	17987
DownReg_BroadSignature	Mecp2mut_up	GSE142716	1622	428	61	0.000225	17987
DownReg_BroadSignature	WilliamsCD_Down	GSE127723	1622	24	4	0.165529	17987
DownReg_BroadSignature	WilliamsCD_Up	GSE127723	1622	15	3	0.147459	17987
UpReg_BroadSignature	CBP-p300_dKOvWT_Down	GSE133018	1197	2981	258	2.02e-06	17987
UpReg_BroadSignature	CBP-p300_dKOvWT_Up	GSE133018	1197	2224	88	1	17987
UpReg_BroadSignature	FMR1_WTvKO_cortex_Down	GSE193663	1197	818	39	0.991383	17987
UpReg_BroadSignature	FMR1_WTvKO_cortex_Up	GSE193663	1197	329	23	0.434181	17987
UpReg_BroadSignature	WTvGtf2i-Gtf2ird1_LOF_Down	GSE127723	1197	12	3	0.0411219	17987
UpReg_BroadSignature	WTvGtf2i-Gtf2ird1_LOF_Up	GSE127723	1197	5	0	1	17987
UpReg_BroadSignature	HTT_Q140_Down	GSE78272	1197	372	22	0.748181	17987
UpReg_BroadSignature	HTT_Q140_Up	GSE78272	1197	246	21	0.144281	17987
UpReg_BroadSignature	HTT_Q175_ctx_Down	GSE65775	1197	3024	320	2.25e-19	17987
UpReg_BroadSignature	HTT_Q175_ctx_Up	GSE65775	1197	3248	149	1	17987
UpReg_BroadSignature	HTT_Q175_hippo_Down	GSE65775	1197	583	49	0.0542108	17987
UpReg_BroadSignature	HTT_Q175_hippo_Up	GSE65775	1197	485	17	0.999217	17987
UpReg_BroadSignature	HTT_Q115_R6-1_down	GSE139847	1197	693	52	0.199596	17987
UpReg_BroadSignature	HTT_Q115_R6-1_up	GSE139847	1197	118	8	0.530855	17987
UpReg_BroadSignature	Kdm6aKO_Down	GSE81251	1197	24	1	0.808693	17987
UpReg_BroadSignature	Kdm6aKO_Up	GSE81251	1197	16	1	0.667903	17987
UpReg_BroadSignature	MeCP2-null_Down	GSE96684	1197	510	30	0.785669	17987
UpReg_BroadSignature	MeCP2-null_Up	GSE96684	1197	530	51	0.00511288	17987
UpReg_BroadSignature	Mecp2KO_down	GSE142716	1197	719	34	0.988753	17987
UpReg_BroadSignature	Mecp2KO_up	GSE142716	1197	555	63	2.21e-05	17987
UpReg_BroadSignature	Mecp2mut_down	GSE142716	1197	424	29	0.466904	17987
UpReg_BroadSignature	Mecp2mut_up	GSE142716	1197	428	25	0.779748	17987
UpReg_BroadSignature	WilliamsCD_Down	GSE127723	1197	24	0	1	17987
UpReg_BroadSignature	WilliamsCD_Up	GSE127723	1197	15	2	0.263407	17987
DownReg_BroadSignature	CBP-p300_dKOvWT_Down	GSE133018	1622	961	218	1.27e-39	17987
DownReg_BroadSignature	CBP-p300_dKOvWT_Up	GSE133018	1622	398	26	0.971524	17987
DownReg_BroadSignature	Ehmt1_WTvHet_Hippo_Down	GSE89010	1622	658	40	0.998062	17987
DownReg_BroadSignature	Ehmt1_WTvHet_Hippo_Up	GSE89010	1622	488	20	0.999993	17987
DownReg_BroadSignature	Kmt2d_WTvHet_1mo_down	GSE95626	1622	945	98	0.0778865	17987
DownReg_BroadSignature	Kmt2d_WTvHet_1mo_up	GSE95626	1622	1417	218	4.8e-16	17987
UpReg_BroadSignature	Ehmt1_WTvHet_Hippo_Down	GSE89010	1197	658	33	0.968145	17987
UpReg_BroadSignature	Ehmt1_WTvHet_Hippo_Up	GSE89010	1197	488	13	0.999982	17987
UpReg_BroadSignature	Kmt2d_WTvHet_1mo_down	GSE95626	1197	945	87	0.00121528	17987
UpReg_BroadSignature	Kmt2d_WTvHet_1mo_up	GSE95626	1197	1417	77	0.978311	17987
DownReg_BroadSignature	Chd8_WTvHet_nucleus_accumbens_down	SRP102009	1622	377	42	0.0891627	17987
DownReg_BroadSignature	Chd8_WTvHet_nucleus_accumbens_up	SRP102009	1622	498	7	1	17987
UpReg_BroadSignature	Chd8_WTvHet_nucleus_accumbens_down	SRP102009	1197	377	10	0.999872	17987
UpReg_BroadSignature	Chd8_WTvHet_nucleus_accumbens_up	SRP102009	1197	498	17	0.999525	17987
