# Supplementary material for: Identification of a transcriptional signature found in multiple models of ASD and related disorders
Source: HighWire-hosted journal article supplement (doi:10.1101/gr.276591.122), 2022-09-01
Supplement: Supplemental_Table_S10.xlsx [file Supplemental_Table_S10.xlsx]

## Sheet: Legend
Supplemental_Table_S10
Overlap numbers for BrainSpan Module gene lists (Ji et al., 2016) and signature lists reported here.
Headers
"Multiple comparisons number": indicates the order in which intersection and significance testing were performed
"Overlap number": indicates the number of overlapping module and signature genes found
"pvalue": indicates the pvalue of the overlap based on the hypergeometric discribution
"BH critical value": indicates the threshold for significance given the nth comparison, noted in "multiple comparisons number"

## Sheet: BrainSpan v Signature OLs
		Narrow Signature - Down			Narrow Signature - Up			Broad Signature - Down			Broad Signature - Up
Multiple comparisons number	Module	Overlap Number	pvalue	BH critical value	Overlap Number	pvalue	BH critical value	Overlap Number	pvalue	BH critical value	Overlap Number	pvalue	BH critical value
1	M01_BrainSpanGenes	11	0.999417	0.00121951	13	0.699386	0.00121951	86	1	0.00121951	196	6.87595e-09	0.00121951
2	M02_BrainSpanGenes	8	0.996673	0.00243902	9	0.720167	0.00243902	108	0.991183	0.00243902	98	0.421758	0.00243902
3	M03_BrainSpanGenes	10	0.959462	0.00365854	5	0.965919	0.00365854	55	1	0.00365854	39	1	0.00365854
4	M04_BrainSpanGenes	24	0.00109072	0.00487805	1	0.999484	0.00487805	112	0.017583	0.00487805	25	1	0.00487805
5	M05_BrainSpanGenes	10	0.740722	0.00609756	8	0.40873	0.00609756	73	0.976503	0.00609756	70	0.274644	0.00609756
6	M06_BrainSpanGenes	17	0.0351217	0.00731707	3	0.956032	0.00731707	81	0.48327	0.00731707	29	0.999998	0.00731707
7	M07_BrainSpanGenes	6	0.936702	0.00853659	26	1.64995e-10	0.00853659	34	1	0.00853659	104	1.32227e-10	0.00853659
8	M08_BrainSpanGenes	7	0.772018	0.0097561	2	0.969761	0.0097561	32	1	0.0097561	53	0.257655	0.0097561
9	M09_BrainSpanGenes	12	0.135257	0.0109756	3	0.885334	0.0109756	99	4.94992e-06	0.0109756	18	1	0.0109756
10	M10_BrainSpanGenes	9	0.342061	0.0121951	2	0.944748	0.0121951	60	0.382556	0.0121951	15	1	0.0121951
11	M11_BrainSpanGenes	9	0.248187	0.0134146	0	1	0.0134146	42	0.949525	0.0134146	16	0.999993	0.0134146
12	M12_BrainSpanGenes	1	0.998411	0.0146341	5	0.329474	0.0146341	37	0.967319	0.0146341	20	0.998561	0.0146341
13	M13_BrainSpanGenes	9	0.17704	0.0158537	2	0.895015	0.0158537	38	0.949622	0.0158537	10	1	0.0158537
14	M14_BrainSpanGenes	0	1	0.0170732	0	1	0.0170732	31	0.978416	0.0170732	2	1	0.0170732
15	M15_BrainSpanGenes	10	0.0508832	0.0182927	0	1	0.0182927	45	0.337695	0.0182927	16	0.999173	0.0182927
16	M16_BrainSpanGenes	0	1	0.0195122	4	0.382748	0.0195122	14	1	0.0195122	58	2.15266e-07	0.0195122
17	M17_BrainSpanGenes	1	0.994405	0.0207317	4	0.366312	0.0207317	20	0.999847	0.0207317	34	0.148461	0.0207317
18	M18_BrainSpanGenes	2	0.946253	0.0219512	0	1	0.0219512	34	0.598596	0.0219512	6	1	0.0219512
19	M19_BrainSpanGenes	4	0.659514	0.0231707	0	1	0.0231707	34	0.541519	0.0231707	3	1	0.0231707
20	M20_BrainSpanGenes	7	0.157456	0.0243902	0	1	0.0243902	41	0.111461	0.0243902	3	1	0.0243902
21	M21_BrainSpanGenes	3	0.815643	0.0256098	3	0.490541	0.0256098	8	1	0.0256098	19	0.894569	0.0256098
22	M22_BrainSpanGenes	0	1	0.0268293	1	0.921631	0.0268293	11	0.999998	0.0268293	14	0.987751	0.0268293
23	M23_BrainSpanGenes	0	1	0.0280488	6	0.0367392	0.0280488	11	0.999996	0.0280488	12	0.996272	0.0280488
24	M24_BrainSpanGenes	1	0.980452	0.0292683	2	0.679889	0.0292683	21	0.967184	0.0292683	30	0.0391939	0.0292683
25	M25_BrainSpanGenes	1	0.975752	0.0304878	0	1	0.0304878	20	0.961019	0.0304878	11	0.993357	0.0304878
26	M26_BrainSpanGenes	0	1	0.0317073	0	1	0.0317073	6	1	0.0317073	2	1	0.0317073
27	M27_BrainSpanGenes	3	0.622604	0.0329268	3	0.302046	0.0329268	43	0.00013627	0.0329268	4	0.999989	0.0329268
28	M28_BrainSpanGenes	3	0.56957	0.0341463	0	1	0.0341463	10	0.999404	0.0341463	1	1	0.0341463
29	M29_BrainSpanGenes	3	0.555621	0.0353659	1	0.828335	0.0353659	34	0.00673408	0.0353659	14	0.744844	0.0353659
30	M30_BrainSpanGenes	2	0.77651	0.0365854	0	1	0.0365854	6	0.999991	0.0365854	4	0.999929	0.0365854
31	M31_BrainSpanGenes	6	0.0626844	0.0378049	2	0.505373	0.0378049	41	2.75497e-05	0.0378049	2	0.999999	0.0378049
32	M32_BrainSpanGenes	3	0.478276	0.0390244	0	1	0.0390244	22	0.32062	0.0390244	11	0.858234	0.0390244
33	M33_BrainSpanGenes	0	1	0.0402439	1	0.78794	0.0402439	19	0.578607	0.0402439	8	0.976494	0.0402439
34	M34_BrainSpanGenes	0	1	0.0414634	1	0.773869	0.0414634	11	0.983754	0.0414634	1	0.999999	0.0414634
35	M35_BrainSpanGenes	2	0.664655	0.0426829	1	0.747561	0.0426829	23	0.0926724	0.0426829	12	0.611757	0.0426829
36	M36_BrainSpanGenes	7	0.00772457	0.0439024	0	1	0.0439024	25	0.0363376	0.0439024	2	0.999973	0.0439024
37	M37_BrainSpanGenes	0	1	0.045122	0	1	0.045122	9	0.989302	0.045122	5	0.994933	0.045122
38	M38_BrainSpanGenes	3	0.301173	0.0463415	2	0.321646	0.0463415	18	0.208277	0.0463415	4	0.995247	0.0463415
39	M39_BrainSpanGenes	1	0.825294	0.047561	0	1	0.047561	6	0.993206	0.047561	3	0.997123	0.047561
40	M40_BrainSpanGenes	0	1	0.0487805	0	1	0.0487805	0	1	0.0487805	0	1	0.0487805
41	M41_BrainSpanGenes	0	1	0.05	0	1	0.05	0	1	0.05	2	0.987813	0.05
