# Supplementary material for: Identification of a transcriptional signature found in multiple models of ASD and related disorders
Source: HighWire-hosted journal article supplement (doi:10.1101/gr.276591.122), 2022-09-01
Supplement: Supplemental_Table_S11.xlsx [file Supplemental_Table_S11.xlsx]

## Sheet: Legend
Supplemental_Table_S11
Summary table of all external datasets analyzed in this manuscript.

## Sheet: External Dataset Info
SRA	GEO accession	Organism	Disrupted gene or disease	Manipulation	Control	System	Age	PMID/DOI
SRP217122	GSE135287	Human	CREBBP/EP300	RTS1/RTS2 patients	Neurotypical	iPSC-derived induced neurons	35 and 70 DIV	32562237
SRP126560	GSE107878	Human	CHD8	CRISPR-mediated CHD8 KO in neurotypical iPSCs	Neurotypical	iPSC-derived induced neurons	28 DIV	30392976
SRP325023	GSE178646	Human	EHMT1	CRISPR-mediated EHMT1 SNV (EHMT1 p.Gln1144Ter) in neurotypical iPSCs	Neurotypical	iPSC-derived induced neural progenitor cells	24 DIV	35139903
SRP174367	GSE124308	Human	Idiopathic ASD	None	Neurotypical	iPSC-derived induced neurons	35 DIV	10.1038/s41598-018-26495-1
SRP056822	GSE67528	Human	Sporadic ASD	None	Neurotypical	iPSC-derived induced neurons	None	27378147
None	syn4587609	Human	Idiopathic ASD	None	Neurotypical	DLPFC/MPFC/superior dentate gyrus/cerebellar vermis	28 years	10.1038/nature20612
SRP132816	None	Human	Idiopathic ASD	None	Neurotypical	Prefrontal cortex/Anterior singulate cortex	14 years	10.1126/science.aav8130
SRP072713	GSE80017	Human	Idiopathic ASD	None	Neurotypical	Prefrontal cortex	15 years	10.1007/s12035-020-01879-5
SRP115571	GSE102741	Human	Idiopathic ASD	None	Neurotypical	DLPFC	22 years	28485729
SRP201904	GSE133018	Mouse	Crebbp/p300	Crebbp/p300 dKO (dKAT3-ifKOs)	WT	Hippocampus	3-4 month	32444594
SRP102009	None	Mouse	Chd8	Chd8 +/- LOF	WT	Nucleus accumbens	3 month	10.1016/j.celrep.2017.03.052
SRP091938	GSE89010	Mouse	Ehmt1	Ehmt1 +/-	WT	Hippocampus	1 month	29554304
SRP239057	GSE142716	Mouse	Mecp2	MeCP2 -/- (neuronal-specific)	WT	Cerebral cortex	1.5 month	34599184
SRP239057	GSE142716	Mouse	Mecp2	MeCP2 mutant (T158M)	WT	Cerebral cortex	1.5 month	34599184
SRP101991	GSE96684	Mouse	Mecp2	MeCP2 mutant (Mecp2tm1.1Jae/y)	WT	Whole cortex	2 month	29090078
SRP101279	GSE95626	Mouse	Kmt2d/Mll4	Mll4 f/f (brain-specific knockout)	WT	Cerebellum	1 month	29861161
SRP187215	GSE127723	Mouse	Gtf2i/Gtf2ird1	Gtf2i/Gtf2ird1 Het	WT	Hippocampus	Adult	31418010
SRP187215	GSE127723	Mouse	WSCR	Complete Deletion of Williams Syndrome critical region (1.5-1.8Mb on 7q11.23)	WT	Hippocampus	Adult	31418010
SRP070769	GSE78272	Mouse	Htt	140 CAG repeat Knock-in	WT	Cerebral Cortex	6 month	26900923
SRP053401	GSE65775	Mouse	Htt	175 CAG repeat Knock-in	WT	Cortex	6 month	26900923
SRP053401	GSE65775	Mouse	Htt	175 CAG repeat Knock-in	WT	Hippocampus	6 month	26900923
SRP227985	GSE139847	Mouse	Htt	115 CAG repeat Knock-in (R6/1 mouse)	WT	Striatum	2 month	31744868
SRP074611	GSE81251	Mouse	Kdm6a	Kdm6a KO (neuron-specific)	WT	None	None	None
